# Supplementary material for: On the prevalence of bridged macrocyclic pyrroloindolines formed in regiodivergent alkylations of tryptophan
Source: PubMed Central journal article supplement — Chem Sci. 2016 Mar 9;7(7):4158–66. doi: 10.1039/c5sc04612b (PMC6014094; doi:10.1039/c5sc04612b), 2016-03-09
Supplement: SC-007-C5SC04612B-s001.pdf [file SC-007-C5SC04612B-s001.pdf]

## On the prevalence of bridged macrocyclic pyrroloindolines formed in regiodivergent alkylations of tryptophan

Tristin E. Rose,<sup>†</sup> Brice H. Curtin,<sup>†</sup> Kenneth V. Lawson,<sup>†</sup> Adam Simon, K. N. Houk, Patrick G. Harran  
*Department of Chemistry and Biochemistry, University of California Los Angeles*  
*607 Charles E. Young Drive East, Los Angeles, CA 90095-1569*

### Supporting Material

#### Table of Contents

|                                                                                                                |    |
|----------------------------------------------------------------------------------------------------------------|----|
| <b>A. Supplementary Figures S1–S10</b> .....                                                                   | 2  |
| <b>B. Computational Results, Methods, &amp; Supplementary Figures S11–S17</b> .....                            | 6  |
| <b>C. General Synthetic Considerations</b> .....                                                               | 13 |
| <b>D. Experimental Procedures</b> .....                                                                        | 13 |
| 1. Acyclic intermediates and macroclization products .....                                                     | 15 |
| 2. Synthesis of model <i>endo</i> -pyrroloindoline <b>21a</b> and <i>exo</i> -pyrroloindoline <b>21b</b> ..... | 68 |
| 3. Selective synthesis of pyrroloindoline <b>9d</b> .....                                                      | 69 |
| 4. Reaction of trifunctional template <b>28</b> with Trp-Trp-Tyr .....                                         | 71 |
| 5. Cartesian Coordinates and Energies .....                                                                    | 78 |

## A. Supplementary Figures

Figure S1. **Phe-Trp(5Me)-Thr**. Comparative performance of Tf<sub>2</sub>NH and MeSO<sub>3</sub>H in cyclization of linear precursor **6**.

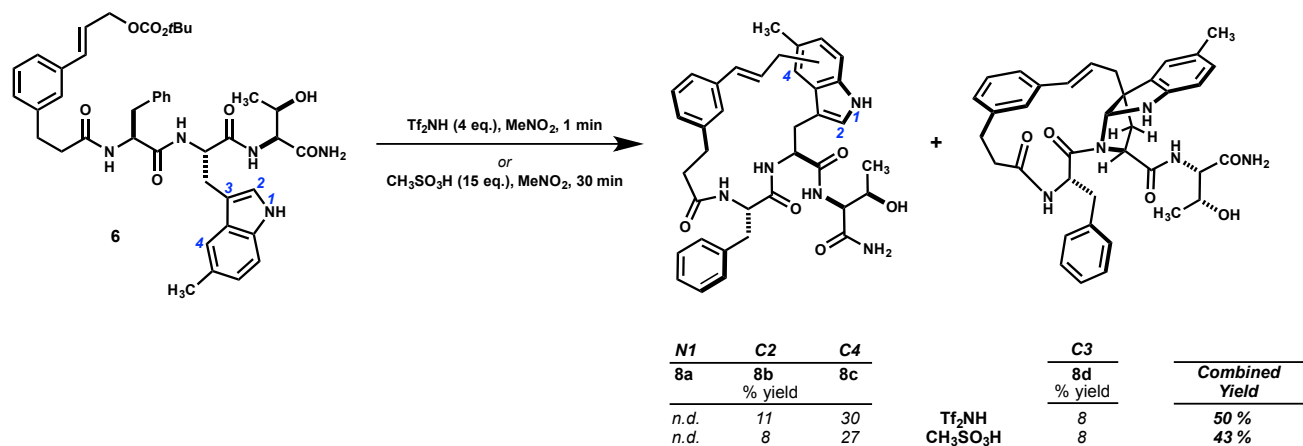

Figure S2. **Phe-Trp(5F)-Thr**. Comparative performance of Tf<sub>2</sub>NH and MeSO<sub>3</sub>H in cyclization of linear precursor **7**.

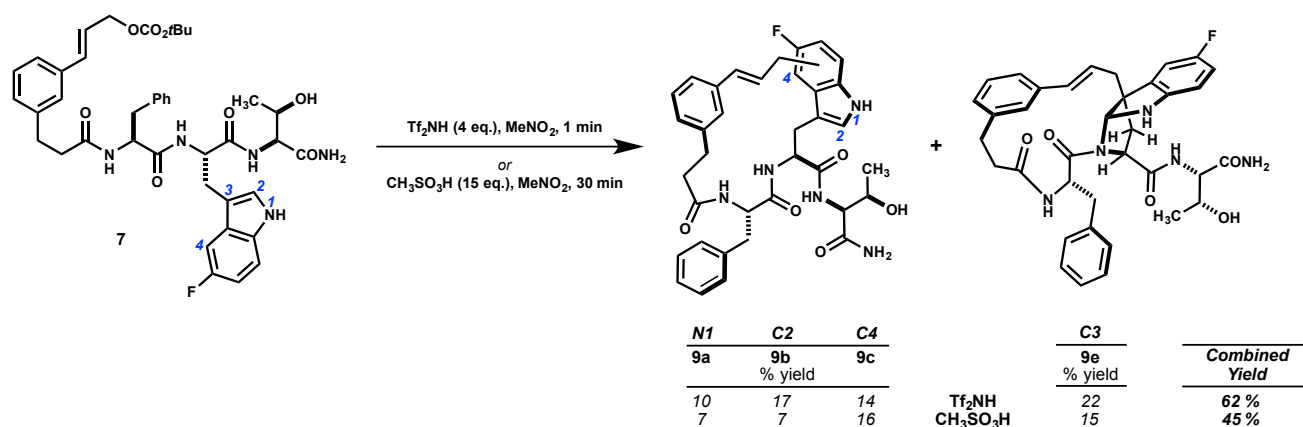

Figure S3. **Ala-Gln-His-Trp(5F)-Arg**. Comparative performance of Tf<sub>2</sub>NH and MeSO<sub>3</sub>H in cyclization of linear precursor **10**.

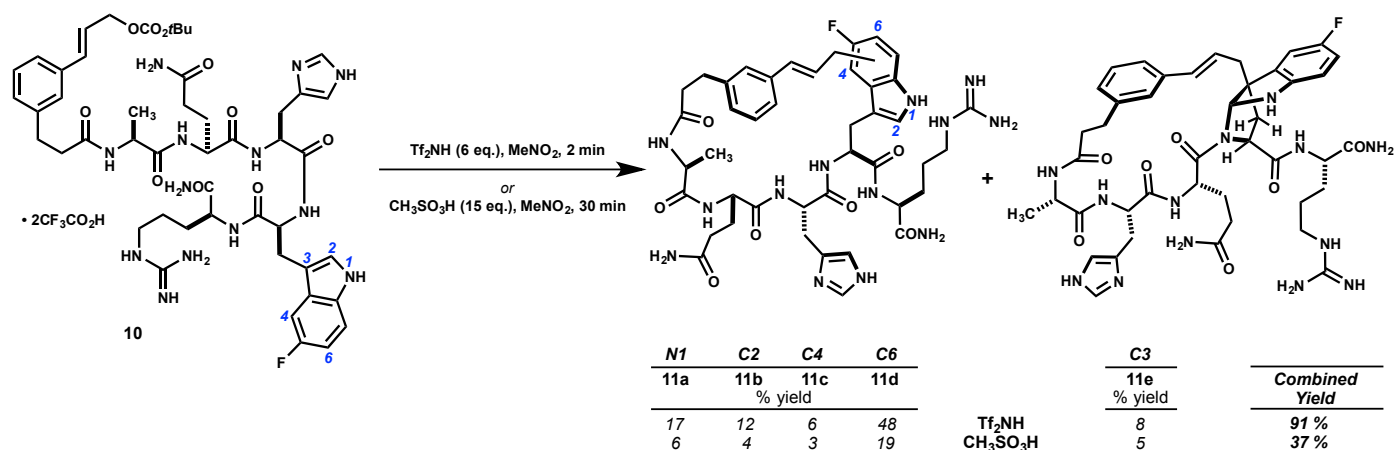

Figure S4. **Trp(5Br)-Ser-Ile-Ala**. Comparative performance of Tf<sub>2</sub>NH and MeSO<sub>3</sub>H in cyclization of linear precursor **12**.

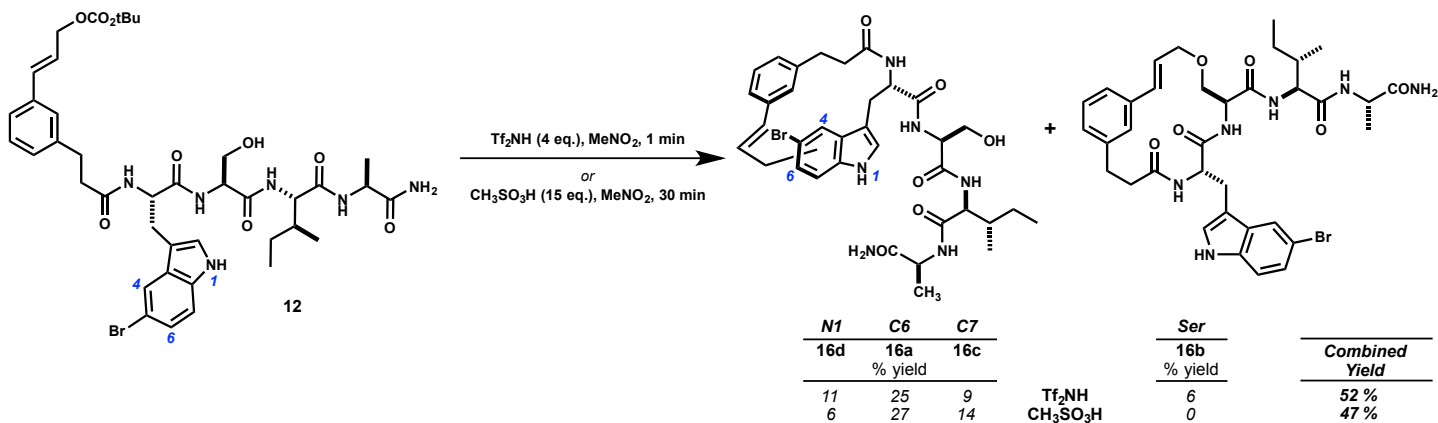

Figure S5. **Ser-Trp(5Br)-Ile-Ala**. Comparative performance of Tf<sub>2</sub>NH and MeSO<sub>3</sub>H in cyclization of linear precursor **13**.

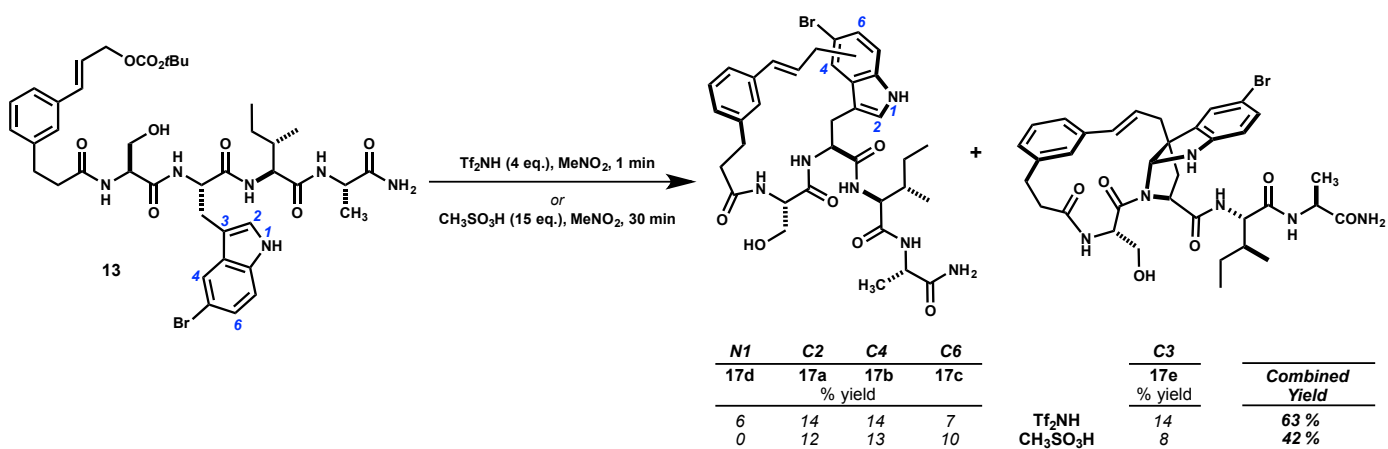

Figure S6. **Ser-Ile-Trp(5Br)-Ala**. Comparative performance of Tf<sub>2</sub>NH and MeSO<sub>3</sub>H in cyclization of linear precursor **14**.

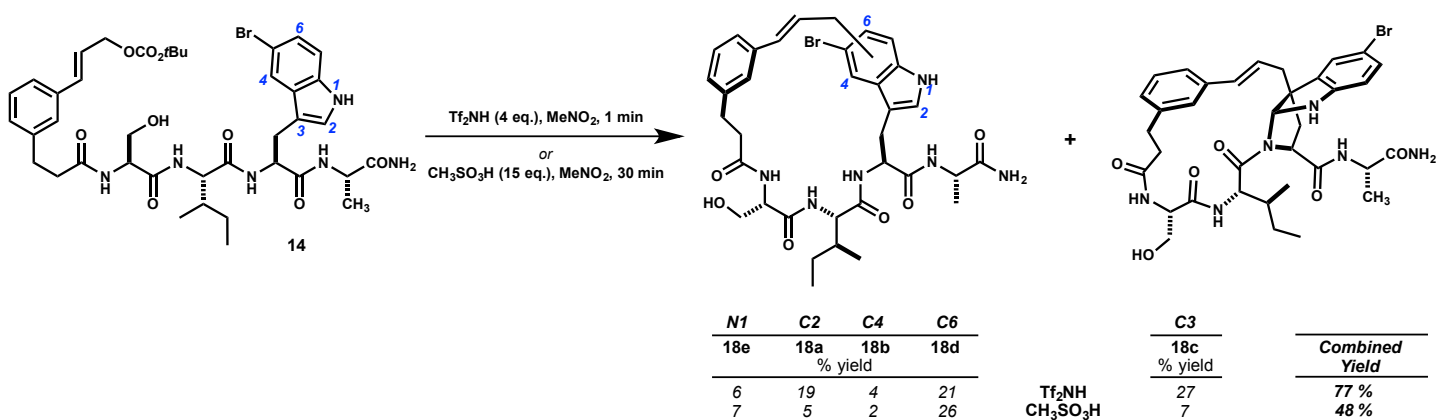

Figure S7. **Ser-Ile-Ala-Trp(5Br)**. Comparative performance of Tf<sub>2</sub>NH and MeSO<sub>3</sub>H in cyclization of linear precursor **15**.

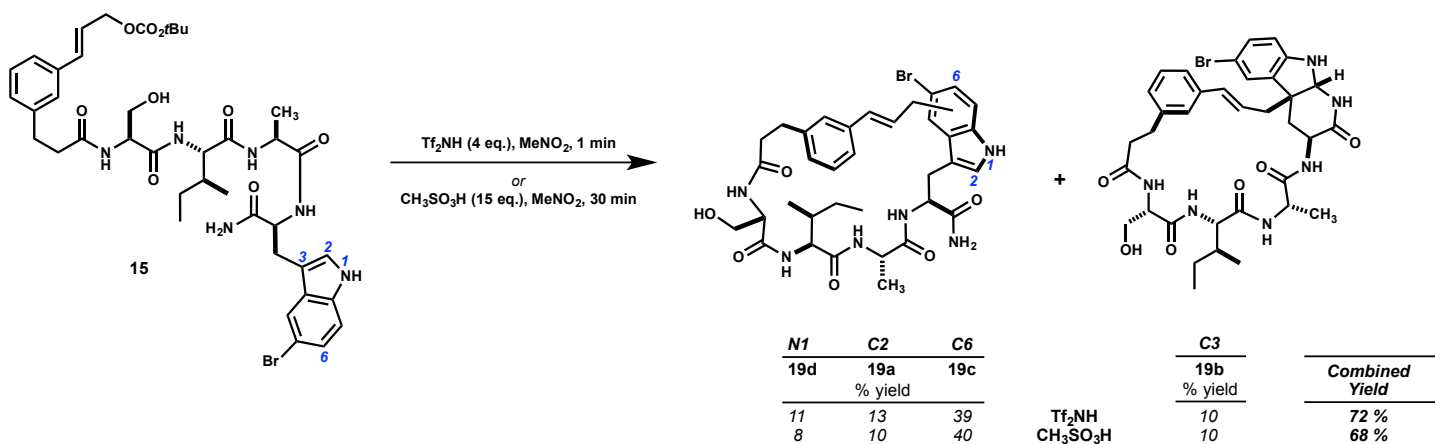

Figure S8. **Nva-Asp-Val-Trp(5Br)**. Cyclization of **S1** promoted by Tf<sub>2</sub>NH forms diastereomeric pyrroindolines **S2a** & **b**.

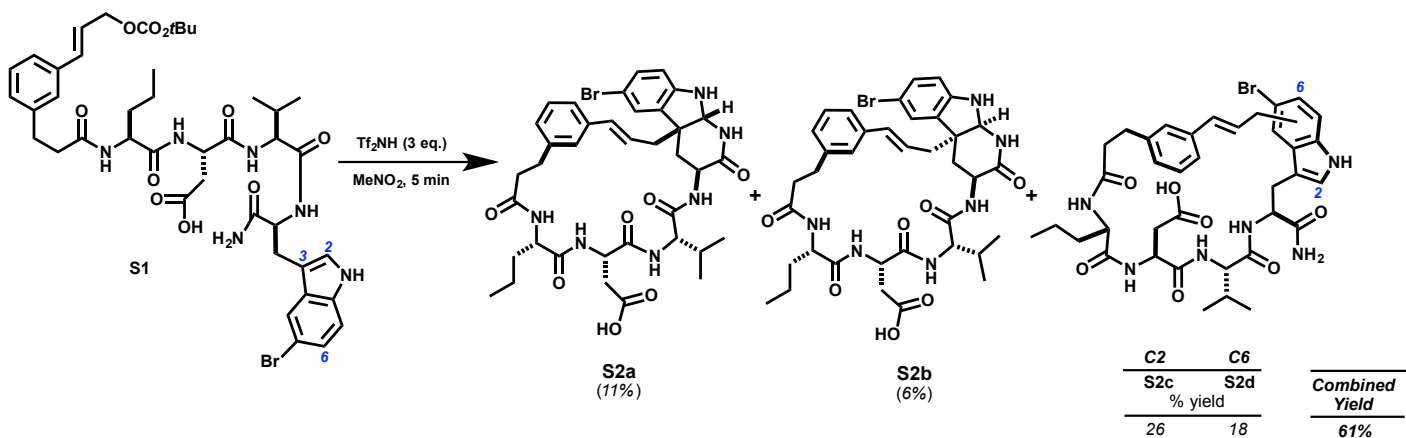

Figure S9. **Ac-Orn(H)-Ile-Pro-Trp(5F)**. Cyclization of **S3** promoted by MeSO<sub>3</sub>H did not yield an analogous pyrroindoline.

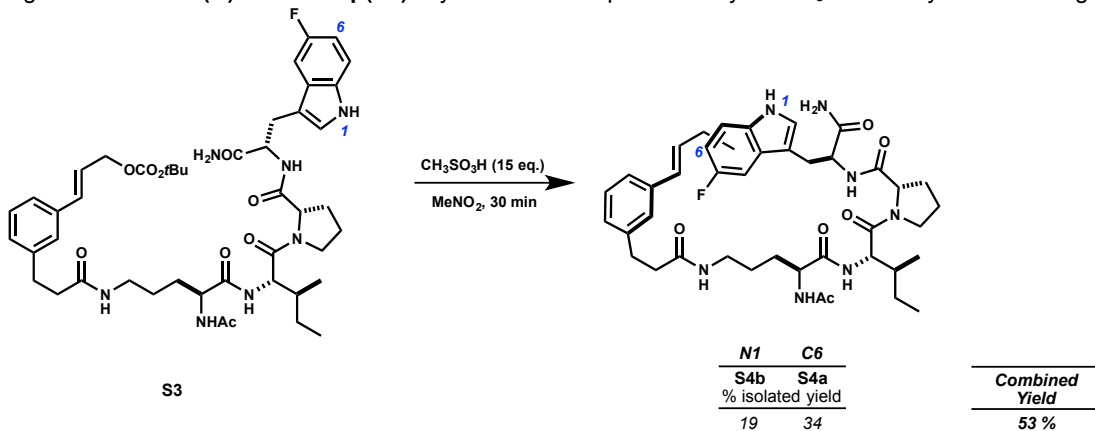

Figure S10. **Val-Gly-Trp(5Br)-Phe**. Cyclization of **S5** promoted by MeSO<sub>3</sub>H did not yield an analogous pyrroloindoline.

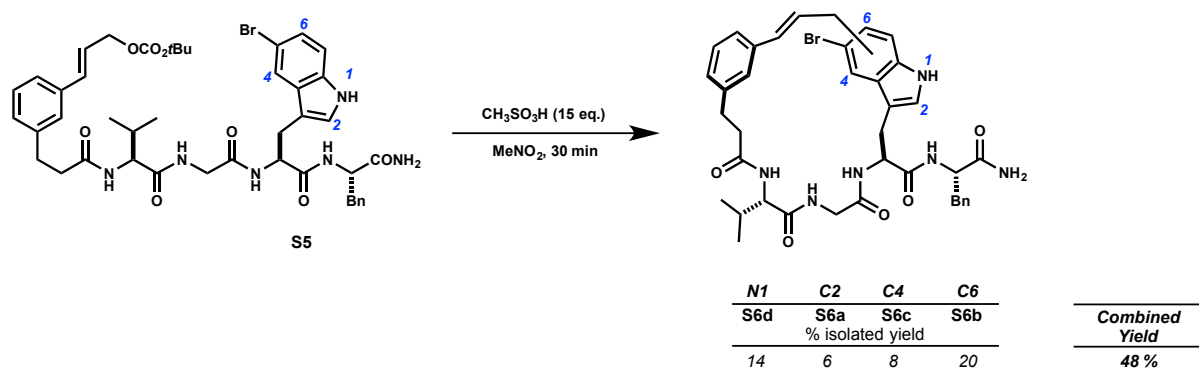

## B. Computational Results and Discussion

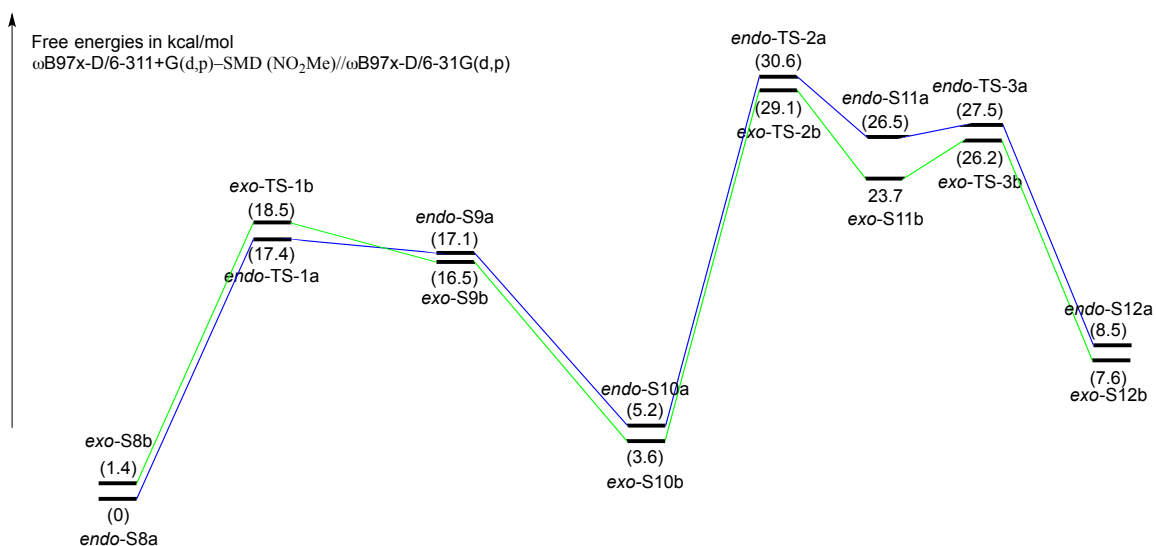

**Figure S11.** Free energy profile for the 1,2-rearrangement of *exo*- and *endo*-pyrroloindolines shown in Figure 3 (where R=Me). ( $\omega$ B97x-D/6-311+G(d,p)-SMD (nitromethane) //  $\omega$ B97x-D/6-31G(d,p)) The relative free energies are compared with *endo*-S8a and are reported in kcal/mol. The blue pathway represents the *endo* reaction profile, and the green pathway represents the *exo* reaction profile.

The free energy profile in Figure S11 was calculated for the cinnamyl 1,2-rearrangement shown in Figure 3 (where R=Me). The neutral pyrroloindolines are protonated at the acetyl oxygen to form *endo*-S8a and *exo*-S8b, shown in Figure S12. The protonation transition state was not determined. *Endo*-S8a is the lowest-energy intermediate of the free energy profile. The *exo*-pyrroloindolinium, *exo*-S8b, is higher in energy by 1.4 kcal/mol. The calculated geometries of intermediates S8-S10, and S12 are shown in Figure S12. The protonated species proceed through the ring opening transition structures, *endo*-TS-1a and *exo*-TS-1b, shown in Figure S13.

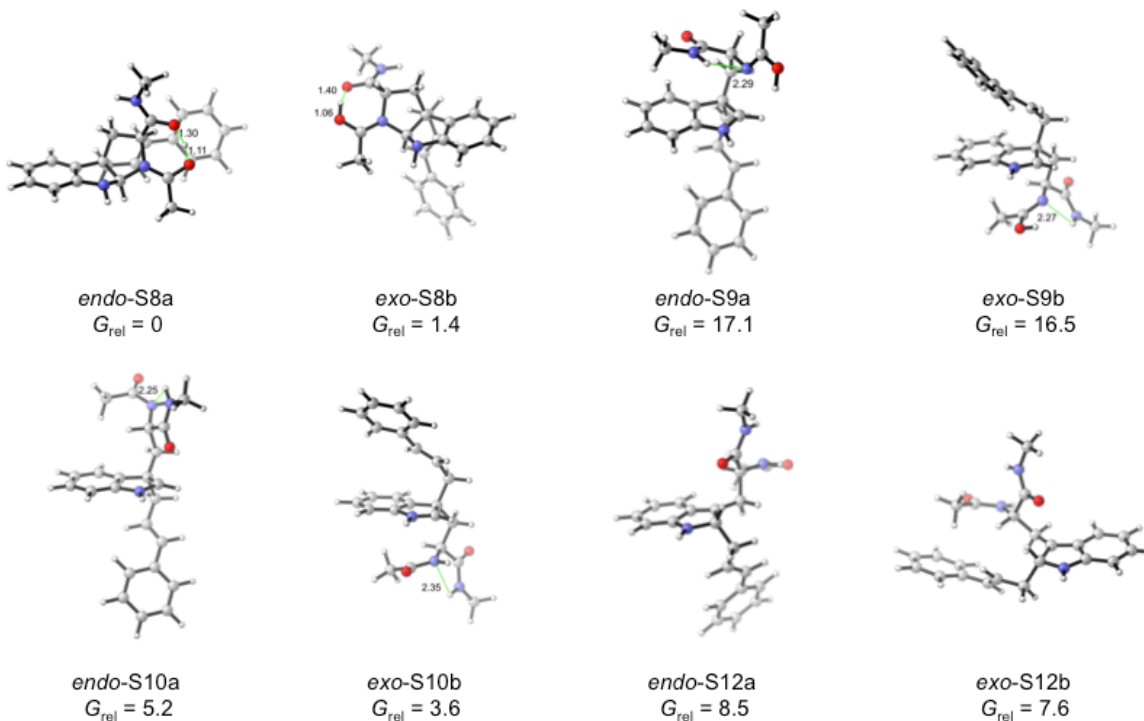

**Figure S12.** Lowest-energy intermediates S8-S10, and S12 for the free energy profile in Figure S11. ( $\omega$ B97x-D/6-311+G(d,p)-SMD (nitromethane) //  $\omega$ B97x-D/6-31G(d,p)). The relative free energies are compared with *endo*-S8a and are reported in kcal/mol.

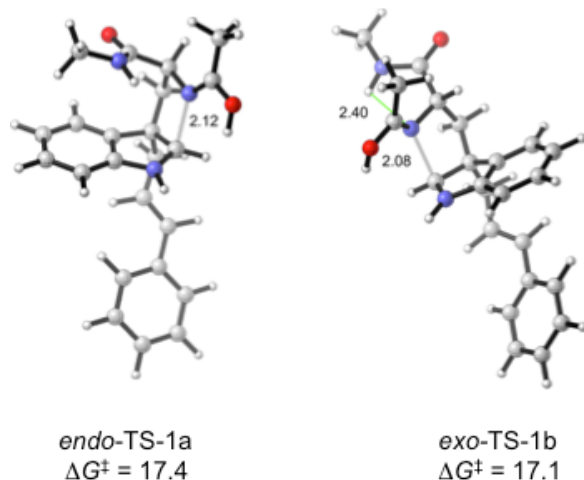

**Figure S13. Lowest-energy transition structures *endo*-TS-1a and *exo*-TS-1b for the ring opening reaction of *endo*-S8a and *exo*-S8b.** ( $\omega$ B97x-D/6-311+G(d,p)-SMD (nitromethane) //  $\omega$ B97x-D/6-31G(d,p)). The free energy of activation barrier for *endo*-TS-1a is compared to *endo*-S8a, and the free energy of activation barrier for *exo*-TS-1b is compared to *exo*-S8b. The free energies are reported in kcal/mol.

The *endo* transition structure *endo*-TS-1a has a barrier of 17.4 kcal/mol, relative to *endo*-S8a. The *exo* transition structure *exo*-TS-1b has a barrier of 17.1 kcal/mol, relative to *exo*-S8b. Intermediates *endo*-S9a and *exo*-S9b are iminol tautomers, which tautomerize to amides *endo*-S10a and *exo*-S10b. The transition states for these tautomerizations were not calculated. The pyrroloindoliniums *endo*-S10a and *exo*-S10b undergo 1,2-rearrangement through a stepwise mechanism of disassociation, leading to a complex between the indolinium and cinnamyl group, followed by addition to indole C2. The transition structures *endo*-TS-2a and *exo*-TS-2b have barriers of 30.6 and 27.7 kcal/mol, respectively, and are shown in Figure S14. The dissociation transition structures lead to complexes *endo*-S11a and *exo*-S11b. These complexes undergo addition to indole C2 via transition structures *endo*-TS-3a and *exo*-TS-3b with barriers of 27.5 kcal/mol and 24.8 kcal/mol, respectively. These transition structures lead to cations *endo*-S12a and *exo*-S12b, which are deprotonated to form the neutral C2-cinnamyl indole S13.

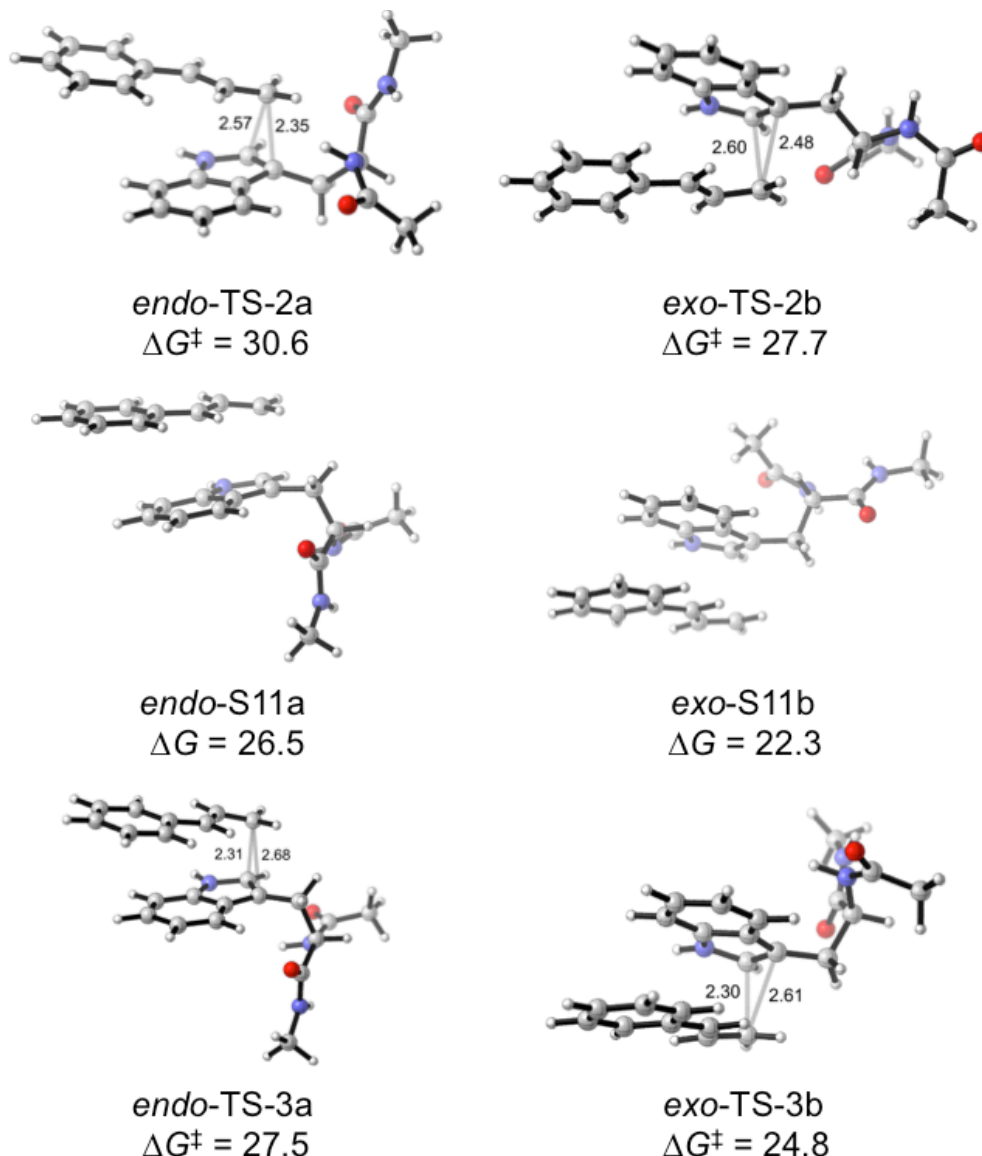

**Figure S14.** Lowest-energy transition structures *endo*-TS-2a, *exo*-TS-2b, *endo*-TS-3a, and *exo*-TS-3b for the stepwise 1,2-rearrangement of *endo*-S10a and *exo*-S10b, and the complexes *endo*-S11a and *exo*-S11b interceding these transition structures ( $\omega$ B97x-D/6-311+G(d,p)-SMD (nitromethane) //  $\omega$ B97x-D/6-31G(d,p)). The free energy of activation barrier for *endo*-TS-2a and *endo*-TS-3a is compared to *endo*-S8a, and the free energy of activation barrier for *exo*-TS-2b and *exo*-TS-3b is compared to *exo*-S8b. The difference in free energy for *endo*-S11a is compared to *endo*-S8a, and *exo*-S11b is compared with *exo*-S8b. The free energies are reported in kcal/mol.

It was found that the dissociation transition structures *endo*-TS-2a and *exo*-TS-2b are the highest-energy barriers and are rate-determining. The difference in free energy of activation for the *exo*- and *endo*- processes is 2.9 kcal/mol, where the *exo*- is lower in energy. The difference in energy arises from two factors: (1) The greater stability of intermediate *endo*-S8a over *exo*-S8b by 1.4 kcal/mol. (2) The stability of the *exo*-TS-2b over *endo*-TS-2a by 1.5 kcal/mol. The *exo*- transition structure is lower in energy due to stabilizing electrostatic interactions between the carbonyl oxygen of the acetamide group and electropositive indolinium ring. This stabilizing electrostatic effect does not occur in *endo*-TS-2a, due to the configuration of the alanyl moiety.



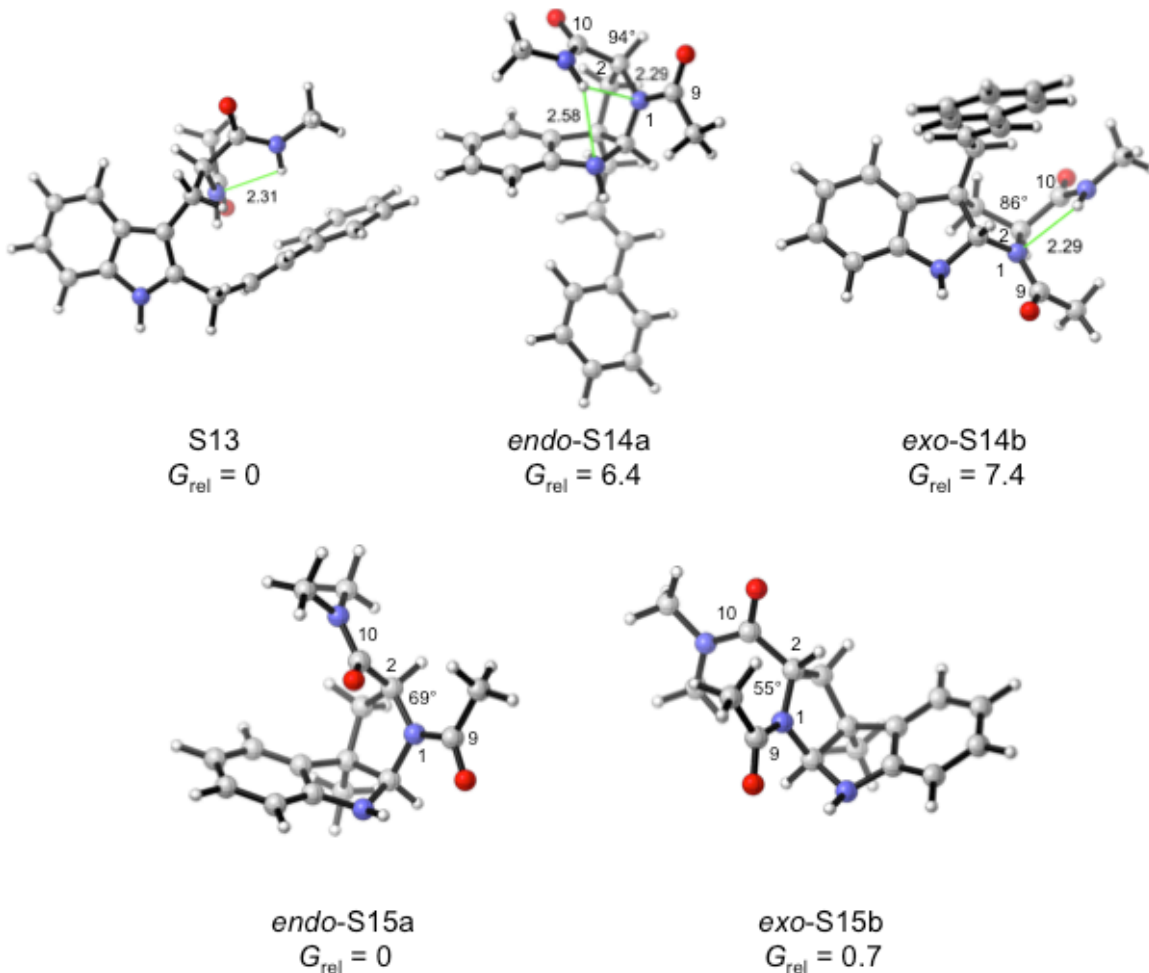

**Figure S15. Lowest-energy ground states for the neutral pyrroloindolines S14, S15, and C2-linked product S13.** ( $\omega$ B97x-D/6-311+G(d,p)-SMD (nitromethane) //  $\omega$ B97x-D/6-31G(d,p)). The relative free energies of *endo*-S14a and *exo*-S14b are compared to S13. The relative free energy of *N,N*-dimethylated variant *exo*-S15b is compared to *endo*-S15a. The relative free energies are reported in kcal/mol.

The neutral pyrroloindolines, shown in Figure S15, were calculated and it was found that the aromatized C2-cinnamyl indole S13 was the thermodynamic product. The *endo*-pyrroloindoline *endo*-S14a is 6.4 kcal/mol higher in energy than S13. The *exo*-S14b is 7.4 kcal/mol higher in energy than S13. Consistent with findings of Crich,<sup>1</sup> the *exo*-S14b is less stable compared to *endo*-S14a due primarily to 1,3-allylic strain. The 1.0 kcal/mol difference arises from the steric interactions between the N1-acetyl group and C2-acetamidyl group. As shown in Figure S15, the exocyclic dihedral angle between C9-N1-C2-C10 is 94° for *endo*-S14a and 86° for *exo*-S14b. To test whether the difference in energy was due to an intramolecular hydrogen bond we calculated a model where the acetamide group was *N,N*-dimethylated (the cinnamyl group was truncated to methyl). From this, the lowest-energy model pyrroloindolines *endo*-S15a and *exo*-S15b, shown in Figure S15. The *endo*-model S15a is 0.7 kcal/mol more stable than the *exo*-model S15b. The dihedral angles of the C9-N1-C2-C10 bonds are 69° for the *endo*-S15a and 55° for the *exo*-S15b, consistent with the findings for *endo*-S14a and *exo*-S14b.

<sup>1</sup> D. Crich, M. Bruncko, S. Natarajan, B. Teo and D. Tocher, *Tetrahedron* 1995, **51**, 2215.

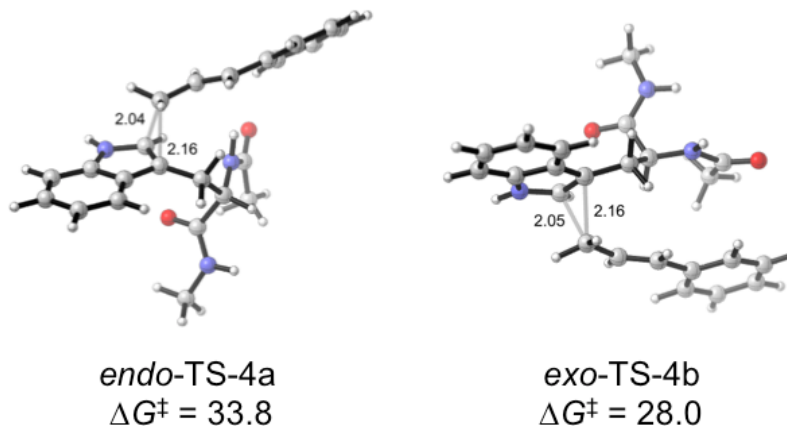

**Figure S16.** Lowest-energy transition structures *endo*-TS-4a and *exo*-TS-4b for the concerted 1,2-rearrangement of *endo*-S10a and *exo*-S10b. ( $\omega$ B97x-D/6-311+G(d,p)-SMD (nitromethane) //  $\omega$ B97x-D/6-31G(d,p)). The free energy of activation barrier for *endo*-TS-4a is compared to *endo*-S8a, and the free energy of activation barrier for *exo*-TS-4b is compared to *exo*-S8b. The free energies are reported in kcal/mol.

In addition to the stepwise 1,2-rearrangement, a concerted pathway was also located, and is shown in Figure S16. The transition structures *endo*-TS-4a and *exo*-TS-4b were the lowest-energy structures located for the *exo* and *endo* pathways. Both transition structures are concerted 1,2-shifts of the cinnamyl group from indole C3 to C2. The free energy of activation barrier for *endo*-TS-4a is 33.8 kcal/mol, and 28.0 kcal/mol for *exo*-TS-4b. The stabilization of the *exo* transition structure over the *endo* is due to similar effects observed for the TS-2 series, where there is a stabilizing electrostatic interaction in *exo*-TS-4b not present in *endo*-TS-4a. The activation barrier for *endo*-TS-4a is 3.2 kcal/mol higher than *endo*-TS-2a, and thus the *endo* pyrroloindolines react via stepwise 1,2-rearrangements. However, *exo*-TS-4b is only 0.3 kcal/mol higher in energy than *exo*-TS-2b. Thus, *exo*-pyrroloindolines can react through either stepwise or concerted 1,2-rearrangements.

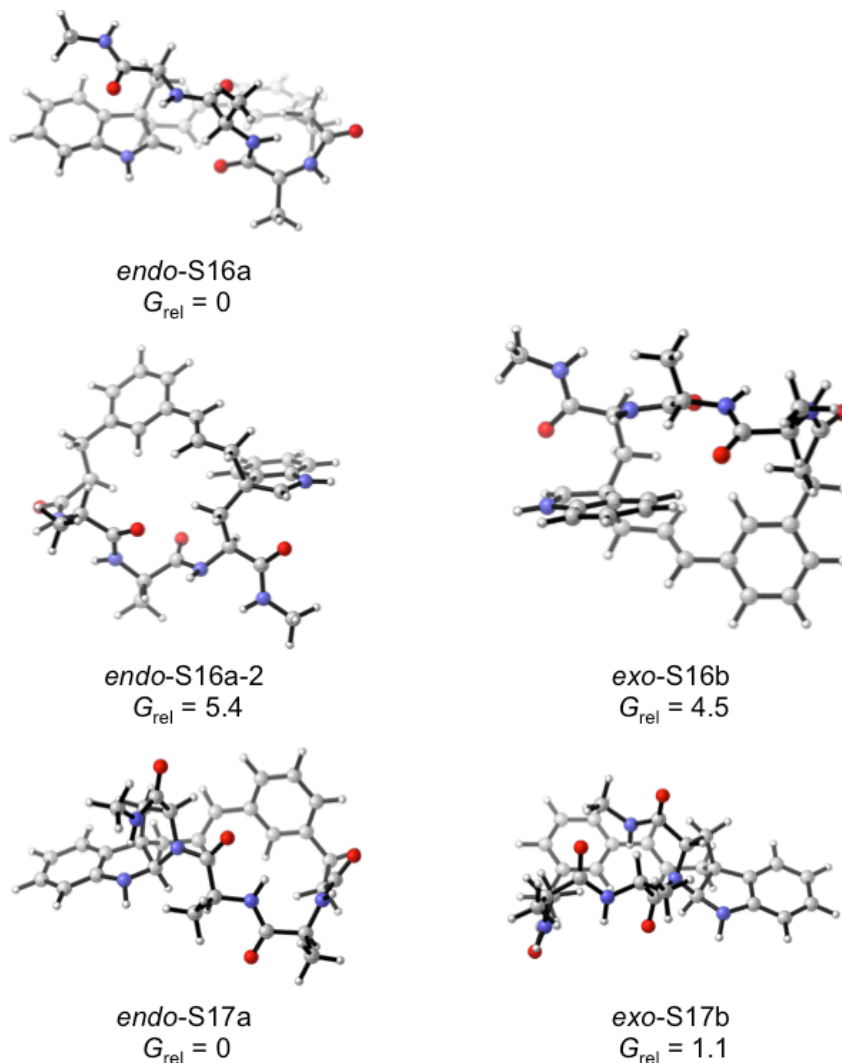

**Figure S17. Lowest-energy ground states of truncated macrocycles S16-S17.** ( $\omega$ B97x-D/6-311+G(d,p)-SMD (nitromethane) //  $\omega$ B97x-D/6-31G(d,p)). These models are truncated, neutral variants of macrocyclic pyrroloindolines **18c** (for **S17**) and **20** (for **S16**) where peptide side chains were replaced with methyl groups. The relative free energies of *endo*-**S14a** and *exo*-**S14b** are compared to **S13**. The relative free energy of *exo*-**S15b** is compared to *endo*-**S15a**. The relative free energies are reported in kcal/mol.

Truncated models of macrocyclic *endo*-pyrroloindoline **18c** and its open-chain iminol tautomer **20** – as well as diastereomers corresponding to *exo*-**18c** (not isolated) – were calculated to estimate the feasibility of stepwise 1,2-rearrangement in macrocyclic systems. Peptide side chains were replaced with methyl groups for calculation. *Endo*-**S16a** and *exo*-**S16b** are the lowest-energy calculated intermediates, analogous to *endo*-**S10a** and *exo*-**S10b**. It was found that *endo*-**S16a** is preferred over *exo*-**S16b** by 4.5 kcal/mol. The cinnamyl group in *endo*-**S16a** does not overlap with the indolinium ring. However, we located a conformation higher in energy by 5.4 kcal/mol, *endo*-**S16a-2**, where the cinnamyl group can overlap with the indolinium ring analogously to complexes **S11a,b**. *Exo*-**S16b** adopts a conformation where the cinnamyl group is proximal to the indolinium ring and is 4.5 kcal/mol higher in energy than *endo*-**S16a**. Thus, these conformations suggest that the dissociated complex geometry in the stepwise 1,2-rearrangement of model pyrroloindolines is also feasible in macrocyclic variants. For neutral pyrroloindolines, *endo*-**S17a** was found to be lower in energy than *exo*-**S17b** by 1.1 kcal/mol. This energy difference was found to arise from 1,3-allylic strain, similarly to the model substrates *endo*-**S14a** and *exo*-**S14b**.

## Computational Methods

All quantum chemical calculations were performed with Gaussian 09.<sup>2</sup> Geometry optimizations and frequencies were calculated with the  $\omega$ B97x-D<sup>3</sup> (*in vacuo*) density functional with the 6-31G(d,p) basis set. Optimized geometries were verified by frequency calculations as minima (zero imaginary frequencies) or transition structures (a single imaginary frequency). Free energy corrections were determined using unscaled  $\omega$ B97x-D/6-31G(d,p) vibrational frequencies assuming a standard state of 1 atm and 298.15 K. Errors in the treatment of low modes as harmonic oscillations were mitigated by use of the quasiharmonic approximation proposed by Truhlar and coworkers.<sup>4</sup> Single point energy calculations were performed on optimized geometries with  $\omega$ B97x-D/6-311+G(d,p). The free energies reported herein were determined by adding zero-point energy and thermal correction determined using  $\omega$ B97x-D/6-31G(d,p) to electronic energies computed at the  $\omega$ B97x-D/6-311+G(d,p) level of theory.

Monte Carlo conformational searches were performed on the intermediates using the OPLS-2005 force field<sup>5</sup> in Maestro/Macromodel.<sup>6</sup> Reactive conformations with the distance between the bond-forming atoms shorter than 4.0 Å were used as input geometries for transition structure optimizations.

---

<sup>2</sup> Gaussian 09, Revision D.01, M. J. Frisch, G. W. Trucks, H. B. Schlegel, G. E. Scuseria, M. A. Robb, J. R. Cheeseman, G. Scalmani, V. Barone, B. Mennucci, G. A. Petersson, H. Nakatsuji, M. Caricato, X. Li, H. P. Hratchian, A. F. Izmaylov, J. Bloino, G. Zheng, J. L. Sonnenberg, M. Hada, M. Ehara, K. Toyota, R. Fukuda, J. Hasegawa, M. Ishida, T. Nakajima, Y. Honda, O. Kitao, H. Nakai, T. Vreven, J. A. Jr. Montgomery, J. E. Peralta, F. Ogliaro, M. Bearpark, J. J. Heyd, E. Brothers, K. N. Kudin, V. N. Staroverov, R. Kobayashi, J. Normand, K. Raghavachari, A. Rendell, J. C. Burant, S. S. Iyengar, J. Tomasi, M. Cossi, N. Rega, J. M. Millam, M. Klene, J. E. Knox, J. B. Cross, V. Bakken, C. Adamo, J. Jaramillo, R. Gomperts, R. E. Stratmann, O. Yazyev, A. J. Austin, R. Cammi, C. Pomelli, J. W. Ochterski, R. L. Martin, K. Morokuma, V. G. Zakrzewski, G. A. Voth, P. Salvador, J. J. Dannenberg, S. Dapprich, A. D. Daniels, Ö. Farkas, J. B. Foresman, J. V. Ortiz, J. Cioslowski, and D. J. Fox, Gaussian, Inc., Wallingford CT, 2009.

<sup>3</sup> J.-D. Chai, and M. Head-Gordon, *Phys. Chem. Chem. Phys.* 2008, **10**, 6615.

<sup>4</sup> Y. Zhao, and D. G. Truhlar, *Phys. Chem. Chem. Phys.* 2008, **10**, 2813.

<sup>5</sup> J. L. Banks, H. S. Beard, X. Y. Cao, A. E. Cho, W. Damm, R. Farid, A. K. Felts, T. A. Halgren, D. T. Mainz, J. R. Maple, R. Murphy, D. M. Philipp, M. P. Repasky, L. Y. Zhang, B. J. Berne, R. A. Friesner, E. Gallicchio, and R. M. Levy, *J. Comp. Chem.* 2005, **26**, 1752.

<sup>6</sup> Schrödinger Release 2015-3: MacroModel, version 10.9, Schrödinger, LLC, New York, NY, 2015.

## C. General Considerations

Fmoc-5-bromo-L-tryptophan, Fmoc-5-fluoro-L-tryptophan, and Fmoc-5-methyl-L-tryptophan were synthesized by kinetic enzymatic resolution of their racemates according to published procedures.<sup>7</sup> Triflimide was purchased from Oakwood and handled under a dry atmosphere of argon to prepare stock solutions in MeNO<sub>2</sub> (1 mg/mL). Methanesulfonic acid ≥99.5% was purchased from Aldrich.

### Nitromethane Purification

Pre-treatment of commercial grade nitromethane with either 3Å molecular sieves (7 days) or activated neutral alumina (Aldrich, 58 Å, activated Brockman I, 150 mesh, 12 hrs) is essential for optimal results in Friedel-Crafts cyclizations. Adding H<sub>2</sub>O (up to 1000 ppm) to the resultant dry nitromethane has no deleterious effects. For further discussions see: Rose, T. E. Ph.D. Dissertation [Online], University of California, Los Angeles, 2015. pp. 158-160. <http://escholarship.org/uc/item/0mx7x1st> (Accessed Oct 2, 2015). UMI: 3706064.

### HPLC Analysis and Purification

Purification of acidolysis products was performed on an Agilent 1100/1200 HPLC system equipped with G1361A preparative pumps, a G1314A autosampler, a G1314A VWD, and a G1364B automated fraction collector. Analytical HPLC was performed using an identical system, but with a G1312A binary pump. Mass spectra were recorded using an Agilent 6130 LC/MS system equipped with an ESI source. Stationary phase and gradient profile are noted for individual reactions below.

### NMR Methods

NMR spectra were recorded on Bruker Advance (500 or 600 MHz) or DRX (500 MHz) spectrometers. 2D NMR data were acquired as previously detailed.<sup>8</sup>

## D. Experimental Procedures

### Peptide Synthesis

All peptides were synthesized via standard Fmoc solid phase peptide synthesis conditions using Rink Amide MBHA resin (polystyrene, 1% DVB, 0.7 mmol/g).<sup>9</sup>

### Linear Precursors Synthesis

Template **1** was prepared as described.<sup>10</sup>

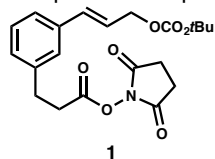

**General procedure A – Acylation of peptide by template 1:** A round bottom flask was charged with peptide (1.1 equiv.), DMF (10 mL), and *i*Pr<sub>2</sub>NEt (4.0 – 6.0 eq.), followed by template **1** (1.0 eq.). Reaction progress was monitored by analytical HPLC-UV/MS. Reactions were worked up and purified by column chromatography, trituration, or by preparative HPLC (25%→78% [7 min.] ACN + 0.1% TFA, 18 mL/min, Sunfire C<sub>18</sub> 19x250 mm) - see details for individual examples below.

### General procedure B – Macrocyclization

#### Using Tf<sub>2</sub>NH:

A flask was charged with linear precursor (1 eq.) and nitromethane (5 mM in substrate). The heterogeneous mixture was flushed with argon for 10 mins. A stock solution of Tf<sub>2</sub>NH in MeNO<sub>2</sub> (4.0 – 6.0 eq., 1 mg/mL stock) was then quickly added. The heterogeneous slurry homogenized and became purple in color. The reaction was stirred for 1 minute (2 minutes for **10**). The reaction was quenched with excess *i*Pr<sub>2</sub>NEt and concentrated *in vacuo*. The mixture was concentrated, further dried *in vacuo*, diluted with DMSO, and an aliquot was removed and spiked with an equal concentration of internal standard (starting linear precursor). This aliquot was analyzed by HPLC-UV (254 nm) and product peaks were integrated and divided by the internal standard area to provide a yield – uncharacterized products were *not* included towards total yield. Product mixtures were resolved by preparative HPLC purification — see details per example, below.

#### Using MeSO<sub>3</sub>H:

Reactions were carried out in the same manner as for Tf<sub>2</sub>NH but using instead MeSO<sub>3</sub>H (75 mM in MeNO<sub>2</sub>, 5 mM in substrate), and were stirred for 30 mins, then neutralized by the addition of *i*Pr<sub>2</sub>NEt.

### Isomerization of macrocyclic pyrroloindoline **18c**:

Purified **18c** was dissolved in a vigorously stirred solution of 1:4 TFA/CH<sub>3</sub>NO<sub>2</sub> at room temperature. Aliquots were removed, quenched with excess *i*Pr<sub>2</sub>NEt, taken to dryness, reconstituted in DMSO (75 µL) and analyzed by HPLC-UV (254 nm). Product yield and isomer distribution were determined by peak integration relative to starting **18c**. The pseudo-first order rate constant was determined by least-squares fitting of the time-course data to the first-order rate law.

7. Porter, J.; Dykert, J.; Rivier, J. *Int. J. Peptide Protein Res.* **1987**, *30*, 13–21.

8. Rose, T. E.; Lawson, K. V.; Harran, P. G. *Chem. Sci.* **2015**, *6*, 2219–2223

9. Chan, W. C.; White, P. D. *Fmoc Solid Phase Peptide Synthesis: A Practical Approach*, Oxford University Press, Oxford, 2000

10. Lawson, K. V.; Rose, T. E.; Harran, P. G. *Proc. Natl. Acad. Sci. U. S. A.*, **2013**, *110*, E3753.

**Determination of kinetic barriers for 1,2-rearrangement of pyrroloindoline endo-21a and exo-21b**

Purified pyrroloindolines **21a** and **21b** were individually subjected to reactions in 20 vol% TFA solution in MeNO<sub>2</sub>, as for macrocycle **18c**. Reaction temperature was maintained using a heated or cooled water bath, and solutions of substrate in MeNO<sub>2</sub> were pre-incubated before adding TFA, which had also been equilibrated to the reaction temperature. Aliquots (25 μL) were removed periodically, chilled briefly in a dry ice acetone bath, and promptly concentrated *in vacuo*. The resulting dried residues were reconstituted in MeOH containing iPr<sub>2</sub>EtN (0.1 vol%, 300 μL) and analyzed by HPLC-UV. Pseudo-first order rate constants were determined by least-squares fitting of the time-course peak area data (254 nm) to the first-order rate law, and these data were used to construct the corresponding Eyring plots (below) of ln(k/T) versus 1/T. Activation parameters were calculated from  $m = -\Delta H^\ddagger/R$  and  $b = \ln(K_B/h) + \Delta S^\ddagger/R$ .

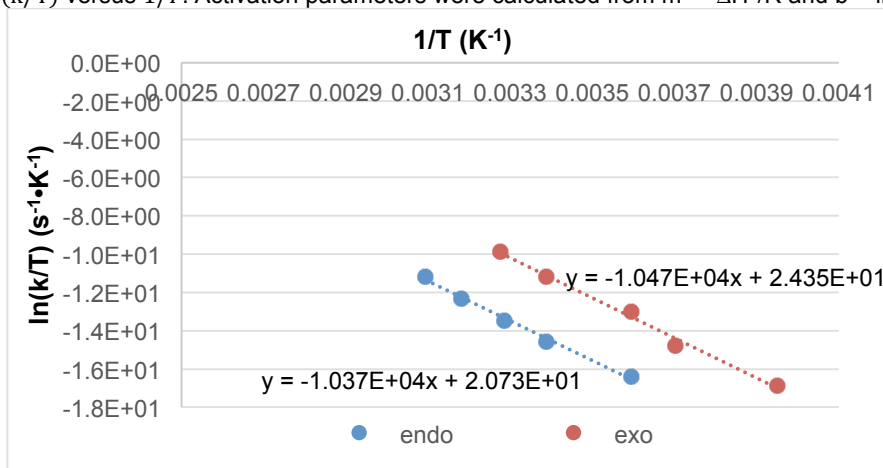

|                                                                | <b>exo-21a</b> | <b>endo-21b</b> |
|----------------------------------------------------------------|----------------|-----------------|
| $\Delta H^\ddagger$ (kcal·mol <sup>-1</sup> )                  | <b>20.8</b>    | <b>20.6</b>     |
| $\Delta S^\ddagger$ (kcal·K <sup>-1</sup> ·mol <sup>-1</sup> ) | <b>1.2E-03</b> | <b>-6.0E-03</b> |
| $\Delta G^\ddagger$ (kcal·mol <sup>-1</sup> )                  | <b>20.5</b>    | <b>22.4</b>     |

## D.1. Acyclic precursors and macrocyclization products

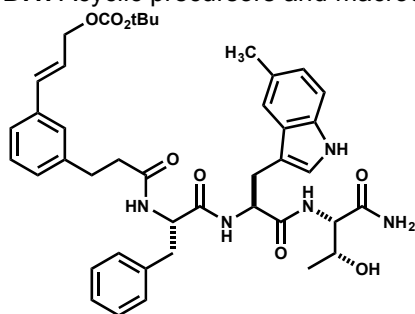

**Acyclic Cinnamyl Carbonate 6:** Synthesized according to Procedure A. After completion of the reaction, the solution was diluted with 100 mL EtOAc and washed 3x50 mL NaHCO<sub>3</sub>, 3x50 mL NH<sub>4</sub>Cl, 1x50 mL brine. Dried with MgSO<sub>4</sub> and concentrated *in vacuo*. Chromatographed on SiO<sub>2</sub> with a gradient from 0% to 5% MeOH in CHCl<sub>3</sub>. White Solid. 81% yield. <sup>1</sup>H NMR (DMSO-*d*<sub>6</sub>, 500 MHz): δ 10.70 (d, *J* = 1.8 Hz, 1H), 8.27 (d, *J* = 7.5 Hz, 1H), 8.09 (d, *J* = 8.2 Hz, 1H), 7.63 (d, *J* = 8.5 Hz, 1H), 7.36 (s, 1H), 7.25 (d, *J* = 7.8 Hz, 1H), 7.21-7.12 (m, 10H), 7.04 (br s, 1H), 6.99 (d, *J* = 7.5 Hz, 1H), 6.88 (dd, *J* = 8.2, 1.1 Hz, 1H), 6.61 (d, *J* = 15.9 Hz, 1H), 6.32 (ddd, *J* = 15.9, 6.3, 6.2 Hz, 1H), 4.90 (d, *J* = 5.4 Hz, 1H), 4.66 (dd, *J* = 6.2, 0.8 Hz, 2H), 4.58 (ddd, *J* = 8.5, 7.5, 4.9 Hz, 1H), 4.52 (ddd, *J* = 10.0, 8.4, 3.9 Hz, 1H), 4.13 (dd, *J* = 8.6, 3.2 Hz, 1H), 4.07-4.04 (m, 1H), 3.18-3.14 (m, 1H), 3.03-2.95 (m, 2H), 2.70 (dd, *J* = 13.9, 10.3 Hz, 1H), 2.62 (apt t, *J* = 7.9 Hz, 2H), 2.38 (s, 3H), 2.45-2.24 (m, 2H), 1.43 (s, 9H), 1.00 (d, *J* = 6.3 Hz, 3H). <sup>13</sup>C NMR (DMSO-*d*<sub>6</sub>, 126 MHz): δ 172.0, 171.6, 171.4, 152.8, 141.7, 137.9, 135.8, 134.4, 133.4, 129.1, 128.6, 127.9, 127.6, 126.6, 126.4, 126.1, 124.1, 123.7, 123.2, 122.5, 118.0, 111.0, 109.3, 81.5, 66.9, 66.4, 57.9, 53.8, 53.7, 37.5, 36.7, 30.9, 27.4, 27.1, 21.3, 19.9. MS *m/z* 753.4 (calc'd: C<sub>42</sub>H<sub>51</sub>N<sub>5</sub>O<sub>8</sub>, [M+H]<sup>+</sup>, 753.4).

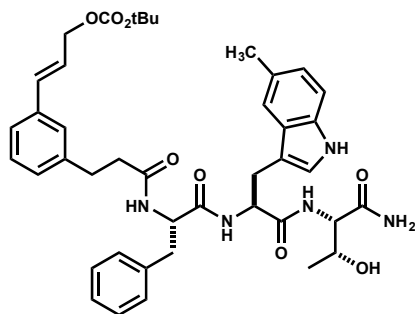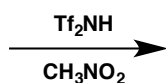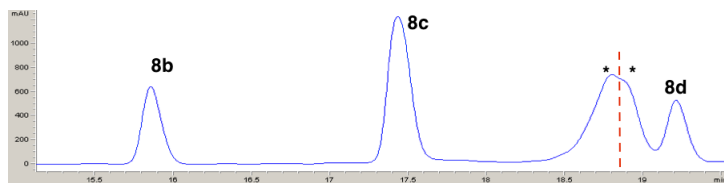

\*Unidentified isomeric products

MS *m/z* 636.6 (calc'd: C<sub>45</sub>H<sub>42</sub>FN<sub>6</sub>O<sub>5</sub>, [M+H]<sup>+</sup>, 636.3).

MS *m/z* 636.6 (calc'd: C<sub>45</sub>H<sub>42</sub>FN<sub>6</sub>O<sub>5</sub>, [M+H]<sup>+</sup>, 636.3).

MS *m/z* 636.6 (calc'd: C<sub>45</sub>H<sub>42</sub>FN<sub>6</sub>O<sub>5</sub>, [M+H]<sup>+</sup>, 636.3).

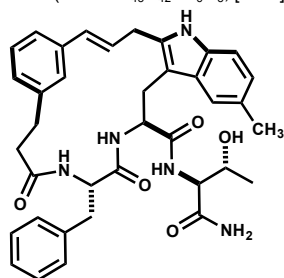

8b

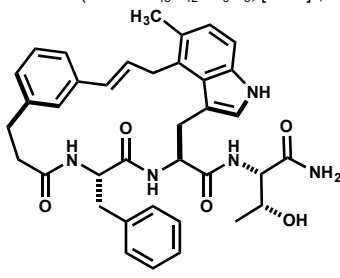

8c

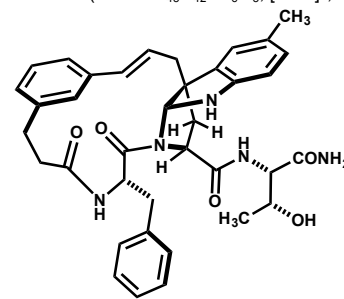

8d

### Analytical HPLC Method

Column: Waters Sunfire™ C<sub>18</sub>,  
4.6x250 mm, 5 μm  
Solvent A: H<sub>2</sub>O + 0.1% TFA  
Solvent B: ACN + 0.1% TFA  
Flow rate: 1.00 mL/min

| Time | %B |
|------|----|
| 0    | 40 |
| 2.5  | 30 |
| 24   | 86 |
| 29   | 30 |

### Preparative HPLC Method

Column: Waters Sunfire™ C<sub>18</sub>,  
19x250 mm, 5 μm  
Solvent A: H<sub>2</sub>O + 0.1% TFA  
Solvent B: ACN + 0.1% TFA  
Flow rate: 18.0 mL/min

| Time | %B |
|------|----|
| 0    | 40 |
| 2    | 40 |
| 30   | 50 |

Macrocyclic Product **8b**

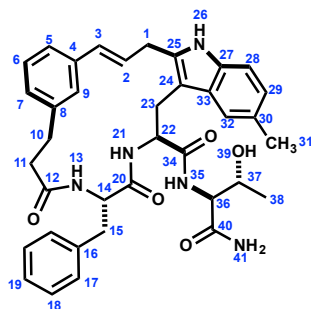

(500 MHz, DMSO-*d*<sub>6</sub>, 298K)

|    | <b>13C</b> | <b>1H</b>                                                                 | <b>key correlation</b>       |
|----|------------|---------------------------------------------------------------------------|------------------------------|
| 1  | 29.8       | 3.56 (dd, J = 15.6, 6.9 Hz, 1H), 3.78 (dd, J = 15.6, 5.9 Hz, 1H)          | HMBC 1->24,25                |
| 2  | 127.8      | 6.08 (apt dt, J = 15.7, 6.8 Hz, 1H)                                       | COSY 2->1, HMBC 2->4         |
| 3  | 130.3      | 6.40 (d, J = 15.7 Hz, 1H)                                                 |                              |
| 4  | 136.6      | -                                                                         |                              |
| 5  | 123.9      | 7.09-7.12 (m, 1H) overlap                                                 |                              |
| 6  | 127.8      | 7.14 (dd, J = 7.4, 7.4 Hz, 1H) overlap                                    |                              |
| 7  | 127.1      | 6.95 (br d, J = 7.4 Hz, 1H)                                               | HMBC 7->5                    |
| 8  | 141.0      | -                                                                         |                              |
| 9  | 124.4      | 6.98-7.00 (m, 1H) overlap                                                 |                              |
| 10 | 30.0       | 2.59-2.65 (m, 1H) overlap, 2.06-2.92 (m, 1H)                              | HMBC 10->8                   |
| 11 | 35.8       | 2.00 (ddd, J = 14.0, 7.7, 3.1 Hz, 1H), 2.37-2.42 (m, 1H) overlap          |                              |
| 12 | 171.0      | -                                                                         |                              |
| 13 | -          | 8.08 (d, J = 8.8 Hz, 1H)                                                  | TOCSY 13->14,15, HMBC 13->12 |
| 14 | 52.5       | 4.79 (ddd, J = 9.4, 9.4, 3.8 Hz, 1H)                                      |                              |
| 15 | 38.2       | 2.61-2.66 (m, 1H) overlap, 2.97-3.02 (m, 1H) overlap                      | HMBC 15->16                  |
| 16 | 137.6      | -                                                                         |                              |
| 17 | 129.1      | 7.17-7.19 (m, 2H) overlap                                                 | HMBC 17->19                  |
| 18 | 127.4      | 7.17-7.20 (m, 2H) overlap                                                 | HMBC 18->16                  |
| 19 | 125.7      | 7.12-7.15 (m, 1H) overlap                                                 | HMBC 19->17                  |
| 20 | 172.0      | -                                                                         |                              |
| 21 | -          | 8.62 (d, J = 7.6 Hz, 1H)                                                  | TOCSY 21->22,23, HMBC 21->20 |
| 22 | 54.2       | 4.67 (ddd, J = 10.6, 7.6, 4.6 Hz, 1H)                                     |                              |
| 23 | 26.0       | 3.02 (dd, J = 14.9, 10.6 Hz, 1H), 3.10 (dd, J = 14.9, 4.6 Hz, 1H) overlap | HMBC 23->24,25               |
| 24 | 105.3      | -                                                                         |                              |
| 25 | 133.9      | -                                                                         |                              |
| 26 | -          | 10.64 (s, 1H)                                                             | HMBC 26->24,25,33            |
| 27 | 133.3      | -                                                                         |                              |
| 28 | 109.9      | 7.11 (d, J = 8.3 Hz, 1H) overlap                                          | HMBC 28->30,33               |
| 29 | 121.6      | 6.83 (dd, J = 8.3, 1.3 Hz, 1H)                                            | HMBC 29->32,31               |
| 30 | 126.3      | -                                                                         |                              |
| 31 | 21.1       | 2.39 (s, 3H)                                                              | HMBC 31->29,30,32            |
| 32 | 117.6      | 7.30 (br s, 1H)                                                           | HMBC 32->29,31               |
| 33 | 129.0      | -                                                                         |                              |
| 34 | 171.9      | -                                                                         |                              |
| 35 | -          | 7.66 (d, J = 8.5 Hz, 1H)                                                  | HMBC 35->34                  |
| 36 | 57.5       | 4.16 (dd, J = 8.5, 3.1 Hz, 1H)                                            | HMBC 36->40                  |
| 37 | 66.0       | 4.08-4.13 (m, 1H) overlap                                                 |                              |
| 38 | 19.7       | 1.08 (d, J = 6.4 Hz, 3H)                                                  | HMBC 38->36,37               |
| 39 | -          | not observed                                                              |                              |
| 40 | 171.8      | -                                                                         |                              |
| 41 | -          | 6.98-7.00 (m, 1H) overlap, 7.10-7.12 (m, 1H) overlap                      | HMBC 41->40, TOCSY 41->41'   |



Macrocyclic Product **8c**

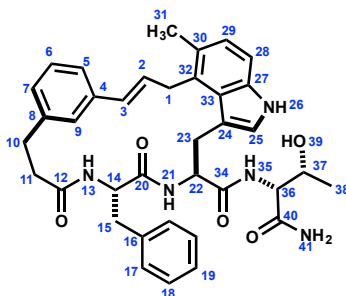

(500 MHz, DMSO-*d*<sub>6</sub>, 298K)

|    | <b>13C</b> | <b>1H</b>                                             | <b>key correlation</b>            |
|----|------------|-------------------------------------------------------|-----------------------------------|
| 1  | 32.0       | 3.82-3.91 (m, 2H)                                     |                                   |
| 2  | 128.9      | 6.37 (dt, J = 16.0, 5.4 Hz, 1H)                       | HMBC 2->4,32, COSY 2->1           |
| 3  | 129.6      | 6.07 (d, J = 16.0 Hz, 1H)                             | HMBC 3->5,9                       |
| 4  | 136.7      | -                                                     |                                   |
| 5  | 123.0      | 7.02 (d, J = 8.0 Hz, 1H)                              |                                   |
| 6  | 127.7      | 7.09 (dd, J = 8.0, 8.0 Hz, 1H) overlap                | HMBC 6->4,8                       |
| 7  | 126.8      | 6.94 (d, J = 8.0 Hz, 1H) overlap                      |                                   |
| 8  | 141.1      | -                                                     |                                   |
| 9  | 125.3      | 7.07 (br s, 1H) overlap                               |                                   |
| 10 | 29.7       | 2.54-2.59 (m, 1H) obscured, 2.91-2.97 (m, 1H) overlap | HMBC 10->7,9,12                   |
| 11 | 35.9       | 2.09-2.15 (m, 1H), 2.33-2.39 (m, 1H) overlap          | HMBC 11->8,12                     |
| 12 | 170.6      | -                                                     |                                   |
| 13 | -          | 7.94 (d, J = 9.1 Hz, 1H)                              | HMBC 13->12                       |
| 14 | 52.5       | 4.80-4.88 (m, 1H)                                     |                                   |
| 15 | 37.9       | 2.66-2.72 (m, 1H), 2.92-2.97 (m, 1H) overlap          | HMBC15->16,17                     |
| 16 | 137.7      | -                                                     |                                   |
| 17 | 128.8      | 7.23-7.24 (m, 2H) overlap                             | HMBC 17->15                       |
| 18 | 127.5      | 7.23-7.25 (m, 2H) overlap                             |                                   |
| 19 | 125.6      | 7.14-7.19 (m, 1H)                                     |                                   |
| 20 | 171.0      | -                                                     |                                   |
| 21 | -          | 8.44-8.48 (m, 1H)                                     | HMBC 21->20                       |
| 22 | 53.4       | 4.63-4.70 (m, 1H)                                     |                                   |
| 23 | 29.5       | 3.14-3.19 (m, 1H), 3.39 (dd, J = 13.9, 9.9 Hz, 1H)    | HMBC 23->24                       |
| 24 | 109.5      | -                                                     |                                   |
| 25 | 123.3      | 7.06-7.08 (m, 1H) overlap                             | HMBC 25->24,27,33                 |
| 26 | -          | 10.66 (br s, 1H)                                      | COSY 26->25, HMBC 26->24,25,27,33 |
| 27 | 135.4      | -                                                     |                                   |
| 28 | 109.2      | 7.12 (d, J = 8.3 Hz, 1H) overlap                      | HMBC 28->30,33                    |
| 29 | 123.6      | 6.91 (d, J = 8.3 Hz, 1H)                              | HMBC 29->27,31,32                 |
| 30 | 125.2      | -                                                     |                                   |
| 31 | 18.4       | 2.34 (s, 3H)                                          | HMBC 31->29,30,32                 |
| 32 | 128.4      | -                                                     |                                   |
| 33 | 126.0      | -                                                     |                                   |
| 34 | 170.7      | -                                                     |                                   |
| 35 | -          | 7.59 (d, J = 8.4 Hz, 1H)                              |                                   |
| 36 | 57.6       | 4.13 (dd, J = 8.4, 3.0 Hz, 1H)                        | HMBC 36->40                       |
| 37 | 65.8       | 4.04-4.09 (m, 1H)                                     |                                   |
| 38 | 19.6       | 1.05 (d, J = 6.2 Hz, 1H)                              | COSY 38->37, HMBC 38->36,37       |
| 39 | -          | not observed                                          |                                   |
| 40 | 171.6      | -                                                     |                                   |
| 41 | -          | 6.87 (br s, 1H), 6.95 (br s, 1H) overlap              |                                   |

Macrocyclic Product **8d**

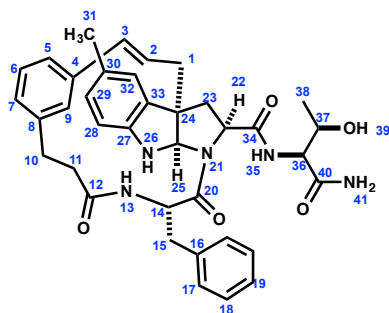

(500 MHz, DMSO-*d*<sub>6</sub>, 298K)

|    | <b>13C</b> | <b>1H</b>                                                        | <b>key correlation</b>          |
|----|------------|------------------------------------------------------------------|---------------------------------|
| 1  | 39.3       | 2.51-2.57 (m, 1H), 2.80 (dd, J = 13.7, 10.0 Hz, 1H)              | HMBC 1->24,25                   |
| 2  | 126.3      | 6.05-6.14 (m, 1H)                                                |                                 |
| 3  | 132.1      | 6.63 (d, J = 15.8 Hz, 1H)                                        | TOCSY 3->2,1 HMBC 3->4          |
| 4  | 136.9      | -                                                                |                                 |
| 5  | 124.3      | 7.04 (br d, J = 7.6 Hz, 1H)                                      | HMBC 5->3,7                     |
| 6  | 128.2      | 7.15 (dd, J = 7.6, 7.6 Hz, 1H)                                   | HMBC 6->4,8                     |
| 7  | 126.8      | 6.99 (br d, J = 7.6 Hz, 1H)                                      | HMBC 7->5                       |
| 8  | 140.5      | -                                                                |                                 |
| 9  | 125.0      | 7.18 (br s, 1H)                                                  |                                 |
| 10 | 30.6       | 2.62-2.69 (m, 1H), 2.82-2.90 (m, 1H)                             |                                 |
| 11 | 37.1       | 2.01-2.08 (m, 1H), 2.32-3.39 (m, 1H)                             | HMBC 11->8 TOCSY 11->10,10',11' |
| 12 | 171.1      | -                                                                |                                 |
| 13 | -          | 7.96 (d, J = 8.8 Hz, 1H)                                         | HMBC 13->12                     |
| 14 | 49.8       | 5.34 (ddd, J = 8.8, 8.8, 4.8 Hz, 1H)                             | HMBC 14->20                     |
| 15 | 38.3       | 2.89 (dd, J = 13.9, 8.8 Hz, 1H), 3.09 (dd, J = 13.9, 4.8 Hz, 1H) | HMBC 15->16,17 TOCSY 14->15,13  |
| 16 | 136.5      | -                                                                |                                 |
| 17 | 129.8      | 7.39 (d, J = 7.4 Hz, 2H)                                         | TOCSY 17->18,19                 |
| 18 | 127.8      | 7.28 (dd, J = 7.4, 7.4 Hz, 2H)                                   | HMBC 18->16                     |
| 19 | 126.0      | 7.20-7.24 (m, 1H)                                                | HMBC 19->17                     |
| 20 | 171.3      | -                                                                |                                 |
| 21 | -          | -                                                                |                                 |
| 22 | 61.6       | 4.43 (dd, J = 10.4, 5.7 Hz, 1H)                                  | HMBC 22->23,24                  |
| 23 | 40.2       | 2.00-2.07 (m, 1H), 2.50-2.57 (m, 1H)                             |                                 |
| 24 | 57.3       | -                                                                |                                 |
| 25 | 81.4       | 6.11 (s, 1H)                                                     | HMBC 25->22,24                  |
| 26 | -          | not detected                                                     |                                 |
| 27 | 144.9      | -                                                                |                                 |
| 28 | 109.9      | 6.45 (d, J = 7.8 Hz, 1H)                                         | HMBC 28->33                     |
| 29 | 128.0      | 6.84 (dd, J = 7.8, 0.9 Hz, 1H)                                   | HMBC 29->32                     |
| 30 | 127.3      | -                                                                |                                 |
| 31 | 20.4       | 2.21 (s, 1H)                                                     | HMBC 31->28,30,32               |
| 32 | 122.0      | 6.91-6.93 (m, 1H)                                                | HMBC 32->27,29                  |
| 33 | 135.5      | -                                                                |                                 |
| 34 | 170.4      | -                                                                |                                 |
| 35 | -          | 7.51 (d, J = 7.8 Hz, 1H)                                         |                                 |
| 36 | 57.2       | 3.84 (dd, J = 7.8, 2.5 Hz, 1H)                                   | HMBC 36->40                     |
| 37 | 65.2       | 3.91-3.97 (m, 1H)                                                | HMBC 37->40                     |
| 38 | 19.3       | 0.78 (d, J = 6.6 Hz, 3H)                                         | COSY 38->37 TOCSY 38->35,36,37  |
| 39 | -          | not detected                                                     |                                 |
| 40 | 171.5      | -                                                                |                                 |
| 41 | -          | 6.68 (br s, 1H), 7.20 (br s, 1H)                                 | HMBC 41->40 TOCSY 41->41'       |

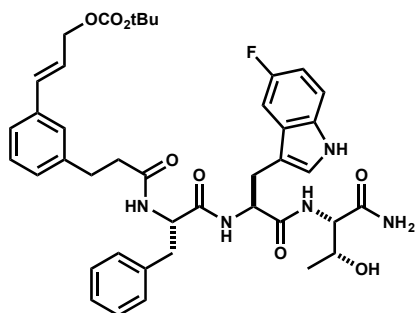

**Acyclic Cinnamyl Carbonate 7:** Synthesized according to Procedure A. Workup and chromatography conditions were the same as for linear precursor **6**. White Solid. 62% yield.  $^1\text{H NMR}$  (DMSO- $d_6$ , 500 MHz):  $\delta$  10.97 (d,  $J = 2.2$  Hz, 1H), 8.29 (d,  $J = 7.8$  Hz, 1H), 8.08 (d,  $J = 8.1$  Hz, 1H), 7.8 (d,  $J = 8.6$  Hz, 1H), 7.41 (dd,  $J = 10.2, 2.4$  Hz, 1H), 7.32 (dd,  $J = 8.8, 4.5$  Hz, 1H), 7.29 (d,  $J = 2.2$  Hz, 1H), 7.26 (br. d,  $J = 7.8$  Hz, 1H), 7.23 (br. s, 1H), 7.21 (br. s, 1H), 7.2 (br. s, 1H), 7.14-7.18 (m, 4H), 7.09 (br. s, 1H), 7.01 (d,  $J = 8.1$  Hz, 1H), 6.9 (ddd,  $J = 9.0, 9.0, 2.3$  Hz, 1H), 6.63 (d,  $J = 15.7$  Hz, 1H), 6.33 (dt,  $J = 15.9, 6.2$  Hz, 1H), 4.67 (dd,  $J = 6.3, 1.1$  Hz, 2H), 4.63 (ddd,  $J = 8.6, 8.0, 4.9$  Hz, 1H), 4.54 (ddd,  $J = 9.9, 8.4, 4.0$  Hz, 1H), 4.16 (dd,  $J = 8.7, 3.2$  Hz, 1H), 4.08 (dddd,  $J = 6.2, 6.2, 6.2, 3.4$  Hz, 1H), 3.17 (dd,  $J = 15.0, 4.6$  Hz, 1H), 3.02 (dd,  $J = 15.3, 9.3$  Hz, 1H), 2.97 (dd,  $J = 13.7, 4.0$  Hz, 1H), 2.71 (dd,  $J = 13.9, 16.0$  Hz, 1H), 2.65 (app t,  $J = 7.9$  Hz, 2H), 2.23-2.38 (m, 2H), 1.4 (s, 9H), 1.02 (d,  $J = 6.4$  Hz, 3H).  $^{13}\text{C NMR}$  (DMSO- $d_6$ , 126 MHz):  $\delta$  172.0, 171.5, 171.4, 171.3, 157.6, 155.8, 152.8, 141.7, 137.9, 135.8, 133.4, 132.7, 129.1, 128.6, 127.9, 127.6, 127.5, 126.4, 126.1, 125.9, 124.1, 123.2, 112.14, 112.06, 110.2, 110.2, 109.0, 108.8, 103.3, 103.1, 81.5, 66.9, 66.3, 58.0, 53.7, 53.5, 37.4, 36.7, 30.9, 27.3, 19.9. MS  $m/z$  758.8 (calc'd:  $\text{C}_{41}\text{H}_{48}\text{FN}_5\text{O}_8$ ,  $[\text{M}+\text{H}]^+$ , 758.4).

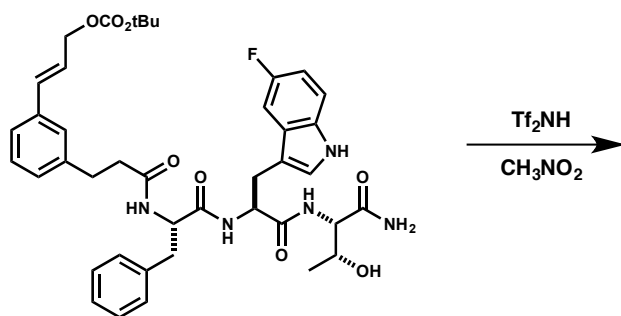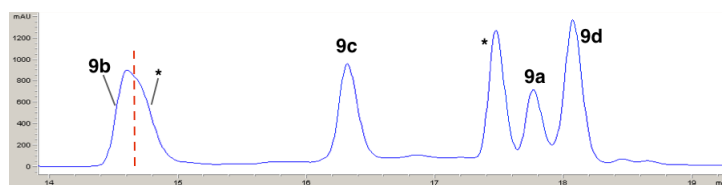

\*Unidentified isomeric products

MS  $m/z$  640.3 (calc'd:  $\text{C}_{45}\text{H}_{42}\text{FN}_6\text{O}_5$ ,  $[\text{M}+\text{H}]^+$ , 640.3).

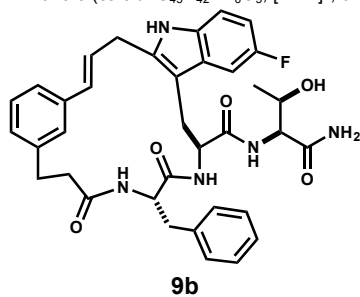

**9b**

MS  $m/z$  640.3 (calc'd:  $\text{C}_{45}\text{H}_{42}\text{FN}_6\text{O}_5$ ,  $[\text{M}+\text{H}]^+$ , 640.3).

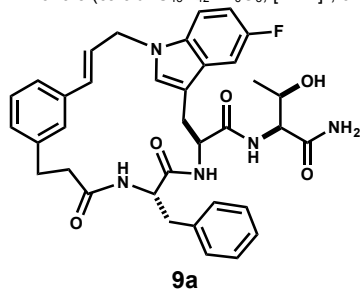

**9a**

MS  $m/z$  640.3 (calc'd:  $\text{C}_{45}\text{H}_{42}\text{FN}_6\text{O}_5$ ,  $[\text{M}+\text{H}]^+$ , 640.3).

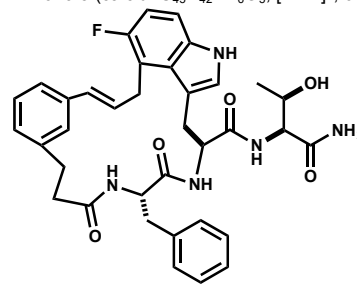

**9c**

MS  $m/z$  640.2 (calc'd:  $\text{C}_{45}\text{H}_{42}\text{FN}_6\text{O}_5$ ,  $[\text{M}+\text{H}]^+$ , 640.3).

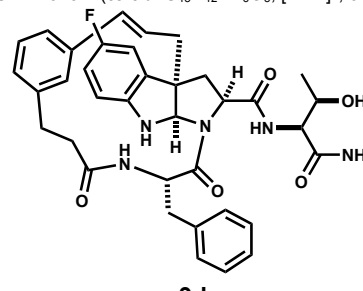

**9d**

**Analytical HPLC Method**

Column: Waters Sunfire™ C<sub>18</sub>,  
4.6x250 mm, 5  $\mu\text{m}$   
Solvent A: H<sub>2</sub>O + 0.1% TFA  
Solvent B: ACN + 0.1% TFA  
Flow rate: 1.00 mL/min

| Time | %B |
|------|----|
| 0    | 30 |
| 2.5  | 30 |
| 24   | 86 |
| 29   | 30 |

**Preparative HPLC Method**

Column: Waters Sunfire™ C<sub>18</sub>,  
19x250 mm, 5  $\mu\text{m}$   
Solvent A: H<sub>2</sub>O + 0.1% TFA  
Solvent B: ACN + 0.1% TFA  
Flow rate: 18.0 mL/min

| Time | %B |
|------|----|
| 0    | 40 |
| 2    | 40 |
| 30   | 60 |

Macrocyclic Product **9b**

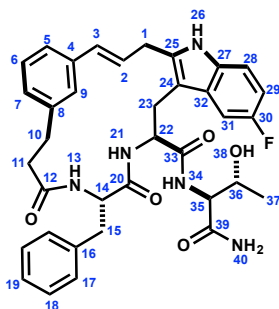

(500 MHz, DMSO-*d*<sub>6</sub>, 298K)

|    | <b>13C</b> | <b>1H</b>                                                                     | <b>key correlation</b>      |
|----|------------|-------------------------------------------------------------------------------|-----------------------------|
| 1  | 46.6       | 4.95 (ddd, J = 16.4, 4.7, 1.6 Hz, 1H), 4.83 (dd, J = 16.4, 6.9 Hz, 1H)        | TOCSY 1->2,3 HMBC 1->2,3,25 |
| 2  | 125.5      | 6.07 (ddd, J = 15.8, 7.1, 4.5 Hz, 1H)                                         | HMBC 2->1,3,4               |
| 3  | 131.0      | 6.22 (br d, J = 15.9 Hz, 1H)                                                  |                             |
| 4  | 135.7      | -                                                                             |                             |
| 5  | 124.7      | 7.11 (m, 1H) overlap                                                          | HMBC 5->9,7                 |
| 6  | 127.8      | 7.15 (m, 1H) overlap                                                          | HMBC 6->4,8                 |
| 7  | 128.2      | 6.96 (m, 1H) overlap                                                          |                             |
| 8  | 142.0      | -                                                                             |                             |
| 9  | 124.5      | 6.92 (m, 1H) overlap                                                          | HMBC 9->7                   |
| 10 | 29.1       | 2.46 (m, 1H) overlap, 2.95 (m, 1H) overlap                                    | HMBC 10->7,8,9,11,12        |
| 11 | 35.5       | 2.08 (ddd, J = 15.1, 7.2, 2.4 Hz, 1H), 2.40 (ddd, J = 15.2, 11.6, 2.3 Hz, 1H) | TOCSY 11->10                |
| 12 | 170.6      | -                                                                             |                             |
| 13 | -          | 7.68 (d, J = 8.5 Hz, 1H)                                                      | HMBC 13->12 TOCSY 13->14,15 |
| 14 | 52.6       | 4.71 (m, 1H) overlap                                                          |                             |
| 15 | 38.9       | 2.70 (dd, J = 13.6, 8.0 Hz, 1H), 3.02 (dd, J = 13.6, 4.1 Hz, 1H)              | HMBC 15->14,16,17,20        |
| 16 | 137.6      | -                                                                             |                             |
| 17 | 129.4      | 7.08 (m, 1H) overlap                                                          | HMBC 17->15                 |
| 18 | 127.8      | 7.15 (m, 1H) overlap                                                          | HMBC 18->16                 |
| 19 | 126.4      | 7.11 (m, 1H) overlap                                                          | HMBC 19->17                 |
| 20 | 170.6      | -                                                                             |                             |
| 21 | -          | 8.60 (d, J = 8.7 Hz, 1H)                                                      | TOCSY 21->22,23 HMBC 21->20 |
| 22 | 52.6       | 4.74 (m, 1H) overlap                                                          | HMBC 22->23                 |
| 23 | 27.2       | 3.10 (br. d, J = 14.8 Hz, 1H), 2.90 (m, 1H) overlap                           | HMBC 23->22,24,25           |
| 24 | 110.8      | -                                                                             |                             |
| 25 | 128.1      | 7.28 (s, 1H)                                                                  | HMBC 25->1,32,38            |
| 26 | -          | -                                                                             |                             |
| 27 | 132.6      | -                                                                             |                             |
| 28 | 110.9      | 7.45 (dd, J = 7.8, 4.5 Hz, 1H)                                                | HMBC 28->32 TOCSY 28->29,31 |
| 29 | 109.2      | 6.94 (m, 1H) overlap                                                          | HMBC 29->27,30              |
| 30 | 157.0      | -                                                                             |                             |
| 31 | 103.8      | 7.51 (dd J = 9.9, 2.4 Hz, 1H)                                                 | HMBC 31->27,30              |
| 32 | 127.8      | -                                                                             |                             |
| 33 | 171.9      | -                                                                             |                             |
| 34 | -          | 7.96 (d, J = 8.8 Hz, 1H)                                                      | TOCSY 34->35,36 HMBC 34->33 |
| 35 | 58.0       | 4.21 (dd, J = 8.8, 3.1 Hz, 1H)                                                | HMBC 35->36                 |
| 36 | 66.4       | 4.10 (m, 1H)                                                                  |                             |
| 37 | 20.0       | 1.07 (d, J = 6.4 Hz, 3H)                                                      | HMBC 37->35,36              |
| 38 | -          | not observed                                                                  |                             |
| 39 | 172.2      | -                                                                             |                             |
| 40 | -          | 7.2 (br. s, 2H)                                                               | HMBC 40->39                 |

Macrocyclic Product 9c

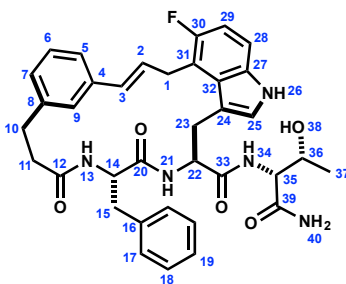

(500 MHz, DMSO-*d*<sub>6</sub>, 298K)

|    | 13C   | 1H                                                                            | key correlation                             |
|----|-------|-------------------------------------------------------------------------------|---------------------------------------------|
| 1  | 30.0  | 3.57 (dd, J = 15.3, 7.2 Hz, 1H), 3.80 (dd, J = 15.3, 6.3 Hz, 1H)              | TOCSY 1->2,3 HMBC 1->2,3,24,25              |
| 2  | 127.6 | 6.07 (dt, J = 15.6, 6.9 Hz, 1H)                                               | HMBC 2->1,4                                 |
| 3  | 131.0 | 6.43 (d, J = 15.9 Hz, 1H)                                                     | HMBC 3->1,4,5,9                             |
| 4  | 136.8 | -                                                                             |                                             |
| 5  | 123.6 | 7.10 (m, 1H) overlap                                                          | HMBC 5->9                                   |
| 6  | 127.9 | 7.13 (m, 1H) overlap                                                          | HMBC 6->4                                   |
| 7  | 124.0 | 7.10 (m, 1H) overlap                                                          | HMBC 7->5,9                                 |
| 8  | 141.2 | -                                                                             |                                             |
| 9  | 125.0 | 6.98 (br. s., 1)                                                              | HMBC 10->8,9 TOCSY 10->11                   |
| 10 | 30.4  | 2.62 (m, 1H) overlap, 2.88 (ddd, J = 13.7, 11.0, 5.6 Hz, 1H)                  | HMBC 11->8,12                               |
| 11 | 35.8  | 1.98 (ddd, J = 14.0, 7.6, 3.1 Hz, 1H), 2.40 (ddd, J = 13.6, 11.0, 2.6 Hz, 1H) |                                             |
| 12 | 171.2 | -                                                                             |                                             |
| 13 | -     | 8.07 (d, J = 8.9 Hz, 1H)                                                      | COSY 13->14 TOCSY 13->14,15,15' HMBC 13->12 |
| 14 | 52.7  | 4.75 (ddd, J = 9.3, 9.5, 3.8 Hz, 1H)                                          | HMBC 14->15                                 |
| 15 | 38.0  | 2.98 (m, 1H) overlap, 2.65 (m, 1H) overlap                                    | HMBC 15->14,16,17                           |
| 16 | 138.1 | -                                                                             |                                             |
| 17 | 129.5 | 7.16 (m, 1H) overlap                                                          | HMBC 17->18                                 |
| 18 | 127.7 | 7.17 (m, 1H) overlap                                                          | HMBC 18->16,17                              |
| 19 | 128.0 | 7.14 (m, 1H) overlap                                                          |                                             |
| 20 | 172.1 | -                                                                             |                                             |
| 21 | -     | 8.59 (d, J = 7.8 Hz, 1H)                                                      | COSY 21->22 TOCSY 21->22,23 HMBC 21->20     |
| 22 | 54.1  | 4.66 (ddd, J = 10.2, 7.6, 5.1 Hz, 1H)                                         | HMBC 22->23                                 |
| 23 | 26.2  | 3.07 (dd, J = 15.1, 5.2 Hz, 1H), 2.97 (m, 1H) overlap                         | HMBC 23->22,24,32                           |
| 24 | 106.4 | -                                                                             |                                             |
| 25 | 136.4 | -                                                                             |                                             |
| 26 | -     | 10.91 (s, 1H)                                                                 | HMBC 26->24,25,27,32                        |
| 27 | 131.8 | -                                                                             |                                             |
| 28 | 111.2 | 7.18 (m, 1H) overlap                                                          | HMBC 28->30 TOCSY 28->29                    |
| 29 | 108.4 | 6.81 (ddd, J = 9.3, 9.3, 2.5 Hz, 1H)                                          | TOCSY 29->28,31 HMBC 29->27,30              |
| 30 | 156.6 | -                                                                             |                                             |
| 31 | 103.4 | 7.24 (dd, J = 10.3, 2.7 Hz, 1H)                                               | HMBC 31->27,30                              |
| 32 | 129.0 | -                                                                             |                                             |
| 33 | 172.1 | -                                                                             |                                             |
| 34 | -     | 7.73 (d, J = 8.7 Hz, 1H)                                                      | HMBC 34->33 TOCSY 34->35,36,37              |
| 35 | 57.8  | 4.13 (dd, J = 8.7, 2.9 Hz, 1H)                                                | HMBC 35->36,39                              |
| 36 | 66.2  | 4.07 (m, 1H)                                                                  |                                             |
| 37 | 19.5  | 1.05 (d, J = 6.4 Hz, 3H)                                                      |                                             |
| 38 | -     | 4.96 (d, J = 4.9 Hz, 1H)                                                      |                                             |
| 39 | 172.0 | -                                                                             |                                             |
| 40 | -     | 6.93 (m, 1H) overlap                                                          | HMBC 40->39                                 |

Macrocyclic Product 9a

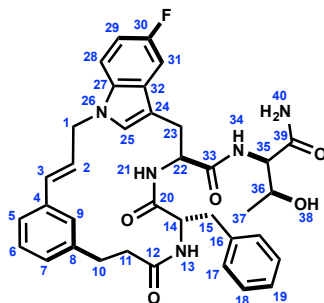

(500 MHz, DMSO-*d*<sub>6</sub>, 298K)

|    | <b>13C</b> | <b>1H</b>                                                      | <b>key correlation</b>          |
|----|------------|----------------------------------------------------------------|---------------------------------|
| 1  | 27.8       | 3.76 (dd, J = 16.6, 5.9 Hz, 1H), 3.90 (br. d, J = 16.0 Hz, 1H) | TOCSY1->2,3 HMBC 1->2,3,31      |
| 2  | 130.0      | 6.07 (d, J = 15.8 Hz, 1H)                                      | HMBC 2->1,31                    |
| 3  | 128.8      | 6.35 (dt, J = 16.0, 5.5 Hz, 1H)                                | HMBC 3->1,5,9,30,32             |
| 4  | 136.5      | -                                                              |                                 |
| 5  | 122.9      | 7.00 (m, 1H) overlap                                           | HMBC 5->9                       |
| 6  | 127.8      | 7.06 (m, 1H) overlap                                           | HMBC 6->4,8                     |
| 7  | 127.1      | 7.06 (m, 1H) overlap                                           | HMBC 7->9                       |
| 8  | 141.3      | -                                                              |                                 |
| 9  | 125.8      | 6.99 (br. s, 1H)                                               | HMBC 9->5,7                     |
| 10 | 29.6       | 2.91 (m, 1H) overlap, 2.52 (m, 1H) overlap                     | HMBC 10->7,8,9,11,12            |
| 11 | 35.7       | 2.32 (app t, 13.5 Hz, 1H), 2.08 (m, 1H) overlap                | HMBC 11->8,12                   |
| 12 | 170.7      | -                                                              |                                 |
| 13 | -          | 8.10 (d, J = 8.9 Hz, 1H)                                       | HMBC 13->12 TOCSY 13->14,15,15' |
| 14 | 52.6       | 4.82 (ddd, J = 9.7, 9.7, 4.1 Hz, 1H)                           | HMBC 14->15                     |
| 15 | 38.0       | 2.89 (m, 1H) overlap, 2.64 (dd, J = 13.3, 10.5 Hz, 1H)         | HMBC 15->14,16,17               |
| 16 | 137.7      | -                                                              |                                 |
| 17 | 128.8      | 7.21 (m, 1H) overlap                                           |                                 |
| 18 | 127.6      | 7.21 (m, 1H) overlap                                           |                                 |
| 19 | 127.6      | 7.15 (m, 1H) overlap                                           | HMBC 19->17                     |
| 20 | 171.1      | -                                                              |                                 |
| 21 | -          | 8.62 (d, J = 6.6 Hz, 1H)                                       | HMBC 21->20 TOCSY 21->22,23     |
| 22 | 53.2       | 4.66 (m, 1H)                                                   |                                 |
| 23 | 29.1       | 3.30 (m, 1H) overlap, 3.06 (br. d, J = 13.4 Hz, 1H)            | HMBC 23->22,24                  |
| 24 | 110.6      | -                                                              | HMBC 25->27                     |
| 25 | 125.8      | 7.13 (m, 1H) overlap                                           | HMBC 26->24,25,27               |
| 26 | -          | 10.96 (br. s, 1H)                                              |                                 |
| 27 | 133.0      | -                                                              |                                 |
| 28 | 110.0      | 7.18 (m, 1H) overlap                                           |                                 |
| 29 | 108.8      | 6.89 (m, 1H) overlap                                           | HMBC 29->27,30,31               |
| 30 | 154.5      | -                                                              |                                 |
| 31 | 115.6      | -                                                              |                                 |
| 32 | 125.8      | -                                                              |                                 |
| 33 | 170.7      | -                                                              |                                 |
| 34 | -          | 7.74 (d, J = 8.3 Hz, 1H)                                       | HMBC 34->33 TOCSY 34->35,36,37  |
| 35 | 57.8       | 4.08 (dd, J = 8.7, 3.0 Hz, 1H)                                 |                                 |
| 36 | 65.8       | 4.02 (m, 1H)                                                   |                                 |
| 37 | 19.8       | 0.99 (d, J = 6.4 Hz, 3H)                                       | HMBC 37->35,36                  |
| 38 | -          | 4.9 (d, J = 5.1 Hz, 1H)                                        | HMBC 38->35,36,37               |
| 39 | 171.7      | -                                                              |                                 |
| 40 | -          | 7.03 (m, 1H) overlap                                           | HMBC 40->39                     |

Macrocyclic Product **9d**

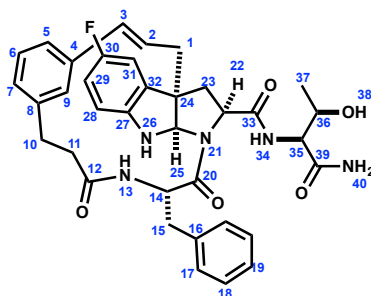

(500 MHz, DMSO-*d*<sub>6</sub>, 298K)

|    | <b>13C</b>                           | <b>1H</b>                                                                     | <b>key correlation</b>         |
|----|--------------------------------------|-------------------------------------------------------------------------------|--------------------------------|
| 1  | 39.0                                 | 2.51-2.57 (m, 1H), 2.79-2.85 (m, 1H)                                          | HMBC 1->24                     |
| 2  | 125.0                                | 6.09 (ddd, J = 15.8, 9.7, 6.2 Hz, 1H)                                         | TOCSY 2->3,1                   |
| 3  | 132.6                                | 6.62 (d, J = 15.8 Hz, 1H)                                                     | HMBC 3->4                      |
| 4  | 136.9                                | -                                                                             |                                |
| 5  | 124.2                                | 7.05 (br d, J = 8.5 Hz, 1H)                                                   | HMBC 5->9,7                    |
| 6  | 127.9                                | 7.15 (dd, J = 8.5, 7.4 Hz, 1H)                                                | HMBC 6->4,8                    |
| 7  | 127.0                                | 6.99 (br d, J = 7.4 Hz, 1H)                                                   |                                |
| 8  | 140.5                                | -                                                                             |                                |
| 9  | 124.9                                | 7.18 (br s, 1H)                                                               | HMBC 9->3                      |
| 10 | 30.9                                 | 2.62-2.67 (m, 1H), 2.85-2.90 (m, 1H)                                          |                                |
| 11 | 37.4                                 | 2.05 (ddd, J = 13.5, 6.9, 3.8 Hz, 1H), 2.35 (ddd, J = 13.5, 10.8, 3.1 Hz, 1H) |                                |
| 12 | 171.4                                | -                                                                             |                                |
| 13 | -                                    | 7.96 (d, J = 8.8 Hz, 1H)                                                      | HMBC 13->12                    |
| 14 | 50.1                                 | 5.33 (ddd, J = 8.9, 8.8, 4.8 Hz, 1H)                                          | HMBC 14->20                    |
| 15 | 38.6                                 | 2.82-2.87 (m, 1H), 3.08 (dd, J = 14.0, 4.8 Hz, 1H)                            | HMBC 15->16,17 TOCSY 15->14,13 |
| 16 | 136.7                                | -                                                                             |                                |
| 17 | 129.9                                | 7.38 (d, J = 7.4 Hz, 2H)                                                      | HMBC 17->19                    |
| 18 | 127.8                                | 7.27 (dd, J = 7.4, 7.4 Hz, 2H)                                                | HMBC 18->16                    |
| 19 | 126.1                                | 7.20-7.23 (m, 1H)                                                             | HMBC 18->17                    |
| 20 | 171.2                                | -                                                                             |                                |
| 21 | -                                    | -                                                                             |                                |
| 22 | 61.5                                 | 4.48 (dd, J = 10.3, 5.5 Hz, 1H)                                               | HMBC 22->24 COSY 22->23        |
| 23 | 40.0                                 | 2.10 (dd, J = 13.6, 5.5 Hz, 1H), 2.51-2.55 (m, 1H)                            | HMBC 23->24                    |
| 24 | 57.6                                 | -                                                                             |                                |
| 25 | 81.6                                 | 6.16 (br s, 1H)                                                               | COSY 25->26 HMBC 25->27        |
| 26 | -                                    | 6.32 (br s, 1H)                                                               |                                |
| 27 | 143.8                                | -                                                                             |                                |
| 28 | 110.5                                | 6.51 (dd, J <sub>HH</sub> = 8.6 Hz, J <sub>HF</sub> = 4.6 Hz, 1H)             | HMBC 28->30,32                 |
| 29 | 113.7                                | 6.84 (ddd, J <sub>HF</sub> = 9.0 Hz, J <sub>HH</sub> = 8.6, 2.7 Hz, 1H)       | HMBC 29->27,30                 |
| 30 | 156.8 (d, J <sub>C-F</sub> ≈ 240 Hz) | -                                                                             |                                |
| 31 | 109.3                                | 7.02 (dd, J <sub>HF</sub> = 8.4 Hz, J <sub>HH</sub> = 2.7 Hz, 1H)             | HMBC 31->27,30                 |
| 32 | 136.9                                | -                                                                             |                                |
| 33 | 170.4                                | -                                                                             |                                |
| 34 | -                                    | 7.49 (d, J = 8.0 Hz, 1H)                                                      | HMBC 34->33                    |
| 35 | 57.5                                 | 3.86 (ddd, J = 8.0, 2.6 Hz, 1H)                                               | HMBC 35->39                    |
| 36 | 65.6                                 | 3.90-3.96 (m, 1H)                                                             |                                |
| 37 | 19.4                                 | 0.77 (d, J = 6.6 Hz, 3H)                                                      | COSY 37->36 TOCSY 37->36,35,34 |
| 38 | -                                    | not detected                                                                  |                                |
| 39 | 171.5                                | -                                                                             |                                |
| 40 | -                                    | 6.73 (br s, 1H), 7.19 (br s, 1H)                                              | TOCSY 40->40'                  |

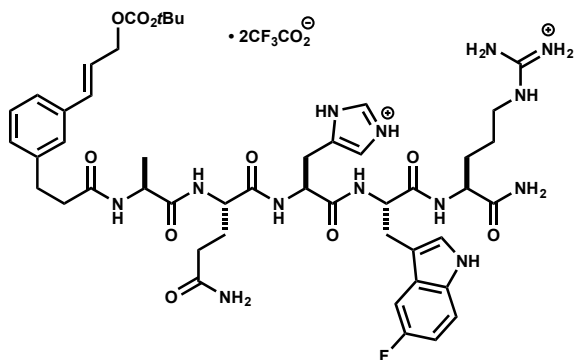

**Acyclic Cinnamyl Carbonate 10:** Synthesized according to Procedure B. White Powder.  $^1H$  NMR (DMSO- $d_6$ , 500 MHz):  $\delta$  10.98 (d,  $J = 2.3$  Hz, 1H), 8.96 (d,  $J = 1.2$  Hz, 1H), 8.24 (d,  $J = 7.9$  Hz, 1H), 8.06-8.16 (m, 4H), 7.74 (t,  $J = 5.7$  Hz, 1H), 7.39 (dd,  $J = 16.0, 2.5$  Hz, 1H), 7.36 (br. s, 1H), 7.23-7.34 (m, 7H), 7.09-7.14 (m, 2H), 6.87-6.93 (m, 2H), 6.65 (d,  $J = 15.9$  Hz, 1H), 6.35 (dt,  $J = 16.0, 6.2$  Hz, 1H), 4.68 (dd,  $J = 6.5, 1.0$  Hz, 2H), 4.52-4.60 (m, 2H), 4.18-4.28 (m, 2H), 4.16 (ddd,  $J = 7.9, 5.6$  Hz, 1H), 3.03-3.17 (m, 4H), 2.94 (dd,  $J = 15.9, 15.9, 9$  Hz, 2H), 2.75-2.84 (m, 2H), 2.39-4.29 (m, 2H), 2.04-2.17 (m, 2H), 1.80-1.91 (m, 1H), 1.65-1.79 (m, 2H), 1.45-1.55 (m, 2H), 1.43 (s, 9H), 1.15 (d,  $J = 7$  Hz, 3H).  $^{13}C$  NMR (DMSO- $d_6$ , 126 MHz):  $\delta$  174.1, 173.1, 172.7, 171.6, 171.4, 171.3, 169.8, 157.6, 156.8, 155.8, 152.8, 141.7, 135.8, 133.7, 133.4, 132.7, 129.3, 129.1, 128.6, 128.0, 127.5, 127.4, 126.4, 125.9, 124.2, 123.3, 117.7, 116.8, 115.3, 115.2, 112.2, 112.1, 109.9, 109.9, 81.5, 66.9, 55.0, 53.4, 52.4, 52.2, 51.5, 48.3, 36.6, 31.3, 30.8, 29.1, 27.3, 25.0, 17.9. MS  $m/z$  1002.7 (calc'd:  $C_{48}H_{64}N_{13}O_{10}$ ,  $[M+H]^+$ , 1002.5).

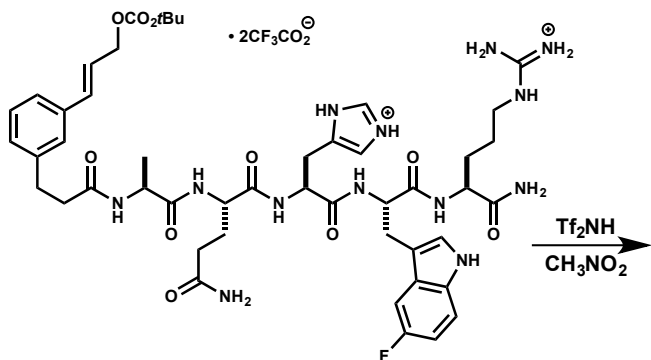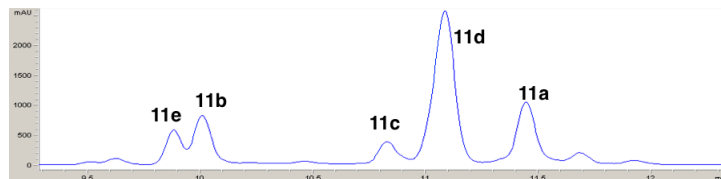

MS  $m/z$  884.4 (calc'd:  $C_{45}H_{42}FN_6O_5$ ,  $[M+H]^+$ , 884.4).

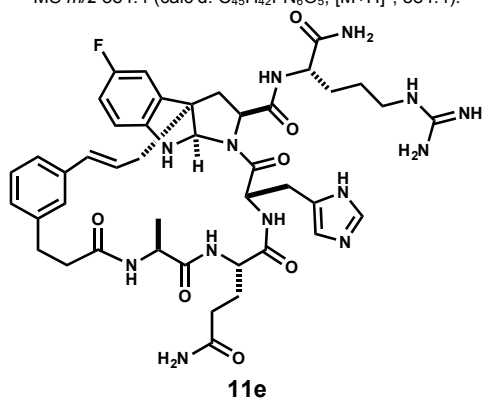

MS  $m/z$  884.4 (calc'd:  $C_{45}H_{42}FN_6O_5$ ,  $[M+H]^+$ , 884.4).

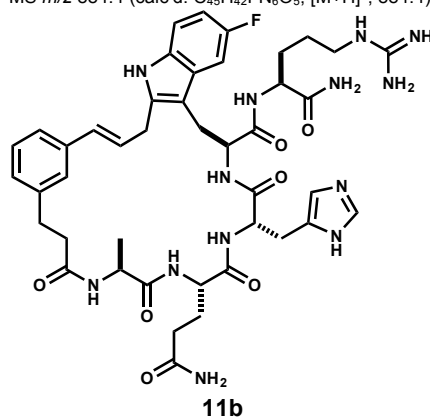



MS *m/z* 884.4 (calc'd: C<sub>45</sub>H<sub>42</sub>FN<sub>6</sub>O<sub>5</sub>, [M+H]<sup>+</sup>, 884.4).

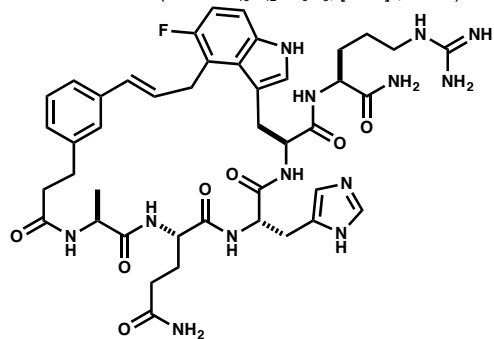

**11c**

MS *m/z* 884.4 (calc'd: C<sub>45</sub>H<sub>42</sub>FN<sub>6</sub>O<sub>5</sub>, [M+H]<sup>+</sup>, 884.4).

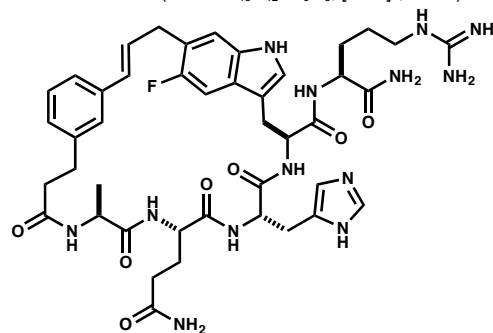

**11d**

MS *m/z* 884.4 (calc'd: C<sub>45</sub>H<sub>42</sub>FN<sub>6</sub>O<sub>5</sub>, [M+H]<sup>+</sup>, 884.4).

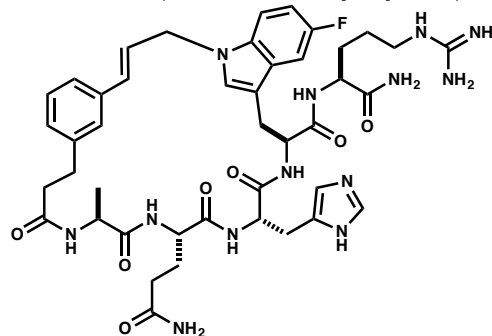

**11a**

**Analytical HPLC Method**

Column: Waters Sunfire™  
C<sub>18</sub>, 4.6x250 mm, 5 μm  
Solvent A: H<sub>2</sub>O + 0.1% TFA  
Solvent B: ACN + 0.1% TFA  
Flow rate: 1.00 mL/min

| Time | %B |
|------|----|
| 0    | 10 |
| 0.5  | 10 |
| 2    | 25 |
| 17   | 64 |

Preparative HPLC method A:  
Column: Waters XBridge™ C<sub>18</sub>,  
19x250mm, 5μm.  
Solvent A: H<sub>2</sub>O + 0.1%v TFA  
Solvent B: ACN + 0.1%v TFA  
Flow rate: 18.00 ml/min

| Time | %B  |
|------|-----|
| 0    | 30  |
| 2    | 30  |
| 30   | 100 |

Preparative HPLC  
method B:  
Same as A  
Repurification of  
**11a, 11c, & 11d**

| Time | %B |
|------|----|
| 0    | 30 |
| 2    | 30 |
| 30   | 55 |

Macrocyclic Product 11e

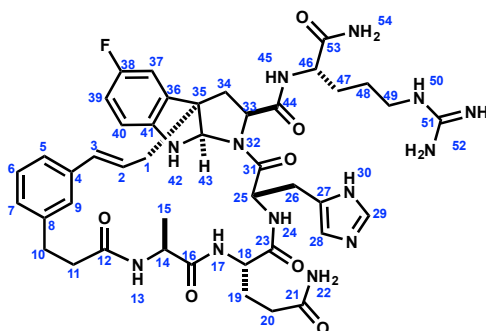

(500 MHz, DMSO-*d*<sub>6</sub>, 298K)

|    | <b>13C</b>           | <b>1H</b>                                                        | <b>key correlations</b> |
|----|----------------------|------------------------------------------------------------------|-------------------------|
| 1  | 47.1                 | 4.83 (dd, J = 15.5, 6.4 Hz, 1H), 4.99 (dd, J = 15.5, 5.7 Hz, 1H) | HMBC 1->41,43           |
| 2  | 125.4                | 6.37 (ddd, J = 15.7, 6.4, 5.7 Hz, 1H)                            | HMBC 2->4               |
| 3  | 131.9                | 6.65 (br d, J = 15.7 Hz, 1H)                                     | TOCSY 3->2,1            |
| 4  | 135.9                | -                                                                |                         |
| 5  | 125.1                | 7.15-7.20 (m, 1H) overlap                                        |                         |
| 6  | 128.5                | 7.19-7.24 (m, 1H) overlap                                        | HMBC 6->4,8             |
| 7  | 127.8                | 7.09 (br d, J = 7.1 Hz, 1H)                                      |                         |
| 8  | 141.6                | -                                                                |                         |
| 9  | 125.6                | 7.25 (br s, 1H) overlap                                          |                         |
| 10 | 30.7                 | 2.73-2.86 (m, 2H)                                                | HMBC 10->8,12           |
| 11 | 36.3                 | 2.36-2.51 (m, 2H)                                                | HMBC 11->8,12           |
| 12 | 172.6                | -                                                                |                         |
| 13 | -                    | 8.24 (d, J = 6.4 Hz, 1H)                                         | HMBC 13->12             |
| 14 | 49.6                 | 7.94-7.98 (m, 1H)                                                | HMBC 14->16             |
| 15 | 17.3                 | 1.14 (d, J = 7.2 Hz, 3H)                                         | TOCSY 15->14,13         |
| 16 | 173.2                | -                                                                |                         |
| 17 | -                    | 7.81-7.88 (m, 1H)                                                | HMBC 17->16             |
| 18 | 49.6                 | 4.08-4.16 (m, 1H)                                                |                         |
| 19 | 27.4                 | 1.65-1.74 (m, 1H), 1.79-1.87 (m, 1H)                             | HMBC 19->21             |
| 20 | 31                   | 1.95-2.11 (m, 2H)                                                | HMBC 20->21             |
| 21 | 174.1                | -                                                                |                         |
| 22 | -                    | 6.81 (br s, 1H), 7.30 (br s, 1H)                                 | HMBC 22->21             |
| 23 | 171.9                | -                                                                |                         |
| 24 | -                    | 8.12 (d, J = 7.6 Hz, 1H)                                         | HMBC 24->23             |
| 25 | 51.4                 | 4.55-4.62 (m, 1H) overlap                                        | HMBC 25->31             |
| 26 | 26.8                 | 2.92-3.01 (m, 1H) overlap, 3.06-3.12 (m, 1H)                     |                         |
| 27 | 129.6                | -                                                                |                         |
| 28 | 116.9                | 7.25 (s, 1H) overlap                                             | HMBC 28->29             |
| 29 | 134.1                | 8.95 (br s, 1H)                                                  | HMBC 29->27,28          |
| 30 | -                    | Not detected                                                     |                         |
| 31 | 170.7                | -                                                                |                         |
| 32 | -                    | 8.02 (d, J = 7.2 Hz, 1H)                                         | HMBC 32->31             |
| 33 | 53.3                 | 4.52-4.59 (m, 1H)                                                | HMBC 33->34             |
| 34 | 27.3                 | 2.92-3.01 (m, 1H) overlap, 3.12-3.22 (m, 1H)                     | HMBC 34->33,35          |
| 35 | 109.9                | -                                                                |                         |
| 36 | 128                  | -                                                                |                         |
| 37 | 103.9                | 7.45 (dd, JHF = 9.9 Hz, JHH = 2.3 Hz, 1H)                        | HMBC 37->41             |
| 38 | 157.1 (d, J = 220Hz) | -                                                                |                         |
| 39 | 109.4                | 6.98 (ddd, JHF = 9.1 Hz, JHH = 9.1, 2.3 Hz, 1H)                  | HMBC 39->41             |
| 40 | 111.1                | 7.48 (dd, JHH = 9.1 Hz, JHF = 4.5 Hz, 1H)                        | HMBC 40->36             |
| 41 | 132.8                | -                                                                |                         |
| 42 | -                    | -                                                                |                         |
| 43 | 128.5                | 7.28 (s, 1H)                                                     | HMBC 43->1              |
| 44 | 171.9                | -                                                                |                         |
| 45 | -                    | 8.22 (d, J = 8.1 Hz, 1H)                                         |                         |
| 46 | 52.2                 | 4.19-4.28 (m, 1H)                                                | HMBC 46->53             |
| 47 | 29.1                 | 1.54-1.64 (m, 1H), 1.69-1.79 (m, 1H)                             |                         |
| 48 | 25                   | 1.43-1.57 (m, 2H)                                                |                         |
| 49 | 40.5                 | 3.08-3.15 (m, 2H) overlap                                        | HMBC 49->51             |
| 50 | -                    | 7.61 (t, J = 5.1 Hz, 1H)                                         |                         |
| 51 | 156.9                | -                                                                |                         |
| 52 | -                    | 14.03-14.44 (m, 3H)                                              |                         |
| 53 | 173.4                | -                                                                |                         |
| 54 | -                    | 7.15 (br s, 1H), 7.31 (br s, 1H)                                 | HMBC 54->53             |

Macrocyclic Product **11b**

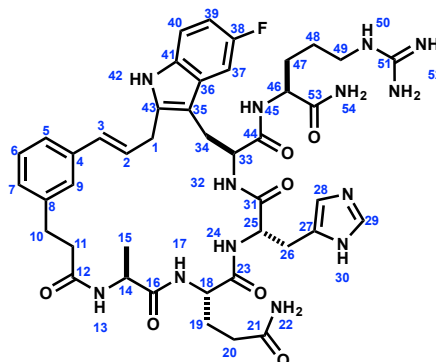

(500 MHz, DMSO-*d*<sub>6</sub>, 298K)

|    | <b>13C</b>            | <b>1H</b>                                                        | <b>key correlations</b>              |
|----|-----------------------|------------------------------------------------------------------|--------------------------------------|
| 1  | 32.4                  | 3.52 (dd, J = 15.3, 5.6 Hz, 1H), 3.64 (dd, J = 15.3, 6.3 Hz, 1H) | HMBC 1->38,39,40                     |
| 2  | 129.3                 | 6.39 (ddd, J = 15.8, 6.3, 5.6 Hz, 1H)                            | TOCSY 2->1,2 HMBC 2->4               |
| 3  | 129.9                 | 6.30 (br d, J = 15.8 Hz, 1H)                                     | HMBC 3->4                            |
| 4  | 137                   | -                                                                |                                      |
| 5  | 124.1                 | 7.13-7.17 (m, 1H) overlap                                        | HMBC 5->7,9                          |
| 6  | 128.3                 | 7.15-7.19 (m, 1H) overlap                                        | HMBC 6->4,8                          |
| 7  | 127.3                 | 7.10 (br d, J = 7.2 Hz, 1H)                                      | HMBC 7->9                            |
| 8  | 141.1                 | -                                                                |                                      |
| 9  | 124.5                 | 7.10 (br s, 1H) overlap                                          | HMBC 9->7                            |
| 10 | 30.2                  | 2.69-2.76 (m, 1H), 2.77-2.82 (m, 1H) overlap                     | HMBC 10->7,8,9,12                    |
| 11 | 35.4                  | 2.31 (ddd, J = 14.3, 6.5, 6.5 Hz, 1H), 2.44-2.51 (m, 1H) overlap | HMBC 11->8,12                        |
| 12 | 171.4                 | -                                                                |                                      |
| 13 | -                     | 8.07 (d, J = 7.6 Hz, 1H)                                         | HMBC 13->12                          |
| 14 | 47.7                  | 4.12 (qd, J = 7.6, 7.1 Hz, 1H)                                   | HMBC 14->15,16                       |
| 15 | 17.6                  | 0.85 (d, J = 7.1 Hz, 3H)                                         | HMBC 15->15,16                       |
| 16 | 172.3                 | -                                                                |                                      |
| 17 | -                     | 7.86 (d, J = 7.7 Hz, 1H)                                         | HMBC 17->16                          |
| 18 | 52.3                  | 3.98 (ddd, J = 8.0, 7.8, 5.4 Hz, 1H)                             | TOCSY 18->17,18,20 HMBC 18->19,20,23 |
| 19 | 27.3                  | 1.50-1.58 (m, 1H) overlap, 1.70-1.81 (m, 1H) overlap             | HMBC 19->20,21                       |
| 20 | 30.9                  | 1.91-2.00 (m, 2H)                                                | HMBC 20->21                          |
| 21 | 173.9                 | -                                                                |                                      |
| 22 | -                     | 6.78 (br s, 1H), 7.22 (br s, 1H) overlap                         | TOCSY 22->22'                        |
| 23 | 171.2                 | -                                                                |                                      |
| 24 | -                     | 7.56 (br d, J = 6.8 Hz, 1H)                                      | HMBC 24->23                          |
| 25 | 50.7                  | 4.45 (ddd, J = 7.2, 6.8, 5.8 Hz, 1H)                             | COSY 25->24                          |
| 26 | 27.6                  | 2.93 (dd, J = 15.3, 7.6 Hz, 1H), 3.05-3.12 (m, 1H) overlap       | HMBC 26->27                          |
| 27 | 128.9                 | -                                                                |                                      |
| 28 | 116.8                 | 7.28 (s, 1H)                                                     | HMBC 28->27,30                       |
| 29 | -                     | not observed                                                     |                                      |
| 30 | 134                   | 8.95 (br s, 1H)                                                  | HMBC 30->27,28                       |
| 31 | 170                   | -                                                                |                                      |
| 32 | -                     | 8.07 (d, J = 7.4 Hz, 1H)                                         | HMBC 32->31                          |
| 33 | 53.7                  | 4.60 (ddd, J = 10.9, 7.4, 3.3 Hz, 1H)                            | TOCSY 33->32,34                      |
| 34 | 27.7                  | 2.85 (dd, J = 14.4, 11.1 Hz, 1H), 3.13-3.20 (m, 1H) overlap      | HMBC 34->33,35                       |
| 35 | 109.8                 | -                                                                |                                      |
| 36 | 133                   | -                                                                |                                      |
| 37 | 103.8                 | 7.57 (d, JHF = 11.1 Hz, 1H)                                      | HMBC 37->35,41,38,39                 |
| 38 | 155.3 (d, J = 230 Hz) | -                                                                |                                      |
| 39 | 120.1                 | -                                                                |                                      |
| 40 | 112.8                 | 7.21 (d, JHF = 6.4 Hz, 1H)                                       | HMBC 40->38                          |
| 41 | 133                   | -                                                                |                                      |
| 42 | -                     | 10.83 (d, J = 1.3 Hz, 1H)                                        | HMBC 42->35,36,41                    |
| 43 | 125.7                 | 7.17-7.19 (m, 1H) overlap                                        |                                      |
| 44 | 172.2                 | -                                                                |                                      |
| 45 | -                     | 8.70 (br d, J = 7.8 Hz, 1H)                                      | HMBC 45->44                          |
| 46 | 52.2                  | 4.25 (ddd, J = 7.8, 7.8, 6.1 Hz, 1H)                             | TOCSY 46->45,47,48,49                |
| 47 | 28.9                  | 1.55-1.63 (m, 1H) overlap, 1.71-1.78 (m, 1H) overlap             | HMBC 47->46                          |
| 48 | 25.1                  | 1.47-1.57 (m, 2H) overlap                                        | HMBC 48->49                          |
| 49 | 40.3                  | 3.09-3.16 (m, 2H) overlap                                        | HMBC 49->47,48,51                    |
| 50 | -                     | 14.17 (br s) overlap                                             |                                      |
| 51 | 156.9                 | -                                                                |                                      |
| 52 | -                     | 14.17 (br s) overlap                                             |                                      |
| 53 | 173.3                 | -                                                                |                                      |
| 54 | -                     | 7.14 (br s, 1H), 7.39 (br s, 1H)                                 | TOCSY 54'->54                        |

Macrocyclic Product **11c**

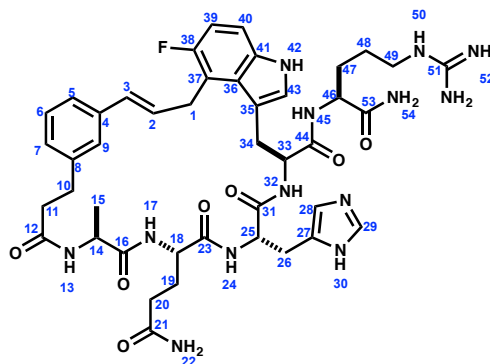

(500 MHz, DMSO-*d*<sub>6</sub>, 298K)

|    | <b>13C</b> | <b>1H</b>                                                                    | <b>key correlations</b>              |
|----|------------|------------------------------------------------------------------------------|--------------------------------------|
| 1  | 27.3       | 3.80-3.91 (m, 2H)                                                            | HMBC 1->2,3,37                       |
| 2  | 129.2      | 6.44 (dt, J = 15.8, 6.0 Hz, 1H)                                              | HMBC 2->4,37                         |
| 3  | 129.9      | 6.20 (br d, J = 15.8 Hz, 1H)                                                 | HMBC 3->5,9 TOCSY 3->2,1             |
| 4  | 136.9      | -                                                                            |                                      |
| 5  | 124.4      | 6.99-7.02 (m, 1H) overlap                                                    |                                      |
| 6  | 128.1      | 7.13 (dd J = 7.6, 7.6 Hz, 1H)                                                | HMBC 6->4,8                          |
| 7  | 127.5      | 6.99-7.02 (m, 1H) overlap                                                    |                                      |
| 8  | 141.4      | -                                                                            |                                      |
| 9  | 125.7      | 7.35 (br s, 1H)                                                              | HMBC 9->3,5,7                        |
| 10 | 30.4       | 2.76-2.87 (m, 2H)                                                            | HMBC 10->8,12                        |
| 11 | 35.9       | 2.44 (ddd, J = 14.6, 5.7, 5.7 Hz, 1H), 2.56 (ddd, J = 14.6, 9.3, 5.8 Hz, 1H) | HMBC 11->8,12                        |
| 12 | 172.6      | -                                                                            |                                      |
| 13 | -          | 8.11 (d, J = 6.0 Hz, 1H)                                                     | HMBC 13->12                          |
| 14 | 49.3       | 3.97-4.03 (m, 1H)                                                            | HMBC 14->16                          |
| 15 | 17.3       | 1.09 (d, J = 7.2 Hz, 3H)                                                     | HMBC 15->14 TOCSY 15->14,13          |
| 16 | 173.2      | -                                                                            |                                      |
| 17 | -          | 8.01 (d, J = 7.5 Hz, 1H)                                                     |                                      |
| 18 | 53         | 4.00-4.06 (m, 1H) overlap                                                    | HMBC 18->23                          |
| 19 | 26.8       | 1.62-1.70 (m, 1H) overlap, 1.73-1.82 (m, 1H) overlap                         | HMBC 19->21,23                       |
| 20 | 30.9       | 1.95-2.03 (m, 1H), 2.04-2.11 (m, 1H)                                         | HMBC 20->21                          |
| 21 | 174.1      | -                                                                            |                                      |
| 22 | -          | 6.87(br s, 1H), 7.30 (br s, 1H) overlap                                      |                                      |
| 23 | 171.9      | -                                                                            |                                      |
| 24 | -          | 8.27 (d, J = 7.9 Hz, 1H)                                                     | HMBC 24->23                          |
| 25 | 51.5       | 4.60 (ddd, J = 9.3, 7.9, 5.1 Hz, 1H)                                         | HMBC 25->31                          |
| 26 | 26.2       | 3.03-3.09 (m, 1H) overlap, 3.22-3.27 (m, 1H)                                 | HMBC 26->27,31                       |
| 27 | 129.7      | -                                                                            |                                      |
| 28 | 116.3      | 7.30 (s, 1H) overlap                                                         | HMBC 28->29 TOCSY 28->29             |
| 29 | 134.1      | 8.97 (br s, 1H)                                                              |                                      |
| 30 | -          | Not observed                                                                 |                                      |
| 31 | 169.7      | -                                                                            |                                      |
| 32 | -          | 7.92 (d, J = 7.9 Hz, 1H)                                                     | HMBC 32->31                          |
| 33 | 54.3       | 4.71 (ddd, J = 8.7, 7.9, 5.6 Hz, 1H)                                         | HMBC 33->44                          |
| 34 | 29.3       | 3.02-3.07 (m, 1H), 3.29 (dd, J = 14.8, 5.3 Hz, 1H)                           | HMBC 34->44                          |
| 35 | 110.4      | -                                                                            |                                      |
| 36 | 125.7      | -                                                                            |                                      |
| 37 | 116.2      | -                                                                            |                                      |
| 38 | 154.9      | -                                                                            |                                      |
| 39 | 109.3      | 6.92 (dd, JHF = 9.7Hz, JHH = 8.9 Hz, 1H)                                     | HMBC 39->37,41                       |
| 40 | 110.7      | 7.21 (dd, JHH = 8.9 Hz, JHF = 4.4 Hz, 1H)                                    | HMBC 40->36                          |
| 41 | 133.4      | -                                                                            |                                      |
| 42 | -          | 10.95 (d, J = 2.4 Hz, 1H)                                                    | TOCSY 42->43 HMBC 42->41             |
| 43 | 125.9      | 7.13 (d, J = 2.4 Hz, 1H)                                                     |                                      |
| 44 | 170.7      | -                                                                            |                                      |
| 45 | -          | 8.01 (d, J = 7.5 Hz, 1H)                                                     | TOCSY 45->46,47,48,49,50 HMBC 45->44 |
| 46 | 51.9       | 4.14 (ddd, J = 8.1, 7.5, 6.0 Hz, 1H)                                         | HMBC 46->53                          |
| 47 | 28.3       | 1.44-1.53 (m, 1H), 1.62-1.70 (m, 1H)                                         |                                      |
| 48 | 24.4       | 1.36-1.45 (m, 2H)                                                            |                                      |
| 49 | 40.2       | 3.03-3.09 (m, 2H) overlap                                                    | HMBC 49->47,51                       |
| 50 | -          | 7.47 (t, J = 5.5 Hz, 1H)                                                     |                                      |
| 51 | 156.6      | -                                                                            |                                      |
| 52 | -          | 13.95-14.37 (m, 3H)                                                          |                                      |
| 53 | 173        | -                                                                            |                                      |
| 54 | -          | 6.92 (br s, 1H) overlap, 6.99 (br s, 1H) overlap                             | TOCSY 54'->54                        |

Macrocyclic Product **11d**

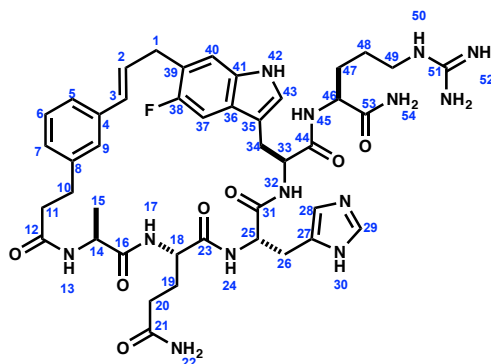

(500 MHz, DMSO-*d*<sub>6</sub>, 298K)

|    | <b>13C</b>            | <b>1H</b>                                                        | <b>key correlations</b>              |
|----|-----------------------|------------------------------------------------------------------|--------------------------------------|
| 1  | 32.4                  | 3.52 (dd, J = 15.3, 5.6 Hz, 1H), 3.64 (dd, J = 15.3, 6.3 Hz, 1H) | HMBC 1->38,39,40                     |
| 2  | 129.3                 | 6.39 (ddd, J = 15.8, 6.3, 5.6 Hz, 1H)                            | TOCSY 2->1,2 HMBC 2->4               |
| 3  | 129.9                 | 6.30 (br d, J = 15.8 Hz, 1H)                                     | HMBC 3->4                            |
| 4  | 137                   | -                                                                |                                      |
| 5  | 124.1                 | 7.13-7.17 (m, 1H) overlap                                        | HMBC 5->7,9                          |
| 6  | 128.3                 | 7.15-7.19 (m, 1H) overlap                                        | HMBC 6->4,8                          |
| 7  | 127.3                 | 7.10 (br d, J = 7.2 Hz, 1H)                                      | HMBC 7->9                            |
| 8  | 141.1                 | -                                                                |                                      |
| 9  | 124.5                 | 7.10 (br s, 1H) overlap                                          | HMBC 9->7                            |
| 10 | 30.2                  | 2.69-2.76 (m, 1H), 2.77-2.82 (m, 1H) overlap                     | HMBC 10->7,8,9,12                    |
| 11 | 35.4                  | 2.31 (ddd, J = 14.3, 6.5, 6.5 Hz, 1H), 2.44-2.51 (m, 1H) overlap | HMBC 11->8,12                        |
| 12 | 171.4                 | -                                                                |                                      |
| 13 | -                     | 8.07 (d, J = 7.6 Hz, 1H)                                         | HMBC 13->12                          |
| 14 | 47.7                  | 4.12 (qd, J = 7.6, 7.1 Hz, 1H)                                   | HMBC 14->15,16                       |
| 15 | 17.6                  | 0.85 (d, J = 7.1 Hz, 3H)                                         | HMBC 15->15,16                       |
| 16 | 172.3                 | -                                                                |                                      |
| 17 | -                     | 7.86 (d, J = 7.7 Hz, 1H)                                         | HMBC 17->16                          |
| 18 | 52.3                  | 3.98 (ddd, J = 8.0, 7.8, 5.4 Hz, 1H)                             | TOCSY 18->17,18,20 HMBC 18->19,20,23 |
| 19 | 27.3                  | 1.50-1.58 (m, 1H) overlap, 1.70-1.81 (m, 1H) overlap             | HMBC 19->20,21                       |
| 20 | 30.9                  | 1.91-2.00 (m, 2H)                                                | HMBC 20->21                          |
| 21 | 173.9                 | -                                                                |                                      |
| 22 | -                     | 6.78 (br s, 1H), 7.22 (br s, 1H) overlap                         | TOCSY 22->22'                        |
| 23 | 171.2                 | -                                                                |                                      |
| 24 | -                     | 7.56 (br d, J = 6.8 Hz, 1H)                                      | HMBC 24->23                          |
| 25 | 50.7                  | 4.45 (ddd, J = 7.2, 6.8, 5.8 Hz, 1H)                             | COSY 25->24                          |
| 26 | 27.6                  | 2.93 (dd, J = 15.3, 7.6 Hz, 1H), 3.05-3.12 (m, 1H) overlap       | HMBC 26->27                          |
| 27 | 128.9                 | -                                                                |                                      |
| 28 | 116.8                 | 7.28 (s, 1H)                                                     | HMBC 28->27,30                       |
| 29 | -                     | not observed                                                     |                                      |
| 30 | 134                   | 8.95 (br s, 1H)                                                  | HMBC 30->27,28                       |
| 31 | 170                   | -                                                                |                                      |
| 32 | -                     | 8.07 (d, J = 7.4 Hz, 1H)                                         | HMBC 32->31                          |
| 33 | 53.7                  | 4.60 (ddd, J = 10.9, 7.4, 3.3 Hz, 1H)                            | TOCSY 33->32,34                      |
| 34 | 27.7                  | 2.85 (dd, J = 14.4, 11.1 Hz, 1H), 3.13-3.20 (m, 1H) overlap      | HMBC 34->33,35                       |
| 35 | 109.8                 | -                                                                |                                      |
| 36 | 133                   | -                                                                |                                      |
| 37 | 103.8                 | 7.57 (d, JHF = 11.1 Hz, 1H)                                      | HMBC 37->35,41,38,39                 |
| 38 | 155.3 (d, J = 230 Hz) | -                                                                |                                      |
| 39 | 120.1                 | -                                                                |                                      |
| 40 | 112.8                 | 7.21 (d, JHF = 6.4 Hz, 1H)                                       | HMBC 40->38                          |
| 41 | 133                   | -                                                                |                                      |
| 42 | -                     | 10.83 (d, J = 1.3 Hz, 1H)                                        | HMBC 42->35,36,41                    |
| 43 | 125.7                 | 7.17-7.19 (m, 1H) overlap                                        |                                      |
| 44 | 172.2                 | -                                                                |                                      |
| 45 | -                     | 8.70 (br d, J = 7.8 Hz, 1H)                                      | HMBC 45->44                          |
| 46 | 52.2                  | 4.25 (ddd, J = 7.8, 7.8, 6.1 Hz, 1H)                             | TOCSY 46->45,47,48,49                |
| 47 | 28.9                  | 1.55-1.63 (m, 1H) overlap, 1.71-1.78 (m, 1H) overlap             | HMBC 47->46                          |
| 48 | 25.1                  | 1.47-1.57 (m, 2H) overlap                                        | HMBC 48->49                          |
| 49 | 40.3                  | 3.09-3.16 (m, 2H) overlap                                        | HMBC 49->47,48,51                    |
| 50 | -                     | 14.17 (br s) overlap                                             |                                      |
| 51 | 156.9                 | -                                                                |                                      |
| 52 | -                     | 14.17 (br s) overlap                                             |                                      |
| 53 | 173.3                 | -                                                                |                                      |
| 54 | -                     | 7.14 (br s, 1H), 7.39 (br s, 1H)                                 | TOCSY 54'->54                        |

Macrocyclic Product 11a

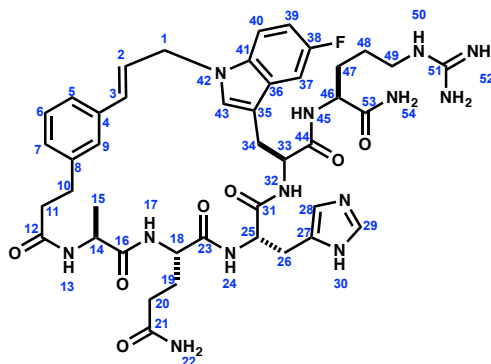

(500 & 600 MHz, DMSO-*d*<sub>6</sub>, 298K)

|    | <b>13C</b>            | <b>1H</b>                                                                    | <b>key correlations</b>                    |
|----|-----------------------|------------------------------------------------------------------------------|--------------------------------------------|
| 1  | 40.7                  | 2.44 (dd, J = 14.3, 8.8 Hz, 1H), 2.68-2.73 (m, 1H)                           | HMBC 1->35,43                              |
| 2  | 124.2                 | 5.91 (ddd, J = 15.7, 8.8, 6.5 Hz, 1H)                                        | COSY 2->1                                  |
| 3  | 134.2                 | 6.55 (d, J = 15.7 Hz, 1H)                                                    | HMBC 3->1,4,5,9                            |
| 4  | 136.7                 | -                                                                            |                                            |
| 5  | 122.2                 | 7.04-7.07 (m, 1H) overlap                                                    |                                            |
| 6  | 128.1                 | 7.11-7.16 (m, 1H) overlap                                                    | HMBC 6->4,8                                |
| 7  | 127.1                 | 7.03-7.07 (m, 1H) overlap                                                    |                                            |
| 8  | 141.3                 | -                                                                            |                                            |
| 9  | 126.2                 | 7.13 (br s, 1H) overlap                                                      | HMBC 9->5,7                                |
| 10 | 28.7                  | 2.71-2.79 (m, 1H), 2.95-3.01 (m, 1H)                                         | HMBC 10->8,12                              |
| 11 | 34.3                  | 2.51-2.57 (m, 1H), 2.59-2.66 (m, 1H)                                         | HMBC 11->8,12                              |
| 12 | 171.3                 | -                                                                            |                                            |
| 13 | -                     | 8.09 (d, J = 8.1 Hz, 1H)                                                     |                                            |
| 14 | 48.3                  | 4.13-4.19 (m, 1H) overlap                                                    | HMBC 14->16                                |
| 15 | 17.6                  | 1.20 (d, J = 7.3 Hz, 3H)                                                     | HMBC 15->14,16 COSY 15->14 TOCSY 15->14,13 |
| 16 | 171.8                 | -                                                                            |                                            |
| 17 | -                     | 7.00-7.03 (m, 1H) overlap                                                    | HMBC 17->16                                |
| 18 | 50.6                  | 4.19 (ddd, J = 8.1, 7.8, 5.4 Hz, 1H)                                         | HMBC 18->19,20                             |
| 19 | 28.4                  | 1.59-1.70 (m, 1H), 1.70-1.80 (m, 1H)                                         |                                            |
| 20 | 31                    | 1.99 (ddd, J = 15.5, 9.5, 5.8 Hz, 1H), 2.08 (ddd, J = 15.5, 9.9, 5.7 Hz, 1H) | HMBC 20->21                                |
| 21 | 173.5                 | -                                                                            |                                            |
| 22 | -                     | 6.84 (br s, 1H), 7.31 (br s, 1H)                                             | HMBC 22->21                                |
| 23 | 171                   | -                                                                            |                                            |
| 24 | -                     | 8.77 (d, J = 8.1 Hz, 1H)                                                     | TOCSY 24->25,26 HMBC 24->23                |
| 25 | 48.3                  | 5.07 (ddd, J = 9.7, 8.1, 5.2 Hz, 1H)                                         | HMBC 25->31                                |
| 26 | 25.6                  | 3.17 (dd, J = 15.9, 5.1 Hz, 1H), 3.00 (dd, J = 15.9, 9.7 Hz, 1H)             | HMBC 26->27,28,31                          |
| 27 | 128.3                 | -                                                                            |                                            |
| 28 | 117.3                 | 7.50 (s, 1H)                                                                 | HMBC 28->27,29                             |
| 29 | 133.5                 | 8.99 (s, 1H)                                                                 | HMBC 29->27,28 TOCSY 29->28                |
| 30 | -                     | Not detected                                                                 |                                            |
| 31 | 170.2                 | -                                                                            |                                            |
| 32 | -                     | -                                                                            |                                            |
| 33 | 60.1                  | 4.62 (dd, J = 9.3, 4.5 Hz, 1H)                                               | TOCSY 33->34 HMBC 33->1,34,35,44           |
| 34 | 40                    | 2.21 (dd, J = 13.3, 4.5 Hz, 1H), 2.46-2.52 (m, 1H) overlap                   | HMBC 34->35                                |
| 35 | 57.8                  | -                                                                            |                                            |
| 36 | 135                   | -                                                                            |                                            |
| 37 | 109.8                 | 7.10-7.14 (m, 1H)                                                            | HMBC 37->38,41                             |
| 38 | 156.5 (d, J = 230 Hz) | -                                                                            |                                            |
| 39 | 114                   | 6.81-6.88 (m, 1H) overlap                                                    | HMBC 39->38,41                             |
| 40 | 109.8                 | 6.84 (dd, J <sub>HH</sub> = 9.1 Hz, J <sub>HF</sub> = 2.6 Hz, 1H)            | HMBC 40->36,38 COSY 40->39                 |
| 41 | 144.8                 | -                                                                            |                                            |
| 42 | -                     | Not detected                                                                 |                                            |
| 43 | 80.3                  | 6.19 (s, 1H)                                                                 |                                            |
| 44 | 169.9                 | -                                                                            |                                            |
| 45 | -                     | 7.56 (d, J = 8.2 Hz, 1H)                                                     | HMBC 45->44                                |
| 46 | 50.6                  | 4.04 (ddd, J = 8.2, 8.0, 6.0 Hz, 1H)                                         | COSY 46->47 HMBC 46->44,54                 |
| 47 | 29.9                  | 0.97-1.06 (m, 1H) overlap, 1.33-1.42 (m, 1H) overlap                         | HMBC 47->49                                |
| 48 | 24.4                  | 1.00-1.11 (m, 1H) overlap, 1.36-1.46 (m, 1H) overlap                         |                                            |
| 49 | 39.8                  | 2.89-2.97 (m, 1H) overlap, 3.03-3.11 (m, 1H)                                 | HMBC 49->51                                |
| 50 | -                     | 7.42 (apt t, J = 5.6 Hz, 1H)                                                 |                                            |
| 51 | 156.3                 | -                                                                            |                                            |
| 52 | -                     | 14.11 (br s, 3H)                                                             |                                            |
| 53 | 172.4                 | -                                                                            |                                            |
| 54 | -                     | 7.08 (br s, 1H), 7.40 (br s, 1H)                                             | HMBC 55'->54 TOCSY 55'->55                 |

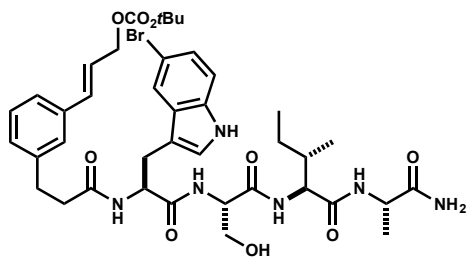

**Acyclic Cinnamyl Carbonate 12:** Synthesized according to Procedure A with 0.41 mmol starting template. Purified via trituration with 3x5 mL methanol. Beige Solid. 170 mg (0.202 mmol) 49% yield.  $^1\text{H-NMR}$  (500 MHz,  $\text{DMSO-d}_6$ )  $\delta$  10.99 (d,  $J = 1.9$  Hz, 1 H), 8.28 (d,  $J = 7.6$  Hz, 1 H), 8.09 (d,  $J = 8.4$  Hz, 1 H), 7.91 (d,  $J = 7.5$  Hz, 1 H), 7.86 (d,  $J = 1.4$  Hz, 1 H), 7.79 (d,  $J = 8.2$  Hz, 1 H), 6.60 (d,  $J = 16.00$  Hz, 1 H), 6.32 (dd,  $J = 15.9, 6.3, 6.3$  Hz, 1 H), 5.08 (dd,  $J = 5.3, 5.3$  Hz, 1 H), 4.66 (d,  $J = 5.95$  Hz, 1 H), 4.60 (ddd,  $J = 9.0, 4.3, 4.3$  Hz, 1 H), 4.39 (dd,  $J = 13.3, 6.1$  Hz, 1 H), 4.22-4.17 (m, 2H), 3.67-3.55 (m, 2H), 3.09 (dd,  $J = 14.5, 3.8$  Hz, 1 H), 3.09 (dd,  $J = 14.5, 3.8$  Hz, 1 H), 2.85 (dd,  $J = 15.6, 9.9$  Hz, 1 H), 2.68-2.57 (m, 2H), 2.32 (dd,  $J = 8.0, 8.0$  Hz, 1 H), 1.81-1.76 (m, 1H), 1.43 (s, 9H), 1.20 (d,  $J = 7.2$  Hz, 3 H), 1.17-1.12 (m, 1H), 1.10-1.04 (m, 1H), 0.86 (d,  $J = 6.7$  Hz, 3 H), 0.82 (dd,  $J = 7.4, 7.4$  Hz, 3 H).  $^{13}\text{C-NMR}$  (126 MHz,  $\text{d}_6\text{-DMSO}$ )  $\delta$  174.1, 171.9, 171.3, 170.3, 170.2, 152.8, 141.7, 135.8, 134.7, 133.4, 129.3, 128.6, 127.9, 126.4, 126.0, 125.7, 124.2, 123.3, 123.2, 121.0, 113.2, 111.0, 110.1, 81.5, 66.9, 61.5, 57.1, 54.9, 53.2, 48.0, 36.9, 36.7, 31.0, 27.4, 24.1, 18.1, 15.4, 11.4. MS  $m/z$   $[\text{M-OCO}_2\text{tBu}]^+$ , 841.3 (calc'd:  $\text{C}_{35}\text{H}_{44}\text{BrN}_6\text{O}_6$   $[\text{M}+\text{H}]^+$ , 841.1)

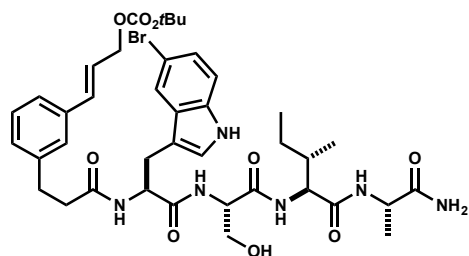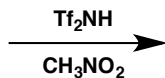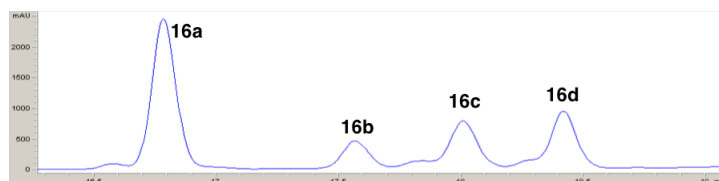

MS  $m/z$  723.2 (calc'd:  $\text{C}_{45}\text{H}_{42}\text{FN}_6\text{O}_5$ ,  $[\text{M}+\text{H}]^+$ , 723.2).

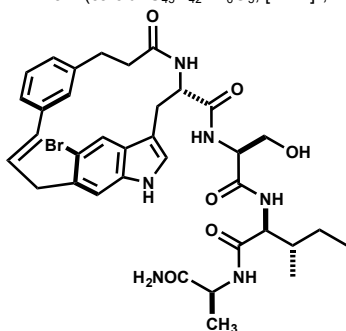

**16a**

MS  $m/z$  723.2 (calc'd:  $\text{C}_{45}\text{H}_{42}\text{FN}_6\text{O}_5$ ,  $[\text{M}+\text{H}]^+$ , 723.2).

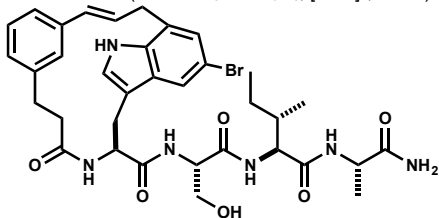

**16d**

MS  $m/z$  723.2 (calc'd:  $\text{C}_{45}\text{H}_{42}\text{FN}_6\text{O}_5$ ,  $[\text{M}+\text{H}]^+$ , 723.2).

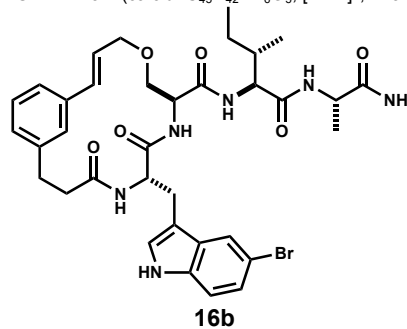

**16b**

MS  $m/z$  723.3 (calc'd:  $\text{C}_{45}\text{H}_{42}\text{FN}_6\text{O}_5$ ,  $[\text{M}+\text{H}]^+$ , 723.2).

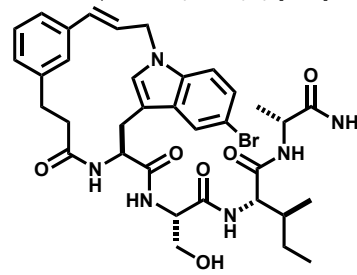

**16e**

**Analytical HPLC Method**

Column: Waters Sunfire™  
 $\text{C}_{18}$ , 4.6x250 mm, 5  $\mu\text{m}$   
 Solvent A:  $\text{H}_2\text{O} + 0.1\%$  TFA  
 Solvent B: ACN + 0.1% TFA  
 Flow rate: 1.00 mL/min

| Time | %B |
|------|----|
| 0    | 30 |
| 2.5  | 30 |
| 24   | 86 |
| 29   | 30 |

**Preparative HPLC Method**

Column: Waters Sunfire™  
 $\text{C}_{18}$ , 19x250 mm, 5  $\mu\text{m}$   
 Solvent A:  $\text{H}_2\text{O} + 0.1\%$  TFA  
 Solvent B: ACN + 0.1% TFA  
 Flow rate: 18.0 mL/min

| Time | %B  |
|------|-----|
| 0    | 45  |
| 2    | 45  |
| 12   | 50  |
| 13   | 50  |
| 15   | 100 |

**Semi-Prep HPLC Method**

Column: Waters XSelect™  
 $\text{C}_{18}$ , 10x250 mm, 5  $\mu\text{m}$   
 Solvent A:  $\text{H}_2\text{O} + 0.1\%$  TFA  
 Solvent B: ACN + 0.1% TFA  
 Flow rate: 6.00 mL/min

| Time | %B |
|------|----|
| 0    | 45 |
| 1    | 45 |
| 4    | 50 |
| 10   | 54 |
| 12   | 45 |

Macrocyclic Product 16a

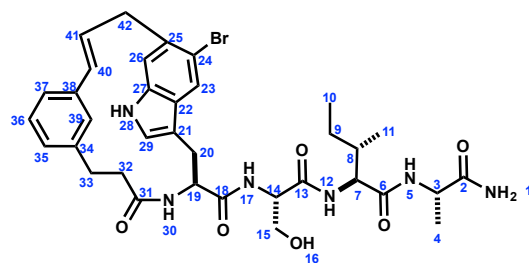

(600 MHz, DMSO-d<sub>6</sub>, 298K)

| 13C | 1H        | key correlation                                                                   |                             |
|-----|-----------|-----------------------------------------------------------------------------------|-----------------------------|
| 1   | -         | 7.12 ppm (br s) (1H); 6.99 ppm (br s) (1H)                                        | HMBC 1 -> 2 / TOCSY 1 -> 1' |
| 2   | 173.9 ppm | -                                                                                 | HMBC 3 -> 2                 |
| 3   | 47.7 ppm  | 4.21-4.18 ppm (m) (1H)                                                            | COSY 5 -> 3                 |
| 4   | 17.9 ppm  | 1.22 ppm (d) J=7.2 Hz (3H)                                                        | COSY 3 -> 4                 |
| 5   | -         | 7.90 ppm (d) J=7.5 Hz (1H)                                                        | HMBC 5 -> 6                 |
| 6   | 170.1 ppm | -                                                                                 | HMBC 7 -> 6                 |
| 7   | 56.9 ppm  | 4.23-4.21 ppm (m) (1H)                                                            | COSY/HMBC 12 -> 7           |
| 8   | 36.4 ppm  | 1.83-1.78 ppm (m) (1H)                                                            | COSY 7 -> 8                 |
| 9   | 23.8 ppm  | 1.46-1.42 ppm (m) (1H); 1.18-1.11 ppm (m) (1H)                                    | COSY 8 -> 9                 |
| 10  | 11.1 ppm  | 0.83 ppm (t) J=7.4 Hz (3H)                                                        | COSY 9 -> 10                |
| 11  | 15.0 ppm  | 0.87 ppm (d) J=6.8 Hz (3H)                                                        | COSY 8 -> 11                |
| 12  | -         | 7.74 ppm (d) J=8.1 Hz (1H)                                                        | HMBC 12 -> 13               |
| 13  | 170.5 ppm | -                                                                                 | HMBC 14 -> 13               |
| 14  | 54.6 ppm  | 4.42 ppm (q) J=6.5 Hz (1H)                                                        | COSY 17 -> 14               |
| 15  | 61.3 ppm  | 3.69 ppm (dd) J=10.3, 5.9 Hz (1H); 3.62 ppm (dd) J=10.5, 6.4 Hz (1H)              | COSY 14 -> 15               |
| 16  | -         | Not Observed                                                                      | -                           |
| 17  | -         | 8.51 ppm (d) J=7.6 Hz (1H)                                                        | HMBC 17 -> 18               |
| 18  | 172.7 ppm | -                                                                                 | HMBC 19 -> 18               |
| 19  | 52.6 ppm  | 4.76 ppm (ddd) J=12.8, 6.2, 4.6 Hz (1H)                                           | COSY 30 -> 19               |
| 20  | 27.7 ppm  | 3.32 ppm (dd) J=14.3, 3.8 Hz (1H); 2.81 ppm (t) J=13.7 Hz (1H)                    | COSY 19 -> 20               |
| 21  | 109.1 ppm | -                                                                                 | HMBC 20, 28, 29 -> 21       |
| 22  | 126.6 ppm | -                                                                                 | HMBC 26, 29 -> 22           |
| 23  | 122.6 ppm | 8.19 ppm (s) (1H)                                                                 | HMBC 23 -> 21               |
| 24  | 116.2 ppm | -                                                                                 | HMBC 23, 26 -> 24           |
| 25  | 131.6 ppm | -                                                                                 | HMBC 23, 42 -> 25           |
| 26  | 115.4 ppm | 7.33 ppm (s) (1H)                                                                 | TOCSY 23 -> 26              |
| 27  | 136.5 ppm | -                                                                                 | HMBC 23, 28, 29 -> 27       |
| 28  | -         | 10.93 ppm (d) J=1.7 Hz (1H)                                                       |                             |
| 29  | 126.5 ppm | 7.23 ppm (d) J= 1.7 Hz (1H)                                                       | COSY/TOCSY 28 -> 29         |
| 30  | -         | 7.52 ppm (d) J=6.4 Hz (1H)                                                        | HMBC 30 -> 31               |
| 31  | 171.7 ppm | -                                                                                 | HMBC 32, 33 -> 31           |
| 32  | 31.3 ppm  | 2.25 ppm (ddd) J=16.9, 5.6, 1.9 Hz (1H); 2.15 ppm (ddd) J=16.9, 12.7, 1.8 Hz (1H) | COSY/TOCSY 33 -> 32         |
| 33  | 25.9 ppm  | 3.02 ppm (dd) J=16.5, 12.6 Hz (1H); 2.45 ppm (dd) J=16.4, 5.6 Hz (1H)             | HMBC 33 -> 35, 39           |
| 34  | 141.0 ppm | -                                                                                 | HMBC 32, 33, 36 -> 34       |
| 35  | 126.4 ppm | 6.83 ppm (d) J=7.4 Hz (1H)                                                        | TOCSY 37 -> 35              |
| 36  | 127.6 ppm | 7.05 ppm (t) J=7.7 Hz (1H)                                                        | COSY/TOCSY 37 -> 36         |
| 37  | 119.2 ppm | 7.17 ppm (d) J=7.7 Hz (1H)                                                        | HMBC 37 -> 40, 41 (slight)  |
| 38  | 135.2 ppm | -                                                                                 | HMBC 36 -> 38               |
| 39  | 128.0 ppm | 5.52 ppm (s)                                                                      | TOCSY 37 -> 39              |
| 40  | 132.1 ppm | 3.70 ppm (d) J=16.0 Hz (1H)                                                       |                             |
| 41  | 127.9 ppm | 6.30 ppm (dt) J=16.2, 3.9 Hz (1H)                                                 |                             |
| 42  | 37.7 ppm  | 3.79 ppm (ddd) J= 17.0, 4.6, 1.5 Hz (1H); 3.43 ppm (dt) J=16.7, 2.3 Hz (1H)       | COSY 41 -> 42               |



Macrocyclic Product **16b**

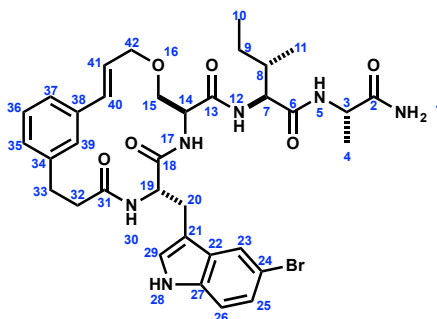

(600 MHz, DMSO-*d*<sub>6</sub>, 298K)

|    | <b>13C</b> | <b>1H</b>                                                                   | <b>key correlation</b>                   |
|----|------------|-----------------------------------------------------------------------------|------------------------------------------|
| 1  | -          | 7.20 ppm (br s) (1H) ; 6.96 ppm (br s) (1H)                                 | TOCSY 1 -> 1'                            |
| 2  | 173.9 ppm  | -                                                                           | HMBC 3 -> 2                              |
| 3  | 47.8 ppm   | 4.22 ppm (pentet) J=7.1 Hz (1H)                                             | COSY 3 -> 4                              |
| 4  | 18.2 ppm   | 1.21 ppm (d) J=7.2 Hz (3H)                                                  |                                          |
| 5  | -          | 7.90 ppm (d) J=7.5 Hz (1H)                                                  | COSY 5 -> 3 ; slight HMBC 5 -> 3         |
| 6  | 170.2 ppm  | -                                                                           | HMBC 5 -> 6                              |
| 7  | 56.8 ppm   | 4.22 ppm (dd) J=8.6, 6.6 Hz (1H)                                            | TOCSY 7 -> 11                            |
| 8  | 36.8 ppm   | 1.77-1.73 ppm (m) (1H)                                                      | COSY 7 -> 8                              |
| 9  | 23.8 ppm   | 1.46-1.42 ppm (m) (1H) ; 1.13 -1.08 ppm (m) (1H)                            | COSY 8 -> 9                              |
| 10 | 11.2 ppm   | 0.82 ppm (dd) J=7.5, 7.5 Hz (3H)                                            | COSY 9 -> 10                             |
| 11 | 15.2 ppm   | 0.85 ppm (d) J=7.0 Hz (3H)                                                  | COSY 8 -> 11                             |
| 12 | -          | 7.70 ppm (d) J=8.7 Hz                                                       | COSY 12 -> 7 ; slight HMBC 12 -> 7       |
| 13 | 169.1 ppm  | -                                                                           | HMBC 12 -> 13                            |
| 14 | 52.5 ppm   | 4.60 ppm (ddd) J=7.5, 7.5, 3.6 Hz (1H)                                      | COSY 14 -> 15                            |
| 15 | 68.7 ppm   | 3.75 ppm (dd) J=11.3, 7.1 Hz (1H) ; 3.66 ppm (dd) J=11.1, 3.4 Hz (1H)       | HMBC 15 -> 42                            |
| 16 | -          | -                                                                           | -                                        |
| 17 | -          | 8.82 ppm (d) J=7.9 Hz (1H)                                                  | COSY 17 -> 14                            |
| 18 | 172.0 ppm  | -                                                                           | HMBC 17 -> 18                            |
| 19 | 51.8 ppm   | 5.05 ppm (ddd) J=9.6, 9.6, 9.6 Hz (1H)                                      | COSY 30 -> 19                            |
| 20 | 29.1 ppm   | 2.97 ppm (dd) J=14.6, 4.3 Hz (1H) ; 2.80 ppm (dd) J=14.2, 9.9 Hz (1H)       | HMBC 20 -> 21 ; COSY/TOCSY 19 -> 20      |
| 21 | 110.2 ppm  | -                                                                           | HMBC 28, 29 -> 21                        |
| 22 | 129.3 ppm  | -                                                                           | HMBC 26, 29 -> 22                        |
| 23 | 121.0 ppm  | 7.85 ppm (d) J=1.9 Hz                                                       | HMBC 23 -> 27                            |
| 24 | 110.9 ppm  | -                                                                           | HMBC 23, 26 -> 24                        |
| 25 | 123.2 ppm  | 7.14 ppm (dd) J=8.4, 1.7 Hz (1H)                                            | HMBC 25 -> 27 / 23 -> 25                 |
| 26 | 113.1 ppm  | 7.27 ppm (d) J=8.7 Hz (1H)                                                  | TOCSY 23 -> 26                           |
| 27 | 134.8 ppm  | -                                                                           | HMBC 29 -> 27                            |
| 28 | -          | 10.91 ppm (d) J=2.1 Hz (1H)                                                 | Indole                                   |
| 29 | 125.3 ppm  | 7.17 ppm (d) J=2.5 Hz (1H)                                                  | COSY/TOCSY 28 -> 29                      |
| 30 | -          | 8.16 ppm (d) J=9.4 Hz                                                       | HMBC 30 -> 31                            |
| 31 | 171.2 ppm  | -                                                                           | HMBC 33 -> 31                            |
| 32 | 36.6 ppm   | 2.41-2.36 ppm (m) (1H) ; 2.07 ppm (ddd) J=13.9, 7.1, 3.2 Hz (1H)            | COSY/TOCSY 33 -> 32                      |
| 33 | 30.2 ppm   | 3.02-2.97 ppm (m) (1H) ; 2.63-2.60 ppm (m) (1H)                             | HMBC 35, 39 -> 33                        |
| 34 | 141.6 ppm  | -                                                                           | HMBC 33 -> 34                            |
| 35 | 127.8 ppm  | 7.01 ppm (d) J=7.9 Hz (1H)                                                  | TOCSY 39 -> 35                           |
| 36 | 123.2 ppm  | 7.16 ppm (dd) J=7.3, 7.3 Hz (1H)                                            | HMBC 36 -> 38                            |
| 37 | 125.3 ppm  | 7.02 ppm (d) J=8.1 Hz (1H)                                                  | HMBC 37 -> 40                            |
| 38 | 135.9 ppm  | -                                                                           | HMBC 41 -> 38                            |
| 39 | 123.9 ppm  | 7.26 ppm (br s) (1H)                                                        | HMBC 40 -> 39                            |
| 40 | 131.3 ppm  | 6.47 ppm (d) J=15.8 (1H)                                                    |                                          |
| 41 | 127.3 ppm  | 6.04 ppm (ddd) J=15.9, 7.0, 5.6 Hz (1H)                                     |                                          |
| 42 | 69.6 ppm   | 4.31 ppm (ddd) J=14.0, 5.1, 1.3 Hz (1H) ; 3.99 ppm (dd) J=14.1, 7.0 Hz (1H) | COSY 41 -> 42 ; HMBC 15 -> 42 / 42 -> 15 |

Macrocyclic Product **16c**

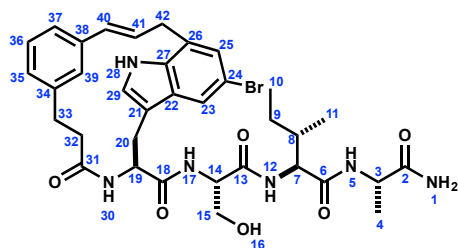

(600 MHz, DMSO-*d*<sub>6</sub>, 298K)

|    | <b>13C</b> | <b>1H</b>                                                        | <b>key correlation</b>         |
|----|------------|------------------------------------------------------------------|--------------------------------|
| 1  | -          | 7.14 ppm (br s) (1H) ; 6.97 ppm (br s) (1H)                      | TOCSY 1 -> 1'                  |
| 2  | 174.1 ppm  | -                                                                | HMBC 3 -> 2                    |
| 3  | 47.6 ppm   | 4.21 ppm (dd) J=7.3, 7.3 Hz (1H)                                 | COSY 3 -> 4                    |
| 4  | 18.0 ppm   | 1.21 ppm (d) J=7.1 Hz (3H)                                       |                                |
| 5  | -          | 7.93 ppm (d) J=7.6 Hz (3H)                                       | COSY 5 -> 3                    |
| 6  | 170.2 ppm  | -                                                                | HMBC 5 -> 6                    |
| 7  | 56.6 ppm   | 4.23 ppm (dd) J=8.3, 6.1 Hz (1H)                                 | TOCSY 7 -> 8                   |
| 8  | 36.4 ppm   | 1.83-1.79 ppm (m) (1H)                                           | COSY 8 -> 11 / TOCSY 8 -> 10   |
| 9  | 23.6 ppm   | 1.48-1.44 ppm (m) (1H)                                           | COSY 9 -> 10                   |
| 10 | 11.2 ppm   | 0.84 ppm (dd) J=7.4, 7.4 Hz (3H)                                 |                                |
| 11 | 15.1 ppm   | 0.88 ppm (d) J=6.8 Hz (3H)                                       |                                |
| 12 | -          | 7.74 ppm (d) J=8.3 Hz (1H)                                       | COSY/TOCSY 12 -> 7             |
| 13 | 170.3 ppm  | -                                                                | HMBC 12 -> 13                  |
| 14 | 54.7 ppm   | 4.42 ppm (dd) 13.5, 6.1 Hz (1H)                                  | HMBC 14 -> 13                  |
| 15 | 61.1 ppm   | 3.71-3.64 ppm (m) (2H)                                           | COSY 14 -> 15                  |
| 16 | -          | Not Observed                                                     | -                              |
| 17 | -          | 8.51 ppm (d) J=7.5 Hz (1H)                                       | HMBC 17 -> 14                  |
| 18 | 172.7 ppm  | -                                                                | HMBC 17 -> 18                  |
| 19 | 53.1 ppm   | 4.51 ppm (ddd) J=12.4, 8.5, 3.4 Hz                               | COSY 30 -> 19                  |
| 20 | 27.1 ppm   | 3.23 ppm (dd) J=14.0, 3.0 Hz (1H) ; 2.78 ppm (dd) J=13.4 Hz (1H) | COSY 19 -> 20                  |
| 21 | 109.7 ppm  | -                                                                | HMBC 20, 28, 29 -> 21          |
| 22 | 128.0 ppm  | -                                                                | HMBC 29 -> 22                  |
| 23 | 119.8 ppm  | 7.95 ppm (d) 1.4 Hz (1H)                                         | COSY/TOCSY 23 -> 25            |
| 24 | 110.0 ppm  | -                                                                | HMBC 23 -> 24                  |
| 25 | 123.9 ppm  | 7.09 ppm                                                         | HMBC 42 -> 25                  |
| 26 | 126.9 ppm  | -                                                                | HMBC 42 -> 26                  |
| 27 | 134.6 ppm  | -                                                                | HMBC 23, 25, 29 -> 27          |
| 28 | -          | 10.56 ppm (d) J=1.9 Hz (1H)                                      |                                |
| 29 | 126.6 ppm  | 7.27 ppm (d) J=2.5 Hz (1H)                                       | COSY/TOCSY 28 -> 29            |
| 30 | -          | 8.12 ppm (d) J=8.3 Hz                                            | HMBC 30 -> 31                  |
| 31 | 172.0 ppm  | -                                                                | HMBC 32, 33 -> 31              |
| 32 | 34.5 ppm   | 2.40-2.36 ppm (m) (1H) ; 2.15 ppm (dd) J=14.9, 11.9 Hz (1H)      | COSY/TOCSY 33 -> 32            |
| 33 | 27.2 ppm   | 3.06 ppm (dd) J=13.5, 12.2 Hz (1H) ; 2.36-2.33 (m) (1H)          | HMBC 35 -> 33                  |
| 34 | 142.6 ppm  | -                                                                | HMBC 36 -> 34                  |
| 35 | 126.5 ppm  | 6.85 ppm (d) J=7.7 Hz (1H)                                       | TOCSY 35 -> 39                 |
| 36 | 128.1 ppm  | 7.08 ppm (dd) J=7.4, 7.4 Hz (1H)                                 | COSY/TOCSY 35, 37 -> 36        |
| 37 | 120.4 ppm  | 7.19 ppm (d) J=7.7 Hz (1H)                                       | HMBC 40 -> 37 / TOCSY 37 -> 39 |
| 38 | 137.3 ppm  | -                                                                | HMBC 36 -> 38                  |
| 39 | 127.7 ppm  | 5.69 ppm (s) (1H)                                                | HMBC 39 -> 40                  |
| 40 | 132.3 ppm  | 4.68 ppm (d) J=16.4 Hz (1H)                                      |                                |
| 41 | 126.6 ppm  | 6.11 ppm (ddd) J=16.3, 5.8, 2.9 Hz (1H)                          |                                |
| 42 | 33.3 ppm   | 3.89 ppm (dd) J=17.3, 5.9 Hz (1H) ; 3.52-3.49 ppm (m) (1H)       | COSY 41 -> 42                  |

Macrocyclic Product 16d

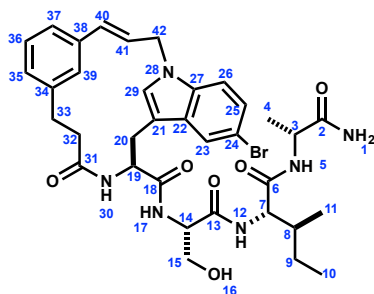

(600 MHz, DMSO-d<sub>6</sub>, 298K)

|    | 13C       | 1H                                                                     | key correlation                |
|----|-----------|------------------------------------------------------------------------|--------------------------------|
| 1  | -         | 7.11 ppm (br s) (1H) ; 6.97 ppm (br s) (1H)                            | HMBC 1' (slight) -> 3          |
| 2  | 174.1 ppm | -                                                                      | HMBC 3 -> 2                    |
| 3  | 47.9 ppm  | 4.21-4.18 ppm (m) (1H)                                                 | HMBC 5 -> 3                    |
| 4  | 18.2 ppm  | 1.20 ppm (d) 7.1 Hz (3H)                                               | COSY 3 -> 4                    |
| 5  | -         | 7.89 ppm (d) J=6.2 Hz (1H)                                             | HMBC 5 ->                      |
| 6  | 170.3 ppm | -                                                                      | HMBC 7 -> 6                    |
| 7  | 57.2 ppm  | 4.23-4.20 ppm (m) (1H)                                                 | HMBC 12 -> 7                   |
| 8  | 36.8 ppm  | 1.82-1.78 ppm (m) (1H)                                                 | COSY 7 -> 8                    |
| 9  | 24.0 ppm  | 1.46-1.42 ppm (m) (1H) ; 1.18-1.13 ppm (m) (1H)                        | COSY 8 -> 9                    |
| 10 | 11.4 ppm  | 0.83 ppm (dd) J=7.4, 7.4 Hz (3H)                                       | COSY 9 -> 10                   |
| 11 | 15.4 ppm  | 0.87 ppm (d) J=7.2 Hz (3H)                                             | COSY 8 -> 11                   |
| 12 | -         | 7.73 ppm (d) 8.3 Hz (1H)                                               | HMBC 12 -> 13                  |
| 13 | 170.3 ppm | -                                                                      | HMBC 14 -> 13                  |
| 14 | 54.9 ppm  | 4.39 ppm (ddd) J=6.5, 6.5, 6.5 Hz (1H)                                 | COSY 17 -> 14                  |
| 15 | 61.3 ppm  | 3.69 ppm (dd) J= 10.6, 5.9 Hz (1H) ; 3.62 ppm (dd) J=10.6, 5.9 Hz (1H) | COSY 14 -> 15                  |
| 16 | -         | Not Observed                                                           | -                              |
| 17 | -         | 8.34 ppm (d) J=7.5 Hz (1H)                                             | HMBC 17 -> 18                  |
| 18 | 172.6 ppm | -                                                                      | HMBC 19 -> 18                  |
| 19 | 53.6 ppm  | 4.53 ppm (ddd)                                                         | COSY 19 -> 20                  |
| 20 | 26.9 ppm  | 3.11 ppm (dd) J=14.9, 1.7 Hz (1H) ; 2.88 ppm (dd) J=14.8, 12.5 Hz (1H) | HMBC 20 -> 29                  |
| 21 | 112.1 ppm | -                                                                      | HMBC 20, 29 -> 21              |
| 22 | 130.3 ppm | -                                                                      | HMBC 26, 29 -> 22              |
| 23 | 121.3 ppm | 7.90 ppm (d) J=1.8 Hz (1H)                                             | COSY/TOCSY 23 -> 25            |
| 24 | 111.9 ppm | -                                                                      | HMBC 23, 25 (slight), 26 -> 24 |
| 25 | 123.7 ppm | 7.25 ppm (d) J=8.7, 1.8 Hz (1H)                                        |                                |
| 26 | 112.6 ppm | 7.57 ppm (d) J=8.7 Hz (1H)                                             | TOCSY 23 -> 26 ; COSY 25 -> 26 |
| 27 | 136.3 ppm | -                                                                      | HMBC 23, 25, 29 -> 27          |
| 28 | -         | -                                                                      | -                              |
| 29 | 129.5 ppm | 7.37 ppm (s)                                                           | HMBV 42 -> 29                  |
| 30 | -         | 8.38 ppm (d) J=7.6 Hz (1H)                                             | HMBC 30 -> 31 ; COSY 30 -> 19  |
| 31 | 172.5 ppm | -                                                                      | HMBC 32, 33 -> 31              |
| 32 | 32.8 ppm  | 2.66 ppm (dd) J=14.0, 14.0 Hz (1H) ; 2.40-2.36 ppm (1H)                | HMBC 32 -> 34                  |
| 33 | 27.0 ppm  | 2.66-2.62 ppm (m) (1H) ; 3.09 ppm (dd) J=15.8, 12.9 Hz (1H)            | HMBC 33' -> 34,35,39           |
| 34 | 141.7 ppm | -                                                                      | HMBC 36 -> 34                  |
| 35 | 127.4 ppm | 6.99 ppm (d) J=8.1 Hz (1H)                                             | COSY 36 -> 35                  |
| 36 | 128.0 ppm | 7.13 ppm (dd) J=7.6 Hz (1H)                                            | COSY 36 -> 37                  |
| 37 | 123.8 ppm | 6.98 ppm (d) J=7.1 Hz (1H)                                             | HMBC 37 -> 40                  |
| 38 | 137.8 ppm | -                                                                      | HMBC 41 -> 38                  |
| 39 | 125.1 ppm | 6.69 ppm (s) (1H)                                                      | HMBC 39 -> 40                  |
| 40 | 132.2 ppm | 6.50 ppm (d) J=15.6 Hz (1H)                                            |                                |
| 41 | 128.1 ppm | 5.99 ppm (ddd) J=15.5, 7.7, 6.5 Hz (1H)                                |                                |
| 42 | 45.4 ppm  | 4.80-4.78 ppm (m) (2H)                                                 | COSY 41 -> 42                  |

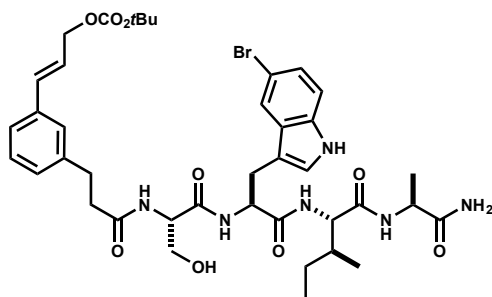

**Acyclic Cinnamyl Carbonate 13:** Synthesized according to Procedure A with 0.350 mmol starting template. Purified via SiO<sub>2</sub> chromatography using a gradient from 1% to 10% methanol in chloroform. Beige Solid. 80% yield. <sup>1</sup>H-NMR (500 MHz, DMSO-d<sub>6</sub>) δ 11.06 (s, 1H), 8.09 (d, *J* = 7.7 Hz, 1H), 7.94 (d, *J* = 7.6 Hz, 1H), 7.88 (d, *J* = 7.7 Hz, 1H), 7.85 (d, *J* = 8.6 Hz, 1H), 7.74 (d, *J* = 1.3 Hz, 1H), 7.29-7.18 (m, 5H), 7.15 (dd, *J* = 8.5, 1.5 Hz, 1H), 6.97 (br s, 2H), 6.63 (d, *J* = 16.0 Hz, 1H), 6.33 (ddd, *J* = 15.9, 6.2, 6.2 Hz, 1H), 5.03 (dd, *J* = 5.5, 5.5 Hz, 1H), 4.66 (d, *J* = 6.1 Hz, 1H), 4.52 (ddd, *J* = 8.0, 8.0, 4.8 Hz, 1H), 4.32 (dd, *J* = 13.6, 6.4 Hz, 1H), 4.19 (pentet, *J* = 7.5 Hz, 1H), 4.15 (dd, *J* = 8.0, 8.0 Hz, 1H), 3.64-3.58 (m, 1H), 3.48 (dd, *J* = 5.8, 5.8 Hz, 1H), 3.14-3.11 (m, 2H), 2.95 (dd, *J* = 14.7, 8.8 Hz, 1H), 2.77-2.74 (m, 2H), 2.46-2.40 (m, 2H), 1.73-1.68 (m, 1H), 1.43 (s, 9H), 1.39-1.35 (m, 1H), 1.20 (d, *J* = 7.1 Hz, 3H), 1.07-1.01 (m, 1H), 0.79 (d, *J* = 7.1 Hz, 3H), 0.79 (dd, *J* = 7.5, 7.5 Hz, 3H). (126 MHz, DMSO-d<sub>6</sub>) δ 174.0, 171.6, 171.2, 170.4, 170.3, 152.8, 141.8, 135.8, 134.7, 133.4, 129.2, 128.6, 128.0, 126.4, 125.5, 124.2, 123.3, 123.3, 120.7, 113.3, 111.0, 109.8, 81.5, 66.9, 61.8, 57.0, 55.0, 53.5, 48.1, 36.6, 30.9, 27.4, 24.2, 18.2, 18.1, 16.7, 15.2, 11.1. MS *m/z* [M-OCO<sub>2</sub>tBu]<sup>+</sup>, 841.3 (calc'd: C<sub>35</sub>H<sub>44</sub>BrN<sub>6</sub>O<sub>6</sub> [M+H]<sup>+</sup>, 841.1)

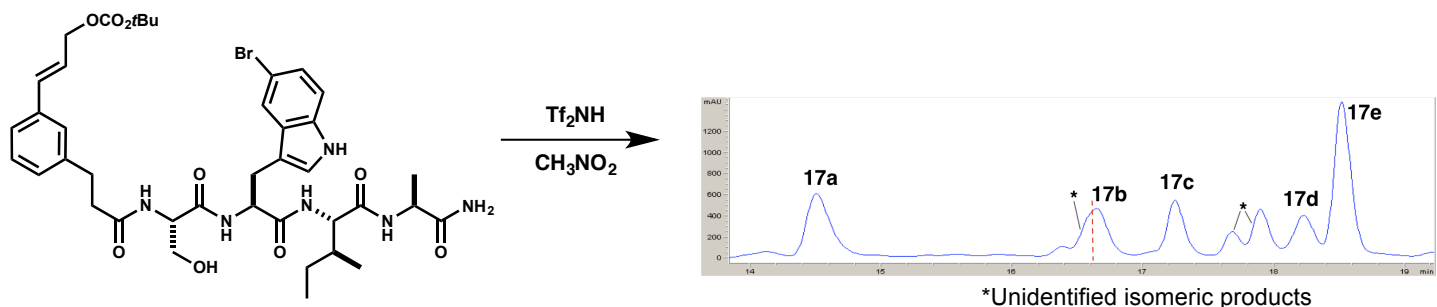

MS *m/z* 723.3 (calc'd: C<sub>45</sub>H<sub>42</sub>FN<sub>6</sub>O<sub>5</sub>, [M+H]<sup>+</sup>, 723.2).

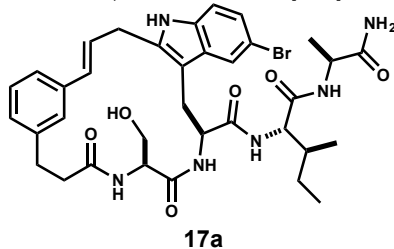

MS *m/z* 723.1 (calc'd: C<sub>45</sub>H<sub>42</sub>FN<sub>6</sub>O<sub>5</sub>, [M+H]<sup>+</sup>, 723.2).

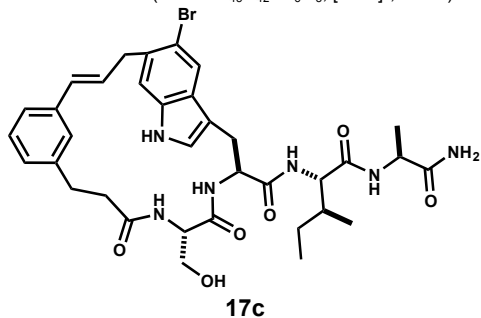

MS *m/z* 723.1 (calc'd: C<sub>45</sub>H<sub>42</sub>FN<sub>6</sub>O<sub>5</sub>, [M+H]<sup>+</sup>, 723.2).

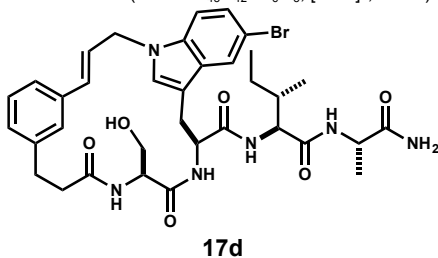

MS *m/z* 723.1 (calc'd: C<sub>45</sub>H<sub>42</sub>FN<sub>6</sub>O<sub>5</sub>, [M+H]<sup>+</sup>, 723.2).

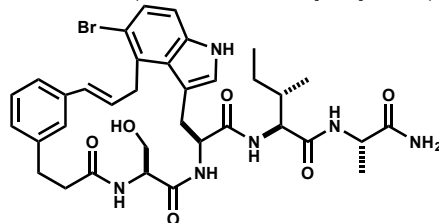

MS *m/z* 723.1 (calc'd: C<sub>45</sub>H<sub>42</sub>FN<sub>6</sub>O<sub>5</sub>, [M+H]<sup>+</sup>, 723.2).

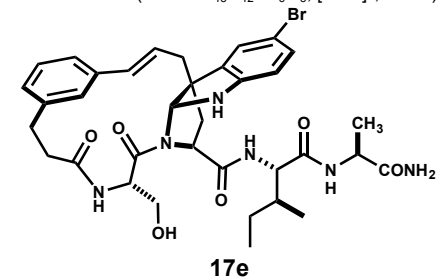

**Analytical HPLC Method**  
 Column: Waters Sunfire™  
 C<sub>18</sub>, 4.6x250 mm, 5 μm  
 Solvent A: H<sub>2</sub>O + 0.1% TFA  
 Solvent B: ACN + 0.1% TFA  
 Flow rate: 1.00 mL/min

| Time | %B |
|------|----|
| 0    | 30 |
| 2.5  | 30 |
| 24   | 86 |
| 29   | 30 |

**Preparative HPLC Method**  
 Column: Waters Sunfire™  
 C<sub>18</sub>, 19x250 mm, 5 μm  
 Solvent A: H<sub>2</sub>O + 0.1% TFA  
 Solvent B: ACN + 0.1% TFA  
 Flow rate: 18.0 mL/min

| Time | %B |
|------|----|
| 0    | 35 |
| 4    | 45 |
| 18   | 57 |
| 18.5 | 35 |

**Semi-Prep HPLC Method**  
 Column: Waters XSelect™  
 C<sub>18</sub>, 10x250 mm, 5 μm  
 Solvent A: H<sub>2</sub>O + 0.1% TFA  
 Solvent B: ACN + 0.1% TFA  
 Flow rate: 6.00 mL/min

| Time | %B |
|------|----|
| 0    | 45 |
| 1    | 45 |
| 9    | 49 |

Macrocyclic Product 17a

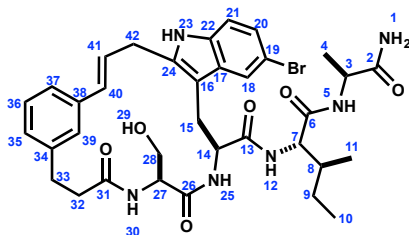

(600 MHz, DMSO-*d*<sub>6</sub>, 298K)

|    | 13C       | 1H                                                                                      | key correlation                |
|----|-----------|-----------------------------------------------------------------------------------------|--------------------------------|
| 1  | -         | 6.91 ppm (br s) (1H) ; 7.17 ppm (br s) (1H)                                             | HMBC 1 -> 2 / TOCSY 1 -> 1'    |
| 2  | 173.7 ppm | -                                                                                       | HMBC 3 -> 2                    |
| 3  | 47.9 ppm  | 4.19 ppm (p) J=7.1 Hz (1H)                                                              | COSY 5 -> 3                    |
| 4  | 17.9 ppm  | 1.22 ppm (d) J=7.1 Hz (3H)                                                              | COSY 3 -> 4                    |
| 5  | -         | 7.97 ppm (d) J=7.1 Hz (3H)                                                              | HMBC 5 -> 6                    |
| 6  | 170.4 ppm | -                                                                                       | HMBC 7 -> 6                    |
| 7  | 56.9 ppm  | 4.27 ppm (t) J=8.1 Hz (1H)                                                              | COSY 12 -> 7                   |
| 8  | 36.3 ppm  | 1.79-1.75 ppm (m) (1H)                                                                  | COSY 7 -> 8                    |
| 9  | 24.1 ppm  | 1.50-1.46 ppm (m) (1H) ; 1.18-1.11 ppm (m) (1H)                                         | COSY 8 -> 9                    |
| 10 | 10.7 ppm  | 0.86 ppm (t) J=7.4 Hz (3H)                                                              | COSY 9 -> 10                   |
| 11 | 15.0 ppm  | 0.88 ppm (d) J=6.8 Hz (3H)                                                              | COSY 8 -> 11                   |
| 12 | -         | 7.81 ppm (d) J=8.9 Hz (1H)                                                              | HMBC 12 -> 13                  |
| 13 | 171.0 ppm | -                                                                                       | HMBC 14 -> 13                  |
| 14 | 25.8 ppm  | 4.50-4.47 ppm (m) (1H)                                                                  | COSY 25 -> 14                  |
| 15 | 25.9 ppm  | 3.29 ppm (dd) J=14.7 & 2.4 Hz (1H) ; 2.91 ppm (dd) J=14.7 & 10.3 Hz (1H)                | COSY 14 -> 15                  |
| 16 | 107.1 ppm | -                                                                                       | HMBC 18 & 23 -> 16             |
| 17 | 129.7 ppm | -                                                                                       | HMBC 21 & 23 -> 17             |
| 18 | 119.7 ppm | 7.65 ppm (d) J=1.3 Hz (1H)                                                              | COSY 18->20 / TOCSY 18 -> 21   |
| 19 | 110.6 ppm | -                                                                                       | HMBC 18, 20 (slight), 21 -> 19 |
| 20 | 122.8 ppm | 7.12 ppm (dd) J=8.5 & 1.4 Hz (1H)                                                       | HMBC 18 -> 20                  |
| 21 | 112.5 ppm | 7.20 ppm (d) J=8.7 Hz (1H)                                                              | HMBC 21 -> 17                  |
| 22 | 134.2 ppm | -                                                                                       | HMBC 18, 20, 23 -> 22          |
| 23 | -         | 10.92 ppm (br s)                                                                        |                                |
| 24 | 136.1 ppm | -                                                                                       | HMBC 15, 22, & 42 -> 24        |
| 25 | -         | 8.83 ppm (d) J=8.6 Hz (1H)                                                              | HMBC 25 -> 26                  |
| 26 | 170.6 ppm | -                                                                                       | HMBC 27 -> 26                  |
| 27 | 54.6 ppm  | 4.56-4.52 ppm (m) (1H)                                                                  | COSY 30 -> 27                  |
| 28 | 62.2 ppm  | 3.63 ppm (dd) J=9.5 & 5.5 Hz (1H); 3.43 (t) J=9.3 Hz (1H)                               | COSY/TOCSY 27 -> 28            |
| 29 | -         | Not Observed                                                                            | -                              |
| 30 | -         | 8.01 ppm (d) J=7.2 Hz (1H)                                                              | HMBC 30 -> 31                  |
| 31 | 172.0 ppm | -                                                                                       | HMBC 32 -> 31                  |
| 32 | 34.3 ppm  | 2.59 ppm (ddd) J=14.2, 11.8, & 2.8 Hz (1H) ; 2.21 ppm (ddd) J= 14.4, 6.7, & 2.9 Hz (1H) | COSY/TOCSY 33 -> 32            |
| 33 | 29.3 ppm  | 3.07 ppm (ddd) J=14.6, 11.7, & 2.0 Hz (1H) ; 2.64 ppm (ddd) J= 14.9, 7.0, & 1.5 Hz (1H) | HMBC 33 -> 34, 35, & 39        |
| 34 | 141.2 ppm | -                                                                                       | HMBC 33 & 32' -> 34            |
| 35 | 127.5 ppm | 6.99 ppm (d) J=7.6 Hz (1H)                                                              | HMBC 37 & 39 -> 35             |
| 36 | 128.1 ppm | 7.18 ppm (t) J=7.2 Hz (1H)                                                              | COSY 36 -> 35                  |
| 37 | 124.5 ppm | 7.06 ppm (d) J=8.0 Hz (1H)                                                              | HMBC 40->37                    |
| 38 | 136.5 ppm | -                                                                                       | HMBC 41 & 42 -> 38             |
| 39 | 122.5 ppm | 7.08 ppm (s) (1H)                                                                       | HMBC 40 -> 39 ; 39 ->37        |
| 40 | 130.6 ppm | 6.57 ppm (d) J=15.7 Hz (1H)                                                             |                                |
| 41 | 127.9 ppm | 5.98 ppm (ddd) J=15.7, 8.4, 5.9 Hz (1H)                                                 |                                |
| 42 | 29.1 ppm  | 3.75 (dd) J=14.4 & 5.4 Hz (1H) ; 3.50 (dd) J=14.5 & 8.7 Hz (1H)                         | COSY/TOCSY 40 & 41 -> 42       |

Macrocyclic Product 17b

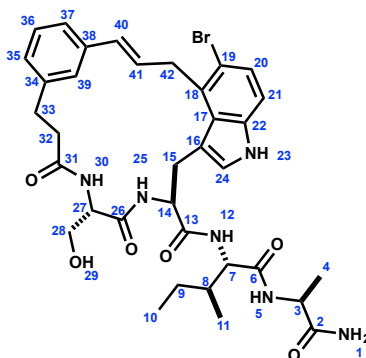

(600 MHz, DMSO-*d*<sub>6</sub>, 298K)

|    | <b>13C</b>   | <b>1H</b>                                                        | <b>key correlation</b>            |
|----|--------------|------------------------------------------------------------------|-----------------------------------|
| 1  | -            | 7.61 ppm (br s) (1H) ; 6.95 ppm (br s) (1H)                      | TOCSY 1 -> 1'                     |
| 2  | 174.1 ppm    | -                                                                | HMBC 3 -> 2                       |
| 3  | 47.9 ppm     | 4.16 ppm (pentet) J=7.2 Hz (1H)                                  | COSY 3 -> 4 / HMBC 1->3           |
| 4  | 18.1 ppm     | 1.16 ppm (d) J=7.1 Hz (3H)                                       |                                   |
| 5  | -            | 7.84 ppm (d) J=8.5 Hz (1H)                                       | COSY 5 -> 3                       |
| 6  | 170.1 ppm    | -                                                                | HMBC 7 -> 6                       |
| 7  | 56.9 ppm     | 4.16 ppm (dd) J=8.3, 7.4 Hz (1H)                                 | TOCSY 7 -> 8,11                   |
| 8  | 36.3 ppm     | 1.75-1.71 ppm (m) (1H)                                           | COSY 7 -> 8                       |
| 9  | 24.1 ppm     | 1.41-1.37 ppm (m) (1H) ; 1.09-1.02 ppm (m) (1H)                  | COSY 8 -> 9                       |
| 10 | 11.0 ppm     | 0.78 ppm (dd) J=7.4, 7.4 Hz (3H)                                 | COSY 9 -> 10                      |
| 11 | 15.2 ppm     | 0.80 ppm (d) J= 6.8 Hz (3H)                                      | COSY 8 -> 11                      |
| 12 | -            | 7.80 ppm (d) J=7.4 Hz (1H)                                       | COSY 12 -> 7                      |
| 13 | 170.4 ppm    | -                                                                | HMBC 12 -> 13                     |
| 14 | 53.0 ppm     | 4.64-4.58 ppm (m) (1H)                                           |                                   |
| 15 | 29.4 ppm     | 3.36-3.34 ppm (m) (1H) ; 3.12 ppm (dd) J=15.0, 2.7 Hz (1H)       | COSY 14 -> 15                     |
| 16 | 110.8 ppm    | -                                                                | HMBC 24 -> 16                     |
| 17 | 127.4 ppm    | -                                                                | HMBC 21,24 -> 17                  |
| 18 | 129.9 ppm    | -                                                                | HMBC 20 -> 18                     |
| 19 | 115.1 ppm    | -                                                                | HMBC 21 -> 19                     |
| 20 | 124.5 ppm    | 7.26 ppm (d) J=8.7 Hz (1H)                                       |                                   |
| 21 | 111.7 ppm    | 7.19 ppm (d) J=8.6 Hz (1H)                                       | COSY 20 -> 21                     |
| 22 | 135.6 ppm    | -                                                                | HMBC 20,24 -> 22                  |
| 23 | -            | 11.03 ppm (s) (1H)                                               | Indole                            |
| 24 | 124.3 ppm    | 7.06 ppm (d) J=1.5 Hz (1H)                                       | COSY 23 -> 24                     |
| 25 | -            | 8.26 ppm (br s) (1H)                                             | COSY 25 -> 14                     |
| 26 | 170.7 ppm    | -                                                                | HMBC 25 -> 26                     |
| 27 | 54.0 ppm     | 4.58 ppm (ddd) J=8.6, 6.5, 6.5 (1H)                              | COSY 27 -> 28                     |
| 28 | 62.1 ppm     | 3.50-3.41 ppm (m) (2H)                                           | COSY 29 -> 28                     |
| 29 | -            | 4.80 ppm (dd) J=5.4, 5.4 Hz (1H)                                 | affected by water suppression     |
| 30 | -            | 7.84 ppm (d) J=8.5 Hz (1H)                                       | COSY 27 -> 30                     |
| 31 | 170.9 ppm    | -                                                                | HMBC 32, 33 -> 31                 |
| 32 | 35.9 ppm     | 2.48-2.46 ppm (m) (1H) ; 2.32 ppm (ddd) J=14.5, 6.7, 2.5 Hz (1H) | COSY/TOCSY 33 -> 32               |
| 33 | 30.0 ppm     | 3.03 ppm (dd) J=12.4, 12.4 Hz (1H) ; 2.65-2.61 ppm (m) (1H)      | HMBC 33 -> 35,39                  |
| 34 | 141.7 ppm    | -                                                                | HMBC 33,36 -> 34                  |
| 35 | 127.5 ppm    | 6.98 ppm (d) J=7.4 Hz (1H)                                       | HMBC 37 -> 35                     |
| 36 | 128.2 ppm    | 7.11 ppm (dd) J=7.5, 7.5 Hz (1H)                                 | COSY 36 -> 35,37 ; TOCSY 36 -> 37 |
| 37 | 123.0 ppm    | 7.06 ppm (d) J=7.7 Hz (1H)                                       | HMBC 37 -> 40                     |
| 38 | 136.9 ppm    | -                                                                | HMBC 36 -> 38                     |
| 39 | 125.6 ppm    | 7.03 ppm (br s) (1H)                                             | HMBC 35,37 -> 39                  |
| 40 | 130.6 ppm    | 6.14 ppm (d) J=15.6 Hz (1H)                                      | HMBC 37 -> 40                     |
| 41 | not observed | 6.36 ppm (ddd) J=16.0, 5.5, 5.5 Hz (1H)                          |                                   |
| 42 | 35.7 ppm     | 4.05-4.00 ppm (m) (2H)                                           | COSY/TOCSY 40, 41 -> 42           |

Macrocyclic Product 17c

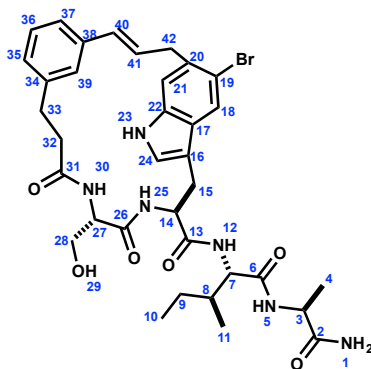

(600 MHz, DMSO-d<sub>6</sub>, 298K)

|    | 13C       | 1H                                                          | key correlation                         |
|----|-----------|-------------------------------------------------------------|-----------------------------------------|
| 1  | -         | 7.23 ppm (br s) (1H) ; 6.95 ppm (br s) (1H)                 | TOCSY 1 -> 1'                           |
| 2  | 174.0 ppm | -                                                           | HMBC 3 -> 2                             |
| 3  | 48.0 ppm  | 4.21 ppm (p) J=7.0 Hz (1H)                                  | COSY 5 -> 3                             |
| 4  | 18.2 ppm  | 1.21 ppm (d) J=7.0 Hz (3H)                                  |                                         |
| 5  | -         | 8.02 ppm (d) J=7.2 Hz (1H)                                  | HMBC 5 -> 6                             |
| 6  | 170.6 ppm | -                                                           | HMBC 7 -> 6                             |
| 7  | 56.7 ppm  | 4.25 ppm (dd) J=8.6, 8.6 Hz (1H)                            | TOCSY 7 -> 8                            |
| 8  | 36.5 ppm  | 1.80-1.75 ppm (m) (1H)                                      | COSY/TOCSY 8 -> 11                      |
| 9  | 24.2 ppm  | 1.53-1.49 ppm (m) (1H)                                      | COSY/TOCSY 9 -> 10                      |
| 10 | 10.9 ppm  | 0.86 ppm (dd) J= 7.6, 7.6 Hz                                |                                         |
| 11 | 15.1 ppm  | 0.88 ppm (d) J=6.8 Hz (1H)                                  |                                         |
| 12 | -         | 7.85 ppm (d) J=8.9 Hz (1H)                                  | COSY 12 -> 7                            |
| 13 | 170.8 ppm | -                                                           | HMBC 12 -> 13                           |
| 14 | 57.5 ppm  | 4.47 ppm (ddd) J=12.0, 9.7, 2.2 Hz (1H)                     | COSY 25 -> 14                           |
| 15 | 26.6 ppm  | 3.31-3.28 ppm (m) (1H) ; 2.88 ppm (dd) J=14.3, 12.2 Hz (1H) | COSY 14 -> 15                           |
| 16 | 111.9 ppm | -                                                           | HMBC 15, 24 -> 16                       |
| 17 | 128.6 ppm | -                                                           | HMBC 21,24 -> 17                        |
| 18 | 122.3 ppm | 8.23 ppm (s) (1H)                                           |                                         |
| 19 | 114.6 ppm | -                                                           | HMBC 18, 21 -> 19                       |
| 20 | 128.7 ppm | -                                                           | HMBC 18,42 -> 20                        |
| 21 | 113.3 ppm | 7.23 ppm (s) (1H)                                           |                                         |
| 22 | 135.2 ppm | -                                                           | HMBC 18,24 -> 22                        |
| 23 | -         | 10.93 ppm (d) J=1.7 Hz (1H)                                 | Indole                                  |
| 24 | 124.2 ppm | 7.29 ppm (d) J=1.7 Hz (1H)                                  | COSY 23 -> 24 ; HMBC 15 -> 24           |
| 25 | -         | 8.68 ppm (d) J=9.6 Hz (1H)                                  | HMBC 25 -> 26                           |
| 26 | 169.4 ppm | -                                                           | HMBC 27 -> 26                           |
| 27 | 54.8 ppm  | 4.18 ppm (dd) J=11.9, 6.3 Hz (1H)                           | COSY/TOCSY 30 -> 27                     |
| 28 | 62.1 ppm  | 3.75-3.72 ppm (m) (1H) ; 3.47-3.44 ppm (m) (1H)             | COSY 27 -> 28 ; TOCSY 30 -> 28          |
| 29 | -         | 5.36 ppm (dd) J=5.3, 5.3 Hz (1H)                            | COSY 29 -> 28 ; TOCSY 29 -> 27          |
| 30 | -         | 7.36 ppm (d) J=6.2 Hz (1H)                                  | HMBC 30 -> 31                           |
| 31 | 171.2 ppm | -                                                           | HMBC 32,33' -> 31                       |
| 32 | 33.1 ppm  | 2.51-2.48 ppm (m) (1H) ; 2.29 ppm (dd) J=15.5, 6.7 Hz (1H)  | COSY/TOCSY 33 -> 32                     |
| 33 | 27.2 ppm  | 3.10 ppm (dd) J=15.2, 12.2 Hz (1H) ; 2.50-2.54 ppm (m) (1H) | HMBC 35 -> 33                           |
| 34 | 141.8 ppm | -                                                           | HMBC 32,33( slight),36 -> 34            |
| 35 | 127.0 ppm | 6.91 ppm (d) J=7.6 Hz (1H)                                  | HMBC 32( slight),33 -> 35               |
| 36 | 128.2 ppm | 7.13 ppm (dd) J= 7.6, 7.6 Hz (1H)                           | TOCSY 36 -> 39                          |
| 37 | 121.2 ppm | 7.28 ppm (d) J=7.2 Hz (1H)                                  | COSY 37 -> 39                           |
| 38 | 136.7 ppm | -                                                           | HMBC 36,40( slight) -> 38               |
| 39 | 125.8 ppm | 6.38 ppm (s) (1H)                                           | HMBC 39 -> 40                           |
| 40 | 129.6 ppm | 5.43 ppm (d) J=15.9 Hz (1H)                                 |                                         |
| 41 | 128.6 ppm | 6.46 ppm (ddd) J=16.0, 4.8, 4.8 Hz (1H)                     |                                         |
| 42 | 38.1 ppm  | 3.76-3.72 ppm (m) (1H) ; 3.52-3.48 ppm (m) (1H)             | COSY/TOCSY 40, 41 -> 42 ; HMBC 21 -> 42 |

Macrocyclic Product 17d

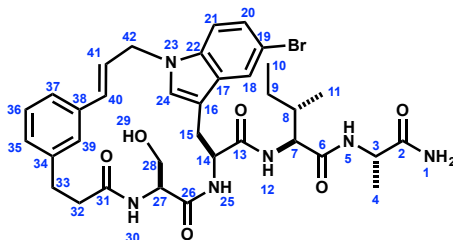

(600 MHz, DMSO-*d*<sub>6</sub>, 298K)

|    | <b>13C</b> | <b>1H</b>                                                              | <b>key correlation</b>         |
|----|------------|------------------------------------------------------------------------|--------------------------------|
| 1  | -          | 7.22 ppm (br s) (1H) ; 6.95 ppm (br s) (1H)                            | TOCSY 1 -> 1'                  |
| 2  | 173.3 ppm  | -                                                                      | HMBC 3 -> 2                    |
| 3  | 47.7 ppm   | 4.20 ppm (p) J=7.2 Hz (1H)                                             | COSY 3 -> 4                    |
| 4  | 18.0 ppm   | 1.23 ppm (d) J=7.2 Hz (3H)                                             |                                |
| 5  | -          | 7.97 ppm (d) J=6.5 Hz (1H)                                             | HMBC 5 -> 6                    |
| 6  | 170.1 ppm  | -                                                                      | HMBC 7 -> 6                    |
| 7  | 56.7 ppm   | 4.25 ppm (t) J=8.5 Hz (1H)                                             | COSY 12 -> 7                   |
| 8  | 22.2 ppm   | 1.79-1.76 ppm (m) (1H)                                                 | COSY 7 -> 8                    |
| 9  | 24.0 ppm   | 1.48 -1.44 ppm (m) (1H) ; 1.15-1.10 ppm (m) (1H)                       | COSY 8 -> 9                    |
| 10 | 10.7 ppm   | 0.84 ppm (t) J=7.5 Hz (3H)                                             | COSY 9 -> 10                   |
| 11 | 15.0 ppm   | 0.87 ppm (d) J=6.8 Hz (3H)                                             | COSY 8 -> 11                   |
| 12 | -          | 7.97 ppm (d) J=9.4 Hz (1H)                                             | HMBC 12 -> 13                  |
| 13 | 171.2 ppm  | -                                                                      | HMBC 14 -> 13                  |
| 14 | 53.1 ppm   | 4.62 ppm (ddd) J=12.2, 8.7, & 2.5 Hz (1H)                              | COSY/TOCSY 14 -> 15            |
| 15 | 26.4 ppm   | 3.25 ppm (dd) J=14.9, 1.7 Hz (1H) ; 2.86 ppm (dd) J=14.7, 12.5 Hz (1H) | HMBC 15 -> 16                  |
| 16 | 110.4 ppm  | -                                                                      | HMBC 15, 24 -> 16              |
| 17 | 128.8 ppm  | -                                                                      | HMBC 21, 24 -> 17              |
| 18 | 120.5 ppm  | 7.79 ppm (d) J=1.9 Hz (1H)                                             | HMBC 18 -> 20, 22              |
| 19 | 111.3 ppm  | -                                                                      | HMBC 18 -> 19                  |
| 20 | 123.2 ppm  | 7.23 ppm (dd) J=8.5 Hz, 1.9 Hz (1H)                                    | HMBC 18 -> 20                  |
| 21 | 111.5 ppm  | 7.45 ppm (d) J=8.9 Hz (1H)                                             | HMBC 21 -> 17                  |
| 22 | 134.4 ppm  | -                                                                      | HMBC 18, 24, 42 -> 22          |
| 23 | -          | -                                                                      | -                              |
| 24 | 127.9 ppm  | 7.29 ppm (s) (1H)                                                      | HMBC 42 -> 24                  |
| 25 | -          | 8.56 ppm (d) J=8.5 Hz (1H)                                             | COSY 25 -> 14                  |
| 26 | 170.0 ppm  | -                                                                      | HMBC 25 -> 26                  |
| 27 | 53.5 ppm   | 4.48 ppm (ddd) J=7.7, 7.7, 5.4 Hz (1H)                                 | HMBC 27 -> 26                  |
| 28 | 62.5 ppm   | 3.54 ppm (dd)                                                          |                                |
| 29 | -          | Not Observed                                                           | -                              |
| 30 | -          | 7.78 ppm (d) J=7.9 Hz (1H)                                             | COSY 30 -> 27                  |
| 31 | 171.0 ppm  | -                                                                      | HMBC 30 -> 31                  |
| 32 | 34.7 ppm   | 2.60-2.54 ppm (m) (1H) ; 2.23 ppm (ddd) J=15.2, 7.5, 2.6 Hz (1H)       | HMBC 32 -> 31, 34              |
| 33 | 29.0 ppm   | 3.04 ppm (ddd) J=14.4, 11.6, 2.2 Hz (1H) ; 2.60-2.54 (m) (1H)          | COSY/TOCSY 32 -> 33            |
| 34 | 141.5 ppm  | -                                                                      | HMBC 32 -> 34                  |
| 35 | 128.1 ppm  | 7.18-7.17 ppm (m) (1H)                                                 | COSY 35 -> 36 / TOCSY 35 -> 39 |
| 36 | 128.0 ppm  | 7.01-6.99 ppm (m)                                                      | COSY/TOCSY 35, 37 -> 36        |
| 37 | 123.6 ppm  | 7.18-7.17 ppm (m) (1H)                                                 | HMBC 37 -> 40 / TOCSY 37 -> 39 |
| 38 | 135.6 ppm  | -                                                                      | HMBC 41 -> 38                  |
| 39 | 123.9 ppm  | 6.85 ppm (s) (1H)                                                      | HMBC 39 -> 35, 37, 40          |
| 40 | 130.4 ppm  | 6.10 ppm (d) J=16.1 Hz (1H)                                            |                                |
| 41 | 125.1 ppm  | 6.19 ppm (dt) J=15.9, 5.4 Hz (1H)                                      |                                |
| 42 | 46.3 ppm   | 4.92 ppm (d) J=5.1 Hz (2H)                                             | COSY/TOCSY 40, 41 -> 42        |



Macrocyclic Product 17e

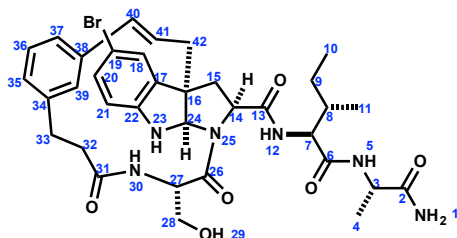

(500 MHz, DMSO-d<sub>6</sub>, 298K)

|    | 13C       | 1H                                                                        | key correlation                        |
|----|-----------|---------------------------------------------------------------------------|----------------------------------------|
| 1  | -         | 7.04 ppm (br s) (1H) ; 6.93 ppm (br s) (1H)                               | HMBC 1 & 1' -> 2                       |
| 2  | 173.8 ppm | -                                                                         | HMBC 3 -> 2                            |
| 3  | 48.0 ppm  | 4.10 ppm (p) J=7.3 Hz (1H)                                                | COSY 5 -> 3                            |
| 4  | 17.8 ppm  | 1.17 ppm (d) J=7.2 Hz (3H)                                                | COSY/TOCSY 3 -> 4                      |
| 5  | -         | 7.69 ppm (d) J=7.5 Hz (1H)                                                | HMBC 5 -> 6                            |
| 6  | 170.3 ppm | -                                                                         | HMBC 7 -> 6                            |
| 7  | 56.5 ppm  | 4.01 ppm (dd) J=8.8, 5.7 Hz (1H)                                          | COSY 12 -> 7                           |
| 8  | 37.0 ppm  | 1.60-1.54 ppm (m) (1H)                                                    | COSY/TOCSY 7->8                        |
| 9  | 23.5 ppm  | 1.18-1.15 ppm (m) (1H) ; 0.87-0.82 ppm (m) (1H)                           | COSY/TOCSY 8 -> 9                      |
| 10 | 11.5 ppm  | 0.69 ppm (t) J=7.3 Hz (3H)                                                | COSY/TOCSY 9 -> 10                     |
| 11 | 15.1 ppm  | 0.57 ppm (d) J=6.8 Hz (3H)                                                | COSY 7 -> 11                           |
| 12 | -         | 7.34 ppm (d) J=8.9 Hz (1H)                                                | HMBC 12 -> 13                          |
| 13 | 170.8 ppm | -                                                                         | HMBC 14 -> 13                          |
| 14 | 61.2 ppm  | 4.49 ppm (dd) J=10.4, 5.1 Hz (1H)                                         | COSY/TOCSY 14 -> 15 / HMBC 14 -> 24    |
| 15 | 40.3 ppm  | 2.60 ppm (dd) J=13.8, 10.5 Hz (1H) ; 2.08 ppm (dd) J=13.8, 5.1 Hz (1H)    | HMBC 42 -> 15 / HMBC 15' -> 24         |
| 16 | 57.6 ppm  | -                                                                         | HMBC 14, 15, 18, 42 -> 16              |
| 17 | 137.6 ppm | -                                                                         | HMBC 21 -> 17                          |
| 18 | 124.9 ppm | 7.13 ppm (d) J=2.1 Hz (1H)                                                | HMBC 18 -> 16 / TOCSY 18 -> 20, 21     |
| 19 | 109.5 ppm | -                                                                         | HMBC 18, 20 (slight), 21 -> 19         |
| 20 | 130.3 ppm | 7.16 ppm (dd) J= 8.2, 2.2 Hz (1H)                                         | HMBC 18 -> 20                          |
| 21 | 111.0 ppm | 6.50 ppm (d) J= 8.3 Hz (1H)                                               | COSY TOCSY 20 -> 21                    |
| 22 | 146.6 ppm | -                                                                         | HMBC 18, 20 -> 22                      |
| 23 | -         | Not Observed                                                              | -                                      |
| 24 | 81.4 ppm  | 6.08 ppm (s) (1H)                                                         | Aminal (distinctive)                   |
| 25 | -         | -                                                                         | -                                      |
| 26 | 171.0 ppm | -                                                                         | HMBC 27 -> 26                          |
| 27 | 51.1 ppm  | 5.08 ppm (dt) 8.4, 5.9 Hz (1H)                                            | COSY 30 -> 27                          |
| 28 | 62.9 ppm  | 3.64-3.61 ppm (m) (1H)                                                    | COSY 27 -> 28                          |
| 29 | -         | Not Observed                                                              | -                                      |
| 30 | -         | 7.63 ppm (d) J= 8.2 Hz (1H)                                               | HMBC 30 -> 31                          |
| 31 | 171.8 ppm | -                                                                         | HMBC 32, 33 -> 31                      |
| 32 | 37.6 ppm  | 2.42 ppm (dt) J=12.4, 3.1 Hz (1H) ; 2.24 ppm (ddd) 12.8, 5.4, 4.0 Hz (1H) | COSY/TOCSY 33 -> 32                    |
| 33 | 31.1 ppm  | 2.95-2.90 ppm (m) (1H) ; 2.69-2.65 ppm (m) (1H)                           | HMBC 33 -> 34                          |
| 34 | 140.6 ppm | -                                                                         | HMBC 36 -> 34                          |
| 35 | 127.3 ppm | 7.02 ppm (d) J=6.9 Hz (1H)                                                | COSY/TOCSY 36 -> 35 / HMBC 35 -> 34/37 |
| 36 | 128.6 ppm | 7.18 ppm (t) J=7.3 Hz (1H)                                                | HMBC 36 -> 34, 38                      |
| 37 | 123.9 ppm | 7.11 ppm (d) J=7.7 Hz (1H)                                                | COSY 36->37 / HMBC 37 -> 40            |
| 38 | 137.1 ppm | -                                                                         | HMBC 41 -> 38                          |
| 39 | 125.6 ppm | 7.10 ppm (br s) (1H)                                                      | HMBC 39 -> 40                          |
| 40 | 133.4 ppm | 6.60 ppm (d) J=15.7 Hz (1H)                                               |                                        |
| 41 | 125.4 ppm | 6.07 ppm (dt) J=15.7, 7.8 Hz (1H)                                         |                                        |
| 42 | 39.6 ppm  | 2.88 ppm (dd) J=12.9, 8.1 Hz (1H) ; 2.51-2.47 ppm (m) (1H)                | COSY 41 -> 42 / TOCSY 40 -> 42         |

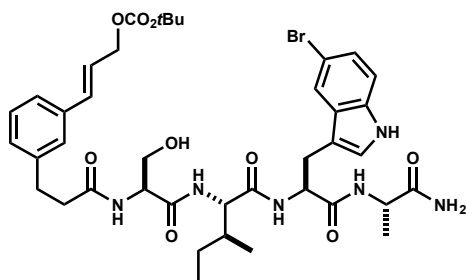

**Acyclic Cinnamyl Carbonate 14:** Synthesized according to Procedure A. Purified via trituration with 3x5 mL methanol. Beige Solid. <sup>1</sup>H-NMR (DMSO-*d*<sub>6</sub>, 500 MHz): δ 11.00 (d, *J* = 2.5 Hz, 1H), 7.96 (d, *J* = 7.8 Hz, 1H), 7.89 (d, *J* = 8.3 Hz, 1H), 7.84 (d, *J* = 7.5 Hz, 1H), 7.83 (d, *J* = 7.9 Hz, 1H), 7.74 (d, *J* = 1.8 Hz, 1H), 7.26-7.30 (m, 1H), 7.26 (br. s, 1H), 7.23-7.24 (m, 1H), 7.21 (t, *J* = 7.6 Hz, 1H), 7.17 (d, *J* = 2.3 Hz, 1H), 7.14 (d, *J* = 2 Hz, 1H), 7.13 (d, *J* = 2 Hz, 1H), 7.1 (br. d, *J* = 7.5 Hz, 1H), 7.07 (br. s, 1H), 6.99 (br. s, 1H), 6.61 (d, *J* = 15.9 Hz, 1H), 6.32 (dt, *J* = 15.6, 6.2 Hz, 1H), 4.65 (dd, *J* = 6.3, 6.2 Hz, 2H), 4.5 (ddd, *J* = 9.2, 8.2, 5.0 Hz, 1H), 4.41 (apt q, *J* = 6.7 Hz, 1H), 4.15 (dddd, *J* = 7.2, 7.2, 7.2, 7.2 Hz, 1H), 4.07 (dd, *J* = 7.8, 6.2 Hz, 1H), 3.56 (dd, *J* = 10.4, 6.0 Hz, 1H), 3.51 (dd, *J* = 10.4, 6.3 Hz, 1H), 3.11 (dd, *J* = 14.9, 4.8 Hz, 1H), 2.85 (dd, *J* = 14.7, 9.4 Hz, 1H), 2.78 (app t, *J* = 7.9 Hz, 2H), 2.43-2.49 (m, 3H), 1.60-2.49 (m, 1H), 1.41 (s, 9H), 1.19 (d, *J* = 7 Hz, 3H), 1.08-1.16 (m, 1H), 0.90-1.00 (m, 1H), 0.65 (d, *J* = 6.7 Hz, 3H). <sup>13</sup>C-NMR (DMSO-*d*<sub>6</sub>, 126 MHz): δ 174.4, 172.1, 171.3, 171.3, 171.2, 153.3, 142.2, 136.3, 135.2, 133.9, 129.5, 129.1, 128.5, 126.9, 126.0, 124.7, 123.8, 121.2, 113.7, 111.5, 110.3, 82.0, 67.4, 62.2, 58.0, 55.0, 53.6, 48.7, 37.1, 36.7, 31.4, 27.85, 27.78, 27.6, 24.3, 18.6, 15.7, 11.7. MS *m/z* 841.4 (calc'd: C<sub>40</sub>H<sub>53</sub>BrN<sub>6</sub>O<sub>9</sub>, [M+H]<sup>+</sup>, 841.1).

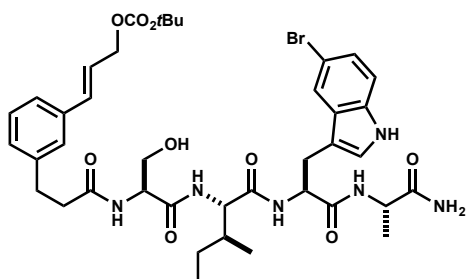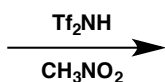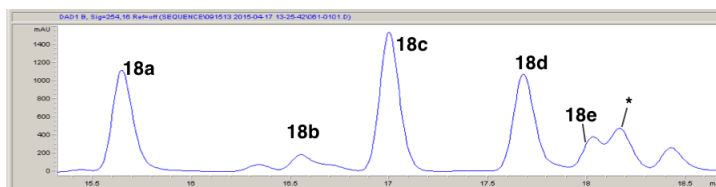

\*Unidentified isomeric product

MS *m/z* 723.3 (calc'd: C<sub>45</sub>H<sub>42</sub>FN<sub>6</sub>O<sub>5</sub>, [M+H]<sup>+</sup>, 723.2).

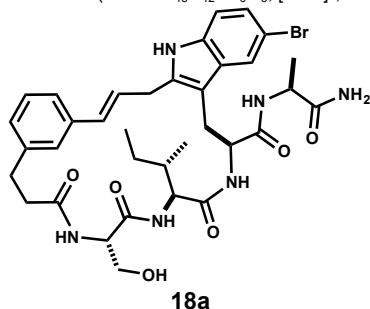

18a

MS *m/z* 723.2 (calc'd: C<sub>45</sub>H<sub>42</sub>FN<sub>6</sub>O<sub>5</sub>, [M+H]<sup>+</sup>, 723.2).

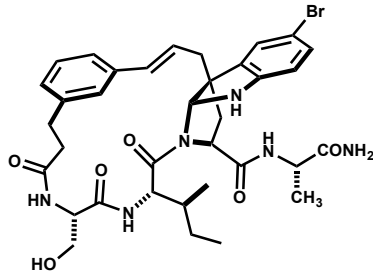

18c

MS *m/z* 723.1 (calc'd: C<sub>45</sub>H<sub>42</sub>FN<sub>6</sub>O<sub>5</sub>, [M+H]<sup>+</sup>, 723.2).

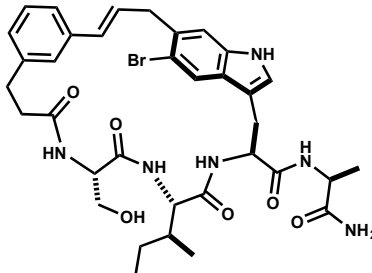

18d

MS *m/z* 723.2 (calc'd: C<sub>45</sub>H<sub>42</sub>FN<sub>6</sub>O<sub>5</sub>, [M+H]<sup>+</sup>, 723.2).

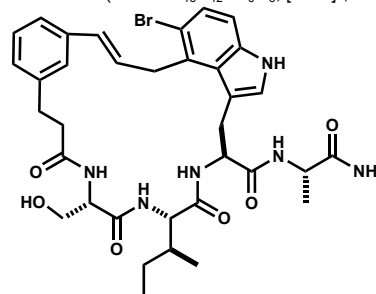

18b

MS *m/z* 723.1 (calc'd: C<sub>45</sub>H<sub>42</sub>FN<sub>6</sub>O<sub>5</sub>, [M+H]<sup>+</sup>, 723.2).

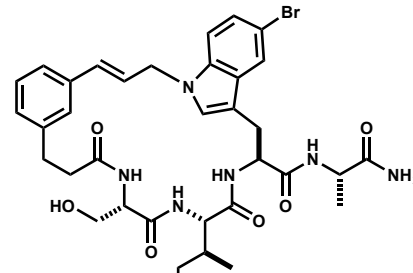

18e

**Analytical HPLC Method**  
Column: Waters Sunfire™ C<sub>18</sub>,  
4.6x250 mm, 5 μm  
Solvent A: H<sub>2</sub>O + 0.1% TFA  
Solvent B: ACN + 0.1% TFA  
Flow rate: 1.00 mL/min

| Time | %B |
|------|----|
| 0    | 30 |
| 2.5  | 30 |
| 24   | 86 |
| 29   | 30 |

**Preparative HPLC Method**  
Column: Waters Sunfire™ C<sub>18</sub>,  
19x250 mm, 5 μm  
Solvent A: H<sub>2</sub>O + 0.1% TFA  
Solvent B: ACN + 0.1% TFA  
Flow rate: 18.0 mL/min

| Time | %B |
|------|----|
| 0    | 35 |
| 4    | 45 |
| 18   | 57 |
| 18.5 | 35 |

Macrocyclic Product **18a**

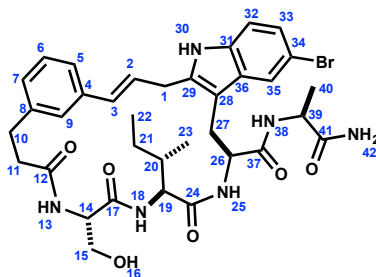

(500 MHz, DMSO-*d*<sub>6</sub>, 298K)

|    | <b>13C</b> | <b>1H</b>                                                  | <b>key correlation</b>          |
|----|------------|------------------------------------------------------------|---------------------------------|
| 1  | 29.6       | 3.62-3.68 (m, 1H), 3.70-3.76 (m, 1H)                       | HMBC 1->29, 28                  |
| 2  | 126.7      | 6.53-6.60 (m, 1H) overlap                                  | COSY 2->1                       |
| 3  | 131.4      | 6.53-6.60 (m, 1H) overlap                                  |                                 |
| 4  | 136.8      | -                                                          |                                 |
| 5  | 123.6      | 7.16-7.20 (m, 1H) overlap                                  |                                 |
| 6  | 127.9      | 7.17-7.21 (m, 1H) overlap                                  |                                 |
| 7  | 127.4      | 7.02-7.06 (m, 1H)                                          | HMBC 7->5                       |
| 8  | 141.4      | -                                                          |                                 |
| 9  | 125.3      | 7.31 (br s, 1H) overlap                                    | HMBC 9->3,5                     |
| 10 | 29.9       | 2.68-2.75 (m, 1H), 3.02-3.10 (m, 1H) overlap               | HMBC 10->7,8,9                  |
| 11 | 35.1       | 2.41 (ddd, J = 14.9, 9.2, 2.2 Hz, 1H), 2.58-2.65 (m, 1H)   |                                 |
| 12 | 171.5      | -                                                          |                                 |
| 13 | -          | 8.11 (d, J = 8.4 Hz, 1H)                                   |                                 |
| 14 | 55.3       | 4.25 (ddd, J = 8.4, 5.5, 5.5 Hz, 1H)                       |                                 |
| 15 | 61.4       | 3.46-3.54 (m, 2H)                                          |                                 |
| 16 | -          | not observed                                               |                                 |
| 17 | 169.4      | -                                                          |                                 |
| 18 | -          | 7.29-7.32 (m, 1H) overlap                                  | HMBC 18->17                     |
| 19 | 56.6       | 4.06 (dd, J = 8.0, 6.6 Hz, 1H)                             |                                 |
| 20 | 37.3       | 1.60-1.69 (m, 1H)                                          |                                 |
| 21 | 23.4       | 0.88-0.98 (m, 1H), 1.22-1.33 (m, 1H)                       |                                 |
| 22 | 10.9       | 0.71 (t, J = 7.4 Hz, 3H)                                   |                                 |
| 23 | 15.0       | 0.68 (d, J = 6.7 Hz, 3H)                                   |                                 |
| 24 | 170.3      | -                                                          |                                 |
| 25 | -          | 8.25 (d, J = 8.8 Hz, 1H)                                   |                                 |
| 26 | 53.6       | 4.60 (ddd, J = 9.0, 8.8, 5.9 Hz, 1H)                       | HMBC 26->28                     |
| 27 | 26.1       | 2.91 (dd, J = 14.4, 9.4 Hz, 1H), 3.04-3.10 (m, 1H) overlap | HMBC 27->28,29,36               |
| 28 | 105.9      | -                                                          |                                 |
| 29 | 136.6      | -                                                          |                                 |
| 30 | -          | 10.94 (s, 1H)                                              |                                 |
| 31 | 133.6      | -                                                          |                                 |
| 32 | 112.3      | 7.17 (d, J = 8.6 Hz, 1H)                                   | HMBC 32->36                     |
| 33 | 122.4      | 7.06 (dd, J = 8.6, 1.9 Hz, 1H)                             | HMBC 33->31,34, TOCSY 33->32,35 |
| 34 | 110.6      | -                                                          |                                 |
| 35 | 120.1      | 7.70 (d, J = 1.9 Hz, 1H)                                   | HMBC 35->28,31,33,34            |
| 36 | 130.1      | -                                                          |                                 |
| 37 | 170.6      | -                                                          |                                 |
| 38 | -          | 7.84 (d, J = 7.5 Hz, 1H)                                   |                                 |
| 39 | 18.3       | 1.20 (d, J = 7.1 Hz, 3H)                                   |                                 |
| 40 | 47.9       | 4.17 (dq, J = 7.1, 7.1 Hz, 1H)                             |                                 |
| 41 | 173.5      | -                                                          |                                 |
| 42 | -          | 7.00 (br s, 1H), 7.20 (br s, 1H)                           | TOCSY 42->42', HMBC 42->41      |

Macrocyclic Product **18b**

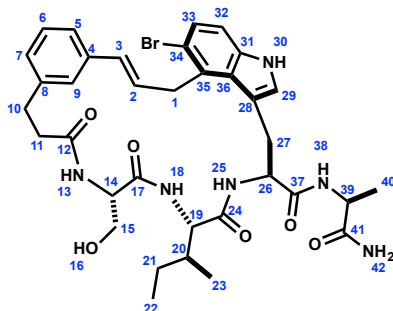

(500 MHz, DMSO-*d*<sub>6</sub>, 298K)

\*Note: This isolated compound was contaminated O-*tert*-butoxycarbonyl(cinnamyl alcohol 3-propionic acid)

|    | <b>13C</b> | <b>1H</b>                                                       | <b>key correlation</b>     |
|----|------------|-----------------------------------------------------------------|----------------------------|
| 1  | 34.9       | 3.93-3.99 (m, 1H), 4.23-4.28 (m, 1H) overlap                    | COSY 1→1', HMBC 1→34,35,36 |
| 2  | 128.4      | 6.45 (ddd, <i>J</i> = 16.06, 6.0, 5.5 Hz, 1H)                   | HMBC 2→4                   |
| 3  | 129.8      | 6.20 (br d, <i>J</i> = 16.0 Hz, 1H)                             | HMBC 3→4                   |
| 4  | 137        | -                                                               |                            |
| 5  | 122.9      | 7.00 (br d, <i>J</i> = 7.5 Hz, 1H)                              | HMBC 5→3                   |
| 6  | 127.9      | 7.10 (dd, <i>J</i> = 7.5, 7.5 Hz, 1H)                           | HMBC 6→4,8, TOCSY 6→5,7,9  |
| 7  | 127.3      | 6.99 (br d, <i>J</i> = 7.5 Hz, 1H) overlap                      |                            |
| 8  | 141.3      | -                                                               |                            |
| 9  | 124.6      | 7.22 (br s, 1H)                                                 | HMBC 9→3                   |
| 10 | 28.9       | 2.68-2.74 (m, 1H) overlap, 3.01-3.05 (m, 1H) overlap            | HMBC 10→7,8,9,12           |
| 11 | 34.3       | 2.48-2.53 (m, 1H) obscured, 2.66-2.72 (m, 1H) overlap           | HMBC 11→9,12               |
| 12 | 171.5      | -                                                               |                            |
| 13 | -          | 8.10 (d, <i>J</i> = 8.3 Hz, 1H)                                 | HMBC 13→12, COSY 13→14     |
| 14 | 56.1       | 4.23-4.27 (m, 1H) overlap                                       | HMBC 14→15,16              |
| 15 | 62         | 3.50-3.55 (m, 1H), 3.60 (ddd, <i>J</i> = 11.0, 5.7, 5.7 Hz, 1H) | HMBC 15→16                 |
| 16 | 169.3      | -                                                               |                            |
| 17 | -          | 4.90 (dd, <i>J</i> = 5.7, 5.7 Hz, 1H)                           | HMBC 17→14,15              |
| 18 | -          | 7.34 (d, <i>J</i> = 8.3 Hz, 1H)                                 | HMBC 18→16, COSY 18→19     |
| 19 | 56.3       | 4.30 (dd, <i>J</i> = 8.3, 7.4 Hz, 1H)                           | COSY 19→20, HMBC 19→24     |
| 20 | 37.1       | 1.65-1.72 (m, 1H)                                               | COSY 20→21,23              |
| 21 | 23.9       | 0.98-1.06 (m, 1H), 1.39-1.48 (m, 1H)                            |                            |
| 22 | 10.9       | 0.79 (t, <i>J</i> = 7.3 Hz, 3H)                                 | COSY 22→21                 |
| 23 | 14.8       | 0.80 (d, <i>J</i> = 6.6 Hz, 3H)                                 |                            |
| 24 | 170.2      | -                                                               |                            |
| 25 | -          | 8.34 (d, <i>J</i> = 7.3 Hz, 1H)                                 | HMBC 25→24, COSY 25→26     |
| 26 | 54.3       | 4.61 (ddd, <i>J</i> = 7.8, 7.8, 7.3 Hz, 1H)                     | HMBC 26→28, COSY 26→27     |
| 27 | 29.1       | 3.09-3.14 (m, 2H)                                               | HMBC 27→28                 |
| 28 | 109.6      | -                                                               |                            |
| 29 | 126.1      | 7.06 (d, <i>J</i> = 2.5 Hz, 1H)                                 | HMBC 29→28,31,36           |
| 30 | -          | 11.06 (d, <i>J</i> = 2.5 Hz, 1H)                                |                            |
| 31 | 135.6      | -                                                               |                            |
| 32 | 111.8      | 7.18 (d, <i>J</i> = 8.6 Hz, 1H)                                 | HMBC 32→31,34,36           |
| 33 | 124.6      | 7.26 (d, <i>J</i> = 8.6 Hz, 1H)                                 | HMBC 33→31                 |
| 34 | 114.9      | -                                                               |                            |
| 35 | 129.7      | -                                                               |                            |
| 36 | 126.6      | -                                                               |                            |
| 37 | 169.5      | -                                                               |                            |
| 38 | -          | 7.78 (d, <i>J</i> = 7.6 Hz, 1H)                                 | HMBC 38→37                 |
| 39 | 18.1       | 4.16 (dq, <i>J</i> = 7.6, 7.0 Hz, 1H)                           |                            |
| 40 | 47.8       | 1.14 (d, <i>J</i> = 7.0 Hz, 1H)                                 |                            |
| 41 | 173.3      | -                                                               |                            |
| 42 | -          | 6.90 (br s, 1H), 6.91 (br s, 1H)                                | HMBC 42→41                 |

Macrocyclic Product **18c**

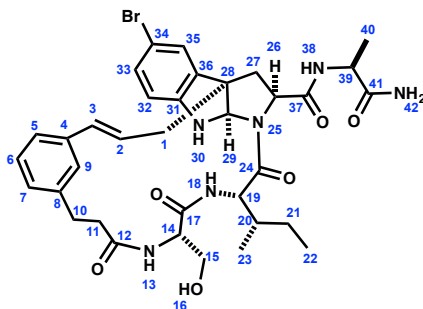

(500 MHz, DMSO-*d*<sub>6</sub>, 298K)

|    | <b>13C</b> | <b>1H</b>                                                                 | <b>key correlation</b>                |
|----|------------|---------------------------------------------------------------------------|---------------------------------------|
| 1  | 39.5       | 2.51-2.55 (m, 2H)                                                         | HMBC 1->28,29 ; NOESY 1->29           |
| 2  | 124.1      | 6.18 (ddd, J = 15.7, 8.2, 7.0 Hz, 1H)                                     | COSY 2->1, HMBC 2->4                  |
| 3  | 134.3      | 6.57 (d, J = 15.7 Hz, 1H)                                                 |                                       |
| 4  | 136.8      | -                                                                         |                                       |
| 5  | 124.4      | 7.03 (br d, J = 7.6 Hz, 1H)                                               | HMBC 5->3, TOCSY 5->6,7,9             |
| 6  | 128.0      | 7.16 (dd, J = 7.6, 7.6 Hz, 1H)                                            | HMBC 6->4,8                           |
| 7  | 127.5      | 7.01 (br d, J = 7.6 Hz, 1H)                                               |                                       |
| 8  | 141.4      | -                                                                         |                                       |
| 9  | 124.5      | 7.38 (br s, 1H)                                                           | HMBC 9->3                             |
| 10 | 29.8       | 2.75 (apt dd, J = 14.0, 9.8 Hz, 1H), 3.02 (apt dd, J = 14.0, 10.7 Hz, 1H) | HMBC 10->7,9,12                       |
| 11 | 35.8       | 2.31-2.36 (m, 1H) overlap, 2.47-2.54 (m, 1H) overlap                      |                                       |
| 12 | 171.3      | -                                                                         |                                       |
| 13 | -          | 7.98 (d, J = 7.9 Hz, 1H)                                                  | HMBC 13->12                           |
| 14 | 54.7       | 4.35 (ddd, J = 7.9, 7.0, 5.4 Hz, 1H)                                      | COSY 14->13                           |
| 15 | 61.5       | 3.54 (dd, J = 10.7, 7.0 Hz, 1H), 3.60 (dd, J = 10.7, 5.4 Hz, 1H)          | COSY 15->14                           |
| 16 | -          | not observed                                                              |                                       |
| 17 | 170.2      | -                                                                         |                                       |
| 18 | -          | 8.03 (d, J = 6.1 Hz, 1H)                                                  | HMBC 18->17                           |
| 19 | 55.6       | 4.23 (dd, J = 9.1, 6.1 Hz, 1H)                                            | HMBC 19->24                           |
| 20 | 36.4       | 1.71-1.77 (m, 1H) overlap                                                 | COSY 20->19                           |
| 21 | 24.1       | 1.18-1.25 (m, 1H), 1.66-1.73 (m, 1H) overlap                              |                                       |
| 22 | 11.0       | 0.89 (t, J = 7.5 Hz, 3H)                                                  | COSY 22->21                           |
| 23 | 14.8       | 0.99 (d, J = 6.8 Hz, 3H)                                                  | COSY 23->20                           |
| 24 | 172.3      | -                                                                         |                                       |
| 25 | -          | -                                                                         |                                       |
| 26 | 60.3       | 4.42 (dd, J = 8.7, 6.3 Hz, 1H)                                            | COSY 26->27, HMBC 26->24 NOESY 26->29 |
| 27 | 38.3       | 2.09 (dd, J = 13.0, 6.3 Hz, 1H), 2.32-2.37 (m, 1H) overlap                | HMBC 27->26,28,29,37                  |
| 28 | 56.8       | -                                                                         |                                       |
| 29 | 80.8       | 6.35 (s, 1H)                                                              | HMBC 29->1,24,27,31,36                |
| 30 | -          | not observed                                                              |                                       |
| 31 | 147.8      | -                                                                         |                                       |
| 32 | 111.1      | 6.50 (d, J = 8.3 Hz, 1H)                                                  | HMBC 32->34,36                        |
| 33 | 130.6      | 7.14 (dd, J = 8.3, 2.1 Hz, 1H)                                            | HMBC 33->31                           |
| 34 | 108.8      | -                                                                         |                                       |
| 35 | 124.9      | 7.31 (d, J = 2.1 Hz, 1H)                                                  | HMBC 35->31                           |
| 36 | 136.7      | -                                                                         |                                       |
| 37 | 169.4      | -                                                                         |                                       |
| 38 | -          | 7.33 (d, J = 7.1 Hz, 1H)                                                  |                                       |
| 39 | 47.4       | 3.98 (dq, J = 7.1, 6.8 Hz, 1H)                                            | HMBC 39->41                           |
| 40 | 17.9       | 0.83 (d, J = 6.8 Hz, 3H)                                                  | COSY 40->39, HMBC 40->41              |
| 41 | 173.3      | -                                                                         |                                       |
| 42 | -          | 6.90 (br s, 1H), 7.38 (br s, 1H)                                          | HMBC 42->41, TOCSY 42->42'            |

Macrocyclic Product **18d**

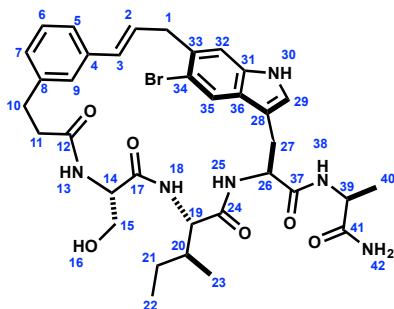

(500 MHz, DMSO- $d_6$ , 340K)

|    | <b>13C</b>   | <b>1H</b>                                                        | <b>key correlation</b> |
|----|--------------|------------------------------------------------------------------|------------------------|
| 1  | 38.0         | 3.68 (apt d, J = 4.1 Hz, 2H)                                     |                        |
| 2  | 129.0        | 6.38 (ddd, J = 16.0, 5.9, 5.9 Hz, 1H)                            | HMBC 2->4              |
| 3  | 129.4        | 6.16 (br d, J = 16.0 Hz, 1H)                                     | HMBC 3->5,9            |
| 4  | 136.8        | -                                                                |                        |
| 5  | 123.1        | 7.18 (d, J = 8.0 Hz, 1H) overlap                                 |                        |
| 6  | 127.6        | 7.16 (dd, J = 8.0, 8.0 Hz, 1H) overlap                           | HMBC 6->4,9            |
| 7  | 126.8        | 6.97 (br d, J = 8.0 Hz, 1H)                                      |                        |
| 8  | 140.6        | -                                                                |                        |
| 9  | 124.4        | 7.03 (br s, 1H)                                                  | HMBC 9->3,5,7,10       |
| 10 | 29.3         | 2.78 (ddd, J = 14.8, 7.8, 3.5 Hz, 1H), 2.83-2.89 (m, 1H) overlap |                        |
| 11 | 34.7         | 2.32 (ddd, J = 14.9, 7.8, 3.5 Hz, 1H), 2.50-2.56 (m, 1H)         | HMBC 11->12            |
| 12 | 171.4        | -                                                                |                        |
| 13 | -            | 7.46 (d, J = 7.4 Hz, 1H)                                         |                        |
| 14 | 53.9         | 4.12 (apt dd, J = 11.9, 6.0 Hz, 1H)                              |                        |
| 15 | 61.6         | 3.03 (dd, J = 10.8, 6.0 Hz, 1H), 2.84-2.89 (m, 1H) overlap       |                        |
| 16 | -            | not observed                                                     |                        |
| 17 | not observed | -                                                                |                        |
| 18 | -            | 7.38-7.42 (m, 1H) overlap                                        |                        |
| 19 | 56.8         | 4.03 (dd, J = 7.9, 6.4 Hz, 1H)                                   | HMBC 19->24            |
| 20 | 35.8         | 1.72-1.80 (m, 1H)                                                |                        |
| 21 | 23.4         | 0.99-1.08 (m, 1H), 1.30-1.38 (m, 1H)                             |                        |
| 22 | 10.5         | 0.80 (t, J = 7.4 Hz, 3H)                                         |                        |
| 23 | 14.8         | 0.84 (d, J = 6.8 Hz, 3H)                                         |                        |
| 24 | 170.0        | -                                                                |                        |
| 25 | -            | 7.38-7.42 (m, 1H) overlap                                        |                        |
| 26 | 52.9         | 4.62 (apt dd, J = 14.4, 7.5 Hz, 1H)                              | HMBC 26->37            |
| 27 | 26.5         | 3.08-3.12 (m, 1H) obscured                                       | HMBC 27->28,37         |
| 28 | 108.8        | -                                                                |                        |
| 29 | 125.0        | 7.15 (br s, 1H) overlap                                          | HMBC 29->28,31,36      |
| 30 | -            | 10.69 (br s, 1H)                                                 | HMBC 30->31            |
| 31 | 135.4        | -                                                                |                        |
| 32 | 113.0        | 7.32 (s, 1H)                                                     | HMBC 32->1,36          |
| 33 | 130.0        | -                                                                |                        |
| 34 | 113.6        | -                                                                |                        |
| 35 | 121.7        | 7.83 (s, 1H)                                                     | HMBC 35->28,31,33,34   |
| 36 | 127.4        | -                                                                |                        |
| 37 | 170.3        | -                                                                |                        |
| 38 | -            | 7.60 (br s, 1H)                                                  |                        |
| 39 | 47.6         | 4.29 (qd, J = 7.1, 7.0 Hz, 1H)                                   | HMBC 39->37,41         |
| 40 | 17.6         | 1.23 (d, J = 7.1 Hz, 3H)                                         | HMBC 40->41            |
| 41 | 173.4        | -                                                                |                        |
| 42 | -            | 6.82 (br s, 1H), 7.06 (br s, 1H)                                 |                        |

Macrocyclic Product **18e**

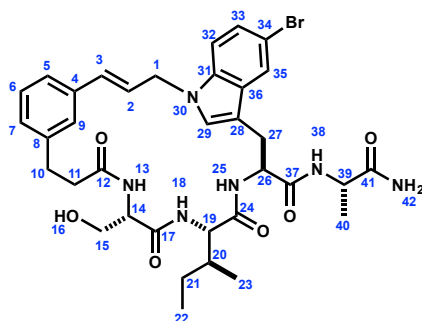

(500 MHz, DMSO-*d*<sub>6</sub>, 298K)

|    | <b>13C</b> | <b>1H</b>                                                         | <b>key correlation</b>      |
|----|------------|-------------------------------------------------------------------|-----------------------------|
| 1  | 47.5       | 4.83-4.90 (m, 2H)                                                 | HMBC 1->2,3,29,31           |
| 2  | 124.7      | 6.59-6.67 (m, 1H) overlap                                         | HMBC 2->4                   |
| 3  | 132.6      | 6.59-6.67 (m, 1H) overlap                                         |                             |
| 4  | 136.2      | -                                                                 |                             |
| 5  | 124.5      | 7.16-7.20 (m, 1H) overlap                                         | HMBC 5->3                   |
| 6  | 127.9      | 7.20 (dd, J = 7.5, 7.3 Hz, 1H) overlap                            | HMBC 6->4,8                 |
| 7  | 128.1      | 7.04 (ddd, J = 7.3, 1.5, 1.5 Hz, 1H)                              |                             |
| 8  | 141.5      | -                                                                 |                             |
| 9  | 124.7      | 7.41 (br s, 1H)                                                   | HMBC 9->3, TOCSY 9->5,6,7   |
| 10 | 29.6       | 2.70-2.76 (m, 1H), 2.94-3.00 (m, 1H) overlap                      | HMBC 10->7,8,9              |
| 11 | 34.7       | 2.42 (ddd, J = 14.5, 8.5, 2.7 Hz, 1H), 2.46-2.51 (m, 1H) obscured | HMBC 11->8                  |
| 12 | 171.4      | -                                                                 |                             |
| 13 | -          | 7.87 (d, J = 7.4 Hz, 1H)                                          |                             |
| 14 | 54.5       | 4.22-4.27 (m, 1H) overlap                                         | HMBC 14->17                 |
| 15 | 61.4       | 3.34-3.40 (m, 2H) obscured                                        | HMBC 15->17                 |
| 16 | -          | not observed                                                      |                             |
| 17 | 170.0      | -                                                                 | HMBC 18->17                 |
| 18 | -          | 7.70 (d, J = 8.0 Hz, 1H)                                          | HMBC 19->24                 |
| 19 | 57.1       | 4.01 (dd, J = 8.0, 7.1 Hz, 1H)                                    |                             |
| 20 | 35.9       | 1.60-1.68 (m, 1H)                                                 |                             |
| 21 | 23.6       | 0.95-1.02 (m, 1H), 1.27-1.34 (m, 1H)                              |                             |
| 22 | 10.7       | 0.73 (dd, J = 7.6, 7.6 Hz, 3H) overlap                            |                             |
| 23 | 15.0       | 0.72 (d, J = 7.1 Hz, 3H) overlap                                  |                             |
| 24 | 171.2      | -                                                                 |                             |
| 25 | -          | 7.98 (d, J = 8.2 Hz, 1H)                                          | HMBC 25->24,27              |
| 26 | 52.2       | 4.56 (ddd, J = 8.6, 8.2, 4.8 Hz, 1H)                              | HMBC 26->37, COSY 26->25,27 |
| 27 | 26.5       | 2.99-3.94 (m, 2H) overlap                                         |                             |
| 28 | 109.2      | -                                                                 |                             |
| 29 | 128.6      | 7.35 (s, 1H)                                                      | HMBC 29->1,27,31,36         |
| 30 | -          | -                                                                 |                             |
| 31 | 134.5      | -                                                                 |                             |
| 32 | 111.4      | 7.44 (d, J = 8.7 Hz, 1H)                                          | HMBC 32->34,36              |
| 33 | 123.1      | 7.21 (dd, J = 8.7, 1.9 Hz, 1H)                                    | HMBC 33->31,35              |
| 34 | 111.1      | -                                                                 |                             |
| 35 | 120.9      | 7.78 (d, J = 1.9 Hz, 1H)                                          | HMBC 35->31,33              |
| 36 | 129.3      | -                                                                 |                             |
| 37 | 170.9      | -                                                                 |                             |
| 38 | -          | 7.94 (d, J = 7.3 Hz, 1H)                                          | HMBC 38->37                 |
| 39 | 47.8       | 4.21 (dq, J = 7.3, 7.2 Hz, 1H)                                    | HMBC 39->41                 |
| 40 | 18.1       | 1.17 (d, J = 7.2 Hz, 1H)                                          | HMBC 40->39                 |
| 41 | 173.8      | -                                                                 |                             |
| 42 | -          | 7.02 (br s, 1H), 7.32 (br s, 1H)                                  |                             |

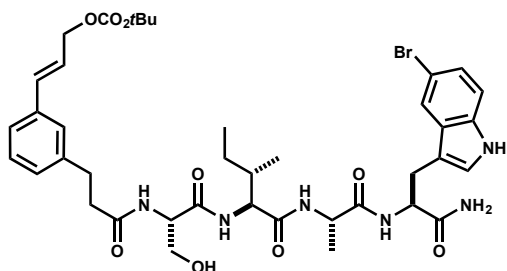

**Acyclic Cinnamyl Carbonate 15:** Synthesized according to Procedure A. Purified via trituration with 3x5 mL methanol. Beige solid.  $^1\text{H-NMR}$  (DMSO- $d_6$ , 500 MHz):  $\delta$ 10.99 (d,  $J = 1.7$  Hz, 1H), 7.99 (d,  $J = 6.7$  Hz, 1H), 7.98 (d,  $J = 7.5$  Hz, 1H), 7.76 (d,  $J = 8.2$  Hz, 1H), 7.75 (d,  $J = 8.3$  Hz, 1H), 7.74 (d,  $J = 1.7$  Hz, 1H), 7.32 (br s, 1H), 7.28 (br s, 1H), 7.26 (d,  $J = 8.5$  Hz, 1H), 7.25 (d,  $J = 7.2$  Hz, 1H), 7.21 (dd,  $J = 7.5, 7.5$  Hz, 1H), 7.17 (d,  $J = 1.9$  Hz, 1H), 7.12 (dd,  $J = 8.6, 1.7$  Hz, 1H), 7.10 (d,  $J = 7.3$  Hz, 1H), 7.03 (br s, 1H), 6.61 (d,  $J = 16.0$  Hz, 1H), 6.31 (ddd,  $J = 15.9, 6.2, 6.2$  Hz, 1H), 5.00 (dd,  $J = 5.3, 5.3$  Hz, 1H), 4.64 (d,  $J = 6.0$  Hz, 1H), 4.39-4.34 (m, 1H), 4.22 (pentet,  $J = 7.1$  Hz, 1H), 4.16 (dd,  $J = 7.9, 6.7$  Hz, 1H), 3.55-3.46 (m, 2H), 3.04 (dd,  $J = 14.6, 5.7$  Hz, 1H), 2.91 (dd,  $J = 14.7, 7.8$  Hz, 1H), 2.78 (dd,  $J = 7.8, 7.8$  Hz, 1H), 2.45 (dd,  $J = 8.6, 7.3$  Hz, 1H), 1.74-1.69 (m, 1H), 1.40 (s, 9H), 1.38-1.33 (m, 1H), 1.14 (d,  $J = 7.0$  Hz, 3H), 1.07-7.01 (m, 1H), 0.77 (d,  $J = 6.9$  Hz, 3H), 0.76 (dd,  $J = 7.9, 7.9$  Hz, 3H).  $^{13}\text{C-NMR}$  (DMSO- $d_6$ , 126 MHz):  $\delta$ 172.9, 171.8, 171.6, 170.6, 170.4, 152.8, 141.7, 135.9, 134.7, 133.5, 129.2, 128.6, 128.0, 126.4, 125.4, 124.2, 123.3, 123.3, 120.8, 113.3, 111.0, 109.9, 81.5, 66.9, 61.7, 57.0, 54.7, 53.6, 53.2, 48.4, 36.6, 31.0, 27.4, 25.2, 24.1, 18.1, 17.8, 15.3, 11.3. MS  $m/z$ , 841.3 (calc'd:  $\text{C}_{35}\text{H}_{44}\text{BrN}_6\text{O}_6$   $[\text{M}+\text{H}]^+$ , 841.1)

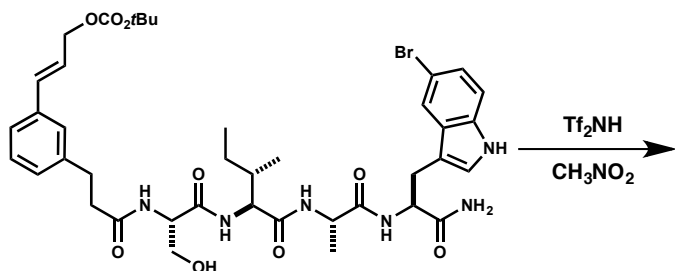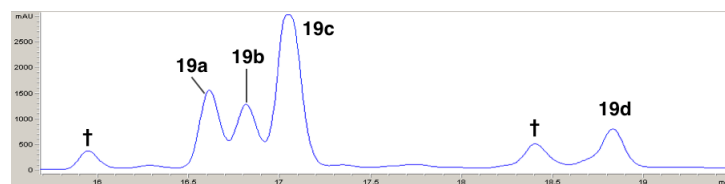

†Non-isomeric products

MS  $m/z$  723.2 (calc'd:  $\text{C}_{45}\text{H}_{42}\text{FN}_6\text{O}_5$ ,  $[\text{M}+\text{H}]^+$ , 723.2).

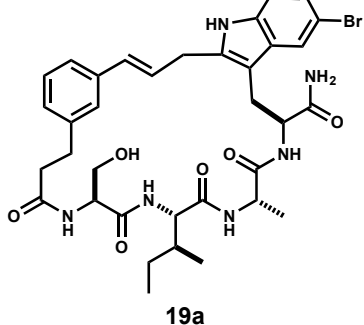

MS  $m/z$  723.2 (calc'd:  $\text{C}_{45}\text{H}_{42}\text{FN}_6\text{O}_5$ ,  $[\text{M}+\text{H}]^+$ , 723.2).

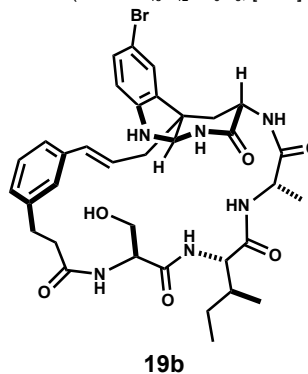

MS  $m/z$  723.2 (calc'd:  $\text{C}_{45}\text{H}_{42}\text{FN}_6\text{O}_5$ ,  $[\text{M}+\text{H}]^+$ , 723.2).

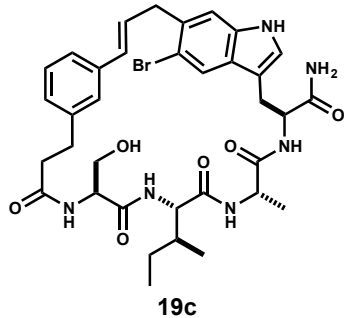

MS  $m/z$  723.2 (calc'd:  $\text{C}_{45}\text{H}_{42}\text{FN}_6\text{O}_5$ ,  $[\text{M}+\text{H}]^+$ , 723.2).

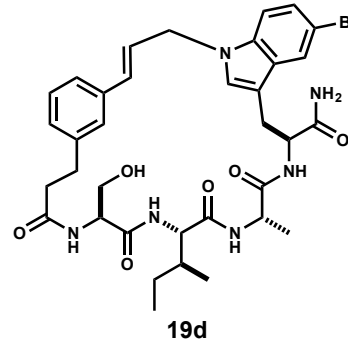



*Analytical HPLC Method*

Column: Waters Sunfire™

C<sub>18</sub>, 4.6x250 mm, 5 μm

Solvent A: H<sub>2</sub>O + 0.1% TFA

Solvent B: ACN + 0.1% TFA

Flow rate: 1.00 mL/min

| Time | %B |
|------|----|
| 0    | 30 |
| 2.5  | 30 |
| 24   | 86 |
| 29   | 30 |

*Preparative HPLC Method*

Column: Waters Sunfire™

C<sub>18</sub>, 19x250 mm, 5 μm

Solvent A: H<sub>2</sub>O + 0.1% TFA

Solvent B: ACN + 0.1% TFA

Flow rate: 18.0 mL/min

| Time | %B |
|------|----|
| 0    | 45 |
| 2    | 45 |
| 12   | 50 |
| 13   | 50 |

*Semi-Prep HPLC Method*

Column: Waters XSelect™

C<sub>18</sub>, 10x250 mm, 5 μm

Solvent A: H<sub>2</sub>O + 0.1% TFA

Solvent B: ACN + 0.1% TFA

Flow rate: 6.00 mL/min

**For re-purification of 19b**

| Time | %B |
|------|----|
| 0    | 38 |
| 1    | 38 |
| 20   | 43 |
| 21   | 38 |

Macrocyclic Isomer 19a

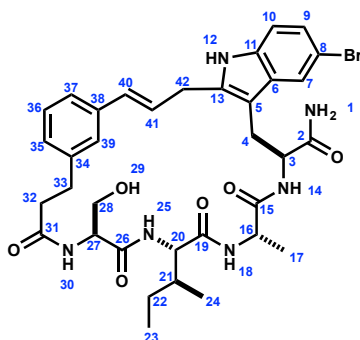

(600 MHz, DMSO-*d*<sub>6</sub>, 298K)

|    | 13C       | 1H                                                                                | key correlation               |
|----|-----------|-----------------------------------------------------------------------------------|-------------------------------|
| 1  | -         | 7.29 ppm (br s) (1H) ; 6.98 ppm (br s)                                            | TOCSY 1 -> 1'                 |
| 2  | 173.0 ppm | -                                                                                 | HMBC 1(slight),3 -> 2         |
| 3  | 53.4 ppm  | 4.40 ppm (ddd) J=7.5, 7.5, 7.5 Hz (1H)                                            | COSY/TOCSY 14 -> 3            |
| 4  | 26.9 ppm  | 3.05 ppm (dd) J=14.7, 7.5 Hz (1H) ; 2.92 ppm (dd) J=14.5, 6.8 Hz (1H)             | COSY/TOCSY 3 -> 4             |
| 5  | 105.8 ppm | -                                                                                 | HMBC 4,7,12,42(slight) -> 5   |
| 6  | 130.0 ppm | -                                                                                 | HMBC 10,12 -> 6               |
| 7  | 120.0 ppm | 7.71 ppm (d) J=1.7 Hz (1H)                                                        | HMBC 7 -> 5,11                |
| 8  | 110.8 ppm | -                                                                                 | HMBC 7,10 -> 8                |
| 9  | 122.3 ppm | 7.08 ppm (dd) J=8.5, 1.9 Hz (1H)                                                  | HMBC 7 -> 9 / 9 -> 7          |
| 10 | 112.3 ppm | 7.19 ppm (d) J=8.2 Hz (1H)                                                        | COSY 9 -> 10 ; HMBC 10 -> 6,8 |
| 11 | 133.7 ppm | -                                                                                 | HMBC 7,9,12 -> 11             |
| 12 | -         | 10.94 ppm (s)                                                                     | indole                        |
| 13 | 136.7 ppm | -                                                                                 | HMBC 4,12,41,42 -> 13         |
| 14 | -         | 7.69 ppm (d) J=8.3 Hz                                                             | HMBC 14 -> 15                 |
| 15 | 171.8 ppm | -                                                                                 | HMBC 16 -> 15                 |
| 16 | 47.5 ppm  | 4.39-4.33 ppm (m) (1H)                                                            | COSY/TOCSY 18 -> 16           |
| 17 | 17.4 ppm  | 1.22 ppm (d) J=7.1 Hz (1H)                                                        | COSY/TOCSY 16 -> 17           |
| 18 | -         | 8.01 ppm (d) J=7.7 Hz (1H)                                                        | HMBC 18 -> 19                 |
| 19 | 169.9 ppm | -                                                                                 | HMBC 20 -> 19                 |
| 20 | 56.6 ppm  | 4.14 ppm (d) J=8.0, 5.8 Hz (1H)                                                   | COSY/TOCSY 25 -> 20           |
| 21 | 36.8 ppm  | 1.70-1.66 ppm (m) (1H)                                                            | TOCSY 20 -> 21                |
| 22 | 23.7 ppm  | 1.33-1.28 ppm (m) (1H) ; 1.05-0.98 ppm (m) (1H)                                   | TOCSY 21 -> 22                |
| 23 | 11.1 ppm  | 0.70 ppm (dd) J=7.4 Hz (3H)                                                       | COSY/TOCSY 22 -> 23           |
| 24 | 15.0 ppm  | 0.76 ppm (d) J=6.8 Hz (3H)                                                        | COSY/TOCSY 21 -> 24           |
| 25 | -         | 7.49 ppm (d) J=7.9 Hz (1H)                                                        | HMBC 25 -> 26                 |
| 26 | 170.2 ppm | -                                                                                 | HMBC 27 -> 26                 |
| 27 | 55.0 ppm  | 4.36-4.32 ppm (m) (1H)                                                            | COSY/TOCSY 30 -> 27           |
| 28 | 61.3 ppm  | 3.50-3.45 ppm (m) (2H)                                                            | COSY/TOCSY 27 -> 28           |
| 29 | -         | not observed                                                                      | -                             |
| 30 | -         | 8.15 ppm (d) J=8.0 Hz (1H)                                                        | HMBC 30 -> 31                 |
| 31 | 172.0 ppm | -                                                                                 | HMBC 32, 33 -> 31             |
| 32 | 34.6 ppm  | 2.67 ppm (ddd) J=14.9, 8.4, 6.6 Hz (1H) ; 2.40 ppm (ddd) J=14.5, 6.4, 6.4 Hz (1H) | HMBC 32 -> 34 ; COSY 33 -> 32 |
| 33 | 30.0 ppm  | 2.89-2.80 ppm (m) (2H)                                                            | HMBC 33 -> 34                 |
| 34 | 141.4 ppm | -                                                                                 | HMBC 32,33,36 -> 34           |
| 35 | 126.9 ppm | 7.03 ppm (d) J=7.4 Hz (1H)                                                        | COSY/TOCSY 36 -> 35           |
| 36 | 128.2 ppm | 7.20 ppm (dd) J=7.8, 7.8 Hz (1H)                                                  | COSY/TOCSY 36 -> 37           |
| 37 | 123.9 ppm | 7.16 ppm (d) J=7.6 Hz (1H)                                                        | HMBC 37 -> 40 / 40 -> 37      |
| 38 | 136.6 ppm | -                                                                                 | HMBC 36,41 -> 38              |
| 39 | 125.0 ppm | 7.37 ppm (s) (1H)                                                                 | TOCSY 39 -> 35,36,37          |
| 40 | 130.7 ppm | 6.54 ppm (d) J=15.7 Hz (1H)                                                       |                               |
| 41 | 126.6 ppm | 6.37 ppm (ddd) J=15.8, 6.8, 6.8 Hz (1H)                                           |                               |
| 42 | 29.3 ppm  | 3.76 ppm (dd) J=16.0, 6.1 Hz (1H) ; 3.62-3.58 ppm (m) (1H)                        | COSY/HMBC 41 -> 42            |

Macrocyclic Product 19b

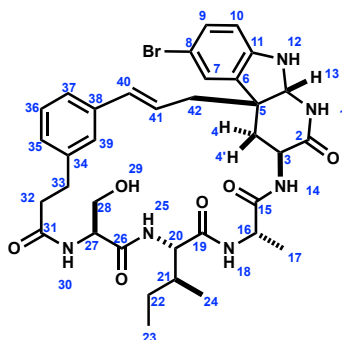

(600 MHz, DMSO-*d*<sub>6</sub>, 298K)

|    | 13C       | 1H                                                                     | key correlation                              |
|----|-----------|------------------------------------------------------------------------|----------------------------------------------|
| 1  | -         | 7.99 ppm (d) J=3.0 Hz (1H)                                             | COSY 12 -> 13 ; HMBC 13 -> 1; HMBC 1 -> 3,5  |
| 2  | 170.4 ppm | -                                                                      | HMBC 3,13 -> 2                               |
| 3  | 46.0 ppm  | 4.11 ppm (ddd) J=12.9, 8.2, 4.6 Hz (1H)                                | COSY/TOCSY 14 -> 3 ; HMBC 3 -> 2             |
| 4  | 35.2 ppm  | 2.09 ppm (dd) J=13.1, 4.4 Hz (1H) ; 1.99 ppm (dd) J=13.1, 13.1 Hz (1H) | COSY/TOCSY 3 -> 4                            |
| 5  | 47.7 ppm  | -                                                                      | HMBC 4,7,12,42 -> 5                          |
| 6  | 134.6 ppm | -                                                                      | HMBC 4,10,42 -> 6                            |
| 7  | 125.8 ppm | 7.16 ppm (s) (1H)                                                      | HMBC 7 -> 5                                  |
| 8  | 108.3 ppm | -                                                                      | HMBC 7,10 -> 8                               |
| 9  | 130.8 ppm | 7.19-7.16 ppm (m) (1H)                                                 | COSY 9 -> 10 ; HMBC 9 -> 7                   |
| 10 | 110.5 ppm | 6.56 ppm (d) J=8.0 Hz (1H)                                             | HMBC 10 -> 6,8                               |
| 11 | 148.6 ppm | -                                                                      | HMBC 7,12,13 -> 11                           |
| 12 | -         | not observed                                                           |                                              |
| 13 | 73.2 ppm  | 4.93 ppm (d) J=3.2 Hz (1H)                                             | HMBC 13 -> 2,4 / 13 -> 4,42 ; NOESY 13 -> 4' |
| 14 | -         | 7.19-7.16 ppm (m) (1H)                                                 | HMBC 14 -> 15                                |
| 15 | 171.0 ppm | -                                                                      | HMBC 16 -> 15                                |
| 16 | 47.5 ppm  | 4.29 ppm (pentet) J=7.4 Hz (1H)                                        | COSY/TOCSY 18 -> 16                          |
| 17 | 17.5 ppm  | 1.11 ppm (d) J=7.1 Hz (3H)                                             | COSY/TOCSY 16 -> 17                          |
| 18 | -         | 7.77 ppm (d) J=8.4 Hz (1H)                                             | HMBC 18 -> 19                                |
| 19 | 169.7 ppm | -                                                                      | HMBC 20 -> 19                                |
| 20 | 58.2 ppm  | 4.05 ppm (dd) J=6.9, 4.6 Hz (1H)                                       | COSY/TOCSY 25 -> 20                          |
| 21 | 35.6 ppm  | 1.88-1.84 (m) (1H)                                                     | TOCSY 20 -> 21                               |
| 22 | 23.8 ppm  | 1.32-1.27 ppm (m) (1H) ; 1.23-1.17 ppm (m) (1H)                        | TOCSY 21 -> 22                               |
| 23 | 11.7 ppm  | 0.81 ppm (dd) J=7.4, 7.4 Hz (3H)                                       | COSY/TOCSY 22 -> 23                          |
| 24 | 15.4 ppm  | 0.84 ppm (d) J=7.0 Hz (3H)                                             | COSY/TOCSY 21 -> 24                          |
| 25 | -         | 8.19 ppm (d) J=6.7 Hz (1H)                                             | HMBC 25 -> 26                                |
| 26 | 171.5 ppm | -                                                                      | HMBC 27 -> 26                                |
| 27 | 53.5 ppm  | 4.54 ppm (ddd) J=7.8, 7.8, 6.0 Hz (1H)                                 | COSY 27 -> 28                                |
| 28 | 61.7 ppm  | 3.43 ppm (dd) J=9.3, 5.6 Hz (1H) ; 3.14 ppm (dd) J=9.2, 9.2 Hz (1H)    | COSY/TOCSY 27 -> 28                          |
| 29 | -         | not observed                                                           | -                                            |
| 30 | -         | 7.91 ppm (d) J=7.4 Hz (1H)                                             | COSY 30 -> 27                                |
| 31 | 171.7 ppm | -                                                                      | HMBC 30 -> 31                                |
| 32 | 34.5 ppm  | 2.81-2.76 ppm (m) (1H) ; 2.37-2.33 ppm (m) (1H)                        | COSY 33 -> 32                                |
| 33 | 30.1 ppm  | 2.94-2.89 ppm (m) (1H) ; 2.85-2.81 ppm (m) (1H)                        | HMBC 35,39 -> 33                             |
| 34 | 140.9 ppm | -                                                                      | HMBC 36 -> 34                                |
| 35 | 128.2 ppm | 7.04 ppm (d) J=7.4 Hz (1H)                                             | HMBC 35 -> 33                                |
| 36 | 128.4 ppm | 7.21 ppm (dd) J= 7.6 Hz (1H)                                           | HMBC 36 -> 38                                |
| 37 | 124.0 ppm | 7.18-7.16 ppm (m) (1H)                                                 | TOCSY 35,39 -> 37 ; COSY 36 -> 37            |
| 38 | 136.6 ppm | -                                                                      | HMBC 41 -> 38                                |
| 39 | 125.1 ppm | 7.32 ppm (br s) (1H)                                                   | TOCSY 39 -> 35                               |
| 40 | 134.5 ppm | 6.42 ppm (d) J=15.8 Hz                                                 |                                              |
| 41 | 124.1 ppm | 6.36 ppm (ddd) J=15.4, 7.2, 7.2 Hz (1H)                                |                                              |
| 42 | 43.2 ppm  | 2.46-2.44 ppm (m) (2H)                                                 | COSY 41 -> 42                                |

Macrocyclic Product **19c**

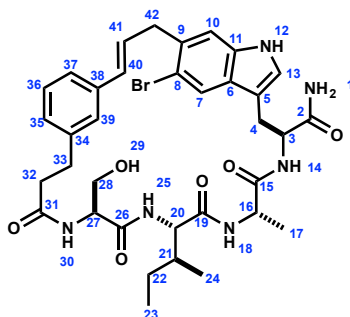

(600 MHz, DMSO-*d*<sub>6</sub>, 298K)

|    | <b>13C</b> | <b>1H</b>                                                              | <b>key correlation</b>         |
|----|------------|------------------------------------------------------------------------|--------------------------------|
| 1  | -          | 7.55 ppm (br s) (1H) ; 7.09 ppm (br s) (1H)                            | TOCSY 1 -> 1'                  |
| 2  | 173.6 ppm  | -                                                                      | HMBC 1 -> 2                    |
| 3  | 53.2 ppm   | 4.41 ppm (ddd) J=11.1, 7.9, 3.3 Hz (1H)                                | COSY 14 -> 3                   |
| 4  | 27.2 ppm   | 3.07 ppm (dd) J=14.6, 3.1 Hz (1H) ; 2.87 ppm (dd) J=14.6, 11.1 Hz (1H) | COSY/TOCSY 3 -> 4              |
| 5  | 109.5 ppm  | -                                                                      | HMBC 4,7,12,13 -> 5            |
| 6  | 127.6 ppm  | -                                                                      | HMBC 10,12,13 -> 6             |
| 7  | 121.7 ppm  | 7.96 ppm (s) (1H)                                                      | HMBC 7 -> 5,8,9,11             |
| 8  | 113.8 ppm  | -                                                                      | HMBC 7,10 -> 8                 |
| 9  | 130.5 ppm  | -                                                                      | HMBC 7,42 -> 9                 |
| 10 | 113.2      | 7.35 ppm (s) (1H)                                                      | HMBC 42 -> 10 / 10 -> 42       |
| 11 | 135.5 ppm  | -                                                                      | HMBC 7,12,13 -> 11             |
| 12 | -          | 10.82 ppm (d) J=1.9 Hz (1H)                                            | indole                         |
| 13 | 125.1 ppm  | 7.17 ppm (d) J=2.2 Hz (1H)                                             | COSY 12 -> 13                  |
| 14 | -          | 7.72 ppm (d) J= 8.0 Hz (1H)                                            | HMBC 14 -> 15                  |
| 15 | 171.6 ppm  | -                                                                      | HMBC 16 -> 15                  |
| 16 | 47.5 ppm   | 4.15 ppm (pentet) J=7.0 Hz (3H)                                        | COSY/TOCSY 18 -> 16            |
| 17 | 17.8 ppm   | 1.17 ppm (d) J=7.0 Hz (1H)                                             | COSY/TOCSY 16 -> 17            |
| 18 | -          | 7.60 ppm (d) J=7.0 Hz (1H)                                             | HMBC 18 -> 19                  |
| 19 | 169.4 ppm  | -                                                                      | HMBC 20 -> 19                  |
| 20 | 56.3 ppm   | 4.05 ppm (dd) J=8.4, 5.7 Hz (1H)                                       | COSY/TOCSY 25 -> 20            |
| 21 | 36.6 ppm   | 1.64-1.59 ppm (m) (1H)                                                 | TOCSY 20 -> 21                 |
| 22 | 23.5 ppm   | 1.22-1.17 ppm (m) (1H) ; 0.94-0.89 ppm (m) (1H)                        | COSY/TOCSY 21 -> 22            |
| 23 | 10.9 ppm   | 0.67 ppm (dd) J=7.4, 7.4 Hz (3H)                                       | COSY/TOCSY 22 -> 23            |
| 24 | 14.9 ppm   | 0.67 ppm (d) J=6.8 Hz (3H)                                             | COSY/TOCSY 21 -> 24            |
| 25 | -          | 7.41 ppm (d) J=8.5 Hz (1H)                                             | HMBC 25 -> 26                  |
| 26 | 169.5 ppm  | -                                                                      | HMBC 27 -> 26                  |
| 27 | 54.1 ppm   | 4.24 ppm (ddd) J=8.3, 6.1, 6.0 Hz (1H)                                 | COSY 27 -> 28                  |
| 28 | 61.2 ppm   | 3.44-3.37 ppm (m) (1H)                                                 | COSY/TOCSY 27 -> 28            |
| 29 | -          | 4.83 ppm (dd) J=5.3, 5.3 Hz (1H)                                       | COSY/TOCSY 29 -> 27,28         |
| 30 | -          | 8.03 ppm (d) J=8.3 Hz (1H)                                             | HMBC 30 -> 31                  |
| 31 | 171.2 ppm  | -                                                                      | HMBC 32,33 -> 31               |
| 32 | 35.7 ppm   | 2.52-2.48 ppm (m) (1H) ; 2.38-2.33 ppm (m) (1H)                        | COSY 33 -> 32                  |
| 33 | 30.0 ppm   | 2.76-2.72 ppm (m) (2H)                                                 | HMBC 39 -> 33                  |
| 34 | 141.2 ppm  | -                                                                      | HMBC 32,33,35,36 -> 34         |
| 35 | 128.1 ppm  | 7.19 ppm (d) J=4.8 Hz (1H)                                             | HMBC 36 -> 35                  |
| 36 | 126.7 ppm  | 7.04-7.01 ppm (m) (1H)                                                 | COSY 37 -> 36 ; TOCSY 39 -> 36 |
| 37 | 123.4 ppm  | 7.19 ppm (d) J=3.7 Hz (1H)                                             | HMBC 39,40 -> 37               |
| 38 | 136.9 ppm  | -                                                                      | HMBC 36,37,40,41 -> 38         |
| 39 | 125.0 ppm  | 7.09 ppm (s) (1H)                                                      | HMBC 40 -> 39                  |
| 40 | 129.9 ppm  | 6.26 ppm (d) J=15.9 Hz (1H)                                            |                                |
| 41 | 129.0 ppm  | 6.37 ppm (ddd) J=15.8, 6.2, 6.2 Hz (1H)                                |                                |
| 42 | 38.3 ppm   | 3.72 ppm (dd) J=16.1, 6.2 Hz (1H) ; 3.65 ppm (dd) J=16.0, 5.8 Hz (1H)  | COSY 41 -> 42                  |

Macrocyclic Product **19d**

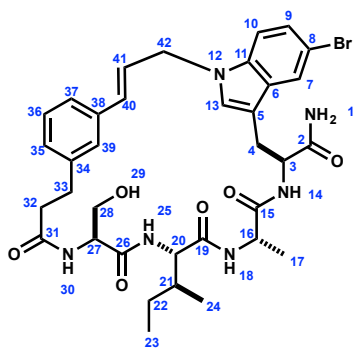

(600 MHz, DMSO-*d*<sub>6</sub>, 298K)

|    | <b>13C</b> | <b>1H</b>                                                             | <b>key correlation</b>       |
|----|------------|-----------------------------------------------------------------------|------------------------------|
| 1  | -          | 7.41 ppm (br s) (1H) ; 7.08 ppm (br s) (1H)                           | TOCSY 1 -> 1'                |
| 2  | 173.2 ppm  | -                                                                     | HMBC 1 -> 2                  |
| 3  | 52.7 ppm   | 4.38 ppm (ddd) J=10.3, 7.5, 2.9 Hz (1H)                               | COSY 14 -> 3                 |
| 4  | 26.8 ppm   | 3.09 ppm (dd) J=15.0, 2.9 Hz (1H) ; 3.00-2.95 ppm (m) (1H)            | COSY/TOCSY 3 -> 4            |
| 5  | 109.7 ppm  | -                                                                     | HMBC 4,7,13 -> 5             |
| 6  | 129.3 ppm  | -                                                                     | HMBC 10,13 -> 6              |
| 7  | 120.7 ppm  | 7.82 ppm (d) J=1.7 Hz (1H)                                            |                              |
| 8  | 111.1 ppm  | -                                                                     | HMBC 7,10 -> 8               |
| 9  | 123.2      | 7.24-7.21 ppm (m) (1H)                                                | HMBC 7 -> 10 ; COSY 7 -> 9   |
| 10 | 111.5 ppm  | 7.45 ppm (d) J=8.6 Hz (1H)                                            | COSY 10 -> 9 ; TOCSY 7 -> 10 |
| 11 | 134.4 ppm  | -                                                                     | HMBC 7,13, 42 -> 11          |
| 12 | -          | -                                                                     | -                            |
| 13 | 128.0 ppm  | 7.28 ppm (s) (1H)                                                     | HMBC 42 -> 13                |
| 14 | -          | 7.76 ppm (d) J=7.7 Hz (1H)                                            | HMBC 14 -> 15                |
| 15 | 172.0 ppm  | -                                                                     | HMBC 16 -> 15                |
| 16 | 17.3 ppm   | 1.21 ppm (d) J=7.2 Hz (3H)                                            | COSY/TOCSY 17 -> 16          |
| 17 | 47.6 ppm   | 4.29 ppm (pentet) J=7.3 Hz (1H)                                       | COSY/TOCSY 18 -> 17          |
| 18 | -          | 8.00 ppm (d) J=7.4 Hz (1H)                                            | HMBC 18 -> 19                |
| 19 | 170.3 ppm  | -                                                                     | HMBC 20 -> 19                |
| 20 | 56.7 ppm   | 4.13 ppm (dd) J=7.5, 6.4 Hz (1H)                                      | COSY/TOCSY 25 -> 20          |
| 21 | 36.5 ppm   | 1.71-1.67 ppm (m) (1H)                                                | COSY 20 -> 21                |
| 22 | 23.9 ppm   | 1.38-1.34 ppm (m) (1H) ; 1.09-1.04 ppm (m) (1H)                       | COSY/TOCSY 21 -> 22          |
| 23 | 10.9 ppm   | 0.75 ppm (dd) J=7.4 Hz (3H)                                           | COSY/TOCSY 22 -> 23          |
| 24 | 14.9 ppm   | 0.79 ppm (d) J=6.8 Hz (3H)                                            | COSY/TOCSY 21 -> 24          |
| 25 | -          | 7.46 ppm (d) J=7.8 Hz (1H)                                            | HMBC 25 -> 26                |
| 26 | 170.2 ppm  | -                                                                     | HMBC 27 -> 26                |
| 27 | 55.4 ppm   | 4.23 ppm (ddd) J=7.5, 5.9, 5.9 Hz (1H)                                | COSY 27 -> 28                |
| 28 | 61.0 ppm   | 3.57-3.50 ppm (m) (2H)                                                | COSY/TOCSY 27 -> 28          |
| 29 | -          | not observed                                                          | -                            |
| 30 | -          | 8.13 ppm (d) J=7.6 Hz (1H)                                            | HMBC 30 -> 31                |
| 31 | 172.3 ppm  | -                                                                     | HMBC 32,33 -> 31             |
| 32 | 35.5 ppm   | 2.53-2.50 ppm (m) (1H) ; 2.47-2.44 ppm (m) (1H)                       | COSY 33 -> 32                |
| 33 | 30.1 ppm   | 2.87-2.84 ppm (m) (1H) ; 2.82-2.77 ppm (m) (1H)                       | HMBC 33 -> 35,39             |
| 34 | 141.5 ppm  | -                                                                     | HMBC 32,33,36 -> 34          |
| 35 | 127.5 ppm  | 7.09 ppm (d) J=7.1 Hz (1H)                                            | HMBC 37 -> 35                |
| 36 | 128.2 ppm  | 7.24-7.21 ppm (m) (1H)                                                | COSY 37 -> 36, 37            |
| 37 | 124.4 ppm  | 7.18 ppm (d) J=7.5 Hz (1H)                                            | HMBC 40 -> 37                |
| 38 | 135.9 ppm  | -                                                                     | HMBC 36,41 -> 38             |
| 39 | 124.8 ppm  | 7.33 ppm (s) (1H)                                                     | HMBC 40 -> 39                |
| 40 | 132.3 ppm  | 6.66 ppm (d) J=15.8 Hz (1H)                                           |                              |
| 41 | 124.5 ppm  | 6.44 ppm (ddd) J=15.8, 6.3, 6.3 Hz (1H)                               |                              |
| 42 | 47.1 ppm   | 4.93 ppm (dd) J=15.9, 6.0 Hz (1H) ; 4.83 ppm (dd) J=15.9, 6.2 Hz (1H) | COSY 41 -> 42                |

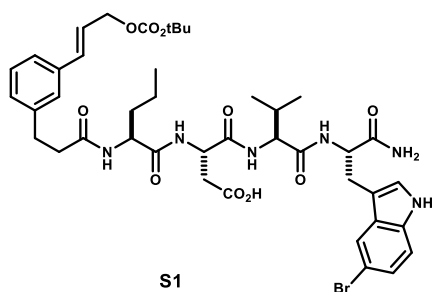

**Acyclic Cinnamyl Carbonate S1:** Synthesized according to General Procedure A. The reaction was filtered, concentrated, and the residue partitioned between EtOAc and H<sub>2</sub>O. The resulting solids were collected by filtration to give **S1** (546mg, 62%) as an off-white solid. <sup>1</sup>H NMR (DMSO-*d*<sub>6</sub>, 600 MHz): δ 0.69 (d, *J* = 6.4 Hz, 3H), 0.72 (d, *J* = 6.4 Hz, 3H), 0.77 (t, *J* = 7.3 Hz, 3H), 1.35-1.47 (m, 2H), 1.43 (s, 9H), 1.47-1.58 (m, 1H), 1.89-1.99 (m, 1H), 2.37-2.46 (m, 1H), 2.46-2.55 (m, 1H), 2.68 (dd, *J* = 16.4, 5.7 Hz, 1H), 2.75-2.85 (m, 2H), 2.88-2.97 (m, 2H), 3.08 (dd, *J* = 14.3, 4.6 Hz, 1H), 3.43 (br s, 1H), 4.04-4.10 (m, 1H), 4.22-4.29 (m, 1H), 4.39-4.49 (m, 1H), 4.53-4.59 (m, 1H), 4.67 (d, *J* = 6.0 Hz, 2H), 6.33 (dt, *J* = 15.6, 6.0 Hz, 1H), 6.63 (d, *J* = 15.6 Hz, 1H), 7.04 (s, 1H), 7.11 (d, *J* = 6.8 Hz, 1H), 7.15 (d, *J* = 8.1 Hz, 1H), 7.19 (s, 1H), 7.21-7.35 (m, 5H), 7.53 (br d, *J* = 8.3 Hz, 1H), 7.77 (br s, 1H), 7.92-7.98 (m, 1H), 8.01 (d, *J* = 7.7 Hz, 1H), 8.35 (d, *J* = 7.2 Hz, 1H), 11.02 (s, 1H), 11.92 (br s, 1H). <sup>13</sup>C NMR (CDCl<sub>3</sub>, 150 MHz): δ 173.2, 172.3, 172.1, 171.5, 170.7, 170.4, 162.3, 152.8, 141.7, 135.9, 134.7, 133.5, 129.2, 128.6, 128.1, 126.4, 125.4, 124.2, 123.3, 120.7, 113.3, 111.0, 110.1, 81.5, 66.9, 58.0, 53.3, 52.2, 49.7, 36.6, 35.8, 34.3, 30.9, 30.3, 27.4, 19.0, 18.4, 18.0, 17.5, 13.6. MS *m/z* 883.2/885.2 (calc'd: C<sub>42</sub>H<sub>56</sub>BrN<sub>6</sub>O<sub>10</sub> [M+H]<sup>+</sup>, 883.3).

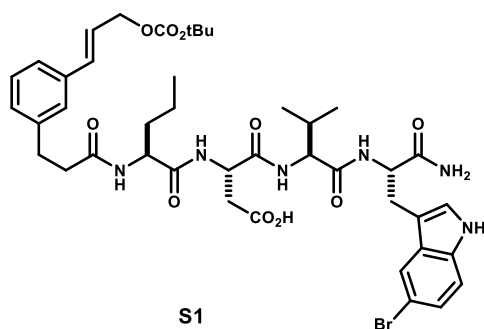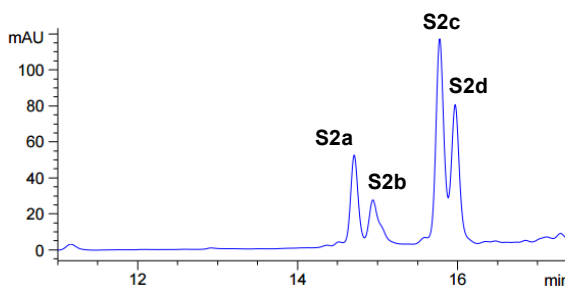

MS *m/z* 723.2 (calc'd: C<sub>45</sub>H<sub>42</sub>FN<sub>6</sub>O<sub>5</sub>, [M+H]<sup>+</sup>, 723.2).

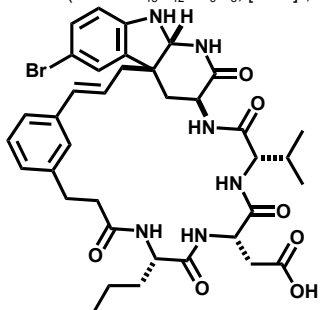

MS *m/z* 723.2 (calc'd: C<sub>45</sub>H<sub>42</sub>FN<sub>6</sub>O<sub>5</sub>, [M+H]<sup>+</sup>, 723.2).

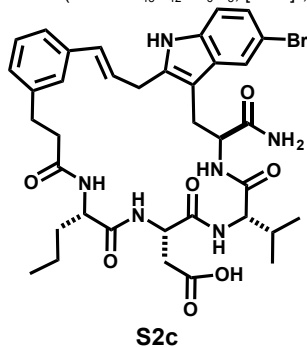

MS *m/z* 723.2 (calc'd: C<sub>45</sub>H<sub>42</sub>FN<sub>6</sub>O<sub>5</sub>, [M+H]<sup>+</sup>, 723.2).

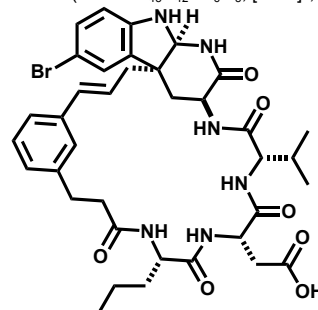

MS *m/z* 723.2 (calc'd: C<sub>45</sub>H<sub>42</sub>FN<sub>6</sub>O<sub>5</sub>, [M+H]<sup>+</sup>, 723.2).

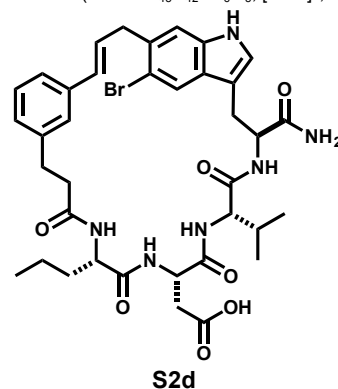

*Analytical HPLC Method*

Column: Waters X-Select™  
PFP, 4.6x250 mm, 5 μm  
Solvent A: H<sub>2</sub>O + 0.1% TFA  
Solvent B: ACN + 0.1% TFA  
Flow rate: 1.00 mL/min

| Time | %B |
|------|----|
| 0    | 10 |
| 3    | 10 |
| 23   | 70 |
| 25   | 10 |
| 30   | 10 |

*Prep HPLC Method A*

Column: Waters X-Select™  
PFP, 4.6x250 mm, 5 μm  
Solvent A: H<sub>2</sub>O + 0.1% TFA  
Solvent B: ACN + 0.1% TFA  
Flow rate: 18.00 mL/min

| Time | %B |
|------|----|
| 0    | 40 |
| 3    | 40 |
| 23   | 85 |

*Prep HPLC Method B*

Column: Waters X-Select™  
PFP, 4.6x250 mm, 5 μm  
Solvent A: H<sub>2</sub>O + 0.1%  
HCO<sub>2</sub>H  
Solvent B: ACN + 0.1%  
HCO<sub>2</sub>H  
Flow rate: 18.00 mL/min

| Time | %B |
|------|----|
| 0    | 40 |
| 3    | 40 |
| 23   | 85 |

Macrocyclic Product **S2a** (600 MHz, DMSO-*d*<sub>6</sub>, 298K)

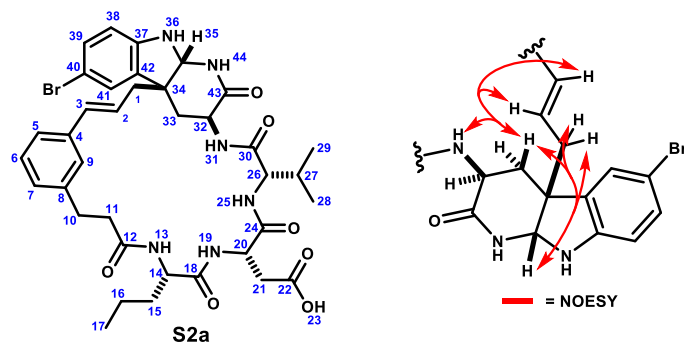

|     | <b>13C</b> | <b>1H</b>                                                                      | <b>key correlations</b>               |
|-----|------------|--------------------------------------------------------------------------------|---------------------------------------|
| 1   | 41.6       | 2.38 (dd, <i>J</i> = 13.4, 6.6 Hz, 1H), 2.46 (dd, <i>J</i> = 13.4, 5.7 Hz, 1H) | HMBC 1→35 NOESY 1→35                  |
| 2   | 124.2      | 6.24-6.28 (m, 1H)                                                              | HMBC 2→4 NOESY 2→33                   |
| 3   | 134.2      | 6.24-6.28 (m, 1H)                                                              | HMBC 3→1 NOESY 3→33                   |
| 4   | 136.7      | -                                                                              |                                       |
| 5   | 124.1      | 7.04 (br d, <i>J</i> = 7.6 Hz, 1H)                                             | HMBC 5→3                              |
| 6   | 127.7      | 7.15 (dd, <i>J</i> = 7.6, 7.6 Hz, 1H)                                          | HMBC 6→4,8                            |
| 7   | 128        | 7.00 (br d, <i>J</i> = 7.6 Hz, 1H)                                             |                                       |
| 8   | 140.1      | -                                                                              |                                       |
| 9   | 125.5      | 7.50-7.53 (m, 1H)                                                              | HMBC 9→3                              |
| 10  | 30.4       | 2.83-2.88 (m, 2H)                                                              | HMBC 10→8,12                          |
| 11  | 34.2       | 2.33-2.38 (m, 1H), 2.90-2.94 (m, 1H)                                           | HMBC 11→8,12                          |
| 12  | 170.4      | -                                                                              |                                       |
| 13  | -          | 7.70 (br d, <i>J</i> = 8.6 Hz, 1H)                                             | HMBC 13→12                            |
| 14  | 50.6       | 4.26-4.31 (m, 1H)                                                              |                                       |
| 15  | 35.6       | 1.10-1.17 (m, 1H), 1.50-1.56 (m, 1H)                                           |                                       |
| 16  | 17.5       | 0.51-0.57 (m, 1H), 0.63-0.69 (m, 1H)                                           |                                       |
| 17  | 13.5       | 0.61-0.65 (m, 3H)                                                              |                                       |
| 18  | 172.1      | -                                                                              |                                       |
| 19  | -          | 8.42 (br d, <i>J</i> = 5.7 Hz, 1H)                                             | HMBC 19→18                            |
| 20  | 52         | 4.25 (ddd, <i>J</i> = 8.2, 5.7, 5.7 Hz, 1H)                                    | COSY 20→21                            |
| 21  | 35.9       | 2.54-2.59 (m, 2H)                                                              | HMBC 21→22                            |
| 22  | 171.4      | -                                                                              |                                       |
| 23  | -          | not detected                                                                   |                                       |
| 24  | 170.6      | -                                                                              |                                       |
| 25  | -          | 6.97 (br d, <i>J</i> = 8.0 Hz, 1H)                                             |                                       |
| 26  | 56.9       | 4.08 (dd, <i>J</i> = 8.0, 6.4 Hz, 1H)                                          | TOCSY 26→25,27,28,29 HMBC 26→30       |
| 27  | 30.7       | 1.89-1.96 (m, 1H)                                                              |                                       |
| 28  | 18.6       | 0.78 (d, <i>J</i> = 6.7 Hz, 3H)                                                |                                       |
| 29  | 17.9       | 0.79 (d, <i>J</i> = 6.7 Hz, 3H)                                                |                                       |
| 30  | 169.5      | -                                                                              |                                       |
| 31  | -          | 7.92 (br d, <i>J</i> = 7.3 Hz, 1H)                                             | HMBC 31→30 TOCSY 31→32,33 NOESY 31→33 |
| 32  | 46.1       | 4.00 (ddd, <i>J</i> = 12.5, 7.3, 5.0 Hz, 1H)                                   | HMBC 32→30,43                         |
| 33  | 33.3       | <i>pro-S</i> 1.87 (dd, <i>J</i> = 13.1, 12.5 Hz, 1H)                           |                                       |
| 33' |            | <i>pro-R</i> 2.33 (dd, <i>J</i> = 13.1, 4.7 Hz, 1H)                            |                                       |
| 34  | 47.4       | -                                                                              |                                       |
| 35  | 74.9       | 4.82 (d, <i>J</i> = 2.3 Hz, 1H)                                                | HMBC 35→1,34,37,43 COSY 35→36,44      |
| 36  | -          | 6.31 (br s, 1H)                                                                | HMBC 36→34,37,42                      |
| 37  | 148.3      | -                                                                              |                                       |
| 38  | 110.8      | 6.62 (d, <i>J</i> = 8.3 Hz, 1H)                                                | HMBC 38→40,42                         |
| 39  | 130.6      | 7.18 (dd, <i>J</i> = 8.3, 2.0 Hz, 1H)                                          | HMBC 39→37,40,41                      |
| 40  | 108        | -                                                                              |                                       |
| 41  | 126.3      | 7.05 (d, <i>J</i> = 2.0 Hz, 1H)                                                | HMBC 41→34,37,40                      |
| 42  | 132.4      | -                                                                              |                                       |
| 43  | 169.3      | -                                                                              |                                       |
| 44  | -          | 7.96 (d, <i>J</i> = 2.3 Hz, 1H)                                                | HMBC 44→32,34                         |



Macrocyclic Product **S2b** (600 MHz, DMSO-*d*<sub>6</sub>, 298K)

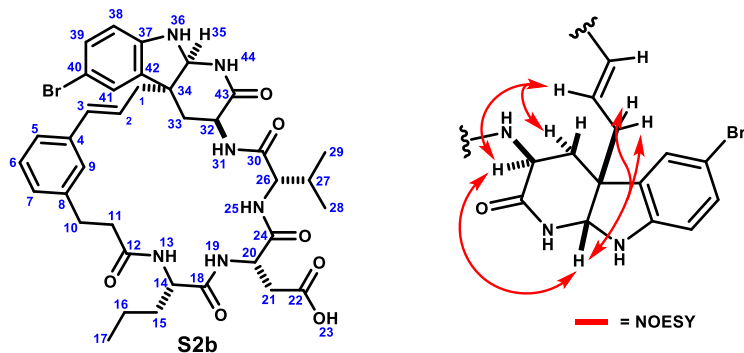

|     | 13C   | 1H                                                        | key correlations                      |
|-----|-------|-----------------------------------------------------------|---------------------------------------|
| 1   | 40.7  | 2.42 (dd, <i>J</i> = 13.7, 7.0 Hz, 1H), 2.47-2.52 (m, 1H) | HMBC 1→34 NOESY 1→35,32               |
| 2   | 124.7 | 6.65 (ddd, <i>J</i> = 15.6, 7.6, 7.0 Hz, 1H)              | HMBC 2→4 NOESY 2→33'                  |
| 3   | 133.2 | 6.40 (d, <i>J</i> = 15.6 Hz, 1H)                          | HMBC 3→1                              |
| 4   | 136.6 | -                                                         |                                       |
| 5   | 125.1 | 6.98 (br d, <i>J</i> = 7.6 Hz, 1H)                        | HMBC 5→3                              |
| 6   | 127.9 | 7.17 (dd, <i>J</i> = 7.6, 7.5 Hz, 1H)                     | HMBC 6→4,8                            |
| 7   | 127.5 | 7.05 (br d, <i>J</i> = 7.5 Hz, 1H)                        |                                       |
| 8   | 141.3 | -                                                         |                                       |
| 9   | 123.9 | 7.81 (br s, 1H)                                           | HMBC 9→3                              |
| 10  | 29.9  | 2.84-2.91 (m, 1H)                                         | HMBC 10→8,12                          |
| 11  | 34.9  | 2.53-2.60 (m, 1H), 2.64-2.70 (m, 1H)                      | HMBC 11→8,12                          |
| 12  | 171.5 | -                                                         |                                       |
| 13  | -     | 8.08 (br d, <i>J</i> = 7.7, 5.5 Hz, 1H)                   | TOCSY 13→14,15,16,17                  |
| 14  | 52.2  | 4.16 (ddd, <i>J</i> = 8.9, 7.7, 5.5 Hz, 1H)               |                                       |
| 15  | 33.9  | 1.44-1.52 (m, 1H), 1.62-1.68 (m, 1H)                      |                                       |
| 16  | 18.3  | 1.04-1.13 (m, 2H)                                         |                                       |
| 17  | 13.4  | 0.77 (t, <i>J</i> = 7.3 Hz, 3H)                           |                                       |
| 18  | 171.9 | -                                                         |                                       |
| 19  | -     | 8.31 (br d, <i>J</i> = 6.9 Hz, 1H)                        | TOCSY 19→20,21                        |
| 20  | 51.3  | 4.27-4.32 (m, 1H)                                         | HMBC 20→22                            |
| 21  | 35.3  | 2.68-2.79 (m, 1H)                                         | HMBC 21→22                            |
| 22  | 171.6 | -                                                         |                                       |
| 23  | -     | not detected                                              |                                       |
| 24  | 169.7 | -                                                         |                                       |
| 25  | -     | 7.12 (d, <i>J</i> = 7.1 Hz, 1H)                           | TOCSY 25→26,27,28,29 HMBC 25→24       |
| 26  | 56.6  | 4.27-4.32 (m, 1H)                                         |                                       |
| 27  | 31.5  | 1.97-2.05 (m, 1H)                                         | HMBC 27→26,30                         |
| 28  | 17.6  | 0.85 (d, <i>J</i> = 6.8 Hz, 3H)                           |                                       |
| 29  | 18.8  | 0.87 (d, <i>J</i> = 6.8 Hz, 3H)                           |                                       |
| 30  | 169.7 | -                                                         |                                       |
| 31  | -     | 8.23 (br d, <i>J</i> = 7.3 Hz, 1H)                        | TOCSY 31→32,33 HMBC 31→30 NOESY 31→33 |
| 32  | 47.1  | 4.41 (ddd, <i>J</i> = 13.2, 7.3, 4.5 Hz, 1H)              | HMBC 32→43 NOESY 32→35                |
| 33  | 35    | <i>pro</i> -S 1.69 (dd, <i>J</i> = 13.2, 13.2 Hz, 1H)     | HMBC 33→43                            |
| 33' |       | <i>pro</i> -R 2.65 (dd, <i>J</i> = 13.2, 4.5 Hz, 1H)      |                                       |
| 34  | 48.5  | -                                                         |                                       |
| 35  | 72.4  | 4.83 (br s, 1H)                                           | HMBC 35→1 NOESY 35→1,2,3              |
| 36  | -     | 6.21 (br s, 1H)                                           | HMBC 36→34,42                         |
| 37  | 147   | -                                                         |                                       |
| 38  | 110.7 | 6.56 (d, <i>J</i> = 8.1 Hz, 1H)                           | HMBC 38→40,42                         |
| 39  | 130.3 | 7.12 (dd, <i>J</i> = 8.1, 1.5 Hz, 1H)                     |                                       |
| 40  | 108.5 | -                                                         |                                       |
| 41  | 126.4 | 7.25 (d, <i>J</i> = 1.5 Hz, 1H)                           |                                       |
| 42  | 138.1 | -                                                         |                                       |
| 43  | 169.8 | -                                                         |                                       |
| 44  | -     | 7.60 (s, 1H)                                              | HMBC 44→32,34                         |

Macrocyclic Product **S2c** (600 MHz, DMSO-*d*<sub>6</sub>, 298K)

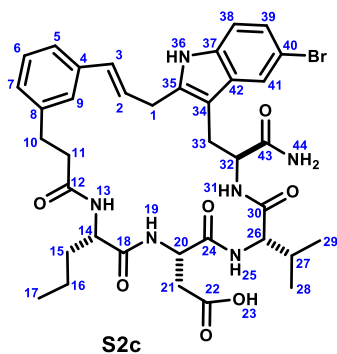

|    | <b>13C</b> | <b>1H</b>                                                        | <b>key correlations</b>         |
|----|------------|------------------------------------------------------------------|---------------------------------|
| 1  | 29.6       | 3.69 (dd, J = 16.5, 6.7 Hz, 1H), 3.78 (dd, J = 16.5, 7.0 Hz, 1H) | HMBC 1→2,3,34,35                |
| 2  | 125.5      | 6.47 (ddd, J = 15.6, 7.0, 6.7 Hz, 1H)                            | COSY 2→1 HMBC 2→4               |
| 3  | 131.8      | 6.68 (br d, J = 15.6 Hz, 1H)                                     | HMBC 3→4                        |
| 4  | 137        | -                                                                |                                 |
| 5  | 123.5      | 7.25 (br d, J = 7.7 Hz, 1H)                                      | HMBC 5→3 TOCSY 5→6,7,9          |
| 6  | 127.9      | 7.21 (dd, J = 7.7, 7.5 Hz, 1H)                                   | HMBC 6→4,8                      |
| 7  | 127.2      | 7.04 (br d, J = 7.5 Hz, 1H)                                      |                                 |
| 8  | 141.3      | -                                                                |                                 |
| 9  | 125.8      | 7.40 (br s, 1H)                                                  | HMBC 9→3                        |
| 10 | 29.9       | 2.79 (ddd, J = 14.6, 8.6, 4.4 Hz, 1H), 2.93-2.99 (m, 1H)         | HMBC 10→7,9,12                  |
| 11 | 35.2       | 2.45 (ddd, J = 14.6, 8.3, 4.4 Hz, 1H), 2.51-2.56 (m, 1H)         | HMBC 11→12                      |
| 12 | 171.9      | -                                                                |                                 |
| 13 | -          | 8.08 (br d, J = 7.7 Hz, 1H)                                      | HMBC 13→12 TOCSY 13→14,15,16,17 |
| 14 | 52.4       | 4.19 (ddd, J = 8.9, 7.7, 5.3 Hz, 1H)                             | COSY 14→15 HMBC 14→18           |
| 15 | 33.6       | 1.44-1.51 (m, 1H), 1.55-1.63 (m, 1H)                             | COSY 15→16 HMBC 15→18           |
| 16 | 18.5       | 1.14-1.30 (m, 2H)                                                |                                 |
| 17 | 13.3       | 0.79 (dd, J = 7.3, 7.3 Hz, 3H)                                   |                                 |
| 18 | 172.4      | -                                                                |                                 |
| 19 | -          | 8.10 (br d, J = 6.5 Hz, 1H)                                      | HMBC 19→18                      |
| 20 | 49.6       | 4.54 (ddd, J = 7.3, 6.5, 6.3 Hz, 1H)                             | HMBC 20→22,24                   |
| 21 | 35.3       | 2.54 (dd, J = 16.8, 7.3 Hz, 1H), 2.71 (dd, J = 16.8, 6.3 Hz, 1H) | HMBC 21→22                      |
| 22 | 171.9      | -                                                                |                                 |
| 23 | -          | 12.33 (br s, 1H)                                                 |                                 |
| 24 | 170.4      | -                                                                |                                 |
| 25 | -          | 7.63 (br d, J = 8.3 Hz, 1H)                                      | HMBC 25→24                      |
| 26 | 57.5       | 4.14 (dd, J = 8.3, 5.7 Hz, 1H)                                   | HMBC 26→30                      |
| 27 | 29.4       | 2.00-2.17 (m, 1H)                                                |                                 |
| 28 | 16.7       | 0.61 (d, J = 6.8 Hz, 3H)                                         |                                 |
| 29 | 18.8       | 0.75 (d, J = 6.8 Hz, 3H)                                         | TOCSY 29→25,26,27,28            |
| 30 | 170        | -                                                                |                                 |
| 31 | -          | 7.67-7.70 (m, 1H)                                                | HMBC 31→30                      |
| 32 | 53.1       | 4.40 (ddd, J = 8.1, 8.0, 6.0 Hz, 1H)                             |                                 |
| 33 | 26.6       | 2.98 (dd, J = 14.4, 8.0 Hz, 1H), 3.07 (dd, J = 14.4, 6.0 Hz, 1H) | HMBC 33→34                      |
| 34 | 105.5      | -                                                                |                                 |
| 35 | 136.8      | -                                                                |                                 |
| 36 | -          | 10.88 (s, 1H)                                                    | HMBC 36→34                      |
| 37 | 133.8      | -                                                                |                                 |
| 38 | 112.2      | 7.20 (d, J = 8.4 Hz, 1H)                                         | HMBC 38→40,42                   |
| 39 | 122.2      | 7.08 (dd, J = 8.4, 1.8 Hz, 1H)                                   | HMBC 39→37,40                   |
| 40 | 110.8      | -                                                                |                                 |
| 41 | 120.2      | 7.69 (d, J = 1.8 Hz, 1H)                                         | HMBC 41→34,37,40                |
| 42 | 129.8      | -                                                                |                                 |
| 43 | 172.7      | -                                                                |                                 |
| 44 | -          | 7.10 (br s, 1H), 7.19 (br s, 1H)                                 | HMBC 44,44'→43                  |

Macrocyclic Product **S2d** (500 MHz, DMSO-*d*<sub>6</sub>, 298K)

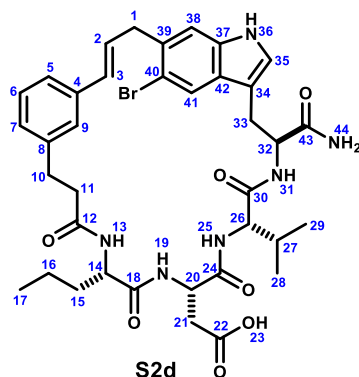

**S2d**

|    | <b>13C</b> | <b>1H</b>                                                         | <b>key correlations</b>   |
|----|------------|-------------------------------------------------------------------|---------------------------|
| 1  | 39         | 3.62 (dd, J = 15.5, 5.4 Hz, 1H), 3.72 (dd, J = 15.5, 6.5 Hz, 1H)  | HMBC 1→2,3,38,39          |
| 2  | 129.2      | 6.39 (ddd, J = 15.8, 6.5, 5.4 Hz, 1H)                             | COSY 1→2 HMBC 2→4         |
| 3  | 130.3      | 6.24 (br d, J = 15.8 Hz, 1H)                                      |                           |
| 4  | 137.3      | -                                                                 |                           |
| 5  | 128.3      | 7.15-7.19 (m, 1H)                                                 | HMBC 5→3                  |
| 6  | 123.9      | 7.15-7.19 (m, 1H)                                                 | HMBC 6→4,8                |
| 7  | 127.5      | 6.96-7.01 (m, 1H)                                                 |                           |
| 8  | 141.3      | -                                                                 |                           |
| 9  | 125.1      | 7.13 (br s, 1H)                                                   | HMBC 9→3                  |
| 10 | 30.4       | 2.68-2.75 (m, 1H), 2.77-2.85 (m, 1H)                              | HMBC 10→8,12              |
| 11 | 35.5       | 2.34 (ddd, J = 13.9, 5.9, 5.9 Hz, 1H), 2.53-2.61 (m, 1H)          | HMBC 11→8,12              |
| 12 | 171.6      | -                                                                 |                           |
| 13 | -          | 7.90 (br d, J = 7.7 Hz, 1H)                                       | TOCSY 13→14,15,16,17      |
| 14 | 52.1       | 4.08 (ddd, J = 7.8, 7.7, 5.0 Hz, 1H)                              | HMBC 14→18                |
| 15 | 34         | 1.16-1.26 (m, 1H), 1.27-1.36 (m, 1H)                              | HMBC 15→18                |
| 16 | 17.9       | 0.77-0.90 (m, 2H)                                                 |                           |
| 17 | 13.3       | 0.46 (t, J = 7.3 Hz, 3H)                                          |                           |
| 18 | 172        | -                                                                 |                           |
| 19 | -          | 8.23 (br d, J = 7.4 Hz, 1H)                                       | HMBC 19→18 TOCSY 19→20,21 |
| 20 | 50.5       | 4.42 (ddd, J = 8.4, 7.4, 5.0 Hz, 1H)                              | HMBC 20→24                |
| 21 | 35.9       | 2.55 (dd, J = 16.7, 8.4 Hz, 1H), 2.67 (dd, J = 16.7, 5.0 Hz, 1H)  | HMBC 21→22                |
| 22 | 171.9      | -                                                                 |                           |
| 23 | -          | 12.15 (br s, 1H)                                                  |                           |
| 24 | 170.5      | -                                                                 |                           |
| 25 | -          | 6.99-7.04 (m, 1H)                                                 |                           |
| 26 | 57.6       | 4.04 (dd, J = 7.6, 5.4 Hz, 1H)                                    | HMBC 26→30                |
| 27 | 30.8       | 1.89-1.90 (m, 1H)                                                 |                           |
| 28 | 17.4       | 0.68 (d, J = 6.8 Hz, 3H)                                          | HMBC 28→25,26,27,29       |
| 29 | 18.9       | 0.72 (d, J = 6.8 Hz, 3H)                                          |                           |
| 30 | 170        | -                                                                 |                           |
| 31 | -          | 7.84 (br d, J = 8.7 Hz, 1H)                                       | HMBC 31→30 TOCSY 31→32,33 |
| 32 | 53.3       | 4.46 (ddd, J = 11.8, 8.7, 2.5 Hz, 1H)                             |                           |
| 33 | 27.6       | 2.83 (dd, J = 14.3, 11.8 Hz, 1H), 3.12 (dd, J = 14.3, 2.5 Hz, 1H) | HMBC 33→34                |
| 34 | 109.9      | -                                                                 |                           |
| 35 | 125.4      | 7.16-7.18 (m, 1H)                                                 | HMBC 35→37                |
| 36 | -          | 10.76 (d, J = 1.4 Hz, 1H)                                         |                           |
| 37 | 135.7      | -                                                                 |                           |
| 38 | 130.5      | 7.36 (s, 1H)                                                      | HMBC 38→1,40,42           |
| 39 | 113.5      | -                                                                 |                           |
| 40 | 114.1      | -                                                                 |                           |
| 41 | 121.9      | 7.96 (s, 1H)                                                      | HMBC 41→1,34,39,40        |
| 42 | 127.8      | -                                                                 |                           |
| 43 | 173.6      | -                                                                 |                           |
| 44 | -          | 7.11 (br s, 1H), 7.51 (br s, 1H)                                  | HMBC 44,44'→43            |

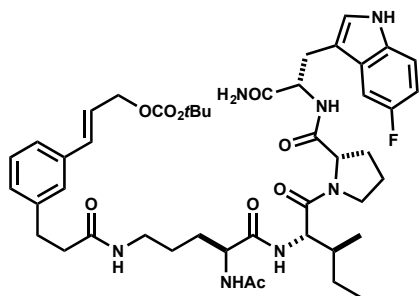

**Acyclic Cinnamyl Carbonate S3:** Synthesized according to Procedure A. Purified via SiO<sub>2</sub> chromatography using a gradient from 1% to 10% methanol in chloroform. Beige solid. <sup>1</sup>H NMR (DMSO-*d*<sub>6</sub>, 500 MHz): δ 10.93 (d, *J* = 2.5 Hz, 1H), 7.97 (d, *J* = 8.3 Hz, 1H), 7.89 (d, *J* = 8.4 Hz, 1H), 7.83 (t, *J* = 5.6 Hz, 1H), 7.28-7.37 (m, 5H), 7.22-7.27 (m, 3H), 7.11 (br. d, *J* = 7.3 Hz, 1H), 7.04 (br. s, 1H), 6.89 (ddd, *J* = 9.1, 9.1, 2.5 Hz, 1H), 6.64 (d, *J* = 16 Hz, 1H), 6.34 (dt, *J* = 16.0, 6.2 Hz, 1H), 4.68 (dd, *J* = 6.2, 1.1 Hz, 2H), 4.38 (ddd, *J* = 7.0, 7.0, 7.0 Hz, 1H), 4.26- 4.35 (m, 3H), 3.74 (ddd, *J* = 9.6, 6.6, 6.6 Hz, 1H), 3.53 (ddd, *J* = 9.6, 5.7, 6.0 Hz, 1H), 2.96-3.10 (m, 4H), 2.8 (app t, *J* = 7.8 Hz, 2H), 2.37 (app t, *J* = 7.8 Hz, 2H), 1.93-2.03 (m, 1H), 1.70-1.91 (m, 6H), 1.47-1.60 (m, 2H), 1.44 (s, 9H), 1.27-2.39 (m, 2H), 1.00-1.08 (m, 1H), 0.84 (d, *J* = 6.8 Hz, 3H), 0.81 (t, *J* = 7.4 Hz, 1H). <sup>13</sup>C NMR (DMSO-*d*<sub>6</sub>, 126 MHz): δ 173.0, 171.7, 171.2, 171.1, 170.2, 169.2, 155.7, 152.8, 141.8, 135.8, 133.4, 132.7, 128.6, 128.0, 127.7, 127.7, 126.4, 125.8, 124.2, 123.3, 112.1, 112.0, 110.32, 110.28, 108.9, 108.7, 103.3, 103.1, 81.5, 67.0, 66.9, 59.5, 54.5, 53.3, 51.9, 47.2, 38.1, 36.9, 36.1, 31.0, 29.6, 28.9, 27.3, 25.8, 24.4, 24.1, 22.5, 14.9, 10.8. MS *m/z* 876.5 (calc'd: C<sub>46</sub>H<sub>62</sub>N<sub>7</sub>O<sub>9</sub>, [M+H]<sup>+</sup>, 876.5)

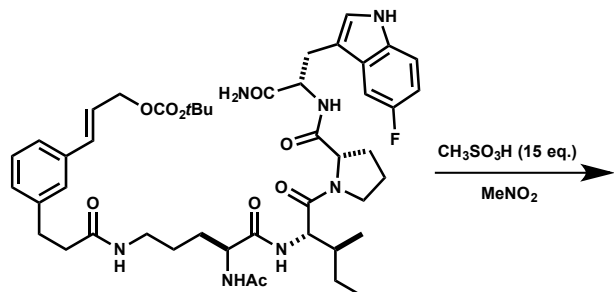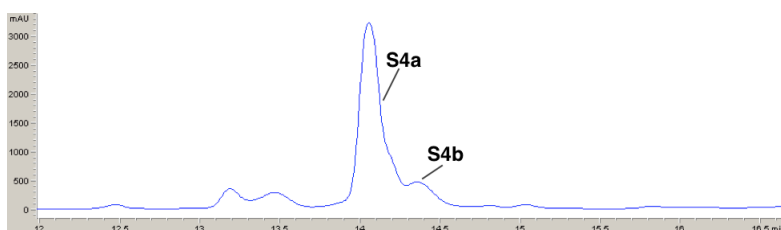

MS *m/z* 758.1 (calc'd: C<sub>45</sub>H<sub>42</sub>FN<sub>6</sub>O<sub>5</sub>, [M+H]<sup>+</sup>, 758.4).

MS *m/z* 758.1 (calc'd: C<sub>45</sub>H<sub>42</sub>FN<sub>6</sub>O<sub>5</sub>, [M+H]<sup>+</sup>, 758.4).

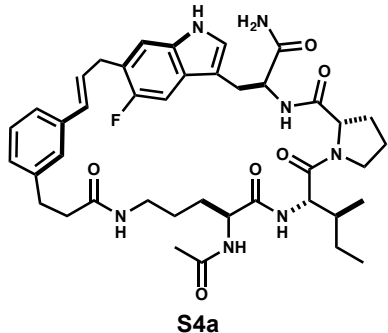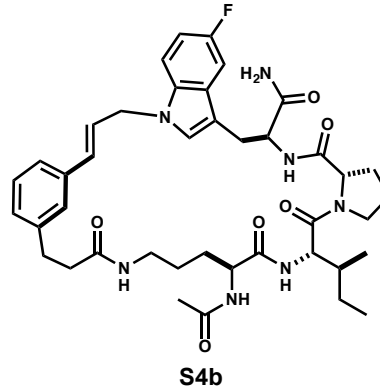

**Analytical HPLC Method**

Column: Waters XBridge™ C<sub>18</sub>,  
4.6x250 mm, 5 μm  
Solvent A: H<sub>2</sub>O + 0.1% TFA  
Solvent B: ACN + 0.1% TFA  
Flow rate: 1.00 mL/min

| Time | %B |
|------|----|
| 0    | 30 |
| 2    | 30 |
| 30   | 60 |

**Preparative HPLC method A:**

Column: Waters XBridge™ C<sub>18</sub>,  
19x250mm, 5μm.  
Solvent A: H<sub>2</sub>O + 0.1%v TFA  
Solvent B: ACN + 0.1%v TFA  
Flow rate: 18.00 ml/min

| Time | %B  |
|------|-----|
| 0    | 30  |
| 2    | 30  |
| 30   | 100 |

Macrocyclic Product **S4a**

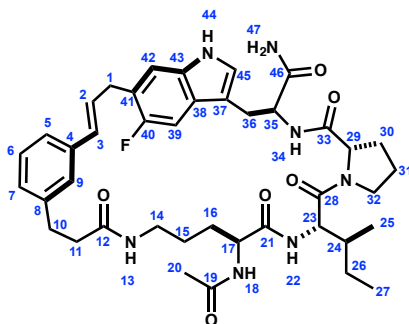

(500 MHz, DMSO-*d*<sub>6</sub>, 298K)

|    | <b>13C</b>            | <b>1H</b>                                            | <b>key correlation</b>                      |
|----|-----------------------|------------------------------------------------------|---------------------------------------------|
| 1  | 31.9                  | 3.58 (br d, J = 5.8 Hz, 2H)                          | HMBC 1→2,3,41,42                            |
| 2  | 129.3                 | 6.38 (dt, J = 15.8, 5.8 Hz, 1H)                      | TOCSY 2→1 HMBC 2→4,41                       |
| 3  | 129.6                 | 6.32 (d, J = 15.8 Hz, 1H)                            | HMBC 3→5,9                                  |
| 4  | 136.9                 | -                                                    |                                             |
| 5  | 123.7                 | 7.15-7.19 (m, 1H) overlap                            |                                             |
| 6  | 128.4                 | 7.16-7.21 (m, 1H) overlap                            | HMBC 6→4,8                                  |
| 7  | 127.1                 | 6.99-7.04 (m, 1H) overlap                            |                                             |
| 8  | 141.5                 | -                                                    |                                             |
| 9  | 124.8                 | 7.15 (br s, 1H) overlap                              |                                             |
| 10 | 30.9                  | 2.71 (t, J = 7.8 Hz, 2H)                             | HMBC 10→8,12                                |
| 11 | 36.9                  | 2.27 (br t, J = 7.8 Hz, 2H)                          | HMBC 11→8,12                                |
| 12 | 171.1                 | -                                                    |                                             |
| 13 | -                     | 7.81 (br t, J = 6.0 Hz, 1H)                          | HMBC 13→12 COSY 13→14,14'                   |
| 14 | 37.5                  | 2.77-2.86 (m, 1H), 3.04-3.11 (m, 1H)                 | COSY 14→15                                  |
| 15 | 25.6                  | 1.23-1.32 (m, 2H) overlap                            | COSY 15→16                                  |
| 16 | 29.6                  | 1.26-1.33 (m, 1H) overlap, 1.48-1.55 (m, 1H) overlap |                                             |
| 17 | 51.1                  | 4.24-4.30 (m, 1H)                                    | TOCSY 17→14,15,16,18 HMBC 17→21             |
| 18 | -                     | 7.83 (d, J = 8.4 Hz, 1H)                             | HMBC 18→19                                  |
| 19 | 168.8                 | -                                                    |                                             |
| 20 | 22.1                  | 1.79 (s, 3H)                                         | HMBC 20→19                                  |
| 21 | 171.5                 | -                                                    |                                             |
| 22 | -                     | 7.93 (d, J = 7.7 Hz, 1H)                             | HMBC 22→21                                  |
| 23 | 54.7                  | 4.19 (dd, J = 8.8, 7.7 Hz, 1H)                       | HMBC 23→21,28 TOCSY 23→24,25,26,27          |
| 24 | 35.6                  | 1.63-1.71 (m, 1H) overlap                            |                                             |
| 25 | 14.6                  | 0.87 (d, J = 6.8 Hz, 3H)                             |                                             |
| 26 | 23.8                  | 0.98-1.09 (m, 1H), 1.45-1.54 (m, 1H) overlap         |                                             |
| 27 | 10.3                  | 0.78 (dd, J = 7.4, 7.4 Hz, 3H)                       |                                             |
| 28 | 126.7                 | -                                                    |                                             |
| 29 | 59.3                  | 4.13 (dd, J = 8.3, 5.0 Hz, 1H)                       | COSY 29→30,30' TOCSY 29→30,31,32 HMBC 29→33 |
| 30 | 28.8                  | 1.63-1.70 (m, 1H) overlap                            |                                             |
| 31 | 24.0                  | 1.66-1.78 (m, 1H) overlap, 1.92-2.01 (m, 1H) overlap |                                             |
| 32 | 46.8                  | 3.43-3.50 (m, 1H), 3.67-3.74 (m, 1H)                 |                                             |
| 33 | 171.2                 | -                                                    |                                             |
| 34 | -                     | 7.51 (br d, J = 7.7 Hz, 1H) overlap                  | HMBC 34→33                                  |
| 35 | 53.2                  | 4.48 (ddd, J = 9.7, 7.7, 3.8 Hz, 1H)                 | HMBC 35→37,46                               |
| 36 | 27.2                  | 2.93-3.05 (m, 2H) overlap                            | HMBC 36→37                                  |
| 37 | 110.2                 | -                                                    |                                             |
| 38 | 126.1                 | -                                                    |                                             |
| 39 | 103.5                 | 7.49 (d, JHF = 11.0 Hz, 1H)                          | HMBC 39→40                                  |
| 40 | 155.2 (d, J ≈ 240 Hz) | -                                                    |                                             |
| 41 | 119.9                 | -                                                    |                                             |
| 42 | 112.4                 | 7.22 (d, JHF = 6.4 Hz, 1H)                           | HMBC 42→40                                  |
| 43 | 132.6                 | -                                                    |                                             |
| 44 | -                     | 10.84 (d, J = 1.9 Hz, 1H)                            | HMBC 44→37,38,43                            |
| 45 | 124.2                 | 7.16-7.18 (m, 1H) overlap                            |                                             |
| 46 | 173.6                 | -                                                    |                                             |
| 47 | -                     | 7.02 (br s, 1H) overlap, 7.38 (br s, 1H)             | HMBC 47→46 TOCSY 47→47'                     |

Macrocyclic Product **S4b**

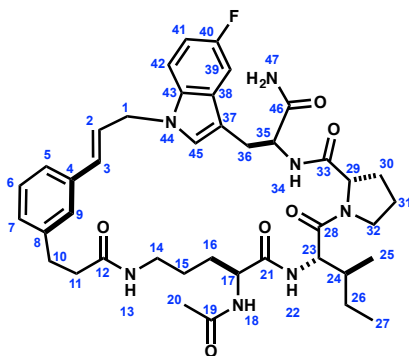

(500 MHz, DMSO-*d*<sub>6</sub>, 298K)

|           | <b>13C</b>                   | <b>1H</b>                                                                             | <b>key correlation</b>        |
|-----------|------------------------------|---------------------------------------------------------------------------------------|-------------------------------|
| <b>1</b>  | 47                           | 4.49 (dd, <i>J</i> = 16.3, 5.6 Hz, 1H), 4.96 (dd, <i>J</i> = 16.6, 5.6 Hz, 1H)        | HMBC 1→43,45                  |
| <b>2</b>  | 125.6                        | 6.33 (ddd, <i>J</i> = 15.8, 5.6, 5.6 Hz, 1H)                                          | TOCSY 2→3,1                   |
| <b>3</b>  | 131.4                        | 6.48 (br d, <i>J</i> = 15.8 Hz, 1H)                                                   | HMBC 3→4                      |
| <b>4</b>  | 136.1                        | -                                                                                     |                               |
| <b>5</b>  | 124.3                        | 7.16-7.19 (m, 1H) overlap                                                             |                               |
| <b>6</b>  | 128.3                        | 7.14-7.19 (m, 1H) overlap                                                             | HMBC 6→4,8                    |
| <b>7</b>  | 127.6                        | 7.03-7.07 (m, 1H)                                                                     |                               |
| <b>8</b>  | 141.7                        | -                                                                                     |                               |
| <b>9</b>  | 125.8                        | 7.15 (br s, 1H)                                                                       |                               |
| <b>10</b> | 30.6                         | 2.72 (t, <i>J</i> = 7.5 Hz, 2H)                                                       | HMBC 10→8,12                  |
| <b>11</b> | 36.7                         | 2.23-2.32 (m, 2H)                                                                     | HMBC 11→8,12                  |
| <b>12</b> | 171.2                        | -                                                                                     |                               |
| <b>13</b> | -                            | 7.69 (br t, <i>J</i> = 5.7 Hz, 1H)                                                    | HMBC 13→12 COSY 13→14         |
| <b>14</b> | 37.3                         | 2.82-2.90 (m, 1H), 2.97-3.03 (m, 1H)                                                  | COSY 14→15                    |
| <b>15</b> | 25.4                         | 1.15-1.24 (m, 2H)                                                                     | COSY 15→16,16' TOCSY 15→16,17 |
| <b>16</b> | 29                           | 1.27-1.34 (m, 1H), 1.39-1.46 (m, 1H)                                                  | HMBC 16→17 COSY 16→17         |
| <b>17</b> | 51.6                         | 4.22-4.28 (m, 1H)                                                                     | HMBC 17→21                    |
| <b>18</b> | -                            | 7.89 (d, <i>J</i> = 8.0 Hz, 1H)                                                       |                               |
| <b>19</b> | 169.1                        | -                                                                                     |                               |
| <b>20</b> | 22                           | 1.79 (s, 3H)                                                                          |                               |
| <b>21</b> | 171.7                        | -                                                                                     |                               |
| <b>22</b> | -                            | 7.99 (d, <i>J</i> = 8.6 Hz, 1H)                                                       | HMBC 22→21                    |
| <b>23</b> | 54.4                         | 4.25-4.30 (m, 1H)                                                                     |                               |
| <b>24</b> | 35.6                         | 1.67-1.74 (m, 1H)                                                                     |                               |
| <b>25</b> | 15.1                         | 0.81 (d, <i>J</i> = 6.7 Hz, 3H)                                                       |                               |
| <b>26</b> | 23.5                         | 0.95-1.03 (m, 1H), 1.43-1.51 (m, 1H)                                                  |                               |
| <b>27</b> | 10.6                         | 0.76 (t, <i>J</i> = 7.4 Hz, 3H)                                                       |                               |
| <b>28</b> | 170.3                        | -                                                                                     |                               |
| <b>29</b> | 59.7                         | 4.16 (dd, <i>J</i> = 8.2, 5.0 Hz, 1H)                                                 | TOCSY 29→30,31,32 HMBC 29→33  |
| <b>30</b> | 28.7                         | 1.57-1.65 (m, 1H), 1.84-1.89 (m, 1H)                                                  |                               |
| <b>31</b> | 23.8                         | 1.59-1.65 (m, 1H), 1.68-1.75 (m, 1H)                                                  |                               |
| <b>32</b> | 46.8                         | 3.45-3.51 (m, 1H), 3.55-3.61 (m, 1H)                                                  |                               |
| <b>33</b> | 171.6                        | -                                                                                     |                               |
| <b>34</b> | -                            | 7.79 (d, <i>J</i> = 8.1 Hz, 1H)                                                       | HMBC 34→33                    |
| <b>35</b> | 52.6                         | 4.36-4.42 (m, 1H)                                                                     | COSY 35→36 HMBC 35→46         |
| <b>36</b> | 26.5                         | 2.96-3.03 (m, 1H), 3.08-3.14 (m, 1H)                                                  | HMBC 36→35,37                 |
| <b>37</b> | 110.4                        | -                                                                                     |                               |
| <b>38</b> | 128.1                        | -                                                                                     |                               |
| <b>39</b> | 103.4                        | 7.37 (dd, <i>J</i> <sub>HF</sub> = 10.1, <i>J</i> <sub>HH</sub> = 2.4 Hz, 1H)         | HMBC 39→40,43                 |
| <b>40</b> | 156.9 (d, <i>J</i> = 230 Hz) | -                                                                                     |                               |
| <b>41</b> | 108.9                        | 6.93 (ddd, <i>J</i> <sub>HF</sub> = 9.4 Hz, <i>J</i> <sub>HH</sub> = 8.9, 2.4 Hz, 1H) | HMBC 41→43                    |
| <b>42</b> | 110.6                        | 7.44 (dd, <i>J</i> <sub>HH</sub> = 8.9 Hz, <i>J</i> <sub>HF</sub> = 4.5 Hz, 1H)       | HMBC 42→38,40                 |
| <b>43</b> | 132.5                        | -                                                                                     |                               |
| <b>44</b> | -                            | -                                                                                     |                               |
| <b>45</b> | 128.7                        | 7.35 (br s, 1H)                                                                       | HMBC 45→37,38,43              |
| <b>46</b> | 173.3                        | -                                                                                     |                               |
| <b>47</b> | -                            | 7.11 (br s, 1H), 7.27 (br s, 1H)                                                      | TOCSY 47→47'                  |

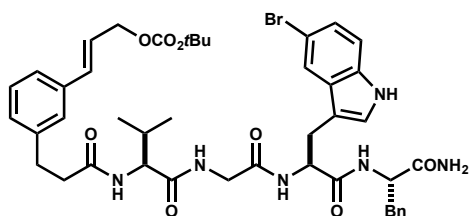

**Acyclic Cinnamyl Carbonate S5:** Synthesized according to Procedure A. Purified via SiO<sub>2</sub> chromatography using a gradient from 1% to 10% methanol in chloroform. <sup>1</sup>H NMR (DMSO-*d*<sub>6</sub>, 500 MHz): δ 0.77 (d, *J* = 6.8 Hz, 3H), 0.78 (d, *J* = 6.8 Hz, 3H), 1.43 (s, 9H), 1.86-1.96 (m, 1H), 2.41 (ddd, *J* = 14.5, 8.7, 5.9 Hz, 1H), 2.55 (dd, *J* = 14.5, 8.3 Hz, 1H), 2.72-2.88 (m, 4H), 3.03 (apt dt, *J* = 14.1, 4.9 Hz, 2H), 3.55 (dd, *J* = 16.6, 5.4 Hz, 1H), 3.74 (dd, *J* = 16.6, 6.0 Hz, 1H), 4.11 (dd, *J* = 8.2, 6.9 Hz, 1H), 4.42 (ddd, *J* = 8.6, 8.6, 5.1 Hz, 1H), 4.47 (ddd, *J* = 9.0, 8.1, 4.8 Hz, 1H), 4.66 (dd, *J* = 6.2, 1.1 Hz, 2H), 6.31 (dt, *J* = 15.9, 6.2 Hz, 1H), 6.61 (br d, *J* = 15.9 Hz, 1H), 7.05-7.11 (m, 2H), 7.13-7.30 (m, 12H), 7.74 (d, *J* = 1.9 Hz, 1H), 7.88 (d, *J* = 8.3 Hz, 1H), 8.02 (d, *J* = 8.0 Hz, 1H), 8.08 (d, *J* = 8.3 Hz, 1H), 8.16 (t, *J* = 5.7 Hz, 1H), 11.01 (d, *J* = 1.9 Hz, 1H). <sup>13</sup>C NMR (DMSO-*d*<sub>6</sub>, 126 MHz): δ 173.2, 172.2, 172.1, 171.5, 169.2, 153.3, 142.1, 138.4, 136.3, 135.2, 133.9, 129.7, 129.6, 129.0, 128.5 (2), 126.8, 126.7, 125.9, 124.7, 123.74, 123.70, 121.1, 113.8, 111.5, 110.4, 82.0, 67.4, 58.5, 54.5, 53.9, 42.4, 37.8, 36.9, 31.4, 30.6, 27.8, 19.6, 18.6

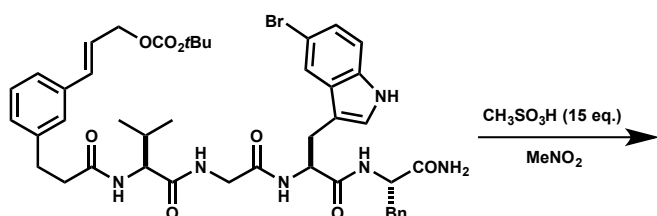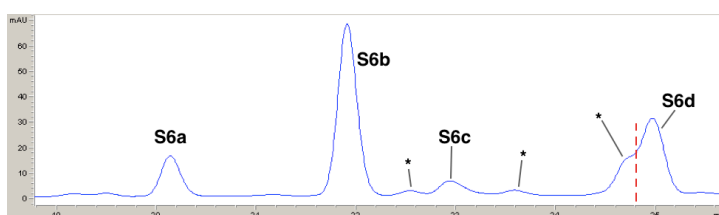

\*Unidentified isomeric products

MS *m/z* 755.0 (calc'd: C<sub>45</sub>H<sub>42</sub>FN<sub>6</sub>O<sub>5</sub>, [M+H]<sup>+</sup>, 755.2).

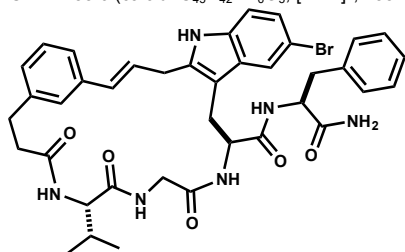

**S6a**

MS *m/z* 755.0 (calc'd: C<sub>45</sub>H<sub>42</sub>FN<sub>6</sub>O<sub>5</sub>, [M+H]<sup>+</sup>, 755.2).

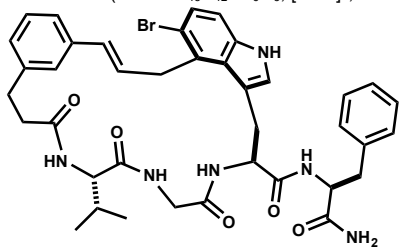

**S6c**

MS *m/z* 755.0 (calc'd: C<sub>45</sub>H<sub>42</sub>FN<sub>6</sub>O<sub>5</sub>, [M+H]<sup>+</sup>, 755.2).

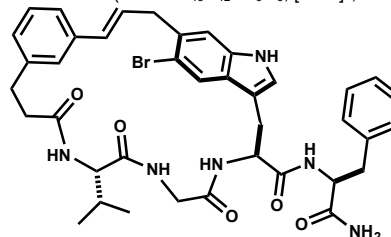

**S6b**

MS *m/z* 755.0 (calc'd: C<sub>45</sub>H<sub>42</sub>FN<sub>6</sub>O<sub>5</sub>, [M+H]<sup>+</sup>, 755.2).

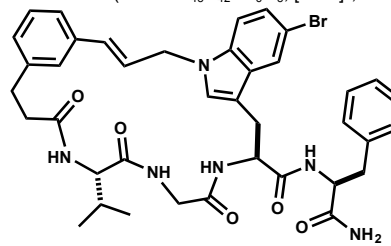

**S6d**

**Analytical HPLC Method**

Column: Waters Sunfire™ C<sub>18</sub>,  
4.6x250 mm, 5 μm  
Solvent A: H<sub>2</sub>O + 0.1% TFA  
Solvent B: ACN + 0.1% TFA  
Flow rate: 1.00 mL/min

| Time | %B |
|------|----|
| 0    | 30 |
| 2    | 30 |
| 30   | 60 |

**Preparative HPLC method A:**

Column: Waters XBridge™ C<sub>18</sub>,  
19x250mm, 5μm.  
Solvent A: H<sub>2</sub>O + 0.1%v TFA  
Solvent B: ACN + 0.1%v TFA  
Flow rate: 18.00 ml/min

| Time | %B  |
|------|-----|
| 0    | 30  |
| 2    | 30  |
| 30   | 100 |

Macrocyclic Product **S6a**

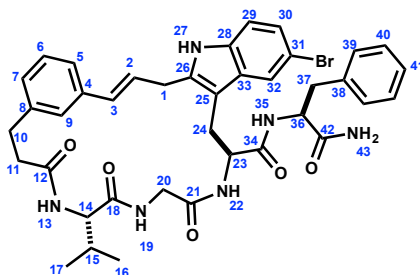

(500 MHz, DMSO-*d*<sub>6</sub>, 298K)

|    | 13C    | 1H                                                                             | key correlation                  |
|----|--------|--------------------------------------------------------------------------------|----------------------------------|
| 1  | 28.3   | 3.53 (dd, <i>J</i> = 17.2, 5.9 Hz, 1H), 3.81 (dd, <i>J</i> = 17.2, 5.9 Hz, 1H) | HMBC 1→25,26                     |
| 2  | 127.6  | 6.56 (ddd, <i>J</i> = 16.0, 5.9, 5.9 Hz, 1H)                                   | HMBC 2→4, COSY 2→1               |
| 3  | 130.2  | 6.37 (br d, <i>J</i> = 16.0 Hz, 1H)                                            |                                  |
| 4  | 136.9  | -                                                                              |                                  |
| 5  | 123    | 7.26 (d, <i>J</i> = 7.9 Hz, 1H) overlap                                        | HMBC 5→9,3                       |
| 6  | 127.97 | 7.18 (dd, <i>J</i> = 7.9, 7.9 Hz, 1H) overlap                                  | HMBC 6→4,8                       |
| 7  | 127.95 | 6.99 (d, <i>J</i> = 7.9 Hz, 1H) overlap                                        |                                  |
| 8  | 140.7  | -                                                                              |                                  |
| 9  | 124.9  | 7.20 (s, 1H) overlap                                                           |                                  |
| 10 | 29.8   | 2.73-2.78 (m, 1H) overlap, 2.89-2.96 (m, 1H) overlap                           | HMBC 10→9                        |
| 11 | 34     | 2.34-2.40 (m, 1H), 2.72-2.79 (m, 1H) overlap                                   | TOCSY 11→11',10                  |
| 12 | 171.3  | -                                                                              |                                  |
| 13 | -      | 7.78 (d, <i>J</i> = 9.1 Hz, 1H)                                                | TOCSY 13→14,15,16,17, HMBC 13→12 |
| 14 | 58     | 3.92 (dd, <i>J</i> = 9.1, 6.0 Hz, 1H)                                          | HMBC 14→18                       |
| 15 | 29.1   | 1.92-1.98 (m, 1H)                                                              |                                  |
| 16 | 17.6   | 0.76 (d, <i>J</i> = 3.7 Hz, 3H)                                                |                                  |
| 17 | 19     | 0.77 (d, <i>J</i> = 3.7 Hz, 3H)                                                |                                  |
| 18 | 170.8  | -                                                                              |                                  |
| 19 | -      | 6.97 (dd, <i>J</i> = 8.0, 2.9 Hz, 1H) overlap                                  |                                  |
| 20 | 41.1   | 3.12 (dd, <i>J</i> = 16.7, 2.9 Hz, 1H), 3.76 (dd, <i>J</i> = 16.7, 8.0 Hz, 1H) | TOCSY 20→19, HMBC 20→18,21       |
| 21 | 167.6  | -                                                                              |                                  |
| 22 | -      | 8.04-8.08 (m, 1H) overlap                                                      | HMBC 22→21                       |
| 23 | 53.1   | 4.51-4.56 (m, 1H)                                                              | HMBC 23→34                       |
| 24 | 26.7   | 2.72-2.79 (m, 1H) overlap, 2.96-3.00 (m, 1H) obscured                          | HMBC 24→25,26,33,34              |
| 25 | 106.6  | -                                                                              |                                  |
| 26 | 136.4  | -                                                                              |                                  |
| 27 | -      | 11.00 (s, 1H)                                                                  |                                  |
| 28 | 134.1  | -                                                                              |                                  |
| 29 | 112.3  | 7.21 (d, <i>J</i> = 8.5 Hz, 1H) overlap                                        | HMBC 29→31                       |
| 30 | 122.5  | 7.12 (dd, <i>J</i> = 8.5, 1.6 Hz, 1H)                                          | HMBC 30→28,31                    |
| 31 | 110.7  | -                                                                              |                                  |
| 32 | 120    | 7.73 (d, <i>J</i> = 1.6 Hz, 1H)                                                | HMBC 32→25,28,30,31              |
| 33 | 129.8  | -                                                                              |                                  |
| 34 | 171.1  | -                                                                              |                                  |
| 35 | -      | 8.04-8.08 (m, 1H) overlap                                                      | HMBC 35→34                       |
| 36 | 53.5   | 4.49 (ddd, <i>J</i> = 9.0, 8.0, 5.0 Hz, 1H)                                    | HMBC 36→34,38,42                 |
| 37 | 37.3   | 2.86 (dd, <i>J</i> = 13.7, 9.0 Hz, 1H), 3.05 (dd, <i>J</i> = 13.7, 5.0 Hz, 1H) | HMBC 37→38,39                    |
| 38 | 137.5  | -                                                                              |                                  |
| 39 | 129    | 7.22 (d, <i>J</i> = 7.7 Hz, 2H) overlap                                        |                                  |
| 40 | 127.9  | 7.26 (dd, <i>J</i> = 7.7, 7.7 Hz, 2H) overlap                                  | HMBC 40→38                       |
| 41 | 126    | 7.15-7.18 (m, 1H) overlap                                                      |                                  |
| 42 | 172.4  | -                                                                              |                                  |
| 43 | -      | 7.15 (br s, 1H), 7.46 (br s, 1H)                                               | HMBC 43→42, TOCSY 43→43'         |



Macrocyclic Product **S6b**

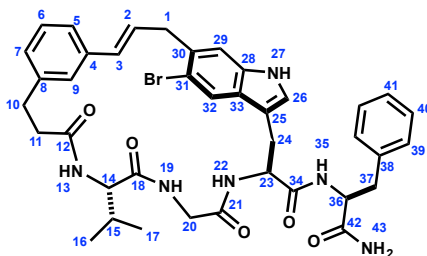

(600 MHz, DMSO-*d*<sub>6</sub>, 298K)

|    | 13C   | 1H                                                                                             | key correlation              |
|----|-------|------------------------------------------------------------------------------------------------|------------------------------|
| 1  | 38.3  | 3.61-3.67 (m, 1H) overlap, 3.69-3.75 (m, 1H) overlap                                           | HMBC 1→3                     |
| 2  | 129   | 6.40 (ddd, <i>J</i> = 16.0, 5.6, 5.6 Hz, 1H)                                                   | HMBC 2→4, COSY 2→1           |
| 3  | 129.1 | 6.08 (br d, <i>J</i> = 16.0 Hz, 1H)                                                            | HMBC 3→4,5,9                 |
| 4  | 137   | -                                                                                              |                              |
| 5  | 122.6 | 7.21 (br d, <i>J</i> = 8.0 Hz, 1H)                                                             | HMBC 5→3,7,9                 |
| 6  | 127.6 | 7.17 (dd, <i>J</i> = 8.0, 8.0 Hz, 1H) overlap                                                  | HMBC 6→8,4                   |
| 7  | 126.7 | 6.99 (d, <i>J</i> = 8.0 Hz, 1H) overlap                                                        |                              |
| 8  | 140.9 | -                                                                                              |                              |
| 9  | 124.5 | 6.99 (br s, 1H) overlap                                                                        | HMBC 9→3,5,7                 |
| 10 | 29.1  | 2.68-2.74 (m, 1H), 2.86-2.92 (m, 1H) overlap                                                   | HMBC 10→8                    |
| 11 | 34.3  | 2.42-2.48 (m, 1H), 2.53-2.59 (m, 1H)                                                           | HMBC 11→8                    |
| 12 | 170.9 | -                                                                                              |                              |
| 13 | -     | 7.39 (d, <i>J</i> = 8.7 Hz, 1H)                                                                | HMBC 13→12                   |
| 14 | 57.8  | 3.92 (dd, <i>J</i> = 8.7, 5.9 Hz, 1H)                                                          | COSY 14→13, HMBC 14→18       |
| 15 | 29.5  | 1.83-1.90 (m, 1H)                                                                              | COSY 15→14                   |
| 16 | 17    | 0.68 (d, <i>J</i> = 6.7 Hz, 3H) overlap                                                        | COSY 16→15                   |
| 17 | 18.6  | 0.69 (d, <i>J</i> = 6.6 Hz, 3H) overlap                                                        |                              |
| 18 | 170.3 | -                                                                                              |                              |
| 19 | -     | 7.26-7.31 (m, 1H) overlap                                                                      |                              |
| 20 | 40.8  | 3.09-3.17 (m, 1H) overlap, 3.66-3.72 (m, 1H) overlap                                           | HMBC 20→18,21                |
| 21 | 167.4 | -                                                                                              |                              |
| 22 | -     | 7.75-7.86 (m, 1H) overlap                                                                      |                              |
| 23 | 54.8  | 4.50-4.56 (m, 1H) overlap                                                                      | COSY 23→22                   |
| 24 | 27.6  | 2.76-2.82 (m, 1H), 3.04-3.10 (m, 1H) overlap                                                   |                              |
| 25 | 109.9 | -                                                                                              |                              |
| 26 | 124.4 | 7.13 (d, <i>J</i> = 2.1 Hz, 1H)                                                                | HMBC 26→25,28,33, COSY 26→27 |
| 27 | -     | 10.71 (br s, 1H)                                                                               | HMBC 27→25,26,28,33          |
| 28 | 135.1 | -                                                                                              |                              |
| 29 | 113.1 | 7.31 (s, 1H)                                                                                   | HMBC 29→1                    |
| 30 | 129.6 | -                                                                                              |                              |
| 31 | 113.8 | -                                                                                              |                              |
| 32 | 121.9 | 8.00 (s, 1H)                                                                                   | HMBC 32→25,28,30,31          |
| 33 | 128.1 | -                                                                                              |                              |
| 34 | 170.5 | -                                                                                              |                              |
| 35 | -     | 7.84 (d, <i>J</i> = 8.1 Hz, 1H) overlap                                                        | HMBC 35→34                   |
| 36 | 53.1  | 4.56 (ddd, <i>J</i> = 8.5, 8.1, 5.4 Hz, 1H) overlap                                            | HMBC 36→38,42                |
| 37 | 37.2  | 2.91 (dd, <i>J</i> = 13.9, 8.5 Hz, 1H) overlap, 3.10 (dd, <i>J</i> = 13.9, 5.4 Hz, 1H) overlap | HMBC 37→38,39                |
| 38 | 137.4 | -                                                                                              |                              |
| 39 | 128.6 | 7.25-7.28 (m, 2H) overlap                                                                      | HMBC 39→41                   |
| 40 | 127.5 | 7.25-7.28 (m, 2H) overlap                                                                      | HMBC 40→38                   |
| 41 | 125.5 | 7.16-7.20 (m, 1H) overlap                                                                      |                              |
| 42 | 172.1 | -                                                                                              |                              |
| 43 | -     | Not observed                                                                                   |                              |

Macrocyclic Product **S6c**

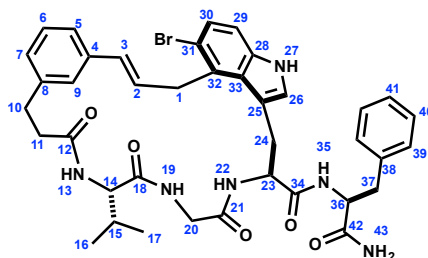

(500 MHz, DMSO-*d*<sub>6</sub>, 298K)

|           | <b>13C</b> | <b>1H</b>                                                                         | <b>key correlation</b>           |
|-----------|------------|-----------------------------------------------------------------------------------|----------------------------------|
| <b>1</b>  | 34.9       | 3.93 (br dd, <i>J</i> = 16.6, 4.1 Hz, 1H), 4.03 (dd, <i>J</i> = 16.6, 6.3 Hz, 1H) | HMBC 1→31,33                     |
| <b>2</b>  | 128.2      | 6.42 (ddd, <i>J</i> = 16.0, 6.3, 4.1 Hz, 1H)                                      | COSY 2→1, HMBC 2→4,5             |
| <b>3</b>  | 129.8      | 6.13 (br d, <i>J</i> = 16.0 Hz, 1H)                                               |                                  |
| <b>4</b>  | 136.8      | -                                                                                 |                                  |
| <b>5</b>  | 123.1      | 6.99 (dd, <i>J</i> = 7.9 Hz, 1H) overlap                                          |                                  |
| <b>6</b>  | 127.9      | 7.14-7.19 (m, 1H) overlap                                                         | HMBC 6→8,4                       |
| <b>7</b>  | 127.3      | 7.09 (d, <i>J</i> = 7.9 Hz, 1H) overlap                                           | HMBC 7→10                        |
| <b>8</b>  | 141.3      | -                                                                                 |                                  |
| <b>9</b>  | 124.62     | 7.28 (br s, 1H)                                                                   | HMBC 9→10,5,7                    |
| <b>10</b> | 29.3       | 2.68-2.75 (m, 1H) overlap, 2.96-3.03 (m, 1H) overlap                              | HMBC 10→7,8,9                    |
| <b>11</b> | 34.3       | 2.40-2.47 (m, 1H), 2.69-2.77 (m, 1H) overlap                                      | HMBC 11→8                        |
| <b>12</b> | 171.7      | -                                                                                 |                                  |
| <b>13</b> | -          | 7.95 (d, <i>J</i> = 8.6 Hz, 1H)                                                   | TOCSY 13→14,15,16,17, HMBC 13→12 |
| <b>14</b> | 57.5       | 4.24 (dd, <i>J</i> = 8.6, 5.6 Hz, 1H)                                             | HMBC 14→18                       |
| <b>15</b> | 30.1       | 2.03-2.11 (m, 1H)                                                                 | HMBC 15→18                       |
| <b>16</b> | 17.3       | 0.78 (d, <i>J</i> = 6.9 Hz, 3H)                                                   |                                  |
| <b>17</b> | 19.1       | 0.82 (d, <i>J</i> = 6.9 Hz, 3H)                                                   |                                  |
| <b>18</b> | 171        | -                                                                                 |                                  |
| <b>19</b> | -          | 7.82-7.86 (m, 1H) overlap                                                         | HMBC 19→18                       |
| <b>20</b> | 42.3       | 3.58 (dd, <i>J</i> = 16.4, 4.8 Hz, 1H), 3.78 (dd, <i>J</i> = 16.4, 6.1 Hz, 1H)    | COSY 20→19, HMBC 20→18           |
| <b>21</b> | 168.2      | -                                                                                 |                                  |
| <b>22</b> | -          | 8.11 (d, <i>J</i> = 8.1 Hz, 1H)                                                   | HMBC 22→21                       |
| <b>23</b> | 54         | 4.59 (ddd, <i>J</i> = 8.4, 8.1, 5.9 Hz, 1H)                                       | HMBC 23→24                       |
| <b>24</b> | 29.3       | 2.96-3.03 (m, 1H) overlap, 3.15 (dd, <i>J</i> = 14.7, 8.4 Hz, 1H)                 | HMBC 24→25,34                    |
| <b>25</b> | 110.1      | -                                                                                 |                                  |
| <b>26</b> | 125.5      | 6.90 (d, <i>J</i> = 2.2 Hz, 1H)                                                   | HMBC 26→25,33                    |
| <b>27</b> | -          | 11.05 (d, <i>J</i> = 2.2 Hz, 1H)                                                  | HMBC 27→25,26,28,33              |
| <b>28</b> | 135.6      | -                                                                                 |                                  |
| <b>29</b> | 111.6      | 7.17 (d, <i>J</i> = 8.5 Hz, 1H) overlap                                           | HMBC 29→31                       |
| <b>30</b> | 124.55     | 7.25 (d, <i>J</i> = 8.5 Hz, 1H) overlap                                           |                                  |
| <b>31</b> | 114.7      | -                                                                                 |                                  |
| <b>32</b> | 129.5      | -                                                                                 |                                  |
| <b>33</b> | 126.3      | -                                                                                 |                                  |
| <b>34</b> | 170        | -                                                                                 |                                  |
| <b>35</b> | -          | 7.85 (d, <i>J</i> = 8.3 Hz, 1H)                                                   | HMBC 35→34                       |
| <b>36</b> | 53.6       | 4.39 (ddd, <i>J</i> = 8.5, 8.3, 5.3 Hz, 1H)                                       | HMBC 36→34,42                    |
| <b>37</b> | 37.2       | 2.74-2.81 (m, 1H) overlap, 2.96-3.02 (m, 1H) overlap                              | HMBC 37→38,39,42                 |
| <b>38</b> | 137.4      | -                                                                                 |                                  |
| <b>39</b> | 128.9      | 7.18 (d, <i>J</i> = 7.7 Hz, 2H) overlap                                           | HMBC 39→37                       |
| <b>40</b> | 127.8      | 7.20-7.25 (m, 2H) overlap                                                         |                                  |
| <b>41</b> | 126        | 7.14-7.19 (m, 1H) overlap                                                         |                                  |
| <b>42</b> | 172        | -                                                                                 |                                  |
| <b>43</b> | -          | 6.99 (br s, 1H) overlap, 7.10 (br s, 1H) overlap                                  | TOCSY 43→43', HMBC 43→42         |

Macrocyclic Product **S6d**

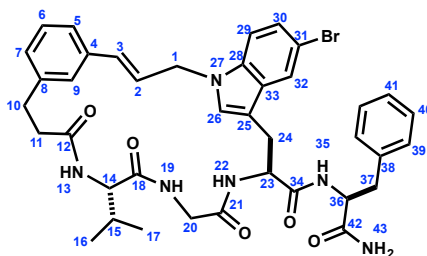

(500 MHz, DMSO-*d*<sub>6</sub>, 298K)

|           | <b>13C</b> | <b>1H</b>                                                                      | <b>key correlation</b>          |
|-----------|------------|--------------------------------------------------------------------------------|---------------------------------|
| <b>1</b>  | 46.8       | 4.85 (dd, <i>J</i> = 16.7, 6.1 Hz, 1H), 4.91 (dd, <i>J</i> = 16.7, 5.2 Hz, 1H) | HMBC 1→2,3,28.                  |
| <b>2</b>  | 125.6      | 6.51 (ddd, <i>J</i> = 15.9, 6.1, 5.2 Hz, 1H)                                   | COSY 2→3,1 HMBC 2→4             |
| <b>3</b>  | 131.5      | 6.34 (d, <i>J</i> = 15.9 Hz, 1H)                                               |                                 |
| <b>4</b>  | 135.8      | -                                                                              |                                 |
| <b>5</b>  | 123.5      | 7.20-7.23 (m, 1H)                                                              | HMBC 5→3                        |
| <b>6</b>  | 127.7      | 7.16-7.20 (m, 1H)                                                              | HMBC 6→4,8                      |
| <b>7</b>  | 128.1      | 7.03 (br d, <i>J</i> = 7.3 Hz, 1H)                                             |                                 |
| <b>8</b>  | 140.6      | -                                                                              |                                 |
| <b>9</b>  | 125.8      | 7.24 (br s, 1H)                                                                | HMBC 9→5,7                      |
| <b>10</b> | 30.1       | 2.72-2.79 (m, 1H), 2.85-2.93 (m, 1H)                                           |                                 |
| <b>11</b> | 34.7       | 2.37 (ddd, <i>J</i> = 14.4, 7.8, 3.7 Hz, 1H), 2.65-2.72 (m, 1H)                | HMBC 11→8,12 TOCSY 11→11',10,1' |
| <b>12</b> | 171.3      | -                                                                              |                                 |
| <b>13</b> | -          | 7.77 (d, <i>J</i> = 8.6 Hz, 1H)                                                | HMBC 13→12 TOCSY 13→14,15,16,17 |
| <b>14</b> | 57.9       | 3.89 (dd, <i>J</i> = 8.6, 6.2 Hz, 1H)                                          | HMBC 14→18                      |
| <b>15</b> | 29.1       | 1.90-1.99 (m, 1H)                                                              |                                 |
| <b>16</b> | 17.7       | 0.77 (d, <i>J</i> = 6.9 Hz, 3H)                                                |                                 |
| <b>17</b> | 18.7       | 0.78 (d, <i>J</i> = 6.8 Hz, 3H)                                                |                                 |
| <b>18</b> | 170.6      | -                                                                              |                                 |
| <b>19</b> | -          | 7.20-7.23 (m, 1H)                                                              | HMBC 19→18                      |
| <b>20</b> | 40.9       | 3.14 (dd, <i>J</i> = 16.8, 4.4 Hz, 1H), 3.63 (dd, <i>J</i> = 16.8, 7.0 Hz, 1H) | HMBC 20→18,21 TOCSY 20→19       |
| <b>21</b> | 167.6      | -                                                                              |                                 |
| <b>22</b> | -          | 8.00 (d, <i>J</i> = 9.1 Hz, 1H)                                                | HMBC 22→21 TOCSY 22→23,24       |
| <b>23</b> | 51.9       | 4.56 (ddd, <i>J</i> = 11.4, 9.1, 3.1 Hz, 1H)                                   | HMBC 23→25                      |
| <b>24</b> | 27.2       | 2.66-2.73 (m, 1H), 3.04-3.10 (m, 1H)                                           | HMBC 24→25,26,33                |
| <b>25</b> | 109.8      | -                                                                              |                                 |
| <b>26</b> | 128        | 7.23 (br s, 1H)                                                                | HMBC 26→25                      |
| <b>27</b> | -          | -                                                                              |                                 |
| <b>28</b> | 134.3      | -                                                                              |                                 |
| <b>29</b> | 111.7      | 7.42 (d, <i>J</i> = 8.8 Hz, 1H)                                                | HMBC 29→31,33                   |
| <b>30</b> | 123.1      | 7.19-7.24 (m, 1H)                                                              | HMBC 30→31                      |
| <b>31</b> | 110.8      | -                                                                              |                                 |
| <b>32</b> | 121.1      | 7.84 (d, <i>J</i> = 1.9 Hz, 1H)                                                | HMBC 32→28,31                   |
| <b>33</b> | 129.1      | -                                                                              |                                 |
| <b>34</b> | 170.9      | -                                                                              |                                 |
| <b>35</b> | -          | 8.21 (d, <i>J</i> = 8.1 Hz, 1H)                                                | HMBC 35→34 TOCSY 35→36,37       |
| <b>36</b> | 53.4       | 4.49 (ddd, <i>J</i> = 8.9, 8.1, 4.9 Hz, 1H)                                    | HMBC 36→38,42                   |
| <b>37</b> | 37.1       | 2.85 (dd, <i>J</i> = 13.8, 8.9 Hz, 1H), 3.04 (dd, <i>J</i> = 13.8, 4.9 Hz, 1H) | HMBC 37→38                      |
| <b>38</b> | 137.5      | -                                                                              |                                 |
| <b>39</b> | 128.9      | 7.22-7.25 (m, 2H)                                                              | TOCSY 39→41                     |
| <b>40</b> | 127.5      | 7.24-7.28 (m, 2H)                                                              | HMBC 40→38                      |
| <b>41</b> | 126        | 7.15-7.19 (m, 1H)                                                              | HMBC 41→39                      |
| <b>42</b> | 172.4      | -                                                                              |                                 |
| <b>43</b> | -          | 7.11 (br s, 1H), 7.43 (br s, 1H)                                               | TOCSY 43→43' HMBC 43→42         |

## D.2. Synthesis of pyrroloindoline isomerization model system **21a&b**

**N-Acetyl-L-tryptophan isopropyl amide (S7):** Boc-L-Tryptophan (1.52 g, 5 mmol) was dissolved in DMF and cooled in an ice bath, then treated with HBTU (2.08 g, 5.5 mmol). The mixture was stirred cold for 10 min, then  $i\text{Pr}_2\text{NH}$  (1.05 mL, 6 mmol) was added. The mixture was stirred at rt for 30 min, then concentrated, re-dissolved in EtOAc and washed successively with  $\text{NaHCO}_3$ , 1M HCl, brine, dried over  $\text{Na}_2\text{SO}_4$  and concentrated. The resulting residue was treated with 4N HCl in dioxane for 30 min, then concentrated and re-dissolved in DMF. The mixture was rendered basic by the addition of  $i\text{Pr}_2\text{EtN}$ , cooled to 0 °C and treated with  $\text{Ac}_2\text{O}$  (708  $\mu\text{L}$ , 7.5 mmol). The mixture was stirred at rt for 30 min, then concentrated, re-dissolved in EtOAc and washed successively with  $\text{NaHCO}_3$ , 1N HCl, brine, dried over  $\text{Na}_2\text{SO}_4$  and concentrated. The residue was triturated with hexanes: $\text{CHCl}_3$  (1:1) and the resulting solid was collected by filtration to give **S7** (1.26 g, 73%) as a white solid.  $^1\text{H}$  NMR (DMSO- $d_6$ , 400 MHz):  $\delta$  0.92 (d,  $J$  = 6.6 Hz, 3H), 1.02 (d,  $J$  = 6.6 Hz, 3H), 1.78 (s, 3H), 2.88 (dd,  $J$  = 14.5, 8.2 Hz, 1H), 3.01 (dd,  $J$  = 14.5, 5.8 Hz, 1H), 3.72-3.86 (m, 1H), 4.46 (ddd,  $J$  = 8.6, 8.2, 5.9 Hz, 1H), 6.96 (ddd,  $J$  = 8.0, 7.0, 1.0 Hz, 1H), 7.04 (ddd,  $J$  = 8.1, 7.0, 1.1 Hz, 1H), 7.30 (ddd,  $J$  = 8.0, 1.1, 1.0 Hz, 1H), 7.58 (br d,  $J$  = 7.8 Hz, 1H), 7.75 (d,  $J$  = 7.7 Hz, 1H), 7.96 (d,  $J$  = 8.3 Hz, 1H), 10.75-10.79 (m, 1H).  $^{13}\text{C}$  NMR (DMSO- $d_6$ , 101 MHz):  $\delta$  175.7, 174.1, 141.2, 132.6, 128.7, 126.0, 123.8, 123.3, 116.4, 115.4, 58.6, 33.5, 27.8, 27.5, 27.4. MS  $m/z$  288.4 (calc'd:  $\text{C}_{16}\text{H}_{22}\text{N}_3\text{O}_2$   $[\text{M}+\text{H}]^+$ , 288.4).

**endo-Pyrroloindoline (21a) and exo-pyrroloindoline (21b):** Anhydrous DCM was vigorously sparged with argon for 15 min. To a vial was added *N*-acetyl-L-tryptophan isopropyl amide (**S7**, 345 mg, 1 mmol), cinnamyl alcohol (147 mg, 1.1 mmol) and  $\text{Pd}(\text{PPh}_3)_4$  (58 mg, 0.05 mmol), and the vessel was evacuated and backfilled with argon (x3). DCM (2.5 mL) was added, the mixture was cooled in an ice bath, and  $\text{Et}_3\text{B}$  (1.0 M in hexanes, 1.2 mL) was added in one portion. The resulting suspension was stirred at 0 °C for 9 hrs, then diluted with EtOAc and washed with sat.  $\text{NaHCO}_3$  (x2), brine, dried over  $\text{Na}_2\text{SO}_4$  and concentrated. Purification by column chromatography on  $\text{SiO}_2$  eluted with 0→8% MeOH in  $\text{CHCl}_3$  afforded **21a** (150 mg, 37%) and **21b** (146 mg, 36%). **21a:**  $R_f$  = 0.61, 6% MeOH/ $\text{CHCl}_3$ ,  $^1\text{H}$  NMR ( $\text{CDCl}_3$ , 500 MHz, major rotamer):  $\delta$  0.48 (d,  $J$  = 6.6 Hz, 3H), 0.90 (d,  $J$  = 6.6 Hz, 3H), 2.01 (s, 3H), 2.49 (dd,  $J$  = 13.8, 8.3 Hz, 1H), 2.59 (ddd,  $J$  = 13.8, 6.6, 1.0 Hz, 1H), 2.63-2.67 (m, 2H), 3.56-3.70 (m, 1H), 4.36-4.43 (m, 2H), 5.55 (br s, 1H), 5.99 (ddd,  $J$  = 15.6, 8.3, 7.0 Hz, 1H), 6.08 (d,  $J$  = 7.8 Hz, 1H), 6.40 (d,  $J$  = 15.6 Hz, 1H), 6.61 (d,  $J$  = 7.8 Hz, 1H), 6.77 (dd,  $J$  = 7.4, 7.4 Hz, 1H), 7.04-7.12 (m, 2H), 7.17-7.22 (m, 1H), 7.23-7.29 (m, 4H).  $^{13}\text{C}$  NMR ( $\text{CDCl}_3$ , 126 MHz, major rotamer):  $\delta$  171.3, 170.2, 147.9, 136.9, 134.0, 132.0, 129.0, 128.5, 127.4, 126.1, 124.4, 123.9, 120.1, 109.6, 80.7, 63.0, 55.6, 42.8, 41.1, 40.5, 22.2, 22.2, 21.3. MS  $m/z$  404.2 (calc'd:  $\text{C}_{25}\text{H}_{30}\text{N}_3\text{O}_2$   $[\text{M}+\text{H}]^+$ , 404.2). **21b:**  $R_f$  = 0.50, 6% MeOH/ $\text{CHCl}_3$ ,  $^1\text{H}$  NMR ( $\text{CDCl}_3$ , 600 MHz, major rotamer):  $\delta$  1.17 (d,  $J$  = 6.6 Hz, 3H), 1.18 (d,  $J$  = 6.6 Hz, 3H), 1.92 (s, 3H), 2.37 (dd,  $J$  = 13.1, 7.9 Hz, 1H), 2.58 (br dd,  $J$  = 13.5, 8.0 Hz, 1H), 2.63 (br dd,  $J$  = 13.5, 7.3 Hz, 1H), 2.72 (dd,  $J$  = 13.1, 8.0 Hz, 1H), 4.04-4.08 (m, 1H), 4.09-4.17 (m, 1H), 5.53 (s, 1H), 6.08 (br d,  $J$  = 8.0 Hz, 1H), 6.09 (apt dt,  $J$  = 15.5, 7.7 Hz, 1H), 6.38 (d,  $J$  = 15.5 Hz, 1H), 6.60 (d,  $J$  = 7.7 Hz, 1H), 6.77 (dd,  $J$  = 7.3, 7.3 Hz, 1H), 7.08-7.16 (m, 2H), 7.21-7.26 (m, 1H), 7.24-7.32 (m, 5H).  $^{13}\text{C}$  NMR ( $\text{CDCl}_3$ , 150 MHz, major rotamer):  $\delta$  172.0, 170.9, 148.5, 137.1, 133.8, 128.8, 128.60, 128.58, 127.4, 126.2, 124.9, 123.3, 118.9, 109.7, 82.7, 62.3, 55.0, 41.8, 41.6, 40.6, 22.8, 22.53, 22.50. MS  $m/z$  404.2 (calc'd:  $\text{C}_{25}\text{H}_{30}\text{N}_3\text{O}_2$   $[\text{M}+\text{H}]^+$ , 404.3).

**(S)-2-acetamido-3-(2-cinnamyl-1H-indol-3-yl)-N-isopropylpropanamide (22):** *exo*-Pyrroloindoline **21b** (12.7 mg, 31.5  $\mu\text{mol}$ ) was dissolved in  $\text{MeNO}_2$  (5.0 mL) and treated with TFA (1.3 mL). The mixture was stirred at rt for 30 min, then concentrated and dried thoroughly in vacuo. Purification by column chromatography on  $\text{SiO}_2$  eluted with 0→2% MeOH in  $\text{CHCl}_3$  afforded **22** (9.0 mg, 71%) as a light yellow film.  $R_f$  = 0.48, 6% MeOH/ $\text{CHCl}_3$ .  $^1\text{H}$  NMR ( $\text{CDCl}_3$ , 500 MHz, major rotamer):  $\delta$  0.64 (d,  $J$  = 6.6 Hz, 3H), 0.93 (d,  $J$  = 6.5 Hz, 3H), 1.99 (s, 3H), 3.05 (dd,  $J$  = 14.1, 10.0 Hz, 1H), 3.28 (dd,  $J$  = 14.1, 4.8 Hz, 1H), 3.68 (dd,  $J$  = 16.4, 6.5 Hz, 1H), 3.75 (dd,  $J$  = 16.4, 6.6 Hz, 1H), 3.76-3.85 (m, 1H), 4.60 (ddd,  $J$  = 10.0, 7.3, 4.8 Hz, 1H), 5.07 (br d,  $J$  = 7.3 Hz, 1H), 6.32 (ddd,  $J$  = 15.7, 6.8, 6.8 Hz, 1H), 6.47 (br d,  $J$  = 7.3 Hz, 1H), 6.54 (d,  $J$  = 15.7 Hz, 1H), 7.09-7.18 (m, 2H), 7.21-7.34 (m, 4H), 7.34-7.39 (m, 2H), 7.66 (d,  $J$  = 7.4 Hz, 1H), 7.99 (br s, 1H).  $^{13}\text{C}$  NMR ( $\text{CDCl}_3$ , 126 MHz):  $\delta$  170.3, 170.0, 136.9, 135.5, 134.3, 132.5, 128.8, 128.6, 127.8, 126.3, 126.3, 121.9, 120.0, 118.7, 110.7, 107.3, 54.2, 41.6, 29.9, 28.2, 23.4, 22.6, 21.9. MS  $m/z$  404.2 (calc'd:  $\text{C}_{25}\text{H}_{30}\text{N}_3\text{O}_2$   $[\text{M}+\text{H}]^+$ , 404.2).

**(S)-2-acetamido-3-(2-cinnamyl-1H-indol-3-yl)-N-isopropylpropanamide (22):** *exo*-Pyrroloindoline **21b** (12.7 mg, 31.5  $\mu\text{mol}$ ) was dissolved in  $\text{MeNO}_2$  (5.0 mL) and treated with TFA (1.3 mL). The mixture was stirred at rt for 30 min, then concentrated and dried thoroughly in vacuo. Purification by column chromatography on  $\text{SiO}_2$  eluted with 0→2% MeOH in  $\text{CHCl}_3$  afforded **22** (9.0 mg, 71%) as a light yellow film.  $R_f$  = 0.48, 6% MeOH/ $\text{CHCl}_3$ .  $^1\text{H}$  NMR ( $\text{CDCl}_3$ , 500 MHz, major rotamer):  $\delta$  0.64 (d,  $J$  = 6.6 Hz, 3H), 0.93 (d,  $J$  = 6.5 Hz, 3H), 1.99 (s, 3H), 3.05 (dd,  $J$  = 14.1, 10.0 Hz, 1H), 3.28 (dd,  $J$  = 14.1, 4.8 Hz, 1H), 3.68 (dd,  $J$  = 16.4, 6.5 Hz, 1H), 3.75 (dd,  $J$  = 16.4, 6.6 Hz, 1H), 3.76-3.85 (m, 1H), 4.60 (ddd,  $J$  = 10.0, 7.3, 4.8 Hz, 1H), 5.07 (br d,  $J$  = 7.3 Hz, 1H), 6.32 (ddd,  $J$  = 15.7, 6.8, 6.8 Hz, 1H), 6.47 (br d,  $J$  = 7.3 Hz, 1H), 6.54 (d,  $J$  = 15.7 Hz, 1H), 7.09-7.18 (m, 2H), 7.21-7.34 (m, 4H), 7.34-7.39 (m, 2H), 7.66 (d,  $J$  = 7.4 Hz, 1H), 7.99 (br s, 1H).  $^{13}\text{C}$  NMR ( $\text{CDCl}_3$ , 126 MHz):  $\delta$  170.3, 170.0, 136.9, 135.5, 134.3, 132.5, 128.8, 128.6, 127.8, 126.3, 126.3, 121.9, 120.0, 118.7, 110.7, 107.3, 54.2, 41.6, 29.9, 28.2, 23.4, 22.6, 21.9. MS  $m/z$  404.2 (calc'd:  $\text{C}_{25}\text{H}_{30}\text{N}_3\text{O}_2$   $[\text{M}+\text{H}]^+$ , 404.2).

### D.3. Selective Synthesis of 9d

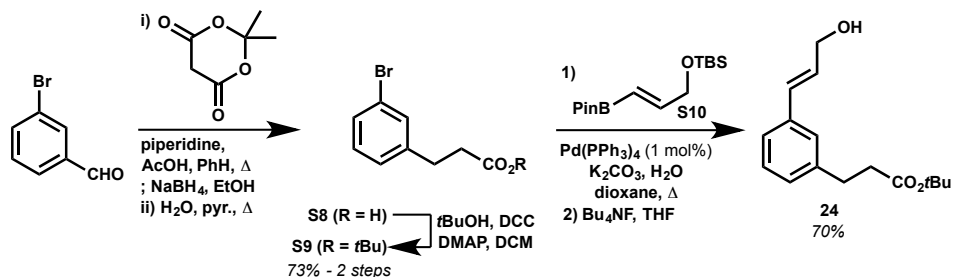

**(3-bromophenyl)propanoic acid *tert*-butyl ester (S8):** 3-Bromobenzaldehyde (4.63 g, 25 mmol), Meldrum's acid (3.60 g, 25 mmol), piperidine (198  $\mu\text{L}$ , 2 mmol), AcOH (429  $\mu\text{L}$ , 7.5 mmol) were dissolved in benzene (50 mL) and heated to reflux on a Dean-Stark apparatus. After 30 min, the reaction was cooled in an ice bath and EtOH (5 mL) was added, followed by the addition of NaBH<sub>4</sub> (945 mg, 25 mmol) in portions. The mixture was stirred for 90 min, quenched by the addition of H<sub>2</sub>O, and concentrated. To the residue was added pyridine (40 mL) and H<sub>2</sub>O (4 mL), and the mixture was heated to reflux for 22 hours. The reaction was cooled, concentrated, diluted with 1M NaOH (75 mL), and washed with Et<sub>2</sub>O (x2). The aqueous phase was acidified to pH <2 by the addition of conc. HCl, and extracted with DCM (x3). The combined extract was washed with brine, dried over Na<sub>2</sub>SO<sub>4</sub> and concentrated to give acid **S8** (5.32 g, 93%) as a yellow crystalline solid, which was used without purification. <sup>1</sup>H NMR (500 MHz, CDCl<sub>3</sub>):  $\delta$  2.68 (t, *J* = 7.7 Hz, 2H), 2.93 (t, *J* = 7.7 Hz, 2H), 7.10-7.21 (m, 2H), 7.31-7.42 (m, 2H), 9.33 (br s, 1H). <sup>13</sup>C NMR (126 MHz, CDCl<sub>3</sub>): 178.8, 142.6, 131.5, 130.2, 129.7, 127.1, 122.7, 35.4, 30.2. MS *m/z* 227.0/229.0 (calc'd: C<sub>9</sub>H<sub>8</sub>BrO<sub>2</sub> [M-H]<sup>-</sup>, 227.0). This material (5.32 g, 23.2 mmol) was dissolved in anhydrous DCM (75 mL) and treated with *t*-BuOH (6.61 mL, 69.6 mmol), DMAP (3.41 g, 27.9 mmol). The mixture was cooled in an ice bath, DCC (5.75 g, 27.9 mmol) was added. The mixture was refluxed overnight, and the resulting suspension was filtered through a pad of SiO<sub>2</sub>, rinsing with DCM. The filtrate was exchanged to THF and treated with a small amount of aqueous AcOH and Norit for 30 min. The volatiles were then removed, and the residue was triturated with 1:1 hexanes:DCM and filtered through a pad of SiO<sub>2</sub>, rinsing with the same. The filtrate was evaporated to give ester **S9** (5.22 g, 79%) as a pale yellow oil. <sup>1</sup>H NMR (500 MHz, CDCl<sub>3</sub>):  $\delta$  1.41 (s, 9H), 2.52 (t, *J* = 7.7 Hz, 2H), 2.87 (t, *J* = 7.7 Hz, 2H), 7.10-7.17 (m, 2H), 7.32 (ddd, *J* = 6.8, 2.1, 2.1 Hz, 1H), 7.34-7.37 (m, 1H). <sup>13</sup>C NMR (126 MHz, CDCl<sub>3</sub>):  $\delta$  172.0, 143.2, 131.6, 130.1, 129.4, 127.2, 122.5, 80.7, 36.9, 30.8, 28.2.

**(*E*)-3-(3-(3-hydroxyprop-1-en-1-yl)phenyl)propanoic acid *tert*-butyl ester (24):** Bromide **S9** (5.22 g, 18.3 mmol), vinyl boronate **S10**<sup>5</sup> (6.55 g, 22.0 mmol), Na<sub>2</sub>CO<sub>3</sub> (5.82 g, 54.9 mmol), and dioxane:H<sub>2</sub>O (5:1, 48 mL) were sparged vigorously with argon for 10 min. The apparatus was opened briefly to introduce Pd(PPh<sub>3</sub>)<sub>4</sub> (212 mg, 0.18 mmol), and sparging was continued for 5 min. The mixture was heated to reflux for 2 days, then cooled, and the volatiles were removed by rotary evaporation. The aqueous remainder was diluted, and extracted with EtOAc (x2). The combined extract was washed with brine, dried over Na<sub>2</sub>SO<sub>4</sub>, concentrated, reconstituted in hexanes:EtOAc (9:1), and filtered through a pad of SiO<sub>2</sub> rinsing with the same. The filtrate was concentrated to give 6.86 g of a red oil. This material was dissolved in THF (55 mL) and treated with Bu<sub>4</sub>NF solution (36 mL, 36 mmol), and stirred for 30 min. The mixture was concentrated and partitioned between H<sub>2</sub>O and EtOAc. The organic phase was washed with H<sub>2</sub>O (x2), brine, dried over Na<sub>2</sub>SO<sub>4</sub> and concentrated. Purification by column chromatography on SiO<sub>2</sub> eluted with 15→30% EtOAc in hexanes afforded **24** (3.37 g, 71%) as a pale yellow oil. *R<sub>f</sub>*: 0.44 (7:3 hexanes : EtOAc). <sup>1</sup>H NMR (400 MHz, CDCl<sub>3</sub>):  $\delta$  1.41 (s, 9H), 2.54 (t, *J* = 7.8 Hz, 2H), 2.90 (t, *J* = 7.8 Hz, 2H), 4.31 (br d, *J* = 5.6 Hz, 2H), 6.35 (dt, *J* = 15.9, 5.6 Hz, 1H), 6.58 (dt, *J* = 15.8, 1.4 Hz, 1H), 7.06-7.11 (m, 1H), 7.20-7.25 (m, 3H). <sup>13</sup>C NMR (126 MHz, CDCl<sub>3</sub>):  $\delta$  172.4, 141.2, 136.9, 131.3, 128.8, 128.6, 127.9, 126.6, 124.5, 80.6, 63.9, 37.2, 31.2, 28.2. MS *m/z* 285.1 (calc'd: C<sub>16</sub>H<sub>22</sub>NaO<sub>3</sub> [M+H]<sup>+</sup>, 285.3).

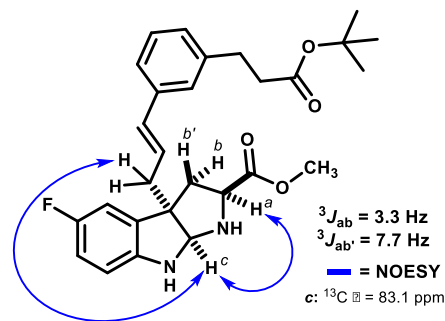

**endo-pyrroloindoline 26:** 5-Fluoro-L-tryptophan methyl ester (59 mg, 0.25 mmol) was freshly freed from its hydrochloride, and was combined with cinnamyl alcohol **24** (72 mg, 0.28 mmol) and Pd(PPh<sub>3</sub>)<sub>4</sub> (14 mg, 0.013 mmol). The vessel was evacuated and backfilled with argon (x3), then DCM (4.2 mL) – previously sparged with argon for 20 min – was added, and the mixture was cooled in an ice bath. Et<sub>3</sub>B solution (300  $\mu\text{L}$ , 1.0 M in hexanes) was added, and the reaction was warmed to and held at 6 °C overnight. The reaction was quenched by addition of 5% aq. K<sub>2</sub>CO<sub>3</sub> (50 mL) and extracted with DCM (x3). The combined extract was dried over K<sub>2</sub>CO<sub>3</sub> and concentrated. Purification by column chromatography on SiO<sub>2</sub> eluted with 75→85% EtOAc in hexanes afforded **26** (96 mg, 80%) as a faintly yellow oil contaminated by ~8 mol% triphenylphosphine oxide. *R<sub>f</sub>*: 0.32 (7:3 hexanes : EtOAc). <sup>1</sup>H NMR (400 MHz, CDCl<sub>3</sub>):  $\delta$  1.40 (s, 9H), 2.39 (dd, *J* = 13.0, 7.9 Hz, 1H), 2.48 (dd, *J* = 13.0, 3.4 Hz, 1H), 2.51 (t, *J* = 8.0 Hz, 2H), 2.53 (dd, *J* = 13.5, 8.0 Hz, 1H), 2.63 (dd, *J* = 13.5, 6.6

Hz, 1H), 2.86 (t, *J* = 7.8 Hz, 2H), 3.38 (s, 1H), 3.89 (br dd, *J* = 7.3, 3.1 Hz, 2H), 4.91 (s, 1H), 6.05 (ddd, *J* = 15.4, 8.0, 7.3 Hz, 1H), 6.39 (br d, *J* = 15.7 Hz, 1H), 6.46 (dd, *J*<sub>HH</sub> = 8.4 Hz, *J*<sub>HF</sub> = 4.2 Hz, 1H), 6.70-6.79 (m, 2H), 7.04 (br d, *J* = 7.6 Hz, 1H), 7.11 (br s, 1H), 7.12 (br d, *J* = 7.8 Hz, 1H), 7.18 (dd, *J* = 7.8, 7.6 Hz, 1H). <sup>13</sup>C NMR (126 MHz, CDCl<sub>3</sub>):  $\delta$  174.2, 172.3, 157.3 (d, *J*<sub>CF</sub> = 236 Hz), 145.6, 141.2, 137.3, 133.7, 132.2 (d, *J*<sub>CF</sub> = 9.9 Hz), 128.7, 127.5, 126.4, 125.2, 124.1, 114.7 (d, *J*<sub>CF</sub> = 23.3 Hz), 111.0 (d, *J*<sub>CF</sub> = 23.8 Hz), 110.2 (d, *J*<sub>CF</sub> = 8.1 Hz), 83.2, 80.5, 59.9, 57.9 (d, *J*<sub>CF</sub> = 1.6 Hz), 52.1, 41.9, 41.2, 37.1, 31.1, 28.2. MS *m/z* 481.2 (calc'd: C<sub>28</sub>H<sub>34</sub>FN<sub>2</sub>O<sub>4</sub> [M+H]<sup>+</sup>, 481.6).

**Intermediate 27:** Pyrroloindoline **26** (581 mg, 1.21 mmol) was dissolved in DMF, and Boc-L-phenylalanine and *i*Pr<sub>2</sub>EtN (505  $\mu$ L, 2.9 mmol) were added. The mixture was cooled to 0  $^{\circ}$ C, treated with HBTU (550 mg, 1.45 mmol), and allowed to warm to rt. After 40 min, the mixture was diluted with 1:1 brine : 5% aq. K<sub>2</sub>CO<sub>3</sub> and extracted with EtOAc (x2). The combined extract was washed with brine, dried over Na<sub>2</sub>SO<sub>4</sub> and concentrated. The residue was dissolved in THF:MeOH:H<sub>2</sub>O (3:1:1, 12 mL) and treated with LiOH·H<sub>2</sub>O (102 mg, 2.42 mmol). The mixture was stirred for 3.5 hrs, then additional LiOH (50 mg, 1.21 mmol) was added. After 2 hrs, additional LiOH (50 mg, 1.21 mmol) was again added. The mixture was stirred for 1.5 hrs, then quenched by the addition of Et<sub>3</sub>N·HCl (830 mg, 6.0 mmol), concentrated, and further dried in vacuo. The resulting residue was dissolved in DMF (12 mL) and treated with *i*Pr<sub>2</sub>EtN (843  $\mu$ L, 4.84 mmol), L-threonine amide (171 mg, 1.45 mmol), and then by HBTU (550 mg, 1.45 mmol). After stirring for 1 hr, additional L-threonine amide (85 mg, 0.72 mmol) and HBTU (225 mg, 0.72 mmol) were added, and stirring continued for 2.5 hrs. The mixture was concentrated to ~4 mL by rotary evaporation, and partitioned between 5% aq. K<sub>2</sub>CO<sub>3</sub> and EtOAc. The aqueous phase was extracted with EtOAc (x1), and the combined organic phase was washed sequentially with H<sub>2</sub>O and brine, dried over Na<sub>2</sub>SO<sub>4</sub> and concentrated. Purification by column

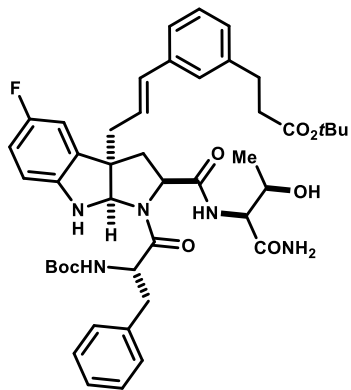

chromatography on SiO<sub>2</sub> eluted with 0→8% MeOH in CHCl<sub>3</sub> afforded **27** (598 mg, 61%) as a white foam. An analytical sample was obtained by preparative HPLC (19x250mm C18, 40;75-100% ACN + 0.1 v% HCO<sub>2</sub>H, 18 mL/min). <sup>1</sup>H NMR (500 MHz, DMSO-d<sub>6</sub>, ~8:4:1 mixture of rotamers, data is of major):  $\delta$  0.66 (d, *J* = 6.1 Hz, 3H), 1.30 (s, 9H), 1.34 (s, 9H), 2.33 (dd, *J* = 13.3, 4.2 Hz, 1H), 2.49 (t, *J* = 7.8 Hz, 2H), 2.48-2.55 (m, 2H), 2.56 (dd, *J* = 13.5, 8.8 Hz, 1H), 2.66 (dd, *J* = 13.8, 6.3 Hz, 1H), 2.77 (t, *J* = 7.3 Hz, 2H), 2.88 (dd, *J* = 14.0, 11.8 Hz, 1H), 3.10 (dd, *J* = 14.0, 1.7 Hz, 1H), 3.79-3.88 (m, 2H), 4.64 (dd, *J* = 9.5, 4.5 Hz, 1H), 4.74 (ddd, *J* = 10.9, 8.1, 2.4 Hz, 1H), 4.88 (br s, 1H), 6.17 (ddd, *J* = 15.7, 7.9, 7.9 Hz, 1H), 6.22 (d, *J* = 3.8 Hz, 1H), 6.47 (d, *J* = 15.7 Hz, 1H), 6.60 (dd, *J*<sub>HH</sub> = 8.2, *J*<sub>HF</sub> = 4.4 Hz, 1H), 6.70-6.74 (m, 1H), 6.76 (br s, 1H), 6.78 (br dd, *J* = 8.8, 8.8 Hz, 1H), 7.03-7.09 (m, 2H), 7.11-7.27 (m, 5H), 7.26-7.36 (m, 2H), 7.44 (d, *J* = 7.9 Hz, 1H), 7.48 (apt d, *J* = 7.5 Hz, 2H). <sup>13</sup>C NMR (126 MHz, DMSO-d<sub>6</sub>, major rotamer):  $\delta$  173.5, 171.8, 171.5, 170.5, 156.7 (d, *J*<sub>CF</sub> = 233 Hz), 155.8, 144.9, 137.9, 136.9, 135.9, 133.6, 129.9, 128.43, 128.40 (d, *J*<sub>CF</sub> = 20.0 Hz), 127.9, 127.2, 126.5, 126.2, 124.9, 123.6, 114.3 (d, *J*<sub>CF</sub> = 23.2 Hz), 111.7 (d, *J*<sub>CF</sub> = 8.0 Hz), 110.3 (d, *J*<sub>CF</sub> = 24.0 Hz), 82.0, 79.7, 78.3, 65.5, 60.6, 57.98, 57.97, 57.5, 52.8, 36.2, 30.4, 28.1, 27.73, 27.70 (2), 19.5. <sup>19</sup>F NMR (282 MHz, DMSO-d<sub>6</sub>, trifluoroacetate salt, mixture of rotamers):  $\delta$  -73.5, -125.1 (major), -127.0 (minor). MS *m/z* 814.4 (calc'd: C<sub>45</sub>H<sub>57</sub>FN<sub>5</sub>O<sub>8</sub> [M+H]<sup>+</sup>, 814.4).

**Cyclization of 27 to lactam 9d:** Intermediate **27** (570 mg, 0.70 mmol) was dissolved in anhydrous DCM (7 mL) and cooled in an ice bath. Pre-cooled TFA (7 mL) was added, and the initially colorless mixture was stirred for 3.5 hours over which it turned dark pink. The mixture was then concentrated by rotary evaporation (bath 30  $^{\circ}$ C) and further dried *in vacuo*. The resulting faintly brown residue was dissolved in DMF (10 mL) and rendered basic by the addition of *i*Pr<sub>2</sub>EtN (1.5 mL). This solution was added via syringe pump to a stirred solution of HBTU (1.33 g, 3.5 mmol) in DMF (130 mL) over a period of 1 hr. Stirring was continued for 20 min, and the mixture was then concentrated to ~5 mL by rotary evaporation and partitioned between 5% K<sub>2</sub>CO<sub>3</sub> (aq.) and EtOAc. The aqueous phase was extracted with ethyl acetate (x2) and the combined organic phase was washed with H<sub>2</sub>O (x1), brine, dried over Na<sub>2</sub>SO<sub>4</sub> and concentrated. The resulting residue was triturated with warm MeOH and filtered to give, 169 mg of a white solid. The remaining solution was purified by column chromatography on SiO<sub>2</sub> eluted with 0→10% MeOH in CHCl<sub>3</sub> to give additional 112 mg. Macrocycle **9d** (combined 281 mg, 63% from **27**) obtained in this manner was spectroscopically identical to material isolated previously from acid-promoted cyclization of **7**.

#### D.4. Reaction of trifunctional template **27** with Trp-Trp-Tyr

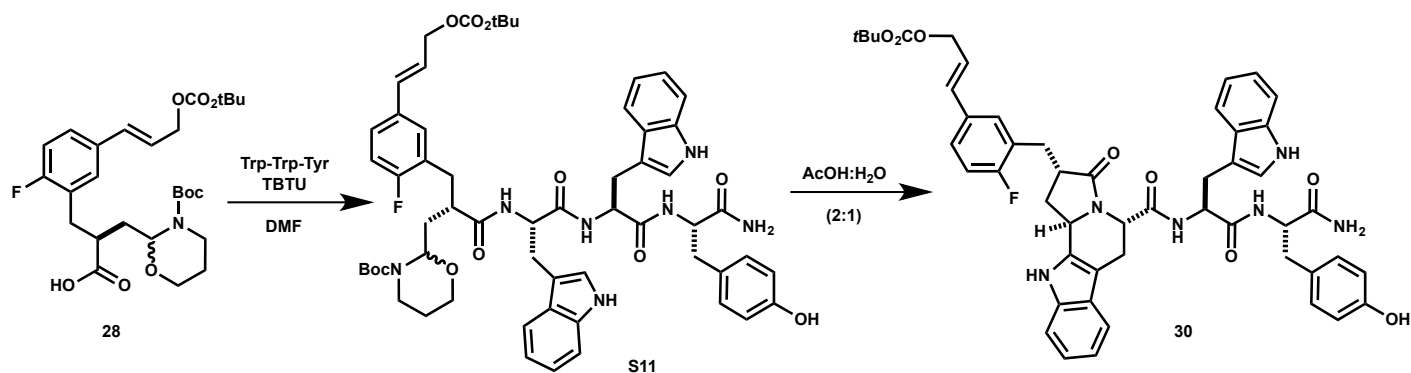

**Acyclic cinnamyl carbonate (S11).** Compound **S11** was prepared according to General Procedure A. The reaction was worked up by partitioning between sat. NaHCO<sub>3</sub> and EtOAc. The organic phase was then washed with sat. NaHCO<sub>3</sub>, 1N HCl, H<sub>2</sub>O, brine, dried over Na<sub>2</sub>SO<sub>4</sub> and concentrated. Purification was accomplished by column chromatography on SiO<sub>2</sub> eluted with 0→10% MeOH in CHCl<sub>3</sub> afforded **S11** as a colorless film. A yield was not recorded. <sup>1</sup>H NMR (CD<sub>3</sub>OD, 500 MHz, ~1:1 mixture of diastereomers): δ 1.28 (s, 9H), 1.37 (s, 9H), 1.44 (s, 9H), 1.45 (s, 9H), 1.53-1.69 (m, 2H), 1.92-2.00 (m, 1H), 2.06 (ddd, *J* = 14.0, 8.1, 5.8 Hz, 1H), 2.33-2.45 (m, 2H), 2.46-2.54 (m, 1H), 2.53-2.62 (m, 2H), 2.62-2.74 (m, 3H), 2.74-3.12 (m, 16H), 3.37-3.49 (m, 2H), 3.54-3.66 (m, 2H), 3.73-3.84 (m, 2H), 4.40 (dd, *J* = 7.8, 6.2 Hz, 1H), 4.44-4.52 (m, 3H), 4.52-4.58 (m, 2H), 4.55 (br d, *J* = 6.3 Hz, 2H), 4.60 (br d, *J* = 6.3 Hz, 2H), 5.30-5.39 (m, 1H), 5.45 (dd, *J* = 8.1, 6.4 Hz, 1H), 6.13 (dt, *J* = 15.9, 6.2 Hz, 1H), 6.17 (dt, *J* = 15.9, 6.2 Hz, 1H), 6.44 (br d, *J* = 15.9 Hz, 1H), 6.50 (br d, *J* = 15.9 Hz, 1H), 6.65 (d, *J* = 8.5 Hz, 2H), 6.70 (d, *J* = 8.4 Hz, 2H), 6.74-6.77 (m, 2H), 6.83 (s, 1H), 6.86-6.93 (m, 4H), 6.93-7.03 (m, 7H), 7.04-7.15 (m, 6H), 7.15-7.22 (m, 2H), 7.29 (apt t, *J* = 7.7 Hz, 1H), 7.32 (apt t, *J* = 7.8 Hz, 1H), 7.40-7.46 (m, 3H), 7.48 (d, *J* = 7.9 Hz, 1H). <sup>13</sup>C NMR (CD<sub>3</sub>OD, 126 MHz, ~1:1 mixture of diastereomers): δ 177.0, 176.9, 176.5, 176.4, 176.0, 175.9, 174.38, 174.36, 174.05, 174.03, 173.4, 173.3, 163.1, 161.2, 157.2, 155.5, 154.93, 154.92, 137.92, 137.91, 137.89, 137.84, 134.03, 134.00, 133.90, 133.87, 133.75, 133.71, 131.34, 131.26, 130.8, 130.73, 130.69, 129.1, 129.0, 128.7, 128.6, 128.5, 128.0, 127.9, 127.84, 127.78, 127.3, 127.2, 124.5, 124.3, 124.1, 122.6, 122.54, 122.52, 120.0, 119.93, 119.90, 119.44, 119.38, 119.31, 119.28, 116.6, 116.5, 116.4, 116.3, 116.2, 112.4, 112.3, 110.7, 110.64, 110.57, 110.51, 83.0, 82.9, 81.7, 81.6, 68.29, 68.27, 61.0, 60.6, 56.2, 56.1, 56.0, 55.9, 55.3, 55.2, 46.0, 44.4, 44.3, 38.6, 38.4, 37.6, 32.8, 32.6, 32.1, 31.8, 30.7, 28.7, 28.61, 28.55, 28.4, 28.3, 28.2, 28.0, 26.2, 26.0. MS *m/z* 958.3 (calc'd: C<sub>53</sub>H<sub>61</sub>FN<sub>7</sub>O<sub>9</sub>, [M-Boc+2H]<sup>+</sup>, 958.8); 940.5 (calc'd: C<sub>53</sub>H<sub>59</sub>FN<sub>7</sub>O<sub>8</sub>, [M-OCO<sub>2</sub>tBu+2H]<sup>+</sup>, 940.4).

**Pyrolo tetrahydro-β-carboline (30).** Intermediate **S11** (147 mg, 138 μmol) was dissolved in AcOH:H<sub>2</sub>O (2:1, 15.7 mL) and stirred at rt for 4 hr. The mixture was concentrated to give **30** (106 mg, 88%) as a colorless film. An analytical sample was obtained by preparative HPLC purification. <sup>1</sup>H NMR (DMSO-*d*<sub>6</sub>, 500 MHz): δ 1.43 (s, 9H), 1.90-2.00 (m, 2H), 2.56-2.64 (m, 2H), 2.69 (dd, *J* = 13.9, 7.9 Hz, 1H), 2.79-2.88 (m, 2H), 2.99 (dd, *J* = 14.6, 9.5 Hz, 1H), 3.05-3.13 (m, 2H), 3.20 (d, *J* = 15.6 Hz, 1H), 6.37 (dt, *J* = 15.9, 6.2 Hz, 1H), 6.65 (d, *J* = 8.5 Hz, 2H), 6.67 (br d, *J* = 16.0 Hz, 1H), 6.92-6.98 (m, 1H), 6.98 (d, *J* = 8.5 Hz, 2H), 6.99-7.03 (m, 1H), 7.03-7.06 (m, 2H), 7.12 (d, *J* = 2.0 Hz, 1H), 7.16 (dd, *J*<sub>HF</sub> = 9.7, *J*<sub>HH</sub> = 8.3 Hz, 1H), 7.21 (br d, *J* = 8.1 Hz, 1H), 7.29 (br s, 1H), 7.33 (d, *J* = 8.1 Hz, 1H), 7.36 (br d, *J* = 7.8 Hz, 1H), 7.40 (ddd, *J*<sub>HH</sub> = 8.3, 2.0 Hz, *J*<sub>HF</sub> = 5.0 Hz, 1H), 7.47 (dd, *J*<sub>HF</sub> = 7.3 Hz, *J*<sub>HH</sub> = 2.0 Hz, 1H), 7.59 (d, *J* = 7.9 Hz, 1H), 7.92 (d, *J* = 8.0 Hz, 1H), 8.15 (d, *J* = 7.8 Hz, 1H), 9.19 (br s, 1H), 10.78 (s, 1H), 10.81 (d, *J* = 1.6 Hz, 1H). MS *m/z* 765.3 (calc'd: C<sub>45</sub>H<sub>42</sub>FN<sub>6</sub>O<sub>5</sub>, [M-Boc+2H]<sup>+</sup>, 765.3).

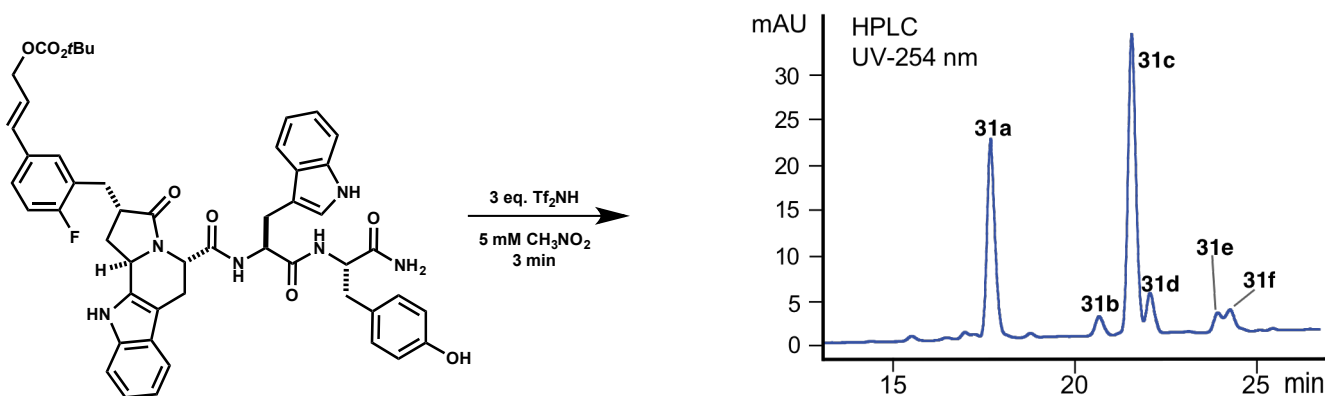

**31d:** This peak contained two isomeric products that were not identified

MS *m/z* 765.3 (calc'd: C<sub>45</sub>H<sub>42</sub>FN<sub>6</sub>O<sub>5</sub>, [M+H]<sup>+</sup>, 765.3).

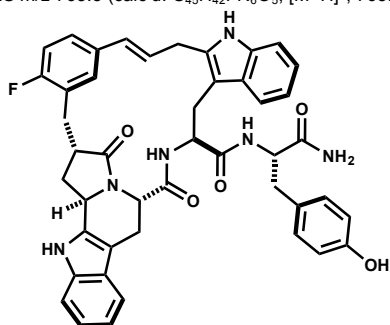

**31a**

MS *m/z* 765.3 (calc'd: C<sub>45</sub>H<sub>42</sub>FN<sub>6</sub>O<sub>5</sub>, [M+H]<sup>+</sup>, 765.3).

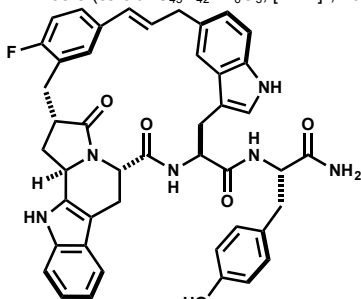

**31c**

MS *m/z* 765.3 (calc'd: C<sub>45</sub>H<sub>42</sub>FN<sub>6</sub>O<sub>5</sub>, [M+H]<sup>+</sup>, 765.3).

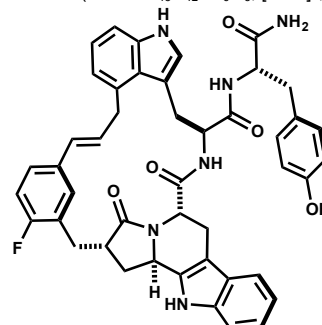

**31b**

MS *m/z* 765.3 (calc'd: C<sub>45</sub>H<sub>42</sub>FN<sub>6</sub>O<sub>5</sub>, [M+H]<sup>+</sup>, 765.3).

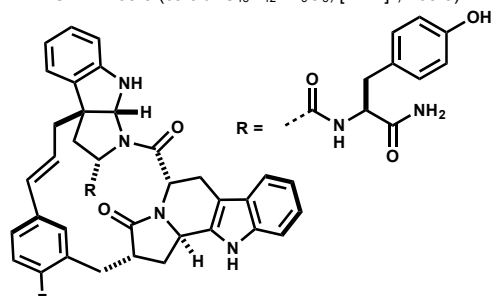

**31e**

MS *m/z* 765.3 (calc'd: C<sub>45</sub>H<sub>42</sub>FN<sub>6</sub>O<sub>5</sub>, [M+H]<sup>+</sup>, 765.3).

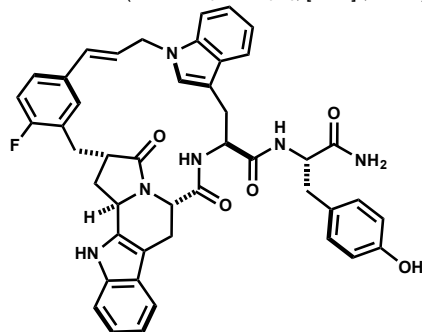

**31f**

**Analytical HPLC method:**

Column: Waters XBridge™

C18, 4.6x250mm, 5µm.

Solvent A: H<sub>2</sub>O + 0.1%v

TFA

Solvent B: ACN + 0.1%v

TFA

Flow rate: 1.00 ml/min

| Time | %B |
|------|----|
| 0    | 42 |
| 2    | 42 |
| 25   | 60 |
| 26   | 42 |
| 31   | 42 |

**Semi-preparative HPLC**

method A:

Column: Waters XBridge™

C18, 10x250mm, 5µm.

Solvent A: H<sub>2</sub>O + 0.1%v

TFA

Solvent B: ACN + 0.1%v

TFA

Flow rate: 7.00 ml/min

| Time | %B  |
|------|-----|
| 0    | 42  |
| 2    | 42  |
| 16   | 50  |
| 16.2 | 100 |
| 19   | 100 |
| 19.5 | 42  |

**Semi-preparative HPLC**

method B:

Column: Waters XSelect™

C18, 10x250mm, 5µm.

Solvent A: H<sub>2</sub>O + 0.1%v TFA

Solvent B: ACN + 0.1%v TFA

Flow rate: 6.00 ml/min

For re-purification of 31e

| Time | %B |
|------|----|
| 0    | 43 |
| 1    | 43 |
| 31   | 54 |



Macrocyclic Product 31a

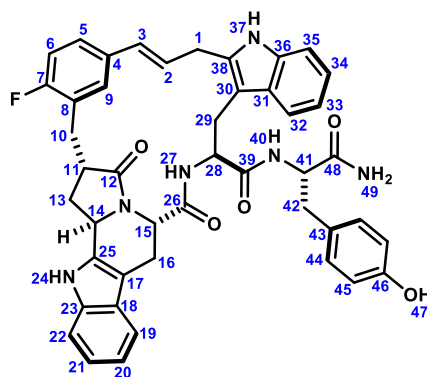

(500 MHz, DMSO-*d*<sub>6</sub>, 298K)

|    | 13C                          | 1H                                                                                   | key correlation             |
|----|------------------------------|--------------------------------------------------------------------------------------|-----------------------------|
| 1  | 291                          | 3.57 (dd, <i>J</i> = 16.8, 5.6 Hz, 1H), 3.67 (dd, <i>J</i> = 16.8, 5.1 Hz, 1H)       | HMBC 1→2,3,30,38            |
| 2  | 126.7                        | 6.24 (ddd, <i>J</i> = 15.8, 5.6, 5.1 Hz, 1H)                                         | TOCSY 2→1,3 HMBC 2→4        |
| 3  | 128.9                        | 5.87 (d, <i>J</i> = 15.8 Hz, 1H)                                                     |                             |
| 4  | 133.3                        | -                                                                                    |                             |
| 5  | 124.6                        | 7.34-7.37 (m, 1H) overlap                                                            | HMBC 5→7 TOCSY 5→7,9        |
| 6  | 114.6                        | 7.09 (dd, <i>J</i> <sub>HF</sub> = 9.9 Hz, <i>J</i> <sub>HH</sub> = 1.8 Hz, 1H)      | HMBC 6→4,7                  |
| 7  | 159.4 (d, <i>J</i> ≈ 240 Hz) | -                                                                                    |                             |
| 8  | 123.4                        | -                                                                                    |                             |
| 9  | 129.9                        | 6.69 (dd, <i>J</i> <sub>HF</sub> = 7.4 Hz, <i>J</i> <sub>HH</sub> = 1.8 Hz, 1H)      | HMBC 9→5,7                  |
| 10 | 27.6                         | 2.76-2.82 (m, 1H) overlap, 3.00 (dd, <i>J</i> = 13.5, 5.2 Hz, 1H)                    | HMBC 10→8,11,12             |
| 11 | 42.2                         | 2.78-2.84 (m, 1H) overlap                                                            |                             |
| 12 | 173.3                        | -                                                                                    |                             |
| 13 | 29.2                         | 1.95 (ddd, <i>J</i> = 12.7, 9.5, 9.5 Hz, 1H), 2.26 (dd, <i>J</i> = 12.7, 8.0 Hz, 1H) | HMBC 13→10,11,12 COSY 13→14 |
| 14 | 51.2                         | 4.32 (dd, <i>J</i> = 9.5, 8.0 Hz, 1H)                                                | HMBC 14→25                  |
| 15 | 47.3                         | 4.97 (d, <i>J</i> = 8.3 Hz, 1H)                                                      | HMBC 15→14,16,26 COSY 15→16 |
| 16 | 23.6                         | 2.78-2.84 (m, 1H) overlap, 2.94 (d, <i>J</i> = 16.8 Hz, 1H) overlap                  | HMBC 16→15,17,25,26         |
| 17 | 102.9                        | -                                                                                    |                             |
| 18 | 126.2                        | -                                                                                    |                             |
| 19 | 117.8                        | 7.33-7.36 (m, 1H) overlap                                                            |                             |
| 20 | 118.2                        | 6.88-6.92 (m, 1H) overlap                                                            | HMBC 20→18                  |
| 21 | 120.2                        | 6.95 (ddd, <i>J</i> = 7.9, 7.1, 1.0 Hz, 1H)                                          | HMBC 21→19                  |
| 22 | 110.4                        | 7.17 (br d, <i>J</i> = 7.9 Hz, 1H)                                                   | HMBC 22→18                  |
| 23 | 135.6                        | -                                                                                    |                             |
| 24 | -                            | 10.81 (s, 1H)                                                                        | HMBC 24→17,18,23,25         |
| 25 | 133.7                        | -                                                                                    |                             |
| 26 | 169.9                        | -                                                                                    |                             |
| 27 | -                            | 8.33 (d, <i>J</i> = 7.8 Hz, 1H)                                                      |                             |
| 28 | 54.7                         | 4.19 (ddd, <i>J</i> = 7.8, 7.8, 7.8 Hz, 1H)                                          | HMBC 28→29,39 COSY 28→27    |
| 29 | 25.6                         | 2.93-2.97 (m, 2H) overlap                                                            | HMBC 29→28,30,31,38         |
| 30 | 106.4                        | -                                                                                    |                             |
| 31 | 128.8                        | -                                                                                    |                             |
| 32 | 117.9                        | 7.51 (d, <i>J</i> = 7.9 Hz, 1H)                                                      | HMBC 32→36                  |
| 33 | 120.2                        | 6.99 (ddd, <i>J</i> = 7.9, 7.0, 0.9 Hz, 1H)                                          |                             |
| 34 | 117.9                        | 7.03 (ddd, <i>J</i> = 8.0, 7.0, 1.1 Hz, 1H)                                          | HMBC 34→36                  |
| 35 | 110.2                        | 7.27 (d, <i>J</i> = 8.0 Hz, 1H)                                                      |                             |
| 36 | 134.8                        | -                                                                                    |                             |
| 37 | -                            | 10.89 (s, 1H)                                                                        | HMBC 37→30                  |
| 38 | 133.4                        | -                                                                                    |                             |
| 39 | 171.3                        | -                                                                                    |                             |
| 40 | -                            | 7.33-7.36 (m, 1H) overlap                                                            | HMBC 40→39                  |
| 41 | 52.7                         | 4.23 (ddd, <i>J</i> = 7.7, 6.2, 6.2 Hz, 1H)                                          | HMBC 41→43 COSY 41→40       |
| 42 | 36.9                         | 2.69 (dd, <i>J</i> = 13.4, 6.2 Hz, 1H), 2.77-2.81 (m, 1H) overlap                    | HMBC 42→43                  |
| 43 | 126.7                        | -                                                                                    |                             |
| 44 | 130.2                        | 6.90 (d, <i>J</i> = 8.3 Hz, 2H)                                                      |                             |
| 45 | 114.5                        | 6.61 (d, <i>J</i> = 8.3 Hz, 2H)                                                      | HMBC 45→43,46               |
| 46 | 155.7                        | -                                                                                    |                             |
| 47 | -                            | 9.14 (br s, 1H)                                                                      |                             |
| 48 | 171.8                        | -                                                                                    |                             |
| 49 | -                            | 6.89 (br s, 1H) overlap, 7.29 (br s, 1H)                                             | HMBC 49→48 TOCSY 49→49      |

Macrocyclic Product **31b**

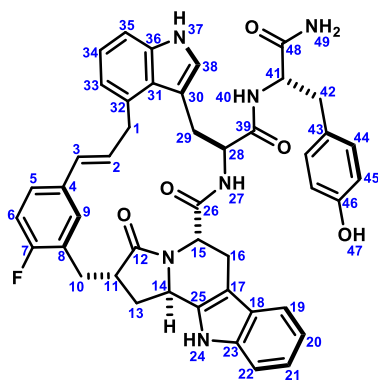

(500 MHz, DMSO-*d*<sub>6</sub>, 298K)

|    | <b>13C</b>            | <b>1H</b>                                                         | <b>key correlation</b>                       |
|----|-----------------------|-------------------------------------------------------------------|----------------------------------------------|
| 1  | 37                    | 3.59-3.68 (m, 1H), 3.85-3.95 (m, 1H)                              |                                              |
| 2  | 130.5                 | 6.30 (ddd, J = 15.8, 6.2, 4.9 Hz, 1H)                             | COSY 2→1,1' HMBC 2→4                         |
| 3  | 128.5                 | 5.98 (br d, J = 15.8 Hz, 1H)                                      |                                              |
| 4  | 133.3                 | -                                                                 |                                              |
| 5  | 125.4                 | 7.13-7.18 (m, 1H)                                                 | HMBC 5→9                                     |
| 6  | 114.7                 | 7.02-7.07 (m, 1H)                                                 | HMBC 6→4                                     |
| 7  | 159.7 (d, J ≈ 250 Hz) | -                                                                 |                                              |
| 8  | 124.1                 | -                                                                 |                                              |
| 9  | 129.5                 | 6.99-7.03 (m, 1H)                                                 | HMBC 10→8,9,12                               |
| 10 | 28.3                  | 2.86-2.92 (m, 1H) overlap, 3.01-3.08 (m, 1H)                      | HMBC 11→12                                   |
| 11 | 42.2                  | 2.87-2.94 (m, 1H) overlap                                         |                                              |
| 12 | 173.2                 | -                                                                 |                                              |
| 13 | 29.3                  | 2.00 (ddd, J = 11.6, 10.1, 9.9 Hz, 1H), 2.32-2.40 (m, 1H)         | COSY 13→11 TOCSY 13→10,10',11,13' HMBC 13→12 |
| 14 | 51.2                  | 4.57 (apt t, J = 8.3 Hz, 1H)                                      | HMBC 14→17 COSY 14→13                        |
| 15 | 48.1                  | 5.22 (d, J = 7.9 Hz, 1H)                                          | HMBC 15→12,17,26                             |
| 16 | 24.7                  | 2.80-2.86 (m, 1H) overlap, 2.94 (br dd, J = 16.2, 8.1 Hz, 1H)     |                                              |
| 17 | 103.1                 | -                                                                 |                                              |
| 18 | 126.3                 | -                                                                 |                                              |
| 19 | 110.9                 | 7.21 (d, J = 8.1 Hz, 1H)                                          | HMBC 19→18                                   |
| 20 | 120.7                 | -                                                                 |                                              |
| 21 | 118.2                 | 6.97-7.01 (m, 1H)                                                 | TOCSY 21→19,20,22                            |
| 22 | 117.7                 | 7.34 (d, J = 7.8 Hz, 1H)                                          | HMBC 22→17,18,20 COSY 22→21                  |
| 23 | 135.6                 | -                                                                 |                                              |
| 24 | -                     | 10.89 (s, 1H)                                                     | HMBC 24→17,18,23,25                          |
| 25 | 134.2                 | -                                                                 |                                              |
| 26 | 170.1                 | -                                                                 |                                              |
| 27 | -                     | 8.56 (br d, J = 5.0 Hz, 1H)                                       |                                              |
| 28 | 52.7                  | 4.31-4.37 (m, 1H)                                                 | HMBC 28→39 TOCSY 28→27,29                    |
| 29 | 28.9                  | 3.14 (dd, J = 15.5, 2.4 Hz, 1H), 3.32 (dd, J = 15.5, 10.3 Hz, 1H) |                                              |
| 30 | 111.1                 | -                                                                 |                                              |
| 31 | 125.8                 | -                                                                 |                                              |
| 32 | 131.2                 | -                                                                 |                                              |
| 33 | 120.5                 | 6.77 (d, J = 7.1 Hz, 1H)                                          | HMBC 33→1 COSY 33→34                         |
| 34 | 121                   | 6.93-6.97 (m,1H) overlap                                          | HMBC 34→32,36                                |
| 35 | 110                   | 7.19 (d, J = 8.2 Hz, 1H)                                          | COSY 35→34                                   |
| 36 | 136.6                 | -                                                                 |                                              |
| 37 | -                     | 10.81 (br d, J = 1.8 Hz, 1H)                                      | HMBC 37→30,31,36,38                          |
| 38 | 122                   | 7.00-7.21 (m, 1H)                                                 | HMBC 38→30,36                                |
| 39 | 170.3                 | -                                                                 |                                              |
| 40 | -                     | 8.35 (br s, 1H)                                                   |                                              |
| 41 | 53.1                  | 4.42 (ddd, J = 8.7, 7.9, 4.7 Hz, 1H)                              | HMBC 41→39,43,48                             |
| 42 | 36.1                  | 2.74 (dd, J = 14.4, 8.7 Hz, 1H), 2.84 (dd, J = 14.4, 4.7 Hz, 1H)  | TOCSY 42→40,41 HMBC 42→39,43,48              |
| 43 | 127.8                 | -                                                                 |                                              |
| 44 | 129.8                 | 7.01 (d, J = 8.3 Hz, 2H)                                          | HMBC 44→46                                   |
| 45 | 115                   | 6.73 (d, J = 8.3 Hz, 2H)                                          | HMBC 45→43,46                                |
| 46 | 155.8                 | -                                                                 |                                              |
| 47 | -                     | 9.28 (br s, 1H)                                                   | HMBC 47→46                                   |
| 48 | 172.8                 | -                                                                 |                                              |
| 49 | -                     | 6.88 (br s, 1H), 7.31 (br s, 1H)                                  | HMBC 49→48                                   |

Macrocyclic Product **31c**

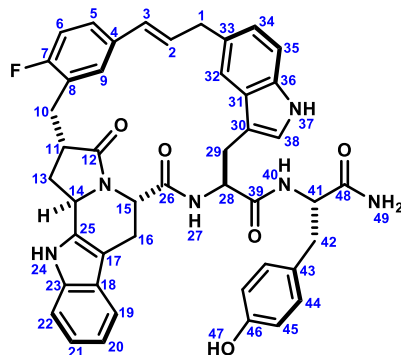

(500 MHz, DMSO-*d*<sub>6</sub>, 298K)

|    | <b>13C</b>          | <b>1H</b>                                                                    | <b>key correlation</b>         |
|----|---------------------|------------------------------------------------------------------------------|--------------------------------|
| 1  | 37.5                | 3.54 (br dd, J = 16.6, 6.7 Hz, 1H), 3.60 (br dd, J = 16.6, 5.4 Hz, 1H)       | HMBC 1→2,3,33,34               |
| 2  | 129.6               | 6.36 (ddd, J = 15.8, 6.7, 5.4 Hz, 1H)                                        | HMBC 2→4,33 TOCSY 2→1,3        |
| 3  | 129.3               | 6.11 (br d, J = 15.8 Hz, 1H)                                                 |                                |
| 4  | 133.6               | -                                                                            |                                |
| 5  | 125.5               | 7.30 (ddd, JHH = 8.4, 2.0 Hz, JHF = 5.1 Hz, 1H)                              | TOCSY 5→6,9 HMBC 5→9           |
| 6  | 114.6               | 7.12 (dd, JHF = 10.0, JHH = 8.4 Hz, 1H)                                      | HMBC 6→4,8                     |
| 7  | 159.9 (d, J≈240 Hz) | -                                                                            |                                |
| 8  | 124.5               | -                                                                            |                                |
| 9  | 128.8               | 7.00-7.03 (m, 1H) overlap                                                    | HMBC 9→3,5                     |
| 10 | 28.4                | 2.92-3.00 (m, 1H) overlap                                                    | HMBC 10→8,11,12,13             |
| 11 | 41.3                | 2.81-2.87 (m, 1H)                                                            | COSY 11→13,13'                 |
| 12 | 173.7               | -                                                                            |                                |
| 13 | 29.7                | 2.06 (ddd, J = 12.5, 9.0, 9.0 Hz, 1H), 2.29 (ddd, J = 12.5, 7.5, 2.6 Hz, 1H) |                                |
| 14 | 50.7                | 4.97 (dd, J = 9.0, 7.5 Hz, 1H)                                               | HMBC 14→25                     |
| 15 | 48.2                | 5.00 (d, J = 8.2 Hz, 1H)                                                     | HMBC 15→12,14,26               |
| 16 | 24.2                | 2.93-2.98 (m, 1H) overlap, 3.05 (br d, J = 14.8 Hz, 1H)                      | HMBC 16→17,25                  |
| 17 | 103.1               | -                                                                            |                                |
| 18 | 126.2               | -                                                                            |                                |
| 19 | 117.4               | 7.34 (d, J = 7.7 Hz, 1H)                                                     | HMBC 19→23                     |
| 20 | 118.2               | 6.91-6.95 (m, 1H) overlap                                                    |                                |
| 21 | 120.4               | 6.97-7.00 (m, 1H) overlap                                                    | HMBC 21→23 COSY 21→22          |
| 22 | 110.6               | 7.22 (d, J = 8.0 Hz, 1H)                                                     | HMBC 22→20                     |
| 23 | 135.8               | -                                                                            |                                |
| 24 | -                   | 10.93 (s, 1H)                                                                | HMBC 24→17,18,23,25            |
| 25 | 133.5               | -                                                                            |                                |
| 26 | 170.5               | -                                                                            |                                |
| 27 | -                   | 8.28 (d, J = 8.1 Hz, 1H)                                                     | HMBC 27→26                     |
| 28 | 52.3                | 4.62 (ddd, J = 8.1, 7.1, 7.1 Hz, 1H)                                         | HMBC 28→26,29,39               |
| 29 | 27.9                | 2.88 (dd, J = 14.6, 6.8 Hz, 1H), 3.08 (dd, J = 14.6, 7.3 Hz, 1H)             | HMBC 29→30                     |
| 30 | 109                 | -                                                                            |                                |
| 31 | 127.2               | -                                                                            |                                |
| 32 | 117.4               | 7.37 (br s, 1H)                                                              | TOCSY 32→34,35 HMBC 32→34      |
| 33 | 128.9               | -                                                                            |                                |
| 34 | 122.2               | 6.92-6.95 (m, 1H) overlap                                                    | HMBC 34→36                     |
| 35 | 111                 | 7.27 (d, J = 8.2 Hz, 1H)                                                     | HMBC 35→33                     |
| 36 | 134.9               | -                                                                            |                                |
| 37 | -                   | 10.74 (br d, J = 1.6 Hz, 1H)                                                 | HMBC 37→30,31,36,38            |
| 38 | 123.9               | 6.98-7.00 (m, 1H) overlap                                                    | HMBC 38→36                     |
| 39 | 170.8               | -                                                                            |                                |
| 40 | -                   | 7.50 (br d, J = 7.6 Hz, 1H)                                                  | HMBC 40→39                     |
| 41 | 53.3                | 4.17 (ddd, J = 7.6, 6.8, 6.8 Hz, 1H)                                         | COSY 41→42 HMBC 41→39,42,43,48 |
| 42 | 36.3                | 2.46-2.56 (m, 2H) overlap                                                    | HMBC 42→41,43,48               |
| 43 | 127.1               | -                                                                            |                                |
| 44 | 129.8               | 6.77 (d, J = 8.5 Hz, 2H)                                                     | HMBC 44→46                     |
| 45 | 114.5               | 6.56 (d, J = 8.5 Hz, 2H)                                                     |                                |
| 46 | 155.6               | -                                                                            |                                |
| 47 | -                   | 9.12 (br s, 1H)                                                              |                                |
| 48 | 172.2               | -                                                                            |                                |
| 49 | -                   | 6.83 (br s, 1H), 7.17 (br s, 1H)                                             | HMBC 49→48 TOCSY 49→49'        |

Macrocyclic Product **31e**
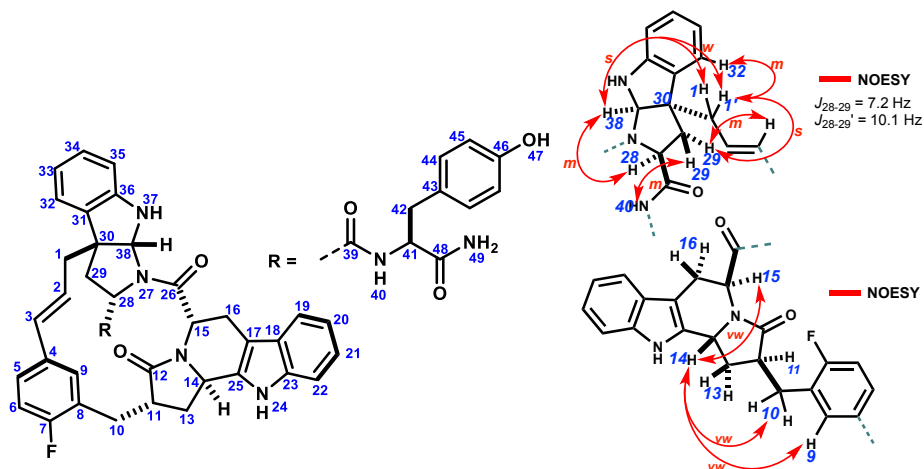
 (500 MHz, DMSO-*d*<sub>6</sub>, 298K)

|    | <b>13C</b>            | <b>1H</b>                                                         | <b>key correlation</b>                 |
|----|-----------------------|-------------------------------------------------------------------|----------------------------------------|
| 1  | 38.8                  | 2.57-2.62 (m, 1H), 2.86 (dd, J = 12.5, 10.4 Hz, 1H)               | HMBC 1→30,38 ROESY 1'→29',32,38; 1→38  |
| 2  | 126.9                 | 6.08-6.16 (m, 1H) overlap                                         | HMBC 2→4,5,9                           |
| 3  | 130                   | 6.59 (d, J = 15.8 Hz, 1H)                                         | TOCSY 3→1,2 HMBC 3→4 ROESY 3→29'       |
| 4  | 133.6                 | -                                                                 |                                        |
| 5  | 126.6                 | 7.06-7.10 (m, 1H) overlap                                         | HMBC 5→2                               |
| 6  | 114.6                 | 7.04-7.10 (m, 1H) overlap                                         | HMBC 6→4,8                             |
| 7  | 159.7 (d, J ≈ 250 Hz) | -                                                                 |                                        |
| 8  | 130                   | -                                                                 |                                        |
| 9  | 128                   | 7.45 (d, 4JHF = 7.2 Hz, 1H)                                       | HMBC 9→4,8                             |
| 10 | 28.7                  | 2.93-2.99 (m, 1H) overlap, 3.02-3.08 (m, 1H) overlap              | HMBC 10→11,12 TOCSY 10→11,13,13',14    |
| 11 | 43.2                  | 3.00-3.06 (m, 1H) overlap                                         |                                        |
| 12 | 173.6                 | -                                                                 |                                        |
| 13 | 29.2                  | 2.13-2.21 (m, 1H), 2.27-2.34 (m, 1H)                              | HMBC 13'→12                            |
| 14 | 51.3                  | 4.42 (dd, J = 8.0, 8.0 Hz, 1H)                                    | HMBC 14→13,17,25 ROESY 14→9,10         |
| 15 | 45                    | 5.66 (d, J = 7.4Hz, 1H)                                           | HMBC 15→12,14,16,26                    |
| 16 | 23.6                  | 2.93-3.05 (m, 2H) overlap                                         | HMBC 16→15,26 TOCSY 16→15,16'          |
| 17 | 103.2                 | -                                                                 |                                        |
| 18 | 126.6                 | -                                                                 |                                        |
| 19 | 118.1                 | 7.38 (d, J = 7.6 Hz, 1H)                                          | HMBC 19→23                             |
| 20 | 118.5                 | 6.95 (dd, J = 7.6, 7.0 Hz, 1H)                                    | HMBC 20→18,22 COSY 20→19               |
| 21 | 120.6                 | 6.99 (dd, J = 7.7, 7.0 Hz, 1H)                                    | HMBC 21→19,23                          |
| 22 | 110.7                 | 7.22 (d, J = 7.7 Hz, 1H)                                          | COSY 22→21 HMBC 22→17,18               |
| 23 | 135.7                 | -                                                                 |                                        |
| 24 | -                     | 10.88 (s, 1H)                                                     | ROESY 24→22,14 HMBC 24→17,23,25        |
| 25 | 134.1                 | -                                                                 |                                        |
| 26 | 169                   | -                                                                 |                                        |
| 27 | -                     | -                                                                 |                                        |
| 28 | 61.8                  | 4.10 (dd, J = 10.0, 7.1 Hz, 1H)                                   | HMBC 28→30 TOCSY 28→29,29' ROESY 28→38 |
| 29 | 42                    | 1.79 (dd, J = 13.6, 7.2 Hz, 1H), 2.45 (dd, J = 13.6, 10.2 Hz, 1H) | HMBC 29→30                             |
| 30 | 57.3                  | -                                                                 |                                        |
| 31 | 135.8                 | -                                                                 |                                        |
| 32 | 122.1                 | 7.14-7.19 (m, 1H) overlap                                         | HMBC 32→34,36                          |
| 33 | 119.2                 | 6.83 (dd, J = 7.4, 7.4 Hz, 1H)                                    |                                        |
| 34 | 128.1                 | 7.14-7.19 (m, 1H) overlap                                         | HMBC 34→32                             |
| 35 | 110                   | 6.78 (d, J = 8.1 Hz, 1H)                                          | COSY 35→34 TOCSY 35→32,33,34           |
| 36 | 147.5                 | -                                                                 |                                        |
| 37 | -                     | 7.33 (d, J = 4.7 Hz, 1H)                                          | HMBC 37→31 ROESY 37→35                 |
| 38 | 82.2                  | 6.12 (d, J = 4.7 Hz, 1H)                                          |                                        |
| 39 | 170                   | -                                                                 |                                        |
| 40 | -                     | 7.43 (d, J = 9.0 Hz, 1H)                                          | ROESY 40→29                            |
| 41 | 52.1                  | 4.10-4.16 (m, 1H)                                                 | HMBC 41→43, 48                         |
| 42 | 38.4                  | 2.23 (dd, J = 13.4, 8.8 Hz, 1H), 2.59 (dd, J = 13.4, 4.7 Hz, 1H)  | HMBC 42→43,48                          |
| 43 | 126.9                 | -                                                                 |                                        |
| 44 | 130.1                 | 6.46 (d, J = 8.3 Hz, 2H)                                          | HMBC 44→46                             |
| 45 | 114.5                 | 6.29 (d, J = 8.3 Hz, 2H)                                          | HMBC 45→43,46                          |
| 46 | 155.4                 | -                                                                 |                                        |
| 47 | -                     | 9.01 (s, 1H)                                                      | HMBC 47→45,46                          |
| 48 | 172.1                 | -                                                                 |                                        |
| 49 | -                     | 6.68 (br s, 1H), 7.20 (br s, 1 H)                                 | HMBC 49→48 TOCSY 49→49'                |

Macrocyclic Product 31f

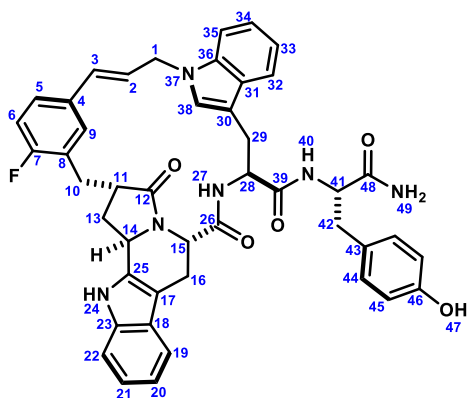

(500 MHz, DMSO-*d*<sub>6</sub>, 298K)

|    | 13C                 | 1H                                                               | key correlation              |
|----|---------------------|------------------------------------------------------------------|------------------------------|
| 1  | 46.1                | 4.72 (dd, J = 15.3, 8.0 Hz, 1H), 5.02 (dd, J = 15.3, 3.5 Hz, 1H) | HMBC 1'→38                   |
| 2  | 124.9               | 6.08 (ddd, J = 15.6, 8.0, 3.5 Hz, 1H)                            | TOCSY 2→1,3 HMBC 2→4         |
| 3  | 130.8               | 6.40 (br d, J = 15.6 Hz, 1H)                                     | HMBC 3→5,9                   |
| 4  | 132.3               | -                                                                |                              |
| 5  | 127                 | 7.25-7.29 (m, 1H) overlap                                        | HMBC 5→9 TOCSY 5→6,9         |
| 6  | 120.9               | 7.13-7.19 (m, 1H) overlap                                        | HMBC 6→7,8                   |
| 7  | 160.0 (d, J≈230 Hz) | -                                                                |                              |
| 8  | 124.3               | -                                                                |                              |
| 9  | 127.8               | 7.10 (br d, JHF = 6.8 Hz, 1H)                                    | HMBC 9→10                    |
| 10 | 26.4                | 2.89-2.95 (m, 1H) overlap, 2.97-3.02 (m, 1H) overlap             |                              |
| 11 | 41.4                | 2.76-2.81 (m, 1H) overlap                                        |                              |
| 12 | 174.5               | -                                                                |                              |
| 13 | 28.2                | 2.76-2.81 (m, 1H) overlap                                        | HMBC 13→10,12,14 COSY 13'→11 |
| 14 | 50.7                | 4.96 (dd, J = 6.9, 6.9 Hz, 1H)                                   |                              |
| 15 | 48.6                | 5.13 (d, J = 7.7 Hz, 1H)                                         | COSY 15→16 HMBC 15→14,26     |
| 16 | 24.5                | 2.94-3.06 (m, 2H) overlap                                        | HMBC 16→17                   |
| 17 | 103                 | -                                                                |                              |
| 18 | 126                 | -                                                                |                              |
| 19 | 117.5               | 7.36 (d, J = 7.7 Hz, 1H)                                         | HMBC 19→23 COSY 19→20        |
| 20 | 118.3               | 6.93 (dd, J = 7.7, 7.0 Hz, 1H)                                   | HMBC 20→22                   |
| 21 | 120.4               | 6.99 (dd, J = 8.0, 7.0 Hz, 1H)                                   | HMBC 21→23                   |
| 22 | 110.5               | 7.22 (d, J = 8.0 Hz, 1H)                                         |                              |
| 23 | 135.5               | -                                                                |                              |
| 24 | -                   | 10.90 (s, 1H)                                                    |                              |
| 25 | 133.4               | -                                                                |                              |
| 26 | 170.4               | -                                                                |                              |
| 27 | -                   | 8.53 (d, J = 8.9 Hz, 1H)                                         | HMBC 27→26 COSY 27→28        |
| 28 | 52.3                | 4.48 (dd J = 12.5, 8.9 Hz, 1H)                                   | COSY 28→29                   |
| 29 | 27.5                | 2.85 (dd, J = 14.9, 12.5 Hz, 1H), 2.95-3.00 (m, 1H) overlap      | HMBC 29→28,30,36,38          |
| 30 | 110.7               | -                                                                |                              |
| 31 | 127.3               | -                                                                |                              |
| 32 | 118                 | 7.55 (d, J = 7.7 Hz, 1H)                                         | HMBC 32→36 COSY 32→33        |
| 33 | 118.3               | 7.04-7.08 (m, 1H)                                                |                              |
| 34 | 120.9               | 7.13-7.19 (m, 1H) overlap                                        |                              |
| 35 | 109.5               | 7.50 (d, J = 8.0 Hz, 1H)                                         | HMBC 35→31 COSY 35→34        |
| 36 | 135.8               | -                                                                |                              |
| 37 | -                   | -                                                                |                              |
| 38 | 124.5               | 7.13 (s, 1H)                                                     | HMBC 38→30,31                |
| 39 | 170.8               | -                                                                |                              |
| 40 | -                   | 7.59 (d, J = 7.4 Hz, 1H)                                         | HMBC 40→39 COSY 40→41        |
| 41 | 53                  | 4.29 (ddd, J = 7.4, 6.9, 5.9 Hz, 1H)                             | HMBC 41→48                   |
| 42 | 36.6                | 2.67 (dd, J = 13.6, 6.2 Hz, 1H), 2.74-2.79 (m, 1H)               | HMBC 42→43,44,48             |
| 43 | 126.6               | -                                                                |                              |
| 44 | 130                 | 6.87 (d, J = 8.1 Hz, 2H)                                         | HMBC 44→46                   |
| 45 | 114.5               | 6.60 (d, J = 8.1 Hz, 2H)                                         |                              |
| 46 | 155.6               | -                                                                |                              |
| 47 | -                   | 9.14 (s, 1H)                                                     | HMBC 47→45,46                |
| 48 | 172.1               | -                                                                |                              |
| 49 | -                   | 7.07 (br s, 1H), 7.42 (br s, 1H)                                 | TOCSY 49→49'                 |

## D.5. Cartesian Coordinates and Energies

### endo-S8a

|   |          |          |          |
|---|----------|----------|----------|
| C | -3.65254 | -1.89937 | -1.30364 |
| C | -5.04592 | -1.87265 | -1.21534 |
| C | -5.67208 | -1.11016 | -0.23219 |
| C | -4.93516 | -0.35776 | 0.68429  |
| H | -3.16165 | -2.49622 | -2.06652 |
| H | -5.64267 | -2.45273 | -1.90989 |
| H | -6.75505 | -1.10162 | -0.17023 |
| H | -5.43144 | 0.23239  | 1.44747  |
| C | -2.91538 | -1.16441 | -0.39134 |
| C | -3.55309 | -0.40120 | 0.58810  |
| N | -2.60454 | 0.28788  | 1.37671  |
| H | -2.86217 | 0.44020  | 2.34264  |
| C | 0.05221  | 1.03266  | -0.33344 |
| C | -1.31957 | -0.34132 | 1.15404  |
| C | -1.42475 | -0.95636 | -0.26333 |
| C | -0.95287 | 0.22242  | -1.15781 |
| H | 1.07725  | 0.71040  | -0.55852 |
| H | -1.83566 | 0.82199  | -1.39512 |
| H | -0.50429 | -0.12812 | -2.08958 |
| H | -1.07029 | -1.09267 | 1.91032  |
| N | -0.21921 | 0.63291  | 1.07180  |
| C | 0.61154  | 0.89928  | 2.07488  |
| O | 1.52393  | 1.77517  | 1.96261  |
| C | 0.51748  | 0.17503  | 3.38150  |
| H | 1.25290  | 0.60148  | 4.06088  |
| H | -0.47749 | 0.28040  | 3.82026  |
| H | 0.72233  | -0.89108 | 3.25017  |
| C | -0.57253 | -2.22769 | -0.44730 |
| H | -1.00702 | -3.01964 | 0.17237  |
| H | -0.66708 | -2.55236 | -1.48915 |
| C | 0.87211  | -2.01609 | -0.09990 |
| C | 1.84650  | -1.82457 | -0.99427 |
| C | 5.90415  | -0.72593 | -0.21476 |
| C | 5.14560  | -1.31083 | 0.79772  |
| C | 3.83169  | -1.68920 | 0.55772  |
| C | 3.24980  | -1.48727 | -0.70109 |
| C | 4.02771  | -0.91275 | -1.71303 |
| C | 5.34283  | -0.53116 | -1.47233 |
| H | 6.93286  | -0.43830 | -0.02628 |
| H | 5.58694  | -1.48391 | 1.77361  |
| H | 3.26709  | -2.17653 | 1.34729  |
| H | 3.59649  | -0.76649 | -2.70004 |
| H | 5.93104  | -0.08871 | -2.26929 |
| H | 1.59110  | -1.87991 | -2.05355 |
| H | 1.10891  | -1.96191 | 0.96268  |
| C | 0.05989  | 2.54748  | -0.52321 |
| O | 0.75937  | 3.25196  | 0.23997  |
| N | -0.58782 | 3.09381  | -1.53696 |
| H | -1.14792 | 2.51037  | -2.13755 |
| C | -0.52695 | 4.52842  | -1.80230 |
| H | 0.51377  | 4.85242  | -1.84832 |
| H | -1.01413 | 4.72381  | -2.75583 |
| H | -1.03444 | 5.08264  | -1.01033 |
| H | 1.30123  | 2.49564  | 1.15336  |

Electronic energy = -1206.29662

Zero-point electronic energy = -1205.838057

Enthalpy = -1205.812183

Free energy = -1205.895946

Free energy with quasiharmonic approximation = -1205.888241

Frequencies = 9.7358 18.3170 29.2224 7.7708 17.7819 29.1975

SCF ( $\omega$ B97x-D/6-311+G(d,p)-SMD (nitromethane)) = -1206.651967

### exo-S8b

|   |          |          |          |
|---|----------|----------|----------|
| C | 0.13178  | 3.07047  | -1.74284 |
| C | 0.55336  | 4.37135  | -1.46768 |
| C | 0.57434  | 4.83884  | -0.15470 |
| C | 0.17761  | 4.02984  | 0.91015  |
| H | 0.11792  | 2.70129  | -2.76436 |
| H | 0.86730  | 5.02110  | -2.27656 |
| H | 0.90530  | 5.85195  | 0.04669  |
| H | 0.19246  | 4.40270  | 1.92882  |
| C | -0.25039 | 2.25787  | -0.68750 |
| C | -0.22975 | 2.73638  | 0.61967  |
| N | -0.67979 | 1.75229  | 1.53460  |
| H | -0.14337 | 1.71789  | 2.39143  |
| C | -2.94794 | -0.20474 | -0.11034 |
| C | -0.76119 | 0.49343  | 0.82521  |
| C | -0.79239 | 0.84967  | -0.68533 |
| C | -2.30489 | 0.84971  | -1.01130 |
| H | -3.92593 | 0.13862  | 0.24705  |
| H | -2.50391 | 0.70403  | -2.07566 |
| H | -2.72819 | 1.82257  | -0.75339 |
| H | 0.06734  | -0.18206 | 1.06437  |
| N | -2.02978 | -0.25038 | 1.05573  |
| C | -2.37207 | -0.76405 | 2.22739  |
| O | -3.40972 | -1.49936 | 2.35819  |
| C | -1.58206 | -0.47944 | 3.46008  |
| H | -0.51382 | -0.63711 | 3.29006  |
| H | -1.92377 | -1.13671 | 4.25710  |
| H | -1.73637 | 0.56368  | 3.74925  |
| C | 0.00213  | -0.15685 | -1.54282 |
| H | -0.11608 | 0.13879  | -2.59424 |
| H | -0.44125 | -1.15552 | -1.43945 |
| C | 1.45529  | -0.21252 | -1.17917 |
| C | 2.04814  | -1.28870 | -0.65218 |
| C | 6.13462  | -1.69270 | 0.53466  |
| C | 5.34772  | -2.81718 | 0.30678  |
| C | 4.01748  | -2.66948 | -0.06907 |
| C | 3.45536  | -1.39882 | -0.23430 |
| C | 4.25465  | -0.27476 | 0.01214  |
| C | 5.58261  | -0.42158 | 0.38911  |
| H | 7.17260  | -1.80530 | 0.82914  |
| H | 5.77035  | -3.80965 | 0.42223  |
| H | 3.40894  | -3.55155 | -0.25038 |
| H | 3.83311  | 0.72194  | -0.07763 |
| H | 6.18879  | 0.45849  | 0.57702  |
| H | 1.45651  | -2.19847 | -0.53317 |
| H | 2.02299  | 0.69872  | -1.35246 |
| C | -3.21985 | -1.61320 | -0.65216 |
| O | -3.68961 | -2.45801 | 0.13531  |
| N | -3.02142 | -1.90019 | -1.92996 |
| H | -2.62090 | -1.20455 | -2.53786 |
| C | -3.34910 | -3.21328 | -2.47846 |
| H | -3.21789 | -3.17824 | -3.55851 |
| H | -2.69564 | -3.97808 | -2.05437 |
| H | -4.38437 | -3.46421 | -2.24307 |
| H | -3.69341 | -1.93509 | 1.43346  |

Electronic energy = -1206.293965

Zero-point electronic energy = -1205.834231

Enthalpy = -1205.808495

Free energy = -1205.89108

Free energy with quasiharmonic approximation = -1205.884366

Frequencies = 20.3237 21.1131 27.0296 20.0715 20.6065 27.0291

SCF ( $\omega$ B97x-D/6-311+G(d,p)-SMD (nitromethane)) = -1206.650935

#### endo-S9a

|   |          |         |          |
|---|----------|---------|----------|
| C | 0.59409  | 2.21537 | -1.07645 |
| C | 0.33928  | 3.34287 | -0.29516 |
| C | -0.14201 | 3.23030 | 1.01152  |

|   |          |          |          |
|---|----------|----------|----------|
| C | -0.37199 | 1.98243  | 1.58888  |
| H | -0.33696 | 4.12706  | 1.58875  |
| H | -0.74652 | 1.88542  | 2.60194  |
| C | 0.14414  | -1.24759 | 0.11475  |
| C | 0.44101  | -0.42690 | -1.09927 |
| C | 0.36448  | 0.96897  | -0.51704 |
| C | -0.10339 | 0.88550  | 0.79026  |
| H | 0.99257  | 2.31439  | -2.07947 |
| H | 0.51867  | 4.32753  | -0.71179 |
| N | -0.24202 | -0.49480 | 1.10221  |
| H | -0.61064 | -0.84250 | 1.97795  |
| H | 0.04505  | -2.32360 | 0.14684  |
| C | 1.74465  | -0.82532 | -1.80664 |
| H | 1.61801  | -1.82814 | -2.22689 |
| H | 1.92816  | -0.13551 | -2.63360 |
| C | 2.95921  | -0.81523 | -0.87686 |
| H | 3.79430  | -1.25184 | -1.43822 |
| H | 3.22134  | 0.36237  | 1.38033  |
| C | 3.38691  | 0.64506  | -0.61737 |
| O | 3.58330  | 1.37977  | -1.57255 |
| N | 3.52598  | 1.01258  | 0.67417  |
| C | 3.83793  | 2.37700  | 1.05470  |
| H | 2.94399  | 2.89849  | 1.41081  |
| H | 4.21828  | 2.89119  | 0.17274  |
| H | 4.59950  | 2.38821  | 1.83684  |
| N | 2.63501  | -1.58233 | 0.31259  |
| C | 3.55030  | -2.26179 | 0.89741  |
| C | 5.00271  | -2.35028 | 0.53559  |
| H | 5.42814  | -1.35033 | 0.42236  |
| H | 5.54659  | -2.89276 | 1.30715  |
| H | 5.12265  | -2.87782 | -0.41528 |
| C | -0.77362 | -0.65213 | -2.08855 |
| H | -0.52679 | -0.07919 | -2.98821 |
| H | -0.79561 | -1.71010 | -2.37155 |
| C | -2.09042 | -0.22094 | -1.51523 |
| C | -2.98993 | -1.07354 | -1.01547 |
| C | -6.65317 | -0.09222 | 0.95299  |
| C | -6.46983 | -1.35001 | 0.38694  |
| C | -5.27168 | -1.65893 | -0.24661 |
| C | -4.24381 | -0.71377 | -0.33465 |
| C | -4.43442 | 0.54385  | 0.25320  |
| C | -5.63119 | 0.85259  | 0.88613  |
| H | -7.58653 | 0.14996  | 1.44988  |
| H | -7.25982 | -2.09158 | 0.43794  |
| H | -5.13512 | -2.64021 | -0.69304 |
| H | -3.63668 | 1.28114  | 0.22914  |
| H | -5.76712 | 1.83056  | 1.33613  |
| H | -2.27433 | 0.84988  | -1.47725 |
| H | -2.80304 | -2.14445 | -1.11880 |
| O | 3.24607  | -2.99305 | 1.97199  |
| H | 2.29872  | -2.91197 | 2.13856  |

Electronic energy = -1206.260711

Zero-point electronic energy = -1205.801033

Enthalpy = -1205.774249

Free energy = -1205.859012

Free energy with quasiharmonic approximation = -1205.852514

Frequencies = 19.2280 22.9073 30.1530 18.9306 22.7503 29.7355

SCF ( $\omega$ B97x-D/6-311+G(d,p)–SMD (nitromethane)) = -1206.62461

#### exo-S9b

|   |          |         |          |
|---|----------|---------|----------|
| C | 0.00459  | 0.55603 | 2.13886  |
| C | -0.50069 | 1.79903 | 2.52378  |
| C | -0.98593 | 2.71026 | 1.58168  |
| C | -0.97519 | 2.41311 | 0.22050  |
| H | -1.37843 | 3.66450 | 1.91378  |
| H | -1.34927 | 3.11525 | -0.51602 |



|   |          |          |          |
|---|----------|----------|----------|
| C | 0.33276  | -0.52295 | -1.36394 |
| C | 0.47106  | -0.98909 | 0.04801  |
| C | 0.02747  | 0.24904  | 0.78789  |
| C | -0.45731 | 1.17882  | -0.12723 |
| H | 0.37603  | -0.14507 | 2.87923  |
| H | -0.51969 | 2.06314  | 3.57525  |
| N | -0.27886 | 0.62293  | -1.42282 |
| H | -0.53518 | 1.09553  | -2.28064 |
| H | 0.56051  | -1.09427 | -2.25464 |
| C | 1.88056  | -1.50084 | 0.37763  |
| H | 2.13356  | -2.30601 | -0.32108 |
| H | 1.89728  | -1.92965 | 1.38193  |
| C | 2.92841  | -0.38810 | 0.28204  |
| H | 2.77760  | 0.29429  | 1.12801  |
| H | 4.91294  | -0.40853 | -1.31057 |
| C | 4.31135  | -1.01409 | 0.52417  |
| O | 4.50409  | -1.60760 | 1.57292  |
| N | 5.22014  | -0.85164 | -0.45913 |
| C | 6.55539  | -1.41253 | -0.38085 |
| H | 7.30981  | -0.63441 | -0.52067 |
| H | 6.67333  | -1.85316 | 0.60882  |
| H | 6.69866  | -2.19059 | -1.13590 |
| N | 2.76598  | 0.27483  | -0.99732 |
| C | 2.76223  | 1.55356  | -1.04788 |
| C | 2.94323  | 2.54547  | 0.06311  |
| H | 2.15189  | 2.43490  | 0.81083  |
| H | 2.91876  | 3.55786  | -0.33656 |
| H | 3.90186  | 2.37977  | 0.56100  |
| C | -0.58008 | -2.15777 | 0.25207  |
| H | -0.17773 | -3.05159 | -0.23440 |
| H | -0.59081 | -2.35073 | 1.32887  |
| C | -1.95606 | -1.83837 | -0.25455 |
| C | -2.89564 | -1.25140 | 0.49360  |
| C | -6.81855 | -0.04891 | -0.69695 |
| C | -6.50151 | -0.20355 | 0.64878  |
| C | -5.21808 | -0.58687 | 1.02100  |
| C | -4.23565 | -0.83355 | 0.05569  |
| C | -4.56480 | -0.66061 | -1.29497 |
| C | -5.84527 | -0.27575 | -1.66812 |
| H | -7.81905 | 0.25151  | -0.98948 |
| H | -7.25418 | -0.02636 | 1.40956  |
| H | -4.97724 | -0.71160 | 2.07311  |
| H | -3.81158 | -0.81784 | -2.06186 |
| H | -6.08544 | -0.14651 | -2.71831 |
| H | -2.16503 | -2.08667 | -1.29374 |
| H | -2.66911 | -1.06103 | 1.54340  |
| O | 2.54828  | 2.14082  | -2.23377 |
| H | 2.55695  | 1.44317  | -2.90410 |

Electronic energy = -1206.256415

Zero-point electronic energy = -1205.797275

Enthalpy = -1205.770267

Free energy = -1205.856223

Free energy with quasiharmonic approximation = -1205.848641

Frequencies = 19.4749 23.6198 28.4571 18.2608 23.5533 28.2041

SCF ( $\omega$ B97x-D/6-311+G(d,p)-SMD (nitromethane)) = -1206.625014

#### endo-S10a

|   |          |          |          |
|---|----------|----------|----------|
| C | -0.61327 | -2.41140 | -0.28357 |
| C | -0.38867 | -3.43120 | 0.64432  |
| C | 0.18826  | -3.16034 | 1.88514  |
| C | 0.55650  | -1.86235 | 2.24211  |
| H | 0.35536  | -3.96952 | 2.58690  |
| H | 1.00935  | -1.64896 | 3.20386  |
| C | 0.14536  | 1.15725  | 0.33796  |
| C | -0.32396 | 0.18234  | -0.71414 |
| C | -0.25845 | -1.11749 | 0.06195  |

|   |          |          |          |
|---|----------|----------|----------|
| C | 0.31301  | -0.87504 | 1.30666  |
| H | -1.04578 | -2.63396 | -1.25447 |
| H | -0.65840 | -4.45119 | 0.39456  |
| N | 0.58792  | 0.51701  | 1.38624  |
| H | 1.03799  | 0.96644  | 2.17191  |
| H | 0.40207  | 2.19098  | 0.16195  |
| C | -1.70890 | 0.48451  | -1.30811 |
| H | -1.68525 | 1.45080  | -1.82420 |
| H | -1.90379 | -0.27605 | -2.07072 |
| C | -2.88044 | 0.44846  | -0.31333 |
| H | -2.77420 | -0.44529 | 0.31032  |
| H | -4.79715 | 1.74151  | 0.69835  |
| C | -2.80274 | 1.62743  | 0.65463  |
| O | -1.69880 | 2.05514  | 1.03661  |
| N | -3.95055 | 2.13935  | 1.08152  |
| C | -4.00823 | 3.23866  | 2.03202  |
| H | -5.05264 | 3.45181  | 2.25384  |
| H | -3.53873 | 4.13189  | 1.61399  |
| H | -3.49005 | 2.97127  | 2.95526  |
| H | -4.34823 | 1.07337  | -1.68676 |
| N | -4.16468 | 0.37905  | -0.97087 |
| C | -4.90218 | -0.78415 | -1.19549 |
| O | -5.77447 | -0.78371 | -2.03402 |
| C | -4.58828 | -1.98196 | -0.32551 |
| H | -5.31874 | -2.75526 | -0.55601 |
| H | -3.58517 | -2.37337 | -0.52430 |
| H | -4.64970 | -1.73496 | 0.73865  |
| C | 0.74733  | 0.20492  | -1.86121 |
| H | 0.41034  | -0.52312 | -2.60753 |
| H | 0.72101  | 1.19194  | -2.33621 |
| C | 2.13278  | -0.12116 | -1.38730 |
| C | 3.09559  | 0.79340  | -1.23707 |
| C | 7.04236  | 0.19290  | 0.28807  |
| C | 6.73108  | 1.33453  | -0.44344 |
| C | 5.44153  | 1.51885  | -0.92912 |
| C | 4.44578  | 0.56286  | -0.70007 |
| C | 4.76869  | -0.57561 | 0.05053  |
| C | 6.05628  | -0.76047 | 0.53514  |
| H | 8.04684  | 0.04760  | 0.67104  |
| H | 7.49245  | 2.08270  | -0.63652 |
| H | 5.20486  | 2.41100  | -1.50274 |
| H | 4.00580  | -1.31711 | 0.27017  |
| H | 6.29290  | -1.64859 | 1.11197  |
| H | 2.32174  | -1.16204 | -1.13570 |
| H | 2.88787  | 1.81916  | -1.54758 |

Electronic energy = -1206.278598

Zero-point electronic energy = -1205.818735

Enthalpy = -1205.791944

Free energy = -1205.877745

Free energy with quasiharmonic approximation = -1205.87002

Frequencies = 17.7690 20.5309 26.5737 15.961 20.3445 25.9945

SCF ( $\omega$ B97x-D/6-311+G(d,p)-SMD (nitromethane)) = -1206.643914

#### exo-S10b

|   |          |          |          |
|---|----------|----------|----------|
| C | 0.06138  | 0.65067  | 2.04339  |
| C | -0.43709 | 1.91897  | 2.34548  |
| C | -0.95065 | 2.75677  | 1.35031  |
| C | -0.97484 | 2.35839  | 0.01596  |
| H | -1.33411 | 3.73422  | 1.61943  |
| H | -1.36289 | 3.00331  | -0.76394 |
| C | 0.22142  | -0.71466 | -1.37176 |
| C | 0.45842  | -1.05450 | 0.06470  |
| C | 0.04494  | 0.24105  | 0.71898  |
| C | -0.46428 | 1.10076  | -0.24969 |
| H | 0.44942  | 0.00633  | 2.82576  |
| H | -0.42803 | 2.26316  | 3.37377  |

|   |          |          |          |
|---|----------|----------|----------|
| N | -0.32967 | 0.44771  | -1.50299 |
| H | -0.53627 | 0.88455  | -2.39511 |
| H | 0.40954  | -1.34899 | -2.23008 |
| C | 1.90339  | -1.51637 | 0.34341  |
| H | 2.14114  | -2.35601 | -0.32083 |
| H | 1.97287  | -1.91235 | 1.35862  |
| C | 2.95720  | -0.41102 | 0.17837  |
| H | 2.78099  | 0.34939  | 0.94414  |
| H | 5.17814  | 0.15496  | -0.97752 |
| C | 4.34891  | -0.99492 | 0.48398  |
| O | 4.46954  | -1.81950 | 1.37534  |
| N | 5.37111  | -0.50806 | -0.24494 |
| C | 6.73541  | -0.94518 | 0.00048  |
| H | 6.86017  | -2.00086 | -0.25354 |
| H | 7.41158  | -0.34577 | -0.60831 |
| H | 6.98645  | -0.81589 | 1.05526  |
| H | 2.81654  | -0.34245 | -1.93926 |
| N | 2.83565  | 0.24108  | -1.11206 |
| C | 2.48769  | 1.55601  | -1.35678 |
| O | 2.00916  | 1.85821  | -2.43758 |
| C | 2.72659  | 2.55665  | -0.25017 |
| H | 1.97039  | 2.46333  | 0.53590  |
| H | 3.71050  | 2.42669  | 0.20761  |
| H | 2.65000  | 3.55268  | -0.68334 |
| C | -0.54872 | -2.21379 | 0.44722  |
| H | -0.15780 | -3.14601 | 0.02828  |
| H | -0.49861 | -2.30292 | 1.53628  |
| C | -1.95229 | -1.95432 | -0.02417 |
| C | -2.82977 | -1.21312 | 0.65997  |
| C | -6.71768 | 0.04152  | -0.58080 |
| C | -6.03290 | 0.72931  | 0.41629  |
| C | -4.77583 | 0.29491  | 0.82073  |
| C | -4.18031 | -0.82476 | 0.22862  |
| C | -4.88507 | -1.51655 | -0.76454 |
| C | -6.14228 | -1.08490 | -1.16596 |
| H | -7.70228 | 0.37314  | -0.89302 |
| H | -6.48114 | 1.59968  | 0.88374  |
| H | -4.24366 | 0.83135  | 1.60231  |
| H | -4.46222 | -2.41365 | -1.20662 |
| H | -6.68231 | -1.63521 | -1.92926 |
| H | -2.22098 | -2.35323 | -1.00079 |
| H | -2.51843 | -0.80980 | 1.62415  |

Electronic energy = -1206.271678

Zero-point electronic energy = -1205.812548

Enthalpy = -1205.78562

Free energy = -1205.870566

Free energy with quasiharmonic approximation = -1205.863948

Frequencies = 17.9357 23.6279 31.9068 17.6562 23.1809 30.5095

SCF ( $\omega$ B97x-D/6-311+G(d,p)-SMD (nitromethane)) = -1206.645547

#### endo-S11a

|   |          |          |          |
|---|----------|----------|----------|
| C | -0.50878 | 1.57609  | -0.34865 |
| C | -1.55569 | 2.21608  | 0.27854  |
| C | -2.21965 | 1.63211  | 1.38185  |
| C | -1.84693 | 0.39952  | 1.88545  |
| H | -3.03652 | 2.16972  | 1.85133  |
| H | -2.35254 | -0.03910 | 2.73859  |
| C | 0.79130  | -1.69865 | 0.61280  |
| C | 0.90649  | -0.61560 | -0.25342 |
| C | -0.10546 | 0.31142  | 0.13628  |
| C | -0.79674 | -0.25527 | 1.23912  |
| H | 0.03938  | 2.04176  | -1.16080 |
| H | -1.87169 | 3.19411  | -0.06776 |
| N | -0.21511 | -1.47541 | 1.50847  |
| H | -0.44099 | -2.07614 | 2.28368  |
| H | 1.44588  | -2.55452 | 0.71506  |

|   |          |          |          |
|---|----------|----------|----------|
| C | 1.96711  | -0.45785 | -1.30209 |
| H | 2.23313  | -1.44354 | -1.69935 |
| H | 1.60742  | 0.15509  | -2.13175 |
| C | 3.25819  | 0.19706  | -0.75830 |
| H | 4.04110  | 0.06857  | -1.51327 |
| H | 4.44476  | 1.71201  | 0.86853  |
| C | 3.07871  | 1.71939  | -0.62161 |
| O | 2.32861  | 2.32102  | -1.38030 |
| N | 3.82214  | 2.30206  | 0.33720  |
| C | 3.84350  | 3.73726  | 0.54133  |
| H | 4.77611  | 4.17554  | 0.17478  |
| H | 3.73133  | 3.96808  | 1.60286  |
| H | 3.01060  | 4.16772  | -0.01378 |
| H | 3.07501  | -0.28366 | 1.25804  |
| N | 3.71492  | -0.40961 | 0.48048  |
| C | 4.27544  | -1.67931 | 0.53700  |
| O | 4.05159  | -2.40138 | 1.49076  |
| C | 5.17753  | -2.08406 | -0.60584 |
| H | 4.59636  | -2.29344 | -1.51008 |
| H | 5.90009  | -1.29959 | -0.84468 |
| H | 5.70351  | -2.99219 | -0.31589 |
| C | -0.63597 | -2.54943 | -1.46369 |
| H | -0.19352 | -1.91889 | -2.22653 |
| H | -0.14651 | -3.49729 | -1.27058 |
| C | -1.86786 | -2.25865 | -0.93885 |
| C | -2.47292 | -1.03559 | -1.23326 |
| C | -6.06038 | 0.60075  | 0.25445  |
| C | -5.62052 | -0.63156 | 0.75047  |
| C | -4.45010 | -1.18809 | 0.27424  |
| C | -3.69469 | -0.51876 | -0.71464 |
| C | -4.14484 | 0.73193  | -1.18741 |
| C | -5.32418 | 1.28285  | -0.71104 |
| H | -6.98344 | 1.03021  | 0.62973  |
| H | -6.20162 | -1.14963 | 1.50492  |
| H | -4.11639 | -2.14296 | 0.66516  |
| H | -3.55728 | 1.26039  | -1.93146 |
| H | -5.67085 | 2.23792  | -1.08877 |
| H | -2.32530 | -2.94802 | -0.23800 |
| H | -1.96467 | -0.40832 | -1.96323 |

Electronic energy = -1206.248692

Zero-point electronic energy = -1205.791499

Enthalpy = -1205.763839

Free energy = -1205.850423

Free energy with quasiharmonic approximation = -1205.843558

Frequencies = 19.3215 28.6206 31.0126 18.1164 26.3444 30.9326

SCF ( $\omega$ B97x-D/6-311+G(d,p)-SMD (nitromethane)) = -1206.606497

exo-S11b

|   |          |          |          |
|---|----------|----------|----------|
| C | 0.35249  | 1.43927  | 0.32179  |
| C | 1.34110  | 1.86757  | 1.17296  |
| C | 2.05123  | 0.95328  | 1.99246  |
| C | 1.77453  | -0.39720 | 1.99265  |
| H | 2.82866  | 1.33210  | 2.64709  |
| H | 2.31904  | -1.08562 | 2.62879  |
| C | -0.64136 | -2.05874 | -0.11058 |
| C | -0.86466 | -0.71996 | -0.47163 |
| C | 0.04952  | 0.05540  | 0.28033  |
| C | 0.77170  | -0.83791 | 1.12063  |
| H | -0.20894 | 2.15160  | -0.27309 |
| H | 1.57826  | 2.92339  | 1.23415  |
| N | 0.28288  | -2.09937 | 0.90506  |
| H | 0.60459  | -2.93757 | 1.35960  |
| H | -1.29615 | -2.89334 | -0.31935 |
| C | -1.90707 | -0.25059 | -1.43596 |
| H | -2.15660 | -1.05260 | -2.13364 |
| H | -1.53257 | 0.60282  | -2.01185 |

|   |          |          |          |
|---|----------|----------|----------|
| C | -3.21469 | 0.18112  | -0.73533 |
| H | -3.92329 | 0.46846  | -1.51852 |
| H | -4.77991 | 0.26877  | 1.22427  |
| C | -3.85688 | -1.02367 | -0.02178 |
| O | -3.63486 | -2.16335 | -0.41517 |
| N | -4.67298 | -0.70945 | 0.99992  |
| C | -5.43535 | -1.70279 | 1.73128  |
| H | -5.22760 | -1.63416 | 2.80183  |
| H | -6.50752 | -1.56789 | 1.56657  |
| H | -5.14157 | -2.68650 | 1.36636  |
| H | -2.42539 | 1.16447  | 0.93980  |
| N | -3.04433 | 1.31486  | 0.15026  |
| C | -2.99579 | 2.63710  | -0.27030 |
| O | -2.36380 | 3.45401  | 0.37111  |
| C | -3.77839 | 2.99651  | -1.51329 |
| H | -3.31085 | 2.57628  | -2.40983 |
| H | -4.80616 | 2.62672  | -1.46332 |
| H | -3.78618 | 4.08142  | -1.60277 |
| C | 0.68405  | -2.17577 | -1.98058 |
| H | 0.32493  | -3.18935 | -2.12035 |
| H | 0.22209  | -1.43039 | -2.61775 |
| C | 1.95426  | -1.94213 | -1.44948 |
| C | 2.46743  | -0.66566 | -1.41065 |
| C | 5.97873  | 0.79728  | 0.44515  |
| C | 5.69100  | -0.56843 | 0.51846  |
| C | 4.55501  | -1.07203 | -0.08964 |
| C | 3.68504  | -0.21394 | -0.79008 |
| C | 3.98570  | 1.15847  | -0.84693 |
| C | 5.12642  | 1.66053  | -0.23655 |
| H | 6.87303  | 1.18534  | 0.92115  |
| H | 6.36084  | -1.23438 | 1.05095  |
| H | 4.34624  | -2.13480 | -0.02735 |
| H | 3.31356  | 1.82828  | -1.37452 |
| H | 5.35123  | 2.71957  | -0.29422 |
| H | 2.47882  | -2.76410 | -0.97375 |
| H | 1.88770  | 0.10766  | -1.91207 |

Electronic energy = -1206.24628

Zero-point electronic energy = -1205.789749

Enthalpy = -1205.761895

Free energy = -1205.849304

Free energy with quasiharmonic approximation = -1205.841912

Frequencies = 20.2143 23.7933 32.2510 18.1639 23.1791 31.7262

SCF (wB97x-D/6-311+G(d,p)-SMD (nitromethane)) = -1206.610209

#### endo-S12a

|   |          |          |          |
|---|----------|----------|----------|
| C | -0.40653 | 1.22909  | 2.08384  |
| C | -0.13915 | 2.18622  | 3.01285  |
| C | 0.15055  | 3.53157  | 2.61217  |
| C | 0.19361  | 3.93006  | 1.30299  |
| H | -0.61249 | 0.20601  | 2.37915  |
| H | -0.13768 | 1.94560  | 4.06915  |
| H | 0.35140  | 4.26428  | 3.38721  |
| H | 0.42184  | 4.95249  | 1.02659  |
| C | -0.38883 | 1.59327  | 0.70180  |
| C | -0.06808 | 2.94353  | 0.32482  |
| N | -0.05979 | 3.04689  | -1.00249 |
| H | 0.12544  | 3.89376  | -1.51660 |
| C | -2.28571 | -0.96706 | 0.06393  |
| C | -0.36785 | 1.77242  | -1.62923 |
| C | -0.61790 | 0.88060  | -0.45413 |
| C | -0.93509 | -0.56614 | -0.58167 |
| H | -2.26585 | -0.69658 | 1.12379  |
| H | -0.13670 | -1.13705 | -0.09338 |
| H | -0.94782 | -0.86101 | -1.63444 |
| C | -2.12867 | -3.35027 | 0.87623  |
| O | -2.14029 | -4.51590 | 0.55139  |

|   |          |          |          |
|---|----------|----------|----------|
| C | -1.69910 | -2.87860 | 2.24930  |
| H | -2.46748 | -2.26612 | 2.73052  |
| H | -1.51359 | -3.76188 | 2.85777  |
| H | -0.77260 | -2.29639 | 2.19228  |
| C | 2.01988  | 0.92738  | -1.75432 |
| C | 2.49908  | -0.31499 | -1.63968 |
| C | 5.85431  | -1.66563 | 0.63664  |
| C | 5.68924  | -0.30176 | 0.40191  |
| C | 4.61013  | 0.15431  | -0.34223 |
| C | 3.67195  | -0.74630 | -0.86333 |
| C | 3.85618  | -2.11385 | -0.63003 |
| C | 4.93576  | -2.57155 | 0.11694  |
| H | 6.70249  | -2.01962 | 1.21289  |
| H | 6.41281  | 0.40727  | 0.79046  |
| H | 4.51130  | 1.21787  | -0.53620 |
| H | 3.14567  | -2.82743 | -1.03953 |
| H | 5.06390  | -3.63538 | 0.28607  |
| H | 1.97306  | -1.11735 | -2.15994 |
| H | 2.50862  | 1.75501  | -1.24386 |
| C | -3.40814 | -0.11590 | -0.55390 |
| O | -3.15532 | 1.01342  | -0.96725 |
| N | -4.62816 | -0.66234 | -0.56340 |
| H | -4.73159 | -1.59876 | -0.20177 |
| C | -5.78117 | 0.06244  | -1.07197 |
| H | -5.68794 | 0.23119  | -2.14758 |
| H | -6.67865 | -0.52308 | -0.87730 |
| H | -5.86762 | 1.03151  | -0.57624 |
| N | -2.55105 | -2.37792 | -0.02714 |
| H | -2.68017 | -2.76346 | -0.95576 |
| C | 0.78314  | 1.26340  | -2.53444 |
| H | 0.97516  | 2.03657  | -3.28724 |
| H | 0.41920  | 0.38637  | -3.07786 |
| H | -1.29861 | 1.85617  | -2.20101 |

Electronic energy = -1206.269077

Zero-point electronic energy = -1205.811117

Enthalpy = -1205.78361

Free energy = -1205.871697

Free energy with quasiharmonic approximation = -1205.863297

Frequencies = 15.0188 17.4051 26.4670 14.2611 16.3115 26.4469

SCF ( $\omega$ B97x-D/6-311+G(d,p)-SMD (nitromethane)) = -1206.635761

#### exo-S12b

|   |          |          |          |
|---|----------|----------|----------|
| C | 3.87596  | 0.23927  | -1.59853 |
| C | 5.22382  | 0.07271  | -1.67596 |
| C | 5.91187  | -0.76665 | -0.73992 |
| C | 5.27787  | -1.44086 | 0.26964  |
| H | 3.35019  | 0.87942  | -2.29778 |
| H | 5.79795  | 0.57726  | -2.44366 |
| H | 6.98763  | -0.86939 | -0.84034 |
| H | 5.82197  | -2.06684 | 0.96662  |
| C | 3.16240  | -0.44700 | -0.56728 |
| C | 3.87730  | -1.28179 | 0.36001  |
| N | 3.01900  | -1.81617 | 1.22514  |
| H | 3.27073  | -2.42034 | 1.99165  |
| C | -0.17852 | 1.11501  | -0.08441 |
| C | 1.65588  | -1.39508 | 0.95016  |
| C | 1.83123  | -0.46601 | -0.21753 |
| C | 0.72058  | 0.20535  | -0.94622 |
| H | -0.68590 | 0.48405  | 0.65279  |
| H | 0.07489  | -0.56784 | -1.37827 |
| H | 1.13584  | 0.79002  | -1.77281 |
| C | -2.52739 | 1.90793  | -0.64149 |
| O | -3.26919 | 2.28630  | -1.52294 |
| C | -2.97654 | 1.62908  | 0.77235  |
| H | -3.98499 | 2.02232  | 0.88617  |
| H | -3.00794 | 0.55030  | 0.95540  |

|   |          |          |          |
|---|----------|----------|----------|
| H | -2.31409 | 2.09067  | 1.51071  |
| C | -0.72560 | -2.22157 | 0.74823  |
| C | -1.57780 | -2.28505 | -0.27958 |
| C | -5.60153 | -0.87798 | -0.08166 |
| C | -5.05204 | -1.54927 | 1.00831  |
| C | -3.75307 | -2.03963 | 0.94361  |
| C | -2.98823 | -1.86673 | -0.21703 |
| C | -3.56263 | -1.22214 | -1.31796 |
| C | -4.85573 | -0.71662 | -1.24590 |
| H | -6.61196 | -0.48746 | -0.02632 |
| H | -5.63781 | -1.69578 | 1.90959  |
| H | -3.33567 | -2.57827 | 1.78891  |
| H | -2.98402 | -1.08842 | -2.22800 |
| H | -5.27454 | -0.18851 | -2.09472 |
| H | -1.21393 | -2.62911 | -1.24907 |
| H | -1.08036 | -1.85230 | 1.71091  |
| C | 0.71449  | 2.07156  | 0.72662  |
| O | 1.67705  | 1.60344  | 1.33423  |
| N | 0.35505  | 3.35985  | 0.72802  |
| H | -0.43505 | 3.61564  | 0.15357  |
| C | 1.06820  | 4.38333  | 1.46992  |
| H | 0.41335  | 4.84549  | 2.21223  |
| H | 1.90843  | 3.90934  | 1.97619  |
| H | 1.44229  | 5.15435  | 0.79230  |
| N | -1.17280 | 1.74979  | -0.91215 |
| H | -0.94881 | 1.92948  | -1.88225 |
| C | 0.72018  | -2.60671 | 0.68740  |
| H | 0.93631  | -3.34737 | 1.46585  |
| H | 0.97566  | -3.06470 | -0.27331 |
| H | 1.28395  | -0.81120 | 1.79957  |

Electronic energy = -1206.276962

Zero-point electronic energy = -1205.81826

Enthalpy = -1205.791216

Free energy = -1205.875586

Free energy with quasiharmonic approximation = -1205.870073

Frequencies = 21.7826 32.8790 38.6054 21.4997 32.8436 38.4241

SCF ( $\omega$ B97x-D/6-311+G(d,p)-SMD (nitromethane)) = -1206.63836

### S13

|   |          |          |          |
|---|----------|----------|----------|
| C | 3.87314  | 1.26551  | -0.33618 |
| C | 5.12156  | 1.34583  | 0.25503  |
| C | 5.75570  | 0.19986  | 0.76947  |
| C | 5.15685  | -1.04638 | 0.69849  |
| H | 3.39658  | 2.15358  | -0.74101 |
| H | 5.62305  | 2.30551  | 0.32470  |
| H | 6.73369  | 0.29508  | 1.22995  |
| H | 5.64720  | -1.93003 | 1.09471  |
| C | 3.23895  | 0.01723  | -0.41489 |
| C | 3.89594  | -1.11946 | 0.10322  |
| N | 3.06673  | -2.19695 | -0.10525 |
| H | 3.27084  | -3.14765 | 0.14980  |
| C | 0.28332  | 1.43008  | -0.51221 |
| C | 1.91006  | -1.78036 | -0.73317 |
| C | 1.97482  | -0.42388 | -0.94241 |
| C | 0.91510  | 0.45029  | -1.53500 |
| H | 1.00939  | 2.21908  | -0.28947 |
| H | 0.11614  | -0.16732 | -1.95600 |
| H | 1.30885  | 1.05992  | -2.35308 |
| C | -0.34655 | 1.23095  | 1.92826  |
| O | -0.53980 | 0.48950  | 2.88233  |
| C | -0.41813 | 2.73726  | 2.03738  |
| H | -1.16075 | 3.14429  | 1.34502  |
| H | -0.68896 | 2.99212  | 3.06057  |
| H | 0.54753  | 3.19180  | 1.79523  |
| C | -0.43648 | -2.47405 | -0.26161 |
| C | -1.58725 | -2.07740 | -0.81202 |

|   |          |          |          |
|---|----------|----------|----------|
| C | -5.11342 | -0.61675 | 1.12264  |
| C | -3.91804 | -0.69446 | 1.83339  |
| C | -2.77092 | -1.19744 | 1.23058  |
| C | -2.79655 | -1.62177 | -0.10630 |
| C | -4.00233 | -1.52706 | -0.81318 |
| C | -5.15297 | -1.03957 | -0.20362 |
| H | -6.00584 | -0.21973 | 1.59552  |
| H | -3.86407 | -0.34824 | 2.86025  |
| H | -1.84879 | -1.20130 | 1.80336  |
| H | -4.03402 | -1.83654 | -1.85446 |
| H | -6.07867 | -0.98005 | -0.76736 |
| H | -1.64853 | -2.04241 | -1.90050 |
| H | -0.34093 | -2.55187 | 0.82117  |
| C | -0.89806 | 2.11610  | -1.21261 |
| O | -0.70199 | 2.98201  | -2.05311 |
| N | -2.12339 | 1.65060  | -0.88461 |
| H | -2.19739 | 0.90784  | -0.20490 |
| C | -3.31209 | 2.12744  | -1.55653 |
| H | -3.43684 | 3.20390  | -1.40946 |
| H | -3.25431 | 1.94131  | -2.63341 |
| H | -4.17539 | 1.60333  | -1.14547 |
| N | -0.07940 | 0.71434  | 0.69120  |
| H | 0.10236  | -0.27982 | 0.69656  |
| C | 0.81234  | -2.76173 | -1.05432 |
| H | 1.16954  | -3.77768 | -0.84577 |
| H | 0.58615  | -2.72443 | -2.12553 |

Electronic energy = -1205.914871

Zero-point electronic energy = -1205.468035

Enthalpy = -1205.441092

Free energy = -1205.525293

Free energy with quasiharmonic approximation = -1205.519686

Frequencies = 18.8574 30.2699 39.4726 16.6743 30.1767 39.3951

SCF ( $\omega$ B97x-D/6-311+G(d,p)-SMD (nitromethane)) = -1206.22147

#### endo-S14a

|   |          |          |          |
|---|----------|----------|----------|
| C | -0.92522 | 2.46514  | 1.20445  |
| C | -0.71926 | 3.58500  | 0.39637  |
| C | -0.25072 | 3.43226  | -0.90666 |
| C | -0.00951 | 2.16557  | -1.44143 |
| H | -1.28421 | 2.58094  | 2.22297  |
| H | -0.92192 | 4.57666  | 0.78585  |
| H | -0.08725 | 4.30979  | -1.52419 |
| H | 0.32567  | 2.04334  | -2.46640 |
| C | -0.66166 | 1.20720  | 0.68994  |
| C | -0.22526 | 1.06170  | -0.62662 |
| N | -0.09805 | -0.29728 | -0.98959 |
| H | 0.82265  | -0.54579 | -1.33075 |
| C | -2.86855 | -1.00670 | 0.81659  |
| C | -0.53473 | -1.10542 | 0.15562  |
| C | -0.68520 | -0.14479 | 1.37826  |
| C | -2.03675 | -0.51753 | 2.00440  |
| H | -3.63100 | -1.73387 | 1.10065  |
| H | -2.52049 | 0.31876  | 2.51184  |
| H | -1.90248 | -1.33244 | 2.72309  |
| H | 0.18992  | -1.90425 | 0.33315  |
| N | -1.87180 | -1.65648 | -0.02511 |
| C | -2.19194 | -2.75909 | -0.77935 |
| O | -3.33206 | -3.18804 | -0.82629 |
| C | -1.05173 | -3.39679 | -1.54713 |
| H | -0.56011 | -2.66444 | -2.19344 |
| H | -0.29821 | -3.80656 | -0.86646 |
| H | -1.46238 | -4.20543 | -2.14937 |
| C | 0.49755  | -0.27105 | 2.36846  |
| H | 0.30479  | 0.39627  | 3.21699  |
| H | 0.52479  | -1.29660 | 2.75596  |
| C | 1.79616  | 0.08102  | 1.70675  |



|   |          |          |          |
|---|----------|----------|----------|
| C | 2.68880  | -0.80551 | 1.25828  |
| C | 6.12343  | 0.13698  | -1.11780 |
| C | 6.11088  | -1.00263 | -0.31867 |
| C | 4.99151  | -1.30447 | 0.44868  |
| C | 3.86864  | -0.46958 | 0.44016  |
| C | 3.88540  | 0.66311  | -0.38543 |
| C | 5.00525  | 0.96649  | -1.15006 |
| H | 6.99561  | 0.37256  | -1.71907 |
| H | 6.97456  | -1.65964 | -0.29359 |
| H | 4.98794  | -2.19408 | 1.07300  |
| H | 3.00679  | 1.30074  | -0.44231 |
| H | 5.00078  | 1.84815  | -1.78344 |
| H | 2.55104  | -1.86186 | 1.49337  |
| H | 1.95640  | 1.13939  | 1.51129  |
| C | -3.60520 | 0.17458  | 0.16115  |
| O | -4.36174 | 0.85607  | 0.83812  |
| N | -3.35307 | 0.38819  | -1.14933 |
| H | -2.60754 | -0.14327 | -1.57291 |
| C | -3.82051 | 1.58054  | -1.81947 |
| H | -3.05044 | 2.36097  | -1.81780 |
| H | -4.09752 | 1.35006  | -2.85089 |
| H | -4.69483 | 1.94900  | -1.28298 |

Electronic energy = -1205.910736

Zero-point electronic energy = -1205.463152

Enthalpy = -1205.43725

Free energy = -1205.519795

Free energy with quasiharmonic approximation = -1205.513857

Frequencies = 21.9134 27.5511 32.7545 21.6447 26.2233 32.5417

SCF ( $\omega$ B97x-D/6-311+G(d,p)-SMD (nitromethane)) = -1206.212965

#### exo-S14b

|   |          |          |          |
|---|----------|----------|----------|
| C | -0.57873 | 3.21114  | -1.62264 |
| C | -0.46768 | 4.55963  | -1.26976 |
| C | -0.62483 | 4.94323  | 0.05939  |
| C | -0.89625 | 4.00873  | 1.05986  |
| H | -0.45243 | 2.90396  | -2.65751 |
| H | -0.25591 | 5.30425  | -2.02926 |
| H | -0.53157 | 5.99114  | 0.32761  |
| H | -1.01974 | 4.31729  | 2.09293  |
| C | -0.83630 | 2.27536  | -0.63817 |
| C | -1.00045 | 2.67067  | 0.69581  |
| N | -1.29748 | 1.57550  | 1.49828  |
| H | -1.03691 | 1.57878  | 2.47282  |
| C | -2.81803 | -0.84753 | -0.31312 |
| C | -0.99660 | 0.35576  | 0.76552  |
| C | -1.02933 | 0.77812  | -0.72937 |
| C | -2.47176 | 0.39643  | -1.14899 |
| H | -3.88922 | -0.87103 | -0.09493 |
| H | -2.57254 | 0.19990  | -2.21822 |
| H | -3.15286 | 1.20767  | -0.88179 |
| H | -0.03160 | -0.06227 | 1.07331  |
| N | -2.02675 | -0.66838 | 0.89887  |
| C | -2.31844 | -1.14462 | 2.15144  |
| O | -1.65049 | -0.80599 | 3.11768  |
| C | -3.48455 | -2.10262 | 2.26311  |
| H | -3.43801 | -2.89167 | 1.50808  |
| H | -4.42921 | -1.56566 | 2.13011  |
| H | -3.46813 | -2.54212 | 3.25918  |
| C | 0.01961  | 0.06612  | -1.60732 |
| H | -0.07089 | 0.48040  | -2.62013 |
| H | -0.22203 | -0.99857 | -1.68579 |
| C | 1.42429  | 0.22605  | -1.11229 |
| C | 2.19843  | -0.79954 | -0.74667 |
| C | 6.20962  | -0.73781 | 0.75297  |
| C | 5.53353  | 0.46310  | 0.54657  |
| C | 4.23238  | 0.46313  | 0.06256  |

|   |          |          |          |
|---|----------|----------|----------|
| C | 3.57682  | -0.74029 | -0.23103 |
| C | 4.26770  | -1.93799 | -0.01458 |
| C | 5.57055  | -1.94020 | 0.47135  |
| H | 7.22538  | -0.73395 | 1.13509  |
| H | 6.02292  | 1.40647  | 0.76738  |
| H | 3.72185  | 1.41013  | -0.08037 |
| H | 3.77420  | -2.88164 | -0.23240 |
| H | 6.08471  | -2.88278 | 0.63038  |
| H | 1.78670  | -1.80573 | -0.84159 |
| H | 1.79052  | 1.24876  | -1.04182 |
| C | -2.52552 | -2.14425 | -1.08490 |
| O | -3.15124 | -2.41038 | -2.09873 |
| N | -1.55062 | -2.94063 | -0.58431 |
| H | -1.04597 | -2.62533 | 0.22845  |
| C | -1.16277 | -4.15665 | -1.26746 |
| H | -0.27211 | -4.56531 | -0.78887 |
| H | -1.96205 | -4.90206 | -1.22832 |
| H | -0.94746 | -3.95095 | -2.31941 |

Electronic energy = -1205.906997

Zero-point electronic energy = -1205.459681

Enthalpy = -1205.433402

Free energy = -1205.518502

Free energy with quasiharmonic approximation = -1205.510678

Frequencies = 10.9079 20.6879 25.8092 7.4167 19.8246 25.6251

SCF ( $\omega$ B97x-D/6-311+G(d,p)-SMD (nitromethane)) = -1206.210815

#### *endo-S15a*

|   |          |         |          |
|---|----------|---------|----------|
| C | -1.03463 | 4.18378 | 6.98339  |
| C | -1.89573 | 4.70232 | 7.96101  |
| C | -2.41990 | 5.98905 | 7.81197  |
| C | -2.10124 | 6.78301 | 6.70569  |
| H | -0.62408 | 3.18157 | 7.09492  |
| H | -2.15401 | 4.10553 | 8.83107  |
| H | -3.09091 | 6.38561 | 8.56996  |
| H | -2.51445 | 7.78205 | 6.59895  |
| C | -0.72103 | 4.95757 | 5.87512  |
| C | -1.24447 | 6.25423 | 5.73954  |
| N | -0.73102 | 6.86775 | 4.59877  |
| H | -1.26357 | 7.57666 | 4.10858  |
| C | -1.35126 | 3.88029 | 2.93560  |
| C | -0.12768 | 5.85865 | 3.74400  |
| C | 0.19464  | 4.66123 | 4.69148  |
| C | -0.22139 | 3.41047 | 3.88555  |
| H | -1.29789 | 3.33743 | 1.98438  |
| H | -0.53040 | 2.59393 | 4.54290  |
| H | 0.62469  | 3.05410 | 3.28536  |
| H | 0.74394  | 6.27940 | 3.23497  |
| N | -1.02374 | 5.28232 | 2.71740  |
| C | -1.57092 | 6.12007 | 1.77917  |
| O | -1.30848 | 7.32213 | 1.79051  |
| C | -2.48531 | 5.51212 | 0.73092  |
| H | -2.67987 | 6.27391 | -0.02526 |
| H | -2.04194 | 4.63212 | 0.25048  |
| H | -3.43209 | 5.21227 | 1.19115  |
| H | 1.84948  | 3.79010 | 5.81363  |
| H | 2.33014  | 4.48780 | 4.25246  |
| C | -2.78929 | 3.71312 | 3.50608  |
| O | -3.47404 | 4.69679 | 3.75862  |
| N | -3.25404 | 2.43271 | 3.68490  |
| C | -4.57469 | 2.24351 | 4.27254  |
| H | -4.96751 | 3.21720 | 4.56007  |
| H | -5.25550 | 1.77218 | 3.55087  |
| H | -4.50491 | 1.59678 | 5.15641  |
| C | 1.67031  | 4.61882 | 5.11916  |
| H | 1.94906  | 5.54707 | 5.62798  |
| C | -2.57135 | 1.20674 | 3.30552  |

|   |          |         |         |
|---|----------|---------|---------|
| H | -2.32067 | 0.60370 | 4.18958 |
| H | -3.22398 | 0.60231 | 2.66135 |
| H | -1.65214 | 1.40681 | 2.75763 |

Electronic energy = -936.844819  
Zero-point electronic energy = -936.484379  
Enthalpy = -936.464246  
Free energy = -936.530557  
Free energy with quasiharmonic approximation = -936.52905  
Frequencies = 40.5034 59.6520 83.5486 40.1877 59.4894 83.4812  
SCF ( $\omega$ B97x-D/6-311+G(d,p)-SMD (nitromethane)) = -937.0819949

**exo-S15b**

|   |          |          |          |
|---|----------|----------|----------|
| C | 3.03630  | 3.57444  | -0.88876 |
| C | 4.01553  | 3.29890  | -1.85403 |
| C | 4.49228  | 1.99511  | -2.01088 |
| C | 4.01201  | 0.94383  | -1.22182 |
| H | 2.66512  | 4.58968  | -0.76318 |
| H | 4.40428  | 4.09933  | -2.47660 |
| H | 5.25455  | 1.78896  | -2.75794 |
| H | 4.38772  | -0.06749 | -1.35092 |
| C | 2.55899  | 2.54202  | -0.09405 |
| C | 3.03895  | 1.23251  | -0.26480 |
| N | 2.36992  | 0.35749  | 0.59590  |
| H | 2.82871  | -0.48422 | 0.92688  |
| C | 2.83422  | 2.87691  | 3.01142  |
| C | 1.73228  | 1.13896  | 1.63762  |
| C | 1.48694  | 2.53834  | 0.99245  |
| C | 1.75260  | 3.53952  | 2.13238  |
| H | 3.82456  | 3.15176  | 2.63391  |
| H | 0.83270  | 3.70539  | 2.70493  |
| H | 2.08988  | 4.51413  | 1.76931  |
| H | 0.82476  | 0.63369  | 1.98245  |
| N | 2.60224  | 1.43534  | 2.81521  |
| C | 3.31002  | 0.41023  | 3.39527  |
| O | 3.10762  | -0.75866 | 3.06230  |
| C | 4.32914  | 0.76022  | 4.46526  |
| H | 4.92788  | 1.64084  | 4.21411  |
| H | 4.97952  | -0.10572 | 4.59782  |
| H | 3.82744  | 0.96736  | 5.41730  |
| H | -0.03454 | 3.65644  | -0.09427 |
| H | -0.69216 | 2.59050  | 1.16393  |
| C | 2.84112  | 3.44466  | 4.44906  |
| O | 3.74649  | 4.22650  | 4.73004  |
| N | 1.85932  | 3.11725  | 5.35268  |
| C | 1.88571  | 3.76808  | 6.65872  |
| H | 2.84441  | 4.26869  | 6.78127  |
| H | 1.07917  | 4.50990  | 6.74108  |
| H | 1.74820  | 3.01989  | 7.44848  |
| C | 0.08015  | 2.68039  | 0.38987  |
| H | -0.09613 | 1.90778  | -0.36523 |
| C | 0.65941  | 2.33606  | 5.08918  |
| H | -0.22697 | 2.98348  | 5.01851  |
| H | 0.75854  | 1.76022  | 4.17348  |
| H | 0.49510  | 1.63239  | 5.91438  |

Electronic energy = -936.842958  
Zero-point electronic energy = -936.482804  
Enthalpy = -936.462344  
Free energy = -936.53017  
Free energy with quasiharmonic approximation = -936.527984  
Frequencies = 41.4265 45.8845 67.3297 41.397 45.4715 67.3206  
SCF ( $\omega$ B97x-D/6-311+G(d,p)-SMD (nitromethane)) = -937.0800576

**endo-S16a**

|   |         |         |         |
|---|---------|---------|---------|
| C | 4.73179 | 1.67609 | 0.38067 |
| C | 6.00386 | 1.38763 | 0.87756 |
| C | 6.21018 | 0.33926 | 1.77745 |

|   |          |          |          |
|---|----------|----------|----------|
| C | 5.15073  | -0.45521 | 2.21068  |
| H | 7.20921  | 0.14061  | 2.14815  |
| H | 5.30312  | -1.27138 | 2.90771  |
| C | 1.68587  | -0.22346 | 1.27241  |
| C | 2.19113  | 0.94969  | 0.49234  |
| C | 3.67017  | 0.89216  | 0.80064  |
| C | 3.90645  | -0.14223 | 1.69825  |
| H | 4.58448  | 2.49208  | -0.31948 |
| H | 6.84867  | 1.99068  | 0.56334  |
| N | 2.65346  | -0.76487 | 1.95011  |
| H | 2.52321  | -1.54112 | 2.58763  |
| H | 0.65184  | -0.56145 | 1.37925  |
| C | 1.81842  | 0.90358  | -1.00373 |
| H | 0.75864  | 1.14214  | -1.10925 |
| H | 2.38241  | 1.69108  | -1.51495 |
| C | 2.04502  | -0.45182 | -1.69640 |
| H | 1.69948  | -0.34281 | -2.73237 |
| H | 3.99221  | 0.50114  | -3.07896 |
| C | 3.51418  | -0.90041 | -1.67880 |
| O | 3.87261  | -1.82868 | -0.96097 |
| N | 4.35723  | -0.20023 | -2.45523 |
| C | 5.78095  | -0.49160 | -2.46335 |
| H | 6.26555  | 0.13846  | -3.20835 |
| H | 6.21469  | -0.28924 | -1.48007 |
| H | 5.95502  | -1.54131 | -2.70884 |
| H | 1.87903  | -2.29185 | -0.75493 |
| N | 1.30344  | -1.50612 | -1.04178 |
| C | -0.05628 | -1.59994 | -1.10670 |
| O | -0.76013 | -0.72710 | -1.58074 |
| C | 1.55887  | 2.24061  | 1.15731  |
| H | 1.84763  | 2.24892  | 2.21459  |
| H | 2.04963  | 3.09795  | 0.68536  |
| C | 0.07428  | 2.31855  | 0.98678  |
| C | -0.52502 | 3.22398  | 0.20727  |
| C | -4.67698 | 3.40244  | -0.73641 |
| C | -3.88135 | 4.53758  | -0.86164 |
| C | -2.52927 | 4.48038  | -0.55061 |
| C | -1.96273 | 3.28527  | -0.09535 |
| C | -2.77409 | 2.15365  | 0.01868  |
| C | -4.13047 | 2.19604  | -0.29631 |
| H | -5.73161 | 3.45257  | -0.99107 |
| H | -4.31800 | 5.46671  | -1.21213 |
| H | -1.90918 | 5.36601  | -0.65598 |
| H | -2.32112 | 1.21313  | 0.32211  |
| H | -0.52162 | 1.56822  | 1.50463  |
| H | 0.09007  | 3.98970  | -0.26698 |
| C | -4.98496 | 0.95806  | -0.14539 |
| H | -5.09606 | 0.73820  | 0.92434  |
| H | -5.99737 | 1.14876  | -0.51119 |
| C | -4.41725 | -0.27225 | -0.88519 |
| H | -3.32827 | -0.32671 | -0.79247 |
| H | -4.64242 | -0.19371 | -1.94979 |
| C | -3.47409 | -1.58462 | 1.60331  |
| H | -3.58613 | -0.49898 | 1.68829  |
| C | -0.61914 | -2.91103 | -0.53682 |
| N | -4.48661 | -2.14525 | 0.72810  |
| H | -5.05271 | -2.89779 | 1.09823  |
| N | -1.89633 | -2.67221 | 0.08861  |
| H | -2.74088 | -3.04853 | -0.32063 |
| H | 0.07800  | -3.29087 | 0.22085  |
| C | -5.06516 | -1.54571 | -0.38357 |
| O | -6.04256 | -2.04589 | -0.90136 |
| C | -2.04690 | -1.79451 | 1.09124  |
| O | -1.10272 | -1.19577 | 1.61535  |
| C | -3.59764 | -2.18802 | 3.00418  |
| H | -2.82241 | -1.78123 | 3.65460  |

|   |          |          |          |
|---|----------|----------|----------|
| H | -4.57487 | -1.95076 | 3.42986  |
| H | -3.48441 | -3.27612 | 2.96644  |
| C | -0.77283 | -3.93603 | -1.66051 |
| H | -1.16697 | -4.87587 | -1.26687 |
| H | -1.45367 | -3.55549 | -2.42693 |
| H | 0.19225  | -4.13962 | -2.12914 |

Electronic energy = -1738.935518

Zero-point electronic energy = -1738.296163

Enthalpy = -1738.259123

Free energy = -1738.364203

Free energy with quasiharmonic approximation = -1738.356846

Frequencies = 21.1605 27.6667 29.6960 19.5334 27.5609 29.6271

SCF ( $\omega$ B97x-D/6-311+G(d,p)-SMD (nitromethane)) = -1739.434113

**endo-S16a-2**

|   |          |          |          |
|---|----------|----------|----------|
| C | 1.67011  | 1.77407  | -1.21336 |
| C | 2.05380  | 2.48436  | -2.35274 |
| C | 3.35537  | 2.96196  | -2.50625 |
| C | 4.32862  | 2.72967  | -1.53364 |
| H | 3.62257  | 3.51153  | -3.40186 |
| H | 5.34653  | 3.08294  | -1.65574 |
| C | 3.99196  | 0.84470  | 1.50200  |
| C | 2.54095  | 0.87035  | 1.11774  |
| C | 2.62312  | 1.55373  | -0.23055 |
| C | 3.92120  | 2.01718  | -0.42219 |
| H | 0.66349  | 1.38592  | -1.11246 |
| H | 1.32448  | 2.66451  | -3.13439 |
| N | 4.69030  | 1.60274  | 0.70229  |
| H | 5.68019  | 1.77710  | 0.81177  |
| H | 4.39232  | 0.49864  | 2.44394  |
| C | 1.85023  | -0.49777 | 1.10923  |
| H | 1.94877  | -0.96945 | 2.09342  |
| H | 0.78340  | -0.33496 | 0.94573  |
| C | 2.32129  | -1.45345 | 0.00982  |
| H | 2.31641  | -0.91271 | -0.94360 |
| H | 3.35458  | -3.64425 | -0.72015 |
| C | 3.74697  | -1.92802 | 0.24012  |
| O | 4.56439  | -1.20611 | 0.83335  |
| N | 4.07884  | -3.12259 | -0.24859 |
| C | 5.42547  | -3.65751 | -0.13543 |
| H | 5.47790  | -4.59586 | -0.68570 |
| H | 6.14985  | -2.95400 | -0.55129 |
| H | 5.68030  | -3.83997 | 0.91129  |
| H | 1.24617  | -3.12292 | 0.66767  |
| N | 1.40169  | -2.56342 | -0.16269 |
| C | 0.24116  | -2.31067 | -0.87186 |
| O | 0.08910  | -1.31876 | -1.55584 |
| C | 1.84314  | 1.81318  | 2.18217  |
| H | 1.95830  | 1.34837  | 3.16765  |
| H | 2.37338  | 2.77110  | 2.19728  |
| C | 0.39687  | 2.02495  | 1.85547  |
| C | -0.03465 | 3.08053  | 1.15831  |
| C | -3.93471 | 3.71612  | -0.44659 |
| C | -3.03038 | 4.76984  | -0.35374 |
| C | -1.76617 | 4.55960  | 0.18013  |
| C | -1.39288 | 3.29032  | 0.63668  |
| C | -2.31151 | 2.24262  | 0.52889  |
| C | -3.58330 | 2.43983  | -0.00503 |
| H | -4.91925 | 3.88385  | -0.87310 |
| H | -3.31275 | 5.75694  | -0.70434 |
| H | -1.05989 | 5.38227  | 0.24631  |
| H | -2.01921 | 1.24320  | 0.84536  |
| H | -0.29360 | 1.24105  | 2.15712  |
| H | 0.68488  | 3.85999  | 0.90680  |
| C | -4.54944 | 1.28235  | -0.09313 |
| H | -5.51225 | 1.61771  | -0.48790 |

|   |          |          |          |
|---|----------|----------|----------|
| H | -4.75170 | 0.91307  | 0.92016  |
| C | -4.03188 | 0.12820  | -0.97754 |
| H | -2.97948 | -0.08547 | -0.76504 |
| H | -4.10231 | 0.40991  | -2.02930 |
| C | -3.52451 | -1.73734 | 1.25978  |
| H | -3.43773 | -0.67447 | 1.50592  |
| C | -0.80452 | -3.43169 | -0.80451 |
| N | -4.54996 | -1.94741 | 0.25588  |
| H | -5.24725 | -2.65756 | 0.43635  |
| N | -2.06000 | -2.89777 | -0.32305 |
| H | -2.91572 | -3.07936 | -0.82775 |
| H | -0.45510 | -4.20589 | -0.10851 |
| C | -4.89480 | -1.10301 | -0.78471 |
| O | -5.86156 | -1.34674 | -1.47864 |
| C | -2.12429 | -2.16022 | 0.80211  |
| O | -1.12585 | -1.85708 | 1.45393  |
| C | -3.87782 | -2.49420 | 2.54150  |
| H | -3.08840 | -2.35738 | 3.28150  |
| H | -4.81778 | -2.11879 | 2.95195  |
| H | -3.98386 | -3.56540 | 2.34233  |
| C | -0.99210 | -4.03427 | -2.19359 |
| H | -1.29780 | -3.25681 | -2.89751 |
| H | -0.05798 | -4.47535 | -2.54786 |
| H | -1.74998 | -4.82137 | -2.16986 |

Electronic energy = -1738.930536

Zero-point electronic energy = -1738.290076

Enthalpy = -1738.25321

Free energy = -1738.358399

Free energy with quasiharmonic approximation = -1738.350313

Frequencies = 20.4109 22.7503 31.2793 20.1752 22.1862 31.0461

SCF ( $\omega$ B97x-D/6-311+G(d,p)-SMD (nitromethane)) = -1739.427098

#### exo-S16b

|   |          |          |          |
|---|----------|----------|----------|
| C | 0.81462  | 0.70652  | 1.34595  |
| C | 0.64773  | 0.16980  | 2.62335  |
| C | 1.71850  | 0.09870  | 3.51865  |
| C | 2.98747  | 0.55724  | 3.16720  |
| H | 1.56230  | -0.32726 | 4.50322  |
| H | 3.82005  | 0.50574  | 3.86024  |
| C | 4.05905  | 1.87685  | 0.00081  |
| C | 2.60205  | 1.73581  | -0.32072 |
| C | 2.07544  | 1.15257  | 0.97307  |
| C | 3.11985  | 1.06943  | 1.88829  |
| H | -0.02019 | 0.74978  | 0.65485  |
| H | -0.31934 | -0.23301 | 2.90615  |
| N | 4.28597  | 1.58180  | 1.24899  |
| H | 5.19049  | 1.66851  | 1.69410  |
| H | 4.80011  | 2.36923  | -0.61090 |
| C | 2.31183  | 0.89208  | -1.57859 |
| H | 1.23545  | 0.92167  | -1.75840 |
| H | 2.79329  | 1.37286  | -2.43618 |
| C | 2.69905  | -0.59206 | -1.58884 |
| H | 2.44321  | -0.94442 | -2.59552 |
| H | 3.90188  | -2.79280 | -1.70289 |
| C | 4.19823  | -0.82502 | -1.39014 |
| O | 4.96710  | 0.11184  | -1.14657 |
| N | 4.60309  | -2.09636 | -1.49662 |
| C | 5.99029  | -2.51288 | -1.37972 |
| H | 6.09378  | -3.27486 | -0.60406 |
| H | 6.35186  | -2.91488 | -2.32898 |
| H | 6.58551  | -1.64072 | -1.11349 |
| H | 2.32757  | -1.54257 | 0.27171  |
| N | 1.97268  | -1.44995 | -0.66919 |
| C | 0.64775  | -1.74438 | -0.87147 |
| O | 0.03964  | -1.36864 | -1.85732 |
| C | 2.08544  | 3.21373  | -0.54906 |

|   |          |          |          |
|---|----------|----------|----------|
| H | 2.33588  | 3.81023  | 0.33482  |
| H | 2.63603  | 3.62693  | -1.40240 |
| C | 0.61185  | 3.25281  | -0.79702 |
| C | -0.28424 | 3.67289  | 0.10012  |
| C | -4.50101 | 3.24809  | -0.36761 |
| C | -3.98578 | 4.35236  | 0.30781  |
| C | -2.61439 | 4.49858  | 0.47111  |
| C | -1.74024 | 3.55284  | -0.07549 |
| C | -2.27417 | 2.45402  | -0.75299 |
| C | -3.64903 | 2.27962  | -0.89834 |
| H | -5.57573 | 3.12939  | -0.47036 |
| H | -4.66099 | 5.09616  | 0.71771  |
| H | -2.21691 | 5.35396  | 1.00934  |
| H | -1.60505 | 1.69156  | -1.14883 |
| H | 0.26204  | 2.88631  | -1.75915 |
| H | 0.06330  | 4.10773  | 1.03748  |
| C | -4.17184 | 1.00700  | -1.51863 |
| H | -5.23393 | 1.09551  | -1.75869 |
| H | -3.65658 | 0.79231  | -2.45952 |
| C | -3.95898 | -0.15850 | -0.55137 |
| H | -4.50172 | 0.03391  | 0.38278  |
| H | -2.89980 | -0.22839 | -0.27449 |
| C | -3.67037 | -2.59625 | 1.02961  |
| H | -4.14530 | -1.77621 | 1.57717  |
| C | 0.04194  | -2.64534 | 0.20289  |
| N | -4.09269 | -2.60274 | -0.35963 |
| H | -4.51053 | -3.45156 | -0.71744 |
| N | -1.39399 | -2.61872 | 0.12377  |
| H | -1.85097 | -2.77753 | -0.76383 |
| H | 0.29537  | -2.24993 | 1.19254  |
| C | -4.39788 | -1.49215 | -1.12324 |
| O | -4.95194 | -1.60816 | -2.19832 |
| C | -2.16090 | -2.39476 | 1.21872  |
| O | -1.70297 | -2.10940 | 2.31821  |
| C | -4.06338 | -3.91331 | 1.70291  |
| H | -3.73679 | -3.90700 | 2.74346  |
| H | -5.14756 | -4.04392 | 1.67270  |
| H | -3.59170 | -4.76132 | 1.19568  |
| C | 0.58986  | -4.07488 | 0.07251  |
| H | 0.15208  | -4.70177 | 0.85159  |
| H | 0.33294  | -4.49937 | -0.90219 |
| H | 1.67749  | -4.09619 | 0.18393  |

Electronic energy = -1738.924463

Zero-point electronic energy = -1738.284835

Enthalpy = -1738.247625

Free energy = -1738.353741

Free energy with quasiharmonic approximation = -1738.345321

Frequencies = 19.5015 27.7561 30.4260 19.4041 27.7026 30.4214

SCF ( $\omega$ B97x-D/6-311+G(d,p)-SMD (nitromethane)) = -1739.427349

#### endo-S17a

|   |          |          |          |
|---|----------|----------|----------|
| C | -5.26283 | 1.04540  | -1.79876 |
| C | -6.44796 | 0.35163  | -2.05337 |
| C | -6.54230 | -1.00484 | -1.75348 |
| C | -5.46701 | -1.69787 | -1.19530 |
| H | -7.46712 | -1.53564 | -1.95538 |
| H | -5.54758 | -2.75469 | -0.96123 |
| C | -2.05283 | -0.47789 | -0.61406 |
| C | -2.82273 | 0.85322  | -0.84144 |
| C | -4.18801 | 0.36355  | -1.25504 |
| C | -4.29490 | -0.99565 | -0.95410 |
| H | -5.18356 | 2.10363  | -2.03016 |
| H | -7.29648 | 0.86929  | -2.48730 |
| N | -3.10244 | -1.48395 | -0.37663 |
| H | -2.85193 | -2.41838 | -0.67461 |
| H | -1.44768 | -0.75316 | -1.48354 |

|   |          |          |          |
|---|----------|----------|----------|
| C | -2.84376 | 1.49560  | 0.57239  |
| H | -2.72498 | 2.57915  | 0.51934  |
| H | -3.80443 | 1.29556  | 1.05245  |
| C | -1.69481 | 0.85605  | 1.38008  |
| H | -0.87784 | 1.55340  | 1.57193  |
| H | -2.85905 | -1.33608 | 1.87185  |
| C | -2.19662 | 0.38247  | 2.74793  |
| O | -2.15245 | 1.12514  | 3.71454  |
| N | -2.73882 | -0.86206 | 2.75935  |
| C | -3.38245 | -1.39248 | 3.93904  |
| H | -3.01462 | -0.83632 | 4.80164  |
| H | -3.13972 | -2.45121 | 4.06182  |
| H | -4.47224 | -1.28174 | 3.89407  |
| N | -1.20524 | -0.22695 | 0.52833  |
| C | 0.04726  | -0.71397 | 0.75994  |
| O | 0.74295  | -0.28792 | 1.66906  |
| C | -2.12778 | 1.76044  | -1.88251 |
| H | -2.25950 | 1.31449  | -2.87482 |
| H | -2.64207 | 2.72784  | -1.89232 |
| C | -0.66881 | 1.94358  | -1.57919 |
| C | -0.15172 | 2.95383  | -0.87678 |
| C | 3.85811  | 3.01807  | 0.58251  |
| C | 2.83479  | 3.63173  | 1.29684  |
| C | 1.53937  | 3.64500  | 0.79591  |
| C | 1.24795  | 3.02537  | -0.42321 |
| C | 2.29239  | 2.43953  | -1.14390 |
| C | 3.59738  | 2.42683  | -0.65489 |
| H | 4.86415  | 2.97916  | 0.98610  |
| H | 3.04627  | 4.09376  | 2.25564  |
| H | 0.73982  | 4.11183  | 1.36475  |
| H | 2.08640  | 1.99725  | -2.11657 |
| H | -0.00941 | 1.12683  | -1.87204 |
| H | -0.81107 | 3.75356  | -0.53800 |
| C | 4.69445  | 1.75945  | -1.45286 |
| H | 4.60565  | 2.04862  | -2.50541 |
| H | 5.67178  | 2.09497  | -1.09828 |
| C | 4.63845  | 0.23171  | -1.36909 |
| H | 5.31831  | -0.20871 | -2.11053 |
| H | 3.63283  | -0.12635 | -1.61431 |
| C | 4.24417  | -2.58835 | -0.63876 |
| H | 4.69429  | -2.42674 | -1.62372 |
| C | 0.53892  | -1.88270 | -0.09205 |
| N | 4.70926  | -1.57954 | 0.29652  |
| H | 5.08214  | -1.89492 | 1.18162  |
| N | 1.98082  | -1.87116 | -0.02108 |
| H | 2.39770  | -1.33323 | 0.72947  |
| H | 0.25554  | -1.78022 | -1.14400 |
| C | 5.05396  | -0.28242 | 0.00111  |
| O | 5.66419  | 0.39824  | 0.80664  |
| C | 2.72767  | -2.58936 | -0.88243 |
| O | 2.25536  | -3.25151 | -1.79913 |
| C | 4.65235  | -3.97879 | -0.14881 |
| H | 4.29387  | -4.73076 | -0.85256 |
| H | 5.73949  | -4.05312 | -0.06593 |
| H | 4.20850  | -4.18321 | 0.83132  |
| C | -0.03799 | -3.19599 | 0.45922  |
| H | 0.31898  | -4.02696 | -0.15151 |
| H | 0.29112  | -3.33352 | 1.49236  |
| H | -1.13127 | -3.18905 | 0.45392  |

Electronic energy = -1738.545204

Zero-point electronic energy = -1737.917456

Enthalpy = -1737.881177

Free energy = -1737.985514

Free energy with quasiharmonic approximation = -1737.977293

Frequencies = 24.5910 28.6105 31.2155 24.4002 28.5094 31.1584

SCF ( $\omega$ B97x-D/6-311+G(d,p)-SMD (nitromethane)) = -1738.993872



exo-S17b

|   |          |          |          |
|---|----------|----------|----------|
| C | 5.80838  | 0.49731  | 0.01094  |
| C | 6.94395  | -0.25664 | -0.29519 |
| C | 6.80938  | -1.48682 | -0.93403 |
| C | 5.55535  | -1.99498 | -1.27385 |
| H | 7.69612  | -2.06590 | -1.17256 |
| H | 5.45726  | -2.95840 | -1.76351 |
| C | 2.26425  | -0.38987 | -0.87592 |
| C | 3.19257  | 0.62284  | -0.13962 |
| C | 4.56063  | 0.00796  | -0.33293 |
| C | 4.43447  | -1.23237 | -0.96438 |
| H | 5.90622  | 1.46118  | 0.50334  |
| H | 7.92917  | 0.11813  | -0.03996 |
| N | 3.09379  | -1.54917 | -1.17471 |
| H | 2.84279  | -2.07717 | -1.99675 |
| H | 1.80370  | -0.00072 | -1.78527 |
| C | 2.71576  | 0.59762  | 1.33659  |
| H | 3.54021  | 0.40297  | 2.02309  |
| H | 2.27932  | 1.56367  | 1.60093  |
| C | 1.63042  | -0.49416 | 1.45890  |
| H | 2.04307  | -1.40868 | 1.89645  |
| H | -0.34440 | 1.00659  | 0.87370  |
| C | 0.51379  | -0.03119 | 2.40348  |
| O | 0.52258  | -0.37144 | 3.57558  |
| N | -0.41037 | 0.78812  | 1.85527  |
| C | -1.57392 | 1.23747  | 2.59369  |
| H | -1.27696 | 1.49744  | 3.61120  |
| H | -1.98546 | 2.11816  | 2.09650  |
| H | -2.33185 | 0.44847  | 2.64280  |
| N | 1.20635  | -0.70770 | 0.07582  |
| C | 0.19011  | -1.50910 | -0.35554 |
| O | -0.03272 | -1.66510 | -1.55276 |
| C | 3.10451  | 2.05733  | -0.73260 |
| H | 3.64277  | 2.73898  | -0.06453 |
| H | 3.62779  | 2.06473  | -1.69435 |
| C | 1.68342  | 2.49470  | -0.91467 |
| C | 0.97579  | 3.24547  | -0.06646 |
| C | -3.26045 | 3.81117  | -0.20765 |
| C | -2.45820 | 4.68472  | 0.52245  |
| C | -1.07982 | 4.51210  | 0.55648  |
| C | -0.47945 | 3.46706  | -0.15470 |
| C | -1.30400 | 2.59934  | -0.87939 |
| C | -2.68872 | 2.75416  | -0.91677 |
| H | -4.33830 | 3.94619  | -0.22042 |
| H | -2.91293 | 5.50188  | 1.07333  |
| H | -0.46055 | 5.18799  | 1.13910  |
| H | -0.86529 | 1.75618  | -1.41017 |
| H | 1.17744  | 2.08666  | -1.78756 |
| H | 1.47606  | 3.70444  | 0.78611  |
| C | -3.52379 | 1.75368  | -1.67830 |
| H | -4.54603 | 2.12269  | -1.80131 |
| H | -3.12383 | 1.61468  | -2.68647 |
| C | -3.54703 | 0.39308  | -0.97916 |
| H | -4.07779 | 0.45917  | -0.02224 |
| H | -2.52495 | 0.08061  | -0.73001 |
| C | -4.41498 | -2.19830 | 0.14931  |
| H | -5.05286 | -1.46400 | 0.65428  |
| C | -0.63884 | -2.28921 | 0.66541  |
| N | -4.33026 | -1.92630 | -1.27604 |
| H | -4.77934 | -2.58236 | -1.90064 |
| N | -1.97825 | -2.41285 | 0.13636  |
| H | -2.06826 | -2.49166 | -0.86878 |
| H | -0.73080 | -1.78880 | 1.62878  |
| C | -4.14198 | -0.69322 | -1.86050 |
| O | -4.38874 | -0.52214 | -3.04083 |

|   |          |          |          |
|---|----------|----------|----------|
| C | -3.06842 | -2.12051 | 0.88126  |
| O | -3.03841 | -1.86408 | 2.07662  |
| C | -5.00974 | -3.58972 | 0.36936  |
| H | -5.07584 | -3.79290 | 1.43930  |
| H | -6.01298 | -3.65173 | -0.06147 |
| H | -4.37692 | -4.35380 | -0.09254 |
| C | 0.02764  | -3.65544 | 0.87404  |
| H | 0.08955  | -4.19484 | -0.07497 |
| H | 1.03896  | -3.53941 | 1.27443  |
| H | -0.56218 | -4.23997 | 1.58269  |

Electronic energy = -1738.549453

Zero-point electronic energy = -1737.922092

Enthalpy = -1737.885601

Free energy = -1737.989463

Free energy with quasiharmonic approximation = -1737.98221

Frequencies = 22.8308 28.1311 34.0100 22.6648 28.0433 33.944

SCF ( $\omega$ B97x-D/6-311+G(d,p)-SMD (nitromethane)) = -1738.991441

**endo-TS-1a**

|   |          |          |          |
|---|----------|----------|----------|
| C | -0.80996 | 2.31968  | 1.03054  |
| C | -0.65629 | 3.41859  | 0.18236  |
| C | -0.19357 | 3.26089  | -1.12405 |
| C | 0.11689  | 1.99843  | -1.63285 |
| H | -0.07807 | 4.13127  | -1.76027 |
| H | 0.47375  | 1.87105  | -2.64908 |
| C | -0.22269 | -1.18370 | 0.01070  |
| C | -0.47791 | -0.29706 | 1.21175  |
| C | -0.49662 | 1.06356  | 0.54037  |
| C | -0.04852 | 0.93061  | -0.77081 |
| H | -1.18806 | 2.44935  | 2.03868  |
| H | -0.90002 | 4.41034  | 0.54611  |
| N | 0.17675  | -0.44982 | -1.01401 |
| H | 0.62265  | -0.81115 | -1.84407 |
| H | 0.08002  | -2.22039 | 0.08974  |
| C | -1.75670 | -0.70110 | 1.94874  |
| H | -1.57748 | -1.63690 | 2.48733  |
| H | -2.04734 | 0.05872  | 2.67637  |
| C | -2.88072 | -0.90211 | 0.93258  |
| H | -3.68946 | -1.46621 | 1.40990  |
| H | -3.05402 | 0.21182  | -1.39818 |
| C | -3.50395 | 0.46268  | 0.56296  |
| O | -3.90873 | 1.17636  | 1.46322  |
| N | -3.59709 | 0.76194  | -0.75274 |
| C | -4.06855 | 2.06512  | -1.18912 |
| H | -4.80486 | 2.42123  | -0.46945 |
| H | -4.53500 | 1.97502  | -2.17106 |
| H | -3.24821 | 2.78828  | -1.23680 |
| N | -2.28956 | -1.64016 | -0.17108 |
| C | -2.98206 | -2.44061 | -0.89782 |
| C | -4.45312 | -2.69140 | -0.78370 |
| H | -4.99575 | -1.74332 | -0.77925 |
| H | -4.79129 | -3.30787 | -1.61499 |
| H | -4.66914 | -3.21200 | 0.15402  |
| C | 0.75947  | -0.41646 | 2.16865  |
| H | 0.53648  | 0.22109  | 3.03093  |
| H | 0.81459  | -1.44777 | 2.53526  |
| C | 2.05272  | -0.01240 | 1.52543  |
| C | 2.96962  | -0.88626 | 1.10020  |
| C | 6.60417  | -0.02739 | -0.97902 |
| C | 6.42187  | -1.25391 | -0.34822 |
| C | 5.23225  | -1.52188 | 0.31952  |
| C | 4.21050  | -0.56763 | 0.37582  |
| C | 4.39972  | 0.65699  | -0.27874 |
| C | 5.58829  | 0.92577  | -0.94420 |
| H | 7.53205  | 0.18439  | -1.49954 |
| H | 7.20657  | -2.00239 | -0.37377 |

|   |          |          |          |
|---|----------|----------|----------|
| H | 5.09767  | -2.47886 | 0.81661  |
| H | 3.60910  | 1.40189  | -0.27877 |
| H | 5.72326  | 1.88049  | -1.44190 |
| H | 2.20446  | 1.05399  | 1.37800  |
| H | 2.80998  | -1.94631 | 1.30779  |
| O | -2.40786 | -3.14138 | -1.87113 |
| H | -1.45893 | -2.97182 | -1.89212 |

Electronic energy = -1206.259324

Zero-point electronic energy = -1205.800186

Enthalpy = -1205.774216

Free energy = -1205.85643

Free energy with quasiharmonic approximation = -1205.850854

Frequencies = -105.5577 15.9972 24.8230 -105.5538 15.7851 24.6182

SCF ( $\omega$ B97x-D/6-311+G(d,p)-SMD (nitromethane)) = -1206.624359

#### exo-TS-1b

|   |          |          |          |
|---|----------|----------|----------|
| C | 0.21651  | 1.32591  | -2.06797 |
| C | 0.89194  | 2.54708  | -2.01779 |
| C | 1.41602  | 3.02888  | -0.81800 |
| C | 1.27180  | 2.31529  | 0.37245  |
| H | 1.94213  | 3.97681  | -0.80605 |
| H | 1.68325  | 2.68582  | 1.30470  |
| C | -0.48721 | -0.78346 | 0.87967  |
| C | -0.49835 | -0.77267 | -0.63565 |
| C | 0.06792  | 0.60757  | -0.89343 |
| C | 0.58727  | 1.11716  | 0.29287  |
| H | -0.17476 | 0.94921  | -3.00786 |
| H | 1.01476  | 3.12719  | -2.92540 |
| N | 0.29935  | 0.18665  | 1.32435  |
| H | 0.63521  | 0.27467  | 2.27168  |
| H | -0.63837 | -1.67639 | 1.47269  |
| C | -1.90530 | -1.01601 | -1.17437 |
| H | -2.19287 | -2.05593 | -0.98110 |
| H | -1.95461 | -0.85649 | -2.25296 |
| C | -2.86112 | -0.06712 | -0.44821 |
| H | -2.73347 | 0.93980  | -0.86296 |
| H | -4.47076 | -1.39932 | 1.04564  |
| C | -4.31325 | -0.46230 | -0.75471 |
| O | -4.76898 | -0.18678 | -1.84883 |
| N | -4.98019 | -1.12309 | 0.22157  |
| C | -6.31700 | -1.65289 | 0.01331  |
| H | -6.94750 | -1.43611 | 0.87792  |
| H | -6.73455 | -1.16968 | -0.86943 |
| H | -6.29438 | -2.73336 | -0.15549 |
| N | -2.45644 | -0.10545 | 0.95024  |
| C | -2.83379 | 0.81353  | 1.76881  |
| C | -3.73135 | 1.96610  | 1.46395  |
| H | -3.35581 | 2.52122  | 0.60038  |
| H | -3.80276 | 2.62712  | 2.32604  |
| H | -4.72724 | 1.59207  | 1.20850  |
| C | 0.50058  | -1.87229 | -1.15421 |
| H | 0.03684  | -2.85175 | -0.99776 |
| H | 0.57625  | -1.72115 | -2.23528 |
| C | 1.85583  | -1.81316 | -0.50755 |
| C | 2.83625  | -1.01062 | -0.93150 |
| C | 6.59849  | -0.32404 | 0.96736  |
| C | 6.03102  | 0.64351  | 0.14347  |
| C | 4.81475  | 0.39648  | -0.48285 |
| C | 4.14300  | -0.81545 | -0.28576 |
| C | 4.72941  | -1.78617 | 0.53543  |
| C | 5.94686  | -1.54091 | 1.15760  |
| H | 7.55269  | -0.13806 | 1.44879  |
| H | 6.53963  | 1.58841  | -0.01691 |
| H | 4.37292  | 1.15159  | -1.12798 |
| H | 4.24623  | -2.75031 | 0.66323  |
| H | 6.39660  | -2.30567 | 1.78222  |

|   |          |          |          |
|---|----------|----------|----------|
| H | 1.99880  | -2.41181 | 0.39048  |
| H | 2.65236  | -0.39318 | -1.81096 |
| O | -2.41369 | 0.78014  | 3.02982  |
| H | -1.95998 | -0.05495 | 3.19925  |

Electronic energy = -1206.255067  
Zero-point electronic energy = -1205.796521  
Enthalpy = -1205.770159  
Free energy = -1205.854413  
Free energy with quasiharmonic approximation = -1205.847407  
Frequencies = -131.4952 20.4898 24.2649 -131.4931 20.1645 23.7061  
SCF ( $\omega$ B97x-D/6-311+G(d,p)-SMD (nitromethane)) = -1206.621767

**endo-TS-2a**

|   |          |          |          |
|---|----------|----------|----------|
| C | -0.37530 | 2.37230  | 0.01152  |
| C | 0.65410  | 3.24023  | 0.34921  |
| C | 1.95626  | 3.05850  | -0.14144 |
| C | 2.26894  | 2.00066  | -0.98418 |
| H | 2.73322  | 3.76089  | 0.13977  |
| H | 3.27457  | 1.85350  | -1.36215 |
| C | 0.01954  | -0.54140 | -2.16966 |
| C | -0.86586 | 0.17885  | -1.35028 |
| C | -0.08447 | 1.29945  | -0.83788 |
| C | 1.22829  | 1.14025  | -1.31368 |
| H | -1.37068 | 2.53506  | 0.41352  |
| H | 0.44532  | 4.07905  | 1.00371  |
| N | 1.24564  | -0.00353 | -2.11874 |
| H | 2.04961  | -0.33976 | -2.62600 |
| H | -0.20675 | -1.40553 | -2.77921 |
| C | -2.36199 | 0.15763  | -1.58170 |
| H | -2.64720 | 1.18095  | -1.85001 |
| H | -2.56908 | -0.47548 | -2.44601 |
| C | -3.30493 | -0.30451 | -0.46171 |
| H | -4.32102 | -0.18366 | -0.85181 |
| H | -3.96230 | -1.55095 | 1.61851  |
| C | -3.15773 | -1.81790 | -0.21613 |
| O | -2.68744 | -2.54287 | -1.08521 |
| N | -3.58396 | -2.24336 | 0.98879  |
| C | -3.61471 | -3.64578 | 1.35933  |
| H | -3.10139 | -3.80101 | 2.31117  |
| H | -3.10938 | -4.20983 | 0.57585  |
| H | -4.64337 | -4.00514 | 1.44674  |
| H | -2.31565 | 0.48847  | 1.21942  |
| N | -3.21830 | 0.47373  | 0.75831  |
| C | -3.87603 | 1.67808  | 0.98006  |
| O | -3.39126 | 2.48923  | 1.74526  |
| C | -5.18928 | 1.89813  | 0.26795  |
| H | -5.85950 | 1.04051  | 0.37093  |
| H | -5.65827 | 2.78089  | 0.69890  |
| H | -5.02721 | 2.07804  | -0.79986 |
| C | -0.17867 | -1.41263 | 0.23532  |
| H | -1.06833 | -1.15104 | 0.79128  |
| H | -0.27643 | -2.31868 | -0.35219 |
| C | 1.06548  | -0.96954 | 0.69798  |
| C | 2.22772  | -1.47800 | 0.17920  |
| C | 6.22027  | -0.26898 | 0.91908  |
| C | 5.17235  | 0.46881  | 1.47061  |
| C | 3.85938  | 0.08655  | 1.24741  |
| C | 3.57609  | -1.04917 | 0.46395  |
| C | 4.64454  | -1.77741 | -0.09111 |
| C | 5.95628  | -1.39302 | 0.13792  |
| H | 7.24643  | 0.03273  | 1.10012  |
| H | 5.38496  | 1.34315  | 2.07576  |
| H | 3.05389  | 0.67503  | 1.67220  |
| H | 4.43577  | -2.65769 | -0.69307 |
| H | 6.77321  | -1.96504 | -0.28731 |
| H | 1.08964  | -0.15698 | 1.41630  |

H 2.13422 -2.31268 -0.51596  
 Electronic energy = -1206.241391  
 Zero-point electronic energy = -1205.783924  
 Enthalpy = -1205.757261  
 Free energy = -1205.840946  
 Free energy with quasiharmonic approximation = -1205.835262  
 Frequencies = -163.9362 20.1600 26.8721 -163.9346 18.3189 26.6842  
 SCF ( $\omega$ B97x-D/6-311+G(d,p)–SMD (nitromethane)) = -1206.600955

**exo-TS-2b**

|   |          |          |          |
|---|----------|----------|----------|
| C | -0.88818 | 2.56401  | -0.47963 |
| C | -2.16825 | 3.04645  | -0.68008 |
| C | -3.14464 | 2.27200  | -1.33845 |
| C | -2.86601 | 0.99685  | -1.79699 |
| H | -4.13483 | 2.68681  | -1.49203 |
| H | -3.62072 | 0.39741  | -2.29392 |
| C | 0.28032  | -0.74121 | -1.51215 |
| C | 0.61489  | 0.46230  | -0.87860 |
| C | -0.57300 | 1.27470  | -0.94105 |
| C | -1.57686 | 0.51367  | -1.57338 |
| H | -0.14302 | 3.17987  | 0.01408  |
| H | -2.42440 | 4.04389  | -0.34020 |
| N | -1.00963 | -0.70667 | -1.91175 |
| H | -1.48717 | -1.46456 | -2.37175 |
| H | 0.91075  | -1.60053 | -1.68761 |
| C | 1.97905  | 1.02845  | -0.57098 |
| H | 1.83128  | 1.96593  | -0.02582 |
| H | 2.44645  | 1.30478  | -1.52557 |
| C | 3.01946  | 0.22518  | 0.24169  |
| H | 2.58655  | -0.04860 | 1.20802  |
| H | 5.13466  | -0.31781 | -1.00357 |
| C | 3.38055  | -1.11139 | -0.43124 |
| O | 2.59725  | -2.06112 | -0.36811 |
| N | 4.55315  | -1.14052 | -1.07812 |
| C | 5.05548  | -2.31937 | -1.75801 |
| H | 5.98913  | -2.65742 | -1.30226 |
| H | 4.30715  | -3.10583 | -1.66586 |
| H | 5.23033  | -2.10762 | -2.81554 |
| H | 4.20974  | 1.96221  | -0.06346 |
| N | 4.16275  | 1.09024  | 0.44737  |
| C | 5.05307  | 1.04831  | 1.51224  |
| O | 5.86503  | 1.93709  | 1.65291  |
| C | 4.95359  | -0.14606 | 2.43432  |
| H | 4.03215  | -0.10306 | 3.02450  |
| H | 4.95707  | -1.09117 | 1.88370  |
| H | 5.80266  | -0.11762 | 3.11483  |
| C | 0.02908  | -0.95408 | 1.06915  |
| H | 0.85174  | -1.64943 | 0.92424  |
| H | 0.26072  | -0.00353 | 1.53858  |
| C | -1.29801 | -1.35183 | 0.97537  |
| C | -2.30694 | -0.43742 | 1.19411  |
| C | -6.48833 | -0.88170 | 0.77507  |
| C | -5.93626 | 0.36194  | 1.07006  |
| C | -4.56271 | 0.48485  | 1.21791  |
| C | -3.72341 | -0.63496 | 1.06403  |
| C | -4.29907 | -1.88644 | 0.76494  |
| C | -5.66969 | -2.00541 | 0.62592  |
| H | -7.56269 | -0.98324 | 0.66398  |
| H | -6.57663 | 1.22850  | 1.18976  |
| H | -4.12176 | 1.45042  | 1.44561  |
| H | -3.67466 | -2.76721 | 0.65854  |
| H | -6.11164 | -2.97095 | 0.40713  |
| H | -1.51944 | -2.36062 | 0.64357  |
| H | -2.00028 | 0.56715  | 1.48446  |

Electronic energy = -1206.243785  
 Zero-point electronic energy = -1205.786809

Enthalpy = -1205.759795  
Free energy = -1205.844962  
Free energy with quasiharmonic approximation = -1205.838393  
Frequencies = -46.9291 17.1590 20.5421 -46.8605 16.7567 19.7092  
SCF ( $\omega$ B97x-D/6-311+G(d,p)–SMD (nitromethane)) = -1206.602557

**endo-TS-3a**

|   |          |          |          |
|---|----------|----------|----------|
| C | 0.61426  | 1.60939  | 0.29633  |
| C | 1.68252  | 2.20851  | -0.32260 |
| C | 2.30190  | 1.62084  | -1.45692 |
| C | 1.85428  | 0.43870  | -2.00578 |
| H | 3.14870  | 2.12472  | -1.91058 |
| H | 2.32636  | 0.00427  | -2.87967 |
| C | -0.80006 | -1.62013 | -0.68873 |
| C | -0.87286 | -0.51897 | 0.18245  |
| C | 0.14322  | 0.37627  | -0.22069 |
| C | 0.77325  | -0.18386 | -1.36873 |
| H | 0.10324  | 2.07201  | 1.13322  |
| H | 2.06354  | 3.15229  | 0.05072  |
| N | 0.13080  | -1.35295 | -1.66840 |
| H | 0.36361  | -1.97362 | -2.42570 |
| H | -1.54050 | -2.39847 | -0.83233 |
| C | -1.86326 | -0.36052 | 1.29481  |
| H | -2.08214 | -1.33984 | 1.73452  |
| H | -1.46319 | 0.28372  | 2.08019  |
| C | -3.20081 | 0.25060  | 0.81503  |
| H | -3.92138 | 0.16018  | 1.63477  |
| H | -4.54878 | 1.66068  | -0.77576 |
| C | -3.04632 | 1.76270  | 0.57303  |
| O | -2.23135 | 2.40785  | 1.21973  |
| N | -3.88303 | 2.28380  | -0.34348 |
| C | -3.93933 | 3.70458  | -0.62930 |
| H | -4.85297 | 4.15130  | -0.22749 |
| H | -3.90039 | 3.87552  | -1.70733 |
| H | -3.07860 | 4.17613  | -0.15627 |
| H | -3.17956 | -0.33626 | -1.18310 |
| N | -3.74395 | -0.43472 | -0.34546 |
| C | -4.26236 | -1.72188 | -0.27485 |
| O | -4.07341 | -2.50449 | -1.18836 |
| C | -5.07148 | -2.07083 | 0.95214  |
| H | -4.42222 | -2.20369 | 1.82403  |
| H | -5.79838 | -1.29016 | 1.18985  |
| H | -5.58779 | -3.01029 | 0.76198  |
| C | 0.50292  | -2.70787 | 0.87758  |
| H | 0.06146  | -2.29781 | 1.77867  |
| H | 0.08065  | -3.64528 | 0.53284  |
| C | 1.79374  | -2.33827 | 0.50727  |
| C | 2.37680  | -1.21228 | 1.05068  |
| C | 6.05286  | 0.66414  | 0.12718  |
| C | 5.68628  | -0.48834 | -0.57300 |
| C | 4.49108  | -1.12320 | -0.28572 |
| C | 3.64101  | -0.61635 | 0.71736  |
| C | 4.02209  | 0.55069  | 1.40484  |
| C | 5.22055  | 1.18497  | 1.11413  |
| H | 6.99357  | 1.15463  | -0.09980 |
| H | 6.34210  | -0.88733 | -1.33879 |
| H | 4.21964  | -2.01989 | -0.83262 |
| H | 3.36550  | 0.95498  | 2.16915  |
| H | 5.50749  | 2.08000  | 1.65444  |
| H | 2.28927  | -2.88885 | -0.28541 |
| H | 1.82060  | -0.71209 | 1.84183  |

Electronic energy = -1206.247976  
Zero-point electronic energy = -1205.790976  
Enthalpy = -1205.763991  
Free energy = -1205.84912  
Free energy with quasiharmonic approximation = -1205.842646

Frequencies = -183.9717 20.6420 24.0857 -183.9699 19.3061 23.9699  
SCF ( $\omega$ B97x-D/6-311+G(d,p)-SMD (nitromethane)) = -1206.605127

**exo-TS-3b**

|   |          |          |          |
|---|----------|----------|----------|
| C | 0.35249  | 1.43927  | 0.32179  |
| C | 1.34110  | 1.86757  | 1.17296  |
| C | 2.05123  | 0.95328  | 1.99246  |
| C | 1.77453  | -0.39720 | 1.99265  |
| H | 2.82866  | 1.33210  | 2.64709  |
| H | 2.31904  | -1.08562 | 2.62879  |
| C | -0.64136 | -2.05874 | -0.11058 |
| C | -0.86466 | -0.71996 | -0.47163 |
| C | 0.04952  | 0.05540  | 0.28033  |
| C | 0.77170  | -0.83791 | 1.12063  |
| H | -0.20894 | 2.15160  | -0.27309 |
| H | 1.57826  | 2.92339  | 1.23415  |
| N | 0.28288  | -2.09937 | 0.90506  |
| H | 0.60459  | -2.93757 | 1.35960  |
| H | -1.29615 | -2.89334 | -0.31935 |
| C | -1.90707 | -0.25059 | -1.43596 |
| H | -2.15660 | -1.05260 | -2.13364 |
| H | -1.53257 | 0.60282  | -2.01185 |
| C | -3.21469 | 0.18112  | -0.73533 |
| H | -3.92329 | 0.46846  | -1.51852 |
| H | -4.77991 | 0.26877  | 1.22427  |
| C | -3.85688 | -1.02367 | -0.02178 |
| O | -3.63486 | -2.16335 | -0.41517 |
| N | -4.67298 | -0.70945 | 0.99992  |
| C | -5.43535 | -1.70279 | 1.73128  |
| H | -5.22760 | -1.63416 | 2.80183  |
| H | -6.50752 | -1.56789 | 1.56657  |
| H | -5.14157 | -2.68650 | 1.36636  |
| H | -2.42539 | 1.16447  | 0.93980  |
| N | -3.04433 | 1.31486  | 0.15026  |
| C | -2.99579 | 2.63710  | -0.27030 |
| O | -2.36380 | 3.45401  | 0.37111  |
| C | -3.77839 | 2.99651  | -1.51329 |
| H | -3.31085 | 2.57628  | -2.40983 |
| H | -4.80616 | 2.62672  | -1.46332 |
| H | -3.78618 | 4.08142  | -1.60277 |
| C | 0.68405  | -2.17577 | -1.98058 |
| H | 0.32493  | -3.18935 | -2.12035 |
| H | 0.22209  | -1.43039 | -2.61775 |
| C | 1.95426  | -1.94213 | -1.44948 |
| C | 2.46743  | -0.66566 | -1.41065 |
| C | 5.97873  | 0.79728  | 0.44515  |
| C | 5.69100  | -0.56843 | 0.51846  |
| C | 4.55501  | -1.07203 | -0.08964 |
| C | 3.68504  | -0.21394 | -0.79008 |
| C | 3.98570  | 1.15847  | -0.84693 |
| C | 5.12642  | 1.66053  | -0.23655 |
| H | 6.87303  | 1.18534  | 0.92115  |
| H | 6.36084  | -1.23438 | 1.05095  |
| H | 4.34624  | -2.13480 | -0.02735 |
| H | 3.31356  | 1.82828  | -1.37452 |
| H | 5.35123  | 2.71957  | -0.29422 |
| H | 2.47882  | -2.76410 | -0.97375 |
| H | 1.88770  | 0.10766  | -1.91207 |

Electronic energy = -1206.249609

Zero-point electronic energy = -1205.792502

Enthalpy = -1205.765618

Free energy = -1205.850501

Free energy with quasiharmonic approximation = -1205.843929

Frequencies = -184.8306 17.4524 21.0985 -184.8301 15.7357 20.9413

SCF ( $\omega$ B97x-D/6-311+G(d,p)-SMD (nitromethane)) = -1206.607549

**endo-TS-4a**

|   |          |          |          |
|---|----------|----------|----------|
| C | -3.38162 | -1.74318 | -1.42529 |
| C | -4.61838 | -2.32287 | -1.22461 |
| C | -5.13545 | -2.49005 | 0.07520  |
| C | -4.43757 | -2.08525 | 1.20035  |
| H | -6.10981 | -2.95027 | 0.19820  |
| H | -4.84575 | -2.21785 | 2.19574  |
| C | -1.17443 | -0.54920 | 1.24548  |
| C | -1.37440 | -0.68195 | -0.15221 |
| C | -2.65621 | -1.32004 | -0.30173 |
| C | -3.19339 | -1.49244 | 0.98882  |
| H | -2.98263 | -1.62019 | -2.42696 |
| H | -5.20273 | -2.65776 | -2.07376 |
| N | -2.28232 | -0.99005 | 1.89947  |
| H | -2.40598 | -0.95463 | 2.89808  |
| H | -0.44417 | 0.07689  | 1.73525  |
| C | -0.61343 | 0.00002  | -1.24971 |
| H | 0.29822  | -0.55703 | -1.50394 |
| H | -1.23809 | 0.00174  | -2.14621 |
| C | -0.20193 | 1.45753  | -0.92633 |
| H | 0.18207  | 1.89490  | -1.85993 |
| H | -1.52075 | 3.16107  | -2.28089 |
| C | -1.45696 | 2.22732  | -0.46936 |
| O | -1.92623 | 2.06608  | 0.64904  |
| N | -2.01211 | 3.01399  | -1.41347 |
| C | -3.22511 | 3.77567  | -1.17076 |
| H | -3.00042 | 4.83093  | -0.99276 |
| H | -3.70831 | 3.36450  | -0.28546 |
| H | -3.89805 | 3.69078  | -2.02603 |
| H | 1.38680  | 0.58204  | 0.11646  |
| N | 0.81801  | 1.41804  | 0.09206  |
| C | 1.35679  | 2.43166  | 0.85879  |
| O | 2.25561  | 2.16246  | 1.63692  |
| C | 0.78724  | 3.82034  | 0.71575  |
| H | -0.15677 | 3.88931  | 1.26295  |
| H | 1.50007  | 4.52239  | 1.14523  |
| H | 0.59628  | 4.08448  | -0.32821 |
| C | -0.03200 | -2.14229 | 0.69609  |
| H | -0.45623 | -2.64062 | 1.56333  |
| H | -0.28460 | -2.67779 | -0.21632 |
| C | 1.34645  | -1.69776 | 0.78439  |
| C | 2.21406  | -1.83605 | -0.24502 |
| C | 6.28370  | -0.61684 | -0.40214 |
| C | 5.80115  | -1.58044 | -1.28492 |
| C | 4.46767  | -1.96080 | -1.23022 |
| C | 3.60507  | -1.39721 | -0.27806 |
| C | 4.09806  | -0.41658 | 0.59818  |
| C | 5.42912  | -0.03093 | 0.52993  |
| H | 7.32425  | -0.31350 | -0.44961 |
| H | 6.46350  | -2.02988 | -2.01663 |
| H | 4.09101  | -2.71086 | -1.92039 |
| H | 3.44149  | 0.09272  | 1.29830  |
| H | 5.79691  | 0.73671  | 1.20171  |
| H | 1.68114  | -1.25819 | 1.72074  |
| H | 1.86192  | -2.35409 | -1.13882 |

Electronic energy = -1206.234977

Zero-point electronic energy = -1205.777476

Enthalpy = -1205.750778

Free energy = -1205.834634

Free energy with quasiharmonic approximation = -1205.828743

Frequencies = -376.2497 24.4078 29.3241 -376.2487 24.0023 29.2599

SCF ( $\omega$ B97x-D/6-311+G(d,p)-SMD (nitromethane)) = -1206.595886**exo-TS-4b**

|   |          |          |         |
|---|----------|----------|---------|
| C | -3.85106 | -0.40460 | 1.77292 |
| C | -5.20189 | -0.67632 | 1.86433 |



|   |          |          |          |
|---|----------|----------|----------|
| C | -5.94380 | -1.04412 | 0.72463  |
| C | -5.36293 | -1.14781 | -0.52822 |
| H | -7.00320 | -1.24975 | 0.83250  |
| H | -5.94345 | -1.43001 | -1.39912 |
| C | -1.88989 | -0.57338 | -1.31773 |
| C | -1.88938 | -0.27727 | 0.06667  |
| C | -3.24074 | -0.49729 | 0.51360  |
| C | -4.00163 | -0.86084 | -0.61425 |
| H | -3.28007 | -0.12424 | 2.65210  |
| H | -5.70308 | -0.60736 | 2.82270  |
| N | -3.15917 | -0.86465 | -1.71286 |
| H | -3.42904 | -1.07043 | -2.66088 |
| H | -1.13263 | -0.29601 | -2.03478 |
| C | -0.81710 | 0.37665  | 0.88078  |
| H | -1.31801 | 1.07642  | 1.55985  |
| H | -0.33520 | -0.37649 | 1.51774  |
| C | 0.30419  | 1.12641  | 0.13404  |
| H | 0.75679  | 0.44779  | -0.59413 |
| H | 0.56411  | 3.59838  | 0.58288  |
| C | -0.27429 | 2.28757  | -0.69780 |
| O | -0.92678 | 2.03546  | -1.70682 |
| N | -0.02743 | 3.52160  | -0.23139 |
| C | -0.49245 | 4.72275  | -0.89906 |
| H | -1.06062 | 4.41896  | -1.77779 |
| H | -1.13618 | 5.30730  | -0.23738 |
| H | 0.35246  | 5.34064  | -1.21279 |
| H | 1.05533  | 1.47376  | 2.09424  |
| N | 1.29693  | 1.51288  | 1.11285  |
| C | 2.66369  | 1.63748  | 0.90766  |
| O | 3.40232  | 1.76638  | 1.86224  |
| C | 3.13991  | 1.61401  | -0.52448 |
| H | 4.18139  | 1.92998  | -0.53789 |
| H | 3.08219  | 0.59634  | -0.92543 |
| H | 2.54523  | 2.27139  | -1.16504 |
| C | -1.06778 | -2.21456 | -0.41514 |
| H | -1.32524 | -2.40858 | 0.62324  |
| H | -1.70080 | -2.79144 | -1.08381 |
| C | 0.35213  | -2.16190 | -0.70302 |
| C | 1.28721  | -2.14649 | 0.27044  |
| C | 5.45169  | -1.44031 | -0.20513 |
| C | 4.83488  | -1.23940 | 1.02533  |
| C | 3.48361  | -1.52530 | 1.17475  |
| C | 2.72600  | -1.98310 | 0.08841  |
| C | 3.36234  | -2.19243 | -1.14598 |
| C | 4.71618  | -1.92712 | -1.28685 |
| H | 6.50827  | -1.22575 | -0.32394 |
| H | 5.39761  | -0.85040 | 1.86572  |
| H | 3.00364  | -1.35540 | 2.13403  |
| H | 2.80561  | -2.58658 | -1.99029 |
| H | 5.20322  | -2.10072 | -2.24020 |
| H | 0.64948  | -2.08692 | -1.74592 |
| H | 0.95233  | -2.22013 | 1.30546  |

Electronic energy = -1206.237886

Zero-point electronic energy = -1205.780815

Enthalpy = -1205.75399

Free energy = -1205.837376

Free energy with quasiharmonic approximation = -1205.83244

Frequencies = -361.4792 32.3351 35.1546 -361.4778 32.2412 35.0046

SCF ( $\omega$ B97x-D/6-311+G(d,p)-SMD (nitromethane)) = -1206.602148

# On the prevalence of bridged macrocyclic pyrroloindolines formed in regiodivergent alkylations of tryptophan

Tristin E. Rose,<sup>†</sup> Brice H. Curtin,<sup>†</sup> Kenneth V. Lawson,<sup>†</sup> Adam Simon, K. N. Houk, Patrick G. Harran  
 Department of Chemistry and Biochemistry, University of California Los Angeles  
 607 Charles E. Young Drive East, Los Angeles, CA 90095-1569

## NMR Structural Data

| Compound No. | Structure                                                                            | Page # |
|--------------|--------------------------------------------------------------------------------------|--------|
| 6            | 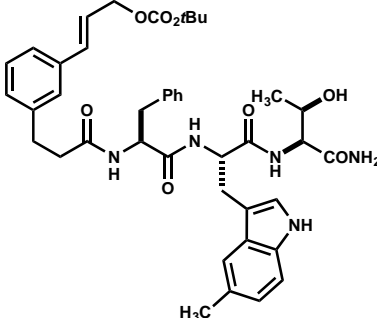   | 13     |
| 8b           |    | 14     |
| 8c           |  | 17     |
| 8d           |  | 19     |

|    |                                                                                      |    |
|----|--------------------------------------------------------------------------------------|----|
| 7  | 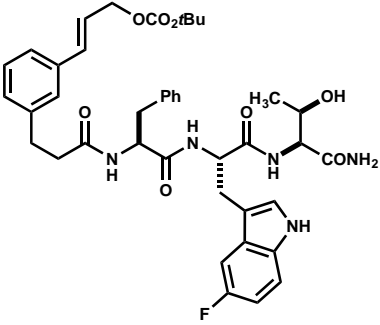   | 22 |
| 9a |    | 23 |
| 9b |    | 26 |
| 9c |  | 29 |
| 9d |  | 32 |

|            |                                                                                                                            |           |
|------------|----------------------------------------------------------------------------------------------------------------------------|-----------|
| <p>10</p>  | 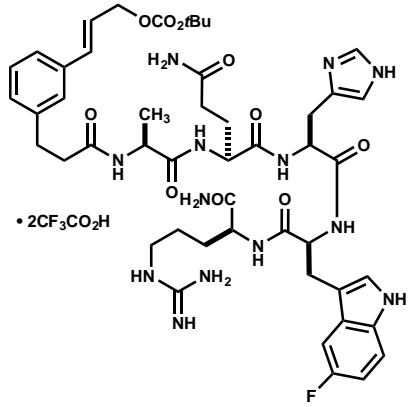 <p>• 2CF<sub>3</sub>CO<sub>2</sub>H</p> | <p>35</p> |
| <p>11a</p> |                                          | <p>36</p> |
| <p>11b</p> |                                         | <p>39</p> |
| <p>11c</p> |                                        | <p>42</p> |

|            |                                                                                      |           |
|------------|--------------------------------------------------------------------------------------|-----------|
| <p>11d</p> | 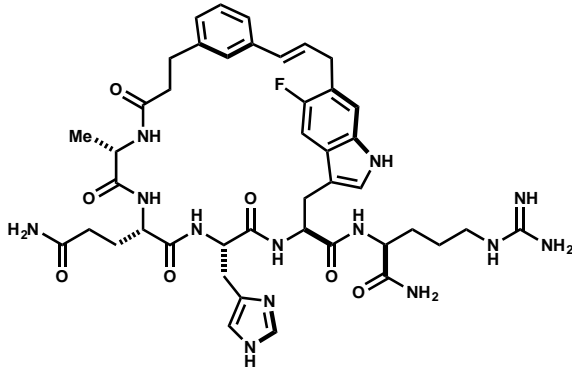   | <p>45</p> |
| <p>11a</p> |    | <p>48</p> |
| <p>12</p>  |   | <p>51</p> |
| <p>16a</p> |  | <p>52</p> |
| <p>16b</p> |  | <p>55</p> |

|     |                                                                                      |    |
|-----|--------------------------------------------------------------------------------------|----|
| 16c | 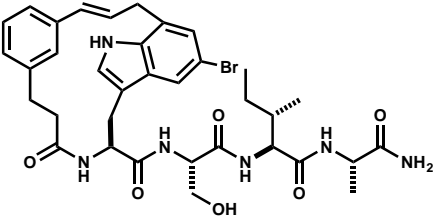   | 58 |
| 16d |    | 61 |
| 13  |    | 64 |
| 17a |   | 65 |
| 17b |  | 68 |
| 17c |  | 71 |
| 17d |  | 74 |

|     |                                                                                      |    |
|-----|--------------------------------------------------------------------------------------|----|
| 17e | 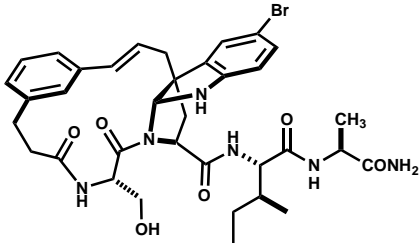   | 77 |
| 14  |    | 80 |
| 18a |    | 81 |
| 18b |   | 84 |
| 18c |  | 87 |
| 18d |  | 90 |

|     |                                                                                      |     |
|-----|--------------------------------------------------------------------------------------|-----|
| 18e | 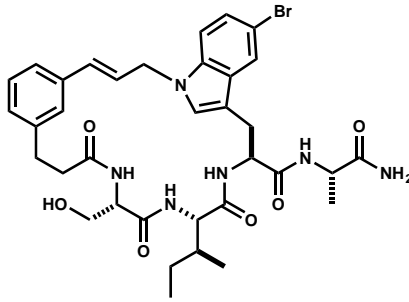   | 92  |
| 15  |    | 94  |
| 19a |   | 95  |
| 19b |  | 98  |
| 19c |  | 101 |



|            |                                                                                      |            |
|------------|--------------------------------------------------------------------------------------|------------|
| <p>19d</p> | 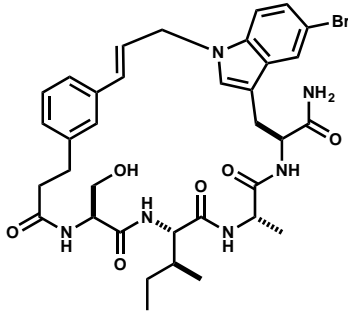   | <p>104</p> |
| <p>S1</p>  |    | <p>108</p> |
| <p>S2a</p> |   | <p>109</p> |
| <p>S2b</p> |  | <p>111</p> |
| <p>S2c</p> |  | <p>114</p> |

|                   |  |            |
|-------------------|--|------------|
| <p><b>S2d</b></p> |  | <p>117</p> |
| <p><b>S3</b></p>  |  | <p>120</p> |
| <p><b>S4a</b></p> |  | <p>121</p> |
| <p><b>S4b</b></p> |  | <p>124</p> |
| <p><b>S5</b></p>  |  | <p>127</p> |
| <p><b>S6a</b></p> |  | <p>128</p> |

|     |                                                                                      |     |
|-----|--------------------------------------------------------------------------------------|-----|
| S6b | 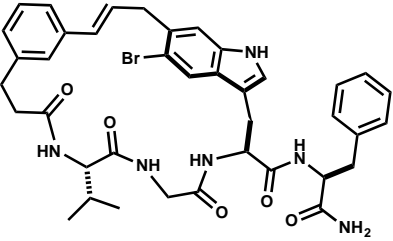   | 131 |
| S6c |    | 133 |
| S6d |    | 136 |
| S7  |    | 139 |
| 21a |  | 140 |
| 21b |  | 142 |
| 22  |   | 144 |
| S8  |   | 145 |
| S9  |   | 146 |

|     |                                                                                      |     |
|-----|--------------------------------------------------------------------------------------|-----|
| 24  | 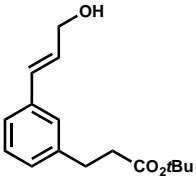    | 147 |
| 26  |    | 148 |
| 27  |    | 150 |
| S11 |   | 151 |
| 30  |  | 152 |

|            |                                                                                      |            |
|------------|--------------------------------------------------------------------------------------|------------|
| <p>31a</p> | 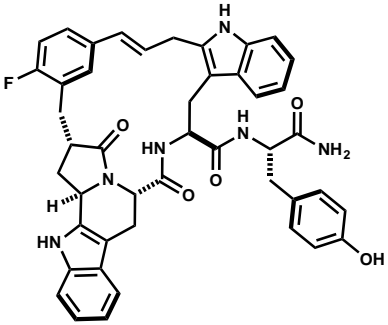   | <p>154</p> |
| <p>31b</p> |    | <p>157</p> |
| <p>31c</p> |   | <p>160</p> |
| <p>31e</p> |  | <p>163</p> |
| <p>31f</p> |  | <p>167</p> |

Acyclic Precursor 6

Current Data Parameters  
 NAME BC-III-196\_chromatographed  
 EXPNO 1  
 PROCNO 1

F2 - Acquisition Parameters  
 Date\_ 20150424  
 Time 12.54  
 INSTRUM av500  
 PROBHD 5 mm DCH 13C-1  
 PULPROG zg30  
 TD 65536  
 SOLVENT DMSO  
 NS 8  
 DS 0  
 SMH 10000.000 Hz  
 FIDRES 0.152588 Hz  
 AQ 3.2768500 sec  
 RG 12.14  
 DW 50.000 usec  
 DE 10.00 usec  
 TE 298.0 K  
 D1 2.0000000 sec  
 TDO 1

----- CHANNEL f1 -----  
 SF01 500.1330008 MHz  
 NUC1 1H  
 P1 10.00 usec  
 PLW1 13.50000000 W

F2 - Processing parameters  
 SI 65536  
 SF 500.1299943 MHz  
 WDW EM  
 SSB 0  
 LB 0.30 Hz  
 GB 0  
 PC 1.00

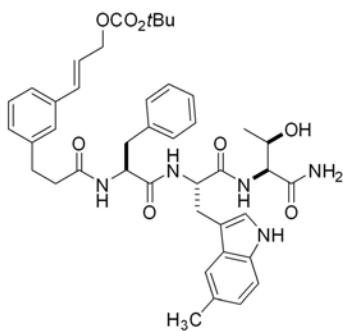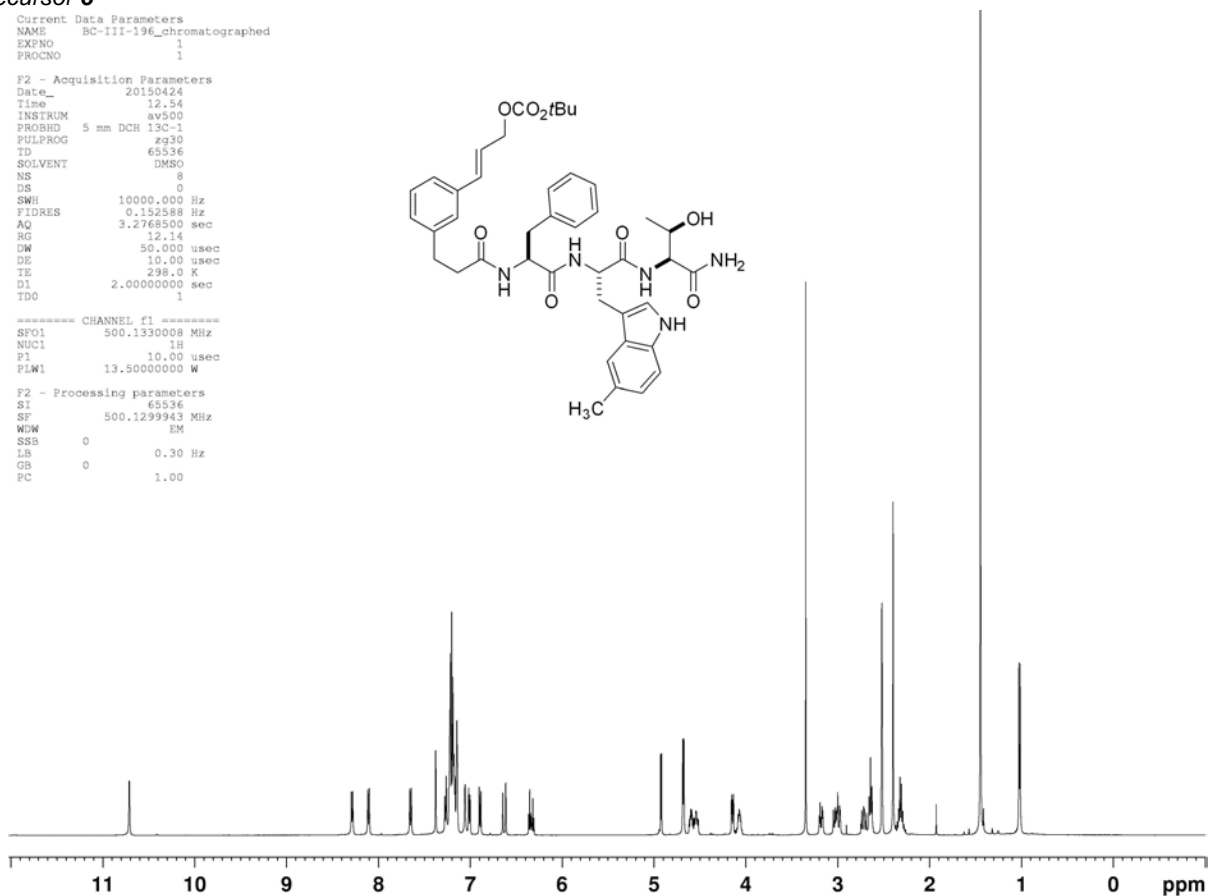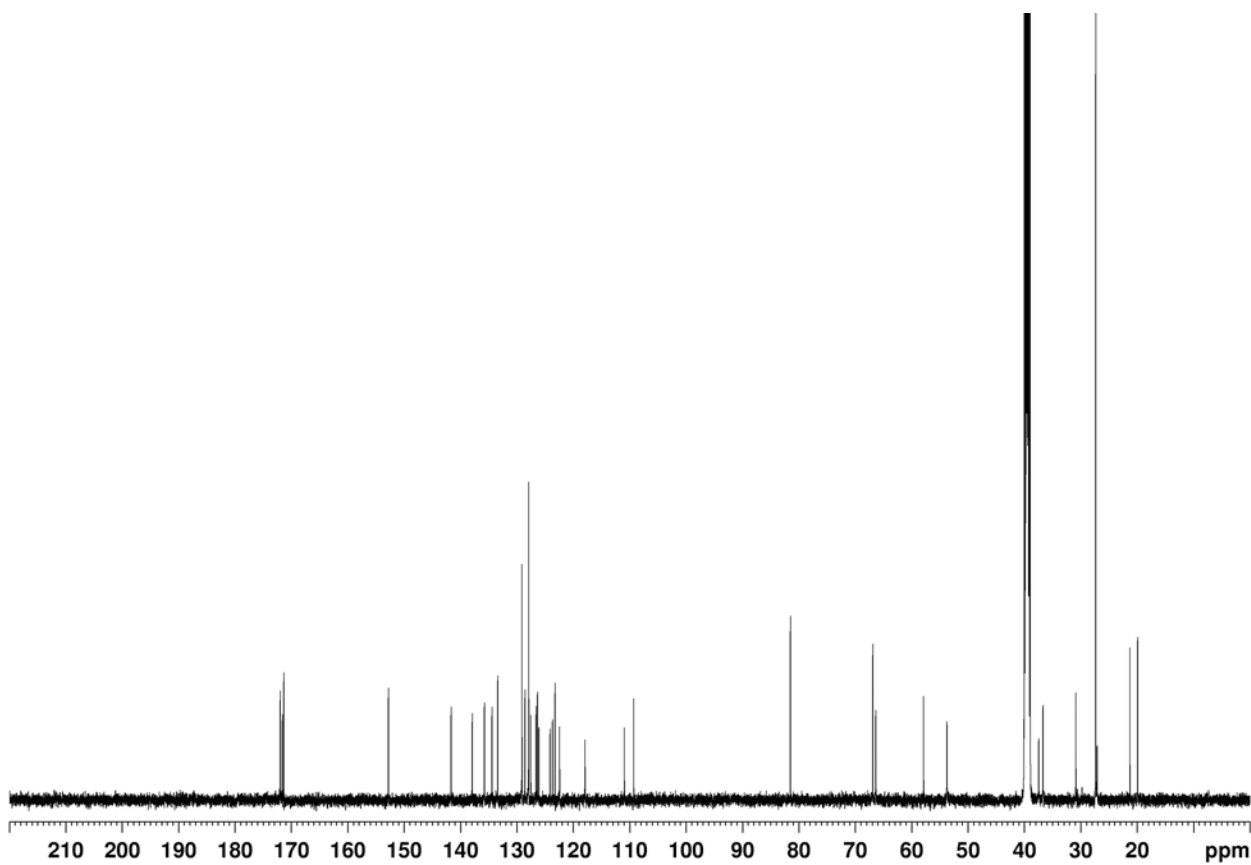

Macrocyclic Product **8b**

Current Data Parameters  
 NAME KL-5-108-2\_TROSE  
 EXPNO 3  
 PROCNO 1

F2 - Acquisition Parameters  
 Date\_ 20130110  
 Time 18.39  
 INSTRUM av600  
 PROBHD 5 mm TBI5  
 PULPROG zg  
 TD 65536  
 SOLVENT DMSO  
 NS 8  
 DS 0  
 SWH 12376.237 Hz  
 FIDRES 0.188846 Hz  
 AQ 2.6476543 sec  
 RG 114  
 DW 40.400 usec  
 DE 6.50 usec  
 TE 298.0 K  
 D1 2.0000000 sec  
 TDO 1

===== CHANNEL f1 =====  
 NUC1 1H  
 P1 9.55 usec  
 PL1 -2.00 dB  
 PLLW 39.81071854 W  
 SFO1 600.1336008 MHz

F2 - Processing parameters  
 SI 65536  
 SF 600.1300070 MHz  
 WDF EM  
 SSB 0  
 LB 0.20 Hz  
 GB 0  
 PC 1.00

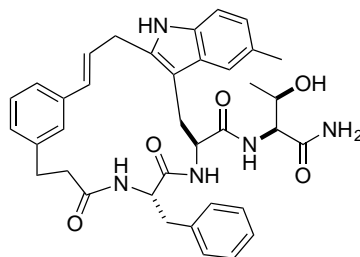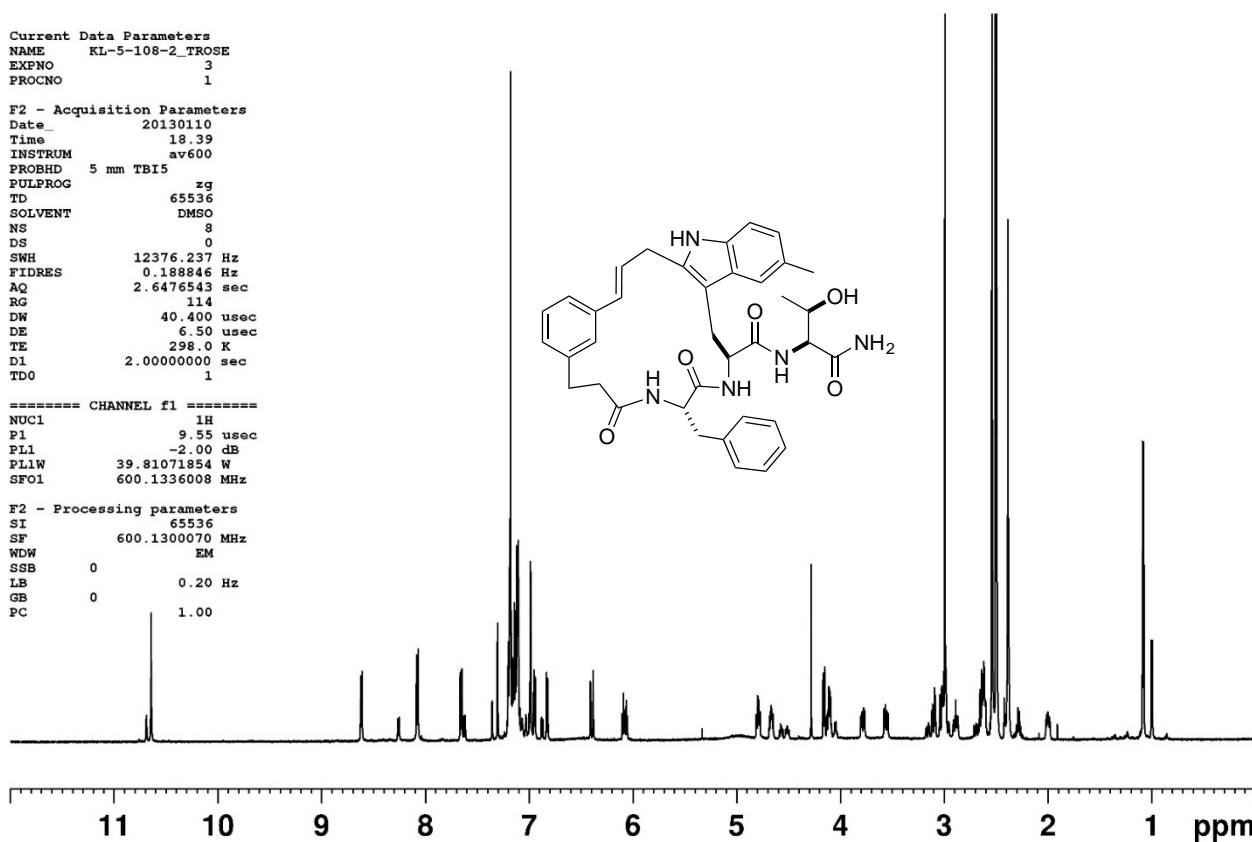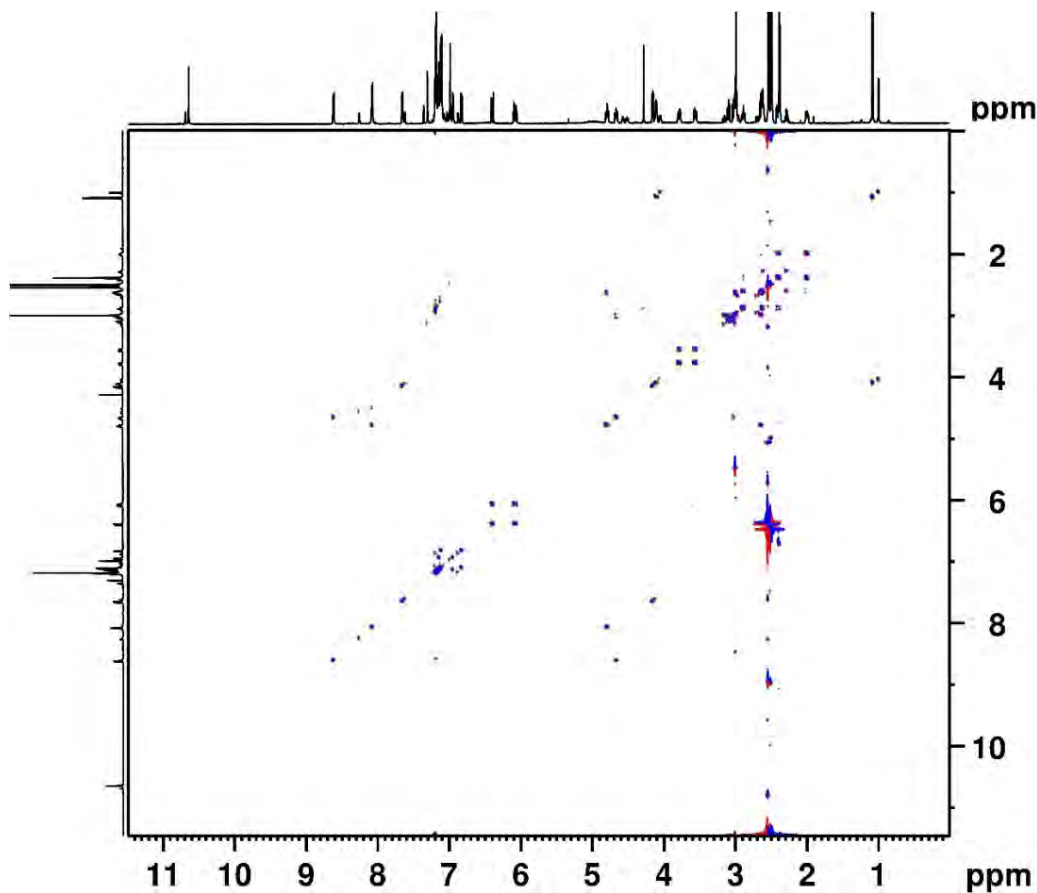

Current Data Parameters  
 NAME KL-5-108-2\_TROSE  
 EXPNO 4  
 PROCNO 1

F2 - Acquisition Parameters  
 Date\_ 20130110  
 Time 18.41  
 INSTRUM av600  
 PROBHD 5 mm TBI5  
 PULPROG cosygpmfph  
 TD 2048  
 SOLVENT DMSO  
 NS 1  
 DS 16  
 SWH 6887.052 Hz  
 FIDRES 3.362818 Hz  
 AQ 0.1486848 sec  
 RG 114  
 DW 72.600 usec  
 DE 6.50 usec  
 TE 298.0 K  
 D0 0.00006044 sec  
 D1 1.5000000 sec  
 D13 0.0000400 sec  
 D16 0.0020000 sec  
 IN0 0.00014520 sec

===== CHANNEL f1 =====  
 NUC1 1H  
 P1 9.55 usec  
 P2 19.10 usec  
 PL1 -2.00 dB  
 PLLW 39.81071854 W  
 SFO1 600.1334507 MHz

===== GRADIENT CHANNEL =====  
 GPNAM[1] SINE.100  
 GPNAM[2] SINE.100  
 GPX1 0 %  
 GPX2 0 %  
 GY1 0 %  
 GY2 0 %  
 GPZ1 10.00 %  
 GPZ2 20.00 %  
 P16 1000.00 usec

F1 - Acquisition parameters  
 TD 512  
 SFO1 600.1335 MHz  
 FIDRES 13.451290 Hz  
 SW 11.476 ppm  
 FnmODE States-TPPI

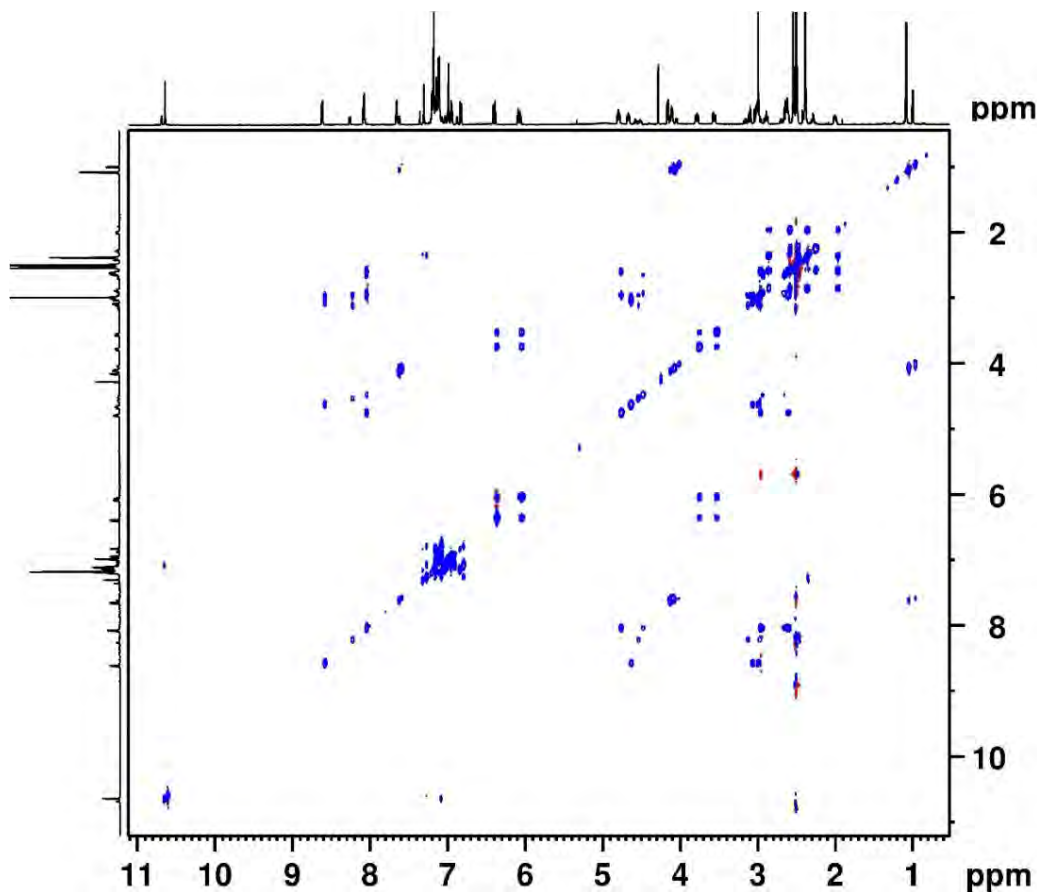

Current Data Parameters  
 NAME KL-5-108-2\_TROSE  
 EXPNO 8  
 PROCNO 1

F2 - Acquisition Parameters  
 Date 20130111  
 Time 1.25  
 INSTRUM av600  
 PROBHD 5 mm TBI5  
 PULPROG dipsi2etgpsi  
 TD 2048  
 SOLVENT DMSO  
 NS 8  
 DS 16  
 SWH 6887.052 Hz  
 FIDRES 3.362818 Hz  
 AQ 0.1486848 sec  
 RG 362  
 DW 72.600 usec  
 DE 6.50 usec  
 TE 298.0 K  
 D0 0.00000300 sec  
 D1 1.50000000 sec  
 D9 0.06000000 sec  
 D11 0.03000000 sec  
 D16 0.00020000 sec  
 D20 0.00001000 sec  
 D21 0.00001000 sec  
 IN0 0.00014520 sec  
 L1 14

===== CHANNEL f1 =====  
 NUC1 1H  
 P1 9.55 usec  
 P2 19.10 usec  
 P6 40.00 usec  
 FLL -2.00 dB  
 FLL0 10.44 dB  
 FL1W 39.81071854 W  
 FL10W 2.26986504 W  
 SFO1 600.1334507 MHz

===== GRADIENT CHANNEL =====  
 GPNAM[1] SINE.100  
 GPNAM[2] SINE.100  
 GPX1 0 %  
 GPX2 0 %  
 GY1 0 %  
 GY2 0 %  
 GPZ1 30.00 %  
 GPZ2 30.00 %  
 P16 1000.00 usec

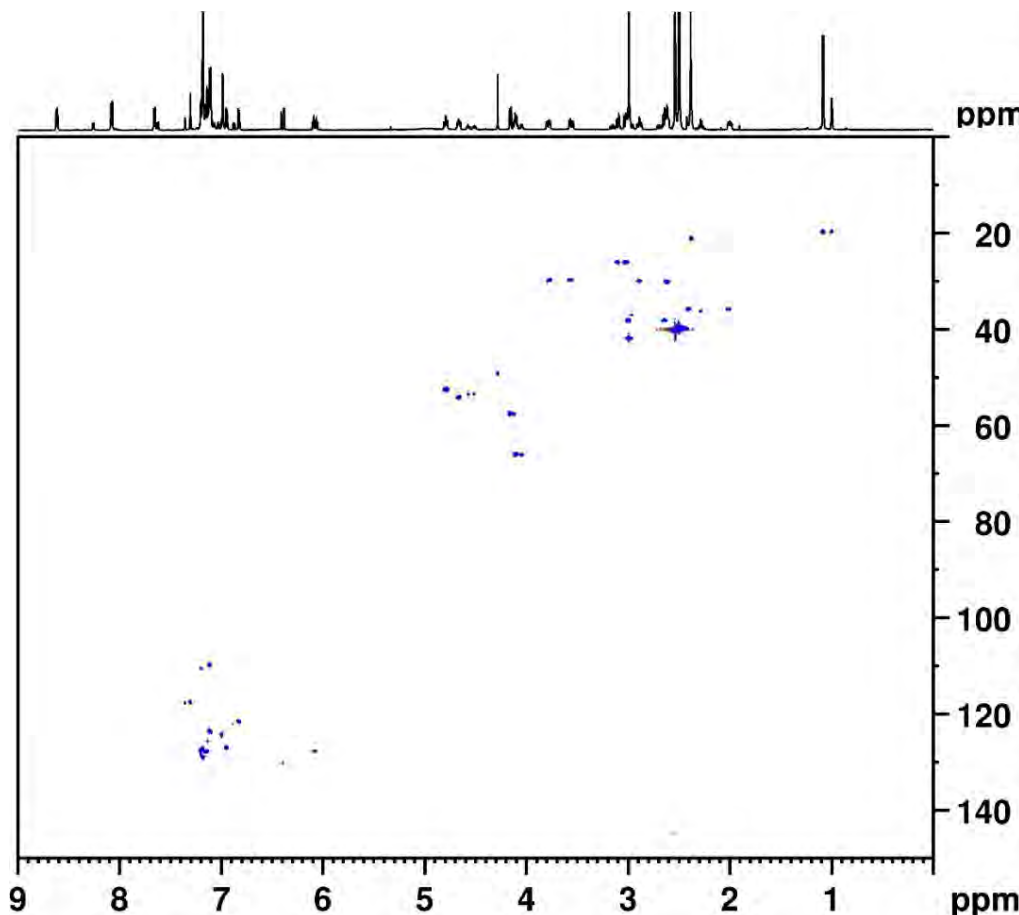

Current Data Parameters  
 NAME KL-5-108-2\_TROSE  
 EXPNO 6  
 PROCNO 1

F2 - Acquisition Parameters  
 Date 20130110  
 Time 18.58  
 INSTRUM av600  
 PROBHD 5 mm TBI5  
 PULPROG hsqcetgpsiisp  
 TD 2048  
 SOLVENT DMSO  
 NS 16  
 DS 16  
 SWH 6009.615 Hz  
 FIDRES 2.934382 Hz  
 AQ 0.1703936 sec  
 RG 26008  
 DW 83.200 usec  
 DE 6.00 usec  
 TE 298.1 K  
 CNST2 145.0000000  
 D0 0.00000300 sec  
 D1 1.00000000 sec  
 D4 0.00172414 sec  
 D11 0.03000000 sec  
 D16 0.00020000 sec  
 D24 0.00086200 sec  
 IN0 0.00002070 sec  
 ZGPTNS

===== CHANNEL f1 =====  
 NUC1 1H  
 P1 9.55 usec  
 P2 19.10 usec  
 P28 1000.00 usec  
 FL1 -2.00 dB  
 FL1W 39.81071854 W  
 SFO1 600.1327006 MHz

===== CHANNEL f2 =====  
 CPDPRG[2] garp  
 NUC2 13C  
 P3 18.50 usec  
 P4 37.00 usec  
 P14 1000.00 usec  
 PCPD2 65.00 usec  
 PL0 120.00 dB  
 PL2 -3.00 dB  
 PL12 7.91 dB  
 PLOW 0 W  
 PL2W 150.35617065 W  
 PL12W 12.19330025 W  
 SFO2 150.9133722 MHz



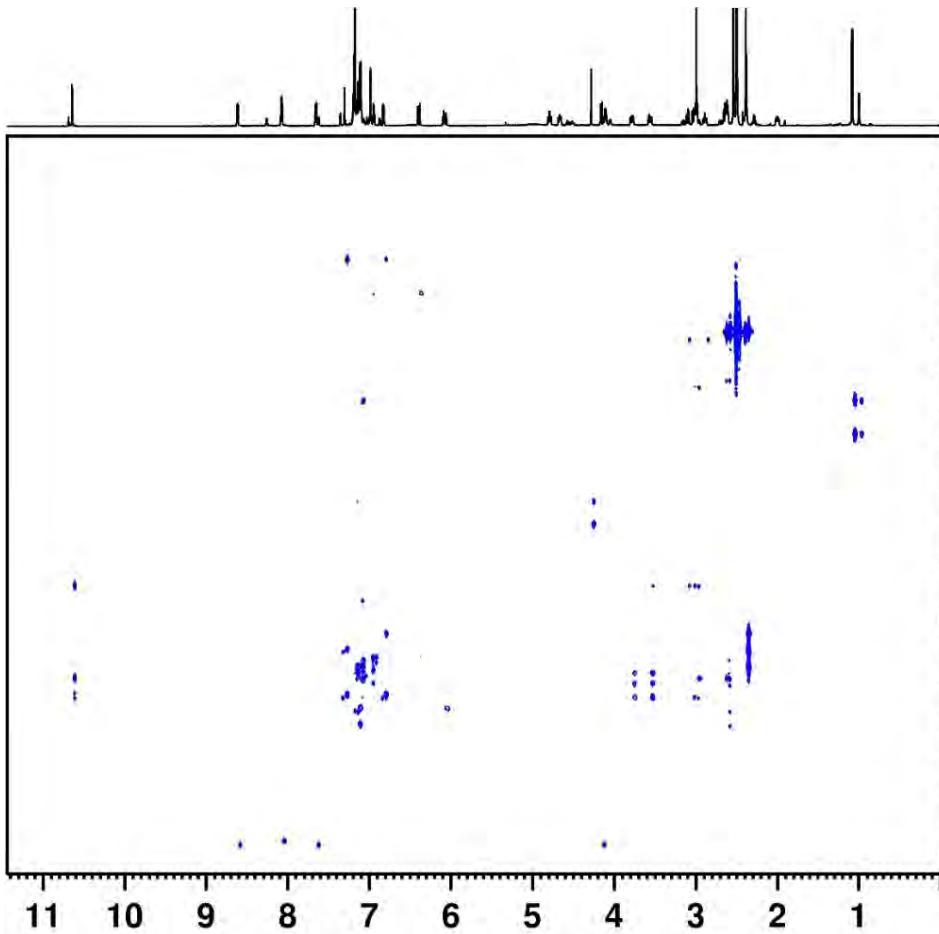

Current Data Parameters  
 NAME KL-5-108-2\_TROSE  
 EXPNO 7  
 PROCNO 1

F2 - Acquisition Parameters  
 Date 20130110  
 Time 20.20  
 INSTRUM av600  
 PROBHD 5 mm TB15  
 PULPROG hmbcgp12ndqf  
 TD 2048  
 SOLVENT DMSO  
 NS 50  
 DS 24  
 SWH 6887.052 Hz  
 FIDRES 3.362818 Hz  
 AQ 0.1486848 sec  
 RG 26008  
 DW 72.600 usec  
 DE 6.00 usec  
 TE 298.0 K  
 CNST6 125.0000000  
 CNST7 165.0000000  
 CNST13 8.0000000  
 D0 0.00000300 sec  
 D1 1.20000005 sec  
 D6 0.06250000 sec  
 D16 0.00020000 sec  
 IN0 0.00001745 sec

==== CHANNEL f1 =====  
 NUC1 1H  
 P1 9.55 usec  
 P2 19.10 usec  
 PL1 -2.00 dB  
 PL1W 39.81071854 W  
 SFO1 600.1334507 MHz

==== CHANNEL f2 =====  
 NUC2 13C  
 P3 18.50 usec  
 PL2 -3.00 dB  
 PL2W 150.35617065 W  
 SFO2 150.9156357 MHz

==== GRADIENT CHANNEL =====  
 GPNAM[1] SINE.100  
 GPNAM[2] SINE.100  
 GPNAM[3] SINE.100  
 GPNAM[4] SINE.100  
 GPNAM[5] SINE.100  
 GPNAM[6] SINE.100  
 GPX1 0 %  
 GPX2 0 %

Macrocyclic Product **8c**

Current Data Parameters  
 NAME KL-5-108-3-1\_TROSE  
 EXPNO 4  
 PROCNO 1

F2 - Acquisition Parameters  
 Date\_ 20130113  
 Time 17.25  
 INSTRUM av600  
 PROBHD 5 mm TBI5  
 PULPROG zg  
 TD 65536  
 SOLVENT DMSO  
 NS 8  
 DS 0  
 SWH 12376.237 Hz  
 FIDRES 0.188846 Hz  
 AQ 2.6476543 sec  
 RG 128  
 DW 40.400 usec  
 DE 6.50 usec  
 TE 320.0 K  
 D1 2.0000000 sec  
 TDO 1

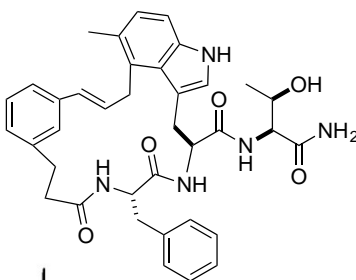

===== CHANNEL f1 =====  
 NUC1 1H  
 P1 9.73 usec  
 PLL -2.00 dB  
 PLLW 39.81071854 W  
 SFO1 600.1336008 MHz

F2 - Processing parameters  
 SI 65536  
 SF 600.1300070 MHz  
 WDF EM  
 SSB 0  
 LB 0 Hz  
 GB 0  
 PC 1.00

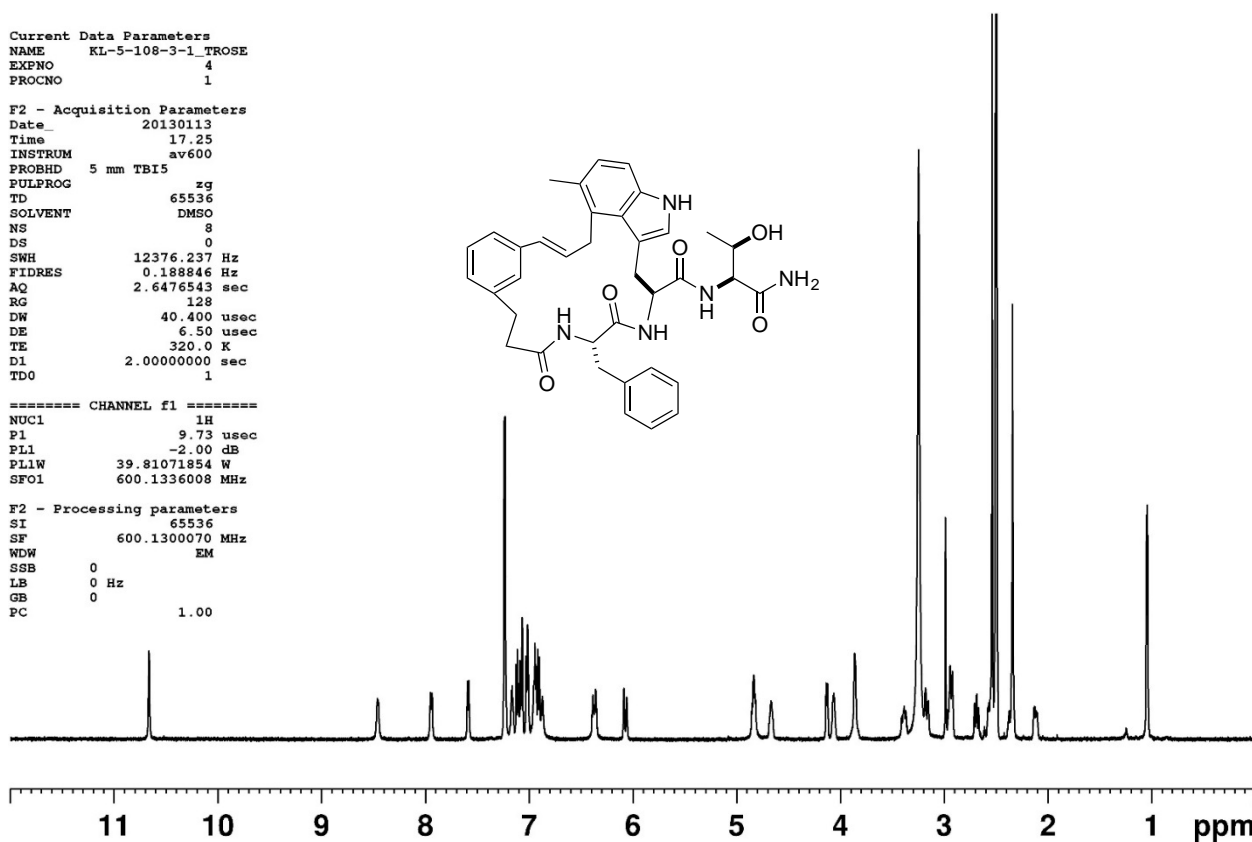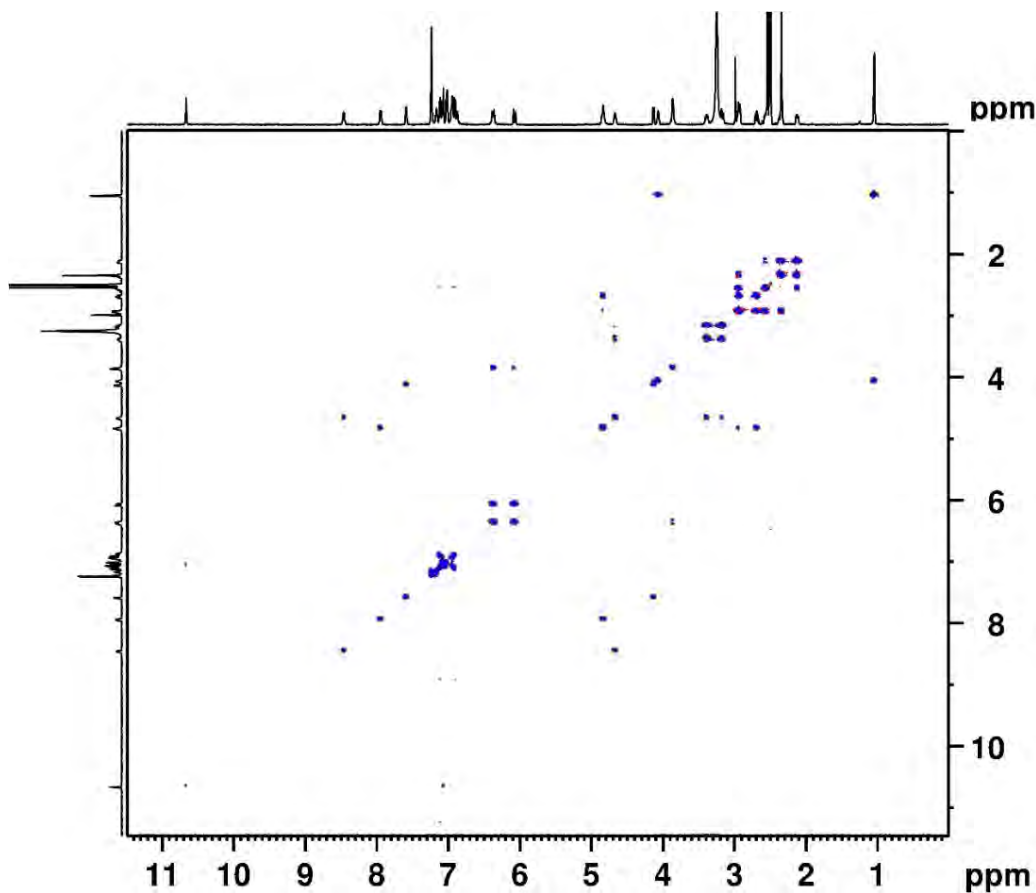

Current Data Parameters  
 NAME KL-5-108-3-1\_TROSE  
 EXPNO 10  
 PROCNO 1

F2 - Acquisition Parameters  
 Date\_ 20130113  
 Time 17.28  
 INSTRUM av600  
 PROBHD 5 mm TBI5  
 PULPROG cosygpmfph  
 TD 2048  
 SOLVENT DMSO  
 NS 1  
 DS 16  
 SWH 6887.052 Hz  
 FIDRES 3.362818 Hz  
 AQ 0.1486848 sec  
 RG 128  
 DW 72.600 usec  
 DE 6.50 usec  
 TE 320.0 K  
 D0 0.00006021 sec  
 D1 1.5000000 sec  
 D13 0.0000400 sec  
 D16 0.0020000 sec  
 IN0 0.00014520 sec

===== CHANNEL f1 =====  
 NUC1 1H  
 P1 9.73 usec  
 P2 19.46 usec  
 PLL -2.00 dB  
 PLLW 39.81071854 W  
 SFO1 600.1334507 MHz

===== GRADIENT CHANNEL =====  
 GPNAM[1] SINE.100  
 GPNAM[2] SINE.100  
 GPX1 0 %  
 GPX2 0 %  
 GY1 0 %  
 GY2 0 %  
 GPZ1 10.00 %  
 GPZ2 20.00 %  
 P16 1000.00 usec

F1 - Acquisition parameters  
 TD 512  
 SFO1 600.1335 MHz  
 FIDRES 13.451290 Hz  
 SW 11.476 ppm  
 FMODE States-TPPI

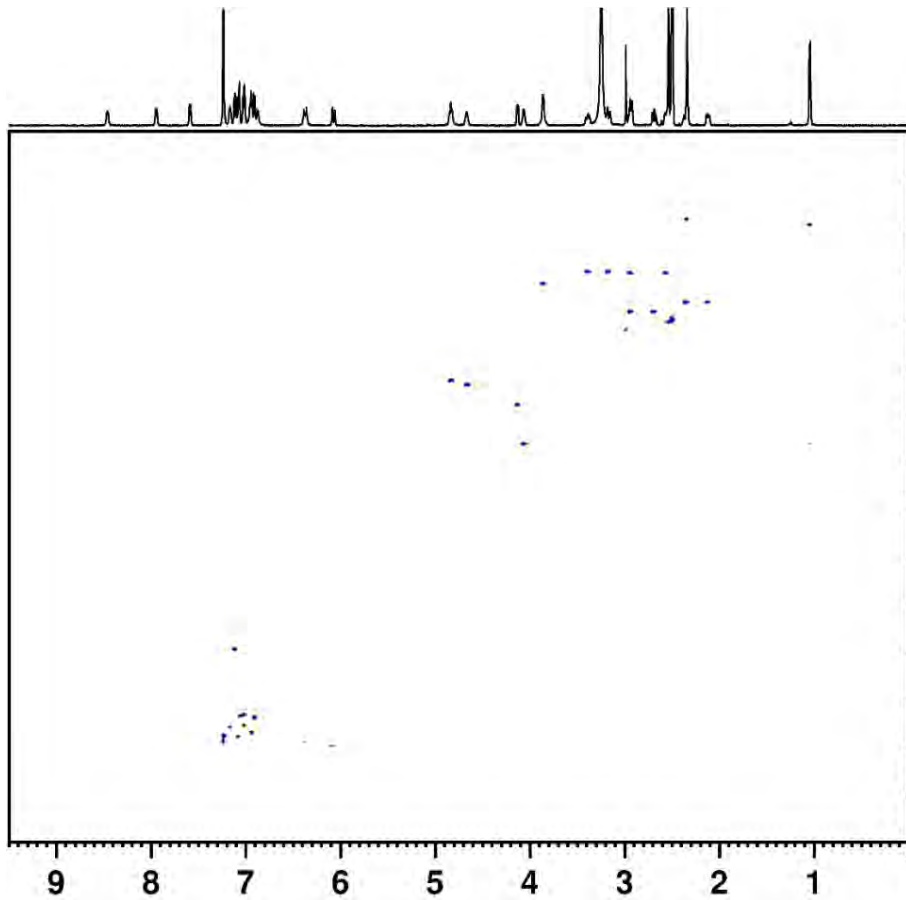

Current Data Parameters  
 NAME KL-5-108-3-1\_TROSE  
 EXPNO 11  
 PROCNO 1

F2 - Acquisition Parameters  
 Date 20130113  
 Time 17.43  
 INSTRUM av600  
 PROBHD 5 mm TBI5  
 PULPROG hsqcetgpsisp  
 TD 2048  
 SOLVENT DMSO  
 NS 4  
 DS 16  
 SWH 6009.615 Hz  
 FIDRES 2.934382 Hz  
 AQ 0.1703936 sec  
 RG 26008  
 DW 83.200 usec  
 DE 6.00 usec  
 TE 320.1 K  
 CNST2 145.000000  
 D0 0.0000300 sec  
 D1 1.0000000 sec  
 D4 0.00172414 sec  
 D11 0.03000000 sec  
 D16 0.00020000 sec  
 D24 0.00086200 sec  
 IN0 0.00002070 sec  
 ZGPTNS

===== CHANNEL f1 =====  
 NUC1 1H  
 P1 9.73 usec  
 P2 19.46 usec  
 P28 1000.00 usec  
 PL1 -2.00 dB  
 PL1W 39.81071854 W  
 SFO1 600.1327006 MHz

===== CHANNEL f2 =====  
 CPDPRG[2] garp  
 NUC2 13C  
 P3 18.50 usec  
 P4 37.00 usec  
 P14 1000.00 usec  
 PCPD2 65.00 usec  
 PL0 120.00 dB  
 PL2 -3.00 dB  
 PL12 7.91 dB  
 PL0W 0 W  
 PL2W 150.35617065 W  
 PL12W 12.19330025 W  
 SFO2 150.9133722 MHz

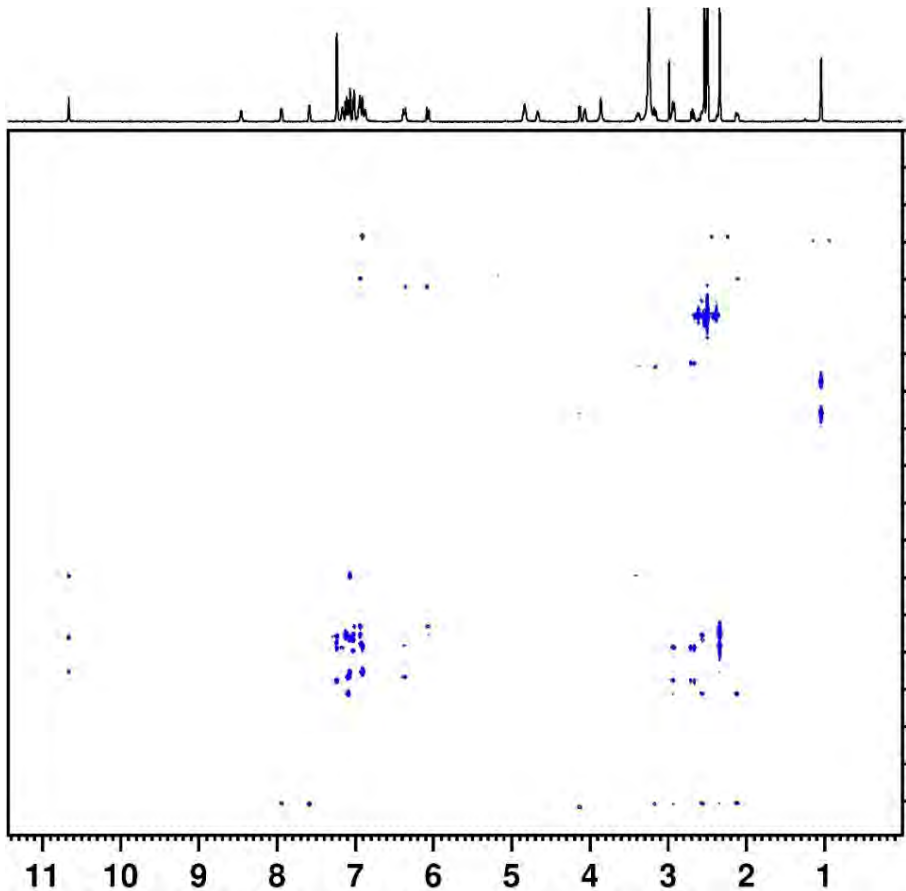

Current Data Parameters  
 NAME KL-5-108-3-1\_TROSE  
 EXPNO 14  
 PROCNO 1

F2 - Acquisition Parameters  
 Date 20130113  
 Time 21.51  
 INSTRUM av600  
 PROBHD 5 mm TBI5  
 PULPROG hmbcgp12ndgf  
 TD 2048  
 SOLVENT DMSO  
 NS 50  
 DS 24  
 SWH 6887.052 Hz  
 FIDRES 3.362818 Hz  
 AQ 0.1486848 sec  
 RG 26008  
 DW 72.600 usec  
 DE 6.00 usec  
 TE 320.0 K  
 CNST6 125.000000  
 CNST7 165.000000  
 CNST13 8.000000  
 D0 0.00000300 sec  
 D1 1.20000005 sec  
 D6 0.06250000 sec  
 D16 0.00020000 sec  
 IN0 0.00001745 sec

===== CHANNEL f1 =====  
 NUC1 1H  
 P1 9.73 usec  
 P2 19.46 usec  
 PL1 -2.00 dB  
 PL1W 39.81071854 W  
 SFO1 600.1334507 MHz

===== CHANNEL f2 =====  
 NUC2 13C  
 P3 18.50 usec  
 PL2 -3.00 dB  
 PL2W 150.35617065 W  
 SFO2 150.9156357 MHz

===== GRADIENT CHANNEL =====  
 GPNAM[1] SINE.100  
 GPNAM[2] SINE.100  
 GPNAM[3] SINE.100  
 GPNAM[4] SINE.100  
 GPNAM[5] SINE.100  
 GPNAM[6] SINE.100  
 GPX1 0 %  
 GPX2 0 %

Macrocyclic Product **8d**

Current Data Parameters  
 NAME KL-5-108-5-1\_AV500  
 EXPNO 2  
 PROCNO 1

F2 - Acquisition Parameters  
 Date\_ 20130110  
 Time 19.42  
 INSTRUM av500  
 PROBHD 5 mm DCH 13C-1  
 PULPROG zg  
 TD 65536  
 SOLVENT DMSO  
 NS 64  
 DS 0  
 SWH 10000.000 Hz  
 FIDRES 0.152588 Hz  
 AQ 3.2767999 sec  
 RG 44.31  
 DW 50.000 usec  
 DE 10.00 usec  
 TE 298.0 K  
 D1 2.0000000 sec  
 TD0 1

===== CHANNEL f1 =====  
 SF01 500.1330008 MHz  
 NUC1 1H  
 P1 9.50 usec  
 PLW1 13.50000000 W

F2 - Processing parameters  
 SI 65536  
 SF 500.1300052 MHz  
 WDW EM  
 SSB 0  
 LB 0.30 Hz  
 GB 0  
 PC 1.00

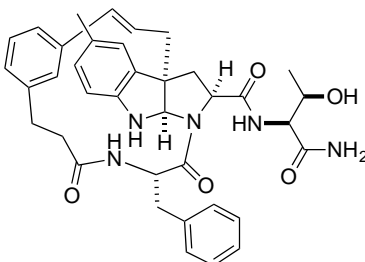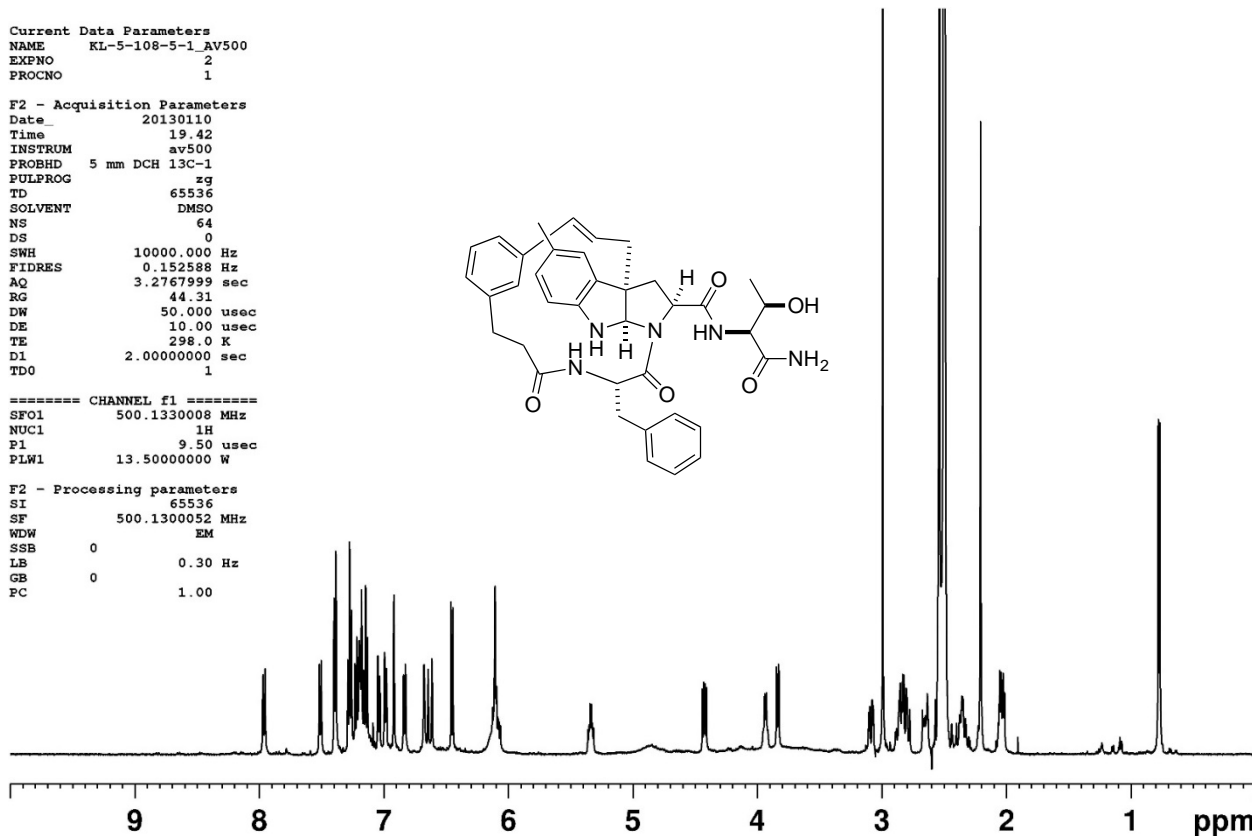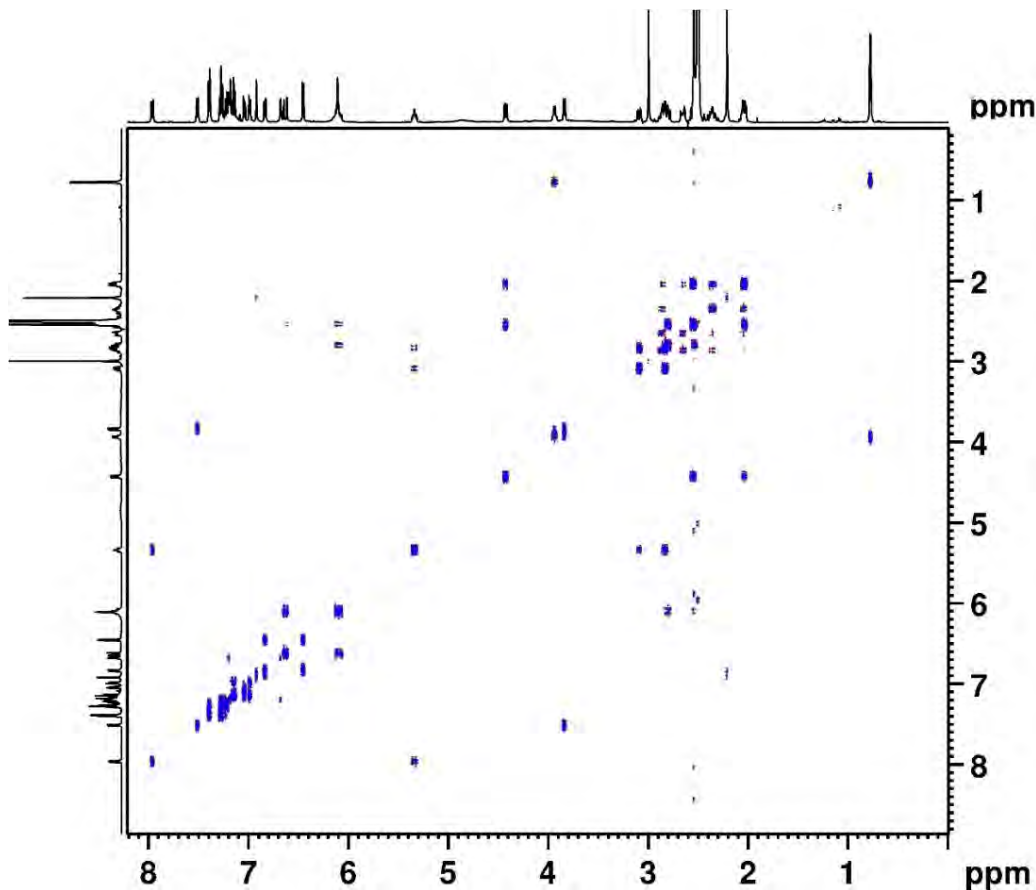

Current Data Parameters  
 NAME KL-5-108-5-1 AV500  
 EXPNO 3  
 PROCNO 1

F2 - Acquisition Parameters  
 Date\_ 20130110  
 Time 19.43  
 INSTRUM av500  
 PROBHD 5 mm DCH 13C-1  
 PULPROG cosygpmfph  
 TD 4096  
 SOLVENT DMSO  
 NS 4  
 DS 8  
 SWH 5498.534 Hz  
 FIDRES 1.342415 Hz  
 AQ 0.3724629 sec  
 RG 202.91  
 DW 90.933 usec  
 DE 10.00 usec  
 TE 298.0 K  
 D0 0.00007880 sec  
 D1 2.00000000 sec  
 D13 0.00000400 sec  
 D16 0.00020000 sec  
 IN0 0.00018180 sec

===== CHANNEL f1 =====  
 SF01 500.1327507 MHz  
 NUC1 1H  
 P1 9.50 usec  
 P2 19.00 usec  
 PLW1 13.50000000 W

===== GRADIENT CHANNEL =====  
 GFNAM[1] SMSQ10.100  
 GFNAM[2] SMSQ10.100  
 GPZ1 10.00 %  
 GPZ2 20.00 %  
 P16 1000.00 usec

F1 - Acquisition parameters  
 TD 256  
 SF01 500.1328 MHz  
 FIDRES 21.486525 Hz  
 SW 10.998 ppm  
 FMODE States-TPPI

F2 - Processing parameters  
 SI 4096  
 SF 500.1300046 MHz  
 WDW SINE  
 SSB 1

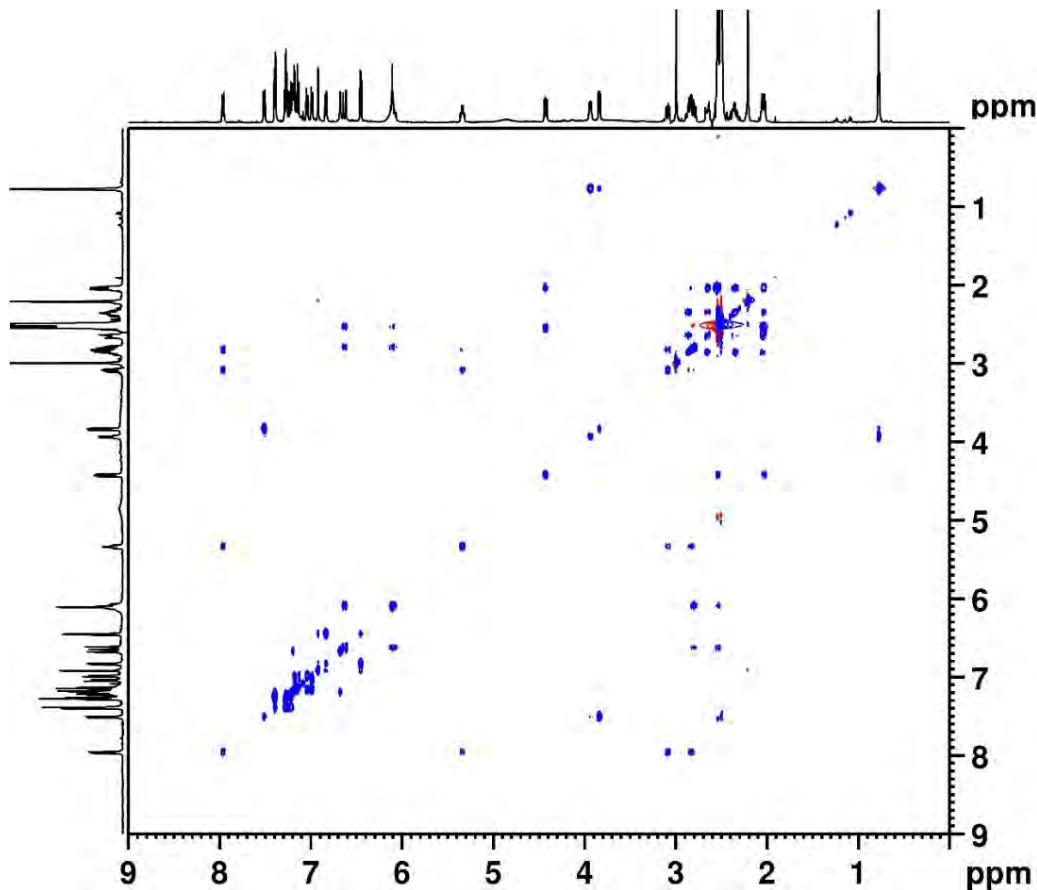

Current Data Parameters  
 NAME KL-5-108-5-1\_AV500  
 EXPNO 4  
 PROCNO 1

F2 - Acquisition Parameters  
 Date 20130110  
 Time 20.24  
 INSTRUM av500  
 PROBHD 5 mm DCH 13C-1  
 PULPROG mleveltpp.js  
 TD 2048  
 SOLVENT DMSO  
 NS 4  
 DS 8  
 SWH 5000.000 Hz  
 FIDRES 2.441406 Hz  
 AQ 0.2048000 sec  
 RG 37.94  
 DW 100.000 usec  
 DE 10.00 usec  
 TE 298.0 K  
 D0 0.00000300 sec  
 D1 2.00000000 sec  
 D9 0.06000000 sec  
 D11 0.03000000 sec  
 D12 0.00002000 sec  
 D16 0.00020000 sec  
 IN0 0.00020000 sec  
 L1 24

===== CHANNEL f1 =====  
 SFO1 500.1325007 MHz  
 NUC1 1H  
 P1 9.50 usec  
 P2 19.00 usec  
 P5 26.68 usec  
 P6 40.00 usec  
 P7 80.00 usec  
 P17 2500.00 usec  
 PLW1 13.50000000 W  
 PLW10 0.84375000 W

===== GRADIENT CHANNEL =====  
 GPNAM[1] SINE.100  
 GPNAM[2] SINE.100  
 GPZ1 30.00 %  
 GPZ2 30.00 %  
 P16 1000.00 usec

F1 - Acquisition parameters  
 TD 256  
 SFO1 500.1325 MHz  
 FIDRES 19.531250 Hz

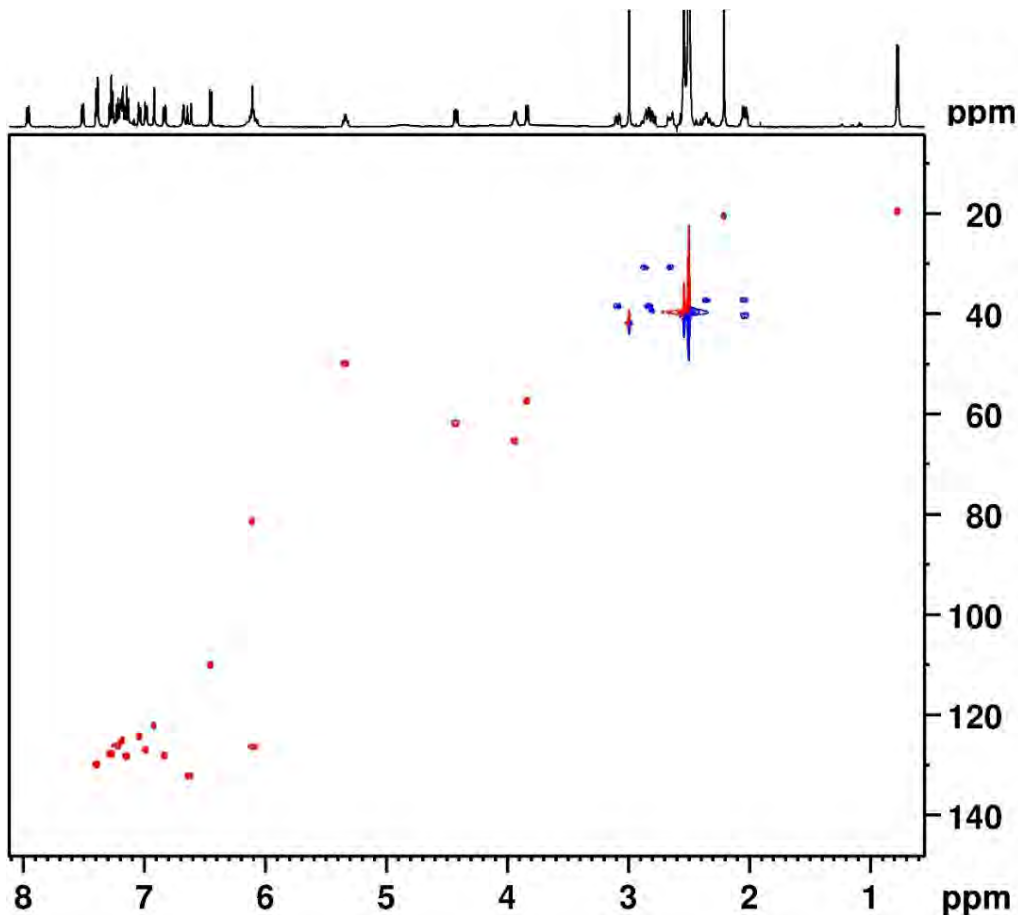

Current Data Parameters  
 NAME KL-5-108-5-1\_AV500  
 EXPNO 5  
 PROCNO 1

F2 - Acquisition Parameters  
 Date 20130110  
 Time 21.05  
 INSTRUM av500  
 PROBHD 5 mm DCH 13C-1  
 PULPROG hsqcadedtpp  
 TD 2048  
 SOLVENT DMSO  
 NS 16  
 DS 16  
 SWH 5000.000 Hz  
 FIDRES 2.441406 Hz  
 AQ 0.2048000 sec  
 RG 202.91  
 DW 100.000 usec  
 DE 10.00 usec  
 TE 298.0 K  
 CNST2 145.0000000  
 D0 0.00000300 sec  
 D1 1.50000000 sec  
 D4 0.00172414 sec  
 D11 0.03000000 sec  
 D13 0.00000400 sec  
 D16 0.00020000 sec  
 D21 0.00345000 sec  
 IN0 0.00001990 sec  
 ZGPTNS

===== CHANNEL f1 =====  
 SFO1 500.1325007 MHz  
 NUC1 1H  
 P1 9.50 usec  
 P2 19.00 usec  
 P28 0 usec  
 PLW1 13.50000000 W

===== CHANNEL f2 =====  
 SFO2 125.7678496 MHz  
 NUC2 13C  
 CPDPRG[2] garp  
 P3 9.63 usec  
 P4 19.26 usec  
 PCPD2 70.00 usec  
 PLW2 23.01399994 W  
 PLW12 0.43557000 W

===== GRADIENT CHANNEL =====  
 GPNAM[1] SMSQ10.100  
 GPNAM[2] SMSQ10.100  
 GPZ1 80.00 %

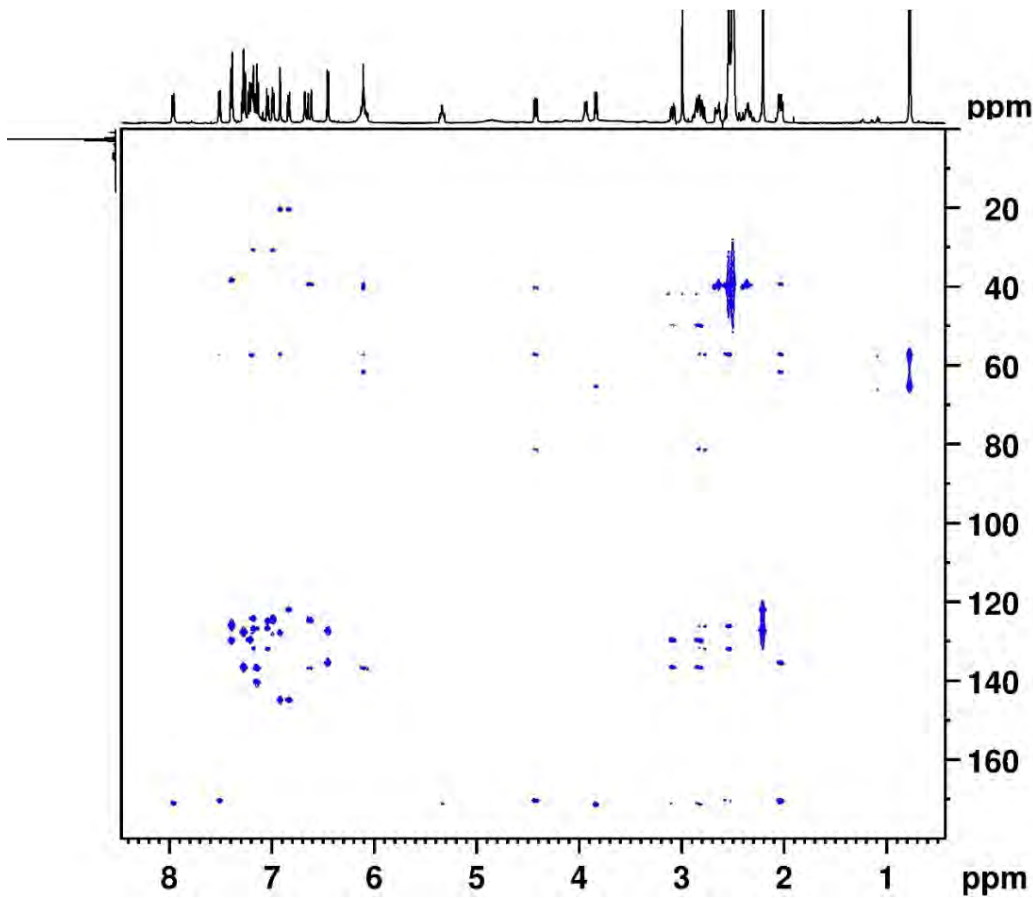

Current Data Parameters  
 NAME KL-5-108-5-1\_AV500  
 EXPNO 6  
 PROCNO 1

F2 - Acquisition Parameters  
 Date 20130110  
 Time 23.03  
 INSTRUM av500  
 PROBHD 5 mm DCH 13C-1  
 PULPROG hmbcgp12ndqf  
 TD 2048  
 SOLVENT DMSO  
 NS 32  
 DS 16  
 SWH 6009.615 Hz  
 FIDRES 2.934382 Hz  
 AQ 0.1703936 sec  
 RG 202.91  
 DW 83.200 usec  
 DE 10.00 usec  
 TE 298.0 K  
 CNST6 120.0000000  
 CNST7 160.0000000  
 CNST13 7.0000000  
 D0 0.00000300 sec  
 D1 1.50000000 sec  
 D6 0.07142857 sec  
 D16 0.00020000 sec  
 IN0 0.00001990 sec

==== CHANNEL f1 =====  
 SFO1 500.1330008 MHz  
 NUC1 1H  
 P1 9.50 usec  
 P2 19.00 usec  
 PLW1 13.50000000 W

==== CHANNEL f2 =====  
 SFO2 125.7703648 MHz  
 NUC2 13C  
 P3 9.63 usec  
 PLW2 23.01399994 W

==== GRADIENT CHANNEL =====  
 GPNAM[1] SMSQ10.100  
 GPNAM[2] SMSQ10.100  
 GPNAM[3] SMSQ10.100  
 GPNAM[4] SMSQ10.100  
 GPNAM[5] SMSQ10.100  
 GPNAM[6] SMSQ10.100  
 GPZ1 50.00 %  
 GPZ2 30.00 %  
 GPZ3 40.10 %

Acyclic Precursor 7

Current Data Parameters  
 NAME ICON-W-B2  
 EXPNO 1  
 PROCNO 1

F2 - Acquisition Parameters  
 Date\_ 20121013  
 Time 13.17  
 INSTRUM av500  
 PROBHD 5 mm DCH 13C-1  
 PULPROG zg30  
 TD 65536  
 SOLVENT DMSO  
 NS 8  
 DS 0  
 SWH 10000.000 Hz  
 FIDRES 0.152588 Hz  
 AQ 3.2767999 sec  
 RG 11  
 DW 50.000 usec  
 DE 10.00 usec  
 TE 298.0 K  
 D1 2.0000000 sec  
 TD0 1

===== CHANNEL f1 =====  
 NUC1 1H  
 P1 10.00 usec  
 PLW1 13.5000000 W  
 SF01 500.1330008 MHz

F2 - Processing parameters  
 SI 65536  
 SF 500.1330000 MHz  
 WDW EM  
 SSB 0  
 LB 0.30 Hz  
 GB 0  
 PC 1.00

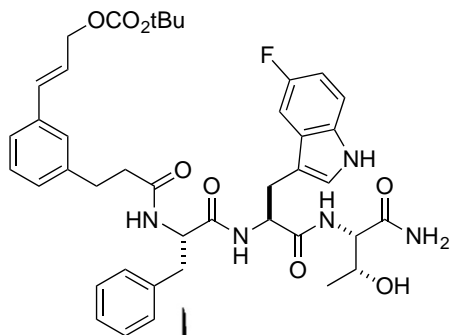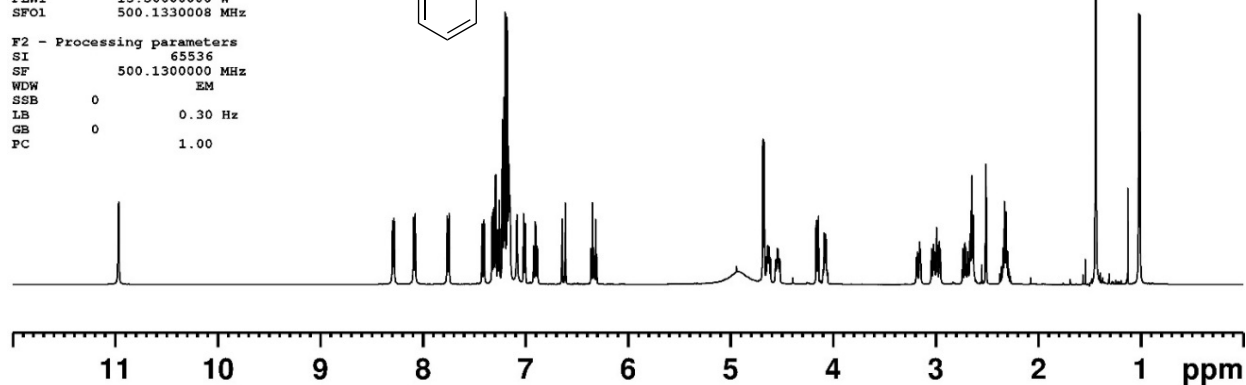

172.05  
 171.54  
 171.37  
 171.33  
 157.62  
 155.79  
 152.79  
 141.65  
 137.85  
 135.78  
 133.42  
 132.69  
 129.13  
 128.57  
 127.90  
 127.61  
 127.54  
 126.37  
 126.11  
 125.92  
 124.12  
 123.22  
 112.14  
 112.06  
 110.23  
 110.19  
 109.00  
 108.80  
 103.32  
 103.14  
 81.48  
 66.87  
 66.35  
 57.99  
 53.71  
 53.48  
 37.45  
 36.70  
 30.89  
 27.34  
 19.92

Current Data Parameters  
 NAME ICON-W-B2  
 EXPNO 2  
 PROCNO 1

F2 - Processing parameters  
 SI 131072  
 SF 125.7578519 MHz  
 WDW EM  
 SSB 0  
 LB 1.00 Hz  
 GB 0  
 PC 1.40

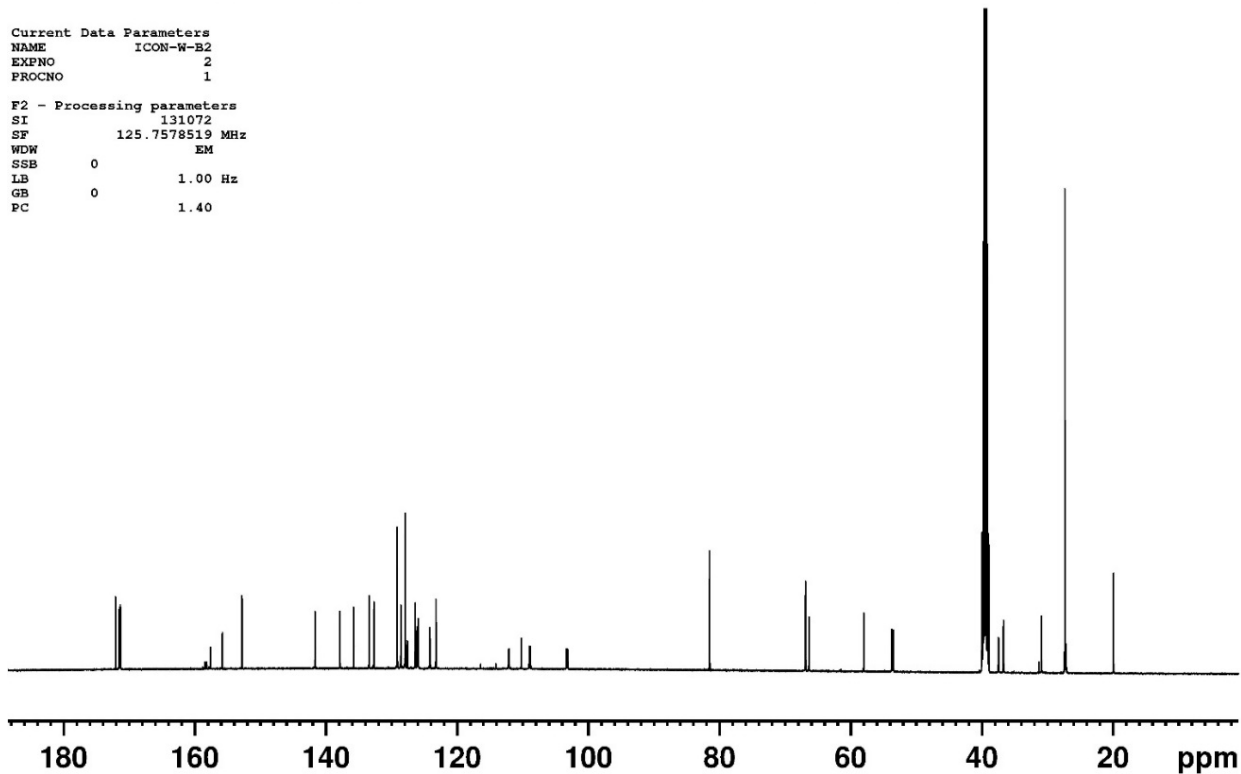

Macrocyclic Product 9a

```

Current Data Parameters
NAME      W-B2-7-2
EXPNO    2
PROCNO   1

F2 - Acquisition Parameters
Date_    20121124
Time     15:09
INSTRUM  av500
PROBHD   5 mm DCH 13C-1
PULPROG  zg
TD       65536
SOLVENT  DMSO
NS       16
DS       0
SWH      10000.000 Hz
FIDRES   0.152588 Hz
AQ       3.2767999 sec
RG       7
DW       50.006 usec
DE       10.00 usec
TE       298.0 K
D1       2.0000000 sec
TD0      1
    
```

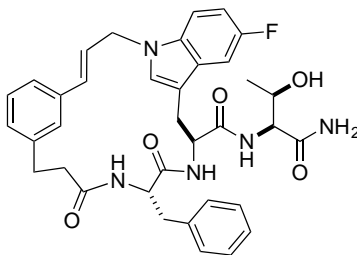

```

===== CHANNEL f1 =====
SFO1   500.1330008 MHz
NUC1    1H
P1     10.00 usec
PLW1   13.50000000 W
    
```

```

F2 - Processing parameters
SI      65536
SF      500.1300146 MHz
WDW     EM
SSB     0
LB      0.30 Hz
GB      0
PC      1.00
    
```

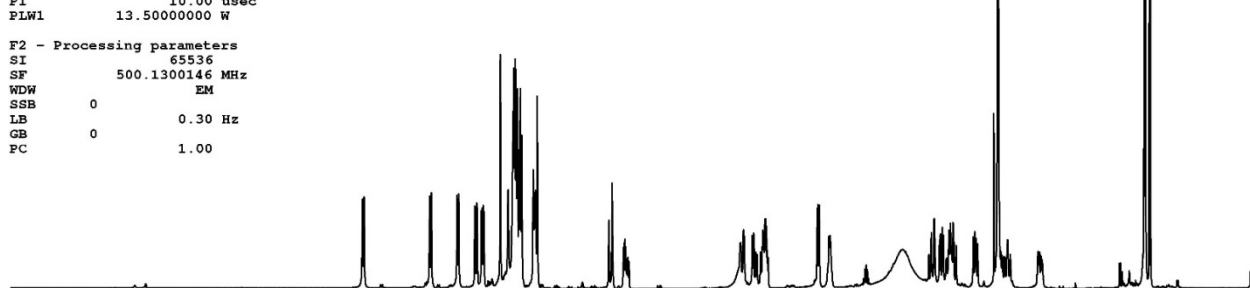

11 10 9 8 7 6 5 4 3 2 1 ppm

```

Current Data Parameters
NAME      W-B2-7-2
EXPNO    3
PROCNO   1
    
```

```

F2 - Acquisition Parameters
Date_    20121124
Time     15:10
INSTRUM  av500
PROBHD   5 mm DCH 13C-1
PULPROG  cosygpmfph
TD       4096
SOLVENT  DMSO
NS       2
DS       8
SWH      5498.534 Hz
FIDRES   1.342415 Hz
AQ       0.3724629 sec
RG       202.91
DW       90.933 usec
DE       10.00 usec
TE       298.0 K
D0       0.00007817 sec
D1       2.00000000 sec
D13      0.00004000 sec
D16      0.00020000 sec
IN0      0.00018180 sec
    
```

```

===== CHANNEL f1 =====
SFO1   500.1327507 MHz
NUC1    1H
P1     10.00 usec
P2     20.00 usec
PLW1   13.50000000 W
    
```

```

===== GRADIENT CHANNEL =====
GPNAM[1] SMSQ10.100
GPNAM[2] SMSQ10.100
GPZ1    10.00 %
GPZ2    20.00 %
P16     1000.00 usec
    
```

```

F1 - Acquisition parameters
TD       256
SFO1     500.1328 MHz
FIDRES   21.486525 Hz
SW       10.998 ppm
FnMODE   States-TPPI
    
```

```

F2 - Processing parameters
SI       2048
SF       500.1300135 MHz
WDW      SINE
SSB      1
    
```

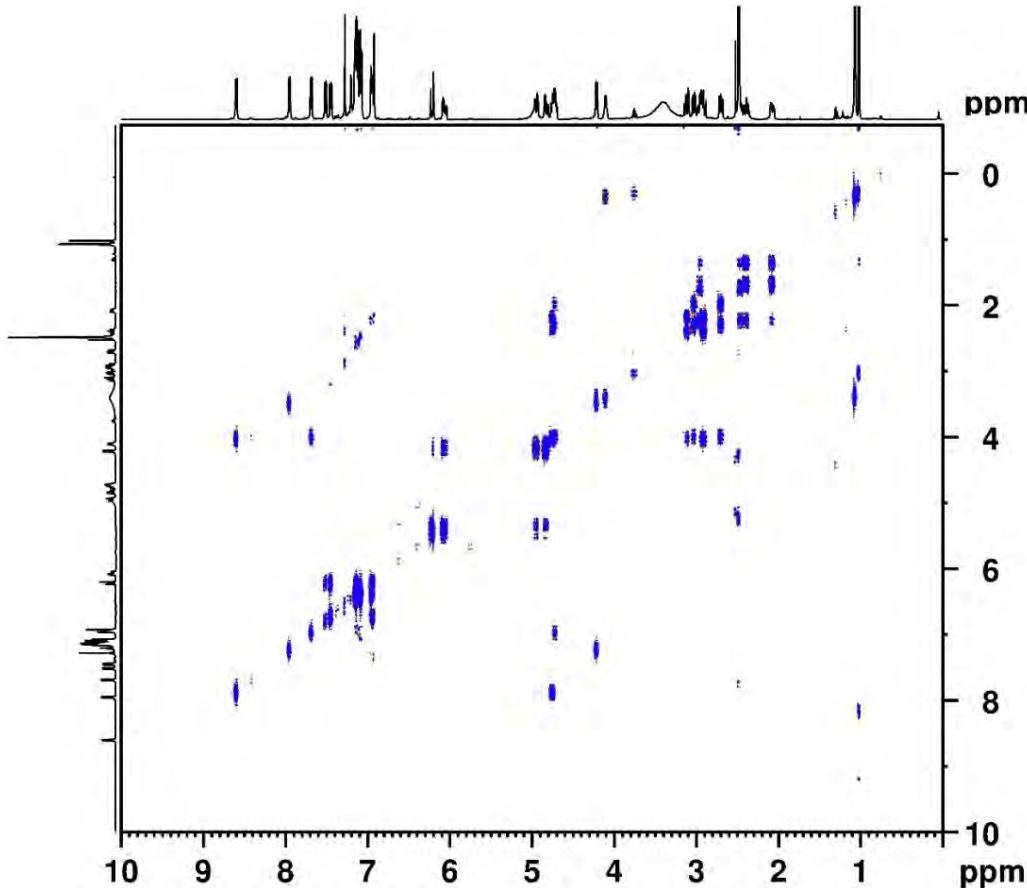



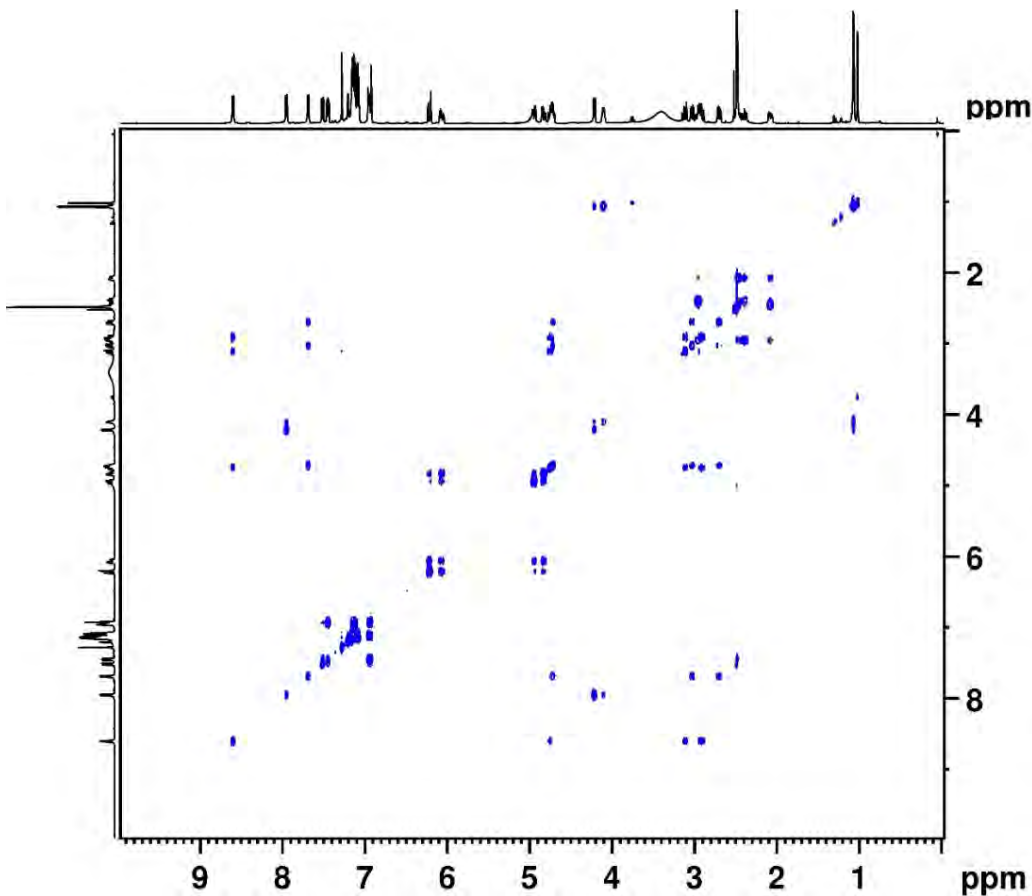

```

Current Data Parameters
NAME      W-B2-7-2
EXPNO    4
PROCNO   1

F2 - Acquisition Parameters
Date_    20121124
Time     15.31
INSTRUM  av500
PROBHD   5 mm DCH 13C-1
PULPROG  mlevetgp.js
TD       2048
SOLVENT  DMSO
NS       2
DS       8
SWH      5000.000 Hz
FIDRES   2.441406 Hz
AQ       0.2048000 sec
RG       37.94
DW       100.000 usec
DE       10.00 usec
TE       298.0 K
D0       0.00000300 sec
D1       2.00000000 sec
D9       0.06000000 sec
D11      0.03000000 sec
D12      0.00002000 sec
D16      0.00020000 sec
IN0      0.00020000 sec
L1       24
  
```

```

===== CHANNEL f1 =====
SFO1    500.1325007 MHz
NUC1     1H
P1       10.00 usec
P2       20.00 usec
P5       26.68 usec
P6       40.00 usec
P7       80.00 usec
P17      2500.00 usec
PLW1     13.50000000 W
PLW10    0.84375000 W

===== GRADIENT CHANNEL =====
GPNAM[1] SINE.100
GPNAM[2] SINE.100
GPZ1     30.00 %
GPZ2     30.00 %
P16      1000.00 usec
  
```

```

F1 - Acquisition parameters
TD       256
SFO1     500.1325 MHz
FIDRES   19.531250 Hz
  
```

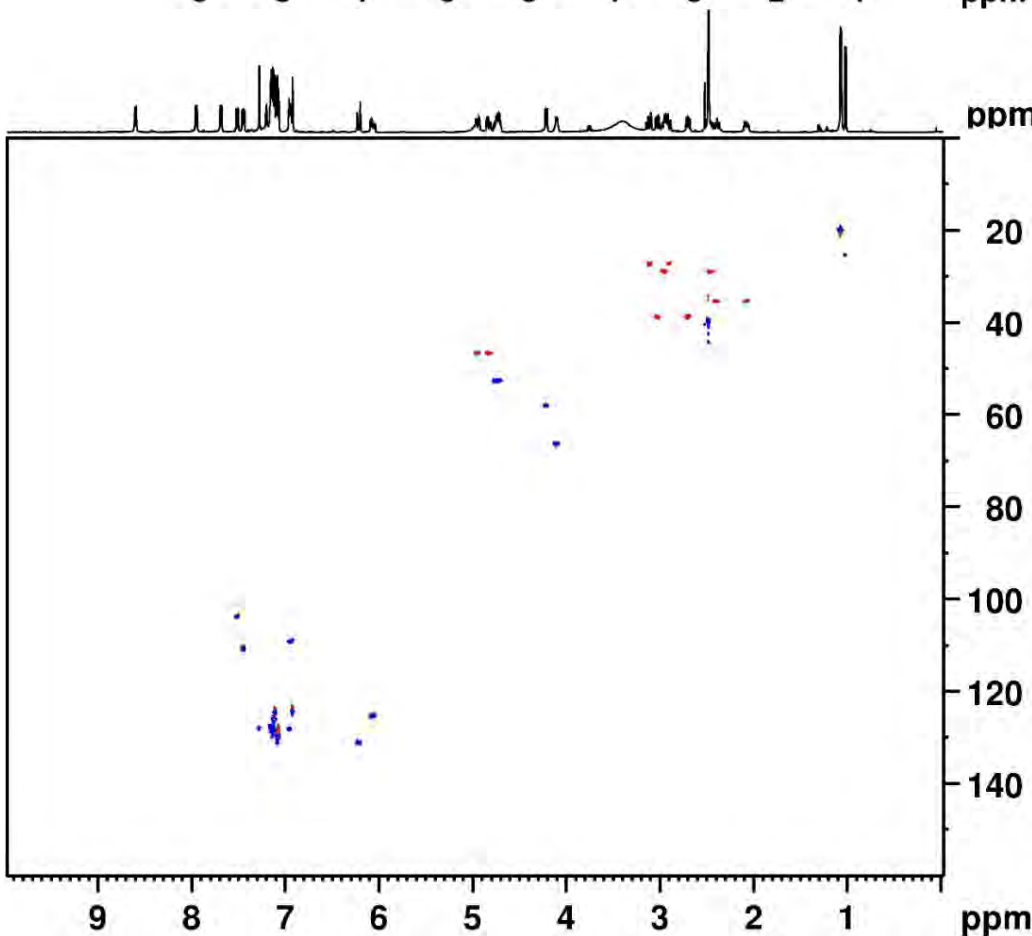

```

Current Data Parameters
NAME      W-B2-7-2
EXPNO    5
PROCNO   1
  
```

```

F2 - Acquisition Parameters
Date_    20121124
Time     15.51
INSTRUM  av500
PROBHD   5 mm DCH 13C-1
PULPROG  hsqcedetgp
TD       2048
SOLVENT  DMSO
NS       2
DS       16
SWH      5000.000 Hz
FIDRES   2.441406 Hz
AQ       0.2048000 sec
RG       202.91
DW       100.000 usec
DE       10.00 usec
TE       298.0 K
CNST2    145.0000000
D0       0.00000300 sec
D1       1.50000000 sec
D4       0.00172414 sec
D11      0.03000000 sec
D13      0.00000400 sec
D16      0.00020000 sec
D21      0.00345000 sec
IN0      0.00001990 sec
ZGOPTNS
  
```

```

===== CHANNEL f1 =====
SFO1    500.1325007 MHz
NUC1     1H
P1       10.00 usec
P2       20.00 usec
P28      0 usec
PLW1     13.50000000 W
  
```

```

===== CHANNEL f2 =====
SFO2    125.7678496 MHz
NUC2     13C
CPDPRG[2] garp
P3       9.63 usec
P4       19.26 usec
PCPD2    70.00 usec
PLW2     23.01399994 W
PLW12    0.43557000 W
  
```

```

===== GRADIENT CHANNEL =====
GPNAM[1] SMSQ10.100
GPNAM[2] SMSQ10.100
GPZ1     80.00 %
  
```

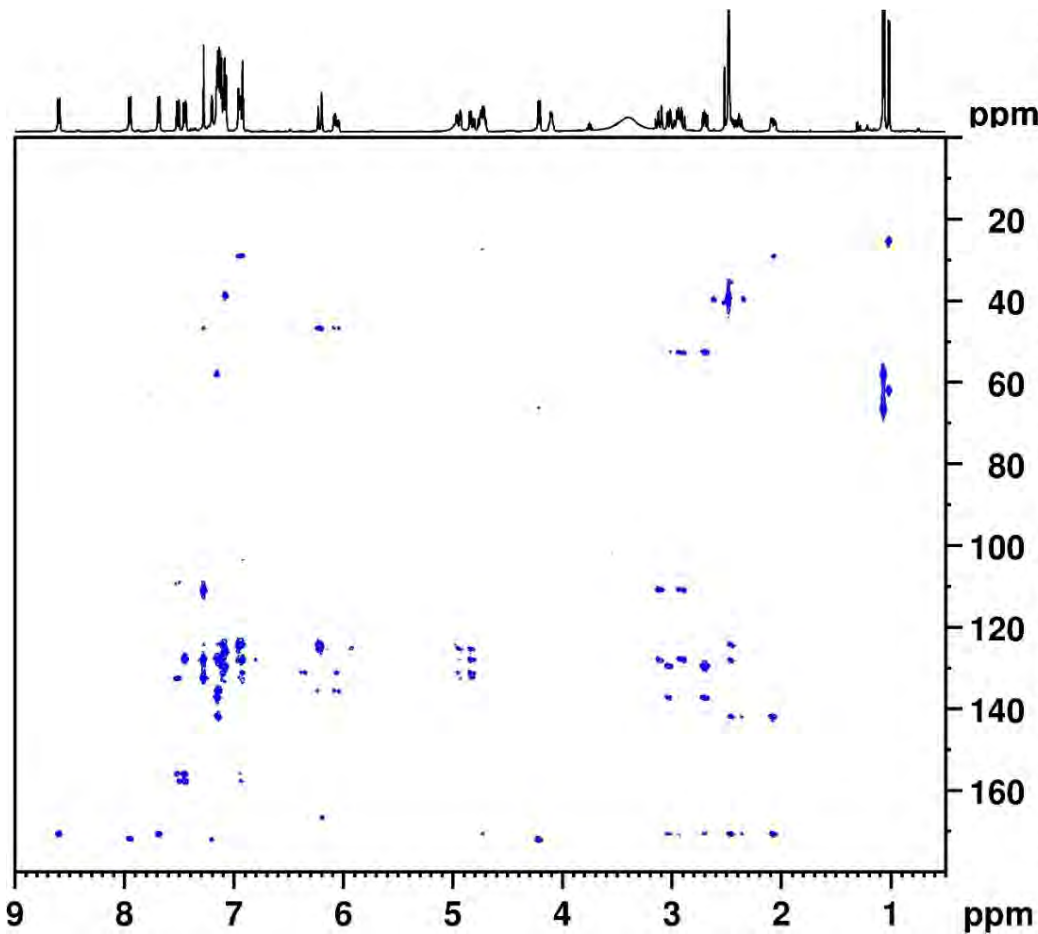

```

Current Data Parameters
NAME          W-B2-7-2
EXPNO         6
PROCNO        1

F2 - Acquisition Parameters
Date_         20121124
Time          16.07
INSTRUM       av500
PROBHD        5 mm DCH 13C-1
PULPROG       hmbcgp12ndqf
TD            2048
SOLVENT       DMSO
NS            4
DS            16
SWH           6009.615 Hz
FIDRES        2.934382 Hz
AQ            0.1703936 sec
RG            202.91
DW            83.200 usec
DE            10.00 usec
TE            298.0 K
CNST6         120.0000000
CNST7         160.0000000
CNST13        7.0000000
D0            0.00000300 sec
D1            1.50000000 sec
D6            0.07142857 sec
D16           0.00020000 sec
IN0           0.00001990 sec

===== CHANNEL f1 =====
SFO1          500.1330008 MHz
NUC1           1H
P1             10.00 usec
P2             20.00 usec
PLW1          13.50000000 W

===== CHANNEL f2 =====
SFO2          125.7703648 MHz
NUC2           13C
P3              9.63 usec
PLW2          23.01399994 W

===== GRADIENT CHANNEL =====
GPNAM[1]      SMSQ10.100
GPNAM[2]      SMSQ10.100
GPNAM[3]      SMSQ10.100
GPNAM[4]      SMSQ10.100
GPNAM[5]      SMSQ10.100
GPNAM[6]      SMSQ10.100
GPZ1           50.00 %
GPZ2           30.00 %
GPZ3           40.10 %
GPZ4           15.00 %

```

Macrocyclic Product 9b

```

Current Data Parameters
NAME      W-B2-3
EXPNO    2
PROCNO   1

F2 - Acquisition Parameters
Date_    20121110
Time     14.34
INSTRUM  av500
PROBHD   5 mm DCH 13C-1
PULPROG  zg
TD        65536
SOLVENT  DMSO
NS        8
DS        0
SWH       10000.000 Hz
FIDRES    0.152588 Hz
AQ        3.2767999 sec
RG        7
DW        50.000 usec
DE        10.00 usec
TE        298.0 K
D1        2.0000000 sec
TDO       1
    
```

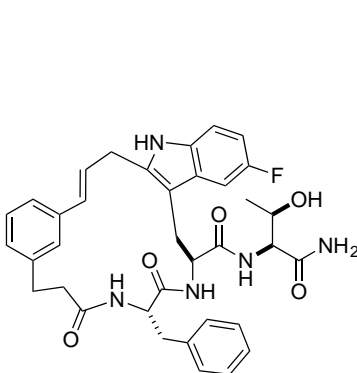

```

===== CHANNEL f1 =====
NUC1     1H
P1       10.00 usec
PLW1     13.5000000 W
SFO1     500.1330008 MHz

F2 - Processing parameters
SI       65536
SF       500.1300146 MHz
WDW      EM
SSB      0
LB       0.30 Hz
GB       0
PC       1.00
    
```

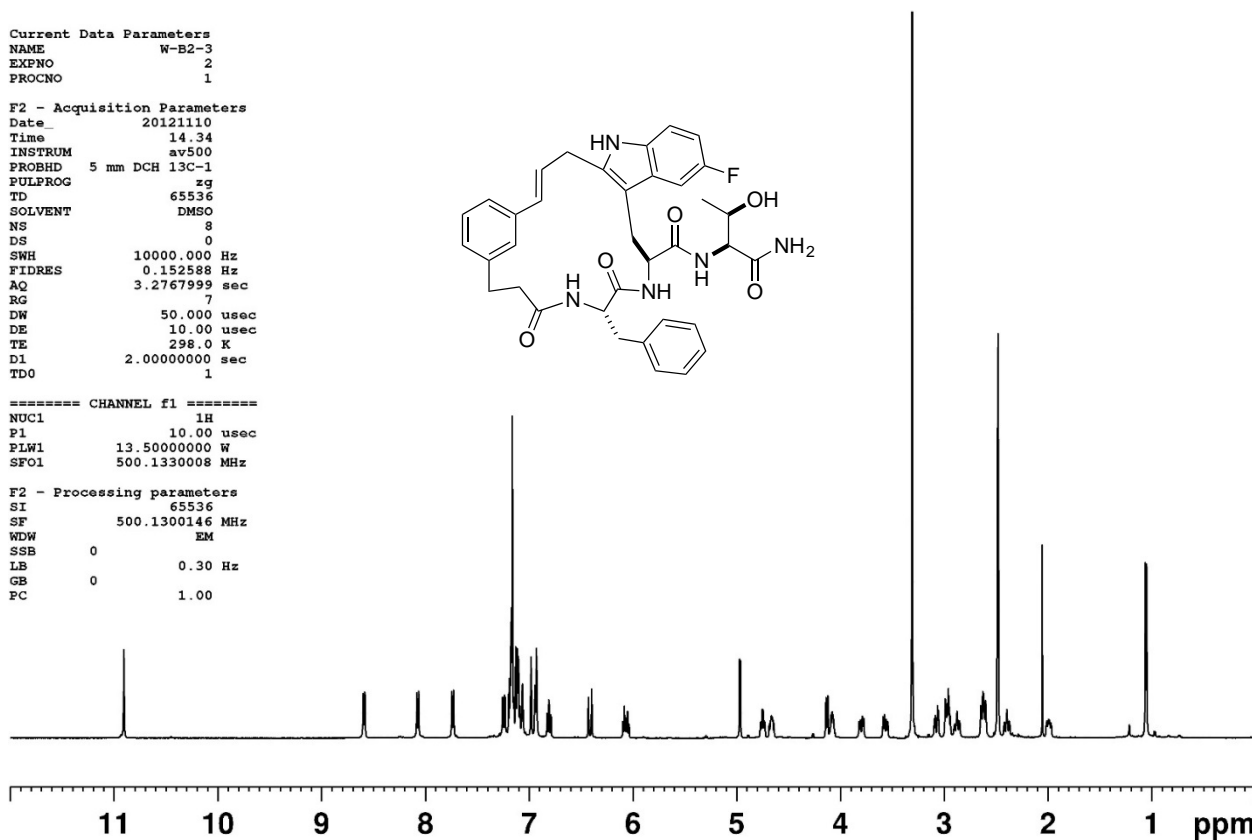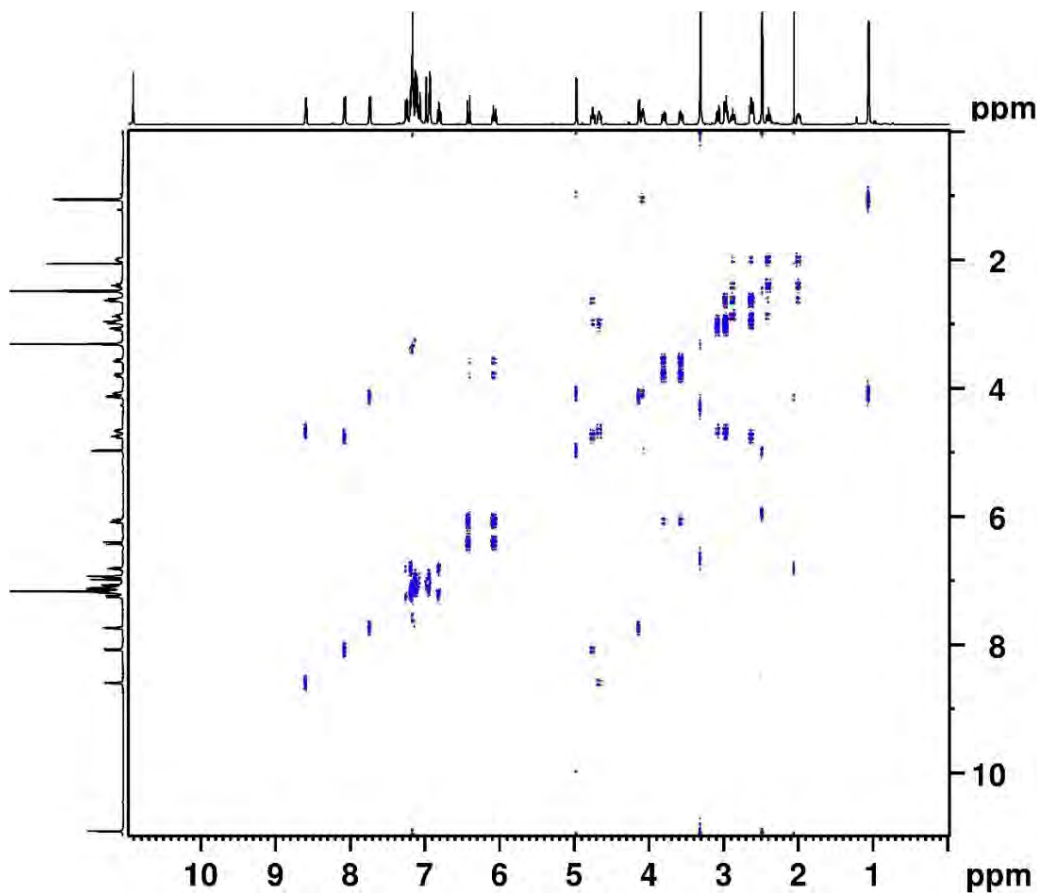

```

Current Data Parameters
NAME      W-B2-3
EXPNO    3
PROCNO   1
    
```

```

F2 - Acquisition Parameters
Date_    20121110
Time     14.35
INSTRUM  av500
PROBHD   5 mm DCH 13C-1
PULPROG  cosygpmfph
TD        4096
SOLVENT  DMSO
NS        2
DS        8
SWH       5498.534 Hz
FIDRES    1.342415 Hz
AQ        0.3724629 sec
RG        202.91
DW        90.933 usec
DE        10.00 usec
TE        298.0 K
DO        0.00007815 sec
D1        2.0000000 sec
D13       0.0000400 sec
D16       0.0020000 sec
IN0       0.00018175 sec
    
```

```

===== CHANNEL f1 =====
NUC1     1H
P1       10.00 usec
P2       20.00 usec
PLW1     13.5000000 W
SFO1     500.1327507 MHz

===== GRADIENT CHANNEL =====
GPNAM[1] SMSQ10.100
GPNAM[2] SMSQ10.100
GPZ1     10.00 %
GPZ2     20.00 %
P16      1000.00 usec
    
```

```

F1 - Acquisition parameters
TD        256
SFO1     500.1328 MHz
FIDRES    21.490080 Hz
SW        11.000 ppm
FnMODE    States-TPPI
    
```

```

F2 - Processing parameters
SI        2048
SF        500.1300135 MHz
WDW       SINE
SSB       1
    
```

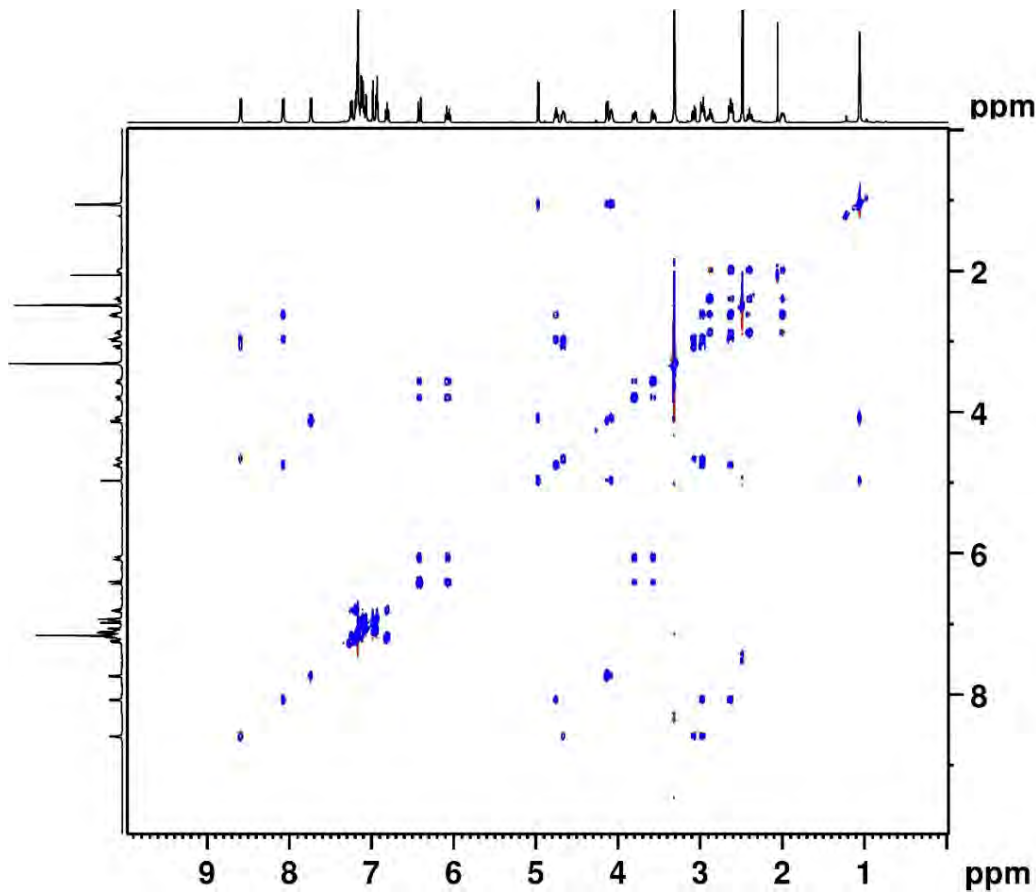

```

Current Data Parameters
NAME          W-B2-3
EXPNO        4
PROCNO       1

F2 - Acquisition Parameters
Date_        20121110
Time         14.55
INSTRUM      av500
PROBHD       5 mm DCH 13C-1
PULPROG      mlevetgp.js
TD           2048
SOLVENT      DMSO
NS           2
DS           8
SWH          5000.000 Hz
FIDRES       2.441406 Hz
AQ           0.2048000 sec
RG           37.94
DW           100.000 usec
DE           10.00 usec
TE           298.0 K
D0           0.00000300 sec
D1           2.00000000 sec
D9           0.06000000 sec
D11          0.03000000 sec
D12          0.00002000 sec
D16          0.00020000 sec
IN0          0.00019995 sec
L1           24

===== CHANNEL f1 =====
NUC1         1H
P1           10.00 usec
P2           20.00 usec
P5           26.68 usec
P6           40.00 usec
P7           80.00 usec
P17          2500.00 usec
PLW1         13.50000000 W
PLW10        0.84375000 W
SFO1         500.1325007 MHz

===== GRADIENT CHANNEL =====
GPNAM[1]     SINE.100
GPNAM[2]     SINE.100
GPZ1         30.00 %
GPZ2         30.00 %
P16          1000.00 usec

F1 - Acquisition parameters
TD           256
SFO1         500.1325 MHz
FIDRES       19.536406 Hz

```

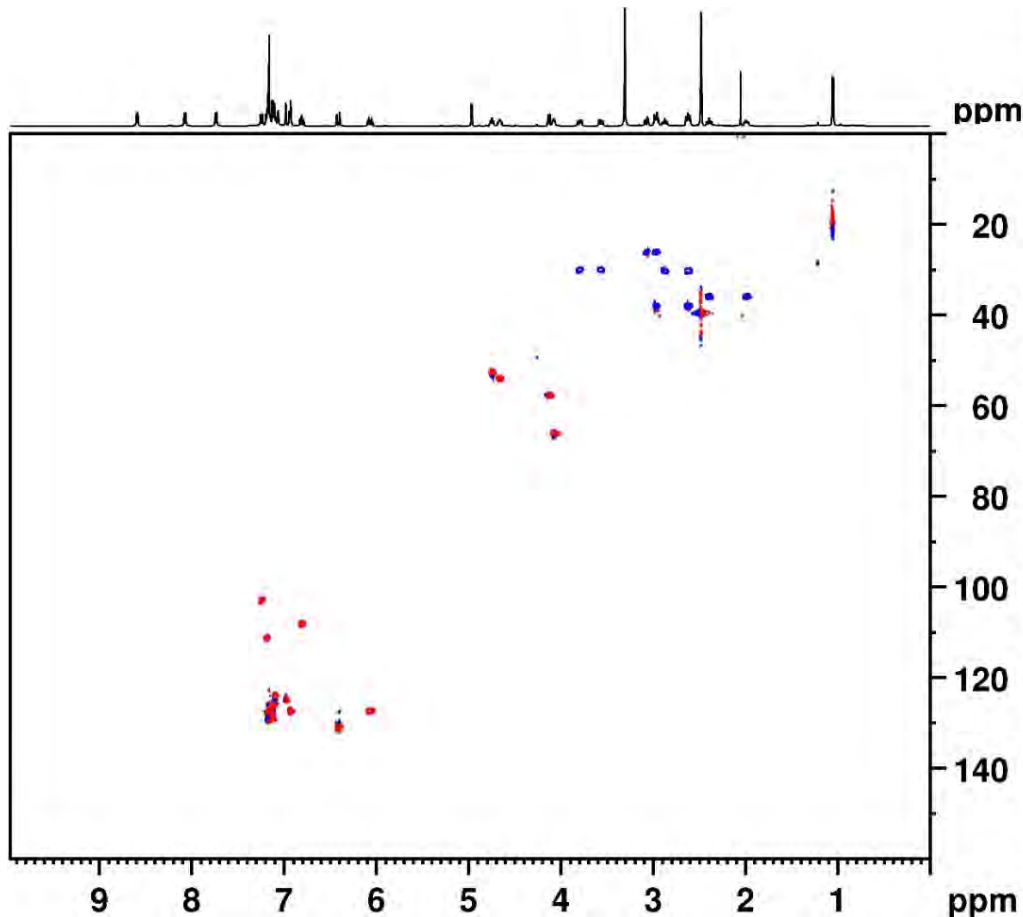

```

Current Data Parameters
NAME          W-B2-3
EXPNO        5
PROCNO       1

F2 - Acquisition Parameters
Date_        20121110
Time         15.16
INSTRUM      av500
PROBHD       5 mm DCH 13C-1
PULPROG      hsqcedetgp
TD           2048
SOLVENT      DMSO
NS           2
DS           16
SWH          5000.000 Hz
FIDRES       2.441406 Hz
AQ           0.2048000 sec
RG           202.91
DW           100.000 usec
DE           10.00 usec
TE           298.0 K
CNST2        145.0000000
D0           0.00000300 sec
D1           1.50000000 sec
D4           0.00172414 sec
D11          0.03000000 sec
D13          0.00000400 sec
D16          0.00020000 sec
D21          0.00345000 sec
IN0          0.00001990 sec
ZGOPTNS

===== CHANNEL f1 =====
NUC1         1H
P1           10.00 usec
P2           20.00 usec
P28          0 usec
PLW1         13.50000000 W
SFO1         500.1325007 MHz

===== CHANNEL f2 =====
CPDPRG[2]    garp
NUC2         13C
P3           9.63 usec
P4           19.26 usec
PCPD2        70.00 usec
PLW2         23.01399994 W
PLW12        0.43557000 W
SFO2         125.7678496 MHz

===== GRADIENT CHANNEL =====
GPNAM[1]     SMSQ10.100
GPNAM[2]     SMSQ10.100
GPZ1         80.00 %

```

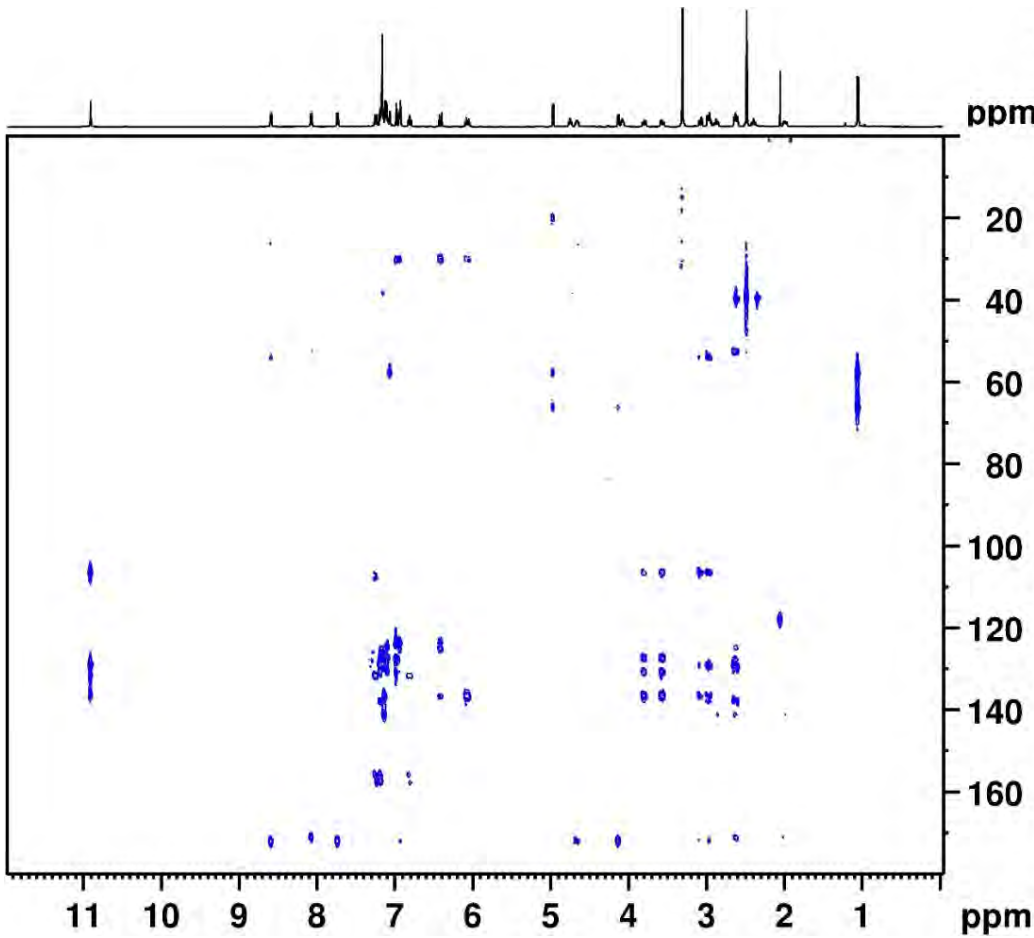

```

Current Data Parameters
NAME           W-B2-3
EXPNO         6
PROCNO        1

F2 - Acquisition Parameters
Date_         20121110
Time          15.31
INSTRUM       av500
PROBHD        5 mm DCH 13C-1
PULPROG       hmbcgp12ndqf
TD            2048
SOLVENT       DMSO
NS            2
DS            16
SWH           6009.615 Hz
FIDRES        2.934382 Hz
AQ            0.1703936 sec
RG            202.91
DW            83.200 usec
DE            10.00 usec
TE            298.0 K
CNST6         120.0000000
CNST7         160.0000000
CNST13        7.0000000
D0            0.00000300 sec
D1            1.50000000 sec
D6            0.07142857 sec
D16           0.00020000 sec
IN0           0.00001990 sec

===== CHANNEL f1 =====
NUC1           1H
P1             10.00 usec
P2             20.00 usec
PLW1           13.50000000 W
SFO1           500.1330008 MHz

===== CHANNEL f2 =====
NUC2           13C
P3              9.63 usec
PLW2           23.01399994 W
SFO2           125.7703648 MHz

===== GRADIENT CHANNEL =====
GPNAM[1]       SMSQ10.100
GPNAM[2]       SMSQ10.100
GPNAM[3]       SMSQ10.100
GPNAM[4]       SMSQ10.100
GPNAM[5]       SMSQ10.100
GPNAM[6]       SMSQ10.100
GPZ1           50.00 %
GPZ2           30.00 %
GPZ3           40.10 %
GPZ4           15.00 %

```

Macrocyclic Product 9c

```

Current Data Parameters
NAME      W-B2-5(09-2013)
EXPNO    2
PROCNO   1

F2 - Acquisition Parameters
Date_    20130911
Time     19.50
INSTRUM av600
PROBHD   5 mm TBI5
PULPROG  zg
TD        65536
SOLVENT  DMSO
NS        32
DS        0
SWH       12376.237 Hz
FIDRES    0.188846 Hz
AQ        2.6476543 sec
RG        574.7
DW        40.400 usec
DE        6.50 usec
TE        294.5 K
D1        2.0000000 sec
TDO       1
  
```

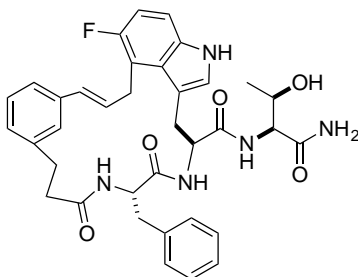

```

===== CHANNEL f1 =====
NUC1      1H
P1        10.10 usec
PL1       -2.00 dB
PL1W      39.81071854 W
SFO1      600.1336008 MHz

F2 - Processing parameters
SI        65536
SF        600.1300273 MHz
WDW       EM
SSB       0
LB        0.30 Hz
GB        0
PC        1.00
  
```

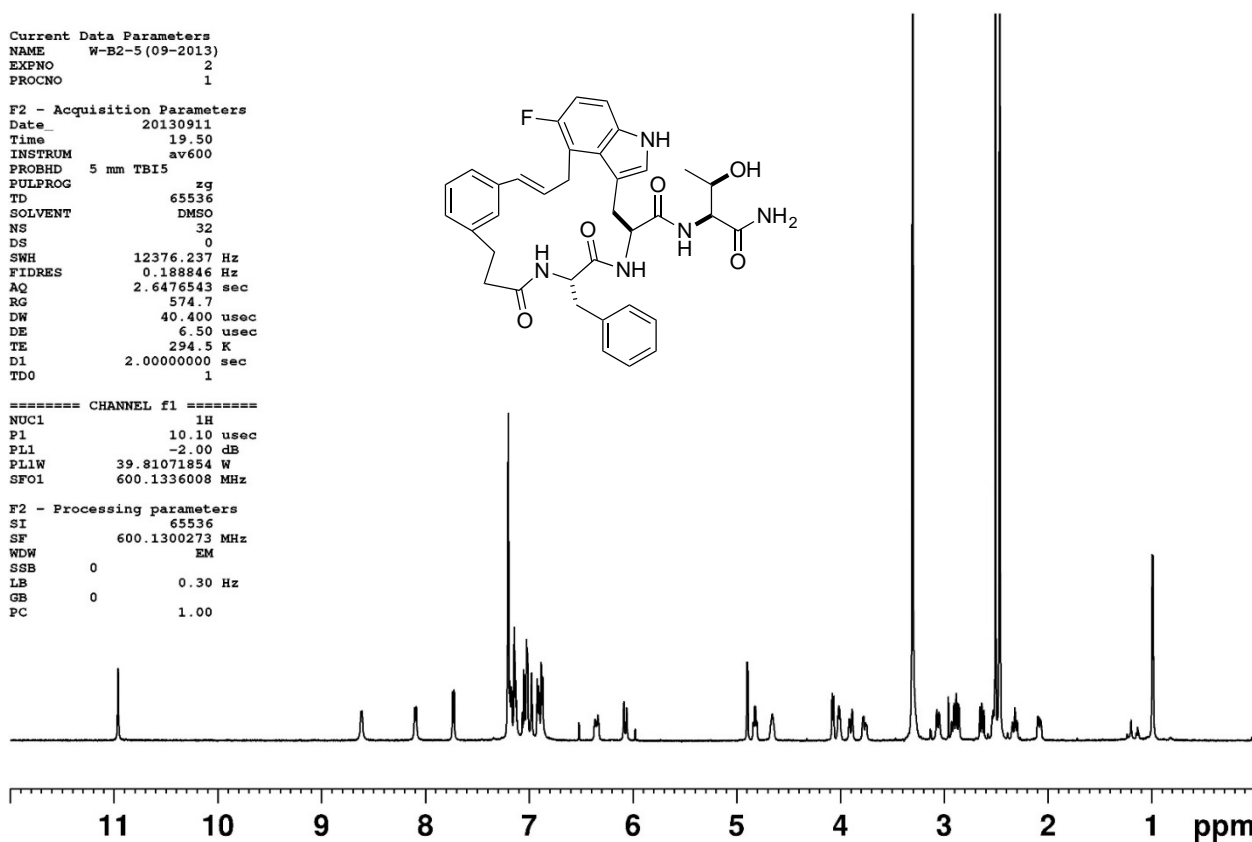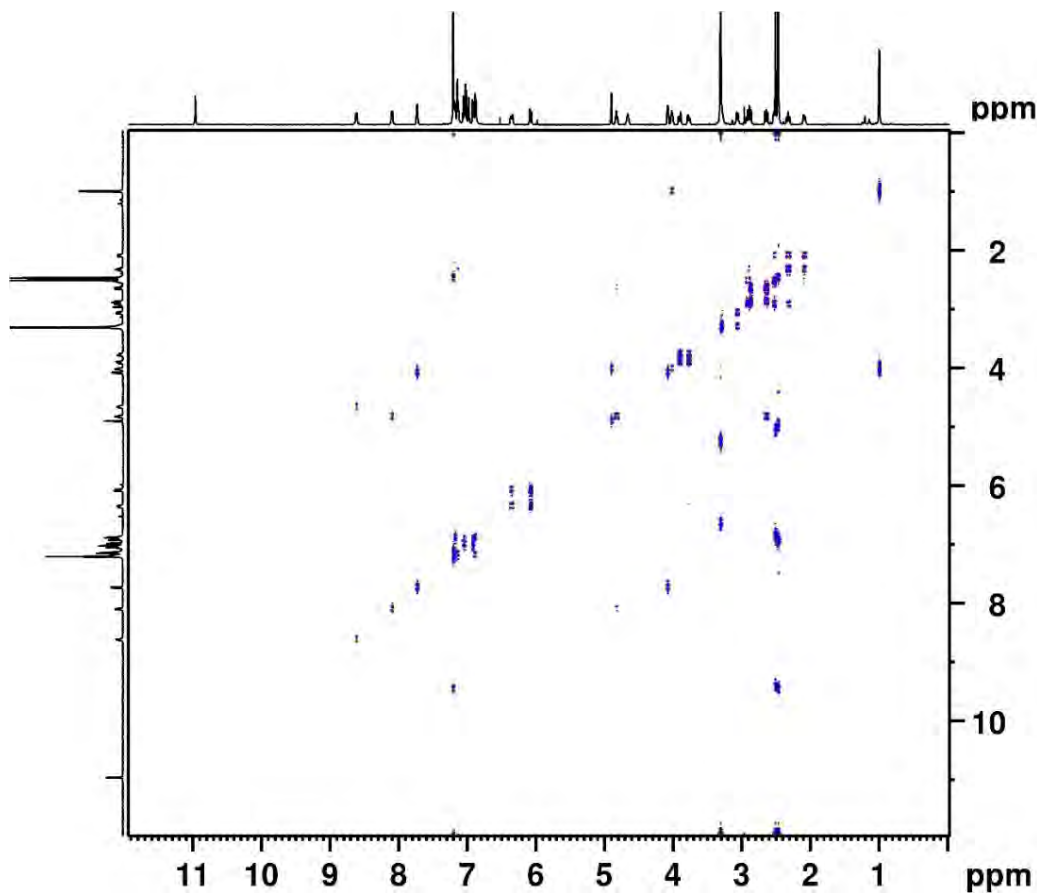

```

Current Data Parameters
NAME      W-B2-5(09-2013)
EXPNO    4
PROCNO   1

F2 - Acquisition Parameters
Date_    20130911
Time     20.23
INSTRUM av600
PROBHD   5 mm TBI5
PULPROG  cosygpmfph
TD        2048
SOLVENT  DMSO
NS        2
DS        16
SWH       7183.908 Hz
FIDRES    3.507768 Hz
AQ        0.1425408 sec
RG        181
DW        69.600 usec
DE        6.50 usec
TE        294.7 K
D0        0.00005657 sec
D1        2.0000000 sec
D13       0.0000400 sec
D16       0.0020000 sec
IN0       0.00013885 sec

===== CHANNEL f1 =====
NUC1      1H
P1        10.10 usec
P2        20.20 usec
PL1       -2.00 dB
PL1W      39.81071854 W
SFO1      600.1336008 MHz

===== GRADIENT CHANNEL =====
GPNAM[1]  SINE.100
GPNAM[2]  SINE.100
GPX1      0 %
GPX2      0 %
GPY1      0 %
GPY2      0 %
GPZ1      10.00 %
GPZ2      20.00 %
P16       1000.00 usec

F1 - Acquisition parameters
TD        256
SFO1      600.1336 MHz
FIDRES    28.131262 Hz
SW        12.000 ppm
FnMODE    States-TPPI
  
```



```

Current Data Parameters
NAME          W-B2-3
EXPNO        4
PROCNO       1

F2 - Acquisition Parameters
Date_        20121110
Time         14.55
INSTRUM      av500
PROBHD       5 mm DCH 13C-1
PULPROG      mlevetgp.js
TD           2048
SOLVENT      DMSO
NS           2
DS           8
SWH          5000.000 Hz
FIDRES       2.441406 Hz
AQ           0.2048000 sec
RG           37.94
DW           100.000 usec
DE           10.00 usec
TE           298.0 K
D0           0.00000300 sec
D1           2.00000000 sec
D9           0.06000000 sec
D11          0.03000000 sec
D12          0.00002000 sec
D16          0.00020000 sec
IN0          0.00019995 sec
L1           24

===== CHANNEL f1 =====
NUC1         1H
P1           10.00 usec
P2           20.00 usec
P5           26.68 usec
P6           40.00 usec
P7           80.00 usec
P17          2500.00 usec
PLW1         13.50000000 W
PLW10        0.84375000 W
SFO1         500.1325007 MHz

===== GRADIENT CHANNEL =====
GPNAM[1]     SINE.100
GPNAM[2]     SINE.100
GPZ1         30.00 %
GPZ2         30.00 %
PL6          1000.00 usec

F1 - Acquisition parameters
TD           256
SFO1         500.1325 MHz
FIDRES       19.536406 Hz

```

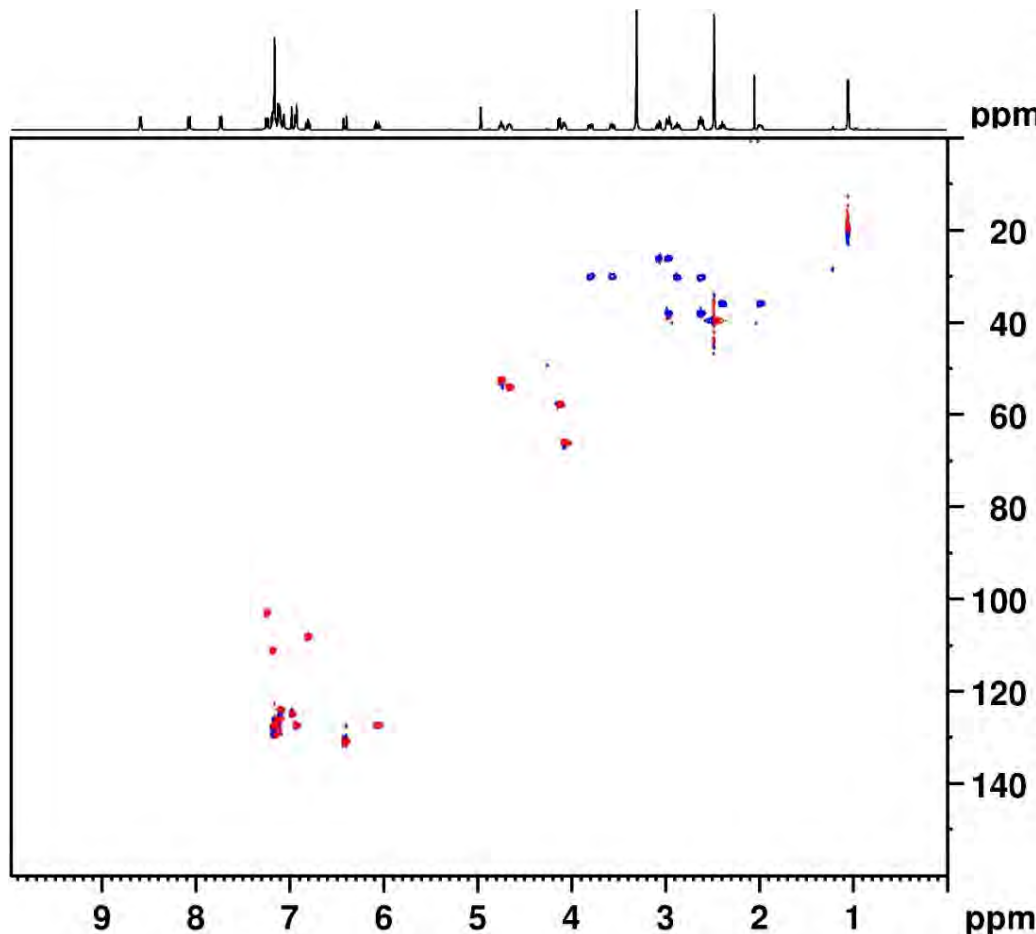

```

Current Data Parameters
NAME          W-B2-3
EXPNO        5
PROCNO       1

F2 - Acquisition Parameters
Date_        20121110
Time         15.16
INSTRUM      av500
PROBHD       5 mm DCH 13C-1
PULPROG      hsqcedetgp
TD           2048
SOLVENT      DMSO
NS           2
DS           16
SWH          5000.000 Hz
FIDRES       2.441406 Hz
AQ           0.2048000 sec
RG           202.91
DW           100.000 usec
DE           10.00 usec
TE           298.0 K
CNST2        145.0000000
D0           0.00000300 sec
D1           1.50000000 sec
D4           0.00172414 sec
D11          0.03000000 sec
D13          0.00000400 sec
D16          0.00020000 sec
D21          0.00345000 sec
IN0          0.00001990 sec
ZGOPTNS

===== CHANNEL f1 =====
NUC1         1H
P1           10.00 usec
P2           20.00 usec
P28          0 usec
PLW1         13.50000000 W
SFO1         500.1325007 MHz

===== CHANNEL f2 =====
CPDPRG[2]    garp
NUC2         13C
P3           9.63 usec
P4           19.26 usec
PCPD2        70.00 usec
PLW2         23.01399994 W
PLW12        0.43557000 W
SFO2         125.7678496 MHz

===== GRADIENT CHANNEL =====
GPNAM[1]     SMSQ10.100
GPNAM[2]     SMSQ10.100
GPZ1         80.00 %

```



```

Current Data Parameters
NAME          W-B2-3
EXPNO         6
PROCNO        1

F2 - Acquisition Parameters
Date_         20121110
Time          15.31
INSTRUM       av500
PROBHD        5 mm DCH 13C-1
PULPROG       hmbcgp12ndqf
TD            2048
SOLVENT       DMSO
NS            2
DS            16
SWH           6009.615 Hz
FIDRES        2.934382 Hz
AQ            0.1703936 sec
RG            202.91
DW            83.200 usec
DE            10.00 usec
TE            298.0 K
CNST6         120.0000000
CNST7         160.0000000
CNST13        7.0000000
D0            0.00000300 sec
D1            1.50000000 sec
D6            0.07142857 sec
D16           0.00020000 sec
IN0           0.00001990 sec

===== CHANNEL f1 =====
NUC1           1H
P1             10.00 usec
P2             20.00 usec
PLW1          13.50000000 W
SFO1          500.1330008 MHz

===== CHANNEL f2 =====
NUC2           13C
P3             9.63 usec
PLW2          23.01399994 W
SFO2          125.7703648 MHz

===== GRADIENT CHANNEL =====
GPNAM[1]       SMSQ10.100
GPNAM[2]       SMSQ10.100
GPNAM[3]       SMSQ10.100
GPNAM[4]       SMSQ10.100
GPNAM[5]       SMSQ10.100
GPNAM[6]       SMSQ10.100
GPZ1           50.00 %
GPZ2           30.00 %
GPZ3           40.10 %
GPZ4           15.00 %

```



Macrocyclic Product **9d**

```

Current Data Parameters
NAME      W-B2-7-3_AV600
EXPNO     1
PROCNO    1

F2 - Acquisition Parameters
Date_     20121213
Time      17.19
INSTRUM   av600
PROBHD    5 mm TBI5
PULPROG   zg30
TD         65536
SOLVENT   DMSO
NS         8
DS         0
SWH        24038.461 Hz
FIDRES     0.366798 Hz
AQ         1.3631488 sec
RG         181
DW         20.800 usec
DE         6.50 usec
TE         294.5 K
D1         2.0000000 sec
TD0        1

===== CHANNEL f1 =====
NUC1       1H
P1         9.10 usec
PL1        -2.00 dB
PLLW       39.81071854 W
SFO1       600.1336008 MHz

F2 - Processing parameters
SI         65536
SF         600.1300074 MHz
WDW        EM
SSB        0
LB         0.30 Hz
GB         0
PC         1.00
    
```

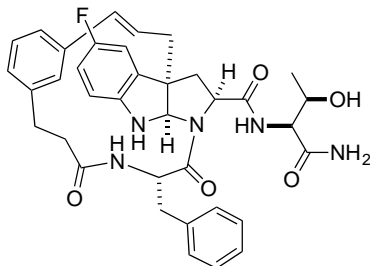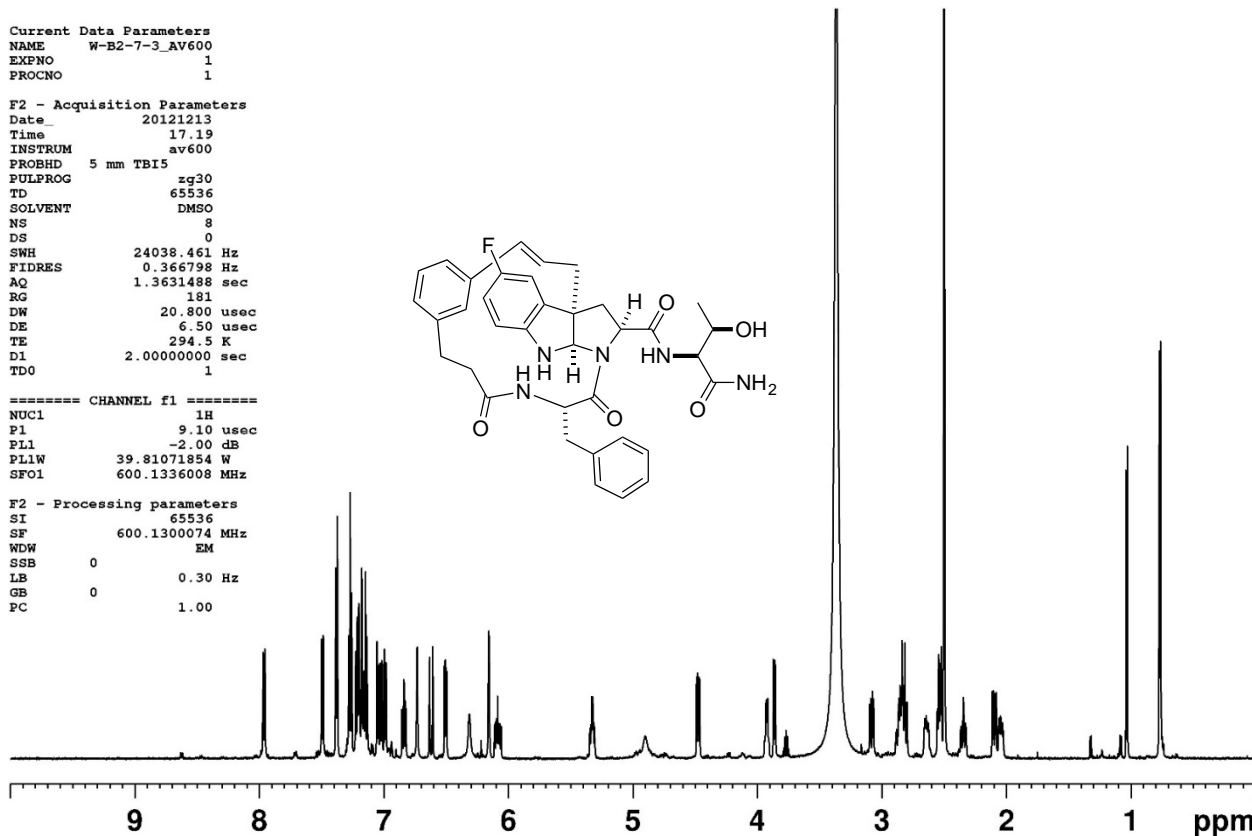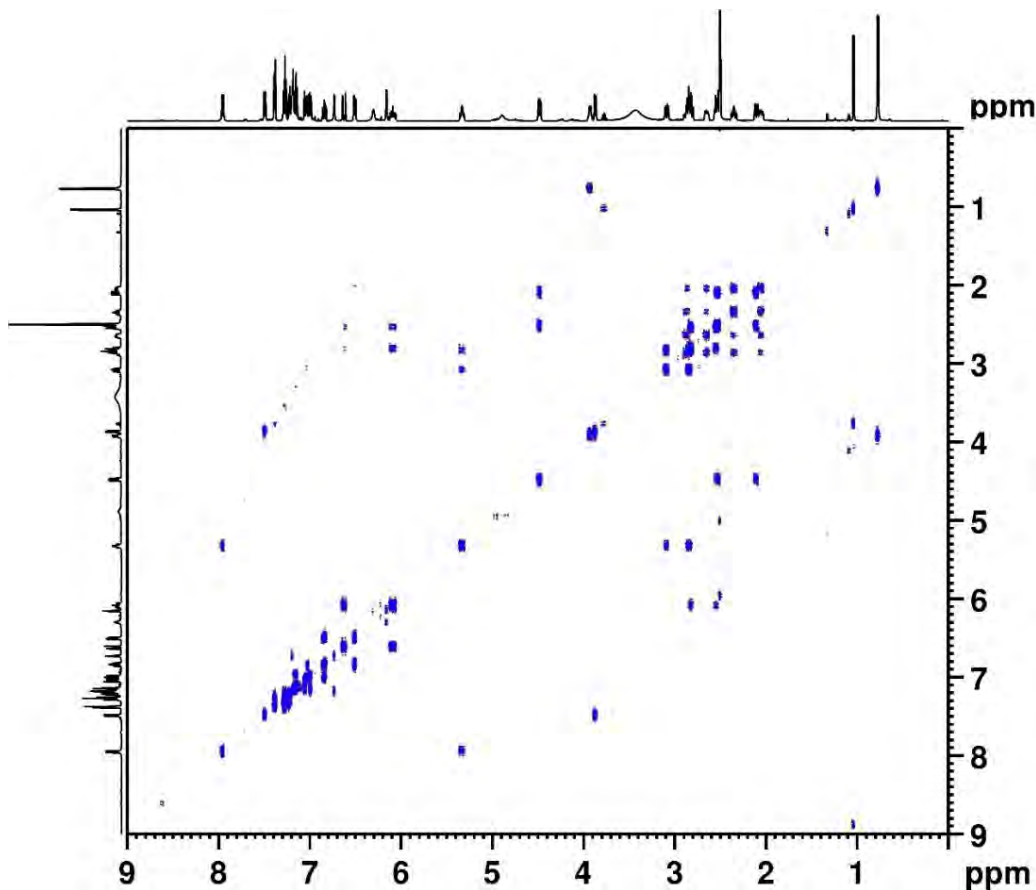

```

Current Data Parameters
NAME      W-B2-7-3
EXPNO     3
PROCNO    1

F2 - Acquisition Parameters
Date_     20121124
Time      16.44
INSTRUM   av500
PROBHD    5 mm DCH 13C-1
PULPROG   cosygpmfph
TD         4096
SOLVENT   DMSO
NS         2
DS         8
SWH        5498.534 Hz
FIDRES     1.342415 Hz
AQ         0.3724629 sec
RG         202.91
DW         90.933 usec
DE         10.00 usec
TE         298.0 K
D0         0.00007817 sec
D1         2.00000000 sec
D13        0.00000400 sec
D16        0.00020000 sec
IN0        0.00018180 sec

===== CHANNEL f1 =====
SFO1       500.1327507 MHz
NUC1       1H
P1         10.00 usec
P2         20.00 usec
PLW1       13.50000000 W

===== GRADIENT CHANNEL =====
GFNAM[1]   SMSQ10.100
GFNAM[2]   SMSQ10.100
GPZ1       10.00 %
GPZ2       20.00 %
P16        1000.00 usec

F1 - Acquisition parameters
TD         256
SFO1       500.1328 MHz
FIDRES     21.486525 Hz
SW         10.998 ppm
FnMODE     States-TPPI

F2 - Processing parameters
SI         4096
SF         500.1300048 MHz
WDW        SINE
SSB        1
    
```

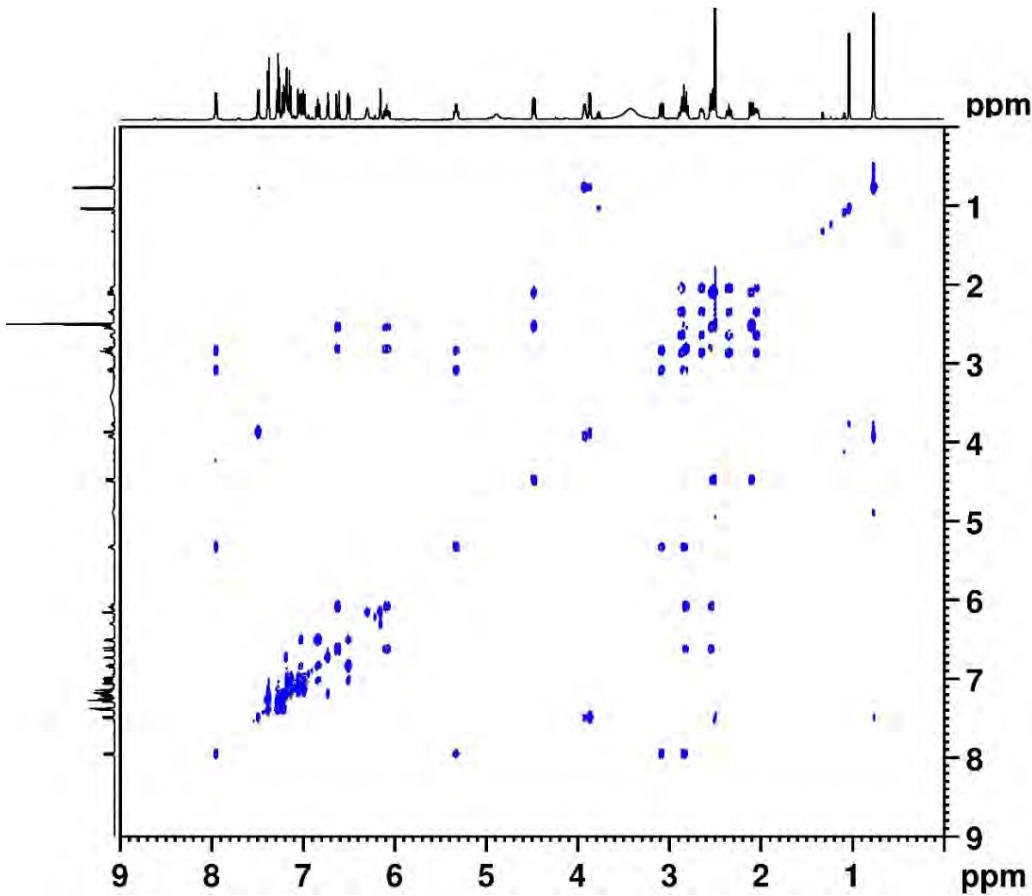

```

Current Data Parameters
NAME      W-B2-7-3
EXPNO    4
PROCNO   1

F2 - Acquisition Parameters
Date_    20121124
Time     17.05
INSTRUM  av500
PROBHD   5 mm DCH 13C-1
PULPROG  mlevetgp.js
TD       2048
SOLVENT  DMSO
NS       2
DS       8
SWH      5000.000 Hz
FIDRES   2.441406 Hz
AQ       0.2048000 sec
RG       37.94
DW       100.000 usec
DE       10.00 usec
TE       298.0 K
D0       0.00000300 sec
D1       2.00000000 sec
D9       0.06000000 sec
D11      0.03000000 sec
D12      0.00002000 sec
D16      0.00020000 sec
IN0      0.00020000 sec
L1       24

===== CHANNEL f1 =====
SFO1     500.1325007 MHz
NUC1     1H
P1       10.00 usec
P2       20.00 usec
P5       26.68 usec
P6       40.00 usec
P7       80.00 usec
P17      2500.00 usec
PLW1     13.50000000 W
PLW10    0.84375000 W

===== GRADIENT CHANNEL =====
GPNAM[1] SINE.100
GPNAM[2] SINE.100
GPZ1     30.00 %
GPZ2     30.00 %
P16      1000.00 usec

F1 - Acquisition parameters
TD       256
SFO1     500.1325 MHz
FIDRES   19.531250 Hz

```

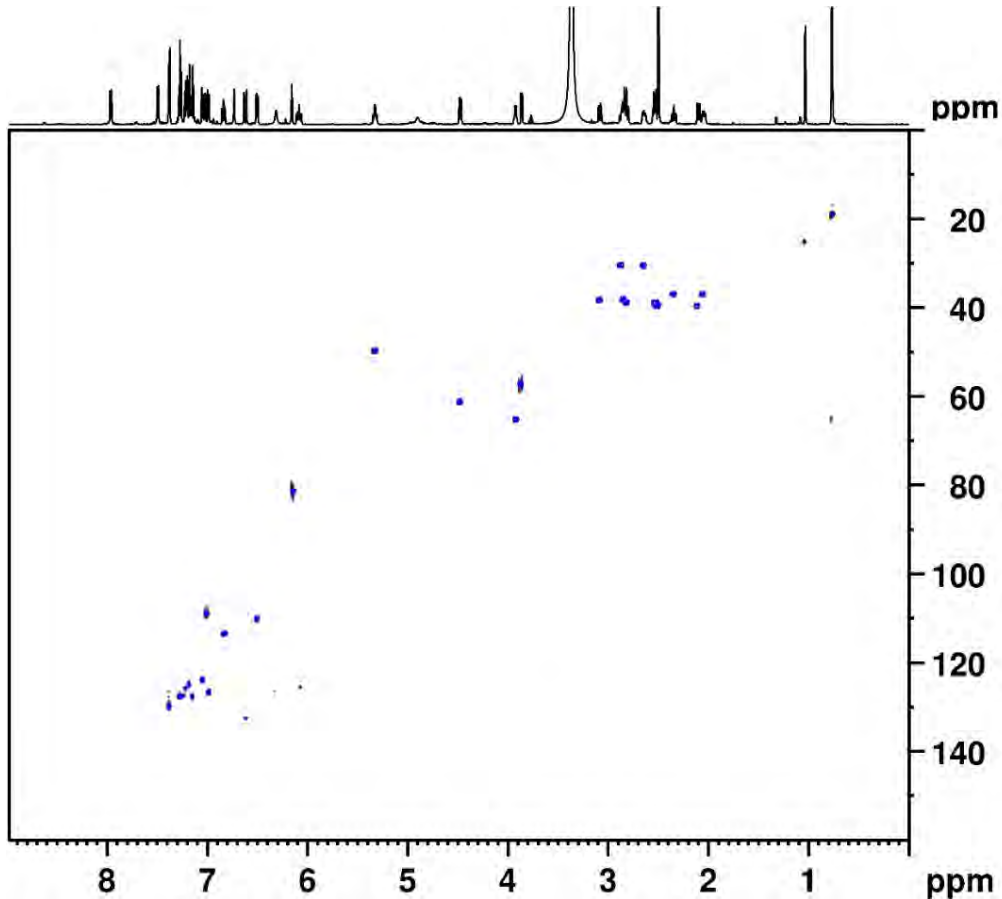

```

Current Data Parameters
NAME      W-B2-7-3_AV600
EXPNO    2
PROCNO   1

F2 - Acquisition Parameters
Date_    20121213
Time     17.27
INSTRUM  av600
PROBHD   5 mm TBI5
PULPROG  hsqcetgpsisp
TD       2048
SOLVENT  DMSO
NS       4
DS       16
SWH      5387.931 Hz
FIDRES   2.630826 Hz
AQ       0.1900544 sec
RG       26008
DW       92.800 usec
DE       6.00 usec
TE       294.9 K
CNST2    145.0000000
D0       0.00000300 sec
D1       1.20000005 sec
D4       0.00172414 sec
D11      0.03000000 sec
D16      0.00020000 sec
D24      0.00086200 sec
IN0      0.00001840 sec
ZGPTNS

===== CHANNEL f1 =====
NUC1     1H
P1       10.00 usec
P2       20.00 usec
P28      1000.00 usec
PL1      -2.00 dB
PL1W     39.81071854 W
SFO1     600.1327006 MHz

===== CHANNEL f2 =====
CPDPRG[2] gaxp
NUC2     13C
P3       18.50 usec
P4       37.00 usec
P14      1500.00 usec
PCPD2    65.00 usec
PL0      120.00 dB
PL2      -3.00 dB
PL12     7.91 dB
PLOW     0 W
PL2W     150.35617065 W
PL12W    12.19330025 W
SFO2     150.9133722 MHz

```

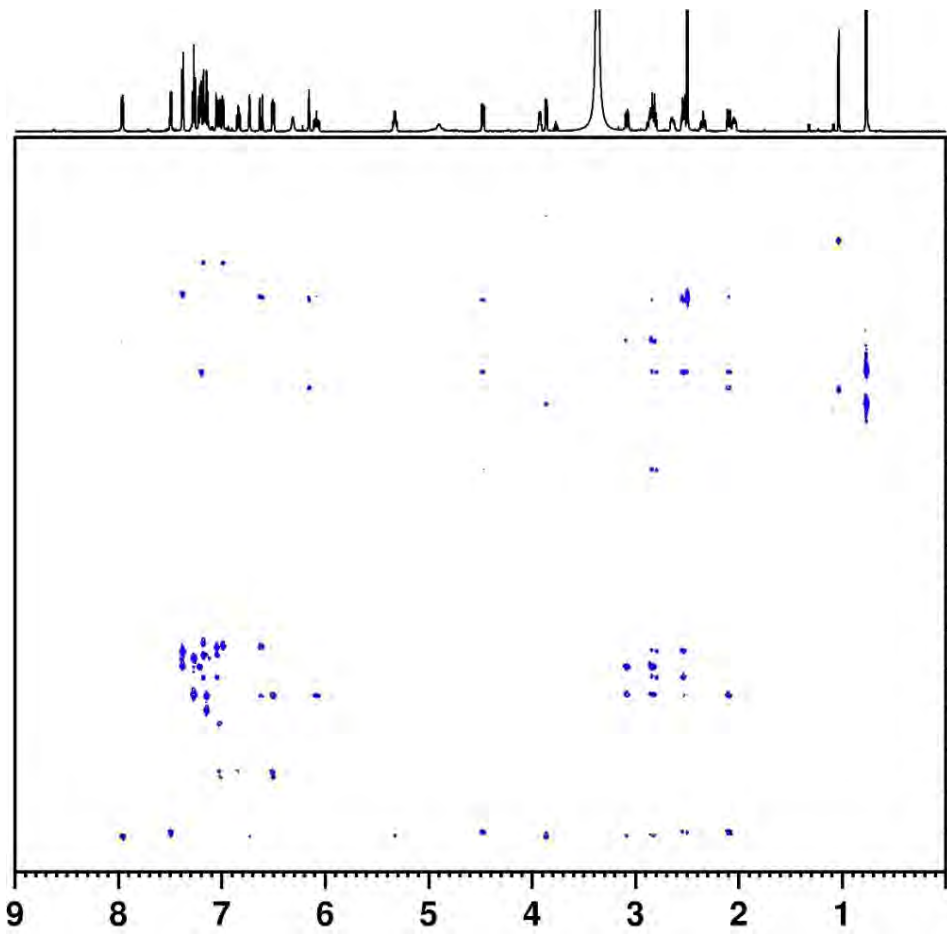

Current Data Parameters  
 NAME W-B2-7-3\_AV600  
 EXPNO 3  
 PROCNO 1

F2 - Acquisition Parameters  
 Date 20121213  
 Time 17.52  
 INSTRUM av600  
 PROBHD 5 mm TBI5  
 PULPROG hmbcgp12ndqf  
 TD 2048  
 SOLVENT DMSO  
 NS 16  
 DS 16  
 SWH 6009.615 Hz  
 FIDRES 2.934382 Hz  
 AQ 0.1703936 sec  
 RG 29193  
 DW 83.200 usec  
 DE 6.50 usec  
 TE 297.1 K  
 CNST6 120.0000000  
 CNST7 160.0000000  
 CNST13 7.0000000  
 D0 0.00000300 sec  
 D1 1.20000005 sec  
 D6 0.07142857 sec  
 D16 0.00020000 sec  
 IN0 0.00001655 sec

==== CHANNEL f1 =====  
 NUC1 1H  
 P1 10.00 usec  
 P2 20.00 usec  
 PL1 -2.00 dB  
 PL1W 39.81071854 W  
 SFO1 600.1330006 MHz  
 ===== CHANNEL f2 =====  
 NUC2 13C  
 P3 18.50 usec  
 PL2 -3.00 dB  
 PL2W 150.35617065 W  
 SFO2 150.9163903 MHz

===== GRADIENT CHANNEL =====  
 GPNAM[1] SINE.100  
 GPNAM[2] SINE.100  
 GPNAM[3] SINE.100  
 GPNAM[4] SINE.100  
 GPNAM[5] SINE.100  
 GPNAM[6] SINE.100  
 GPX1 0 %  
 GPX2 0 %

Acyclic Precursor 10

Current Data Parameters  
 NAME ICON\_W-A4  
 EXPNO 1  
 PROCNO 1

F2 - Acquisition Parameters  
 Date\_ 20121013  
 Time 12.32  
 INSTRUM av500  
 PROBHD 5 mm DCH 13C-1  
 PULPROG zg30  
 TD 65536  
 SOLVENT DMSO  
 NS 8  
 DS 0  
 SWH 10000.000 Hz  
 FIDRES 0.152588 Hz  
 AQ 3.2767999 sec  
 RG 20.17  
 DW 50.000 usec  
 DE 10.00 usec  
 TE 298.0 K  
 DL 2.00000000 sec  
 TDO 1

===== CHANNEL f1 =====  
 NUC1 1H  
 P1 10.00 usec  
 PLW1 13.5000000 W  
 SFO1 500.1330008 MHz

F2 - Processing parameters  
 SI 65536  
 SF 500.1300000 MHz  
 WDW EM  
 SSB 0  
 LB 0.30 Hz  
 GB 0  
 PC 1.00

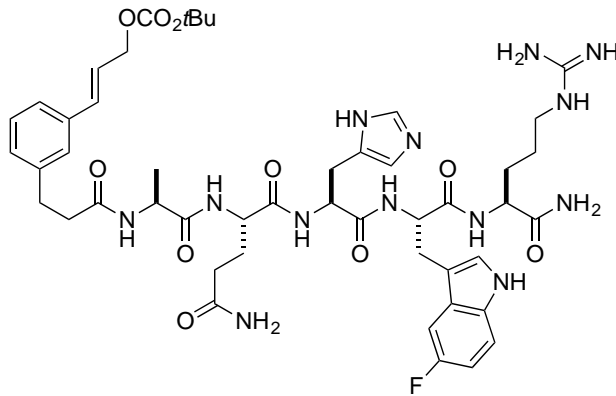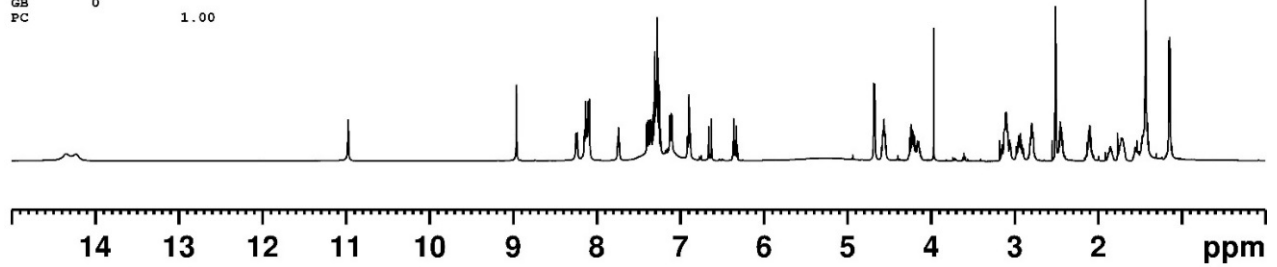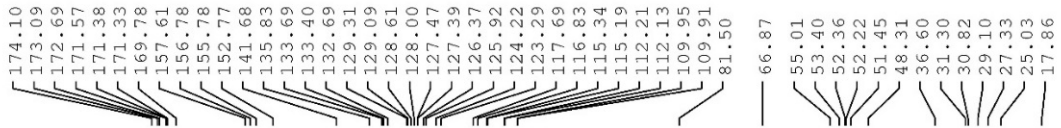

Current Data Parameters  
 NAME ICON\_W-A4  
 EXPNO 2  
 PROCNO 1

F2 - Processing parameters  
 SI 131072  
 SF 125.7578519 MHz  
 WDW EM  
 SSB 0  
 LB 1.00 Hz  
 GB 0  
 PC 1.40

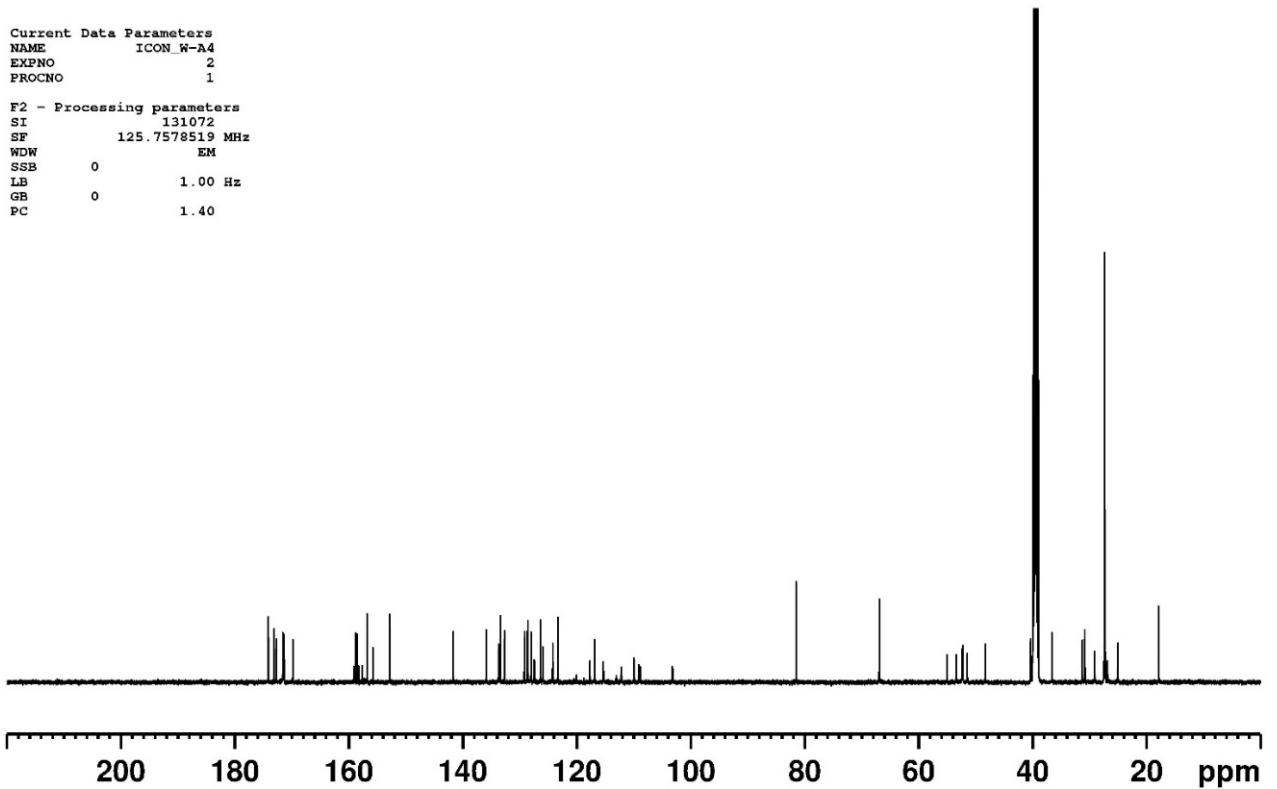

Macrocyclic Product 11a

```

Current Data Parameters
NAME      W-A4-5-1
EXPNO    2
PROCNO    1

F2 - Acquisition Parameters
Date_    20121027
Time     17.23
INSTRUM  av500
PROBHD   5 mm DCH 13C-1
PULPROG  zg
TD        65536
SOLVENT  DMSO
NS        8
DS        0
SWH       10000.000 Hz
FIDRES    0.152588 Hz
AQ        3.2767999 sec
RG         7
DW         50.000 usec
DE         10.00 usec
TE         298.0 K
D1         2.00000000 sec
TD0        1
    
```

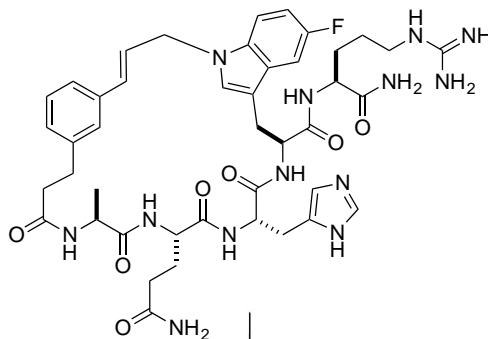

```

===== CHANNEL f1 =====
NUC1      1H
P1        10.00 usec
PLW1      13.50000000 W
SFO1      500.1330008 MHz
    
```

```

F2 - Processing parameters
SI         65536
SF         500.1300039 MHz
WDW        EM
SSB        0
LB         0.30 Hz
GB         0
PC         1.00
    
```

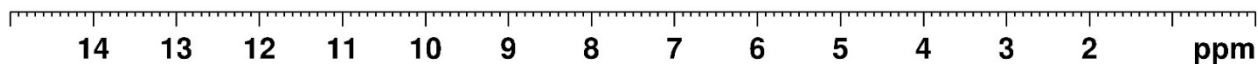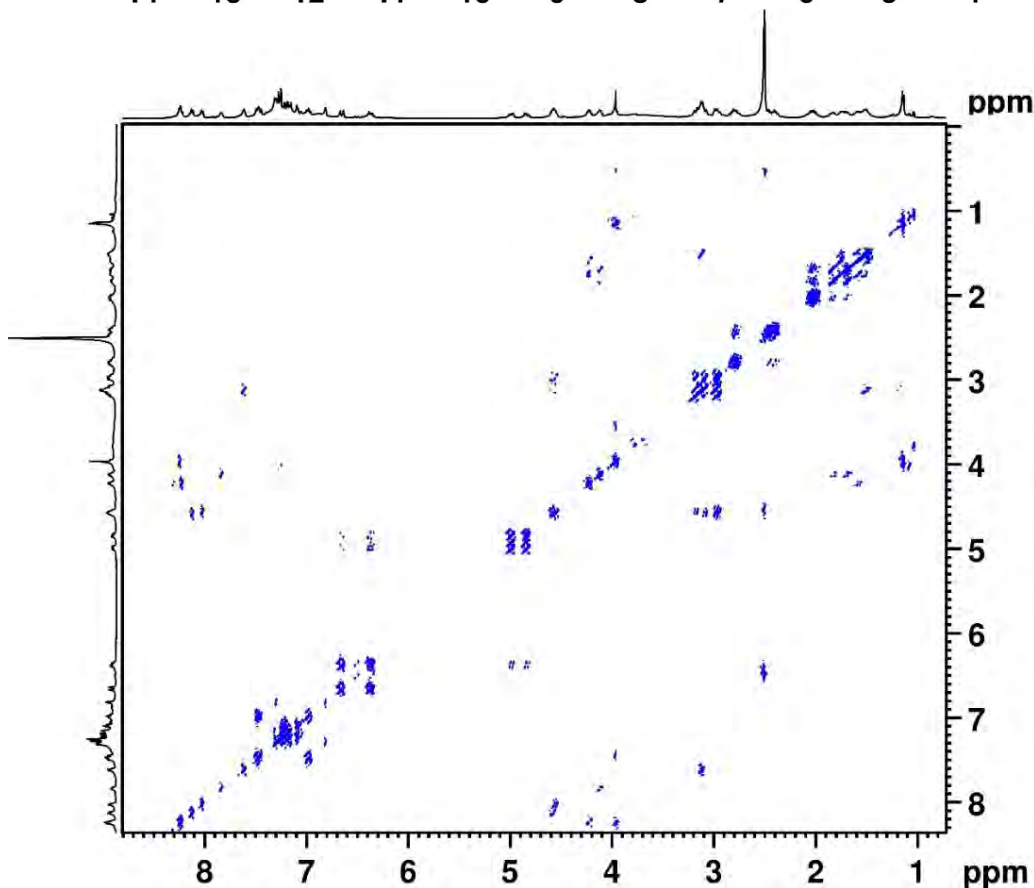

```

Current Data Parameters
NAME      W-A4-5-1
EXPNO    3
PROCNO    1
    
```

```

F2 - Acquisition Parameters
Date_    20121027
Time     17.24
INSTRUM  av500
PROBHD   5 mm DCH 13C-1
PULPROG  cosygpmph
TD        4096
SOLVENT  DMSO
NS        8
DS        2
SWH       5498.534 Hz
FIDRES    1.342415 Hz
AQ        0.3724629 sec
RG        202.91
DW         90.933 usec
DE         10.00 usec
TE         298.0 K
D0         0.00008724 sec
D1         2.00000000 sec
D13        0.00000400 sec
D16        0.00020000 sec
IN0        0.00019995 sec
    
```

```

===== CHANNEL f1 =====
NUC1      1H
P1        10.00 usec
P2        20.00 usec
PLW1      13.50000000 W
SFO1      500.1327507 MHz
    
```

```

===== GRADIENT CHANNEL =====
GPNAM[1]  SMSQ10.100
GPNAM[2]  SMSQ10.100
GPZ1      10.00 %
GPZ2      20.00 %
P16       1000.00 usec
    
```

```

F1 - Acquisition parameters
TD         256
SFO1       500.1328 MHz
FIDRES     19.536423 Hz
SW         10.000 ppm
FnMODE     States-TPPI
    
```

```

F2 - Processing parameters
SI         4096
SF         500.1300044 MHz
WDW        SINE
SSB        1
    
```

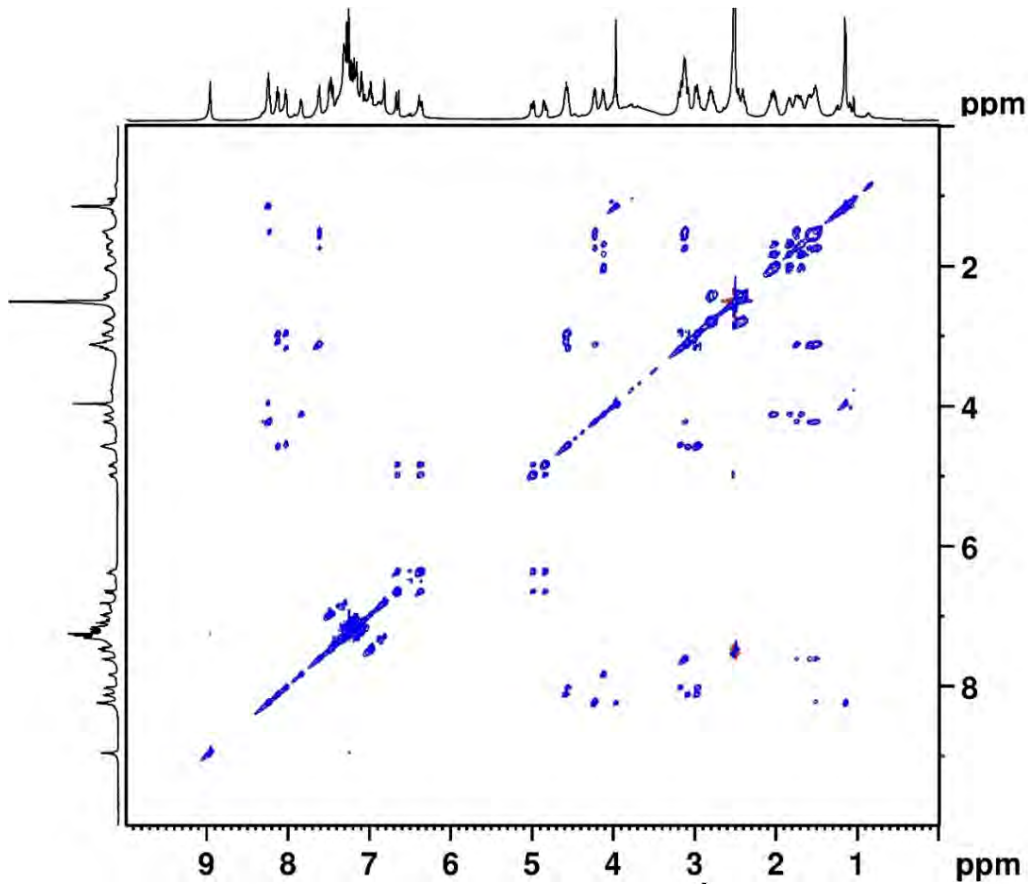

```

Current Data Parameters
NAME      W-A4-5-1
EXPNO    4
PROCNO   1

F2 - Acquisition Parameters
Date_    20121027
Time     17.45
INSTRUM  av500
PROBHD   5 mm DCH 13C-1
PULPROG  mlevetgp.js
TD       2048
SOLVENT  DMSO
NS       2
DS       8
SWH      5000.000 Hz
FIDRES   2.441406 Hz
AQ       0.2048000 sec
RG       37.94
DW       100.000 usec
DE       10.00 usec
TE       298.0 K
D0       0.00000300 sec
D1       2.00000000 sec
D9       0.06000000 sec
D11      0.03000000 sec
D12      0.00002000 sec
D16      0.00020000 sec
IN0      0.00019995 sec
L1       24

===== CHANNEL f1 =====
NUC1     1H
P1       10.00 usec
P2       20.00 usec
P5       26.68 usec
P6       40.00 usec
P7       80.00 usec
P17      2500.00 usec
PLW1     13.50000000 W
PLW10    0.84375000 W
SFO1     500.1325007 MHz

===== GRADIENT CHANNEL =====
GPNAM[1] SINE.100
GPNAM[2] SINE.100
GPZ1     30.00 %
GPZ2     30.00 %
P16      1000.00 usec

F1 - Acquisition parameters
TD       256
SFO1     500.1325 MHz
FIDRES   19.536406 Hz

```

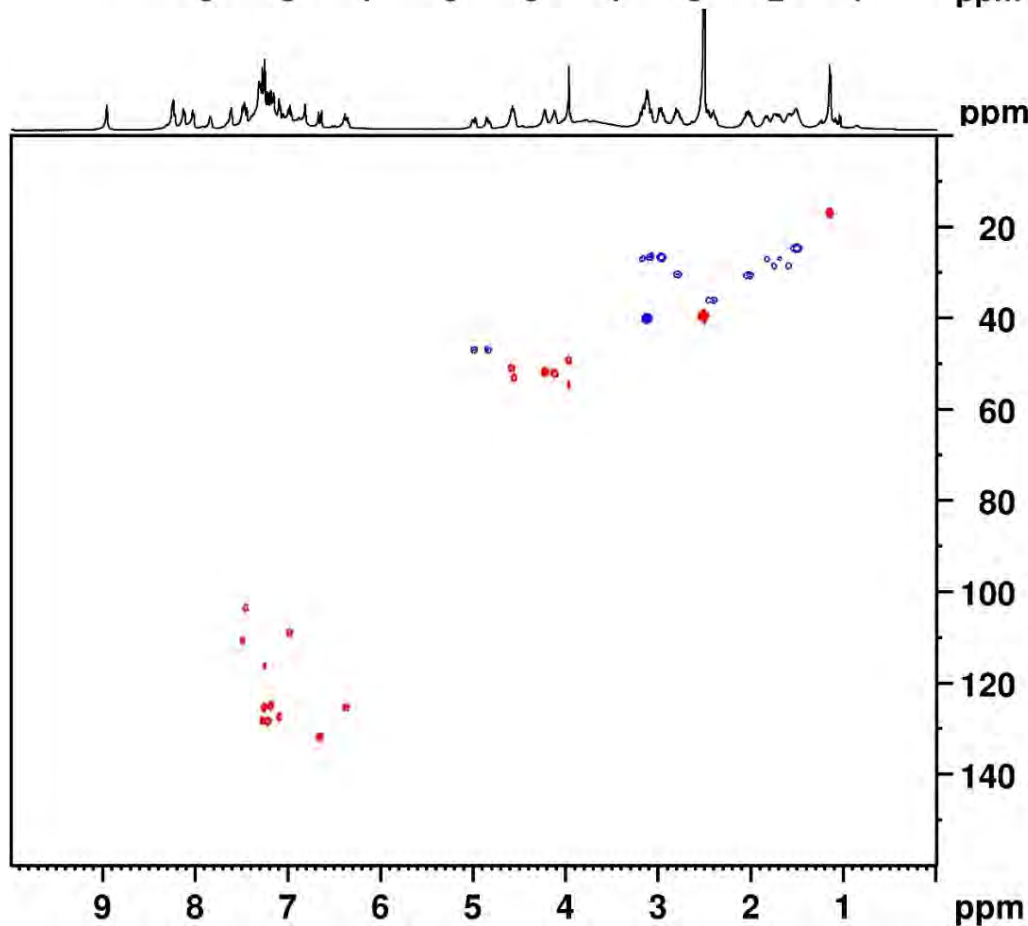

```

Current Data Parameters
NAME      W-A4-5-1
EXPNO    5
PROCNO   1

F2 - Acquisition Parameters
Date_    20121027
Time     18.06
INSTRUM  av500
PROBHD   5 mm DCH 13C-1
PULPROG  hsqcedetgp
TD       2048
SOLVENT  DMSO
NS       4
DS       16
SWH      5000.000 Hz
FIDRES   2.441406 Hz
AQ       0.2048000 sec
RG       202.91
DW       100.000 usec
DE       10.00 usec
TE       298.0 K
CNST2    145.0000000
D0       0.00000300 sec
D1       1.50000000 sec
D4       0.00172414 sec
D11      0.03000000 sec
D13      0.00000400 sec
D16      0.00020000 sec
D21      0.00345000 sec
IN0      0.00001990 sec
ZGOPTNS

===== CHANNEL f1 =====
NUC1     1H
P1       10.00 usec
P2       20.00 usec
P28      0 usec
PLW1     13.50000000 W
SFO1     500.1325007 MHz

===== CHANNEL f2 =====
CPDPRG[2] garp
NUC2     13C
P3       9.63 usec
P4       19.26 usec
PCPD2    70.00 usec
PLW2     23.01399994 W
PLW12    0.43557000 W
SFO2     125.7678496 MHz

===== GRADIENT CHANNEL =====
GPNAM[1] SMSQ10.100
GPNAM[2] SMSQ10.100
GPZ1     80.00 %

```

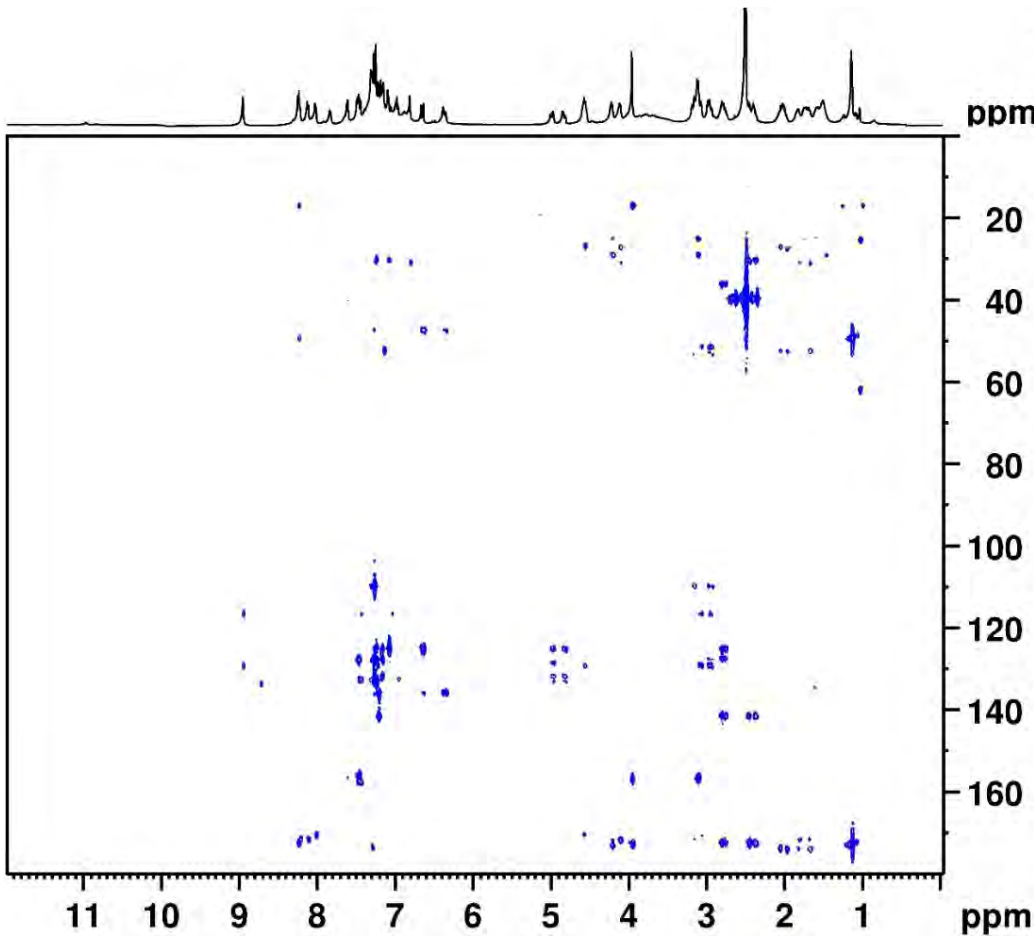

Current Data Parameters  
 NAME W-A4-5-1  
 EXPNO 6  
 PROCNO 1

F2 - Acquisition Parameters  
 Date 20121027  
 Time 18.36  
 INSTRUM av500  
 PROBHD 5 mm DCH 13C-1  
 PULPROG hmbcgp12ndqf  
 TD 2048  
 SOLVENT DMSO  
 NS 10  
 DS 16  
 SWH 6009.615 Hz  
 FIDRES 2.934382 Hz  
 AQ 0.1703936 sec  
 RG 202.91  
 DW 83.200 usec  
 DE 10.00 usec  
 TE 298.0 K  
 CNST6 120.0000000  
 CNST7 160.0000000  
 CNST13 7.0000000  
 D0 0.00000300 sec  
 D1 1.50000000 sec  
 D6 0.07142857 sec  
 D16 0.00020000 sec  
 IN0 0.00001990 sec

==== CHANNEL f1 =====  
 NUC1 1H  
 P1 10.00 usec  
 P2 20.00 usec  
 PLW1 13.50000000 W  
 SFO1 500.1330008 MHz

==== CHANNEL f2 =====  
 NUC2 13C  
 P3 9.63 usec  
 PLW2 23.01399994 W  
 SFO2 125.7703648 MHz

==== GRADIENT CHANNEL =====  
 GPNAM[1] SMSQ10.100  
 GPNAM[2] SMSQ10.100  
 GPNAM[3] SMSQ10.100  
 GPNAM[4] SMSQ10.100  
 GPNAM[5] SMSQ10.100  
 GPNAM[6] SMSQ10.100  
 GPZ1 50.00 %  
 GPZ2 30.00 %  
 GPZ3 40.10 %  
 GPZ4 15.00 %

Macroyclic Product 11b

```

Current Data Parameters
NAME      W-A4-2
EXPNO    1
PROCNO   1

F2 - Acquisition Parameters
Date_    20121020
Time     15.16
INSTRUM av500
PROBHD   5 mm DCH 13C-1
PULPROG  zg30
TD       65536
SOLVENT  DMSO
NS       8
DS       0
SWH      10000.000 Hz
FIDRES   0.152588 Hz
AQ       3.2767999 sec
RG       22.82
DW       50.0000 usec
DE       10.00 usec
TE       298.0 K
D1       2.00000000 sec
TD0      1
    
```

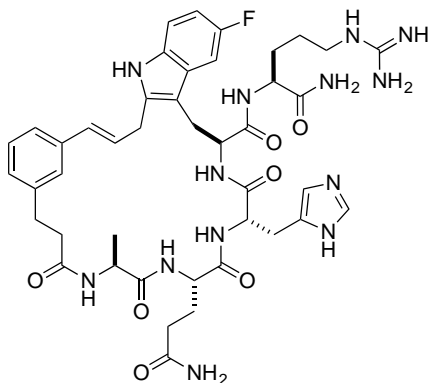

```

===== CHANNEL f1 =====
NUC1     1H
P1       10.00 usec
PLW1     13.50000000 W
SFO1     500.1330008 MHz
    
```

```

F2 - Processing parameters
SI       65536
SF       500.1300146 MHz
WDW      EM
SSB      0
LB       0.30 Hz
GB       0
PC       1.00
    
```

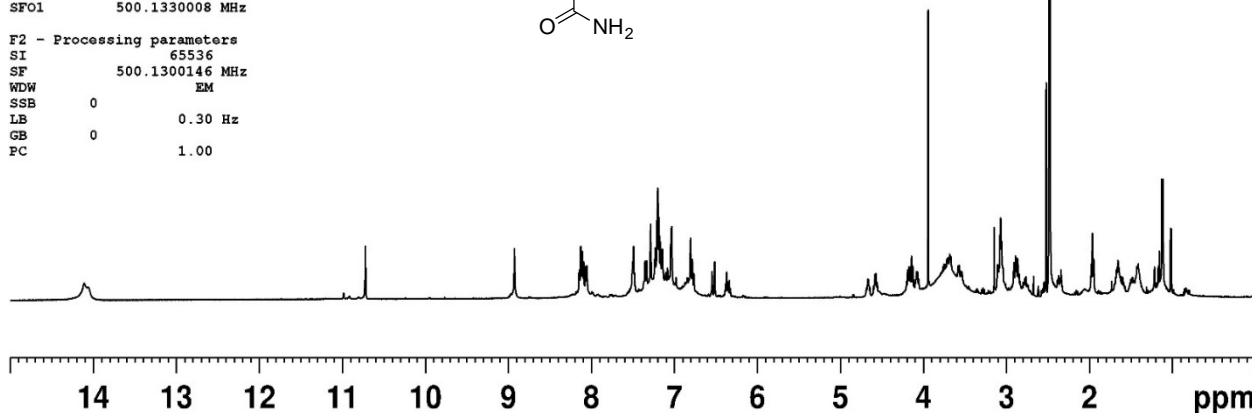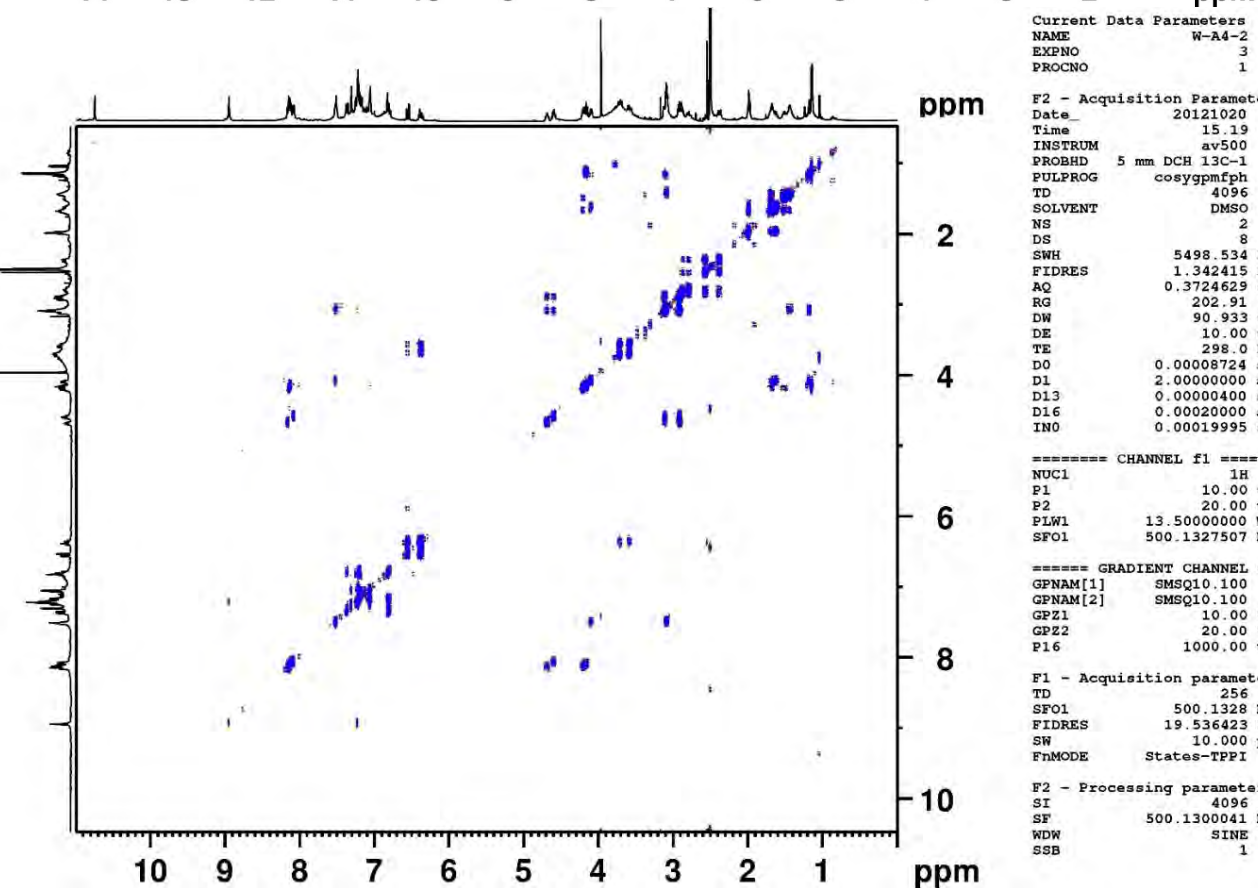

```

Current Data Parameters
NAME      W-A4-2
EXPNO    3
PROCNO   1
    
```

```

F2 - Acquisition Parameters
Date_    20121020
Time     15.19
INSTRUM av500
PROBHD   5 mm DCH 13C-1
PULPROG  cosygpmfph
TD       4096
SOLVENT  DMSO
NS       2
DS       8
SWH      5498.534 Hz
FIDRES   1.342415 Hz
AQ       0.3724629 sec
RG       202.91
DW       90.933 usec
DE       10.00 usec
TE       298.0 K
D0       0.00008724 sec
D1       2.00000000 sec
D13      0.00000400 sec
D16      0.00020000 sec
IN0      0.00019995 sec
    
```

```

===== CHANNEL f1 =====
NUC1     1H
P1       10.00 usec
P2       20.00 usec
PLW1     13.50000000 W
SFO1     500.1327507 MHz
    
```

```

===== GRADIENT CHANNEL =====
GFNAM[1] SMSq10.100
GFNAM[2] SMSq10.100
GPZ1     10.00 %
GPZ2     20.00 %
P16      1000.00 usec
    
```

```

F1 - Acquisition parameters
TD       256
SFO1     500.1328 MHz
FIDRES   19.536423 Hz
SW       10.000 ppm
FnMODE   States-TPPI
    
```

```

F2 - Processing parameters
SI       4096
SF       500.1300041 MHz
WDW      SINE
SSB      1
    
```



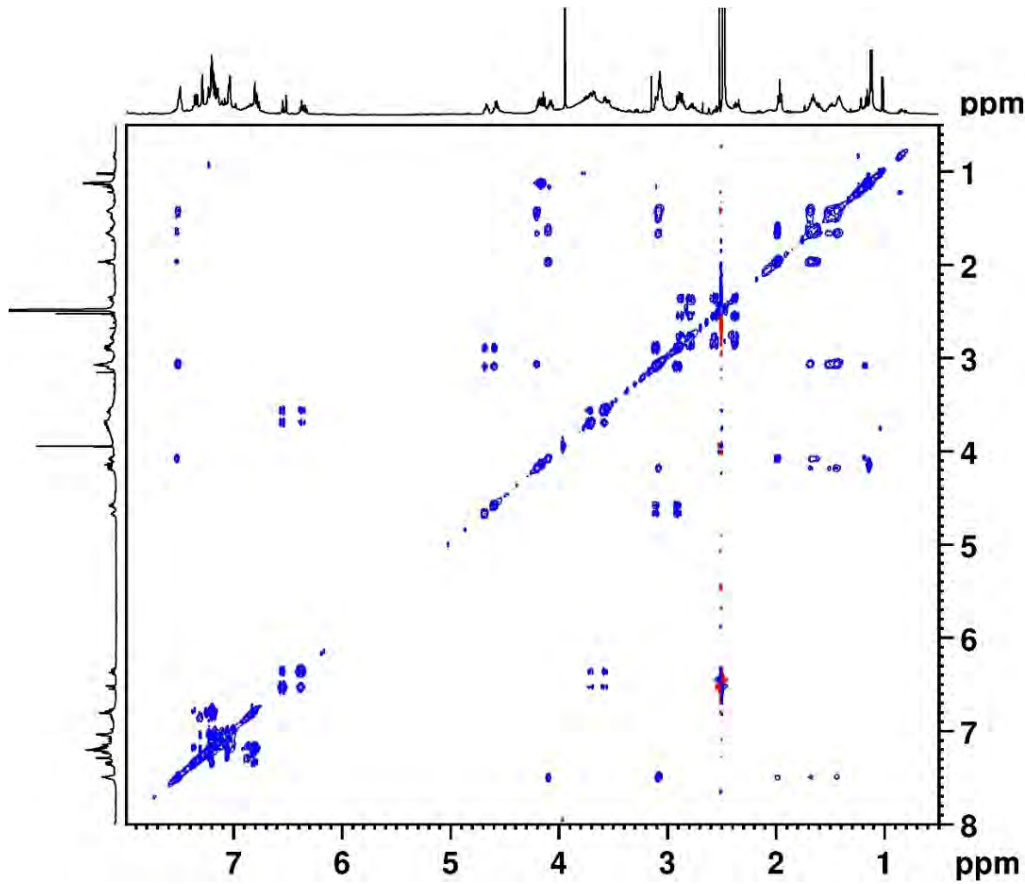

```

Current Data Parameters
NAME      W-A4-2
EXPNO    4
PROCNO   1

F2 - Acquisition Parameters
Date_    20121020
Time     15.40
INSTRUM  av500
PROBHD   5 mm DCH 13C-1
PULPROG  mlevetgp.js
TD       2048
SOLVENT  DMSO
NS       2
DS       8
SWH      4000.000 Hz
FIDRES   1.953125 Hz
AQ       0.2560000 sec
RG       37.94
DW       125.000 usec
DE       10.00 usec
TE       298.0 K
D0       0.00000300 sec
D1       2.00000000 sec
D9       0.06000000 sec
D11      0.03000000 sec
D12      0.00002000 sec
D16      0.00020000 sec
IN0      0.00024995 sec
L1       24

===== CHANNEL f1 =====
NUC1     1H
P1       10.00 usec
P2       20.00 usec
P5       26.68 usec
P6       40.00 usec
P7       80.00 usec
P17      2500.00 usec
PLW1     13.50000000 W
PLW10    0.84375000 W
SFO1     500.1320005 MHz

===== GRADIENT CHANNEL =====
GPNAM[1] SINE.100
GPNAM[2] SINE.100
GPZ1     30.00 %
GPZ2     30.00 %
P16      1000.00 usec

F1 - Acquisition parameters
TD       256
SFO1     500.132 MHz
FIDRES   15.629138 Hz

```

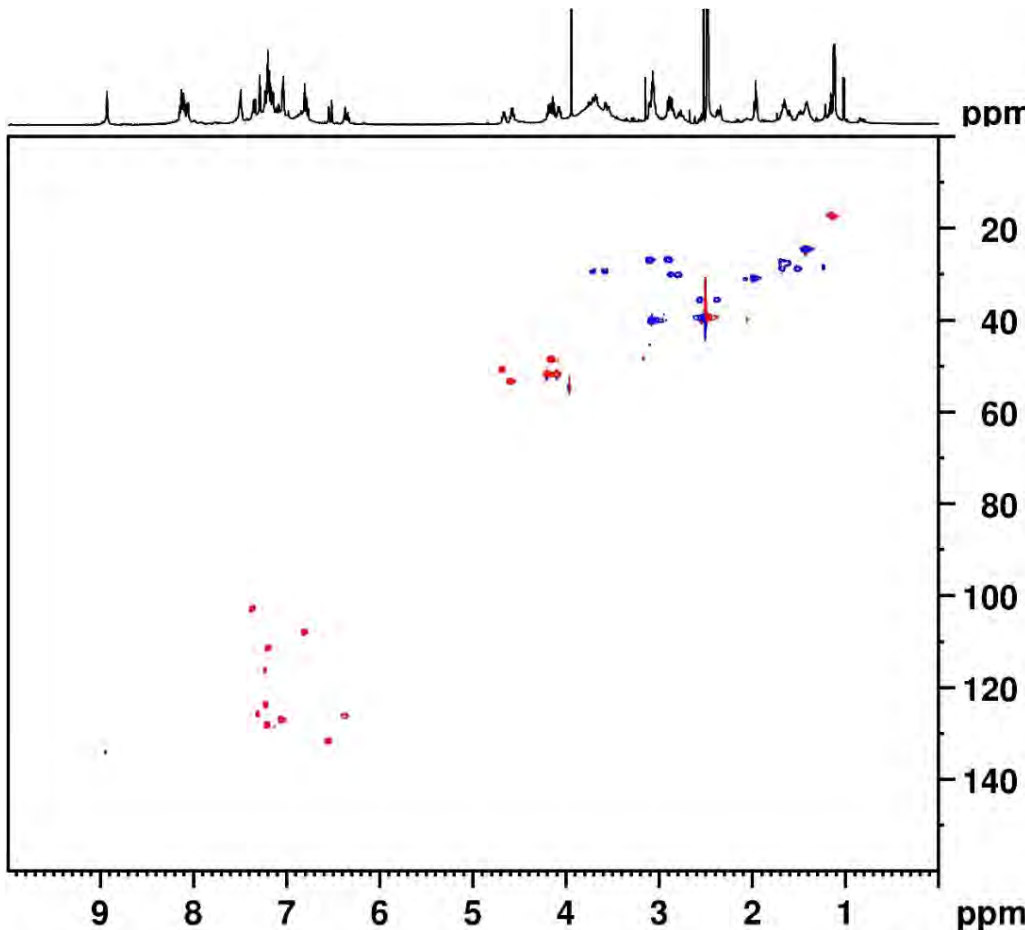

```

Current Data Parameters
NAME      W-A4-2
EXPNO    6
PROCNO   1

F2 - Acquisition Parameters
Date_    20121022
Time     17.40
INSTRUM  av500
PROBHD   5 mm DCH 13C-1
PULPROG  hsqcedetgp
TD       2048
SOLVENT  DMSO
NS       4
DS       16
SWH      5000.000 Hz
FIDRES   2.441406 Hz
AQ       0.2048000 sec
RG       202.91
DW       100.000 usec
DE       10.00 usec
TE       298.0 K
CNST2    145.0000000
D0       0.00000300 sec
D1       1.50000000 sec
D4       0.00172414 sec
D11      0.03000000 sec
D13      0.00000400 sec
D16      0.00020000 sec
D21      0.00345000 sec
IN0      0.00001990 sec
ZGOPTNS

===== CHANNEL f1 =====
NUC1     1H
P1       10.00 usec
P2       20.00 usec
P28      0 usec
PLW1     13.50000000 W
SFO1     500.1325007 MHz

===== CHANNEL f2 =====
CPDPRG[2] garp
NUC2     13C
P3       9.63 usec
P4       19.26 usec
PCPD2    70.00 usec
PLW2     23.01399994 W
PLW12    0.43557000 W
SFO2     125.7678496 MHz

===== GRADIENT CHANNEL =====
GPNAM[1] SMSQ10.100
GPNAM[2] SMSQ10.100
GPZ1     80.00 %

```

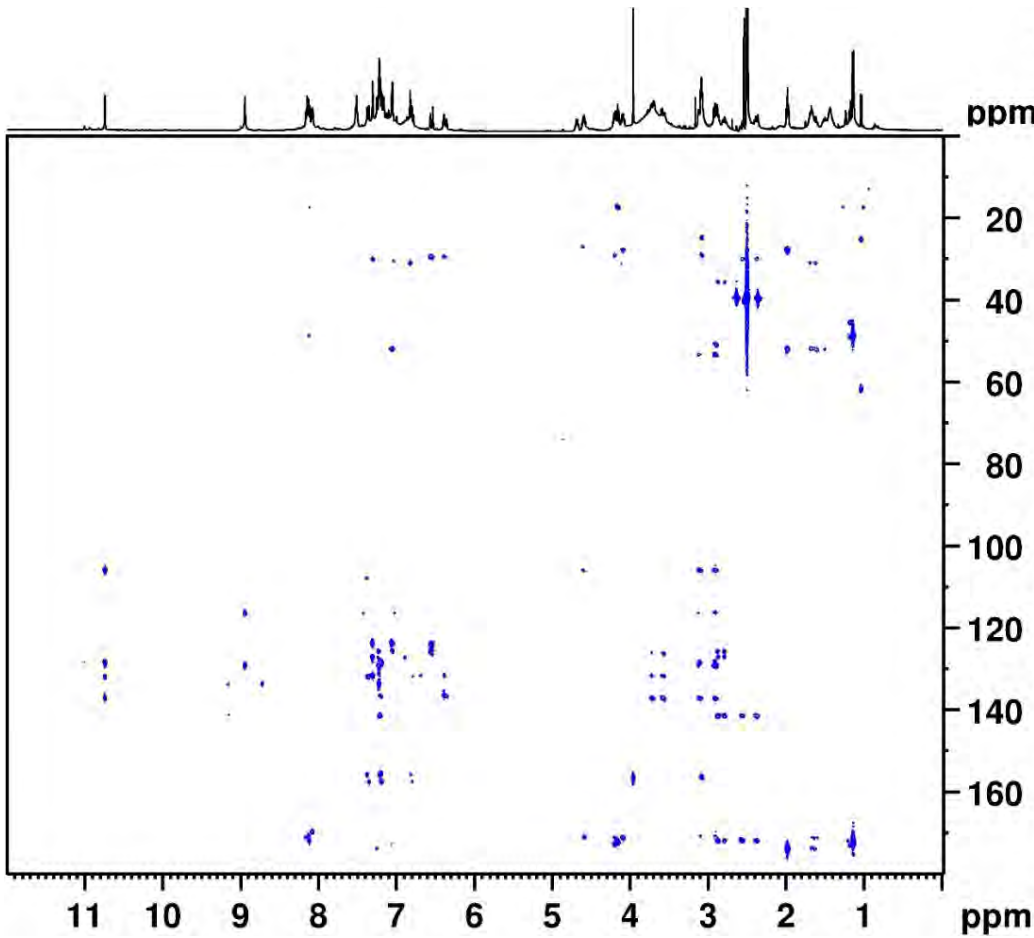

```

Current Data Parameters
NAME           W-A4-2
EXPNO         7
PROCNO        1

F2 - Acquisition Parameters
Date_         20121022
Time          18.10
INSTRUM       av500
PROBHD        5 mm DCH 13C-1
PULPROG       hmbcgp12ndqf
TD            2048
SOLVENT       DMSO
NS            6
DS            16
SWH           6009.615 Hz
FIDRES        2.934382 Hz
AQ            0.1703936 sec
RG            202.91
DW            83.200 usec
DE            10.00 usec
TE            298.0 K
CNST6         120.0000000
CNST7         160.0000000
CNST13        7.0000000
D0            0.00000300 sec
D1            1.50000000 sec
D6            0.07142857 sec
D16           0.00020000 sec
IN0           0.00001990 sec

===== CHANNEL f1 =====
NUC1           1H
P1             10.00 usec
P2             20.00 usec
PLW1          13.50000000 W
SFO1          500.1330008 MHz

===== CHANNEL f2 =====
NUC2           13C
P3             9.63 usec
PLW2          23.01399994 W
SFO2          125.7703648 MHz

===== GRADIENT CHANNEL =====
GPNAM[1]       SMSQ10.100
GPNAM[2]       SMSQ10.100
GPNAM[3]       SMSQ10.100
GPNAM[4]       SMSQ10.100
GPNAM[5]       SMSQ10.100
GPNAM[6]       SMSQ10.100
GPZ1           50.00 %
GPZ2           30.00 %
GPZ3           40.10 %
GPZ4           15.00 %

```

Macroyclic Product 11c

Current Data Parameters  
 NAME W-A4-3-1 (09-2013)  
 EXPNO 6  
 PROCNO 1

F2 - Acquisition Parameters  
 Date\_ 20130929  
 Time 8.38  
 INSTRUM av600  
 PROBHD 5 mm TBI5  
 PULPROG zgpr  
 TD 65536  
 SOLVENT DMSO  
 NS 128  
 DS 0  
 SWH 12376.237 Hz  
 FIDRES 0.188846 Hz  
 AQ 2.6476543 sec  
 RG 181  
 DW 40.400 usec  
 DE 6.50 usec  
 TE 298.0 K  
 D1 2.0000000 sec  
 D12 0.00002000 sec  
 TD0 1

===== CHANNEL f1 =====  
 NUC1 1H  
 P1 10.20 usec  
 PL1 -2.00 dB  
 PL9 51.15 dB  
 PL1W 39.81071854 W  
 PL9W 0.00019275 W  
 SFO1 600.1319858 MHz

F2 - Processing parameters  
 SI 65536  
 SF 600.1300058 MHz  
 WDW EM  
 SSB 0  
 LB 0.30 Hz  
 GB 0  
 FC 1.00

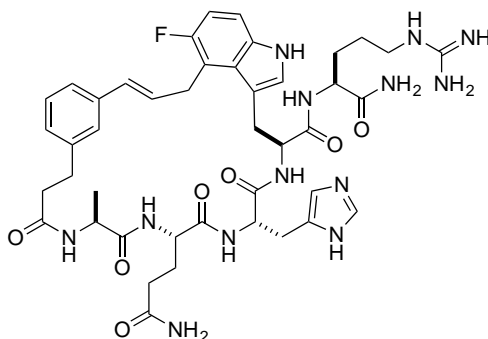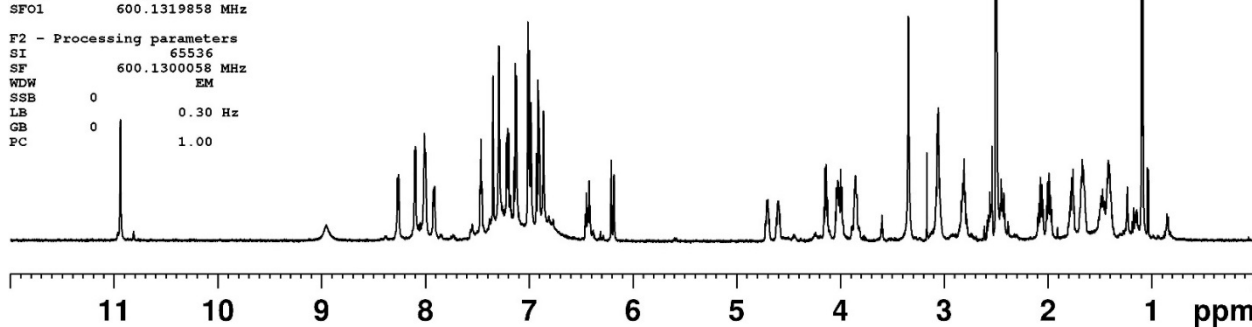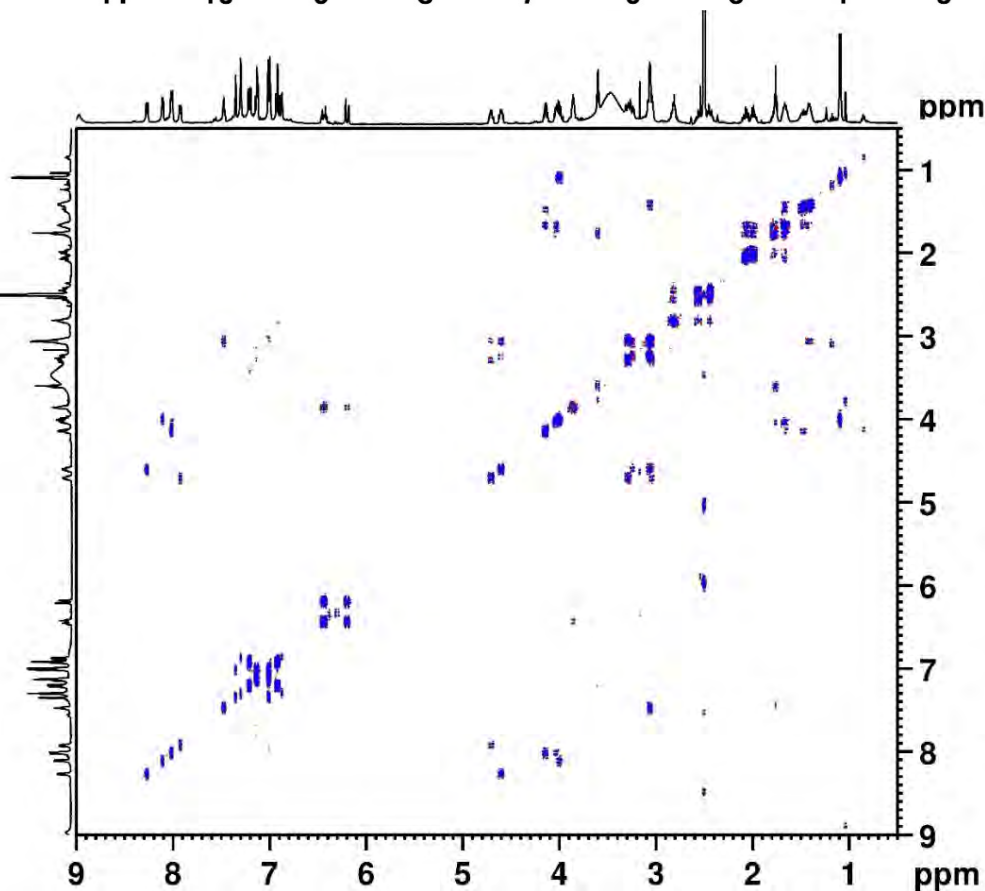

Current Data Parameters  
 NAME W-A4-3-1  
 EXPNO 3  
 PROCNO 1

F2 - Acquisition Parameters  
 Date\_ 20121110  
 Time 12.10  
 INSTRUM av500  
 PROBHD 5 mm DCH 13C-1  
 PULPROG cosygpmfph  
 TD 4096  
 SOLVENT DMSO  
 NS 2  
 DS 8  
 SWH 5498.534 Hz  
 FIDRES 1.342415 Hz  
 AQ 0.3724629 sec  
 RG 202.91  
 DW 90.933 usec  
 DE 10.00 usec  
 TE 298.0 K  
 D0 0.00007815 sec  
 D1 2.0000000 sec  
 D13 0.00000400 sec  
 D16 0.00020000 sec  
 IN0 0.00018175 sec

===== CHANNEL f1 =====  
 NUC1 1H  
 P1 10.00 usec  
 P2 20.00 usec  
 PLW1 13.5000000 W  
 SFO1 500.1327507 MHz

===== GRADIENT CHANNEL =====  
 GPNAM[1] SMSQ10.100  
 GPNAM[2] SMSQ10.100  
 GPZ1 10.00 %  
 GPZ2 20.00 %  
 P16 1000.00 usec

F1 - Acquisition parameters  
 TD 256  
 SFO1 500.1328 MHz  
 FIDRES 21.490080 Hz  
 SW 11.000 ppm  
 FMODE States-TPPI

F2 - Processing parameters  
 SI 4096  
 SF 500.1300056 MHz  
 WDW SINE  
 SSB 1

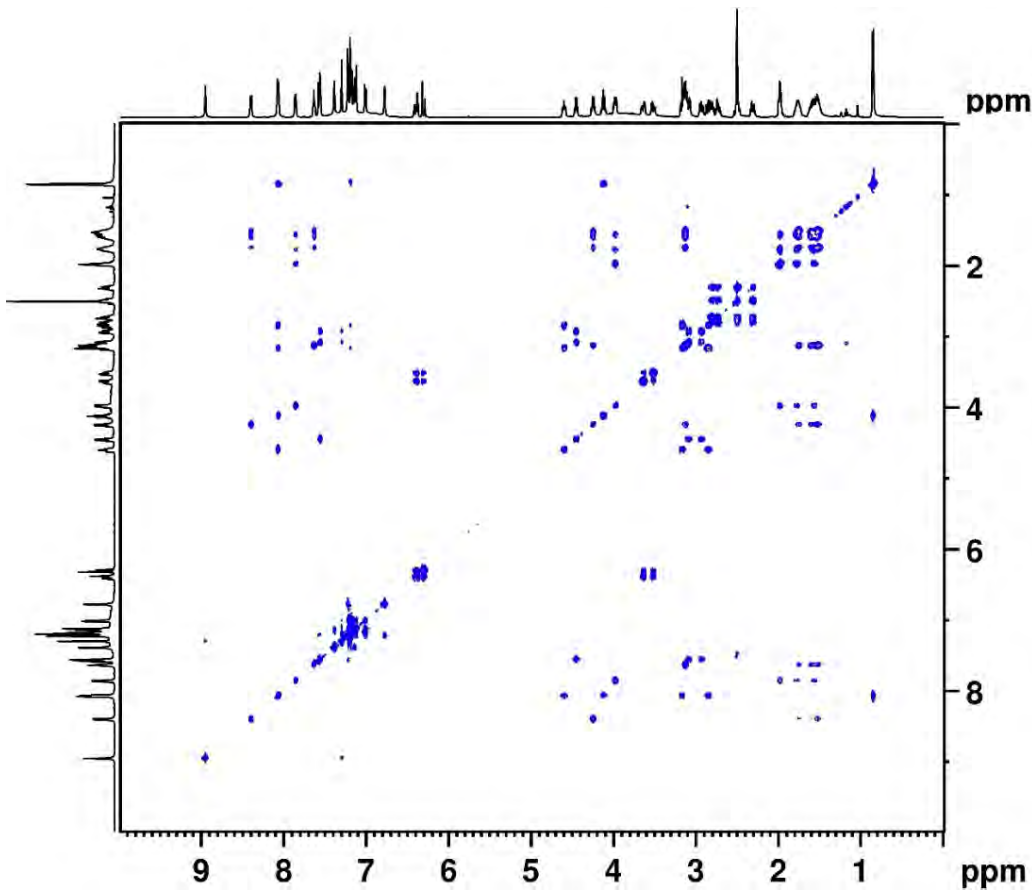

```

Current Data Parameters
NAME      W-A4-4-17(2)
EXPNO    4
PROCNO   1

F2 - Acquisition Parameters
Date_    20121023
Time     19.13
INSTRUM  av500
PROBHD   5 mm DCH 13C-1
PULPROG  mleveltp.js
TD       2048
SOLVENT  DMSO
NS       2
DS       8
SWH      5000.000 Hz
FIDRES   2.441406 Hz
AQ       0.2048000 sec
RG       37.94
DW       100.000 usec
DE       10.00 usec
TE       298.0 K
D0       0.00000300 sec
D1       2.00000000 sec
D9       0.06000000 sec
D11      0.03000000 sec
D12      0.00002000 sec
D16      0.00020000 sec
IN0      0.00019995 sec
LI       24

===== CHANNEL f1 =====
NUC1     1H
P1       10.00 usec
P2       20.00 usec
P5       26.68 usec
P6       40.00 usec
P7       80.00 usec
P17      2500.00 usec
PLW1    13.50000000 W
PLW10   0.84375000 W
SFO1    500.1325007 MHz

===== GRADIENT CHANNEL =====
GPNAM[1] SINE.100
GPNAM[2] SINE.100
GPZ1     30.00 %
GPZ2     30.00 %
P16      1000.00 usec

F1 - Acquisition parameters
TD       256
SFO1    500.1325 MHz
FIDRES   19.536406 Hz

```

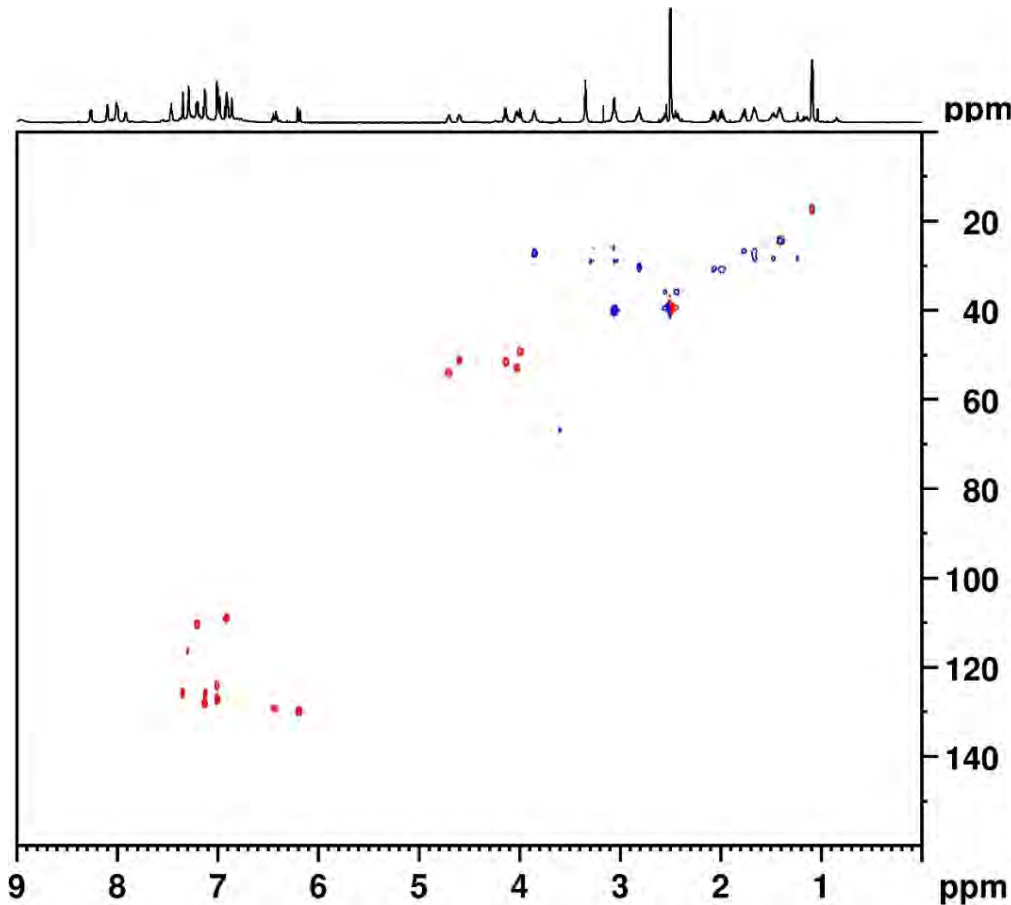

```

Current Data Parameters
NAME      W-A4-3-1
EXPNO    5
PROCNO   1

F2 - Acquisition Parameters
Date_    20121110
Time     12.52
INSTRUM  av500
PROBHD   5 mm DCH 13C-1
PULPROG  hsqcedetgp
TD       2048
SOLVENT  DMSO
NS       4
DS       16
SWH      5000.000 Hz
FIDRES   2.441406 Hz
AQ       0.2048000 sec
RG       202.91
DW       100.000 usec
DE       10.00 usec
TE       298.0 K
CNST2    145.0000000
D0       0.00000300 sec
D1       1.50000000 sec
D4       0.00172414 sec
D11      0.03000000 sec
D13      0.00000400 sec
D16      0.00020000 sec
D21      0.00345000 sec
IN0      0.00001990 sec
ZGORTNS

===== CHANNEL f1 =====
NUC1     1H
P1       10.00 usec
P2       20.00 usec
P28      0 usec
PLW1    13.50000000 W
SFO1    500.1325007 MHz

===== CHANNEL f2 =====
CPDRG[2] garp
NUC2     13C
P3       9.63 usec
P4       19.26 usec
PCPD2   70.00 usec
PLW2    23.01399994 W
PLW12   0.43557000 W
SFO2    125.7678496 MHz

===== GRADIENT CHANNEL =====
GPNAM[1] SMSQ10.100
GPNAM[2] SMSQ10.100
GPZ1     80.00 %

```

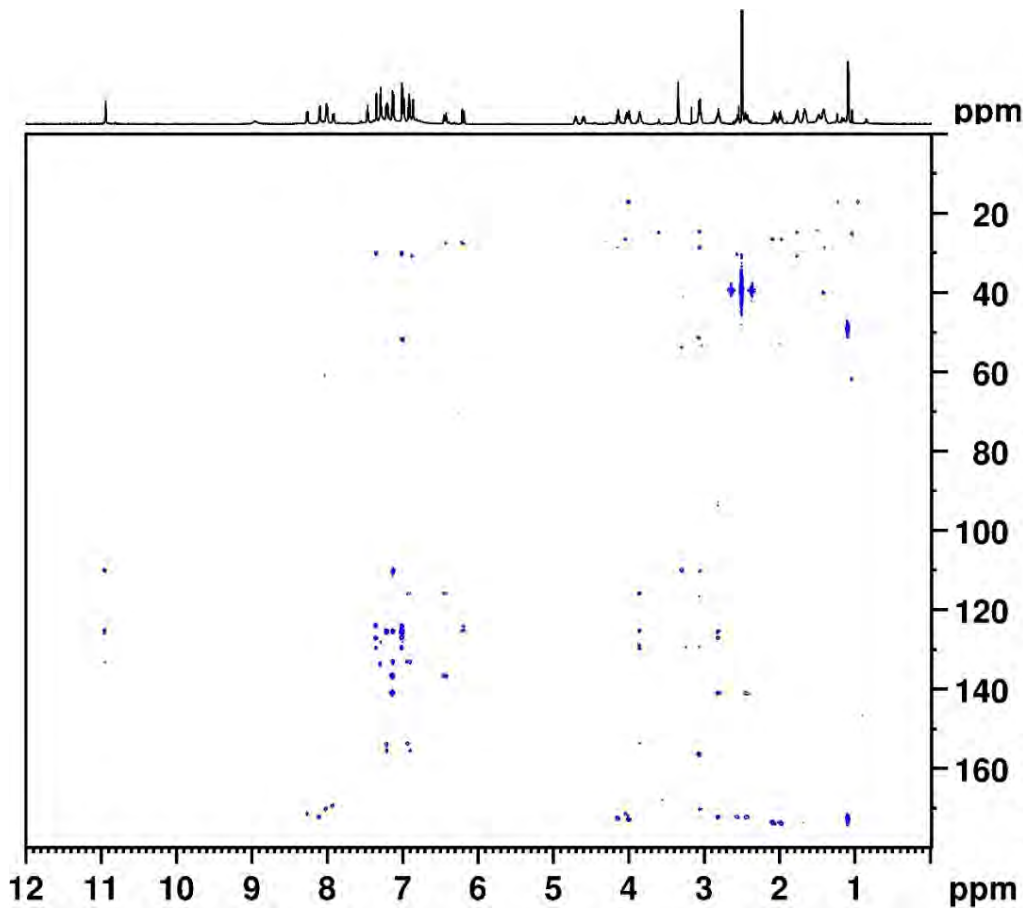

```

Current Data Parameters
NAME           W-A4-3-1
EXPNO          6
PROCNO         1

F2 - Acquisition Parameters
Date_          20121110
Time           13.22
INSTRUM        av500
PROBHD         5 mm DCH 13C-1
PULPROG        hmbcgp12ndqf
TD             2048
SOLVENT        DMSO
NS             8
DS             16
SWH            6009.615 Hz
FIDRES         2.934382 Hz
AQ            0.1703936 sec
RG            202.91
DW            83.200 usec
DE            10.00 usec
TE            298.0 K
CNST6         120.0000000
CNST7         160.0000000
CNST13        7.0000000
D0            0.00000300 sec
D1            1.50000000 sec
D6            0.07142857 sec
D16           0.00020000 sec
INO           0.00001990 sec

===== CHANNEL f1 =====
NUC1           1H
P1            10.00 usec
P2            20.00 usec
PLW1          13.50000000 W
SFO1          500.1330008 MHz

===== CHANNEL f2 =====
NUC2           13C
P3             9.63 usec
PLW2          23.01399994 W
SFO2          125.7703648 MHz

===== GRADIENT CHANNEL =====
GPNAM[1]      SMSQ10.100
GPNAM[2]      SMSQ10.100
GPNAM[3]      SMSQ10.100
GPNAM[4]      SMSQ10.100
GPNAM[5]      SMSQ10.100
GPNAM[6]      SMSQ10.100
GPZ1          50.00 %
GPZ2          30.00 %
GPZ3          40.10 %
GPZ4          15.00 %
  
```

Macroyclic Product 11d

```

Current Data Parameters
NAME      W-A4-4-17(2)
EXPNO    2
PROCNO   1

F2 - Acquisition Parameters
Date_    20121023
Time     18.51
INSTRUM  av500
PROBHD   5 mm DCH 13C-1
PULPROG  zg
TD        65536
SOLVENT  DMSO
NS        8
DS        0
SWH       10000.000 Hz
FIDRES    0.152588 Hz
AQ        3.2767999 sec
RG        20.17
DW        50.000 usec
DE        10.00 usec
TE        298.0 K
D1        2.0000000 sec
TD0       1
    
```

```

===== CHANNEL f1 =====
NUC1      1H
F1        10.00 usec
PLW1     13.5000000 W
SFO1     500.1330008 MHz

F2 - Processing parameters
SI        65536
SF        500.1300057 MHz
WDW       EM
SSB       0
LB        0.30 Hz
GB        0
PC        1.00
    
```

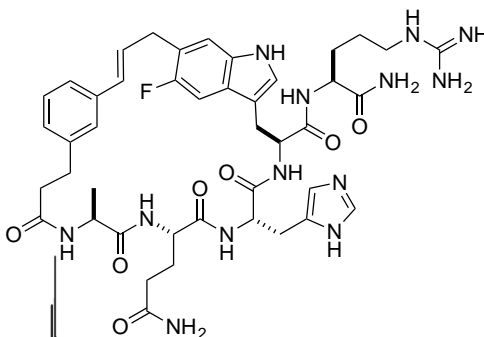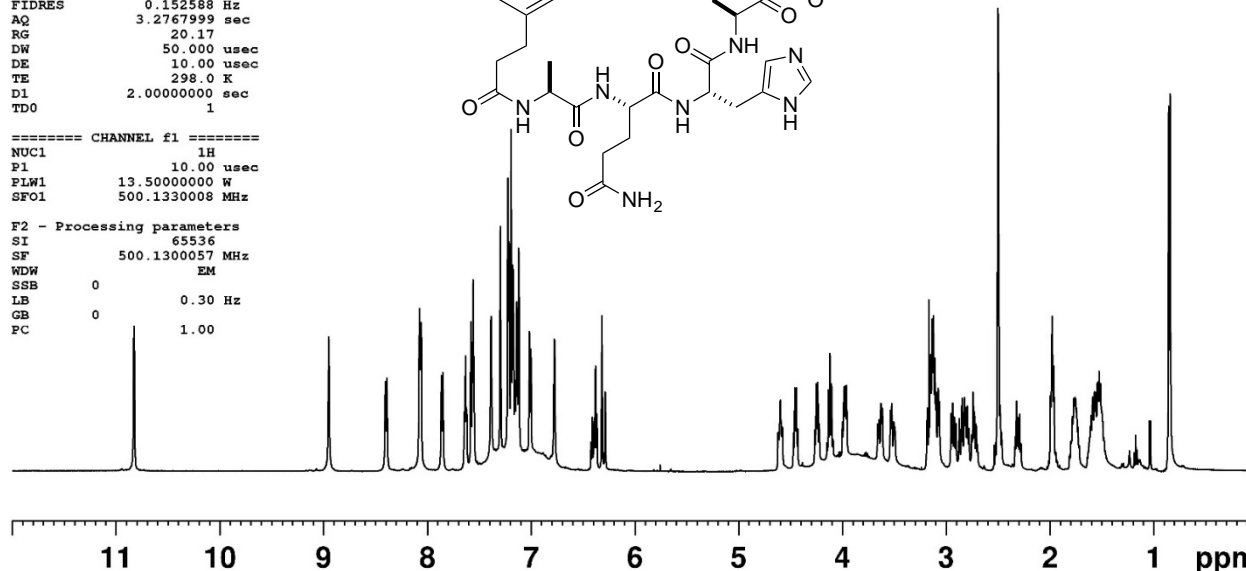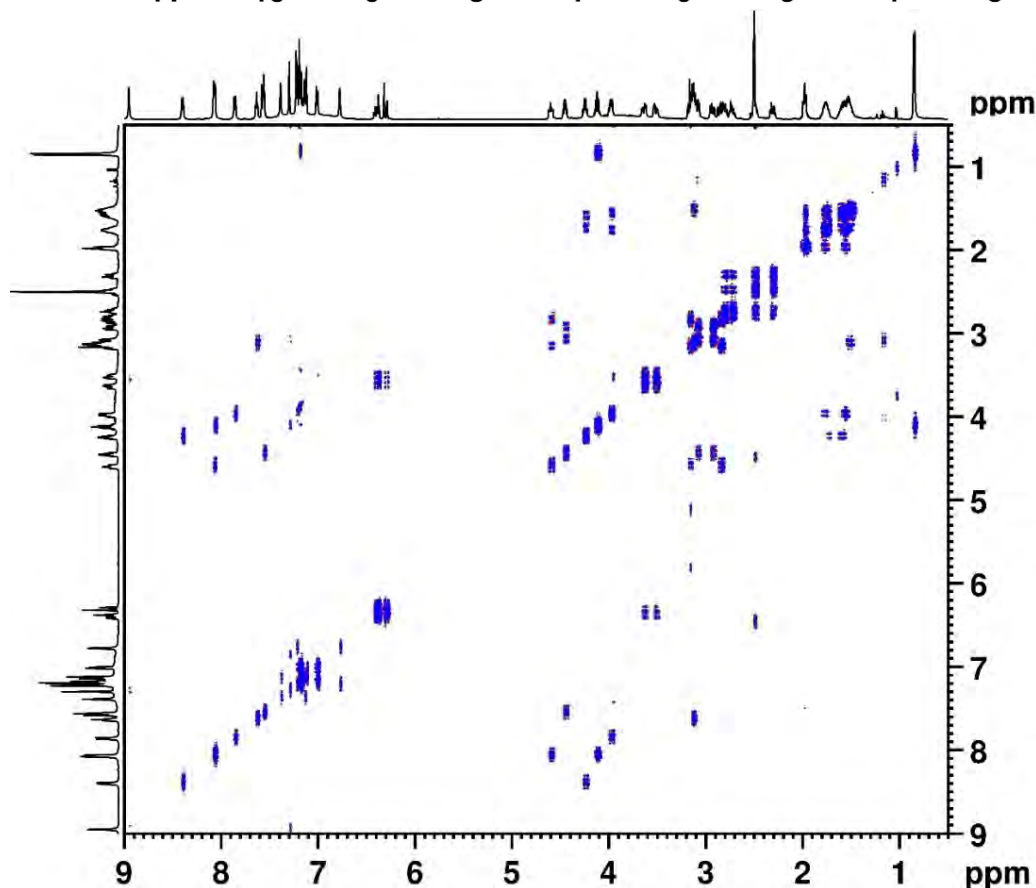

```

Current Data Parameters
NAME      W-A4-4-17(2)
EXPNO    3
PROCNO   1
    
```

```

F2 - Acquisition Parameters
Date_    20121023
Time     18.52
INSTRUM  av500
PROBHD   5 mm DCH 13C-1
PULPROG  cosygmph
TD        4096
SOLVENT  DMSO
NS        2
DS        8
SWH       5498.534 Hz
FIDRES    1.342415 Hz
AQ        0.3724629 sec
RG        202.91
DW        90.933 usec
DE        10.00 usec
TE        298.0 K
D0        0.00008724 sec
D1        2.0000000 sec
D13       0.00000400 sec
D16       0.00020000 sec
IN0       0.00019995 sec
    
```

```

===== CHANNEL f1 =====
NUC1      1H
P1        10.00 usec
P2        20.00 usec
PLW1     13.5000000 W
SFO1     500.1327507 MHz

===== GRADIENT CHANNEL =====
GP1AM[1]  SMSQ10.100
GP1AM[2]  SMSQ10.100
GPZ1      10.00 %
GPZ2      20.00 %
P16       1000.00 usec
    
```

```

F1 - Acquisition parameters
TD        256
SFO1     500.1328 MHz
FIDRES    19.536423 Hz
SW        10.000 ppm
FnMODE    States-TPPI
    
```

```

F2 - Processing parameters
SI        4096
SF        500.1300135 MHz
WDW       SINE
SSB       1
    
```

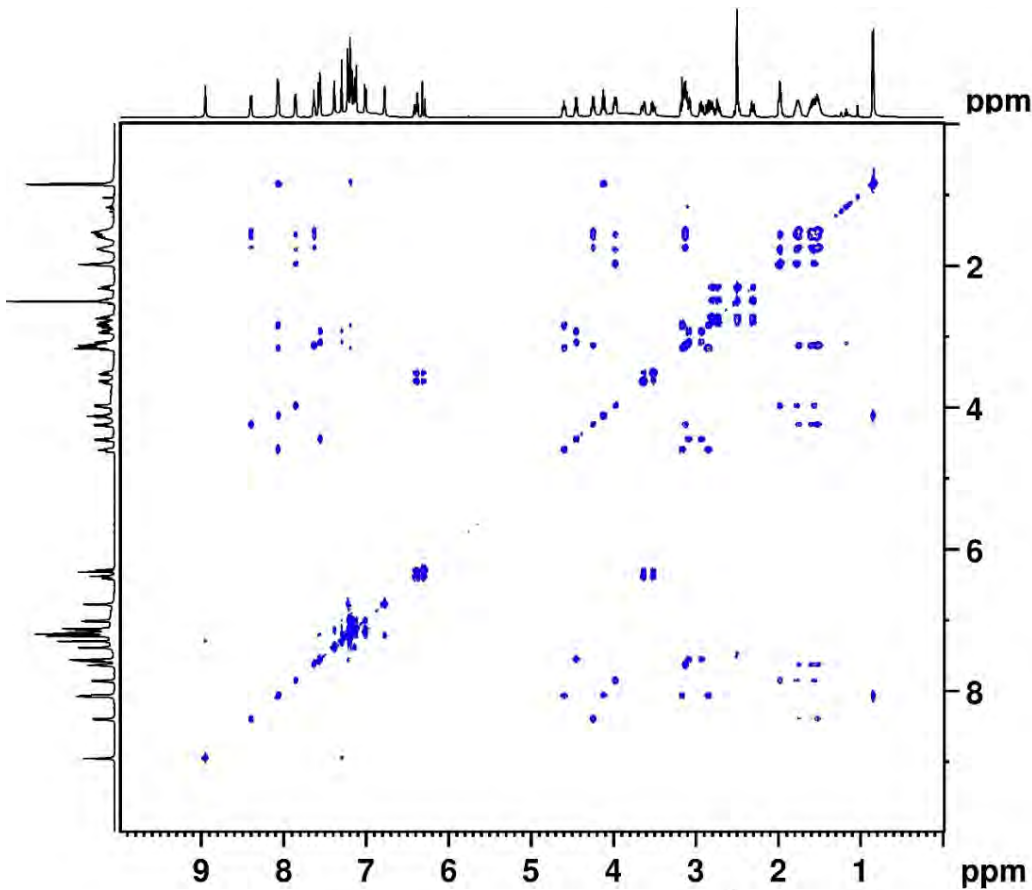

Current Data Parameters  
 NAME W-A4-4-17(2)  
 EXPNO 4  
 PROCNO 1

F2 - Acquisition Parameters  
 Date\_ 20121023  
 Time 19.13  
 INSTRUM av500  
 PROBHD 5 mm DCH 13C-1  
 PULPROG mlevetgp.js  
 TD 2048  
 SOLVENT DMSO  
 NS 2  
 DS 8  
 SWH 5000.000 Hz  
 FIDRES 2.441406 Hz  
 AQ 0.2048000 sec  
 RG 37.94  
 DW 100.000 usec  
 DE 10.00 usec  
 TE 298.0 K  
 D0 0.00000300 sec  
 D1 2.00000000 sec  
 D9 0.06000000 sec  
 D11 0.03000000 sec  
 D12 0.00002000 sec  
 D16 0.00020000 sec  
 IN0 0.00019995 sec  
 L1 24

===== CHANNEL f1 =====  
 NUC1 1H  
 P1 10.00 usec  
 P2 20.00 usec  
 P5 26.68 usec  
 P6 40.00 usec  
 P7 80.00 usec  
 P17 2500.00 usec  
 PLW1 13.50000000 W  
 PLW10 0.84375000 W  
 SFO1 500.1325007 MHz

===== GRADIENT CHANNEL =====  
 GPNAM[1] SINE.100  
 GPNAM[2] SINE.100  
 GPZ1 30.00 %  
 GPZ2 30.00 %  
 P16 1000.00 usec

F1 - Acquisition parameters  
 TD 256  
 SFO1 500.1325 MHz  
 FIDRES 19.536406 Hz

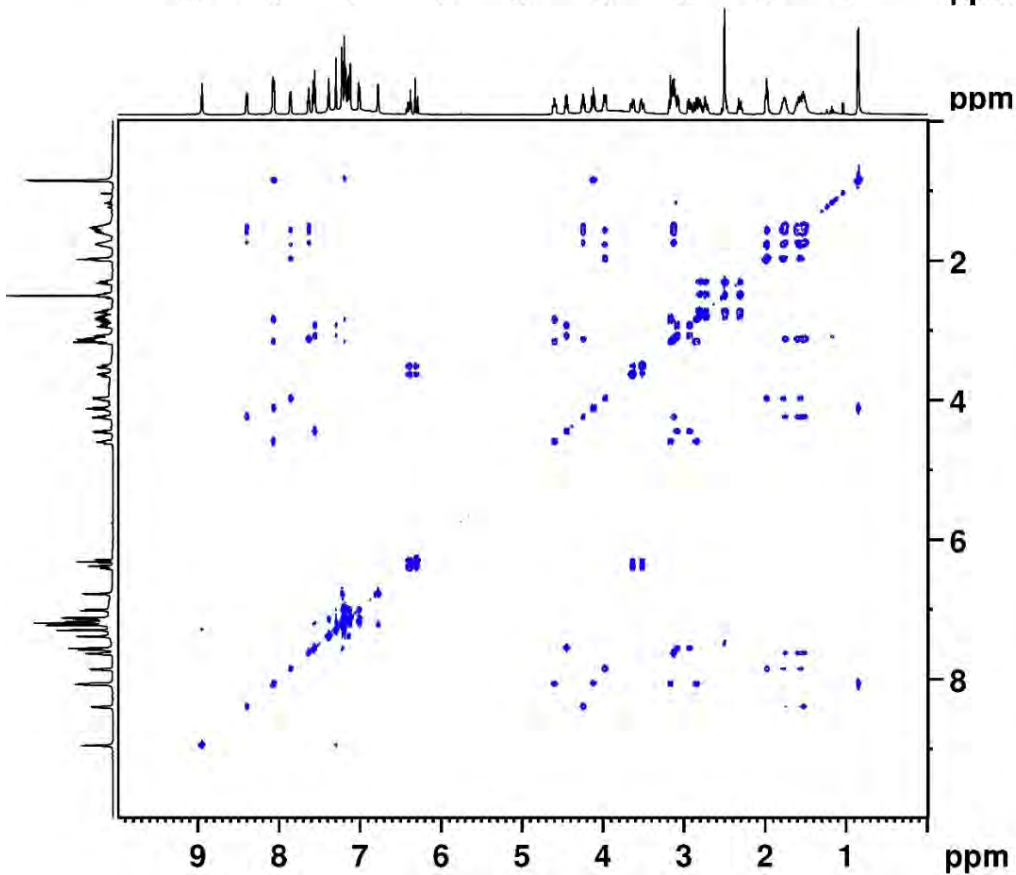

Current Data Parameters  
 NAME W-A4-4-17(2)  
 EXPNO 4  
 PROCNO 1

F2 - Acquisition Parameters  
 Date\_ 20121023  
 Time 19.13  
 INSTRUM av500  
 PROBHD 5 mm DCH 13C-1  
 PULPROG mlevetgp.js  
 TD 2048  
 SOLVENT DMSO  
 NS 2  
 DS 8  
 SWH 5000.000 Hz  
 FIDRES 2.441406 Hz  
 AQ 0.2048000 sec  
 RG 37.94  
 DW 100.000 usec  
 DE 10.00 usec  
 TE 298.0 K  
 D0 0.00000300 sec  
 D1 2.00000000 sec  
 D9 0.06000000 sec  
 D11 0.03000000 sec  
 D12 0.00002000 sec  
 D16 0.00020000 sec  
 IN0 0.00019995 sec  
 L1 24

===== CHANNEL f1 =====  
 NUC1 1H  
 P1 10.00 usec  
 P2 20.00 usec  
 P5 26.68 usec  
 P6 40.00 usec  
 P7 80.00 usec  
 P17 2500.00 usec  
 PLW1 13.50000000 W  
 PLW10 0.84375000 W  
 SFO1 500.1325007 MHz

===== GRADIENT CHANNEL =====  
 GPNAM[1] SINE.100  
 GPNAM[2] SINE.100  
 GPZ1 30.00 %  
 GPZ2 30.00 %  
 P16 1000.00 usec

F1 - Acquisition parameters  
 TD 256  
 SFO1 500.1325 MHz  
 FIDRES 19.536406 Hz

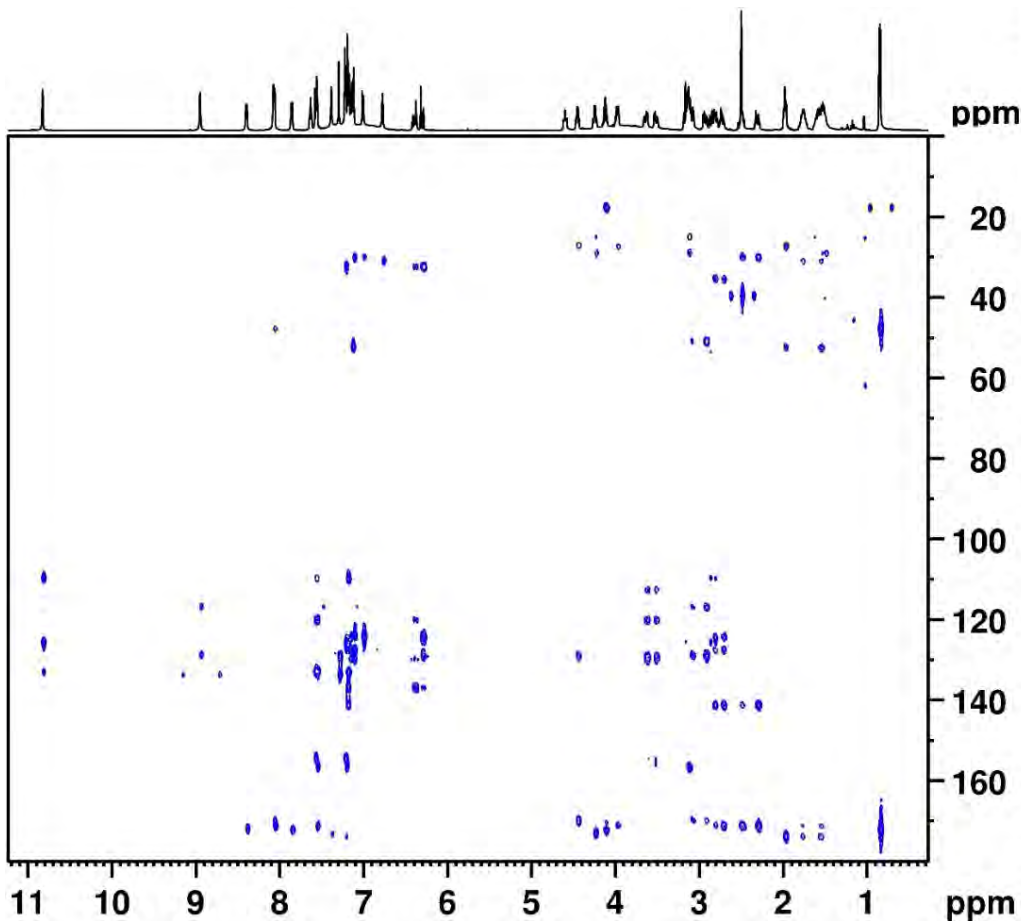

Current Data Parameters  
 NAME W-A4-4-17(2)  
 EXPNO 6  
 PROCNO 1

F2 - Acquisition Parameters

Date\_ 20121023  
 Time 19.49  
 INSTRUM av500  
 PROBHD 5 mm DCH 13C-1  
 PULPROG hmbcgp12ndqf  
 TD 2048  
 SOLVENT DMSO  
 NS 6  
 DS 16  
 SWH 6009.615 Hz  
 FIDRES 2.934382 Hz  
 AQ 0.1703936 sec  
 RG 202.91  
 DW 83.200 usec  
 DE 10.00 usec  
 TE 298.0 K  
 CNST6 120.0000000  
 CNST7 160.0000000  
 CNST13 7.0000000  
 D0 0.00000300 sec  
 D1 1.50000000 sec  
 D6 0.07142857 sec  
 D16 0.00020000 sec  
 IN0 0.00001990 sec

===== CHANNEL f1 =====  
 NUC1 1H  
 P1 10.00 usec  
 P2 20.00 usec  
 PLW1 13.50000000 W  
 SFO1 500.1330008 MHz

===== CHANNEL f2 =====  
 NUC2 13C  
 P3 9.63 usec  
 PLW2 23.01399994 W  
 SFO2 125.7703648 MHz

===== GRADIENT CHANNEL =====  
 GPNAM[1] SMSQ10.100  
 GPNAM[2] SMSQ10.100  
 GPNAM[3] SMSQ10.100  
 GPNAM[4] SMSQ10.100  
 GPNAM[5] SMSQ10.100  
 GPNAM[6] SMSQ10.100  
 GPZ1 50.00 %  
 GPZ2 30.00 %  
 GPZ3 40.10 %  
 GPZ4 15.00 %



Macroyclic Product 11e

Current Data Parameters  
 NAME W-A4-1-1\_AV500  
 EXPNO 8  
 PROCNO 1

F2 - Acquisition Parameters  
 Date\_ 20140222  
 Time 20.16  
 INSTRUM av500  
 PROBHD 5 mm DCH 13C-1  
 PULPROG zgpr  
 TD 65536  
 SOLVENT DMSO  
 NS 15  
 DS 0  
 SWH 10000.000 Hz  
 FIDRES 0.152588 Hz  
 AQ 3.2767999 sec  
 RG 12.14  
 DW 50.000 usec  
 DE 10.00 usec  
 TE 298.0 K  
 D1 2.00000000 sec  
 D12 0.00002000 sec  
 TD0 1

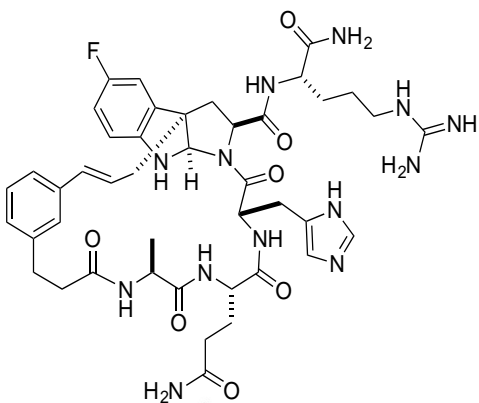

===== CHANNEL f1 =====  
 SFO1 500.1316829 MHz  
 NUC1 1H  
 P1 10.00 usec  
 PLW1 13.50000000 W  
 PLW9 0.00005400 W

F2 - Processing parameters  
 SI 65536  
 SF 500.1300040 MHz  
 WDW EM  
 SSB 0  
 LB 0.30 Hz  
 GB 0  
 PC 1.40

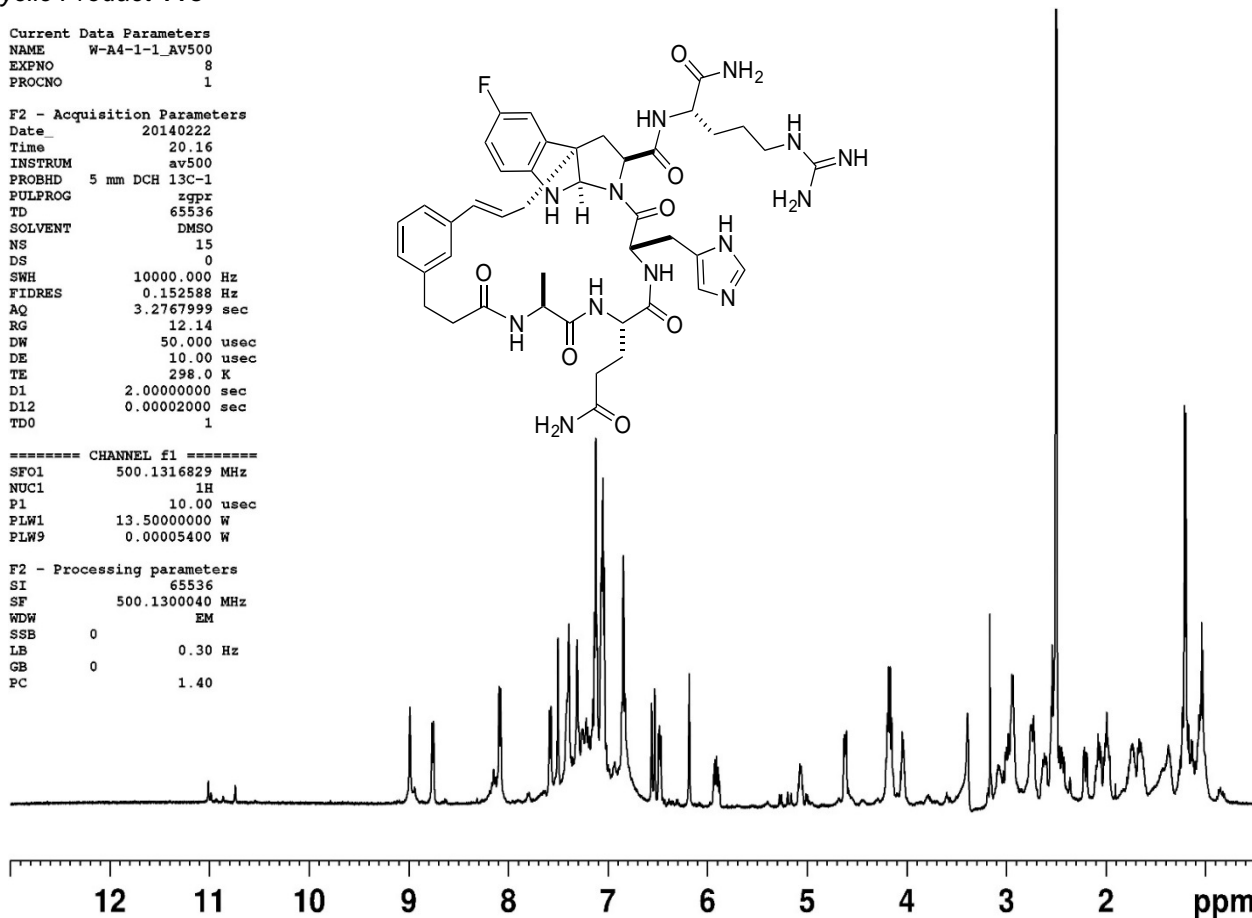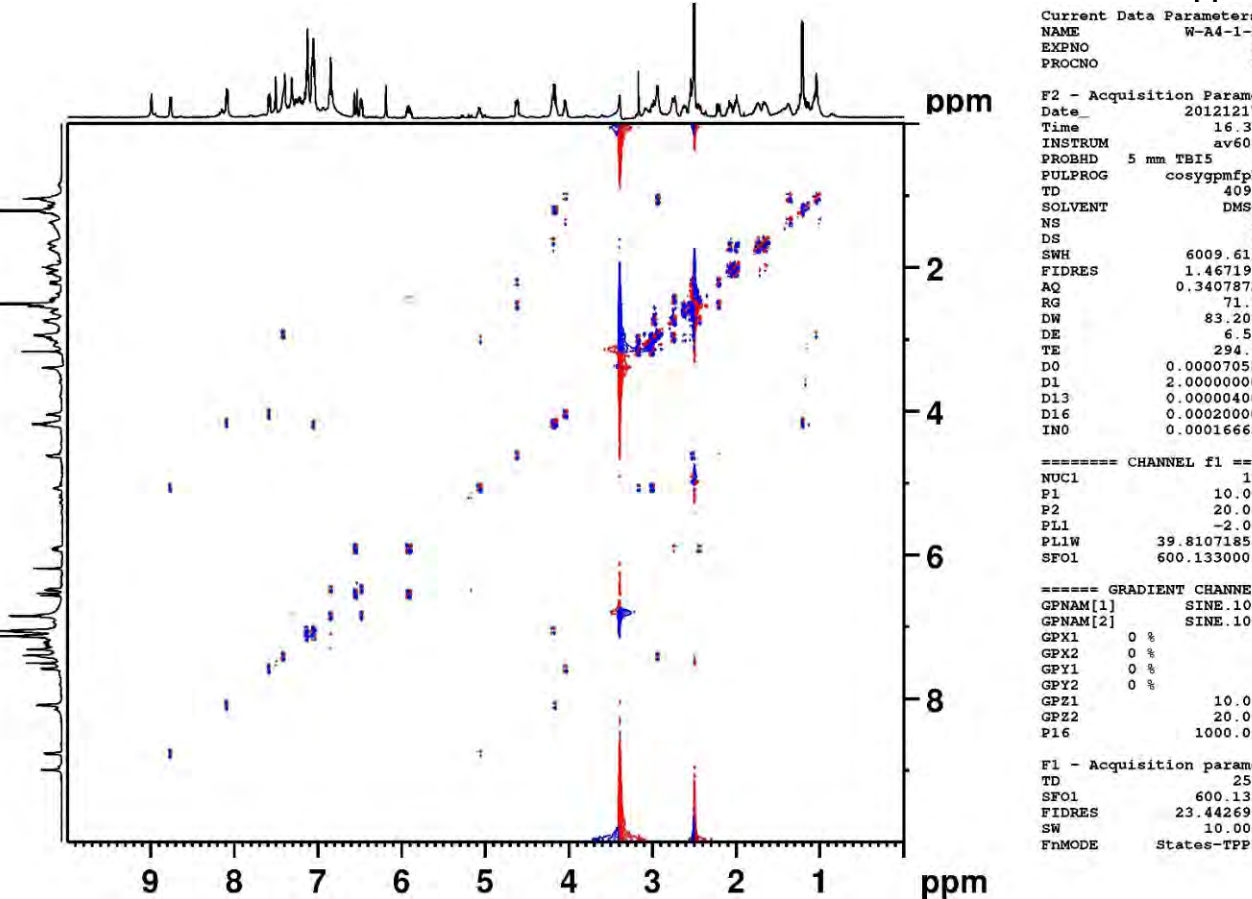

Current Data Parameters  
 NAME W-A4-1-1  
 EXPNO 3  
 PROCNO 1

F2 - Acquisition Parameters  
 Date\_ 20121217  
 Time 16.36  
 INSTRUM av600  
 PROBHD 5 mm TBI5  
 PULPROG cosygpmfph  
 TD 4096  
 SOLVENT DMSO  
 NS 8  
 DS 4  
 SWH 6009.615 Hz  
 FIDRES 1.467191 Hz  
 AQ 0.3407872 sec  
 RG 71.8  
 DW 83.200 usec  
 DE 6.50 usec  
 TE 294.0 K  
 D0 0.00007058 sec  
 D1 2.00000000 sec  
 D13 0.00000400 sec  
 D16 0.00020000 sec  
 IN0 0.00016665 sec

===== CHANNEL f1 =====  
 NUC1 1H  
 P1 10.00 usec  
 P2 20.00 usec  
 PL1 -2.00 dB  
 PL1W 39.81071854 W  
 SFO1 600.1330006 MHz

===== GRADIENT CHANNEL =====  
 GPNAM[1] SINE.100  
 GPNAM[2] SINE.100  
 GPX1 0 %  
 GPX2 0 %  
 GPY1 0 %  
 GPY2 0 %  
 GPZ1 10.00 %  
 GPZ2 20.00 %  
 P16 1000.00 usec

F1 - Acquisition parameters  
 TD 256  
 SFO1 600.133 MHz  
 FIDRES 23.442696 Hz  
 SW 10.000 ppm  
 FMODE States-TPPI

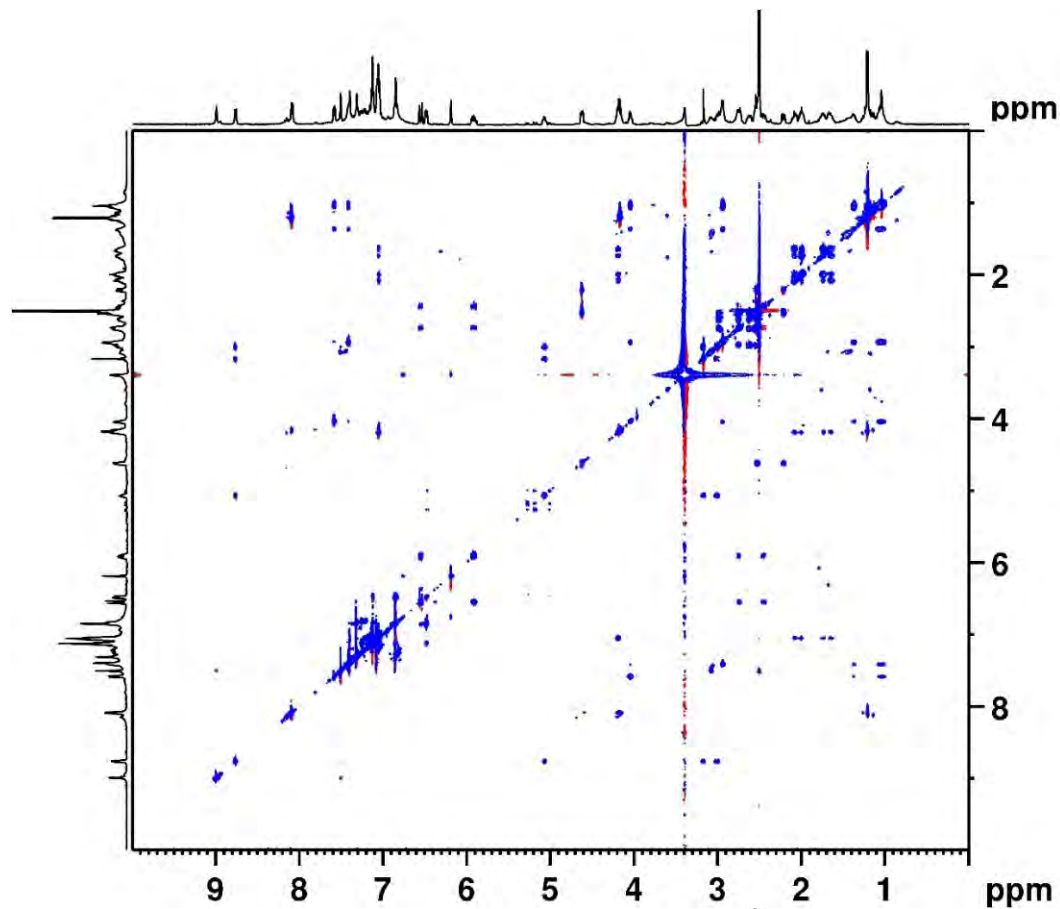

```

Current Data Parameters
NAME      W-A4-1-1
EXPNO    4
PROCNO   1

F2 - Acquisition Parameters
Date_    20121217
Time     17.57
INSTRUM  av600
PROBHD   5 mm TBI5
PULPROG  mlevetgp.js
TD       4096
SOLVENT  DMSO
NS       4
DS       16
SWH      6009.615 Hz
FIDRES   1.467191 Hz
AQ       0.3407872 sec
RG       71.8
DW       83.200 usec
DE       6.50 usec
TE       294.0 K
D0       0.00000300 sec
D1       1.20000005 sec
D9       0.06000000 sec
D11      0.03000000 sec
D12      0.00002000 sec
D16      0.00020000 sec
IN0      0.00016665 sec
L1       24
  
```

```

===== CHANNEL f1 =====
NUC1     1H
P1       10.00 usec
P2       20.00 usec
P5       26.68 usec
P6       40.00 usec
P7       80.00 usec
P17      2500.00 usec
PL1      -2.00 dB
PL10     9.54 dB
PL1W     39.81071854 W
PL10W    2.79254389 W
SFO1     600.1330006 MHz

===== GRADIENT CHANNEL =====
GPNAM[1] SINE.100
GPNAM[2] SINE.100
GPX1     0 %
GPX2     0 %
GPY1     0 %
GPY2     0 %
GPZ1     30.00 %
GPZ2     30.00 %
  
```

```

Current Data Parameters
NAME      W-A4-1-1_AV500
EXPNO    7
PROCNO   1
  
```

```

F2 - Acquisition Parameters
Date_    20140223
Time     4.31
INSTRUM  av500
PROBHD   5 mm DCH 13C-1
PULPROG  noesygpph
TD       2048
SOLVENT  DMSO
NS       16
DS       8
SWH      5000.000 Hz
FIDRES   2.441406 Hz
AQ       0.2048000 sec
RG       26.58
DW       100.000 usec
DE       10.00 usec
TE       298.0 K
D0       0.00008727 sec
D1       2.00000000 sec
D8       0.20000000 sec
D16      0.00020000 sec
IN0      0.00020000 sec
  
```

```

===== CHANNEL f1 =====
SFO1     500.1325007 MHz
NUC1     1H
P1       10.00 usec
P2       20.00 usec
PLW1     13.50000000 W

===== GRADIENT CHANNEL =====
GPNAM[1] SINE.100
GPZ1     40.00 %
P16      1000.00 usec
  
```

```

F1 - Acquisition parameters
TD       256
SFO1     500.1325 MHz
FIDRES   19.531250 Hz
SW       9.997 ppm
FnMODE   States-TPPI
  
```

```

F2 - Processing parameters
SI       2048
SF       500.1300036 MHz
WDW      QSINE
SSB      2
LB       0 Hz
GB       0
  
```

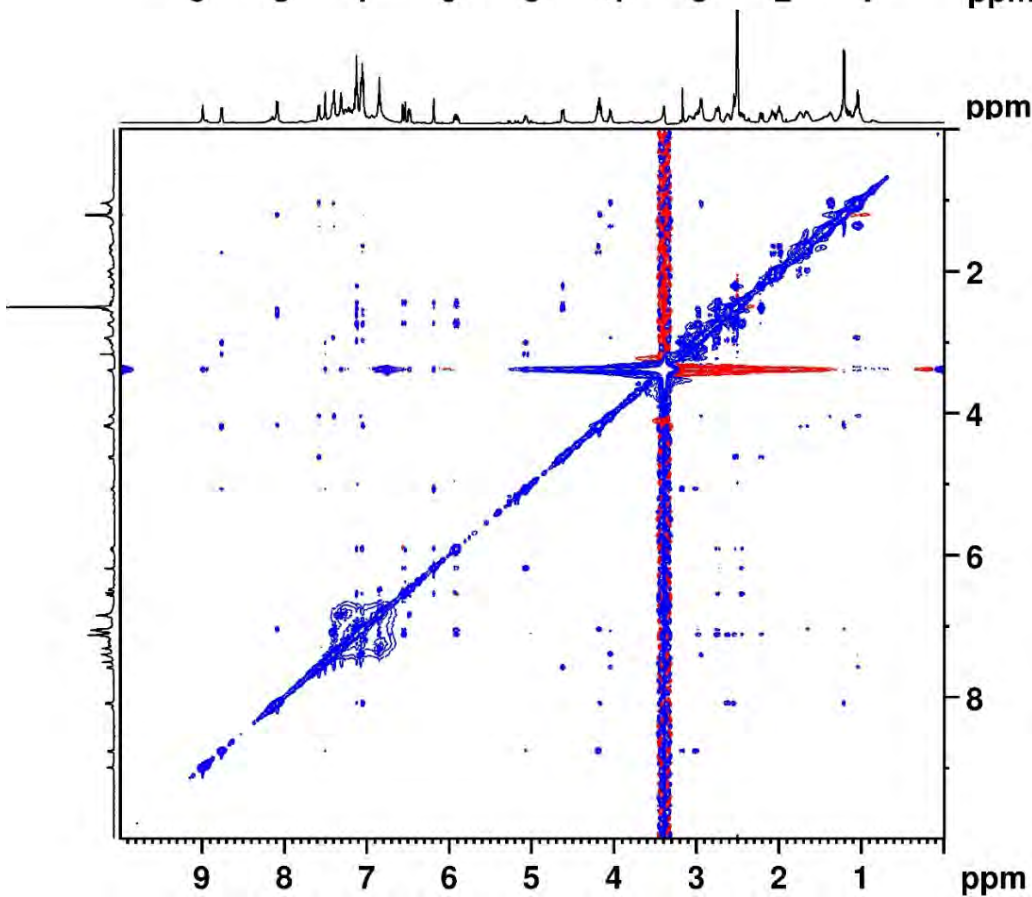

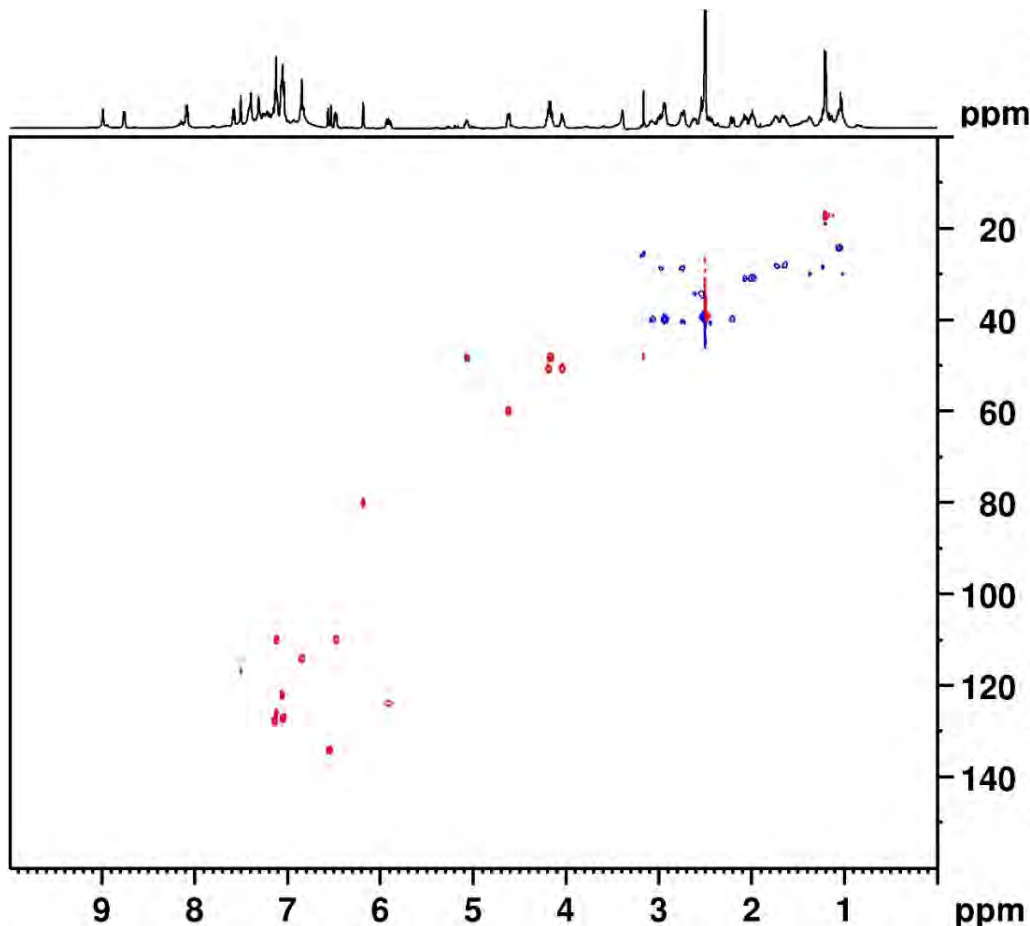

Current Data Parameters  
 NAME W-A4-1-1\_AV500  
 EXPNO 2  
 PROCNO 1

F2 - Acquisition Parameters  
 Date\_ 20121219  
 Time 17.14  
 INSTRUM av500  
 PROBHD 5 mm DCH 13C-1  
 PULPROG hsqcedetgp  
 TD 2048  
 SOLVENT DMSO  
 NS 6  
 DS 16  
 SWH 5000.000 Hz  
 FIDRES 2.441406 Hz  
 AQ 0.2048000 sec  
 RG 202.91  
 DW 100.000 usec  
 DE 10.00 usec  
 TE 298.0 K  
 CNST2 145.0000000  
 D0 0.00000300 sec  
 D1 1.50000000 sec  
 D4 0.00172414 sec  
 D11 0.03000000 sec  
 D13 0.00000400 sec  
 D16 0.00020000 sec  
 D21 0.00345000 sec  
 IN0 0.00001990 sec  
 ZGPTNS

===== CHANNEL f1 =====  
 SFO1 500.1325007 MHz  
 NUC1 1H  
 P1 10.00 usec  
 P2 20.00 usec  
 P28 0 usec  
 PLW1 13.50000000 W

===== CHANNEL f2 =====  
 SFO2 125.7678496 MHz  
 NUC2 13C  
 CPDPRG[2] garp  
 P3 9.63 usec  
 P4 19.26 usec  
 PCDP2 70.00 usec  
 PLW2 23.01399994 W  
 PLW12 0.43557000 W

===== GRADIENT CHANNEL =====  
 GPNAM[1] SMSQ10.100  
 GPNAM[2] SMSQ10.100  
 GPZ1 80.00 %

Current Data Parameters  
 NAME W-A4-1-1\_AV500  
 EXPNO 6  
 PROCNO 1

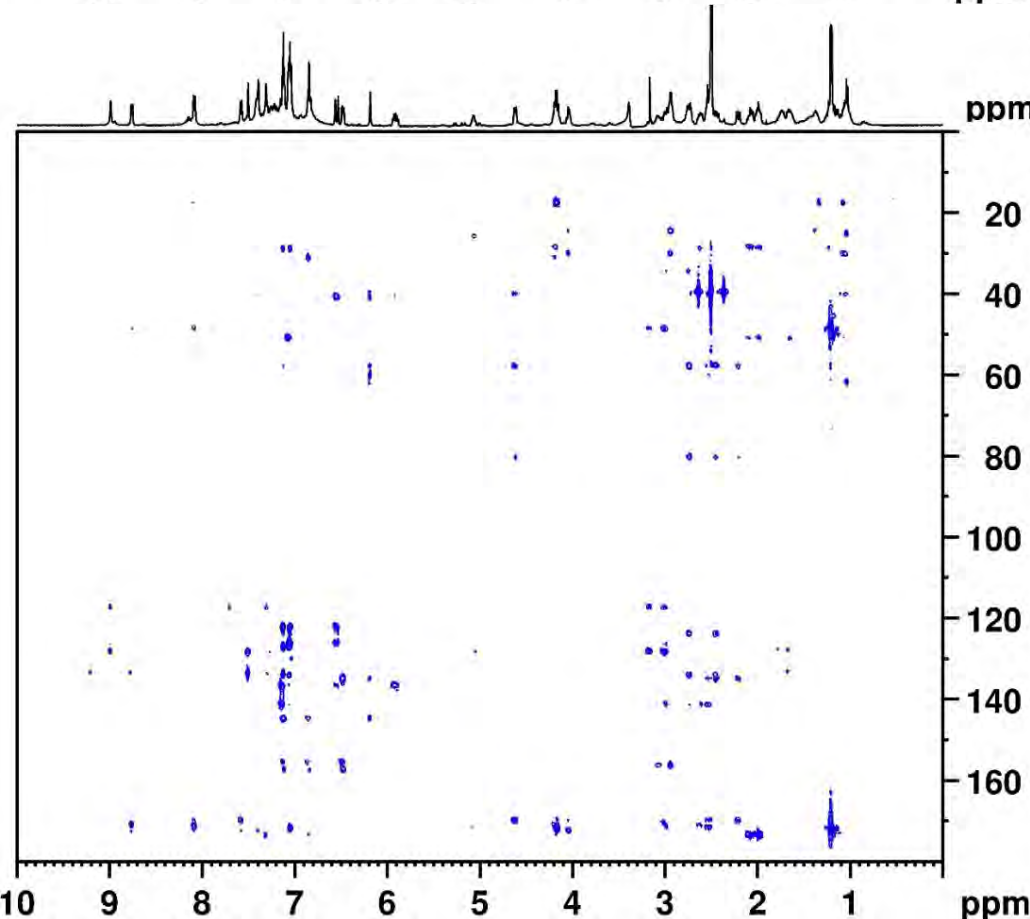

F2 - Acquisition Parameters  
 Date\_ 20140222  
 Time 20.21  
 INSTRUM av500  
 PROBHD 5 mm DCH 13C-1  
 PULPROG hmbcgp12ndqf  
 TD 2048  
 SOLVENT DMSO  
 NS 64  
 DS 16  
 SWH 5000.000 Hz  
 FIDRES 2.441406 Hz  
 AQ 0.2048000 sec  
 RG 204.86  
 DW 100.000 usec  
 DE 10.00 usec  
 TE 298.0 K  
 CNST6 120.0000000  
 CNST7 160.0000000  
 CNST13 7.0000000  
 D0 0.00000300 sec  
 D1 1.50000000 sec  
 D6 0.07142857 sec  
 D16 0.00020000 sec  
 IN0 0.00001990 sec

===== CHANNEL f1 =====  
 SFO1 500.1325007 MHz  
 NUC1 1H  
 P1 10.00 usec  
 P2 20.00 usec  
 PLW1 13.50000000 W

===== CHANNEL f2 =====  
 SFO2 125.7703648 MHz  
 NUC2 13C  
 P3 9.63 usec  
 PLW2 23.01399994 W

===== GRADIENT CHANNEL =====  
 GPNAM[1] SMSQ10.100  
 GPNAM[2] SMSQ10.100  
 GPNAM[3] SMSQ10.100  
 GPNAM[4] SMSQ10.100  
 GPNAM[5] SMSQ10.100  
 GPNAM[6] SMSQ10.100  
 GPZ1 50.00 %  
 GPZ2 30.00 %  
 GPZ3 40.10 %  
 GPZ4 15.00 %

Acyclic Precursor 12

Current Data Parameters  
 NAME BC-III-214  
 EXPNO 1  
 PROCNO 1  
 F2 - Acquisition Parameters  
 Date\_ 20150515  
 Time 10.20  
 INSTRUM drx500  
 PROBHD 5 mm bb-Z 2800  
 PULPROG zg30  
 TD 65536  
 SOLVENT DMSO  
 NS 27  
 DS 0  
 SWH 10000.000 Hz  
 FIDRES 0.152588 Hz  
 AQ 3.2768500 sec  
 RG 181  
 DW 50.000 usec  
 DE 6.00 usec  
 TE 296.3 K  
 D1 2.00000000 sec  
 TD0 1

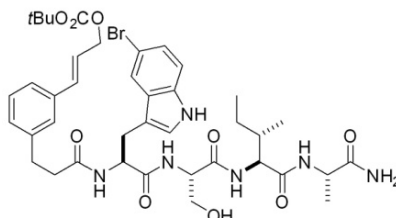

===== CHANNEL f1 =====  
 NUC1 1H  
 P1 12.25 usec  
 PL1 0 dB  
 SF01 500.3330020 MHz  
 F2 - Processing parameters  
 SI 32768  
 SF 500.3300220 MHz  
 WDW EM  
 SSB 0  
 LB 0.30 Hz  
 GB 0  
 PC 1.00

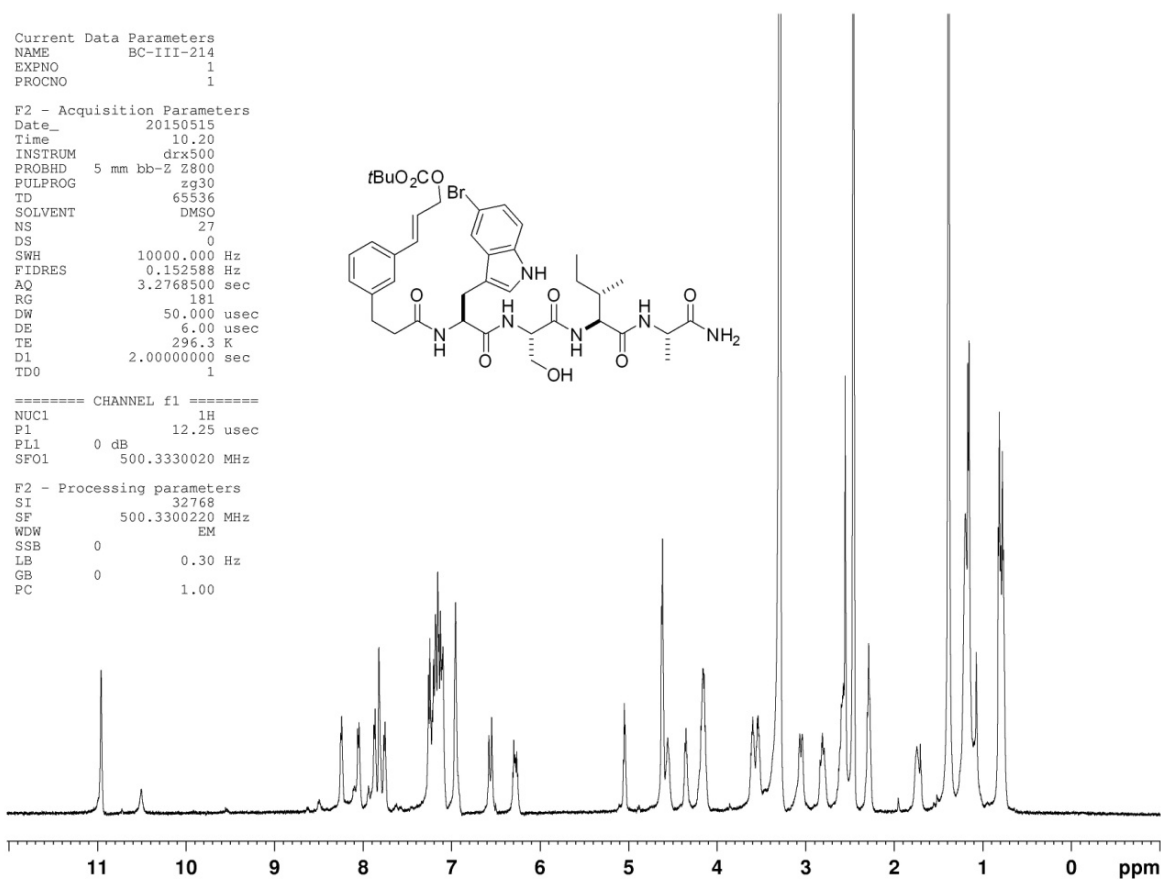

174.05  
 171.88  
 171.29  
 170.27  
 170.22  
 152.81  
 141.71  
 135.81  
 134.72  
 133.43  
 129.28  
 129.60  
 129.60  
 126.39  
 125.97  
 125.65  
 124.18  
 123.28  
 123.22  
 120.26  
 119.26  
 111.04  
 110.12  
 81.53  
 66.92  
 61.50  
 57.13  
 54.93  
 53.23  
 47.99  
 36.92  
 36.69  
 30.95  
 27.39  
 24.07  
 18.15  
 15.41  
 11.39

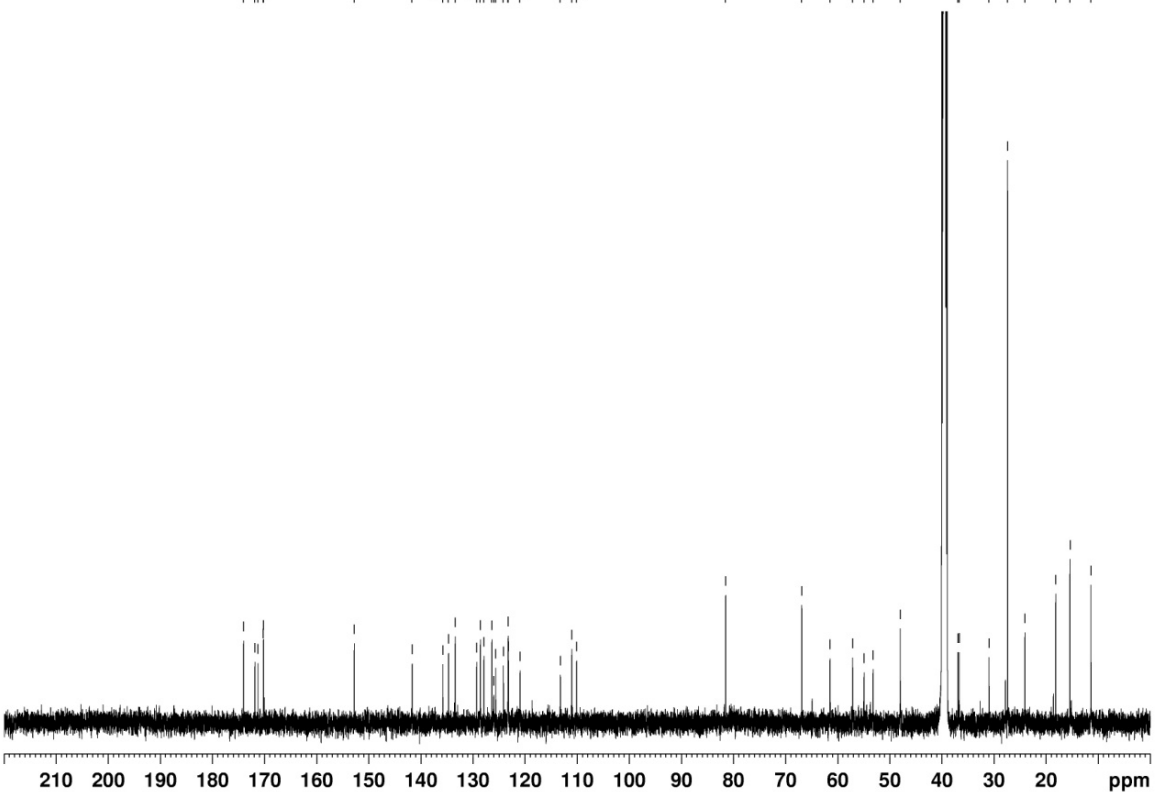

Macrocyclic Product 16a

```

Current Data Parameters
NAME      BC-III-222A
EXPNO    2
PROCNO   1

F2 - Acquisition Parameters
Date_    20150518
Time     18.05
INSTRUM  av600
PROBHD   5 mm TBI5
PULPROG  zg
TD        65536
SOLVENT  DMSO
NS        16
DS        0
SWH       12376.237 Hz
FIDRES    0.188846 Hz
AQ        2.6477044 sec
RG         45.3
DW        40.400 usec
DE        6.50 usec
TE        298.0 K
D1        2.00000000 sec
TD0       1
  
```

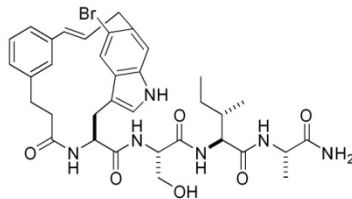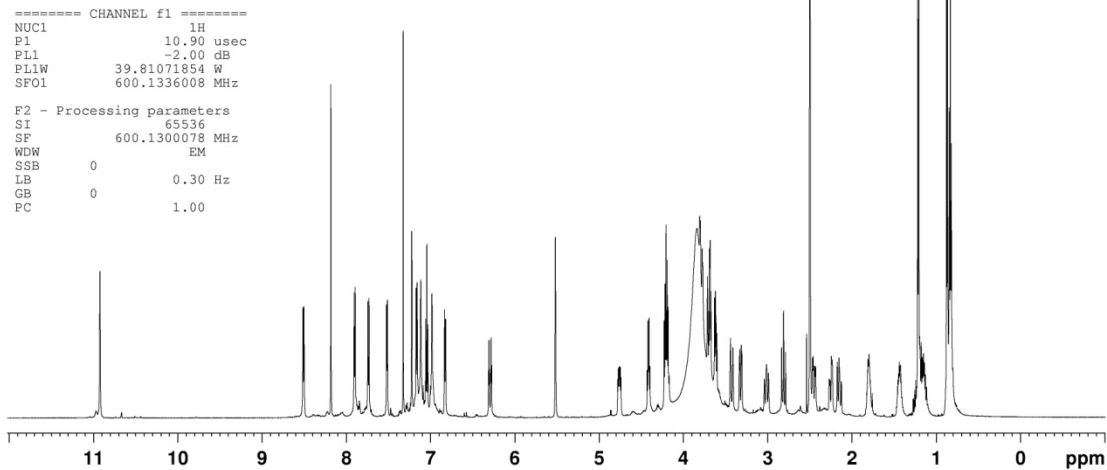

```

Current Data Parameters
NAME      BC-III-222A
EXPNO    6
PROCNO   1

F2 - Acquisition Parameters
Date_    20150518
Time     18.09
INSTRUM  av600
PROBHD   5 mm TBI5
PULPROG  cosypprgf
TD        2048
SOLVENT  DMSO
NS        2
DS        16
SWH       7183.508 Hz
FIDRES    3.507768 Hz
AQ        0.1425908 sec
RG         362
DW        69.600 usec
DE        6.50 usec
TE        298.0 K
D0        0.00000300 sec
D1        1.00000000 sec
D11       0.03000000 sec
D12       0.00002000 sec
D16       0.00020000 sec
IN0       0.00013920 sec
  
```

```

----- CHANNEL f1 -----
NUC1      1H
P1        8.00 usec
PL1       10.94 usec
PL11      -2.00 dB
PL19      120.00 dB
PL1W      39.81071854 W
PL1SW     0 W
SF01      600.1336008 MHz

----- GRADIENT CHANNEL -----
GPNAM1    SINE.100
GFX1      0 %
GPF1      0 %
GPF11     10.00 %
GPF12     1000.00 usec
P16

F1 - Acquisition parameters
TD         512
SF01      600.1336 MHz
FIDRES     14.031077 Hz
SW         11.971 ppm
F2MODE     QF

F2 - Processing parameters
SI         4096
SF         600.1300091 MHz
WDW        QSINE
SSB        1.5
LB         0 Hz
GB         0
PC         1.00

F1 - Processing parameters
SI         4096
SF         600.1300070 MHz
WDW        QSINE
SSB        1.5
LB         0 Hz
GB         0
PC         1.00
  
```

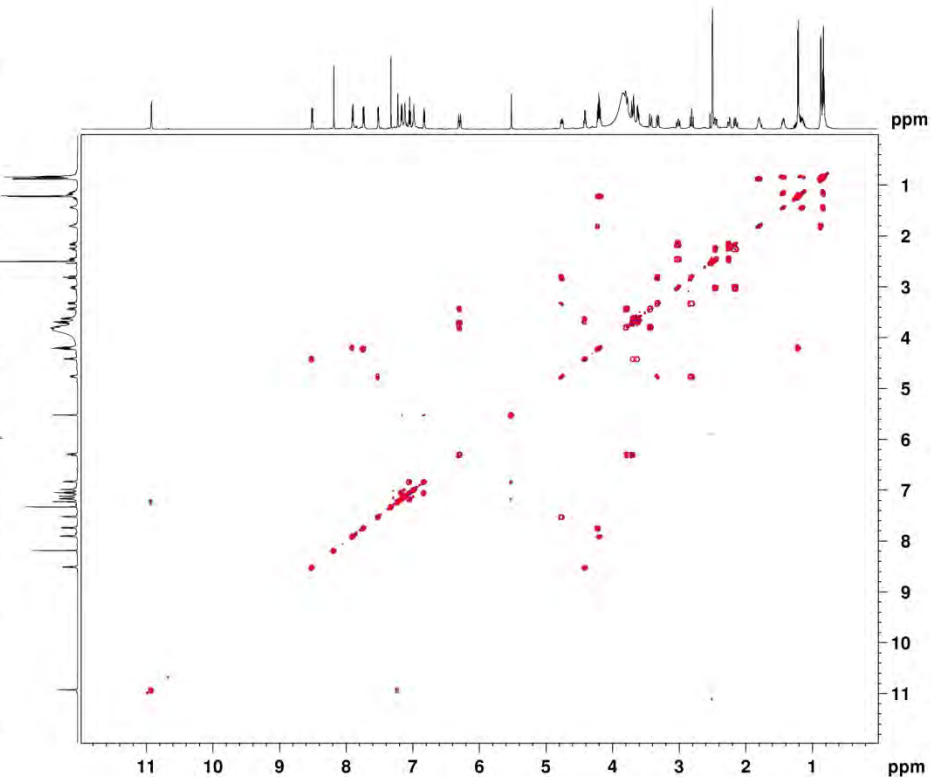

```

Current Data Parameters
NAME      BC-11-222A
EXPNO    7
PROCNO   3

F2 - Acquisition Parameters
Date_    20150318
Time     15:33
INSTRUM  spect
PROBHD   5 mm TBI5
PULPROG  zgpg30
TD        65536
SOLVENT  DMSO
NS        2
DS        4
SWH       7788.362 Hz
FIDRES    3.802514 Hz
AQ        0.1315218 sec
RG         363.5
DM        84.200 usec
DE        6.30 usec
TE        298.2 K
D0         0.0000374 sec
D1         1.0000000 sec
D2         0.0400000 sec
D3         0.0000000 sec
D16       0.0002000 sec
IN0       0.0001284 sec
IC        2

===== CHANNEL F1 =====
NUC1      1H
P1        19.90 usec
P2        23.40 usec
P3        26.48 usec
P4        40.00 usec
P5        80.00 usec
P6        3000.00 usec
P7        2800.00 usec
P8        120.00 dB
P9        -2.00 dB
P10       4.25 dB
P11       0 W
P12       39.8107284 MHz
P13       2.94801258 MHz
SFO1      600.1300935 MHz
SFO2      125.00 MHz
SFO3      Squal00.1000
SFO4      1.000
SFO5      -1456.44 Hz

===== GRADIENT CHANNEL =====
GPMAX1    210.100
GPMAX2    210.100
GPR1      0 %
GPR2      0 %
GPR3      0 %
GPR4      0 %
GPR5      0 %
GPR6      0 %
GPR7      0 %
GPR8      0 %
GPR9      0 %
GPR10     0 %
GPR11     0 %
GPR12     0 %
GPR13     0 %
GPR14     0 %
GPR15     0 %
GPR16     0 %
GPR17     0 %
GPR18     0 %
GPR19     0 %
GPR20     0 %
GPR21     31.00 %
GPR22     11.00 %
GPR23     0 %
GPR24     1000.00 usec

F1 - Acquisition parameters
TD        65536
SFO1      600.1300935 MHz
SFO2      125.0000000 MHz
SFO3      15.211276 Hz
SFO4      32.977 ppm
FMODE     States-2DFT

F2 - Processing parameters
SI        4096
SF        600.1300935 MHz
WDW       QSI
SSB       0
GB        0
PC        1.00

F1 - Processing parameters
SI        4096
SF        600.1300935 MHz
WDW       QSI
SSB       0
GB        0
PC        1.00

```

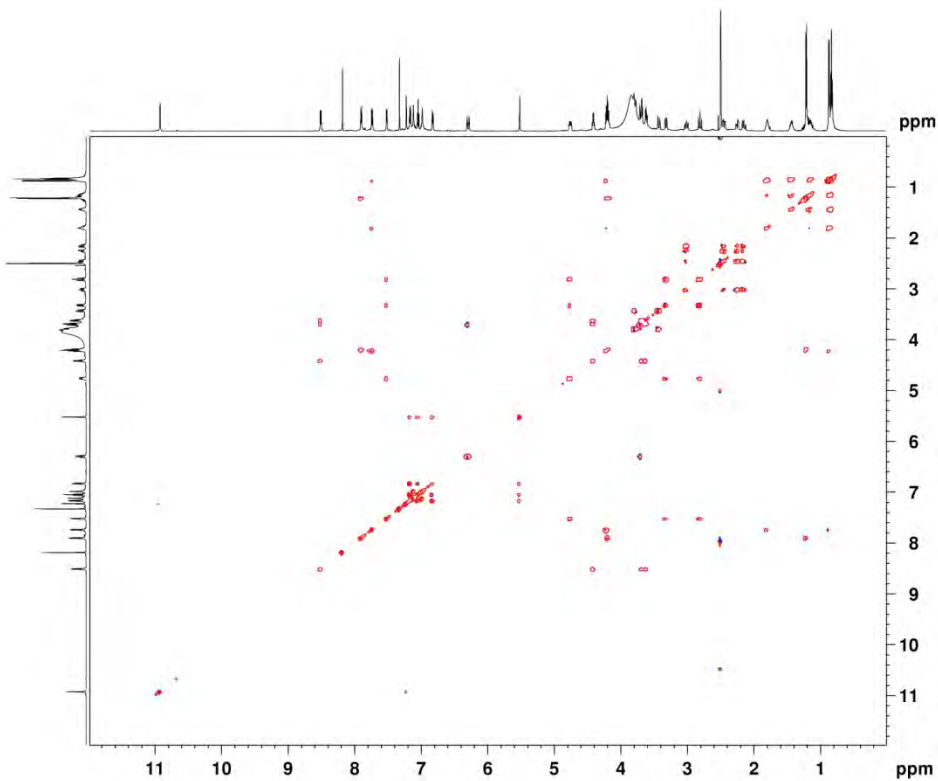

```

Current Data Parameters
NAME      BC-11-222A
EXPNO    8
PROCNO   3

F2 - Acquisition Parameters
Date_    20150318
Time     16:53
INSTRUM  spect
PROBHD   5 mm TBI5
PULPROG  zgpg30
TD        65536
SOLVENT  DMSO
NS        2
DS        4
SWH       7788.362 Hz
FIDRES    3.802514 Hz
AQ        0.1315218 sec
RG         363.5
DM        84.200 usec
DE        6.30 usec
TE        298.2 K
D0         0.0000374 sec
D1         1.0000000 sec
D2         0.0400000 sec
D3         0.0000000 sec
D4         0.0000000 sec
D16       0.0002000 sec
IN0       0.0001284 sec
IC        2

===== CHANNEL F1 =====
NUC1      1H
P1        19.90 usec
P2        23.40 usec
P3        26.48 usec
P4        40.00 usec
P5        80.00 usec
P6        3000.00 usec
P7        2800.00 usec
P8        120.00 dB
P9        -2.00 dB
P10       4.25 dB
P11       0 W
P12       39.8107284 MHz
P13       2.94801258 MHz
SFO1      600.1300935 MHz
SFO2      125.00 MHz
SFO3      Squal00.1000
SFO4      1.000
SFO5      -1456.44 Hz

===== GRADIENT CHANNEL =====
GPMAX1    210.100
GPMAX2    210.100
GPR1      0 %
GPR2      0 %
GPR3      0 %
GPR4      0 %
GPR5      0 %
GPR6      0 %
GPR7      0 %
GPR8      0 %
GPR9      0 %
GPR10     0 %
GPR11     0 %
GPR12     0 %
GPR13     0 %
GPR14     0 %
GPR15     0 %
GPR16     0 %
GPR17     0 %
GPR18     0 %
GPR19     0 %
GPR20     0 %
GPR21     31.00 %
GPR22     11.00 %
GPR23     0 %
GPR24     1000.00 usec

F1 - Acquisition parameters
TD        65536
SFO1      600.1300935 MHz
SFO2      125.0000000 MHz
SFO3      15.211276 Hz
SFO4      32.977 ppm
FMODE     States-2DFT

F2 - Processing parameters
SI        4096
SF        600.1300935 MHz
WDW       QSI
SSB       0
GB        0
PC        1.00

F1 - Processing parameters
SI        4096
SF        600.1300935 MHz
WDW       QSI
SSB       0
GB        0
PC        1.00

```

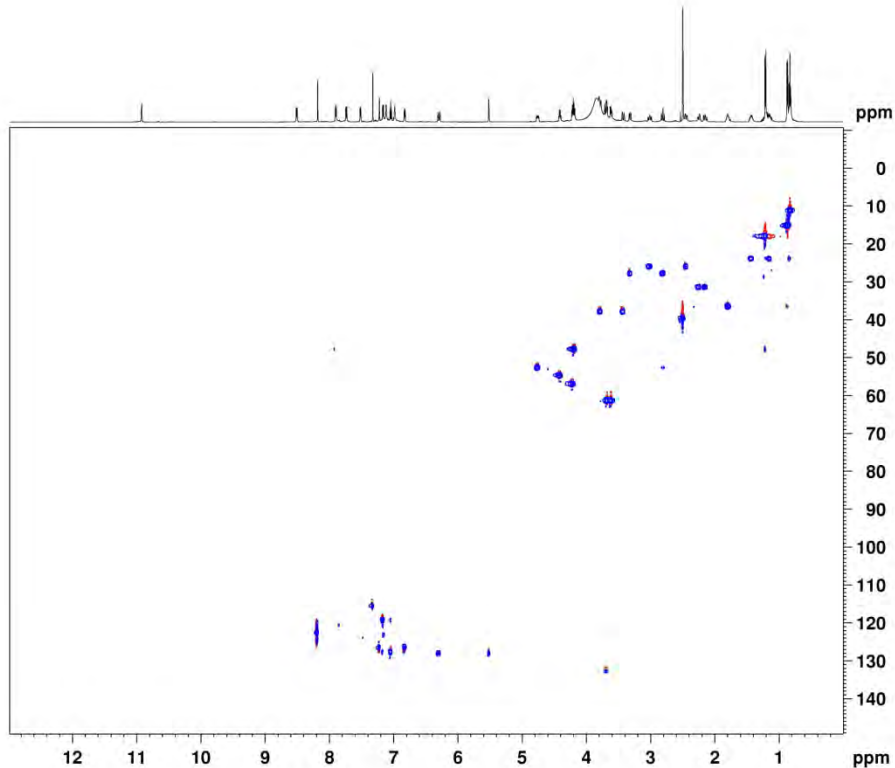

```

Current Data Parameters
NAME: 85-111-222A
EXNO: 1
PROCNO: 1

F1 - Acquisition Parameters
Date_: 2/15/16
Time: 19.15
INSTRUM: spect
PROBHD: 5 mm BBI5
PULPROG: zgpg30
TD: 65536
SOLVENT: benzene-d6
NS: 10
DS: 16
SWH: 7788.162 Hz
FIDRES: 3.802814 Hz
AQ: 0.1317314 sec
RG: 24008
DM: 49.200 usec
DE: 6.00 usec
TE: 297.2 K
CNS322: 145.0000000
CNS323: 7.0000000
D0: 0.000000000 sec
D1: 1.500000000 sec
D2: 0.001480000 sec
D6: 0.071280000 sec
E16: 0.000000000 sec
IND: 0.00001748 sec

----- CHANNEL f1 -----
NUC1: 1H
P1: 10.90 usec
PC: 21.00 usec
PL1: -2.00 dB
PULSE: 90.1107834 M
SFO1: 600.1339000 MHz

----- CHANNEL f2 -----
NUC2: 13C
P2: 15.00 usec
PC2: 15.00 usec
PL2: -2.00 dB
PULSE: 150.55617600 M
SFO2: 150.9156357 MHz

----- GRADIENT CHANNEL -----
GPMAG1: SINE.100
GPMAG2: SINE.100
GPMAG3: SINE.100
GEX1: 0 %
GEX2: 0 %
GEX3: 0 %
GPF1: 0 %
GPTC: 0 %
GPF3: 0 %
GDE1: 50.00 %
GDE2: 30.00 %
GDE3: 40.10 %
P16: 1000.00 usec

F1 - Acquisition Parameters
TD: 65536
SFO1: 150.9156 MHz
FIDRES: 112.007636 Hz
SW: 150.000 ppm
PULPROG: zgpg30

F2 - Processing parameters
SI: 4096
SF: 600.1300115 MHz
WDW: GEM
SSB: 0
LB: 0 Hz
GB: 0
PC: 1.40

F1 - Processing parameters
SI: 4096
SF: 150.9156357 MHz
WDW: EM
SSB: 0 Hz
LB: 0
GB: 0

```

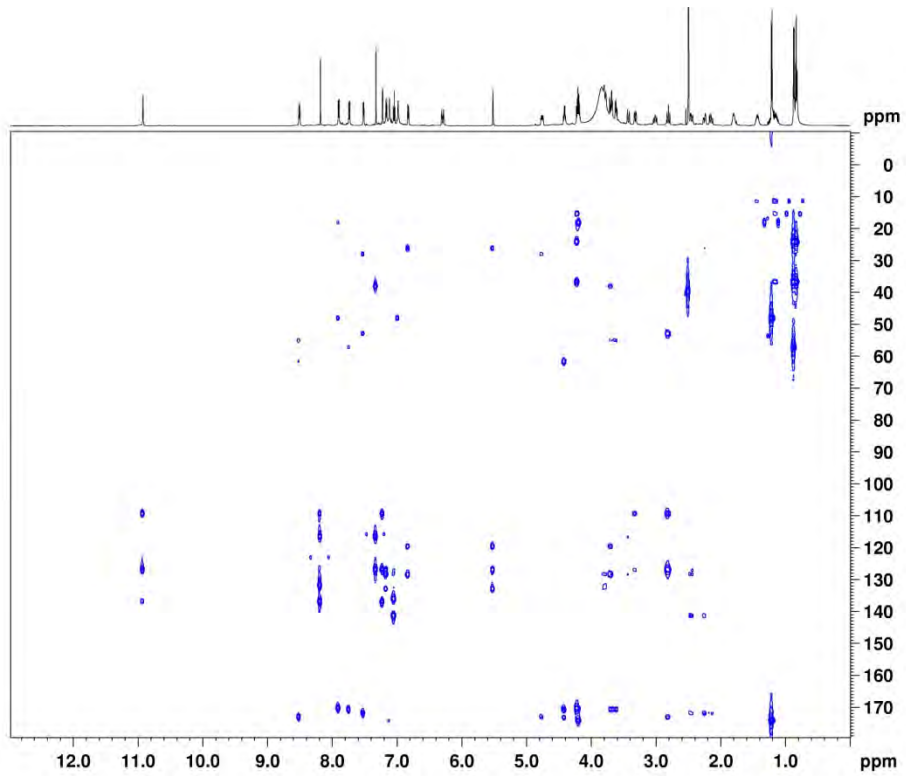

Macrocyclic Product 16b

```

Current Data Parameters
NAME      BC-III-222B1
EXPNO    2
PROCNO   1

F2 - Acquisition Parameters
Date_    20150702
Time     12.08
INSTRUM  av600
PROBHD   5 mm TBI5
PULPROG  zg
TD        65536
SOLVENT  DMSO
NS        17
DS        0
SWH       12376.237 Hz
FIDRES    0.188846 Hz
AQ        2.6477044 sec
RG        45.3
DW        40.400 usec
DE        6.50 usec
TE        298.0 K
D1        2.00000000 sec
TD0       1
    
```

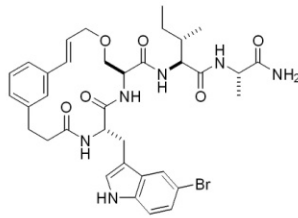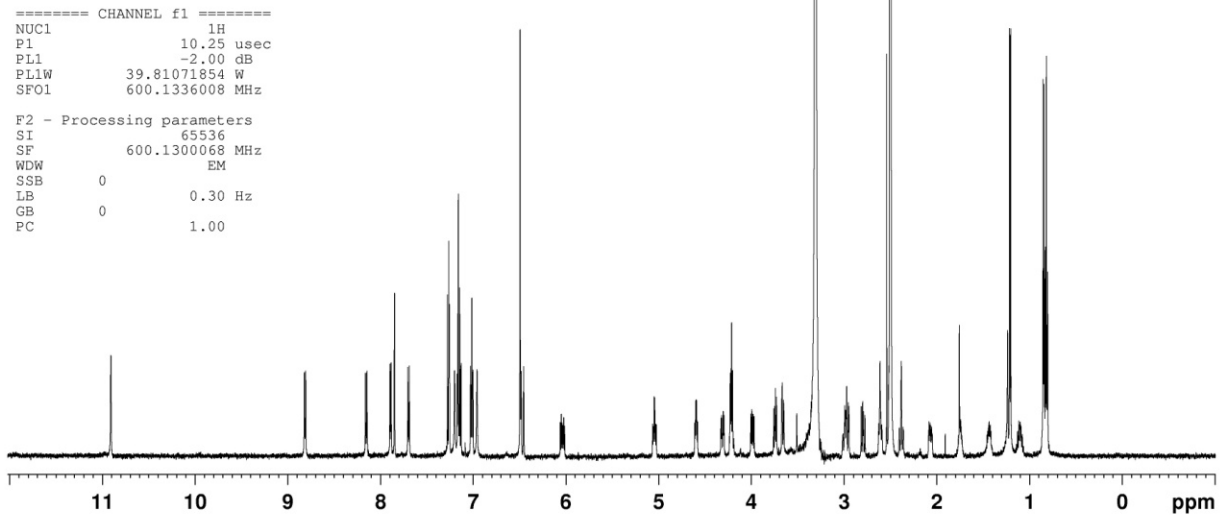

```

Current Data Parameters
NAME      BC-III-222B1
EXPNO    6
PROCNO   1

F2 - Acquisition Parameters
Date_    20150702
Time     12.10
INSTRUM  av600
PROBHD   5 mm TBI5
PULPROG  cosygppprgf
TD        2048
SOLVENT  DMSO
NS        4
DS        16
SWH       7183.908 Hz
FIDRES    3.507768 Hz
AQ        0.1425908 sec
RG        456.1
DW        68.600 usec
DE        6.50 usec
TE        298.0 K
D0        0.00000300 sec
D1        1.00000000 sec
D11       0.03000000 sec
D12       0.00002000 sec
D16       0.00020000 sec
TNO       0.00013920 sec
    
```

===== CHANNEL f1 =====

```

NUC1      1H
P0        8.00 usec
P1        10.25 usec
PL1       -2.00 dB
PL19      120.00 dB
PL1W      39.81071854 W
PL19W     0 W
SF01      600.1336008 MHz
    
```

===== GRADIENT CHANNEL =====

```

GPHAM1    SINE.100
GPX1      0 %
GPF1      0 %
GFE1      10.00 %
P16       1000.00 usec
    
```

```

F1 - Acquisition parameters
TD         512
SF01      600.1336 MHz
FIDRES    14.031077 Hz
SW        11.971 ppm
F-MODE    QF
    
```

```

F2 - Processing parameters
SI         4096
SF         600.1300052 MHz
WDW        QSINE
SSB        1.5
LB         0 Hz
GB         0
PC         1.00
    
```

```

F1 - Processing parameters
SI         4096
MC2        QF
SF         600.1300052 MHz
WDW        QSINE
SSB        1.5
LB         0 Hz
GB         0
    
```

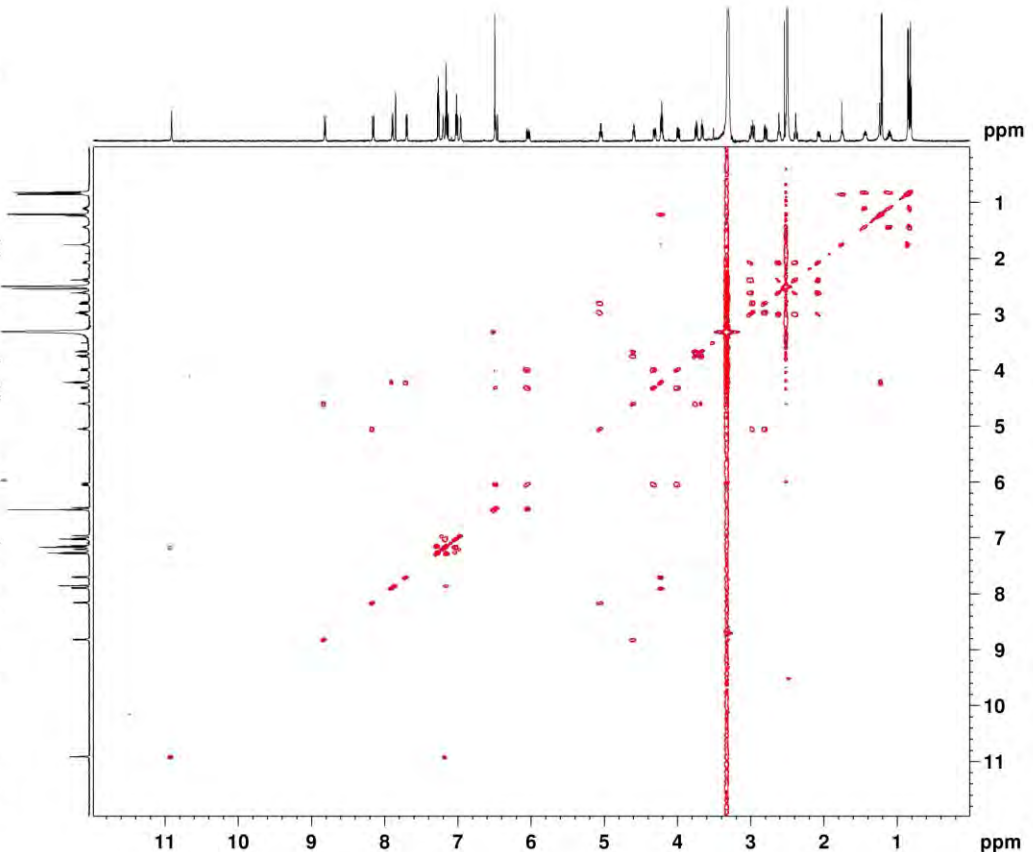



```

Current Data Parameters
NAME      SC-111-22281
EXPNO    7
PROCNO    1

F2 - Acquisition Parameters
Date_    20150702
Time     12.42
INSTRUM  av600
PROBHD   5 mm TBS1
PULPROG  alvelespph
ID       2048
SOLVENT  DMSO
NS       4
DS       7788.362 Hz
FIDRES   3.802814 Hz
AQ       0.1315316 sec
RG       1625.5
DW       64.200 usec
DE       6.50 usec
TE       298.0 K
DD       0.0003747 sec
D1       1.00000000 sec
D9       0.06690000 sec
D12      0.00002000 sec
D16      0.00020000 sec
LNO      0.00012840 sec
LI       24

===== CHANNEL f1 =====
NUC1      1H
P1       16.25 usec
P2       50 usec
P3       26.68 usec
P4       40.00 usec
P5       80.00 usec
P6       2000.00 usec
P7       2500.00 usec
P8       120.00 dB
P9       -2.00 dB
P10      9.83 dB
PL1W     0 W
PL1XW    39.81072854 W
PL2W     2.61216140 W
SFO1     600.132908 MHz
SFO2     100.00 MHz
SFO3     equal0.1000
SFO4     1.000
RFOFFS1  -1456.44 Hz

===== GRADIENT CHANNEL =====
GPNAM0   SINE.100
GPNAM2   SINE.100
GFX1     0 %
GFX2     0 %
GFT1     0 %
GFT2     0 %
GVS1     0 %
GVS2     0 %
GVS3     0 %
GVS4     0 %
GVS5     0 %
GVS6     0 %
GVS7     0 %
GVS8     0 %
GVS9     0 %
GVS10    0 %
GVS11    0 %
GVS12    0 %
GVS13    0 %
GVS14    0 %
GVS15    0 %
GVS16    0 %
GVS17    0 %
GVS18    0 %
GVS19    0 %
GVS20    0 %
GVS21    0 %
GVS22    0 %
GVS23    0 %
GVS24    0 %
GVS25    0 %
GVS26    0 %
GVS27    0 %
GVS28    0 %
GVS29    0 %
GVS30    0 %
GVS31    0 %
GVS32    0 %
GVS33    0 %
GVS34    0 %
GVS35    0 %
GVS36    0 %
GVS37    0 %
GVS38    0 %
GVS39    0 %
GVS40    0 %
GVS41    0 %
GVS42    0 %
GVS43    0 %
GVS44    0 %
GVS45    0 %
GVS46    0 %
GVS47    0 %
GVS48    0 %
GVS49    0 %
GVS50    0 %
GVS51    0 %
GVS52    0 %
GVS53    0 %
GVS54    0 %
GVS55    0 %
GVS56    0 %
GVS57    0 %
GVS58    0 %
GVS59    0 %
GVS60    0 %
GVS61    0 %
GVS62    0 %
GVS63    0 %
GVS64    0 %
GVS65    0 %
GVS66    0 %
GVS67    0 %
GVS68    0 %
GVS69    0 %
GVS70    0 %
GVS71    0 %
GVS72    0 %
GVS73    0 %
GVS74    0 %
GVS75    0 %
GVS76    0 %
GVS77    0 %
GVS78    0 %
GVS79    0 %
GVS80    0 %
GVS81    0 %
GVS82    0 %
GVS83    0 %
GVS84    0 %
GVS85    0 %
GVS86    0 %
GVS87    0 %
GVS88    0 %
GVS89    0 %
GVS90    0 %
GVS91    0 %
GVS92    0 %
GVS93    0 %
GVS94    0 %
GVS95    0 %
GVS96    0 %
GVS97    0 %
GVS98    0 %
GVS99    0 %
GVS100   0 %

F1 - Acquisition parameters
SI       512
SF       600.132908 MHz
FIDRES   15.211276 Hz
SW       12.977 ppm
F2MODE   States-2DPI

F2 - Processing parameters
SI       4096
SF       600.132908 MHz
WDW      EM
SSB      2
LB       0 Hz
GB       0
PC       1.00

F1 - Processing parameters
SI       4096
SF       600.132908 MHz
WDW      EM
SSB      2
LB       0 Hz
GB       0
PC       1.00

```

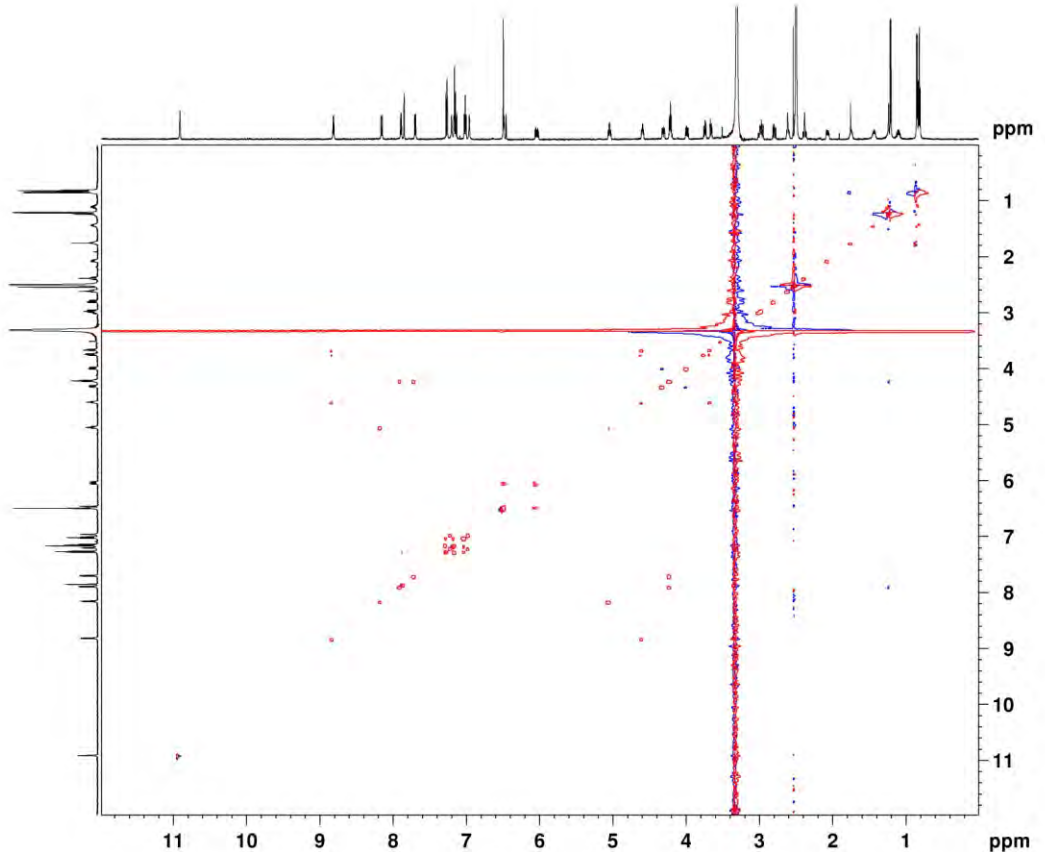

```

Current Data Parameters
NAME      SC-111-2229
EXPNO    8
PROCNO    1

F2 - Acquisition Parameters
Date_    20150629
Time     20.16
INSTRUM  av600
PROBHD   5 mm TBS1
PULPROG  hsqptprsq4p
ID       2048
SOLVENT  DMSO
NS       16
DS       7788.162 Hz
FIDRES   3.802814 Hz
AQ       0.1315316 sec
RG       1625.5
DW       64.200 usec
DE       6.50 usec
TE       298.0 K
DD       140.000000 sec
D1       0.00000000 sec
D3       0.00172414 sec
D4       0.02000000 sec
D11      0.00000000 sec
D16      0.00020000 sec
D18      0.00000000 sec
LNO      0.00000000 sec
LI       24

===== CHANNEL f1 =====
NUC1      1H
P1       12.70 usec
P2       25.50 usec
P3       1000.00 usec
P4       1000.00 usec
P5       80.00 usec
P6       120.00 dB
P7       -2.00 dB
P8       9.83 dB
PL1W     0 W
PL1XW    130.9417041 W
PL2W     33.9440981 W
SFO1     600.132908 MHz
SFO2     100.00 MHz
SFO3     equal0.1.1.1.1
SFO4     0.580
RFOFFS1  0 Hz

===== GRADIENT CHANNEL =====
GPNAM0   SINE.100
GPNAM2   SINE.100
GFX1     0 %
GFX2     0 %
GFT1     0 %
GFT2     0 %
GVS1     0 %
GVS2     0 %
GVS3     0 %
GVS4     0 %
GVS5     0 %
GVS6     0 %
GVS7     0 %
GVS8     0 %
GVS9     0 %
GVS10    0 %
GVS11    0 %
GVS12    0 %
GVS13    0 %
GVS14    0 %
GVS15    0 %
GVS16    0 %
GVS17    0 %
GVS18    0 %
GVS19    0 %
GVS20    0 %
GVS21    0 %
GVS22    0 %
GVS23    0 %
GVS24    0 %
GVS25    0 %
GVS26    0 %
GVS27    0 %
GVS28    0 %
GVS29    0 %
GVS30    0 %
GVS31    0 %
GVS32    0 %
GVS33    0 %
GVS34    0 %
GVS35    0 %
GVS36    0 %
GVS37    0 %
GVS38    0 %
GVS39    0 %
GVS40    0 %
GVS41    0 %
GVS42    0 %
GVS43    0 %
GVS44    0 %
GVS45    0 %
GVS46    0 %
GVS47    0 %
GVS48    0 %
GVS49    0 %
GVS50    0 %
GVS51    0 %
GVS52    0 %
GVS53    0 %
GVS54    0 %
GVS55    0 %
GVS56    0 %
GVS57    0 %
GVS58    0 %
GVS59    0 %
GVS60    0 %
GVS61    0 %
GVS62    0 %
GVS63    0 %
GVS64    0 %
GVS65    0 %
GVS66    0 %
GVS67    0 %
GVS68    0 %
GVS69    0 %
GVS70    0 %
GVS71    0 %
GVS72    0 %
GVS73    0 %
GVS74    0 %
GVS75    0 %
GVS76    0 %
GVS77    0 %
GVS78    0 %
GVS79    0 %
GVS80    0 %
GVS81    0 %
GVS82    0 %
GVS83    0 %
GVS84    0 %
GVS85    0 %
GVS86    0 %
GVS87    0 %
GVS88    0 %
GVS89    0 %
GVS90    0 %
GVS91    0 %
GVS92    0 %
GVS93    0 %
GVS94    0 %
GVS95    0 %
GVS96    0 %
GVS97    0 %
GVS98    0 %
GVS99    0 %
GVS100   0 %

F1 - Acquisition parameters
SI       512
SF       600.132908 MHz
FIDRES   84.326884 Hz
SW       160.000 ppm
F2MODE   None-Acquired

F1 - Processing parameters
SI       4096
SF       600.132908 MHz
WDW      EM
SSB      2
LB       0 Hz
GB       0
PC       1.40

F1 - Processing parameters
SI       4096
SF       600.132908 MHz
WDW      EM
SSB      2
LB       0 Hz
GB       0
PC       1.40

```

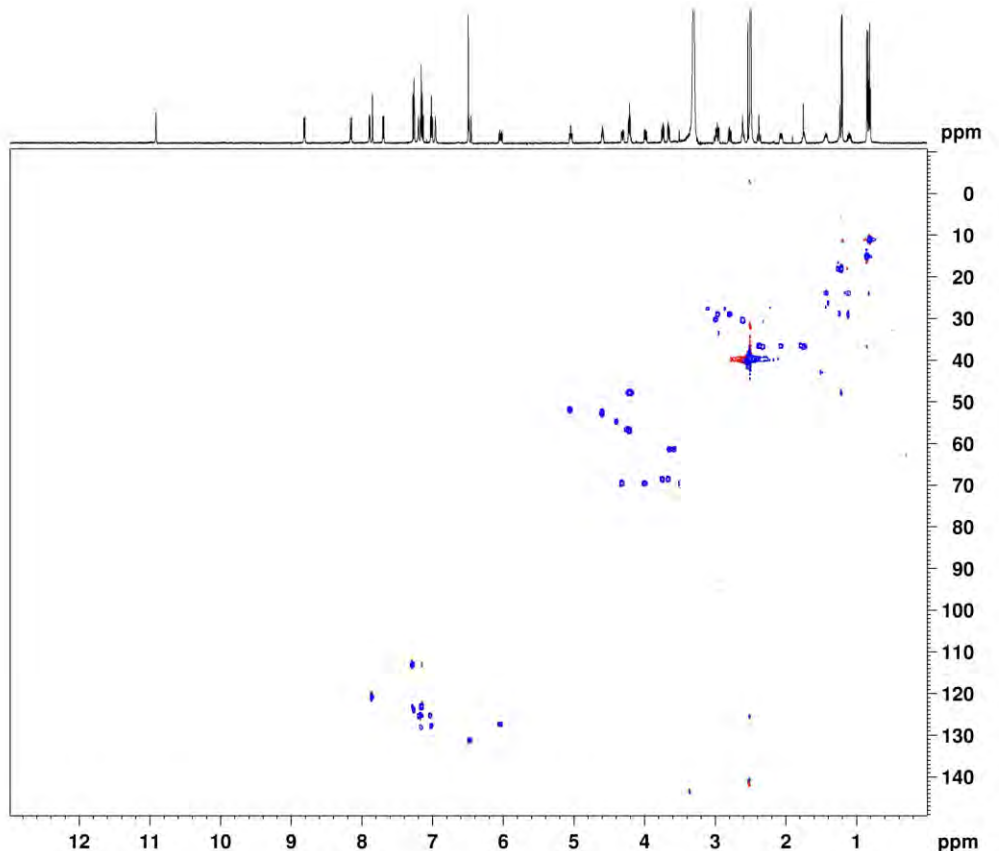

```

Current Data Parameters
NAME: 80-111-2228
EXENO: 9
PROCNO: 1

F2 - Acquisition Parameters
Date_: 20150623
Time: 22.33
INSTRUM: av600
PROBHD: 5 mm TBI1
PULPROG: hmcgpprpdaf
TD: 2048
SOLVENT: DMSO
NS: 30
DS: 16
SWH: 7786.162 Hz
FIDRES: 3.802814 Hz
AQ: 0.1315316 sec
RG: 24008
RM: 64.200 umsc
DE: 6.00 umsc
TE: 297.4 K
CNU22: 145.000000
CNU13: 7.000000
DO: 0.0000000 sec
D1: 1.50000000 sec
D2: 0.00198000 sec
D6: 0.07142857 sec
D16: 0.00020000 sec
TMO: 0.00031455 sec

----- CHANNEL f1 -----
NUC1: 1H
P1: 12.75 umsc
PC: 25.50 umsc
PL1: 2.00 dB
PL12: 38.81078344 Hz
SFO1: 600.1339008 MHz

----- CHANNEL f2 -----
NUC2: 13C
P2: 19.20 umsc
PL2: -3.00 dB
PL12: 150.8817065 Hz
SFO2: 150.8146857 MHz

----- GRADIENT CHANNEL -----
GPAAL1: SINE.100
GPAAL2: SINE.100
GPAAL3: SINE.100
GPX1: 0 %
GPX2: 0 %
GPX3: 0 %
GPI1: 0 %
GPI2: 0 %
GPI3: 0 %
GPI4: 50.00 %
GSE1: 30.00 %
GSE2: 40.10 %
GSE3: 1000.00 umsc
P16: 1000.00 umsc

F1 - Acquisition parameters
TD: 256
SFO1: 150.8156 MHz
FIDRES: 112.007638 Hz
SW: 190.000 ppm
PROCNO: 9

F2 - Processing parameters
SI: 4096
SF: 600.1300100 MHz
RGW: Q5120
SSB: 0
LA: 0 Hz
GB: 0
PC: 1.40

F1 - Processing parameters
SI: 4096
SF: 150.8028849 MHz
RGW: 2
SSB: 0
LA: 0
GB: 0

```

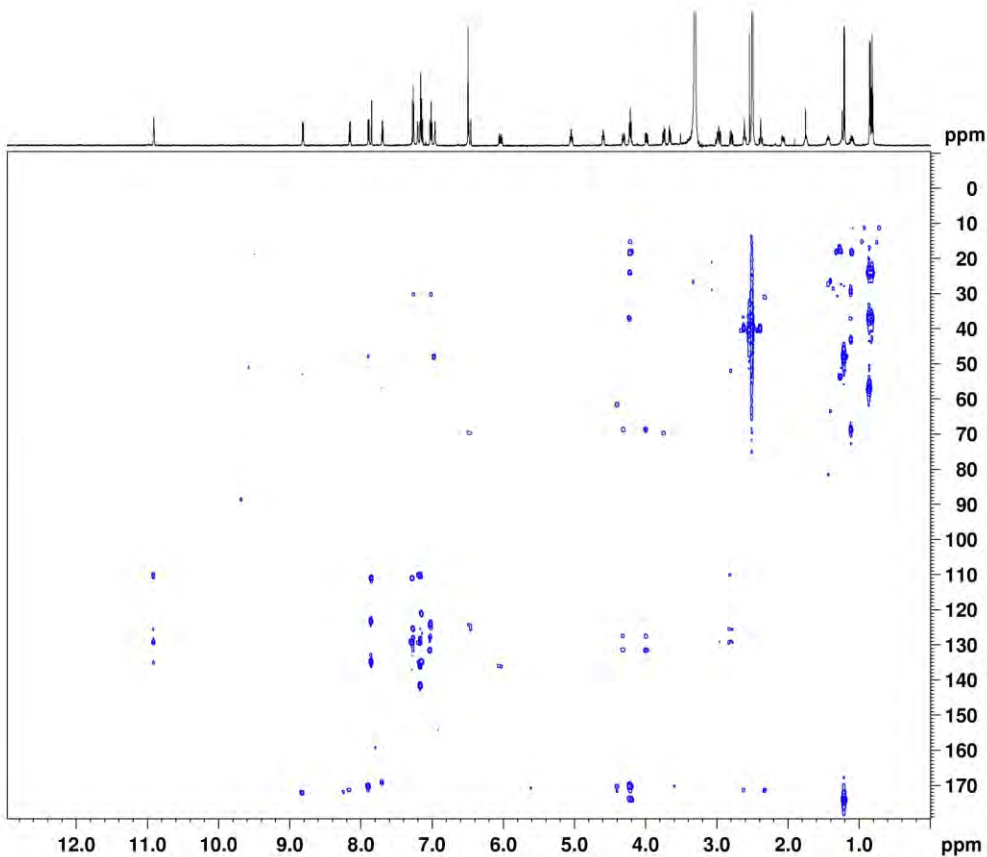

Macrocyclic Product 16c

```

Current Data Parameters
NAME      BC-III-222C2
EXPNO    3
PROCNO   1

F2 - Acquisition Parameters
Date_    20150527
Time     18.46
INSTRUM av600
PROBHD   5 mm TBI5
PULPROG  zgpr
TD       65536
SOLVENT  DMSO
NS       16
DS       0
SWH      12376.237 Hz
FIDRES   0.188846 Hz
AQ       2.6477044 sec
RG       22.6
DW       40.400 usec
DE       6.50 usec
TE       298.0 K
D1       2.0000000 sec
D12      0.00002000 sec
TD0      1
    
```

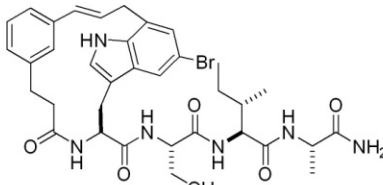

```

----- CHANNEL f1 -----
NUC1     1H
P1       10.57 usec
PL1      -2.00 dB
PL19     51.36 dB
PL1W     39.81071854 W
PL9W     0.00018365 W
SF01     600.1319984 MHz

F2 - Processing parameters
SI       65536
SF       600.1300070 MHz
WDW      EM
SSB      0
LB       0.30 Hz
GB       0
PC       1.00
    
```

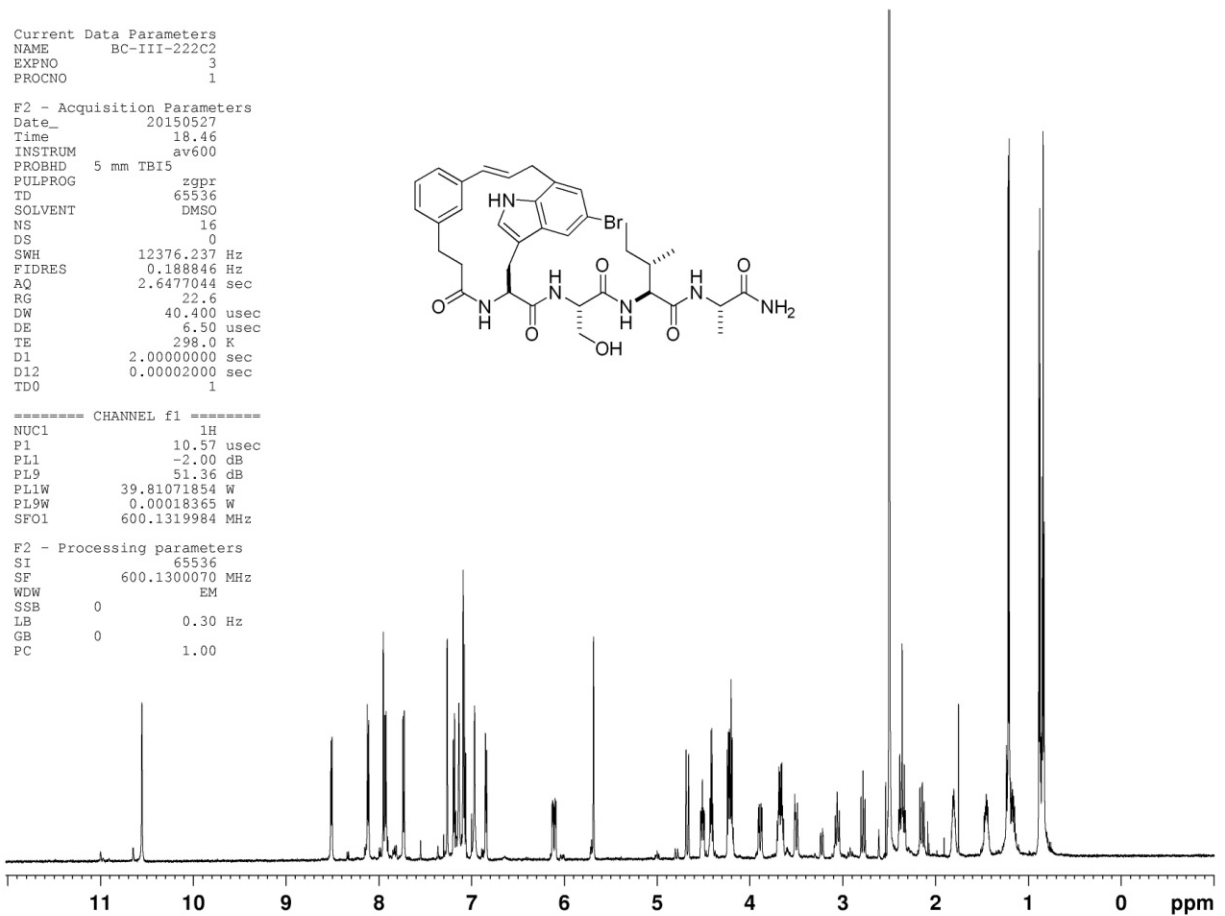

```

Current Data Parameters
NAME      BC-III-222C2
EXPNO    6
PROCNO   1

F2 - Acquisition Parameters
Date_    20150527
Time     18.51
INSTRUM av600
PROBHD   5 mm TBI5
PULPROG  cosygpprgf
TD       2048
SOLVENT  DMSO
NS       2
DS       16
SWH      7183.908 Hz
FIDRES   3.507768 Hz
AQ       0.1425908 sec
RG       456.1
DW       65.600 usec
DE       6.50 usec
TE       298.0 K
D0       0.00000300 sec
D1       1.00000000 sec
D11      0.83000000 sec
D12      0.00002000 sec
D16      0.00020000 sec
IN0      0.00013920 sec
    
```

```

----- CHANNEL f1 -----
NUC1     1H
P0       8.00 usec
P1       10.57 usec
PL1      -2.00 dB
PL19     120.00 dB
PL1W     39.81071854 W
PL9W     0 W
SF01     600.1336008 MHz

----- GRADIENT CHANNEL -----
GPHAM1   SINE.100
GPX1     0 %
GPY1     0 %
GPZ1     10.00 %
P16      1000.00 usec

F1 - Acquisition parameters
TD       512
SF01     600.1336 MHz
FIDRES   14.031077 Hz
SW       11.971 ppm
F2MODE   QF

F2 - Processing parameters
SI       4096
SF       600.1300065 MHz
WDW      QSINE
SSB      1.5
LB       0 Hz
GB       0
PC       1.00

F1 - Processing parameters
SI       4096
MC2      QF
SF       600.1300080 MHz
WDW      SSB
SSB      0 Hz
LB       0
GB       0
    
```

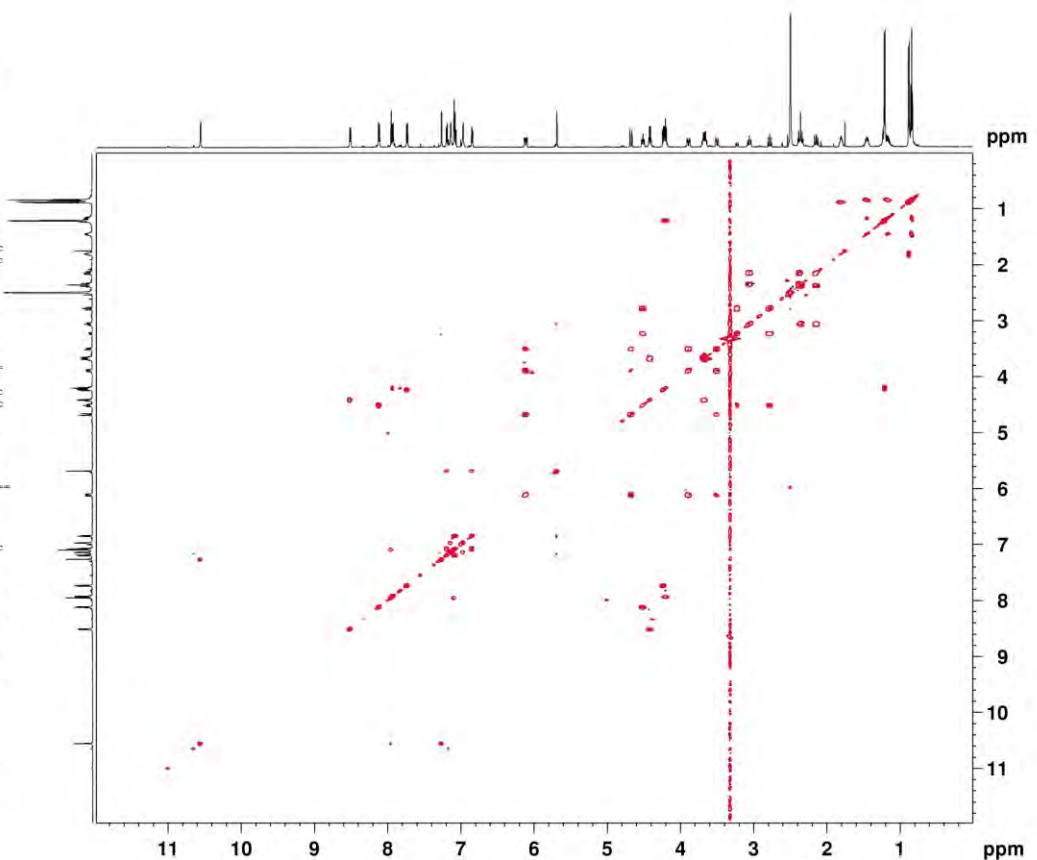

```

Current Data Parameters
NAME: BC-III-222C2
EXPNO: 3
PROCNO: 1

F2 - Acquisition Parameters
Date_ 20150227
Time 19.12
INSTRUM 5 mm TR15
PROBHD 5mm TR15
PULPROG mlevupgpp
TD 2048
SOLVENT DMSO
NS 2
DS 16
SWH 7788.162 Hz
FIDRES 0.802814 Hz
AQ 0.1315316 sec
RG 1625.5
DM 64.200 usec
DE 6.50 usec
TE 298.2 K
D0 0.0003745 sec
D1 1.0000000 sec
D2 0.0400000 sec
D3 0.0002000 sec
D4 0.0002000 sec
D5 0.0002000 sec
D6 0.0002000 sec
D7 0.0002000 sec
D8 0.0002000 sec
D9 0.0002000 sec
D10 0.0002000 sec
D11 0.0002000 sec
D12 0.0002000 sec
D13 0.0002000 sec
D14 0.0002000 sec
D15 0.0002000 sec
D16 0.0002000 sec
D17 0.0002000 sec
D18 0.0002000 sec
D19 0.0002000 sec
D20 0.0002000 sec
D21 0.0002000 sec
D22 0.0002000 sec
D23 0.0002000 sec
D24 0.0002000 sec
D25 0.0002000 sec
D26 0.0002000 sec
D27 0.0002000 sec
D28 0.0002000 sec
D29 0.0002000 sec
D30 0.0002000 sec
D31 0.0002000 sec
D32 0.0002000 sec
D33 0.0002000 sec
D34 0.0002000 sec
D35 0.0002000 sec
D36 0.0002000 sec
D37 0.0002000 sec
D38 0.0002000 sec
D39 0.0002000 sec
D40 0.0002000 sec
D41 0.0002000 sec
D42 0.0002000 sec
D43 0.0002000 sec
D44 0.0002000 sec
D45 0.0002000 sec
D46 0.0002000 sec
D47 0.0002000 sec
D48 0.0002000 sec
D49 0.0002000 sec
D50 0.0002000 sec
D51 0.0002000 sec
D52 0.0002000 sec
D53 0.0002000 sec
D54 0.0002000 sec
D55 0.0002000 sec
D56 0.0002000 sec
D57 0.0002000 sec
D58 0.0002000 sec
D59 0.0002000 sec
D60 0.0002000 sec
D61 0.0002000 sec
D62 0.0002000 sec
D63 0.0002000 sec
D64 0.0002000 sec
D65 0.0002000 sec
D66 0.0002000 sec
D67 0.0002000 sec
D68 0.0002000 sec
D69 0.0002000 sec
D70 0.0002000 sec
D71 0.0002000 sec
D72 0.0002000 sec
D73 0.0002000 sec
D74 0.0002000 sec
D75 0.0002000 sec
D76 0.0002000 sec
D77 0.0002000 sec
D78 0.0002000 sec
D79 0.0002000 sec
D80 0.0002000 sec
D81 0.0002000 sec
D82 0.0002000 sec
D83 0.0002000 sec
D84 0.0002000 sec
D85 0.0002000 sec
D86 0.0002000 sec
D87 0.0002000 sec
D88 0.0002000 sec
D89 0.0002000 sec
D90 0.0002000 sec
D91 0.0002000 sec
D92 0.0002000 sec
D93 0.0002000 sec
D94 0.0002000 sec
D95 0.0002000 sec
D96 0.0002000 sec
D97 0.0002000 sec
D98 0.0002000 sec
D99 0.0002000 sec
D100 0.0002000 sec

===== CHANNEL F1 =====
NUC1 13
P1 10.57 usec
P2 21.14 usec
P3 26.68 usec
P4 40.00 usec
P5 80.00 usec
P6 3500.00 usec
P7 2500.00 usec
P8 120.00 dB
P9 -2.00 dB
P10 9.36 dB
P11 0 W
P12 39.81071954 W
P13 2.77971292 W
SFO1 600.133908 MHz
SFO2 120.00 dB
SFO3 1.000
SFOFFS1 -1456.44 Hz

===== GRADIENT CHANNEL =====
GRNAM1 SINE.100
GRNAM2 SINE.100
GRX1 0 %
GRY1 0 %
GRZ1 0 %
GR21 31.00 %
GR22 11.00 %
GR23 1000.00 usec
F16 1000.00 usec

F1 - Acquisition parameters
ID 212
SFO1 600.1339 MHz
FIDRES 15.21274 Hz
SW 12.377 ppm
FRMODE States-2DPI

F2 - Processing parameters
SI 4096
SF 600.133908 MHz
WDW 0.5LINE
SSB 2
LB 0 Hz
GB 0
PC 1.00

F1 - Processing parameters
SI 4096
MCX States-TPPI
SF 600.133908 MHz
WDW 0.5LINE
SSB 2
LB 0 Hz
GB 0
PC 1.00

```

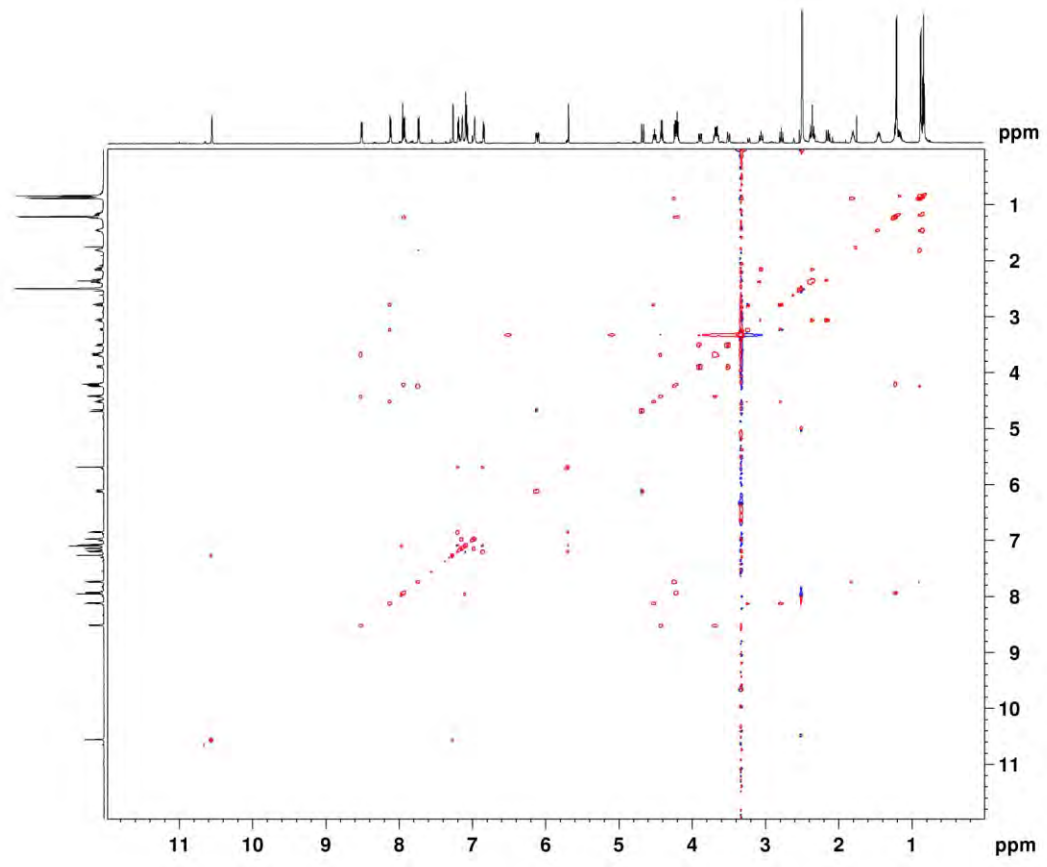

```

Current Data Parameters
NAME: BC-III-222C2
EXPNO: 2
PROCNO: 1

F2 - Acquisition Parameters
Date_ 20150227
Time 19.12
INSTRUM 5 mm TR15
PROBHD 5mm TR15
PULPROG mlevupgpp
TD 2048
SOLVENT DMSO
NS 2
DS 16
SWH 7788.162 Hz
FIDRES 0.802814 Hz
AQ 0.1315316 sec
RG 1625.5
DM 64.200 usec
DE 6.50 usec
TE 298.2 K
D0 0.0003745 sec
D1 1.0000000 sec
D2 0.0400000 sec
D3 0.0002000 sec
D4 0.0002000 sec
D5 0.0002000 sec
D6 0.0002000 sec
D7 0.0002000 sec
D8 0.0002000 sec
D9 0.0002000 sec
D10 0.0002000 sec
D11 0.0002000 sec
D12 0.0002000 sec
D13 0.0002000 sec
D14 0.0002000 sec
D15 0.0002000 sec
D16 0.0002000 sec
D17 0.0002000 sec
D18 0.0002000 sec
D19 0.0002000 sec
D20 0.0002000 sec
D21 0.0002000 sec
D22 0.0002000 sec
D23 0.0002000 sec
D24 0.0002000 sec
D25 0.0002000 sec
D26 0.0002000 sec
D27 0.0002000 sec
D28 0.0002000 sec
D29 0.0002000 sec
D30 0.0002000 sec
D31 0.0002000 sec
D32 0.0002000 sec
D33 0.0002000 sec
D34 0.0002000 sec
D35 0.0002000 sec
D36 0.0002000 sec
D37 0.0002000 sec
D38 0.0002000 sec
D39 0.0002000 sec
D40 0.0002000 sec
D41 0.0002000 sec
D42 0.0002000 sec
D43 0.0002000 sec
D44 0.0002000 sec
D45 0.0002000 sec
D46 0.0002000 sec
D47 0.0002000 sec
D48 0.0002000 sec
D49 0.0002000 sec
D50 0.0002000 sec
D51 0.0002000 sec
D52 0.0002000 sec
D53 0.0002000 sec
D54 0.0002000 sec
D55 0.0002000 sec
D56 0.0002000 sec
D57 0.0002000 sec
D58 0.0002000 sec
D59 0.0002000 sec
D60 0.0002000 sec
D61 0.0002000 sec
D62 0.0002000 sec
D63 0.0002000 sec
D64 0.0002000 sec
D65 0.0002000 sec
D66 0.0002000 sec
D67 0.0002000 sec
D68 0.0002000 sec
D69 0.0002000 sec
D70 0.0002000 sec
D71 0.0002000 sec
D72 0.0002000 sec
D73 0.0002000 sec
D74 0.0002000 sec
D75 0.0002000 sec
D76 0.0002000 sec
D77 0.0002000 sec
D78 0.0002000 sec
D79 0.0002000 sec
D80 0.0002000 sec
D81 0.0002000 sec
D82 0.0002000 sec
D83 0.0002000 sec
D84 0.0002000 sec
D85 0.0002000 sec
D86 0.0002000 sec
D87 0.0002000 sec
D88 0.0002000 sec
D89 0.0002000 sec
D90 0.0002000 sec
D91 0.0002000 sec
D92 0.0002000 sec
D93 0.0002000 sec
D94 0.0002000 sec
D95 0.0002000 sec
D96 0.0002000 sec
D97 0.0002000 sec
D98 0.0002000 sec
D99 0.0002000 sec
D100 0.0002000 sec

===== CHANNEL F1 =====
NUC1 13
P1 10.57 usec
P2 21.14 usec
P3 26.68 usec
P4 40.00 usec
P5 80.00 usec
P6 3500.00 usec
P7 2500.00 usec
P8 120.00 dB
P9 -2.00 dB
P10 9.36 dB
P11 0 W
P12 39.81071954 W
P13 2.77971292 W
SFO1 600.133908 MHz
SFO2 120.00 dB
SFO3 1.000
SFOFFS1 -1456.44 Hz

===== CHANNEL F2 =====
GRNAM1 SINE.100
GRNAM2 SINE.100
GRX1 0 %
GRY1 0 %
GRZ1 0 %
GR21 88.00 %
GR22 28.10 %
GR23 1000.00 usec
F16 1000.00 usec

F1 - Acquisition parameters
ID 214
SFO1 150.8234 MHz
FIDRES 84.229854 Hz
SW 150.000 ppm
FRMODE Echo-Artifact

F2 - Processing parameters
SI 4096
SF 600.133908 MHz
WDW 0.5LINE
SSB 0
LB 0 Hz
GB 0
PC 1.00

F1 - Processing parameters
SI 4096
MCX Echo-Artifact
SF 150.8234 MHz
WDW 0.5LINE
SSB 0
LB 0 Hz
GB 0
PC 1.00

```

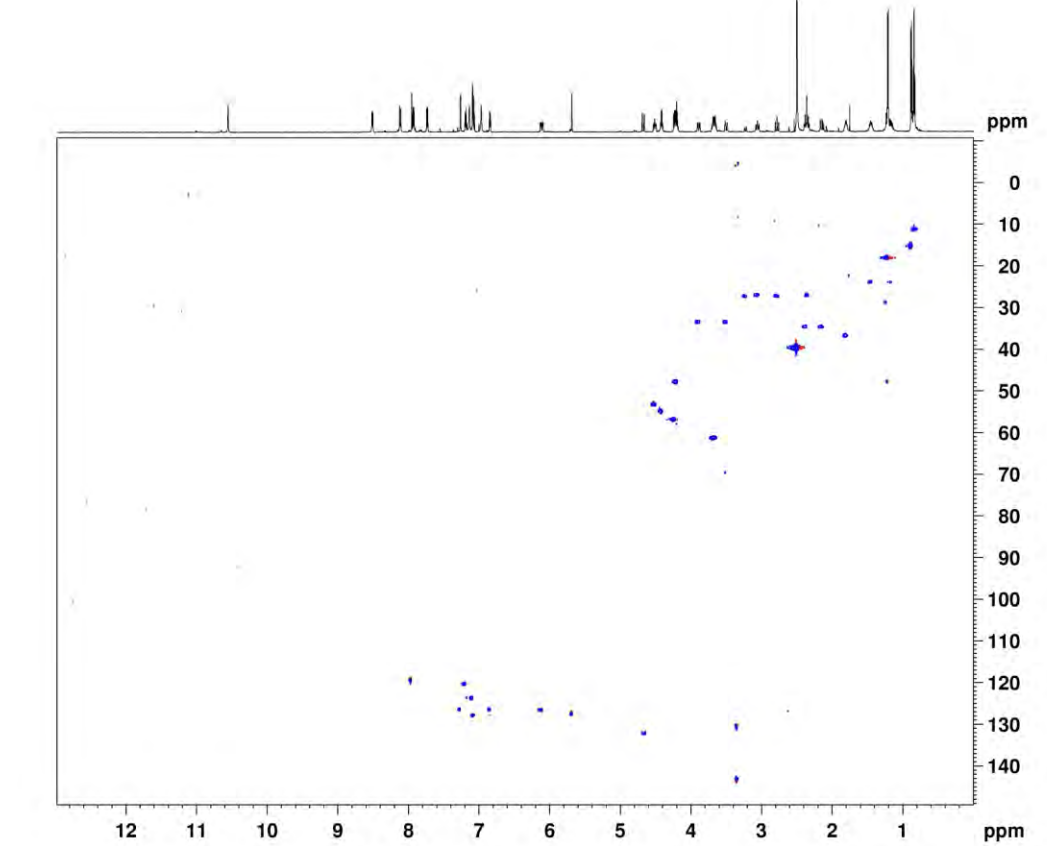

```

Current Data Parameters
NAME: HC-111-220C2
EXPNO: 9
PROCNO: 1

F2 - Acquisition Parameters
Date_: 20150527
Time: 21.07
INSTRUM: spect
PROBHD: 5 mm TRIS
PULPROG: hmcgpgpmdaf
TD: 2048
SOLVENT: DMSO
NS: 30
DS: 16
SWH: 7788.162 Hz
FIDRES: 5.802614 Hz
AQ: 0.1315316 sec
RG: 24000
DM: 84.200 usec
DE: 6.00 usec
TE: 297.2 K
CNR12: 145.0000000
CNR13: 1.0000000
DD: 0.0000000 sec
D1: 1.0000000 sec
D2: 0.0034828 sec
D6: 0.0142897 sec
d16: 0.0002000 sec
LNO: 0.00001742 sec

----- CHANNEL f1 -----
NUC1: 1H
P1: 10.07 usec
P2: 21.14 usec
PL1: -2.00 dB
PL12: 99.81071854 W
SFO1: 600.1339008 MHz

----- CHANNEL f2 -----
NUC2: 13C
P3: 19.50 usec
P12: -3.00 dB
PL12W: 150.91561965 W
SFO2: 150.9156357 MHz

----- GRADIENT CHANNEL -----
GPMAX1: SINE.100
GPMAX2: SINE.100
GPNAMS: SINE.100
GPX1: 0 %
GPX2: 0 %
GPX3: 0 %
GPI1: 0 %
GPY2: 0 %
GPY3: 0 %
GPR1: 50.00 %
GPR2: 30.00 %
GPR3: 40.10 %
PT6: 1000.00 usec

F1 - Acquisition parameters
TS: 206
SFO1: 150.9156 MHz
FIDRES: 112.007638 Hz
DM: 190.000 ppm
P2MODE: QP

F2 - Processing parameters
SI: 4096
SF: 600.1330058 MHz
WDW: Q2SINE
SSB: 0
LB: 0 Hz
GB: 0
PC: 1.40

F1 - Processing parameters
SI: 4096
MC2: QP
SF: 150.9156357 MHz
WDW: Q2SINE
SSB: 0
LB: 0 Hz
GB: 0

```

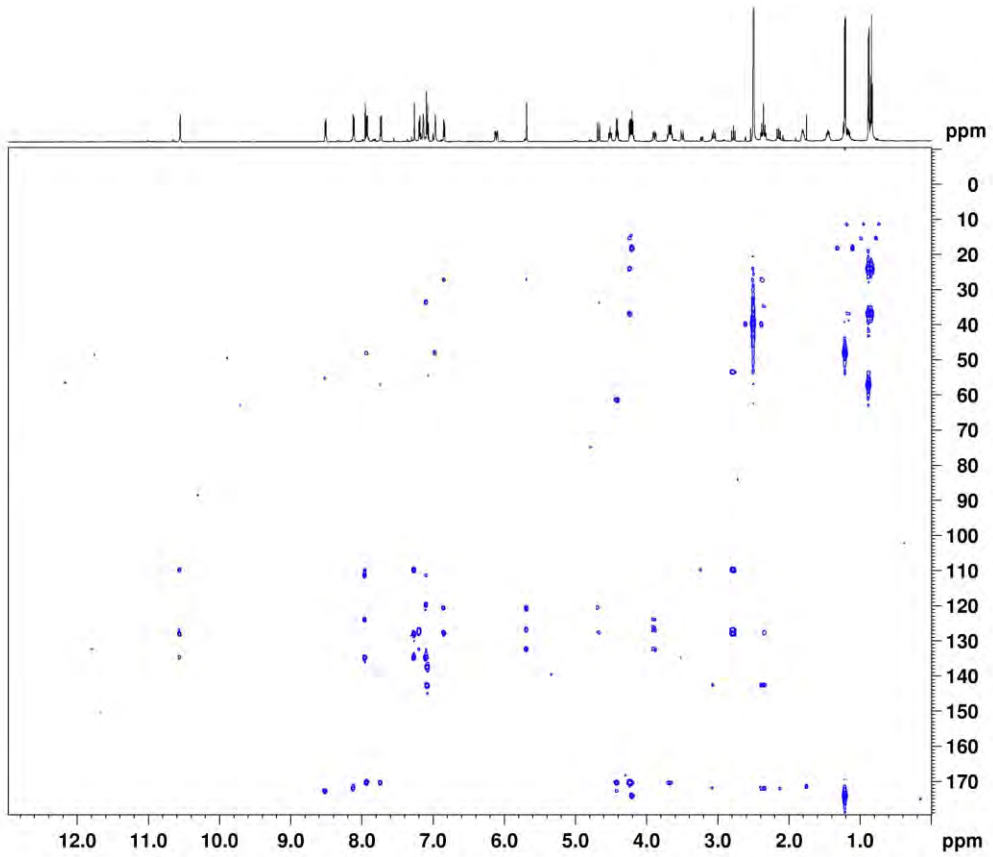

Macrocyclic Product **16d**

```

Current Data Parameters
NAME      BC-III-222E
EXPNO    2
PROCNO   1

F2 - Acquisition Parameters
Date_    20150518
Time     21.15
INSTRUM  av600
PROBHD   5 mm TBI5
PULPROG  zg
TD        65536
SOLVENT  DMSO
NS        16
DS        0
SWH       12376.237 Hz
FIDRES   0.188846 Hz
AQ        2.6477044 sec
RG        22.6
DW        40.400 usec
DE        6.50 usec
TE        298.0 K
D1        2.00000000 sec
TD0       1
    
```

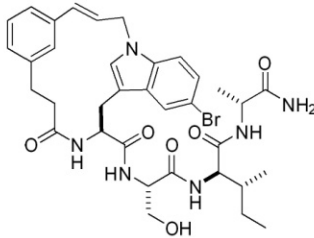

```

===== CHANNEL f1 =====
NUC1      1H
P1        10.88 usec
PL1       -2.00 dB
PL1W      39.81071854 W
SF01      600.1336008 MHz

F2 - Processing parameters
SI        65536
SF        600.1300074 MHz
WDW       EM
SSB       0
LB        0.30 Hz
GB        0
PC        1.00
    
```

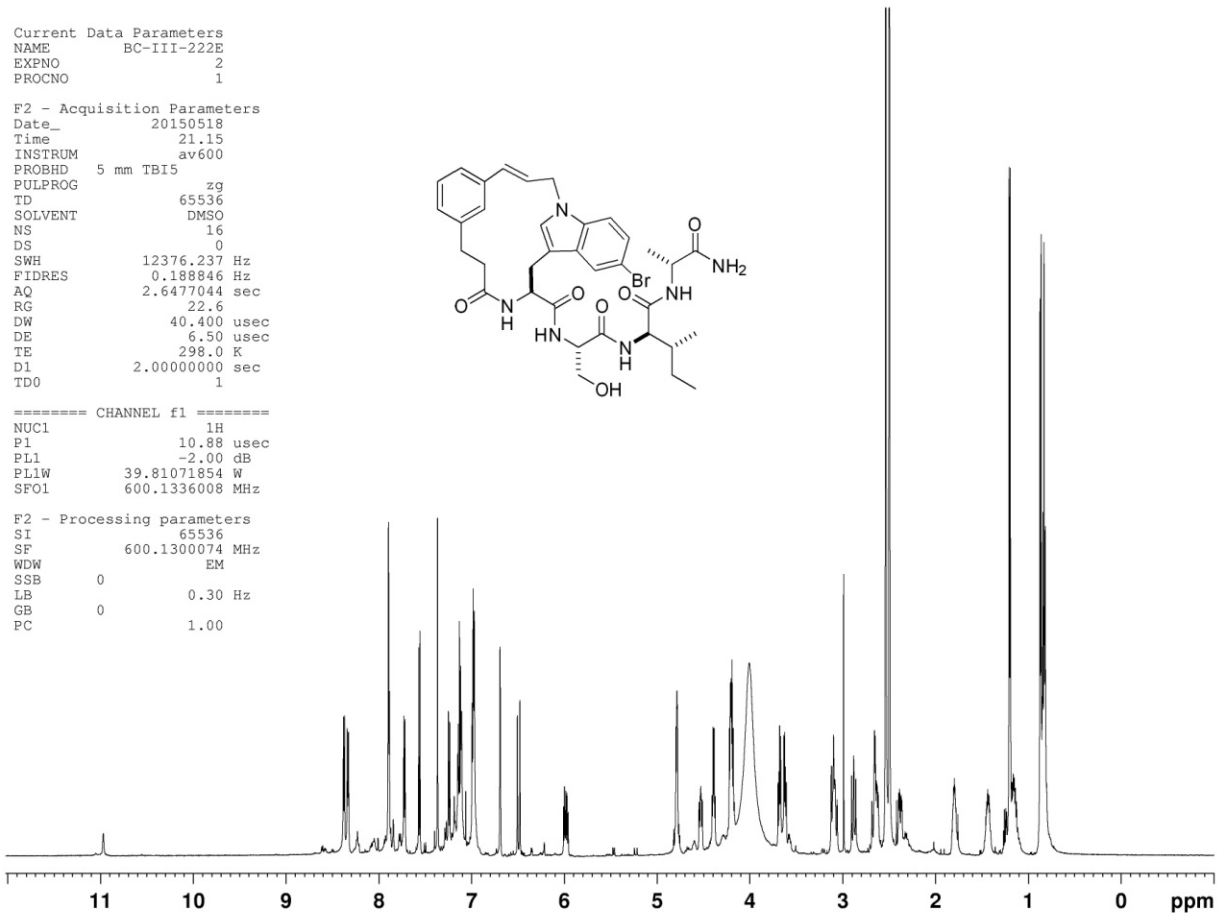

```

Current Data Parameters
NAME      BC-III-222E
EXPNO    6
PROCNO   1

F2 - Acquisition Parameters
Date_    20150518
Time     21.19
INSTRUM  av600
PROBHD   5 mm TBI5
PULPROG  cosygprgrf
TD        2048
SOLVENT  DMSO
NS        2
DS        16
SWH       7183.908 Hz
FIDRES   3.507768 Hz
AQ        0.1425908 sec
RG        456.1
DW        65.600 usec
DE        6.50 usec
TE        298.0 K
D0        0.00000300 sec
D1        1.00000000 sec
D11       0.03000000 sec
D12       0.00002000 sec
D16       0.00020000 sec
IN0       0.00013920 sec
    
```

```

===== CHANNEL f1 =====
NUC1      1H
P0        8.00 usec
P1        10.88 usec
PL1       -2.00 dB
PL9       120.00 dB
PL1W      39.81071854 W
PL5W      0 W
SF01      600.1336008 MHz

----- GRADIENT CHANNEL -----
GPRAM1   0 % SINE.100
GPFY1    0 %
GPEZ1    10.00 %
P16      1000.00 usec

F1 - Acquisition parameters
TD        512
SF01      600.1336 MHz
FIDRES   14.031077 Hz
SW        11.971 ppm
F2MODE    QF

F2 - Processing parameters
SI        4096
SF        600.1300066 MHz
WDW       QSINE
SSB       1.5
LB        0 Hz
GB        0
PC        1.00

F1 - Processing parameters
SI        4096
MC2       QF
SF        600.1300059 MHz
SSB       1.5
LB        0 Hz
GB        0
    
```

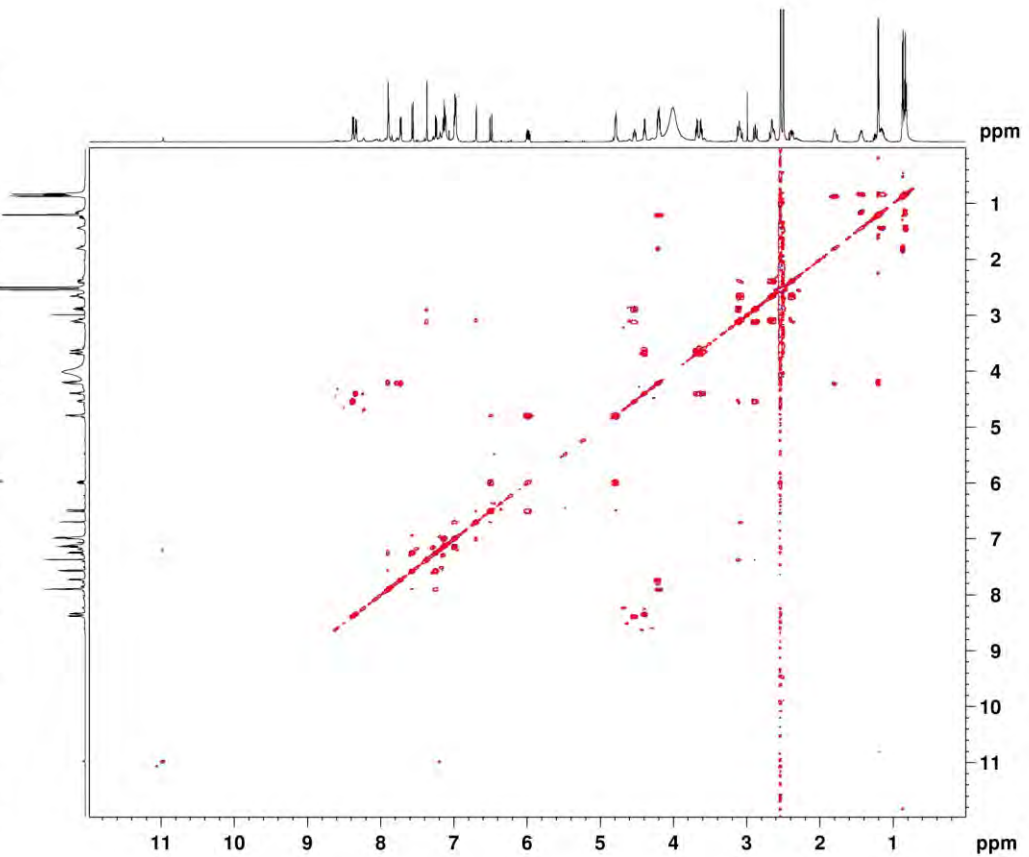

```

Current Data Parameters
NAME      SC-111-222E
EXNO     7
PROCNO   1

F2 - Acquisition Parameters
Date_    20150518
Time     21:40
INSTRUM  spect
PROBHD   5 mm TBI5
PULPROG  zgpg30
TD       65536
SOLVENT  DMSO
NS       2
DS       16
SWH      7788.362 Hz
FIDRES   3.802814 Hz
AQ       0.1315236 sec
RG       1605.5
DM       64.200 usec
DE       6.50 usec
TE       298.2 K
DQ       0.00003727 sec
D1       1.00000000 sec
D2       0.06000000 sec
D3       0.00002000 sec
D4       0.00020000 sec
INO      0.00012840 sec
LI       24

----- CHANNEL f1 -----
NUC1     1H
P1       10.00 usec
P2       21.76 usec
P3       20.00 usec
P4       40.00 usec
P5       60.00 usec
P6       3000.00 usec
P7       2500.00 usec
P8       120.00 dB
P9       -2.00 dB
P10      9.31 dB
PL1W     39.31071854 W
PL2W     2.44442179 W
SFO1     600.1339008 MHz
SFO2     120.00 MHz
SFNAM1   equal00.1000
SFOAL1   1.000
SFOFF1   -14.6644 Hz

----- GRADIENT CHANNEL -----
GPNAM1   SINE.100
GPNAM2   SINE.100
GPA1     0 %
GPA2     0 %
GPA3     0 %
GPA4     0 %
GPA5     31.00 %
GPA6     11.00 %
P16      1000.00 usec

F1 - Acquisition parameters
ID       512
SFO1     600.1339008 MHz
FIDRES   15.211276 Hz
SW       12.977 ppm
F2MODE   States-32H1

F2 - Processing parameters
SI       4096
SF       600.1300666 MHz
WDW      EM
SSB      2
LB       0 Hz
GB       0
PC       1.00

F1 - Processing parameters
SI       4096
MCX2     States-32H1
SF       600.1300666 MHz
WDW      EM
SSB      2
LB       0 Hz
GB       0

```

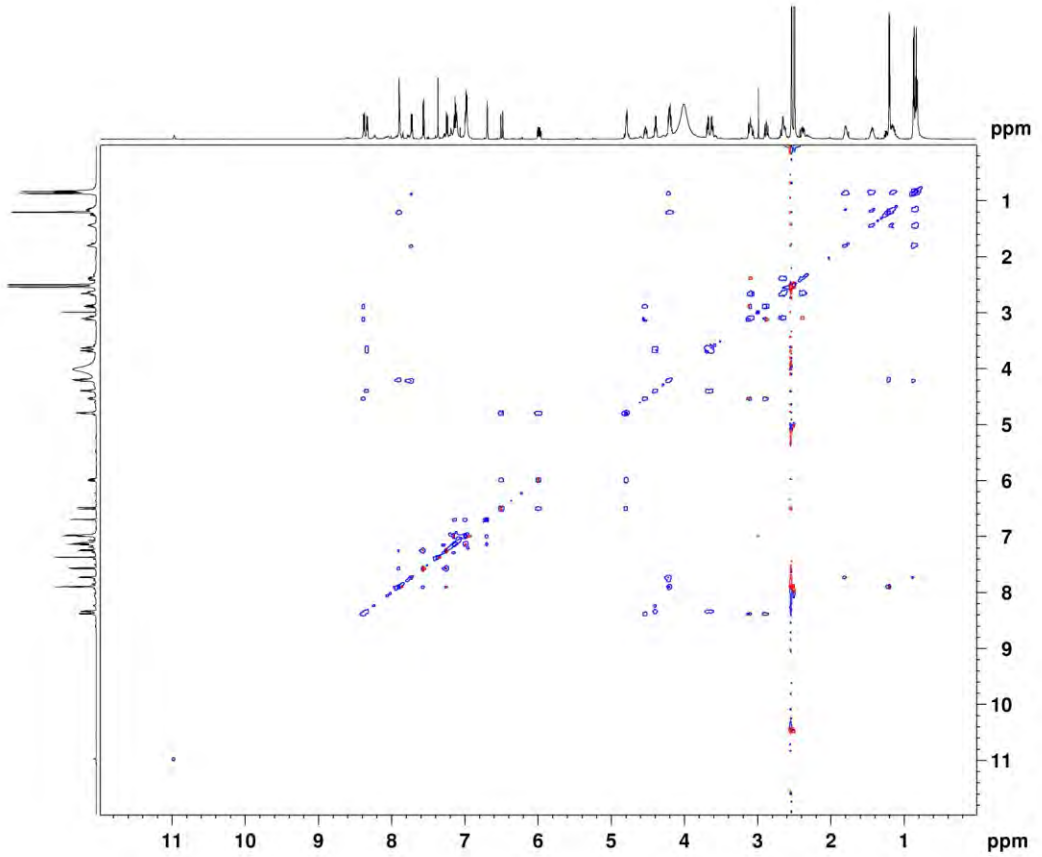

```

Current Data Parameters
NAME      SC-111-222E
EXNO     8
PROCNO   2

F2 - Acquisition Parameters
Date_    20150518
Time     22:02
INSTRUM  spect
PROBHD   5 mm TBI5
PULPROG  zgpg30
TD       65536
SOLVENT  DMSO
NS       2
DS       16
SWH      7788.362 Hz
FIDRES   3.802814 Hz
AQ       0.1315236 sec
RG       1605.5
DM       64.200 usec
DE       6.50 usec
TE       298.2 K
DQ       0.00003727 sec
D1       1.00000000 sec
D2       0.06000000 sec
D3       0.00002000 sec
D4       0.00020000 sec
INO      0.00012840 sec
LI       24

----- CHANNEL C1 -----
NUC1     13C
P1       10.00 usec
P2       21.76 usec
P3       20.00 usec
P4       40.00 usec
P5       60.00 usec
P6       3000.00 usec
P7       2500.00 usec
P8       120.00 dB
P9       -2.00 dB
P10      9.31 dB
PL1W     130.75417045 W
PL2W     15.32450985 W
SFO1     125.7611722 MHz
SFO2     120.00 MHz
SFNAM1   equal00.1000
SFOAL1   1.000
SFOFF1   0 Hz

----- CHANNEL C2 -----
GPNAM1   SINE.100
GPNAM2   SINE.100
GPA1     0 %
GPA2     0 %
GPA3     0 %
GPA4     0 %
GPA5     80.00 %
GPA6     20.10 %
P16      1000.00 usec

F2 - Acquisition parameters
ID       254
SFO1     125.7611722 MHz
FIDRES   34.220824 Hz
SW       160.000 ppm
F2MODE   Echo-Ac12sec

F2 - Processing parameters
SI       4096
SF       504.1200532 MHz
WDW      EM
SSB      2
LB       0 Hz
GB       0
PC       1.00

F1 - Processing parameters
SI       4096
MCX2     echo-ac12sec
SF       125.7611722 MHz
WDW      EM
SSB      2
LB       0 Hz
GB       0

```

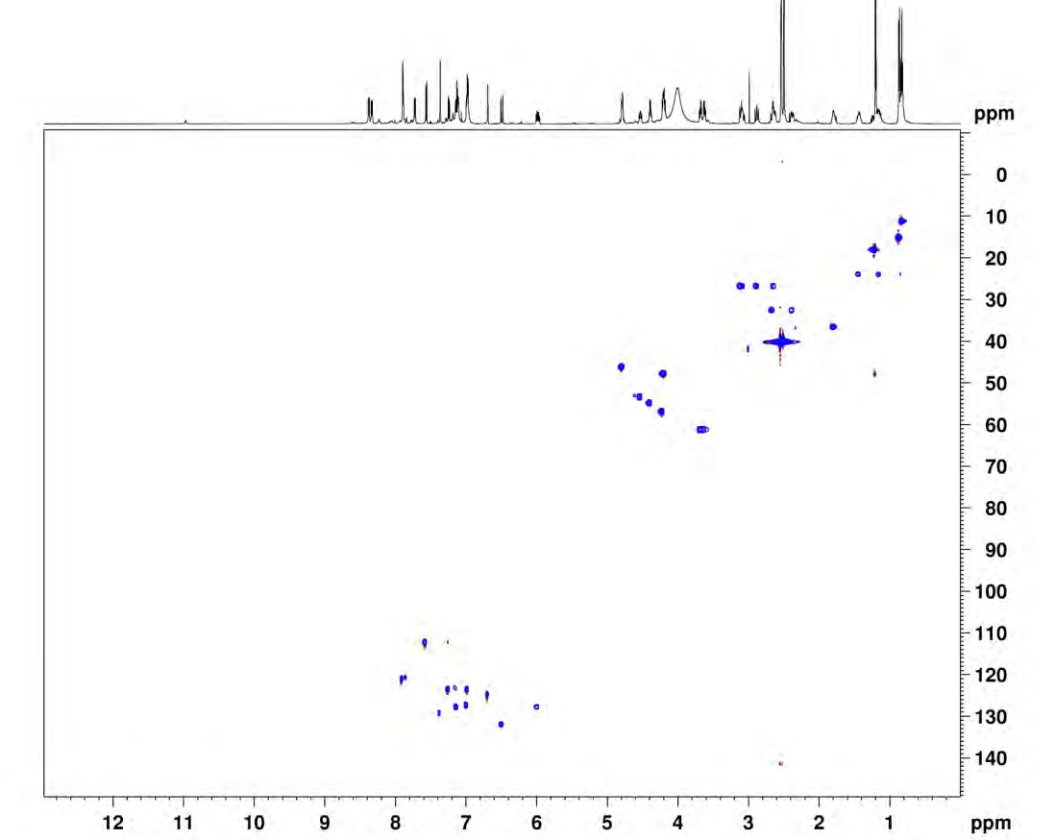

```

Current Data Parameters
NAME: 80-111-2222
EXNO: 9
PROCNO: 1

F2 - Acquisition Parameters
Date_: 20150518
Time: 22.49
INSTRUM: spect
PROBHD: 5 mm BBI5
PULPROG: zgpg30
TD: 65536
SOLVENT: DMSO
NS: 2048
DS: 4
SWH: 7789.142 Hz
FIDRES: 0.1315314 Hz
AQ: 0.1315314 sec
RG: 260.58
DM: 64.700 usec
DE: 6.90 usec
TE: 297.2 K
CMT2: 145.000000
CMT3: 7.000000
DD: 0.0000000 sec
DI: 1.0000000 sec
DE: 0.0034828 sec
DK: 0.0714286 sec
DL1: 0.0002000 sec
LNO: 0.0000174 sec

----- CHANNEL f1 -----
NUC1: 1H
P1: 10.89 usec
P2: 21.76 usec
PL1: -2.00 dB
PL12: 0.0000000 sec
PL1W: 89.81071834 W
SFO1: 400.1339008 Mhz

----- CHANNEL f2 -----
NUC2: 13C
P3: 19.50 usec
P4: 3.00 dB
PL2W: 150.35617045 W
SFO2: 100.6261155 Mhz

----- GRADIENT CHANNEL -----
GPMAX1: SINE.100
GPMAX2: SINE.100
GPMAX3: SINE.100
GPR1: 0 %
GPR2: 0 %
GPR3: 0 %
GPR4: 0 %
GPR5: 0 %
GPR6: 50.00 %
GPR7: 30.00 %
GPR8: 40.10 %
GPR9: 1000.00 usec

F1 - Acquisition parameters
TD: 256
SFO1: 100.6261155 Mhz
FIDRES: 112.007698 Hz
AQ: 190.000 sec
RG: 0
PULPROG: zgpg30
PC: 1.40

F2 - Processing parameters
SI: 4096
SF: 600.130044 Mhz
WDW: COSY
SSB: 0
LB: 0 Hz
GB: 0
PC: 1.40

F1 - Processing parameters
SI: 4096
SF: 100.6261155 Mhz
WDW: COSY
SSB: 0
LB: 0 Hz
GB: 0

```

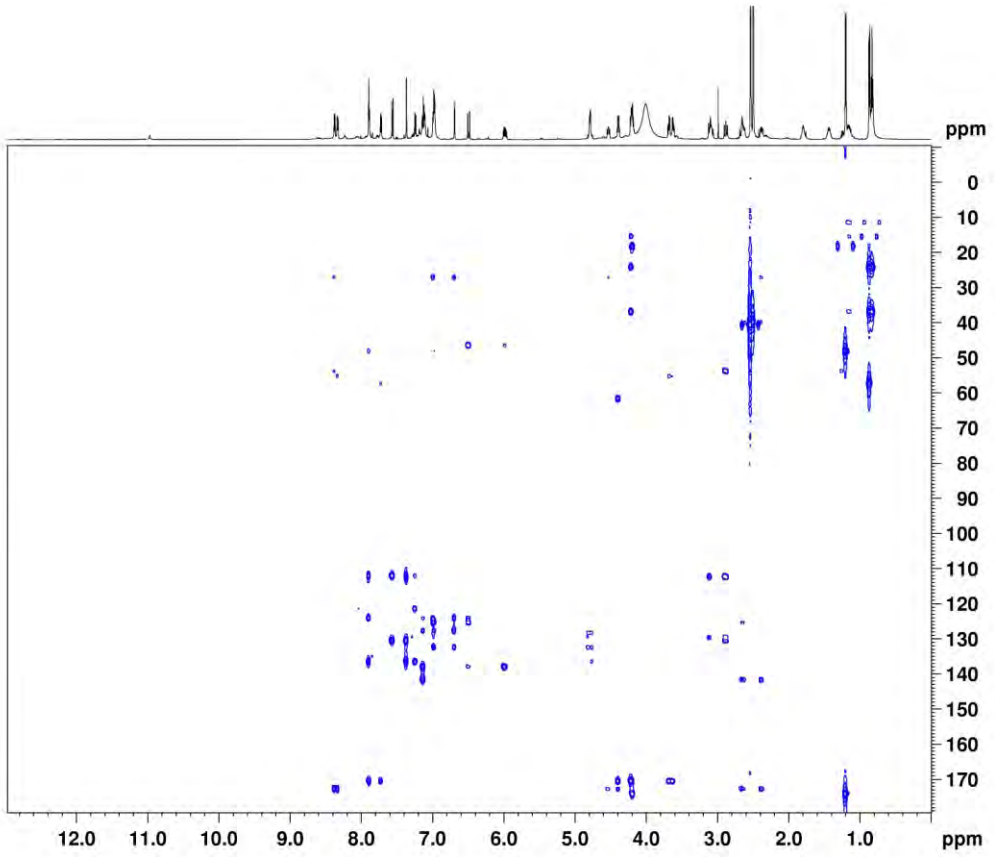



# Acyclic Precursor 13

Current Data Parameters  
 NAME BC-III-139\_2ndpure  
 EXPNO 1  
 PROCNO 1

F2 - Acquisition Parameters  
 Date\_ 20150220  
 Time 15.56  
 INSTRUM av500  
 PROBHD 5 mm DCH 13C-1  
 PULPROG zg30  
 TD 65536  
 SOLVENT DMSO  
 NS 48  
 DS 0  
 SWH 10000.000 Hz  
 FIDRES 0.152588 Hz  
 AQ 3.2768500 sec  
 RG 12.14  
 DW 50.000 usec  
 DE 10.00 usec  
 TE 298.0 K  
 D1 2.00000000 sec  
 TD0 1

===== CHANNEL f1 =====  
 SFO1 500.1330008 MHz  
 NUC1 1H  
 P1 10.00 usec  
 PLW1 13.50000000 W

F2 - Processing parameters  
 SI 65536  
 SF 500.1300146 MHz  
 WDW EM  
 SSB 0  
 LB 0.30 Hz  
 GB 0  
 PC 1.00

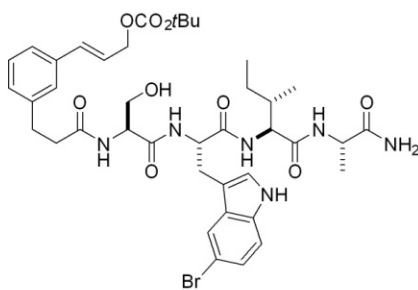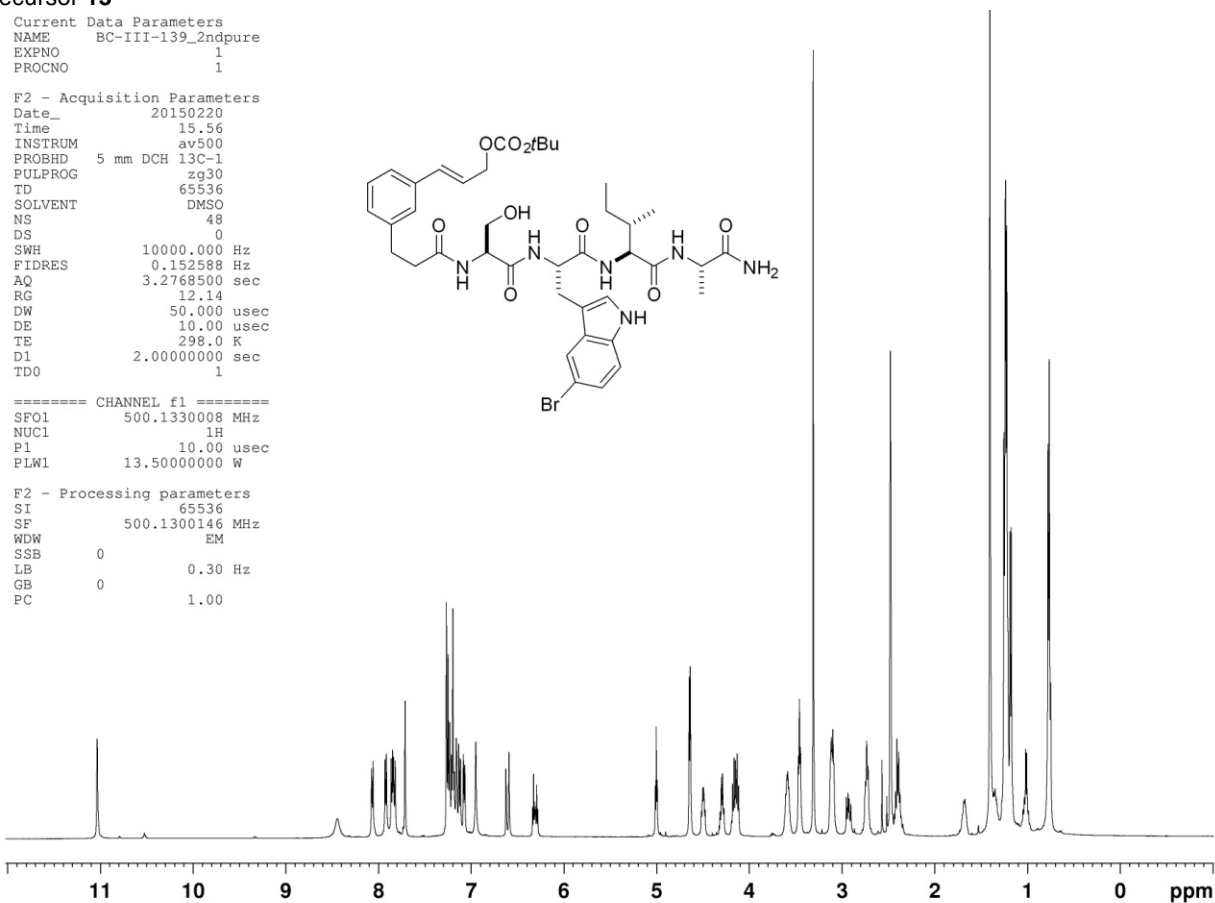

173.98  
 171.58  
 171.45  
 170.45  
 170.32  
 152.81  
 141.78  
 135.84  
 134.70  
 133.44  
 129.20  
 128.63  
 128.03  
 126.41  
 125.53  
 124.52  
 123.28  
 120.68  
 113.26  
 111.04  
 109.76  
 81.53  
 66.91  
 61.79  
 57.02  
 54.96  
 53.53  
 48.05  
 36.61  
 30.93  
 27.38  
 24.23  
 18.19  
 18.06  
 16.72  
 15.11  
 11.10

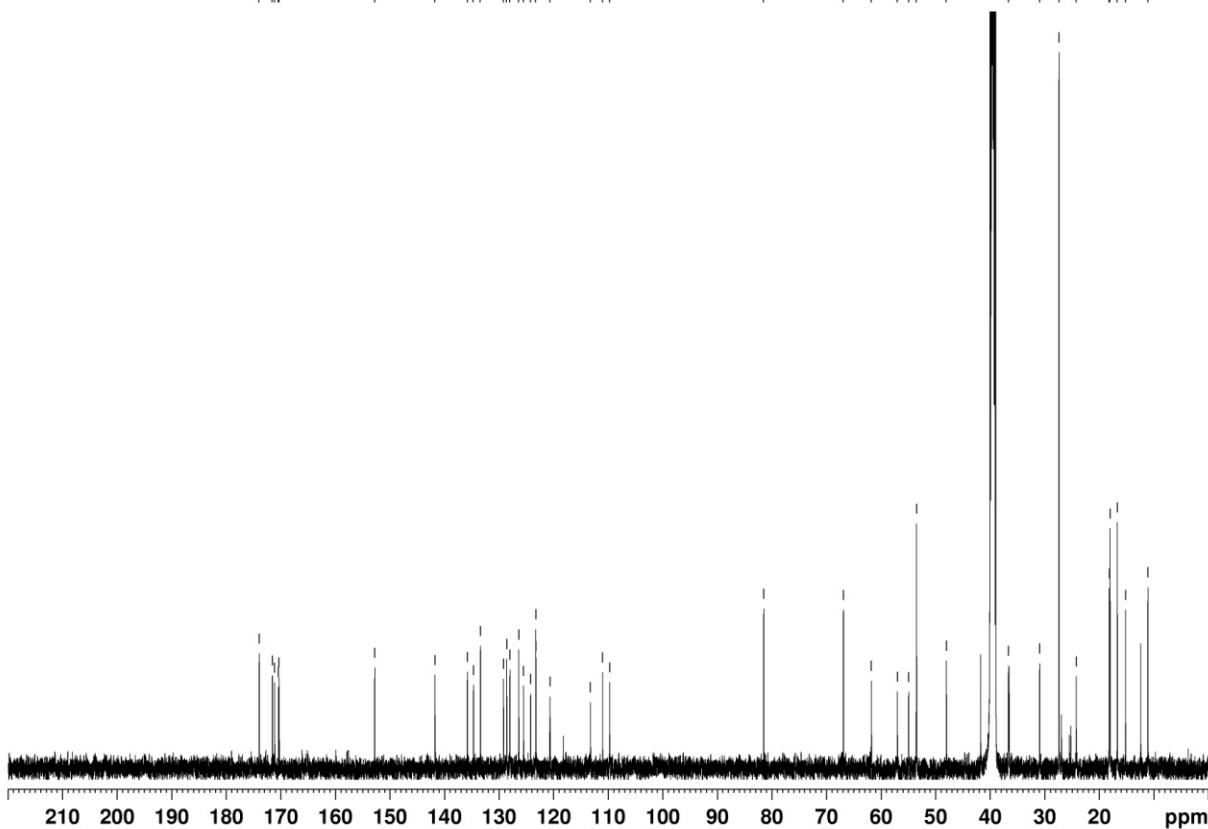

Macrocyclic Product 17a

Current Data Parameters  
 NAME BC3-153A  
 EXPNO 2  
 PROCNO 1

F2 - Acquisition Parameters  
 Date\_ 20150227  
 Time 17.51  
 INSTRUM av600  
 PROBHD 5 mm TBI5  
 PULPROG zg  
 TD 65536  
 SOLVENT DMSO  
 NS 8  
 DS 0  
 SWH 12376.237 Hz  
 FIDRES 0.188846 Hz  
 AQ 2.6477044 sec  
 RG 57  
 DW 40.400 usec  
 DE 6.50 usec  
 TE 303.0 K  
 D1 2.00000000 sec  
 TD0 1

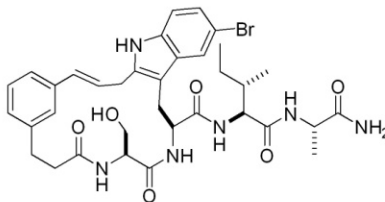

===== CHANNEL f1 =====  
 NUC1 1H  
 P1 10.57 usec  
 PL1 -2.00 dB  
 PL1W 39.81071854 W  
 SFO1 600.1336008 MHz

F2 - Processing parameters  
 SI 65536  
 SF 600.1300069 MHz  
 WDW EM  
 SSB 0  
 LB 0.30 Hz  
 GB 0  
 PC 1.00

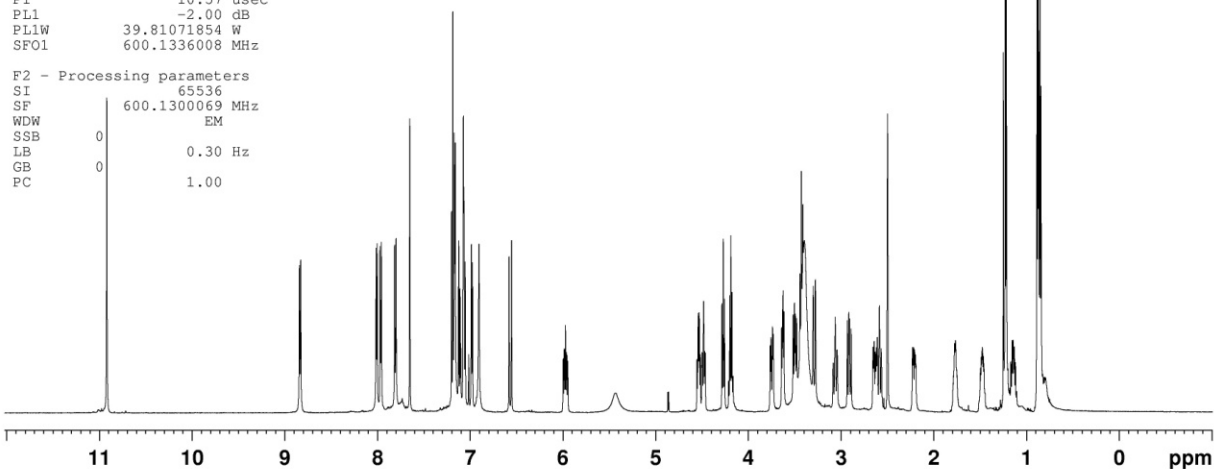

Current Data Parameters  
 NAME BC3-153A  
 EXPNO 6  
 PROCNO 1

F2 - Acquisition Parameters  
 Date\_ 20150227  
 Time 17.54  
 INSTRUM av600  
 PROBHD 5 mm TBI5  
 PULPROG cosygpprgf  
 TD 2048  
 SOLVENT DMSO  
 NS 2  
 DS 16  
 SWH 7183.908 Hz  
 FIDRES 3.507768 Hz  
 AQ 0.1425908 sec  
 RG 362  
 DW 69.600 usec  
 DE 6.50 usec  
 TE 303.0 K  
 D0 0.00000300 sec  
 D1 1.00000000 sec  
 D11 0.03000000 sec  
 D12 0.00000000 sec  
 D16 0.00020000 sec  
 IN0 0.00013920 sec

===== CHANNEL f1 =====  
 NUC1 1H  
 P0 8.00 usec  
 P1 10.57 usec  
 PL1 -2.00 dB  
 PL9 120.00 dB  
 PL1W 39.81071854 W  
 PLSW 0 W  
 SFO1 600.1336008 MHz

===== GRADIENT CHANNEL =====  
 GPHAM1 SINE.100  
 GPC1 0 %  
 GPC2 0 %  
 GPC3 10.00 %  
 P16 1000.00 usec

F1 - Acquisition parameters  
 TD 259  
 SFO1 600.1336 MHz  
 FIDRES 27.737112 Hz  
 SW 11.971 ppm  
 F2MODE QF

F2 - Processing parameters  
 SI 4096  
 SF 600.1300052 MHz  
 WDW QSINE  
 SSB 1.5  
 LB 0 Hz  
 GB 0  
 PC 1.00

F1 - Processing parameters  
 SI 4096  
 MC2 QF  
 SF 600.1300052 MHz  
 WDW QSINE  
 SSB 1.5  
 LB 0 Hz  
 GB 0

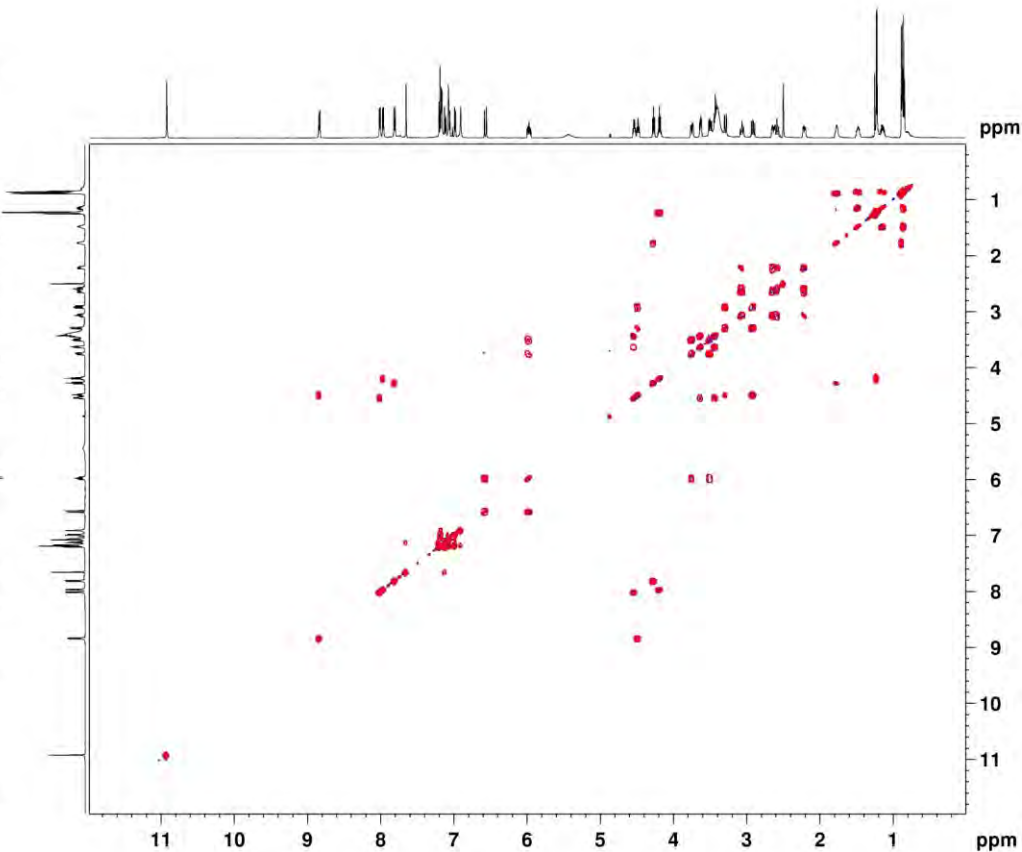

```

Current Data Parameters
NAME      BCI-153A
EXPNO    7
PROCNO   1

F2 - Acquisition Parameters
Date_    20150217
Time     18.11
INSTRUM  spect
PROBHD   5 mm TBI5
PULPROG  zgpg30
TD        65536
SOLVENT  DMSO
NS        2
DS        4
SWH       7788.162 Hz
F2DRS    3.802814 Hz
AQ        0.1315316 sec
RG        1825.5
DW        84.200 usec
DE        6.50 usec
TE        303.2 K
DD        0.00003747 sec
DT        1.00000000 sec
D2        0.00000000 sec
D12       0.00002000 sec
D16       0.00020000 sec
LNO       0.00012840 sec
LI        24

```

```

----- CHANNEL f1 -----
NUC1      13C
P1        10.00 usec
P2        21.14 usec
P3        28.48 usec
P4        40.00 usec
P5        80.00 usec
P6        3000.00 usec
P7        2500.00 usec
P8        120.00 dB
P9        2.00 dB
P10       9.56 dB
P11       39.81071854 W
P12       2.17971292 W
SFO1      600.1339000 MHz
SF02      120.00 MHz
SFNAM1    Squalo-13000
SFOAL1    1.000
SFOFF1    -1456.44 Hz

----- GRADIENT CHANNEL -----
GPNAM1    SINE.100
GPNAM2    SINE.100
GPA1      0 %
GPA2      0 %
GPA3      0 %
GPA4      0 %
GPA5      31.00 %
GPA6      11.00 %
GPA7      1000.00 usec

```

```

F3 - Acquisition parameters
ID        130
SFO1      600.1339 MHz
F2DRS    39.903017 Hz
SW        12.977 ppm
FREQMODE States-1991

F2 - Processing parameters
SI        4096
SF        600.1300036 MHz
WDW       EM
SSB       0
LB        0 Hz
GB        0
PC        1.00

F1 - Processing parameters
SI        4096
MCX       States-1991
SF        600.1200051 MHz
WDW       EM
SSB       0
LB        0 Hz
GB        0

```

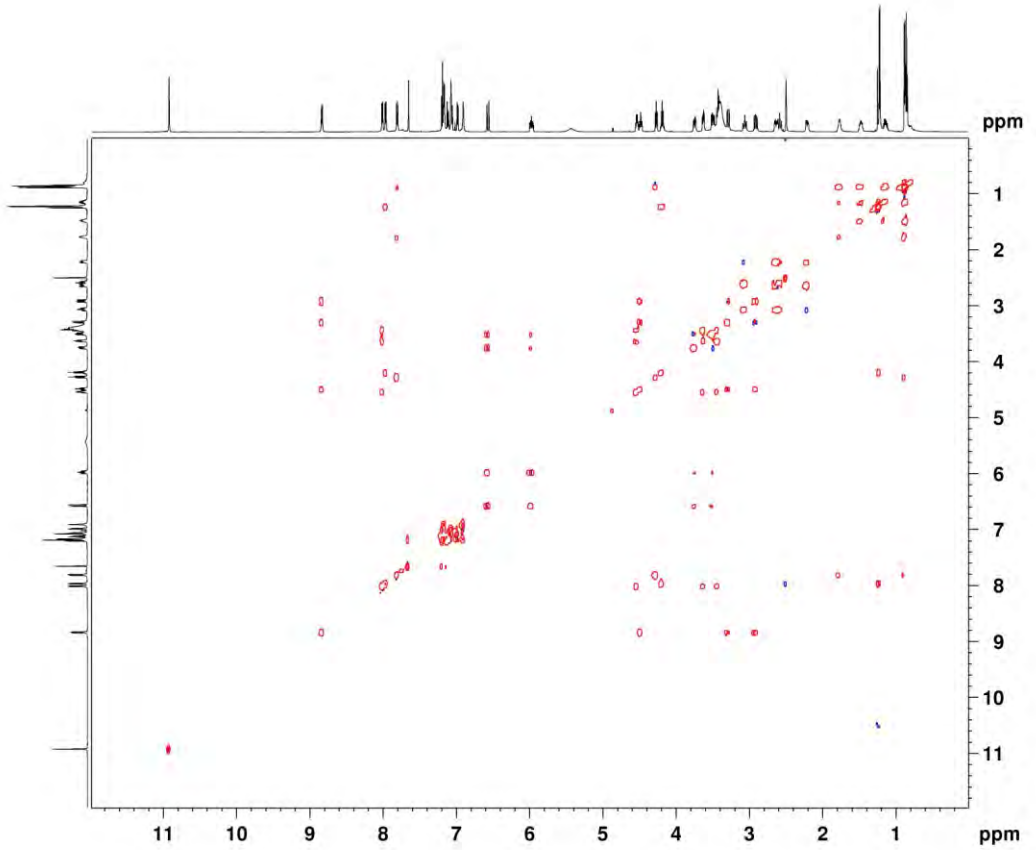

```

Current Data Parameters
NAME      BCI-153A
EXPNO    7
PROCNO   1

F2 - Acquisition Parameters
Date_    20150217
Time     18.11
INSTRUM  spect
PROBHD   5 mm TBI5
PULPROG  zgpg30
TD        65536
SOLVENT  DMSO
NS        2
DS        4
SWH       7788.162 Hz
F2DRS    3.802814 Hz
AQ        0.1315316 sec
RG        1825.5
DW        84.200 usec
DE        6.50 usec
TE        303.2 K
DD        0.00003747 sec
DT        1.00000000 sec
D2        0.00000000 sec
D12       0.00020000 sec
D16       0.00020000 sec
LNO       0.00012840 sec
LI        24

```

```

----- CHANNEL f1 -----
NUC1      13C
P1        10.00 usec
P2        21.14 usec
P3        28.48 usec
P4        40.00 usec
P5        80.00 usec
P6        3000.00 usec
P7        2500.00 usec
P8        120.00 dB
P9        2.00 dB
P10       9.56 dB
P11       39.81071854 W
P12       2.17971292 W
SFO1      600.1339000 MHz
SF02      120.00 MHz
SFNAM1    Squalo-13000
SFOAL1    1.000
SFOFF1    -1456.44 Hz

----- GRADIENT CHANNEL -----
GPNAM1    SINE.100
GPNAM2    SINE.100
GPA1      0 %
GPA2      0 %
GPA3      0 %
GPA4      0 %
GPA5      31.00 %
GPA6      11.00 %
GPA7      1000.00 usec

```

```

F3 - Acquisition parameters
ID        130
SFO1      600.1339 MHz
F2DRS    39.903017 Hz
SW        12.977 ppm
FREQMODE States-1991

F2 - Processing parameters
SI        4096
SF        600.1300036 MHz
WDW       EM
SSB       0
LB        0 Hz
GB        0
PC        1.00

F1 - Processing parameters
SI        4096
MCX       States-1991
SF        600.1200051 MHz
WDW       EM
SSB       0
LB        0 Hz
GB        0

```

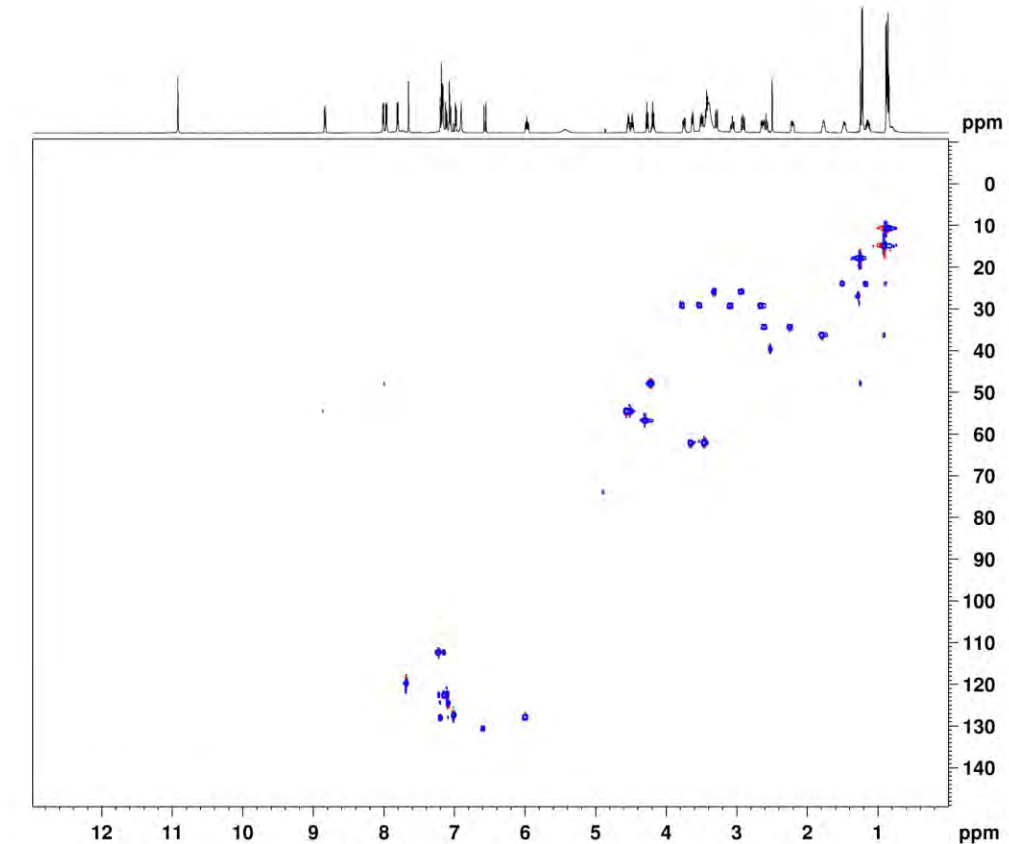

```

Current Data Parameters
NAME      RUC-155A
EXPNO    3
PROCNO   1

F2 - Acquisition Parameters
Date_    20150227
Time     18.32
INSTRUM  spect
PROBHD   5 mm ERB
PULPROG  zgpg30
TD        65536
SOLVENT  DMSO
NS        12
DS        4
SWH       7788.162 Hz
FIDRES    3.202814 Hz
AQ        0.131316 sec
RG         26000
AQ        64.000 usec
DE         6.00 usec
TE        302.6 K
CST12     145.000000
CST13     9.000000
D0         0.0000000 sec
D1         1.5000000 sec
D2         0.0034829 sec
D3         0.0142897 sec
D4         0.0002000 sec
D5         0.0001745 sec
IND

----- CHANNEL f1 -----
NUC1      1H
P1        10.57 usec
P2        21.14 usec
PL1       -2.00 dB
PL2       19.8101824 W
SFO1      400.1435000 MHz

----- CHANNEL f2 -----
NUC2      13C
P3        19.00 usec
P4        -3.00 dB
PL3       150.35617045 W
SFO2      100.6261260 MHz

----- GRADIENT CHANNEL -----
GPNAM1    SINE.100
GPNAM2    SINE.100
GPNAM3    SINE.100
GPX1      0 %
GPX2      0 %
GPX3      0 %
GPY1      0 %
GPY2      0 %
GPY3      0 %
GPE1      50.00 %
GPE2      30.00 %
GPE3      40.10 %
PT6       1000.00 usec

F1 - Acquisition parameters
TD         215
SFO1      150.5156 MHz
FIDRES     133.367100 Hz
SW         190.000 ppm
F0M0000    GP

F2 - Processing parameters
SI         4096
SF         800.1300009 MHz
WDW        EM
SSB        0
LB         0 Hz
GB         0
PC         1.40

F1 - Processing parameters
SI         4096
SF         150.5029181 MHz
WDW        EM
SSB        0
LB         0 Hz
GB         0

```

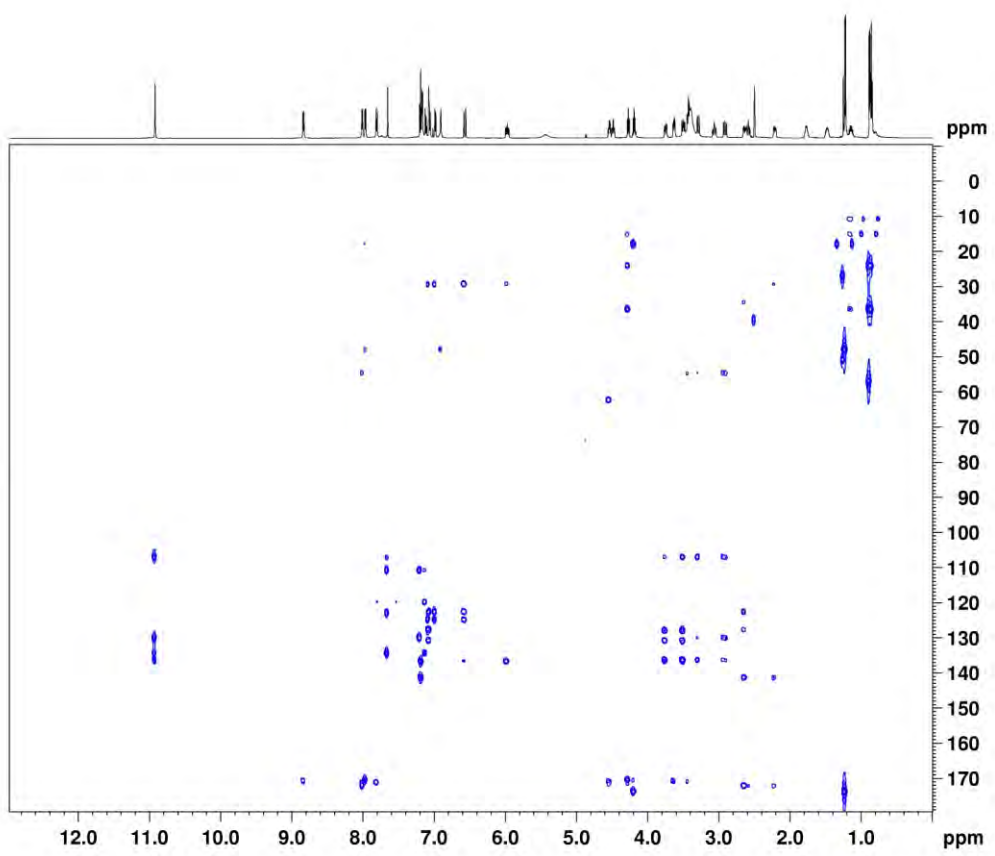

Macroyclic Product 17b

```

Current Data Parameters
NAME      BC-III-153C1
EXPNO     3
PROCNO    1

F2 - Acquisition Parameters
Date_     20150702
Time      17.34
INSTRUM   av600
PROBHD    5 mm TBI5
PULPROG   zgpr
TD         65536
SOLVENT   DMSO
NS         40
DS         0
SWH        12376.237 Hz
FIDRES     0.188846 Hz
AQ         2.6477044 sec
RG         71.8
DW         40.400 usec
DE         6.50 usec
TE         298.0 K
D1         2.00000000 sec
D12        0.00002000 sec
TD0        1
    
```

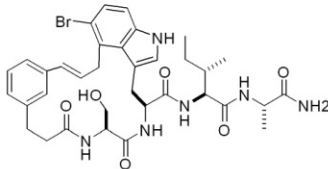

```

===== CHANNEL f1 =====
NUC1      1H
P1         10.25 usec
PL1        -2.00 dB
PL19       51.36 dB
PL1W       39.81071854 W
PL9W       0.00018365 W
SF01       600.1319961 MHz
    
```

```

F2 - Processing parameters
SI         65536
SF         600.1300068 MHz
WDW        EM
SSB        0
LB         0.30 Hz
GB         0
PC         1.00
    
```

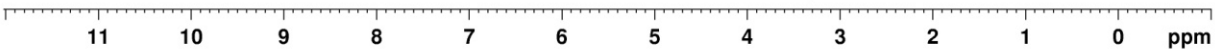

```

Current Data Parameters
NAME      BC-III-153C1
EXPNO     6
PROCNO    1
    
```

```

F2 - Acquisition Parameters
Date_     20150702
Time      17.38
INSTRUM   av600
PROBHD    5 mm TBI5
PULPROG   cosygpprpf
TD         2048
SOLVENT   DMSO
NS         2
DS         16
SWH        7183.908 Hz
FIDRES     3.507768 Hz
AQ         0.1425908 sec
RG         456.1
DW         65.600 usec
DE         6.50 usec
TE         298.0 K
D0         0.0000300 sec
D1         1.00000000 sec
D11        0.03000000 sec
D12        0.00002000 sec
D16        0.00020000 sec
IN0        0.00013920 sec
    
```

```

===== CHANNEL f1 =====
NUC1      1H
P1         8.00 usec
PL1        -2.00 dB
PL19       120.00 dB
PL1W       39.81071854 W
PL9W       0 W
SF01       600.1336008 MHz
    
```

```

----- GRADIENT CHANNEL -----
GPHAM1    SINE.100
GPX1      0 %
GPY1      0 %
GPZ1      10.00 %
P16       1000.00 usec
    
```

```

F1 - Acquisition parameters
TD         512
SF01       600.1336 MHz
FIDRES     14.031077 Hz
SW         11.971 ppm
FhMODE     QF
    
```

```

F2 - Processing parameters
SI         4096
SF         600.1300095 MHz
WDW        QSINE
SSB        1.5
LB         0 Hz
GB         0
PC         1.00
    
```

```

F1 - Processing parameters
SI         4096
MC2        QF
SF         600.1300082 MHz
WDW        QSINE
SSB        1.5
LB         0 Hz
GB         0
    
```

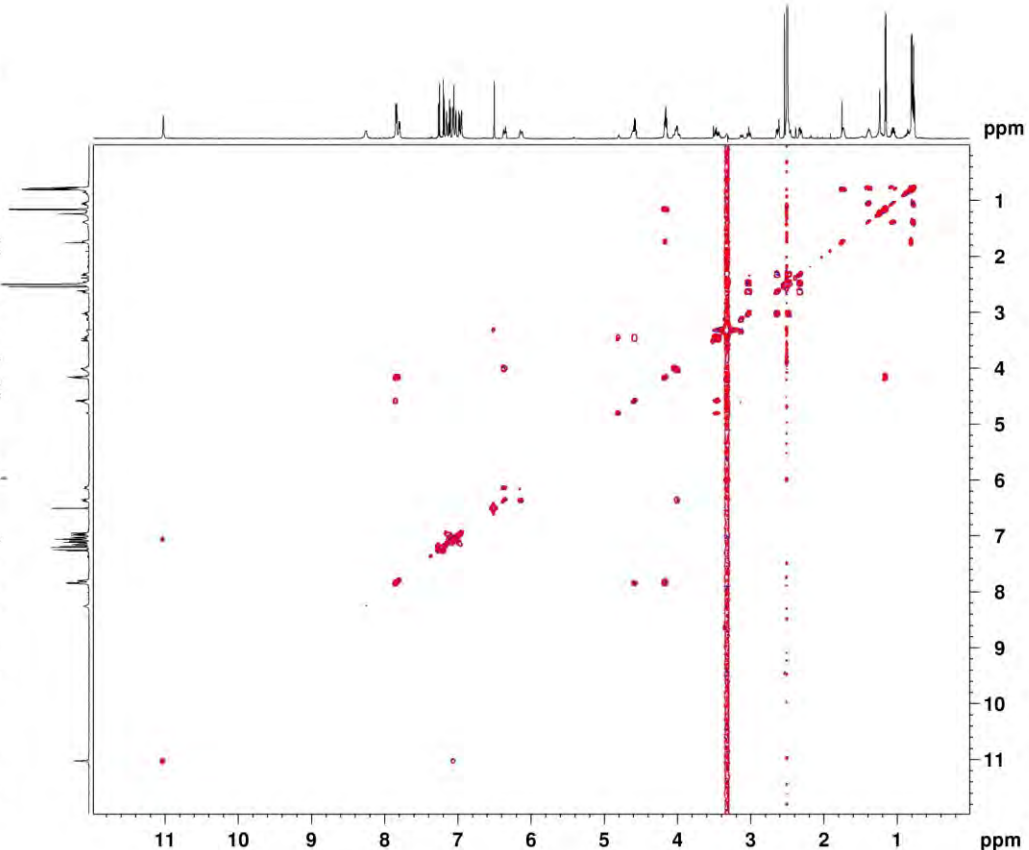

```

Current Data Parameters
NAME      BC-111-153C1
EXPNO    1
PROCNO    1

F2 - Acquisition Parameters
Date_    20150702
Time     17:59
INSTRUM  spect
PROBHD   5 mm TBI5
PULPROG  mvhszgph
TD        2048
SOLVENT  DMSO
NS        24
DS        16
SWH       7788.162 Hz
FIDRES    3.862814 Hz
AQ        0.1315316 sec
RG        162.5
LW        84.200 usec
DE        6.50 usec
TE        298.0 K
D0        0.00053767 sec
D1        1.00000000 sec
D2        0.06000000 sec
D3        0.00020000 sec
D12       0.00020000 sec
D16       0.00020000 sec
IN0       0.00012840 sec
LI        24
  
```

```

===== CHANNEL F1 =====
NUC1      1H
P1        19.25 usec
PL1       20.50 usec
P2        26.48 usec
PL2       40.00 usec
P3        40.00 usec
PL3       80.00 usec
P12       3000.00 usec
PL12      2500.00 usec
PL0       120.00 dB
PL1       -2.00 dB
PL12      9.83 dB
PL1W      39.81071854 W
PL1W2     2.4127454 W
SFO1      600.1339008 MHz
SE1       120.000 dB
SFO1A1    equal00.1000
SFO1A2    1.000
SFO1F1    -1346.44 Hz
  
```

```

===== GRADIENT CHANNEL =====
GPNAM1    SINE.100
GPNAM2    SINE.100
GEX1      0 %
GEX2      0 %
GXY1      0 %
GXY2      0 %
GZ1       31.00 %
GZ2       11.00 %
F1A       1000.00 usec
  
```

```

F1 - Acquisition parameters
TD         512
SFO1      600.1339 MHz
FIDRES     15.211276 Hz
SW         12.977 ppm
PROBHD     States-301
  
```

```

F2 - Processing parameters
SI         4096
SF         600.1300557 MHz
WDW        QSI
SSB        2
LB         0 Hz
GB         0
PC         1.00
  
```

```

F1 - Processing parameters
SI         4096
MCX        States-301
SF         600.1300661 MHz
WDW        2
LB         0 Hz
GB         0
  
```

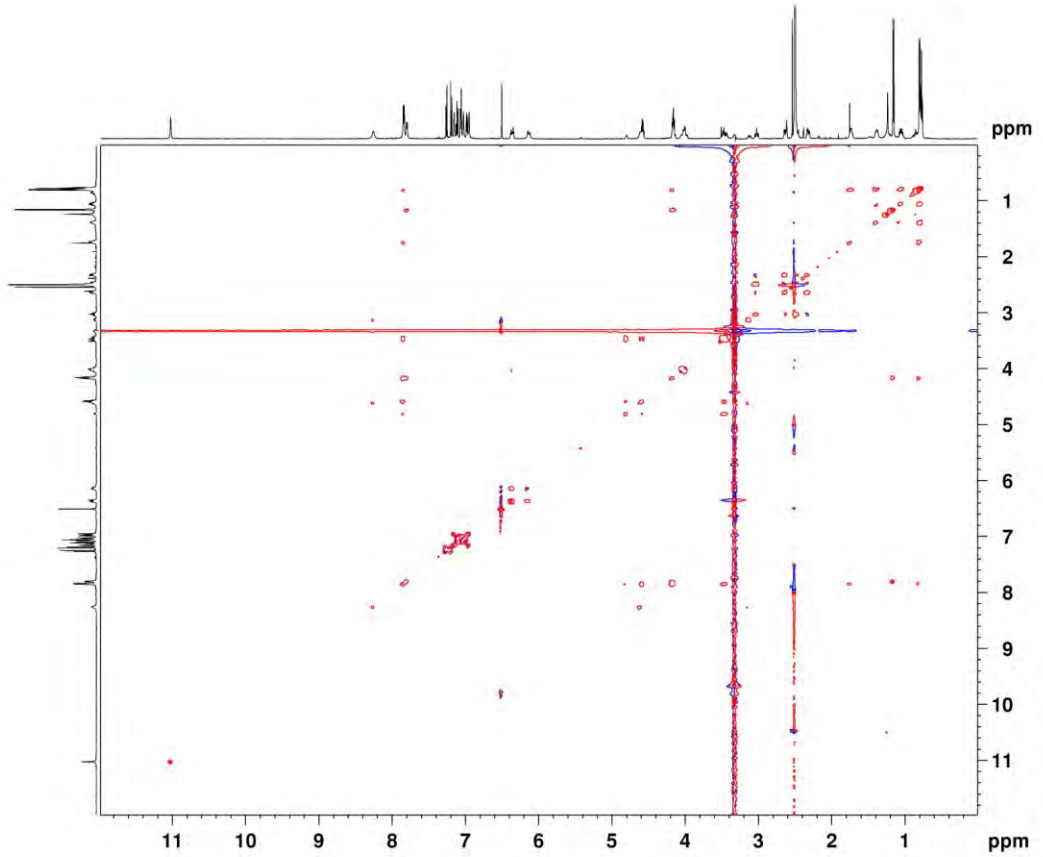

```

Current Data Parameters
NAME      BC-111-153C1
EXPNO    8
PROCNO    1
  
```

```

F2 - Acquisition Parameters
Date_    20150702
Time     18:21
INSTRUM  spect
PROBHD   5 mm TBI5
PULPROG  hepertzgph
TD        2048
SOLVENT  DMSO
NS        24
DS        16
SWH       7788.162 Hz
FIDRES    3.862814 Hz
AQ        0.1315316 sec
RG        162.5
LW        84.200 usec
DE        6.50 usec
TE        298.0 K
D0        0.00053767 sec
D1        1.00000000 sec
D2        0.06000000 sec
D3        0.00020000 sec
D12       0.00020000 sec
D16       0.00020000 sec
IN0       0.00012840 sec
LI        24
  
```

```

===== CHANNEL F1 =====
NUC1      1H
P1        19.25 usec
PL1       20.50 usec
P2        26.48 usec
PL2       40.00 usec
P3        40.00 usec
PL3       80.00 usec
P12       3000.00 usec
PL12      2500.00 usec
PL0       120.00 dB
PL1       -2.00 dB
PL12      9.83 dB
PL1W      39.81071854 W
PL1W2     2.4127454 W
SFO1      600.1339008 MHz
SE1       120.000 dB
SFO1A1    equal00.1000
SFO1A2    1.000
SFO1F1    -1346.44 Hz
  
```

```

===== CHANNEL F2 =====
CPDPRG2   98pp
NUC2      13C
P2        19.25 usec
PL2       20.50 usec
P3        1000.00 usec
PL3       1000.00 usec
P12       1000.00 usec
PL12      120.00 dB
PL1       -2.00 dB
PL12      9.83 dB
PL1W      39.81071854 W
PL1W2     2.4127454 W
SFO2      100.6281505 MHz
SE2       120.000 dB
SFO2A1    equal00.1000
SFO2A2    1.000
SFO2F1    -1346.44 Hz
  
```

```

===== GRADIENT CHANNEL =====
GPNAM1    SINE.100
GPNAM2    SINE.100
GEX1      0 %
GEX2      0 %
GXY1      0 %
GXY2      0 %
GZ1       80.00 %
GZ2       20.00 %
F1A       1000.00 usec
  
```

```

F1 - Acquisition parameters
TD         2048
SFO1      100.6281505 MHz
FIDRES     94.326854 Hz
SW         140.000 ppm
PROBHD     Echo-Antiecho
  
```

```

F2 - Processing parameters
SI         4096
SF         100.6281505 MHz
WDW        EM
SSB        0
LB         1.00 Hz
GB         0
PC         1.40
  
```

```

F1 - Processing parameters
SI         4096
MCX        echo-antiecho
SF         100.6281505 MHz
WDW        2
LB         0 Hz
GB         0
  
```

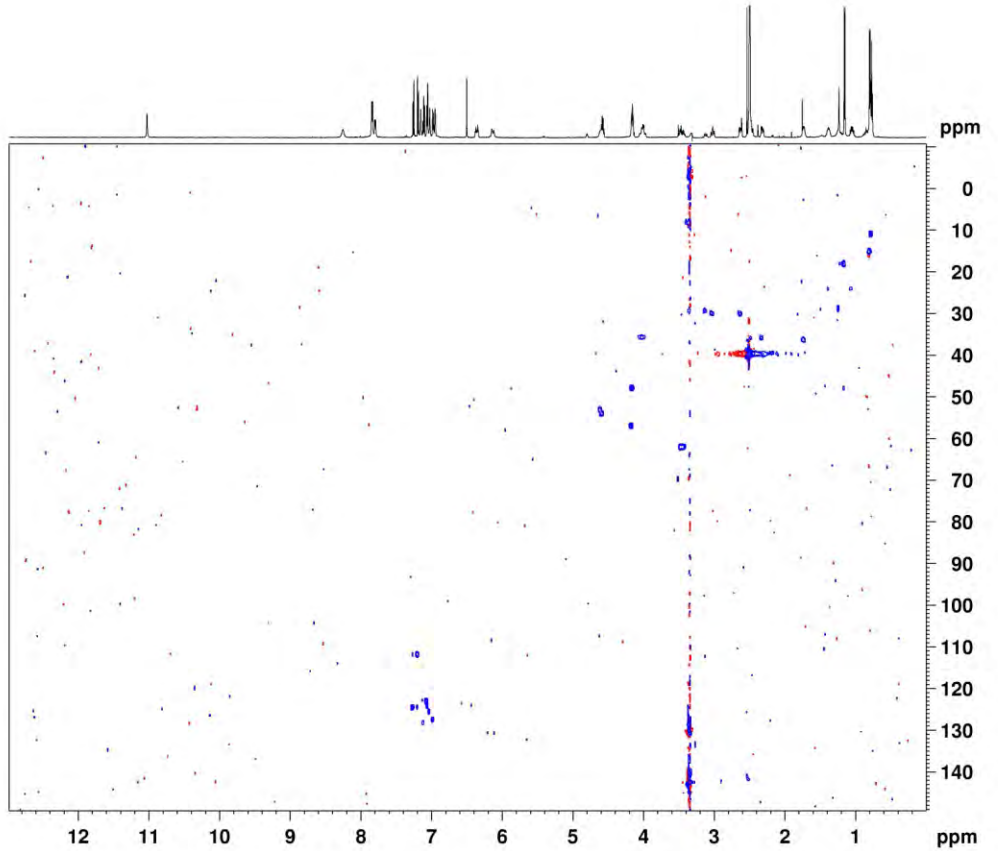

```

Current Data Parameters
NAME      EC-III-19301
EXNO     9
PROCNO   1

F2 - Acquisition Parameters
Date_    20190702
Time     20.41
INSTRUM  spect
PROBHD   5 mm TBI
PULPROG  zgpg30
TD        65536
SOLVENT  DMSO
NS        45
DS        16
SWH       7786.162 Hz
FIDRES   0.202914 Hz
AQ        0.1315316 sec
RG        26008
FW        84.200 usec
DE        6.00 usec
TE        297.4 K
CNS12    145.0000000
CNS13    7.0000000
DD        0.0000000 sec
DI        1.5000000 sec
DZ        0.0004808 sec
DE        0.07142857 sec
D16       0.0002000 sec
LNO       0.0001745 sec

----- CHANNEL f1 -----
NUC1      1H
P1        10.25 usec
P2        20.50 usec
PL1       2.00 dB
PL12      36.81077854 dB
SFO1      600.1330008 MHz

----- CHANNEL f2 -----
NUC2      13C
P3        19.30 usec
P4        -3.00 dB
PL3       150.35617065 dB
SFO2      150.9156257 MHz

----- GRADIENT CHANNEL -----
GPAAM1    SINE.100
GPAAM2    SINE.100
GPAAM3    SINE.100
GPX1      0 k
GPX2      0 k
GPX3      0 k
GPY1      0 k
GPY2      0 k
GPY3      0 k
GPI1      50.00 k
GPI2      30.00 k
GPI3      40.10 k
P16       1000.00 usec

F1 - Acquisition parameters
TD        256
SFO1      150.9156 MHz
FIDRES   112.007636 Hz
SWH       190.000 ppm
PRMODE    0P

F2 - Processing parameters
SI         4096
SF         600.1300005 MHz
WDW        EM
SSB        0
GB         0 Hz
PC         1.40

F1 - Processing parameters
SI         4096
MC2        0
SF         150.9028799 MHz
WDW        EM
SSB        2
GB         0 Hz
PC         0

```

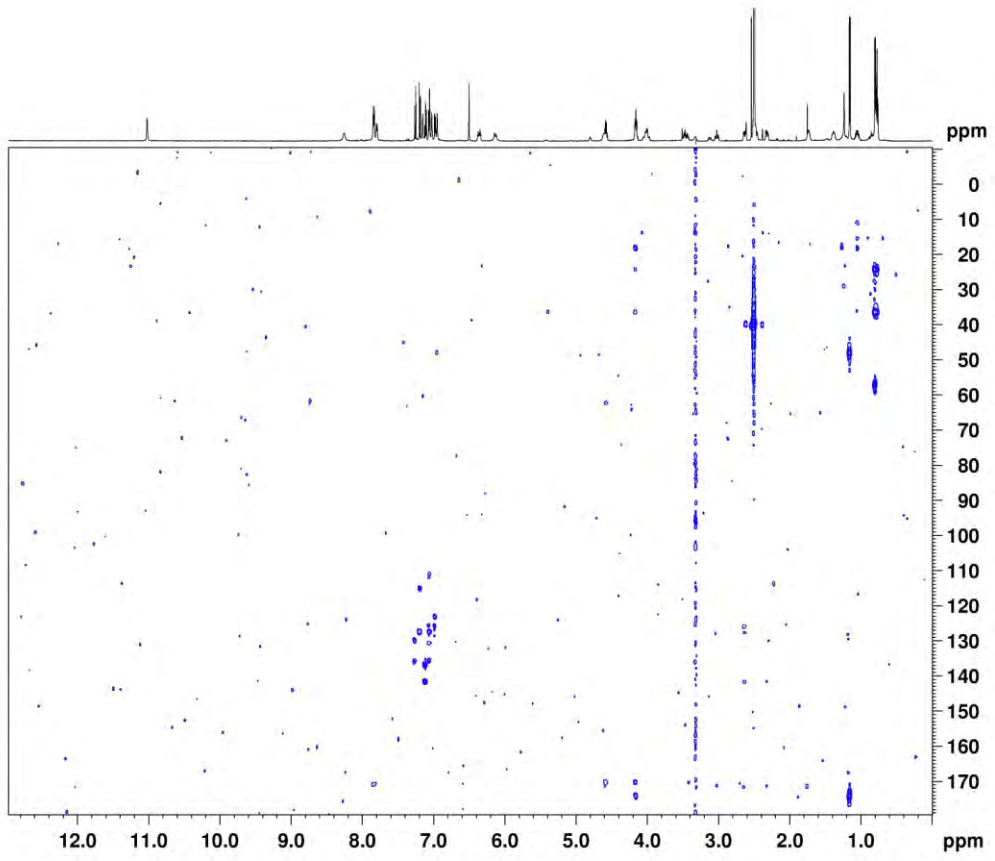

Macrocyclic Product 17c

```

Current Data Parameters
NAME      BC-III-153D2
EXPNO    3
PROCNO   1

F2 - Acquisition Parameters
Date_    20150721
Time     20.42
INSTRUM  av600
PROBHD   5 mm TBI5
PULPROG  zgpr
TD       65536
SOLVENT  DMSO
NS       17
DS       0
SWH      12376.237 Hz
FIDRES   0.188846 Hz
AQ       2.6477044 sec
RG       114
DW       40.400 usec
DE       6.50 usec
TE       298.0 K
D1       2.00000000 sec
D12      0.00002000 sec
TD0      1
    
```

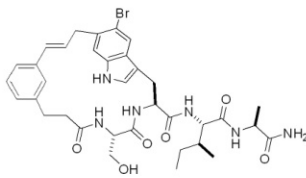

```

===== CHANNEL f1 =====
NUC1     1H
P1       10.75 usec
PL1      -2.00 dB
PL9      51.36 dB
PL1W     39.81071854 W
PL9W     0.00018365 W
SFO1     600.1320056 MHz

F2 - Processing parameters
SI       65536
SF       600.1300077 MHz
WDW      EM
SSB      0
LB       0.30 Hz
GB       0
PC       1.00
    
```

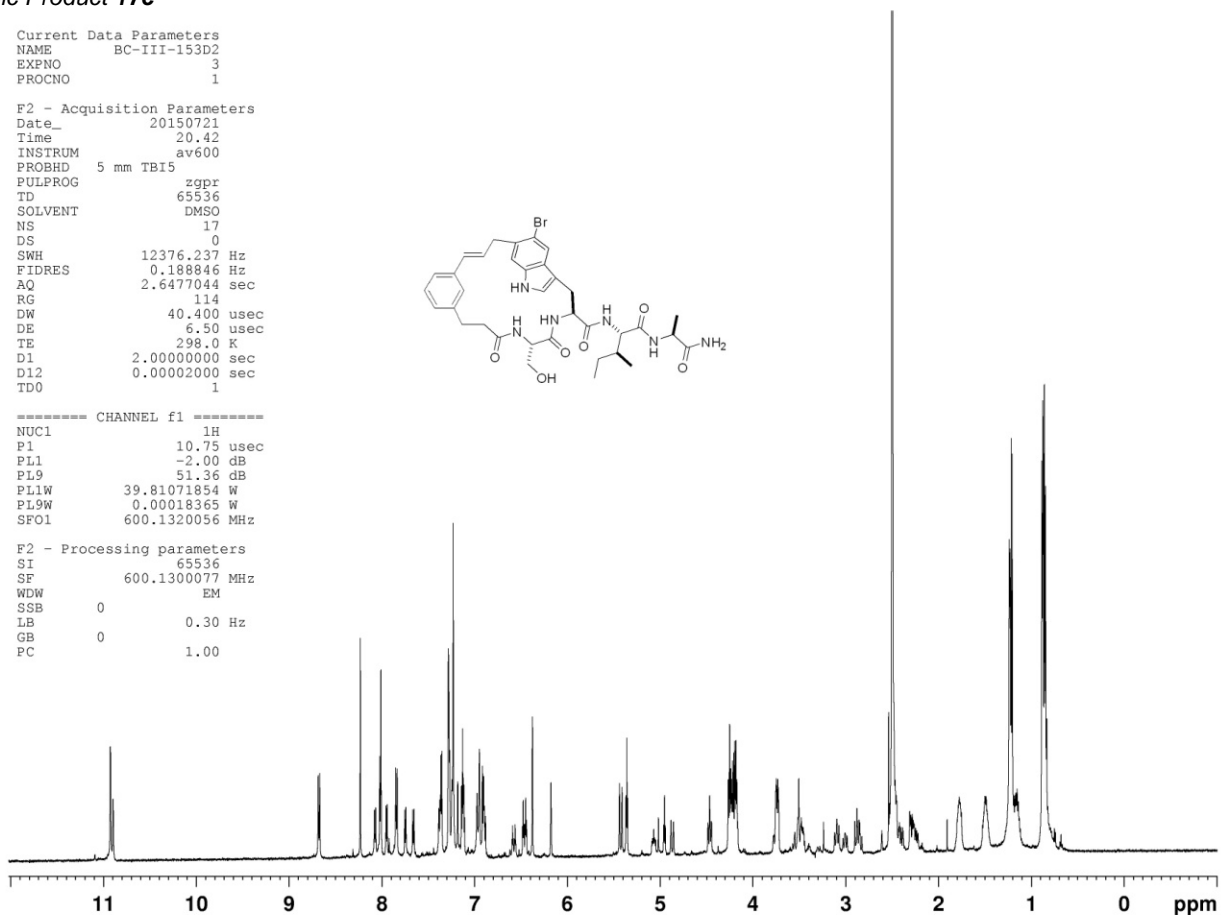

```

Current Data Parameters
NAME      BC-III-153D2
EXPNO    3
PROCNO   1

F2 - Acquisition Parameters
Date_    20150721
Time     20.43
INSTRUM  av600
PROBHD   5 mm TBI5
PULPROG  zgpr
TD       65536
SOLVENT  DMSO
NS       16
DS       1
SWH      7183.908 Hz
FIDRES   3.507768 Hz
AQ       0.1425908 sec
RG       456.1
DW       69.600 usec
DE       6.50 usec
TE       298.0 K
D0       0.00002000 sec
D1       1.00000000 sec
D11      0.00000000 sec
D12      0.00002000 sec
D16      0.00020000 sec
TD0      0.00013920 sec
    
```

```

===== CHANNEL f1 =====
NUC1     1H
P0       8.00 usec
P1       10.75 usec
PL1      -2.00 dB
PL9      120.00 dB
PL1W     39.81071854 W
PL9W     0 W
SFO1     600.1336008 MHz
    
```

```

===== GRADIENT CHANNEL =====
GPNAM1   0 * SINE.100
GPV1     0 *
GPV2     0 *
GPZ1     10.00 *
P16      1000.00 usec
    
```

```

F1 - Acquisition parameters
TD       512
SFO1     600.1300083 MHz
FIDRES   14.031077 Hz
SW       11.971 ppm
FhMODE   QF
    
```

```

F2 - Processing parameters
SI       4096
SF       600.1300064 MHz
WDW      QSINE
SSB      1.5
LB       0 Hz
GB       0
PC       1.00
    
```

```

F1 - Processing parameters
SI       4096
MC2      QF
SF       600.1300064 MHz
WDW      QSINE
SSB      1.5
LB       0 Hz
GB       0
    
```

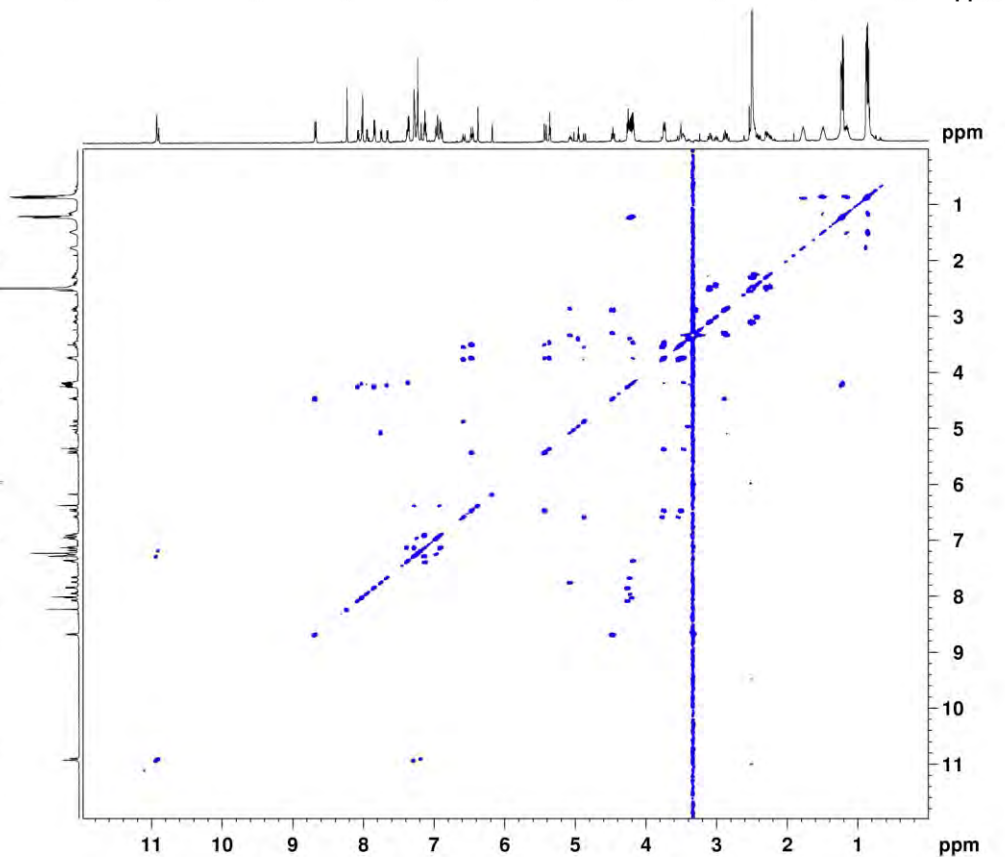



```

Current Data Parameters
NAME BC-111-15302
EXPNO 7
PROCNO 1

F2 - Acquisition Parameters
Date_ 20150721
Time 21.04
INSTRUM mv600
PROBHD 5 mm TMS
PULPROG mgzgpgph
ID 2048
SOLVENT DMSO
NS 7
DS 16
SWH 7789.162 Hz
FIDRES 3.802814 Hz
AQ 0.1315316 sec
RG 1425.5
DM 64.200 usec
DE 6.50 usec
TE 298.2 K
D0 0.00002736 sec
D1 1.00000000 sec
D2 0.06000000 sec
D12 0.00002000 sec
D16 0.00020000 sec
LNO 0.00012840 sec
LI 24

```

```

----- CHANNEL f1 -----
NUC1 13C
P1 10.75 usec
P2 21.50 usec
P3 26.48 usec
P6 40.00 usec
P7 60.00 usec
P12 3000.00 usec
P17 2500.00 usec
PL0 120.00 dB
PL1 -2.00 dB
PL10 9.41 dB
PL16 0 W
PL1W 39.81071954 W
PL1W 2.4723849 W
SFO1 600.133908 MHz
SFO2 120.00 MHz
RFNAME1 Sqa100.1000
SFOAL1 1.000
SFOFFS1 -1346.44 Hz

```

```

----- GRADIENT CHANNEL -----
GPMAX1 SINE.100
GPMAX2 SINE.100
GPX1 0 %
GPX2 0 %
GPY1 0 %
GPY2 0 %
GPI1 31.00 %
GPI2 11.00 %
P16 1000.00 usec

```

```

F1 - Acquisition parameters
ID 512
SFO1 600.133908 MHz
FIDRES 15.211276 Hz
SW 12.977 ppm
FREQ0 0 State=1091

```

```

F2 - Processing parameters
SI 4096
SF 600.1300667 MHz
WVW 60180
SSB 2
LB 0 Hz
GB 0
PC 1.00

```

```

F1 - Processing parameters
SI 4096
MC2 State=1091
SF 600.1300666 MHz
SSB 2
LB 0 Hz
GB 0

```

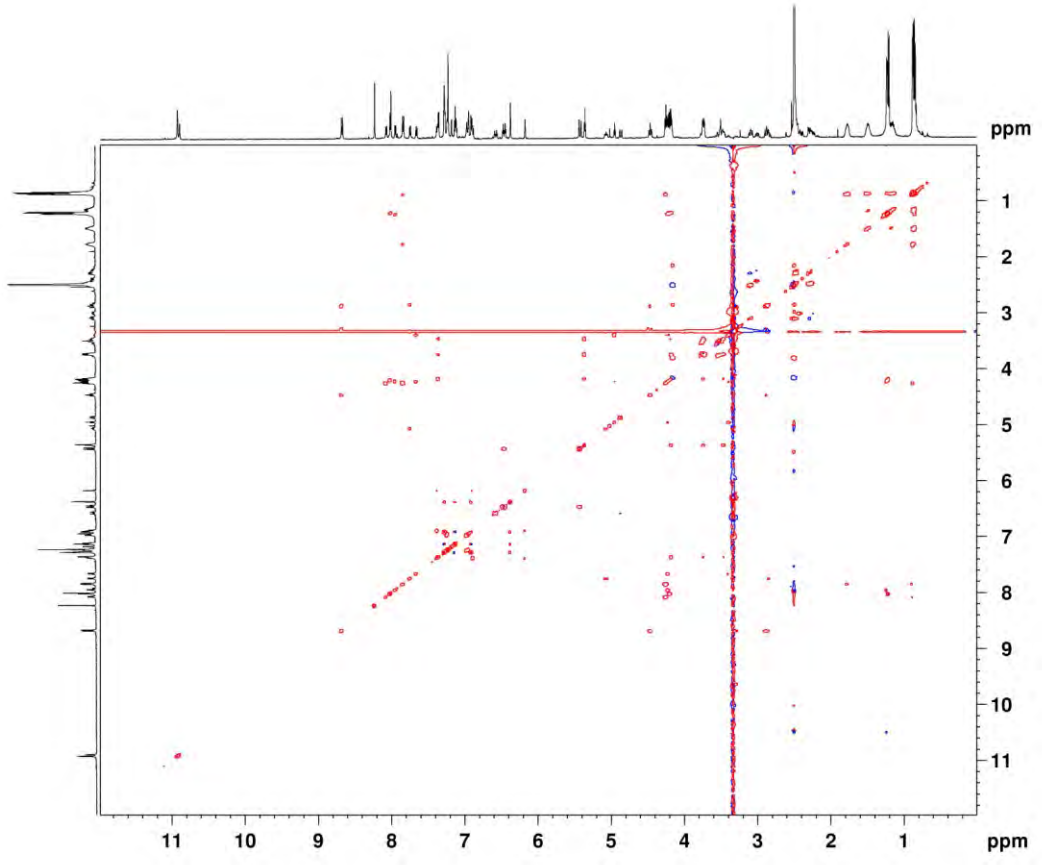

```

Current Data Parameters
NAME BC-111-15302
EXPNO 7
PROCNO 1

F2 - Acquisition Parameters
Date_ 20150721
Time 21.14
INSTRUM mv600
PROBHD 5 mm TMS
PULPROG mgzgpgph
ID 2048
SOLVENT DMSO
NS 7
DS 16
SWH 7789.162 Hz
FIDRES 3.802814 Hz
AQ 0.1315316 sec
RG 1425.5
DM 64.200 usec
DE 6.50 usec
TE 298.2 K
D0 0.00002736 sec
D1 1.00000000 sec
D2 0.06000000 sec
D12 0.00002000 sec
D16 0.00020000 sec
LNO 0.00012840 sec
LI 24

```

```

----- CHANNEL f1 -----
NUC1 13C
P1 10.75 usec
P2 21.50 usec
P3 26.48 usec
P6 40.00 usec
P7 60.00 usec
P12 3000.00 usec
P17 2500.00 usec
PL0 120.00 dB
PL1 -2.00 dB
PL10 9.41 dB
PL16 0 W
PL1W 39.81071954 W
PL1W 2.4723849 W
SFO1 600.133908 MHz
SFO2 120.00 MHz
RFNAME1 Sqa100.1000
SFOAL1 1.000
SFOFFS1 -1346.44 Hz

```

```

----- GRADIENT CHANNEL -----
GPMAX1 SINE.100
GPMAX2 SINE.100
GPX1 0 %
GPX2 0 %
GPY1 0 %
GPY2 0 %
GPI1 31.00 %
GPI2 11.00 %
P16 1000.00 usec

```

```

F1 - Acquisition parameters
ID 512
SFO1 600.133908 MHz
FIDRES 15.211276 Hz
SW 12.977 ppm
FREQ0 0 State=1091

```

```

F2 - Processing parameters
SI 4096
SF 600.1300667 MHz
WVW 60180
SSB 2
LB 0 Hz
GB 0
PC 1.40

```

```

F1 - Processing parameters
SI 4096
MC2 State=1091
SF 600.1300666 MHz
SSB 2
LB 0 Hz
GB 0

```

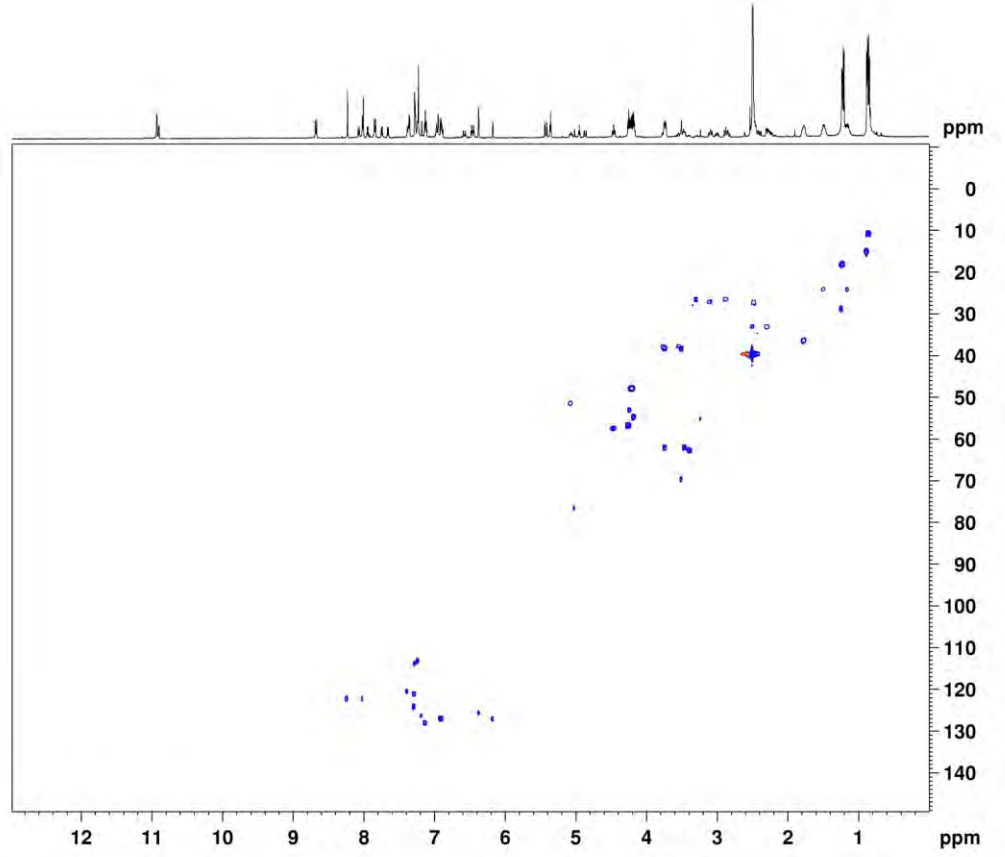

```

Current Data Parameters
NAME      ac-III-15302
EXFNO    9
PROCNO   1

F2 - Acquisition Parameters
Date_    20150721
Time     23.46
INSTRUM  spect
PROBHD   5 mm TMS
PULPROG  zgpg30
TD        32
SOLVENT  DMSO
NS        32
DS        16
SWH       7788.162 Hz
FIDRES   3.492814 Hz
AQ        0.1315316 sec
RG        24008
TW        64.200 usec
DE        6.00 usec
TE        297.4 K
CNSF2    145.0000000
CNSF3    7.0000000
DO        0.0000000 sec
DL        1.5000000 usec
DZ        0.00344828 sec
DF        0.07142857 sec
DLE      0.00020000 sec
LMO      0.00001745 sec

CHANNEL F1
NUC1      1H
P1        10.75 usec
P2        21.50 usec
PL1       -2.00 dB
PL12      19.8107184 W
SFO1      400.1399008 MHz

CHANNEL F2
NUC2      13C
P3        19.00 usec
P12       -3.00 dB
PL12      150.35417045 W
SFO2      100.62815353 MHz

GRADIENT CHANNEL
GPNAM1    SINE.100
GPNAM2    SINE.100
GPNAM3    SINE.100
GPX1      0 %
GPX2      0 %
GPX3      0 %
GPH1      0 %
GPH2      0 %
GPH3      0 %
GPE1      50.00 %
GPE2      30.00 %
GPE3      40.10 %
P16       1000.00 usec

F1 - Acquisition parameters
TD        256
SFO1      120.0158 MHz
FIDRES   112.007634 Hz
SWH       190.000 ppm
SFO2      0

F2 - Processing parameters
SI        4096
SF        600.1300107 MHz
WDW       EM
SSB       0 Hz
LB        0 Hz
GB        0
PC        1.40

F1 - Processing parameters
SI        4096
SF        120.015830 MHz
WDW       EM
SSB       0 Hz
LB        0 Hz
GB        0

```

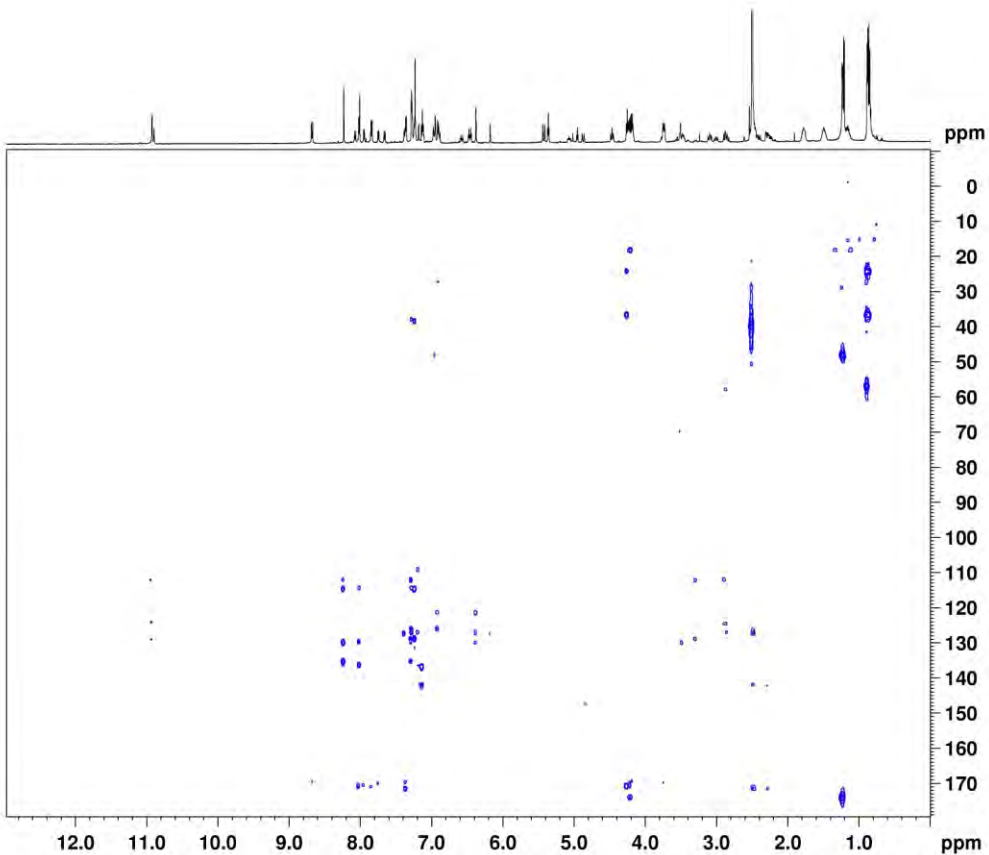

Macrocyclic Product 17d

```

Current Data Parameters
NAME      BC-III-153F
EXPNO    2
PROCNO    1

F2 - Acquisition Parameters
Date_     20150510
Time      16.46
INSTRUM   av600
PROBHD    5 mm TBI5
PULPROG   zgpr
TD         65536
SOLVENT   DMSO
NS         16
DS         0
SWH        12376.237 Hz
FIDRES     0.188846 Hz
AQ         2.6477044 sec
RG         90.5
DW         40.400 usec
DE         6.50 usec
TE         298.0 K
D1         2.00000000 sec
D12        0.00002000 sec
TD0        1
    
```

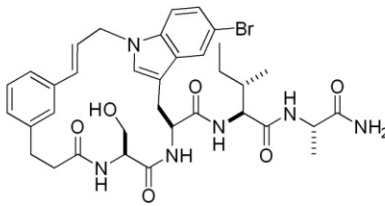

```

===== CHANNEL f1 =====
NUC1      1H
P1        10.70 usec
PL1       -2.00 dB
PL9       51.15 dB
PL1W      39.81071854 W
PL9W      0.00019275 W
SF01      600.1336008 MHz

F2 - Processing parameters
SI         65536
SF         600.1300071 MHz
WDW        EM
SSB        0
LB         0.30 Hz
GB         0
PC         1.00
    
```

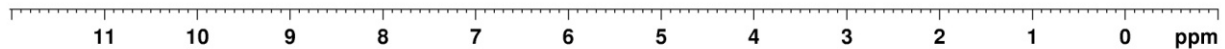

```

Current Data Parameters
NAME      BC-III-153F
EXPNO    1
PROCNO    1
    
```

```

F2 - Acquisition Parameters
Date_     20150510
Time      16.52
INSTRUM   av600
PROBHD    5 mm TBI5
PULPROG   cosygpprgf
TD         2048
SOLVENT   DMSO
NS         2
DS         16
SWH        7183.908 Hz
FIDRES     3.507768 Hz
AQ         0.1425908 sec
RG         362
DW         65.600 usec
DE         6.50 usec
TE         298.0 K
D0         0.00000000 sec
D1         1.00000000 sec
D11        0.03000000 sec
D12        0.00002000 sec
D16        0.00002000 sec
INO        0.00013920 sec
    
```

```

===== CHANNEL f1 =====
NUC1      1H
P0         8.00 usec
P1        10.70 usec
PL1       -2.00 dB
PL9       120.00 dB
PL1W      39.81071854 W
PL9W      0 W
SF01      600.1336008 MHz
    
```

```

===== GRADIENT CHANNEL =====
GPHAM1    SINE.100
GPX1      0 %
GPF1      0 %
GPF2      10.00 %
P16       1000.00 usec
    
```

```

F1 - Acquisition parameters
TD         512
SF01      600.1336 MHz
FIDRES     14.031077 Hz
SW         11.971 ppm
F2MODE     OF
    
```

```

F2 - Processing parameters
SI         4096
SF         600.1300052 MHz
WDW        QSINE
SSB        1.5
LB         0 Hz
GB         0
PC         1.00
    
```

```

F1 - Processing parameters
SI         4096
MC2        OF
SF         600.1300052 MHz
WDW        QSINE
SSB        1.5
LB         0 Hz
GB         0
    
```

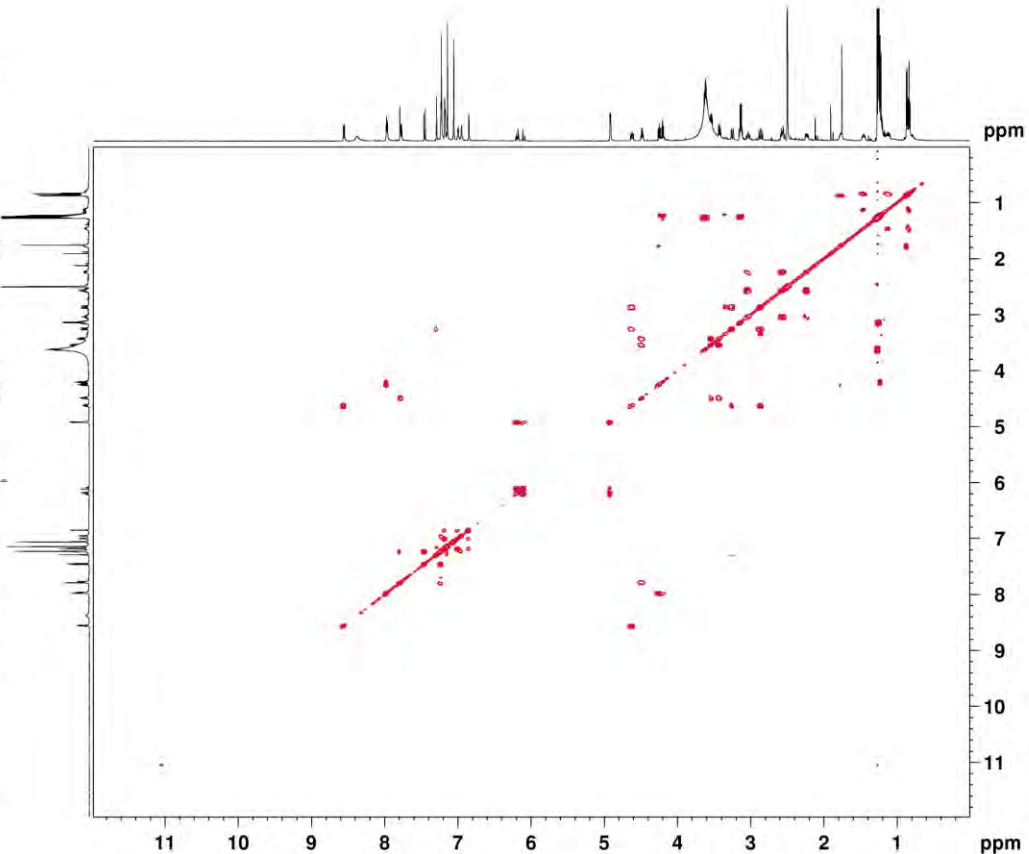



```

Current User Parameters
NAME BC-III-1535
EXTNO 8
PROCNO 1

F2 - Acquisition Parameters
Date_ 20150510
Time 17:55
INSTRUM spect
PROBHD 5 mm FHS
PULPROG zgpg30
TD 2048
SOLVENT dmso
NS 12
DS 16
SWH 7788.182 Hz
FIDRES 3.802814 Hz
AQ 0.1312314 sec
RG 24008
SM 64.200 usec
SF 600.136000 usec
TE 297.2 K
CNS13 145.000000
CNS14 7.000000
SD 0.00000300 sec
S1 1.50000000 sec
S2 0.00344828 sec
S3 0.0142893 sec
S4 0.00200000 sec
S5 0.0000745 sec
S6 0.0000745 sec

CHANNEL F1
NUC1 1H
P1 10.70 usec
PC 21.80 usec
PL1 -2.00 dB
PL12 39.81071834 W
SFO1 600.1339008 MHz

CHANNEL F2
NUC2 13C
P3 19.50 usec
PC 3.00 dB
PL3 150.95817065 W
SFO2 150.9156957 MHz

GRADIENT CHANNEL
GPM1 SINE.100
GPM2 SINE.100
GPNMS
GPK 0 %
GPK2 0 %
GPK3 0 %
GPK4 0 %
GPK5 0 %
GPK6 0 %
GPK7 0 %
GPK8 0 %
GPK9 0 %
GPK10 0 %
GPK11 0 %
GPK12 0 %
GPK13 0 %
GPK14 0 %
GPK15 0 %
GPK16 0 %
GPK17 0 %
GPK18 0 %
GPK19 0 %
GPK20 0 %
GPK21 50.00 %
GPK22 30.00 %
GPK23 40.10 %
GPK24 1000.00 usec

F1 - Acquisition parameters
TD 2048
SFO1 150.9156 MHz
FIDRES 112.007636 Hz
SW 150.000 ppm
PRMODE OF

F2 - Processing parameters
SI 4096
SF 600.1300066 MHz
WDW QZINE
SSB 0
GB 0 Hz
GC 1.40
SC

F1 - Processing parameters
SI 4096
SF 600.1300066 MHz
WDW QZINE
SSB 0
GB 0

```

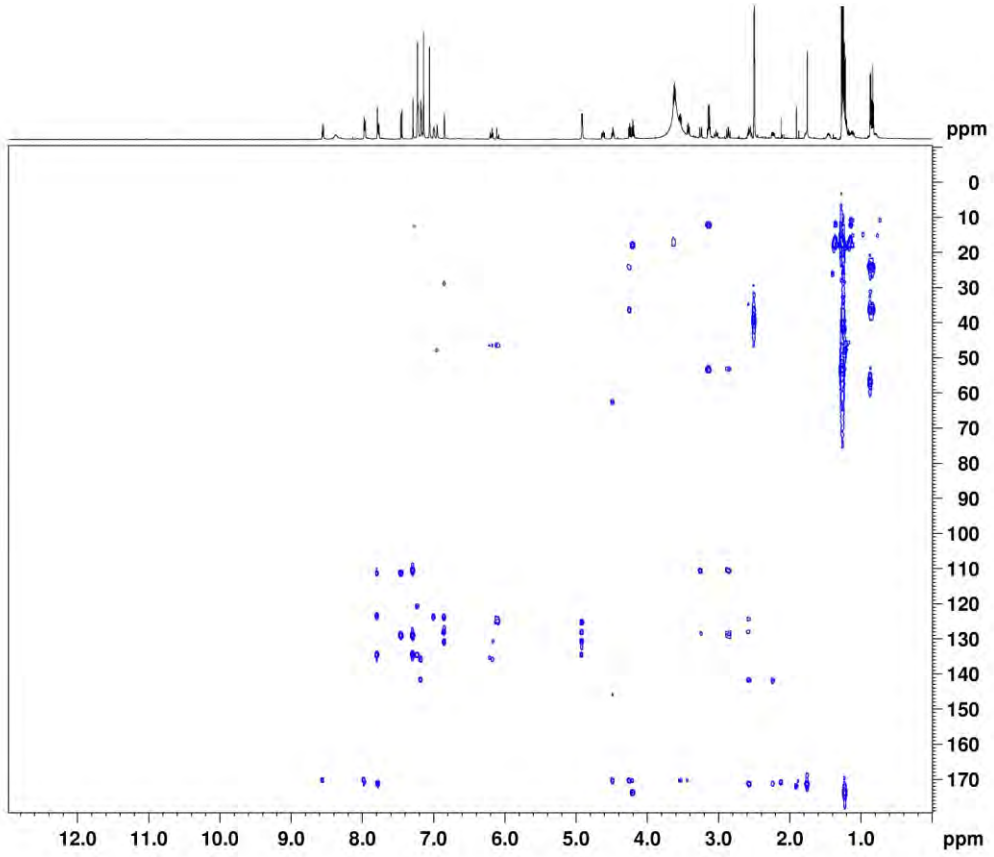

Macroyclic Product 17e

```

Current Data Parameters
NAME      BC-III-153_G
EXPNO    1
PROCNO   1

F2 - Acquisition Parameters
Date_    20150301
Time     15.25
INSTRUM  av500
PROBHD   5 mm DCH 13C-1
PULPROG  zg
TD       65536
SOLVENT  DMSO
NS       8
DS       0
SWH      10000.000 Hz
FIDRES   0.152588 Hz
AQ       3.2768500 sec
RG       12.14
DW       50.000 usec
DE       10.00 usec
TE       298.0 K
D1       2.00000000 sec
TD0      1
  
```

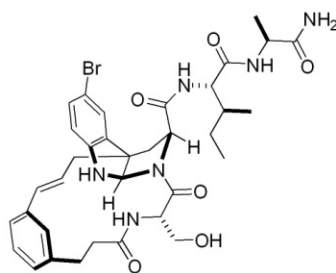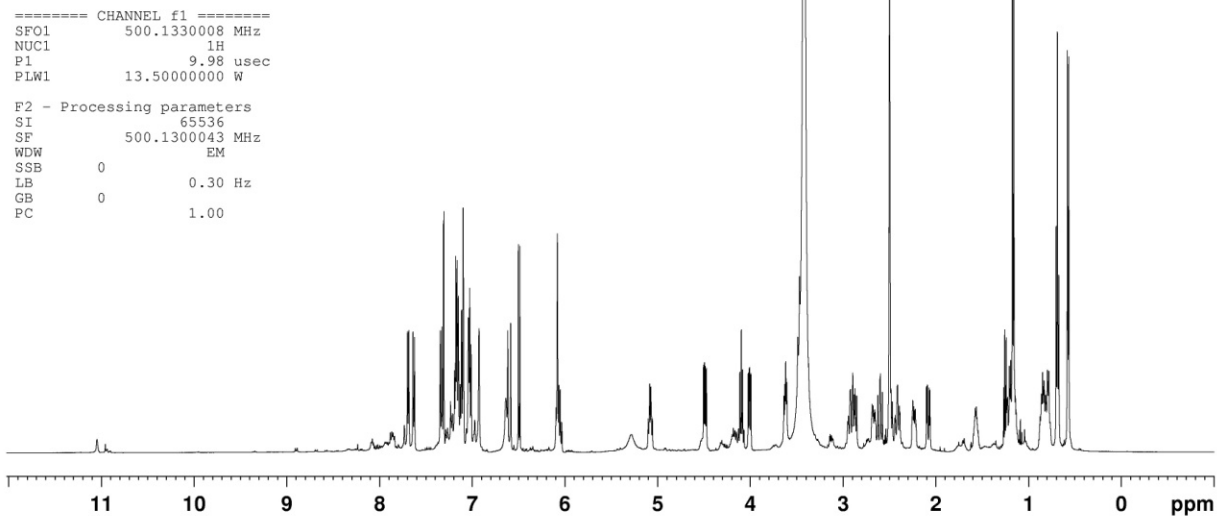

```

Current Data Parameters
NAME      BC-III-153_G
EXPNO    2
PROCNO   1
  
```

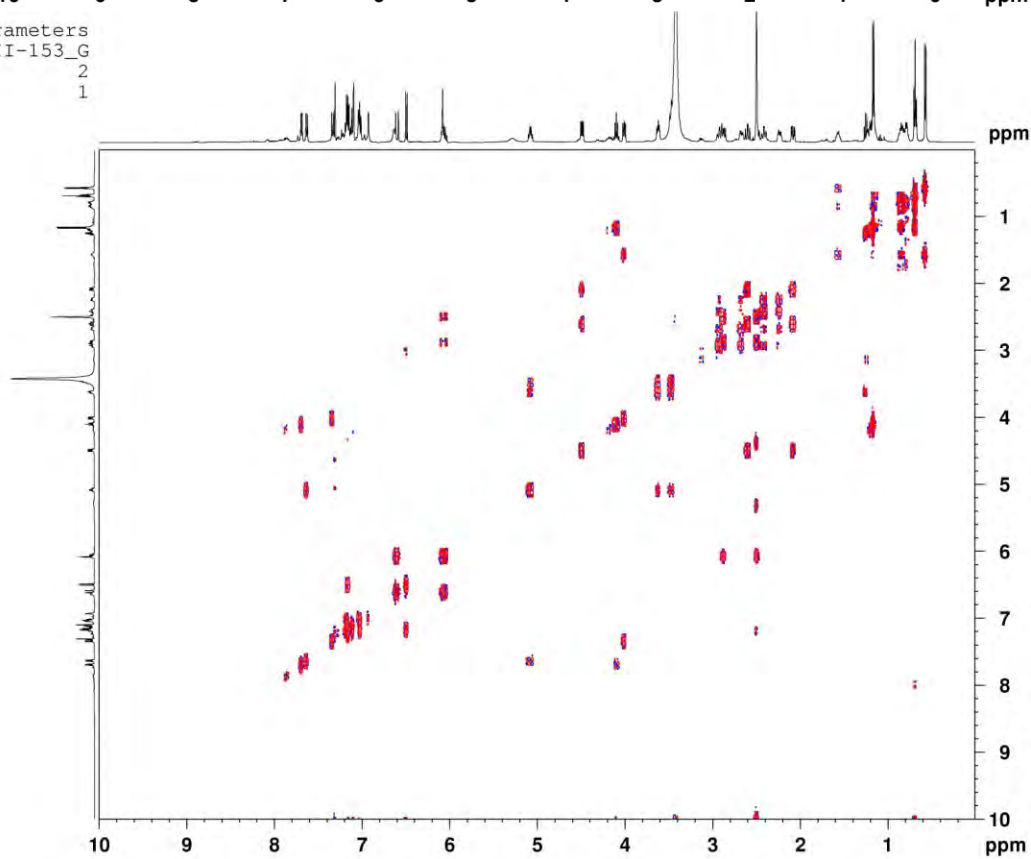

Current Data Parameters  
NAME BC-III-153\_G  
EXPNO 3  
PROCNO 1

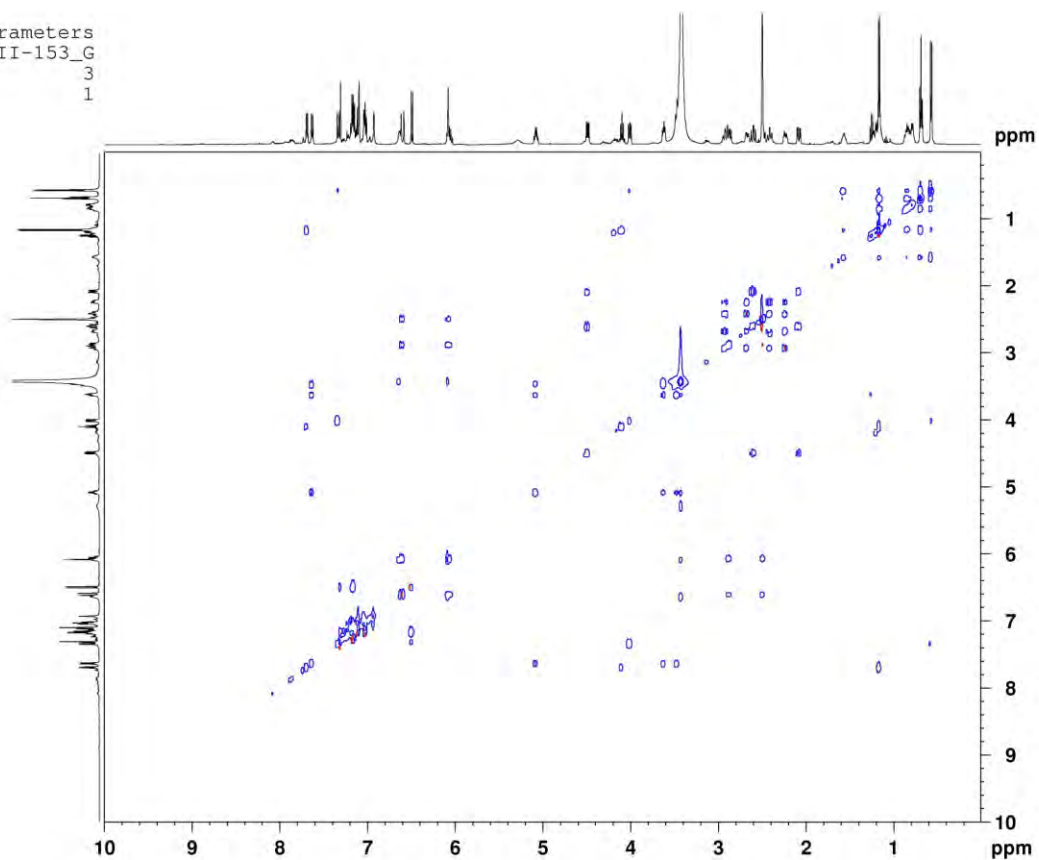

Current Data Parameters  
NAME BC-III-153\_G  
EXPNO 4  
PROCNO 1

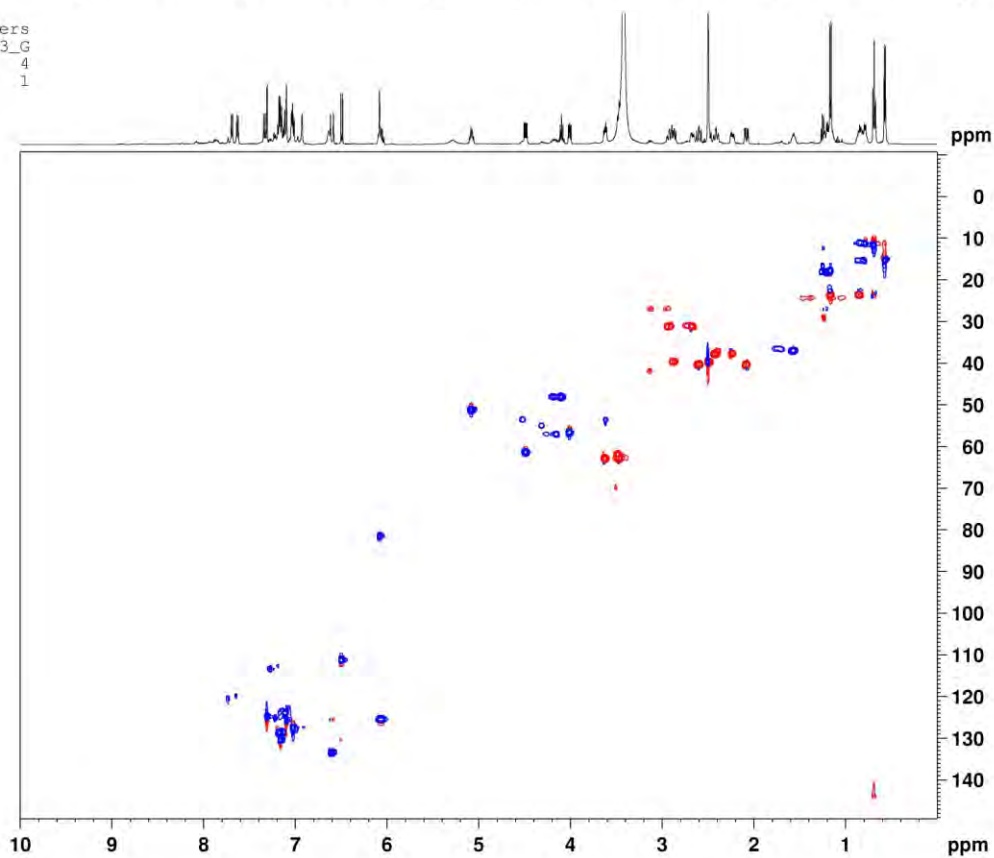

Current Data Parameters  
NAME BC-III-153\_G  
EXPNO 5  
PROCNO 1

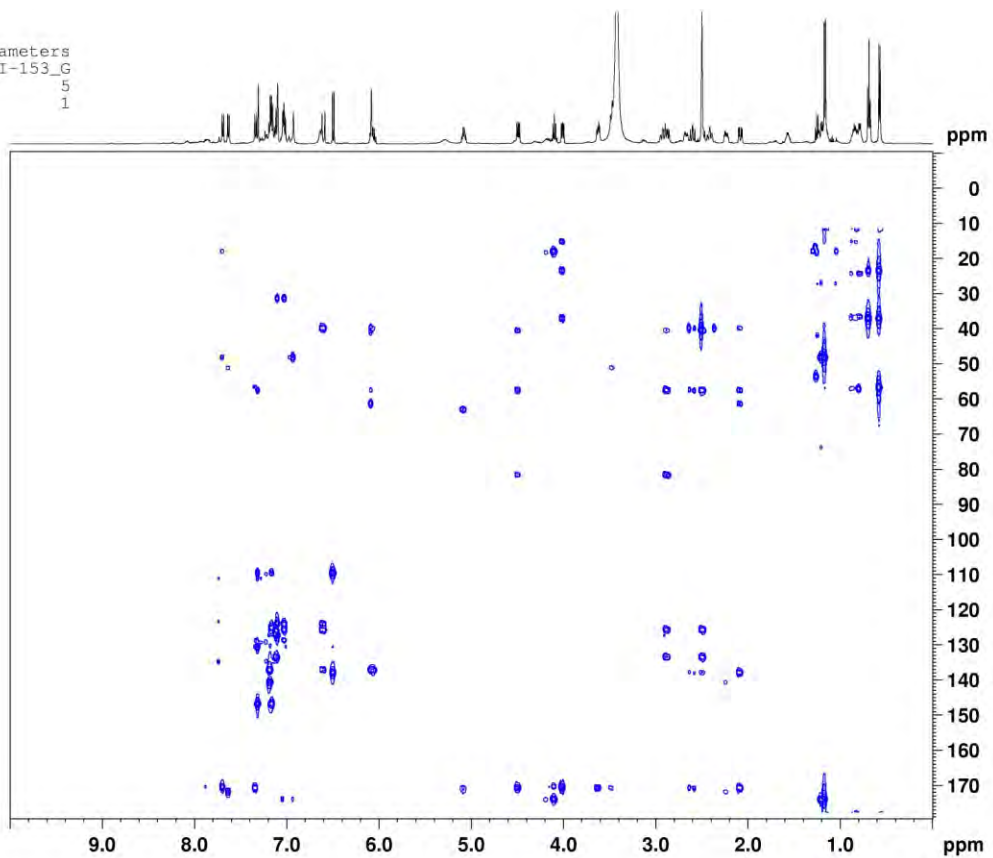



Acyclic Precursor 14

Current Data Parameters  
 NAME KL-5-104  
 EXPNO 1  
 PROCNO 1

F2 - Acquisition Parameters  
 Date\_ 20121218  
 Time 10.45  
 INSTRUM av500  
 PROBHD 5 mm DCH 13C-1  
 PULPROG zg30  
 TD 65536  
 SOLVENT DMSO  
 NS 8  
 DS 0  
 SWH 10000.000 Hz  
 FIDRES 0.152588 Hz  
 AQ 3.2767999 sec  
 RG 11  
 DW 50.000 usec  
 DE 10.00 usec  
 TE 298.0 K  
 D1 2.0000000 sec  
 TDO 1

===== CHANNEL f1 =====  
 SFO1 500.1330008 MHz  
 NUC1 1H  
 P1 10.00 usec  
 PLW1 13.5000000 W

F2 - Processing parameters  
 SI 65536  
 SF 500.1300146 MHz  
 WDW EM  
 SSB 0  
 LB 0.30 Hz  
 GB 0  
 PC 1.40

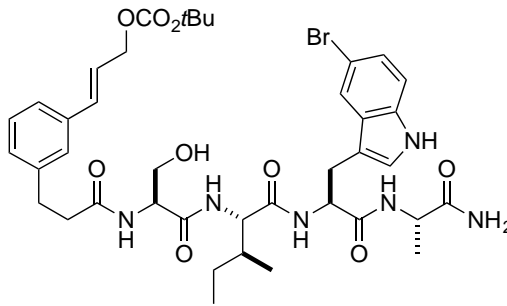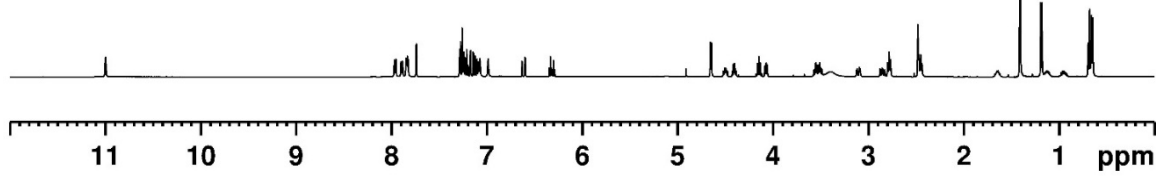

174.44  
 172.09  
 171.27  
 171.25  
 171.17

153.28  
 142.19  
 136.31  
 135.24  
 133.92  
 129.50  
 129.09  
 128.51  
 126.90  
 125.97  
 124.70  
 123.75  
 121.15  
 113.73  
 111.50  
 110.26

81.99

67.38  
 62.18  
 58.05  
 55.02  
 53.63  
 48.67

37.07  
 36.73  
 31.42  
 27.85  
 27.78  
 27.60  
 24.33  
 18.59  
 15.65  
 11.72

Current Data Parameters  
 NAME KL-5-104  
 EXPNO 2  
 PROCNO 1

F2 - Acquisition Parameters  
 Date\_ 20121218  
 Time 10.48  
 INSTRUM av500  
 PROBHD 5 mm DCH 13C-1  
 PULPROG zgpg30  
 TD 65536  
 SOLVENT DMSO  
 NS 39  
 DS 2  
 SWH 31250.000 Hz  
 FIDRES 0.476837 Hz  
 AQ 1.0485760 sec  
 RG 202.91  
 DW 16.000 usec  
 DE 18.00 usec  
 TE 298.0 K  
 D1 2.0000000 sec  
 D11 0.0300000 sec  
 TDO 1

===== CHANNEL f1 =====  
 SFO1 125.7722511 MHz  
 NUC1 13C  
 P1 9.63 usec  
 PLW1 23.0000000 W

===== CHANNEL f2 =====  
 SFO2 500.1330008 MHz  
 NUC2 1H  
 CPDPRG[2] waltz16  
 PCPD2 80.00 usec  
 PLW2 13.5000000 W  
 PLW12 0.21094000 W

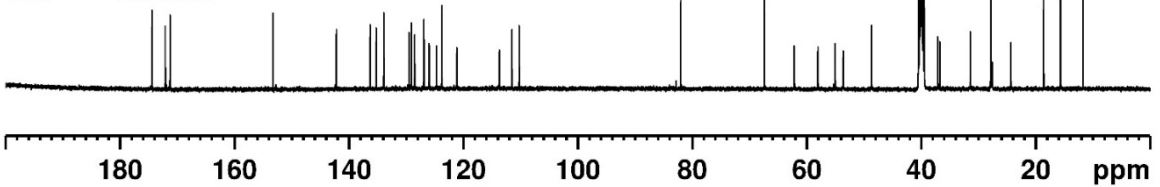

Macrocyclic Product 18a

```

Current Data Parameters
NAME      KL5-106-1-1
EXPNO    2
PROCNO   1

F2 - Acquisition Parameters
Date_    20121222
Time     11.16
INSTRUM av500
PROBHD   5 mm DCH 13C-1
PULPROG zg
TD       65536
SOLVENT  DMSO
NS       8
DS       0
SWH      10000.000 Hz
FIDRES   0.152588 Hz
AQ       3.2767999 sec
RG       11
DW       50.000 usec
DE       10.00 usec
TE       298.0 K
D1       2.0000000 sec
TD0      1
    
```

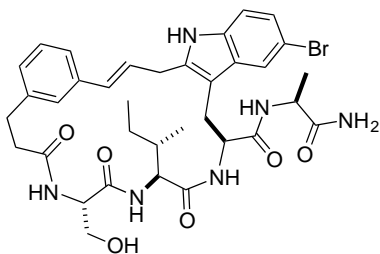

```

===== CHANNEL f1 =====
SFO1    500.1330008 MHz
NUC1    1H
P1      9.47 usec
PLW1    13.50000000 W
    
```

```

F2 - Processing parameters
SI      65536
SF      500.1300055 MHz
WDW     EM
SSB     0
LB      0.30 Hz
GB      0
PC      1.00
    
```

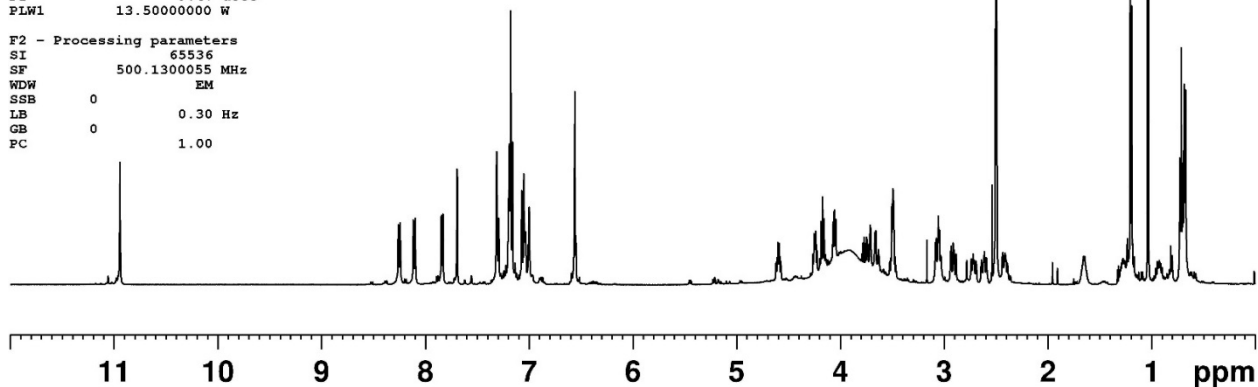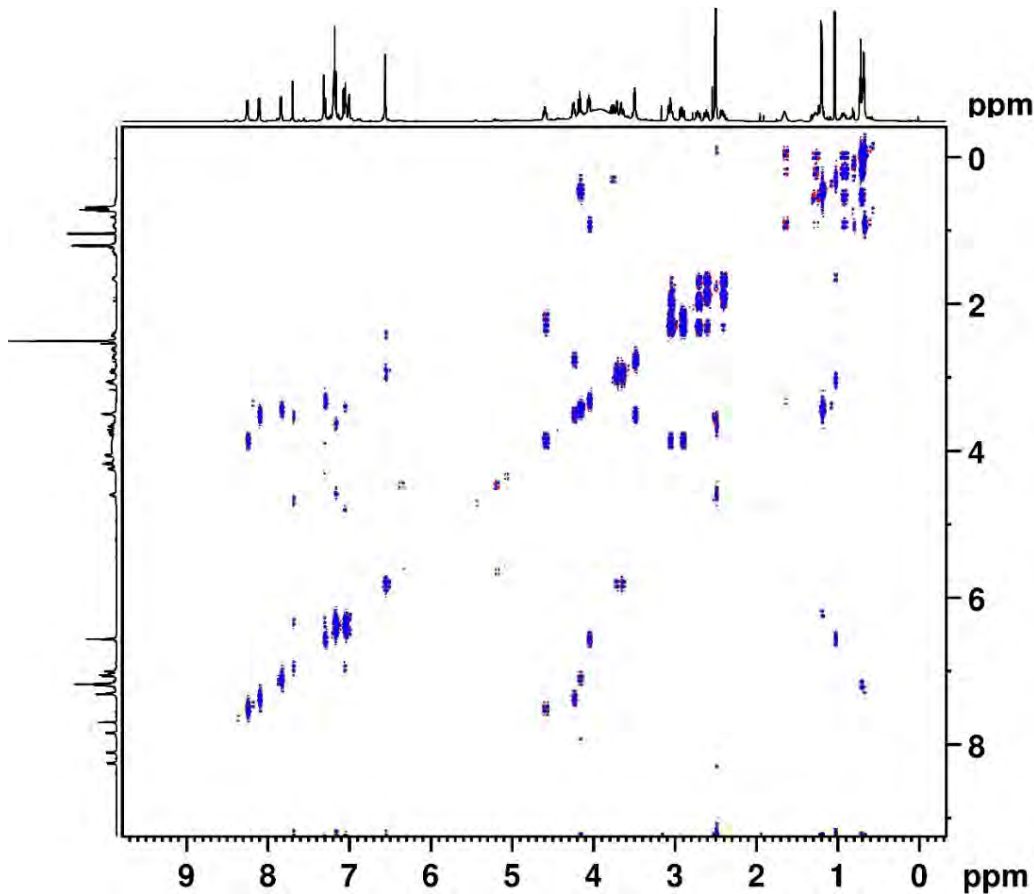

```

Current Data Parameters
NAME      KL5-106-1-1
EXPNO    3
PROCNO   1
    
```

```

F2 - Acquisition Parameters
Date_    20121222
Time     11.24
INSTRUM av500
PROBHD   5 mm DCH 13C-1
PULPROG cosygpmfph
TD       2048
SOLVENT  DMSO
NS       2
DS       8
SWH      5151.099 Hz
FIDRES   2.515185 Hz
AQ       0.1987925 sec
RG       11
DW       97.067 usec
DE       10.00 usec
TE       298.0 K
D0       0.00008504 sec
D1       1.50000000 sec
D13      0.00004000 sec
D16      0.00020000 sec
IN0      0.00019420 sec
    
```

```

===== CHANNEL f1 =====
SFO1    500.1324246 MHz
NUC1    1H
P1      9.47 usec
P2      18.94 usec
PLW1    13.50000000 W
    
```

```

===== GRADIENT CHANNEL =====
GPNAM[1] SMSQ10.100
GPNAM[2] SMSQ10.100
GPZ1    10.00 %
GPZ2    20.00 %
P16     1000.00 usec
    
```

```

F1 - Acquisition parameters
TD       256
SFO1    500.1324 MHz
FIDRES   20.114573 Hz
SW       10.296 ppm
FnMODE   States-TPPI
    
```

```

F2 - Processing parameters
SI       2048
SF       500.1300135 MHz
WDW     SINE
SSB     1
    
```

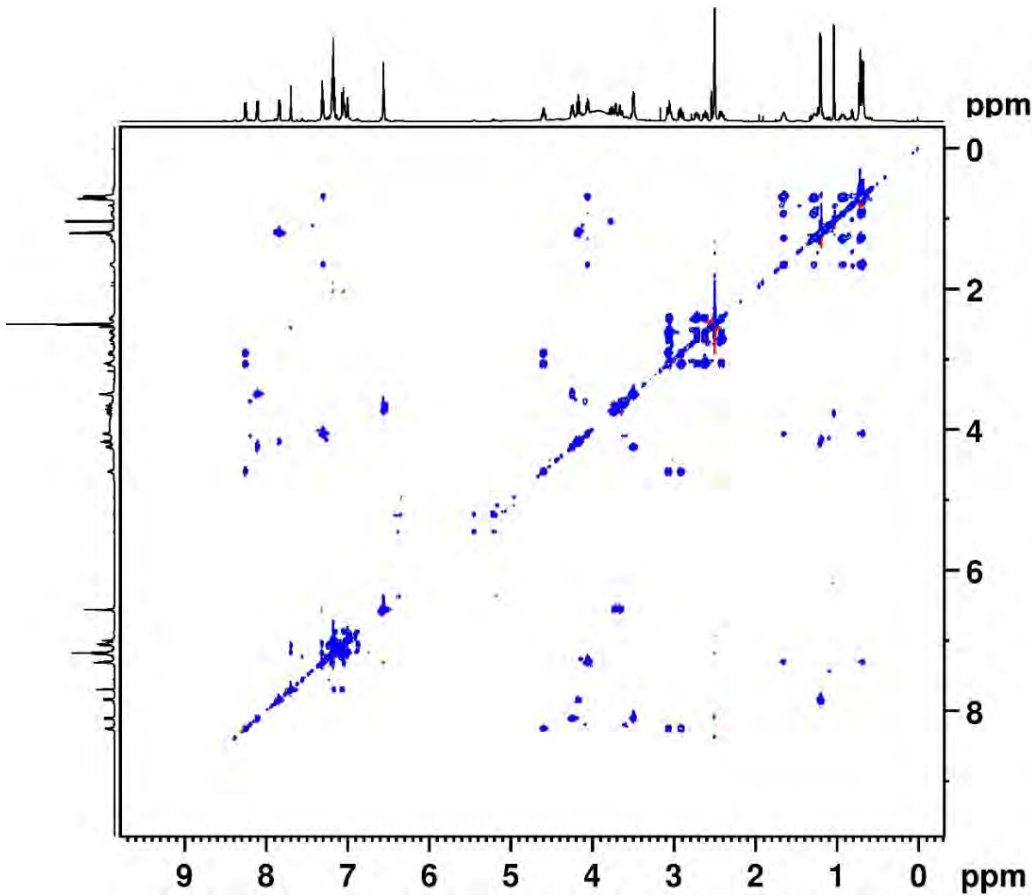

Current Data Parameters  
 NAME KL5-106-1-1  
 EXPNO 4  
 PROCNO 1

F2 - Acquisition Parameters  
 Date\_ 20121222  
 Time 11.39  
 INSTRUM av500  
 PROBHD 5 mm DCH 13C-1  
 PULPROG mlevetgp.js  
 TD 2048  
 SOLVENT DMSO  
 NS 2  
 DS 16  
 SWH 5151.099 Hz  
 FIDRES 2.515185 Hz  
 AQ 0.1987925 sec  
 RG 202.91  
 DW 97.067 usec  
 DE 10.00 usec  
 TE 298.0 K  
 D0 0.00000300 sec  
 D1 1.50000000 sec  
 D9 0.06000000 sec  
 D11 0.03000000 sec  
 D12 0.00002000 sec  
 D16 0.00020000 sec  
 INO 0.00019420 sec  
 L1 24

===== CHANNEL f1 =====  
 SFO1 500.1324246 MHz  
 NUC1 1H  
 P1 9.47 usec  
 P2 18.94 usec  
 P5 26.68 usec  
 P6 40.00 usec  
 P7 80.00 usec  
 P17 2500.00 usec  
 PLW1 13.50000000 W  
 PLW10 0.75683290 W

===== GRADIENT CHANNEL =====  
 GPNAM[1] SINE.100  
 GPNAM[2] SINE.100  
 GPZ1 30.00 %  
 GPZ2 30.00 %  
 P16 1000.00 usec

F1 - Acquisition parameters  
 TD 256  
 SFO1 500.1324 MHz  
 FIDRES 20.114573 Hz

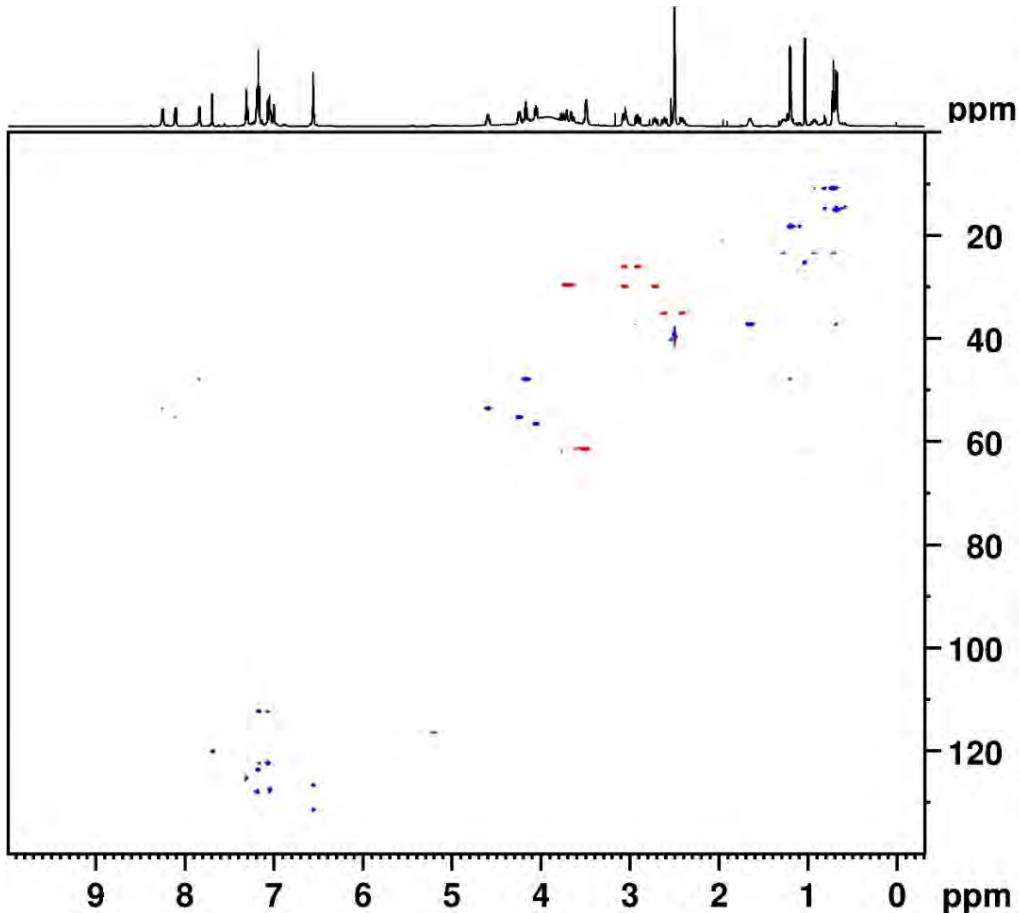

Current Data Parameters  
 NAME KL5-106-1-1  
 EXPNO 5  
 PROCNO 1

F2 - Acquisition Parameters  
 Date\_ 20121222  
 Time 11.55  
 INSTRUM av500  
 PROBHD 5 mm DCH 13C-1  
 PULPROG hsqcetgpsi  
 TD 2048  
 SOLVENT DMSO  
 NS 6  
 DS 16  
 SWH 5151.099 Hz  
 FIDRES 2.515185 Hz  
 AQ 0.1987925 sec  
 RG 202.91  
 DW 97.067 usec  
 DE 10.00 usec  
 TE 298.0 K  
 CNST2 145.00000000  
 D0 0.00000300 sec  
 D1 1.00000000 sec  
 D4 0.00172414 sec  
 D11 0.03000000 sec  
 D16 0.00020000 sec  
 D24 0.00345000 sec  
 INO 0.00002940 sec  
 ZGPTNS

===== CHANNEL f1 =====  
 SFO1 500.1324246 MHz  
 NUC1 1H  
 P1 9.47 usec  
 P2 18.94 usec  
 P28 0 usec  
 PLW1 13.50000000 W

===== CHANNEL f2 =====  
 SFO2 125.7675352 MHz  
 NUC2 13C  
 CPDPRG[2] gsrp  
 P3 9.63 usec  
 P4 19.26 usec  
 PCDP2 70.00 usec  
 PLW2 23.01399994 W  
 PLW12 0.43557000 W

===== GRADIENT CHANNEL =====  
 GPNAM[1] SMSQ10.100  
 GPNAM[2] SMSQ10.100  
 GPZ1 80.00 %  
 GPZ2 20.10 %

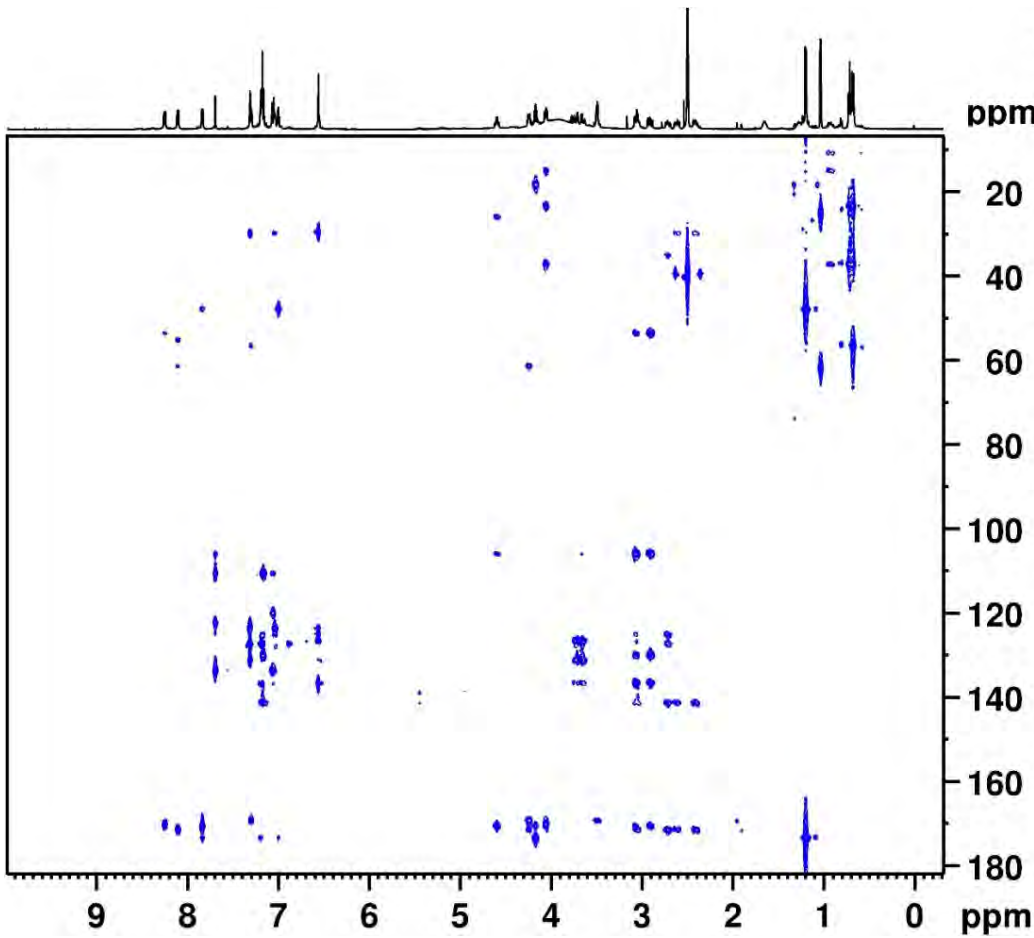

```

Current Data Parameters
NAME          KL5-106-1-1
EXPNO         6
PROCNO        1

F2 - Acquisition Parameters
Date_         20121222
Time          12.59
INSTRUM       av500
PROBHD        5 mm DCH 13C-1
PULPROG       hmbcgp12ndqf
TD            2048
SOLVENT       DMSO
NS            24
DS            16
SWH           5151.099 Hz
FIDRES        2.515185 Hz
AQ            0.1987925 sec
RG            202.91
DW            97.067 usec
DE            10.00 usec
TE            298.0 K
CNST6         120.0000000
CNST7         160.0000000
CNST13        7.0000000
D0            0.00000300 sec
D1            1.20000005 sec
D6            0.07142857 sec
D16           0.00020000 sec
IN0           0.00002270 sec

===== CHANNEL f1 =====
SFO1          500.1324246 MHz
NUC1           1H
P1             9.47 usec
P2            18.94 usec
PLW1          13.50000000 W

===== CHANNEL f2 =====
SFO2          125.7697360 MHz
NUC2           13C
P3             9.63 usec
PLW2          23.01399994 W

===== GRADIENT CHANNEL =====
GPNAM[1]      SMSQ10.100
GPNAM[2]      SMSQ10.100
GPNAM[3]      SMSQ10.100
GPNAM[4]      SMSQ10.100
GPNAM[5]      SMSQ10.100
GPNAM[6]      SMSQ10.100
GPZ1           50.00 %
GPZ2           30.00 %
GPZ3           40.10 %
GPZ4           15.00 %

```

Macrocyclic Product **18b**

```

Current Data Parameters
NAME      KL5-106-2-1_AV500
EXPNO    2
PROCNO   1

F2 - Acquisition Parameters
Date_    20121221
Time     18.07
INSTRUM  av500
PROBHD   5 mm DCH 13C-1
PULPROG  zg
TD        65536
SOLVENT  DMSO
NS        8
DS        0
SWH       10000.000 Hz
FIDRES   0.152588 Hz
AQ        3.2767999 sec
RG        11
DW        50.000 usec
DE        10.00 usec
TE        298.0 K
D1        2.0000000 sec
TD0       1
    
```

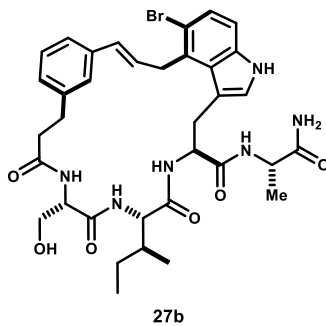

```

===== CHANNEL f1 =====
SFO1    500.1330008 MHz
NUC1     1H
P1       9.68 usec
PLW1    13.5000000 W

F2 - Processing parameters
SI        65536
SF        500.1300054 MHz
WDW       EM
SSB       0
LB        0.30 Hz
GB        0
PC        1.00
    
```

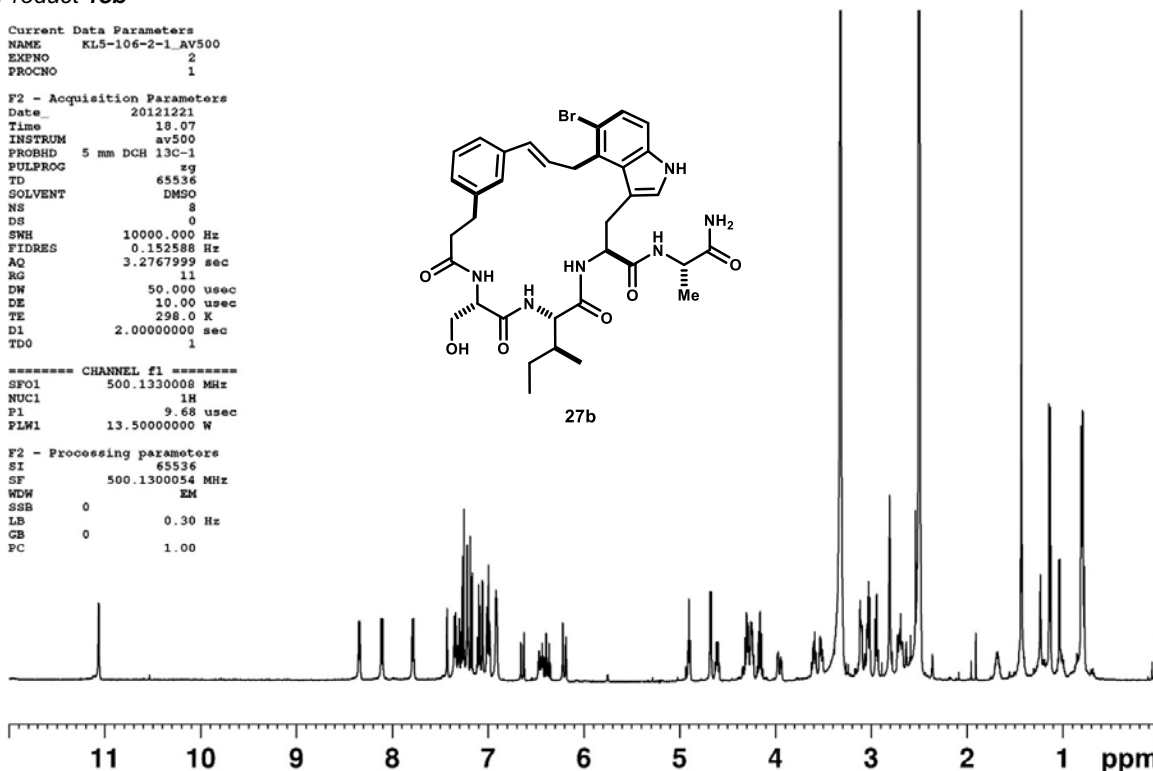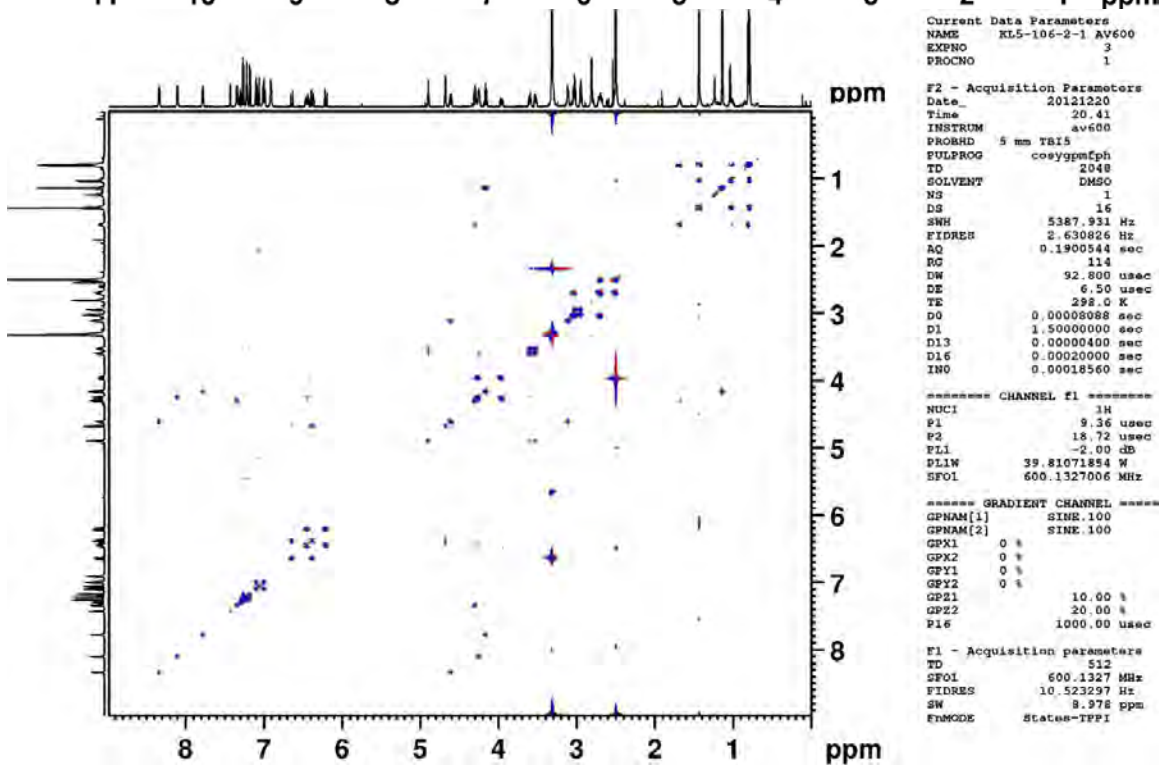

```

Current Data Parameters
NAME      KL5-106-2-1_AV600
EXPNO    3
PROCNO   1

F2 - Acquisition Parameters
Date_    20121220
Time     20.41
INSTRUM  av600
PROBHD   5 mm TR15
PULPROG  cosygpmph
TD        2048
SOLVENT  DMSO
NS        1
DS        16
SWH       5387.931 Hz
FIDRES   2.630826 Hz
AQ        0.1900544 sec
RG        114
DW        92.800 usec
DE        6.50 usec
TE        298.0 K
D0        0.00008088 sec
D1        1.5000000 sec
D13       0.00000400 sec
D16       0.00020000 sec
IN0       0.00018560 sec

===== CHANNEL f1 =====
NUC1     1H
P1       9.36 usec
P2       18.72 usec
PL1      -2.00 dB
PL12     39.81071854 W
SFO1    600.1327006 MHz

===== GRADIENT CHANNEL =====
GPNAM[1] SINE.100
GPNAM[2] SINE.100
GPX1     0 %
GPX2     0 %
GPY1     0 %
GPY2     0 %
GPZ1     10.00 %
GPZ2     20.00 %
P16      1000.00 usec

F1 - Acquisition parameters
TD        512
SFO1     600.1327 MHz
FIDRES   10.523297 Hz
SW        9.978 ppm
EN0MODE  Status-TPPI
    
```

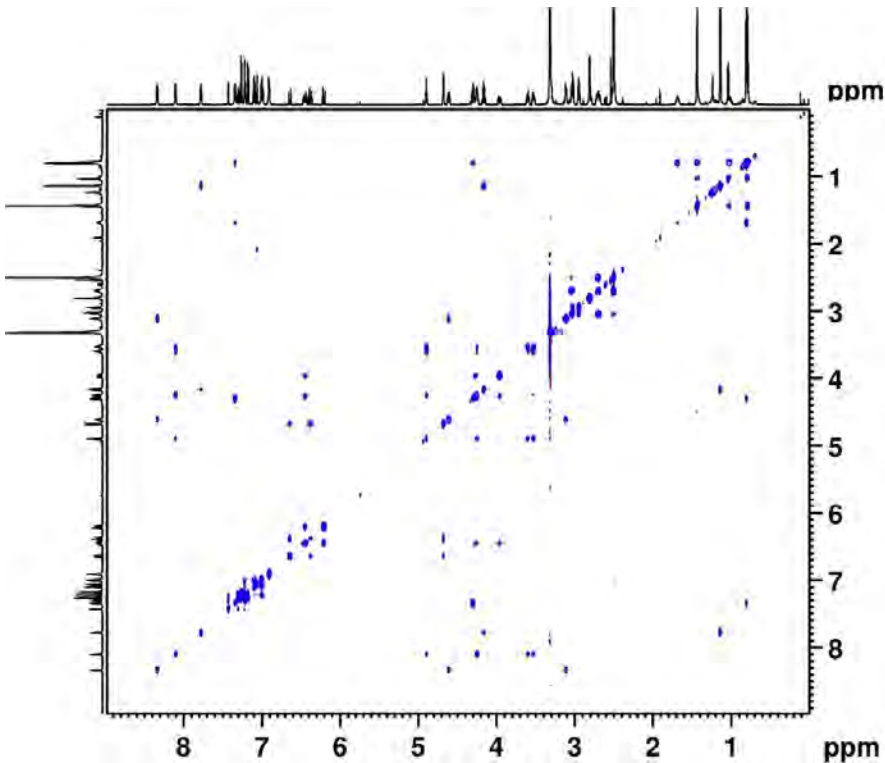

```

Current Data Parameters
NAME      KL5-106-2-1 AV600
EXPNO    4
PROCNO   1

F2 - Acquisition Parameters
Date_    20121220
Time     20.56
INSTRUM  av600
PROBHD   5 mm TBI5
PULPROG  dipol2etgpsi
TD        2048
SOLVENT  DMSO
NS        8
DS        16
SWH       5387.931 Hz
FIDRES   2.630826 Hz
AQ        0.1900544 sec
RG        362
DW        92.800 usec
DE        6.50 usec
TE        298.0 K
D0        0.0000300 sec
D1        1.5000000 sec
D9        0.0600000 sec
D11       0.0300000 sec
D16       0.0002000 sec
D20       0.0000100 sec
D21       0.0000100 sec
INO       0.00018560 sec
LI        14

***** CHANNEL f1 *****
NUC1      1H
P1        9.36 usec
P2        18.72 usec
P6        40.00 usec
PL1       -2.00 dB
PL10      10.62 dB
PL1W      39.81071854 W
PL1W2     2.17770982 W
SFO1      600.1327006 MHz

***** GRADIENT CHANNEL *****
GPNAM[1]  SINE.100
GPNAM[2]  SINE.100
GPX1      0 %
GPX2      0 %
GPY1      0 %
GPY2      0 %
GPE1      30.00 %
GPE2      30.00 %
P16       1000.00 usec
  
```

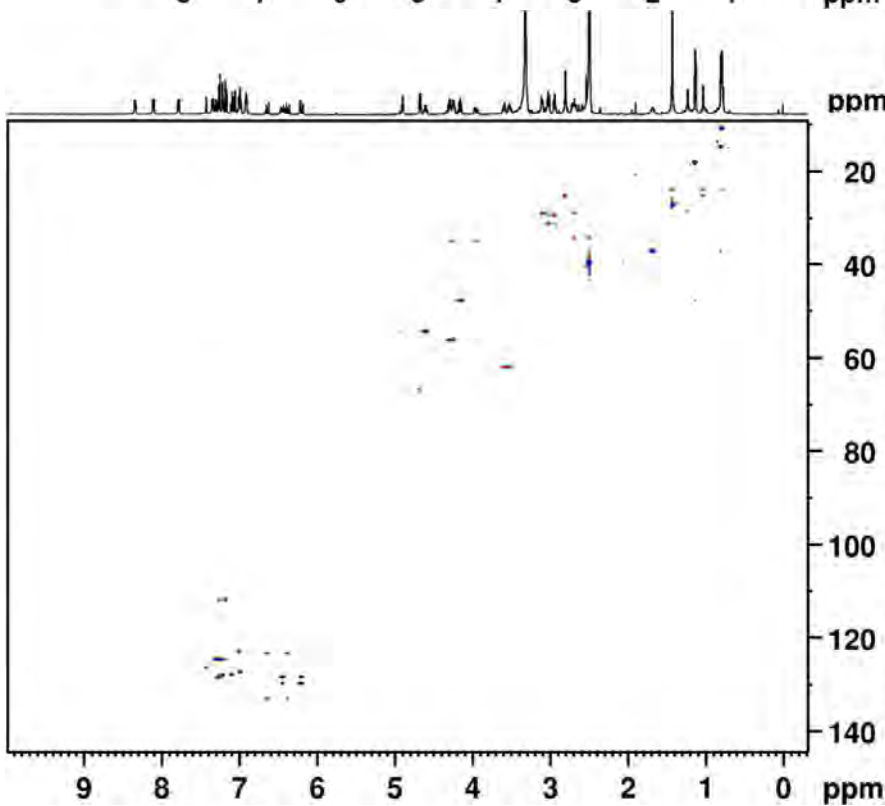

```

Current Data Parameters
NAME      KL5-106-2-1 AV500
EXPNO    5
PROCNO   1

F2 - Acquisition Parameters
Date_    20121221
Time     18.14
INSTRUM  av500
PROBHD   5 mm DCM 13C-1
PULPROG  hsqcetgpsi
TD        2048
SOLVENT  DMSO
NS        12
DS        16
SWH       5151.099 Hz
FIDRES   2.515185 Hz
AQ        0.1987925 sec
RG        202.91
DW        97.067 usec
DE        10.00 usec
TE        298.0 K
CNST2    145.0000000
D0        0.0000300 sec
D1        1.0000000 sec
D4        0.00172414 sec
D11       0.0300000 sec
D16       0.0002000 sec
D24       0.00345000 sec
INO       0.00002940 sec
ZGPGTNS

***** CHANNEL f1 *****
SFO1      500.1324246 MHz
NUC1      1H
P1        9.68 usec
P2        19.36 usec
P28       0 usec
PLW1      13.50000000 W

***** CHANNEL f2 *****
SFO2      125.7675352 MHz
NUC2      13C
CPDPRG[2] gexp
P3        9.63 usec
P4        19.26 usec
PCPD2     70.00 usec
PLW2      23.01399994 W
PLW12     0.43557000 W

***** GRADIENT CHANNEL *****
GPNAM[1]  SMSQ10.100
GPNAM[2]  SMSQ10.100
GPE1      80.00 %
GPE2      20.10 %
  
```

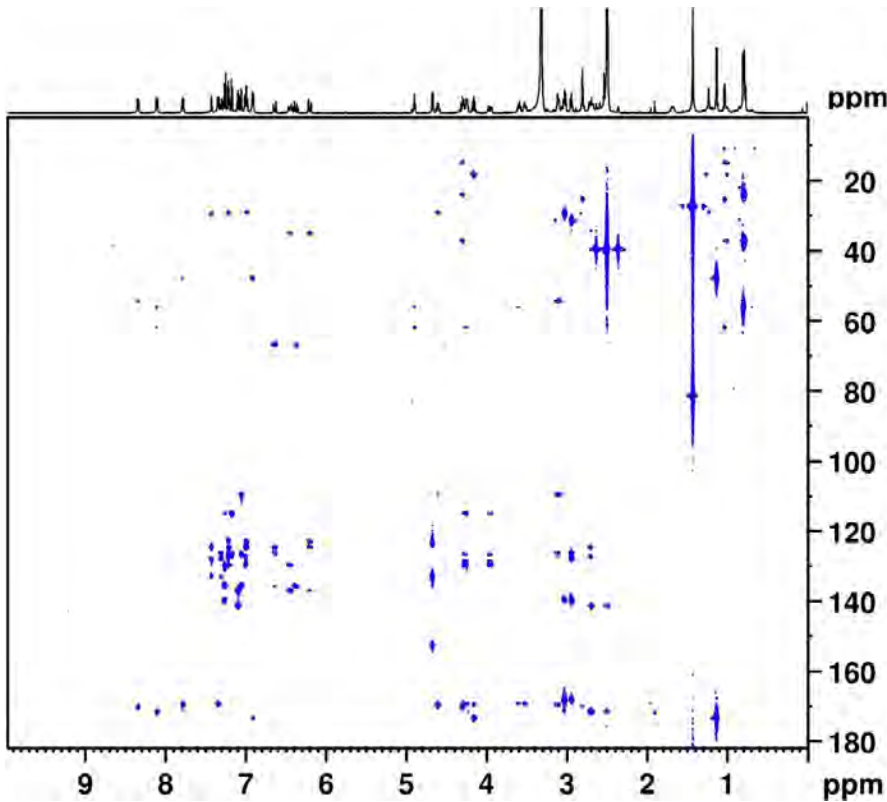

Current Data Parameters  
 NAME KL5-106-2-1\_AV500  
 EXPNO 6  
 PROCNO 1

F2 - Acquisition Parameters  
 Date 20121221  
 Time 20.21  
 INSTRUM av500  
 PROBHD 5 mm DCH 13C-1  
 PULPROG hmcgpl2ndqf  
 TD 2048  
 SOLVENT DMSO  
 NS 50  
 DS 16  
 SWH 5151.099 Hz  
 FIDRES 3.515185 Hz  
 AQ 0.1987925 sec  
 RG 202.91  
 DW 97.067 usec  
 DE 10.00 usec  
 TE 298.0 K  
 CNST6 120.0000000  
 CNST7 160.0000000  
 CNST13 7.0000000  
 D0 0.0000000 sec  
 D1 1.2000000 sec  
 D6 0.07142857 sec  
 D16 0.00020000 sec  
 IN0 0.00002270 sec

===== CHANNEL f1 =====  
 SFO1 500.1324246 MHz  
 NUC1 1H  
 P1 9.68 usec  
 P2 19.36 usec  
 PLW1 13.50000000 W

===== CHANNEL f2 =====  
 SFO2 125.7697360 MHz  
 NUC2 13C  
 P3 9.63 usec  
 PLW2 23.01399994 W

===== GRADIENT CHANNEL =====  
 GPNAM[1] SMSQ10.100  
 GPNAM[2] SMSQ10.100  
 GPNAM[3] SMSQ10.100  
 GPNAM[4] SMSQ10.100  
 GPNAM[5] SMSQ10.100  
 GPNAM[6] SMSQ10.100  
 GPZ1 50.00 %  
 GPZ2 30.00 %  
 GPZ3 40.10 %  
 GPZ4 15.00 %

Macrocyclic Product 18c

Current Data Parameters  
 NAME KL5-106-3  
 EXPNO 2  
 PROCNO 1

F2 - Acquisition Parameters  
 Date\_ 20121219  
 Time 17.27  
 INSTRUM av600  
 PROBHD 5 mm TBI5  
 PULPROG zg  
 TD 65536  
 SOLVENT DMSO  
 NS 8  
 DS 0  
 SWH 12376.237 Hz  
 FIDRES 0.188846 Hz  
 AQ 2.6476543 sec  
 RG 64  
 DW 40.400 usec  
 DE 6.50 usec  
 TE 298.0 K  
 D1 2.0000000 sec  
 TDO 1

===== CHANNEL f1 =====  
 NUC1 1H  
 P1 9.35 usec  
 PL1 -2.00 dB  
 PLLW 39.81071854 W  
 SFO1 600.1336008 MHz

F2 - Processing parameters  
 SI 65536  
 SF 600.1300070 MHz  
 WDFW EM  
 SSB 0  
 LB 0 Hz  
 GB 0  
 PC 1.00

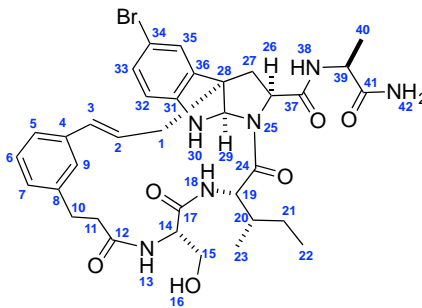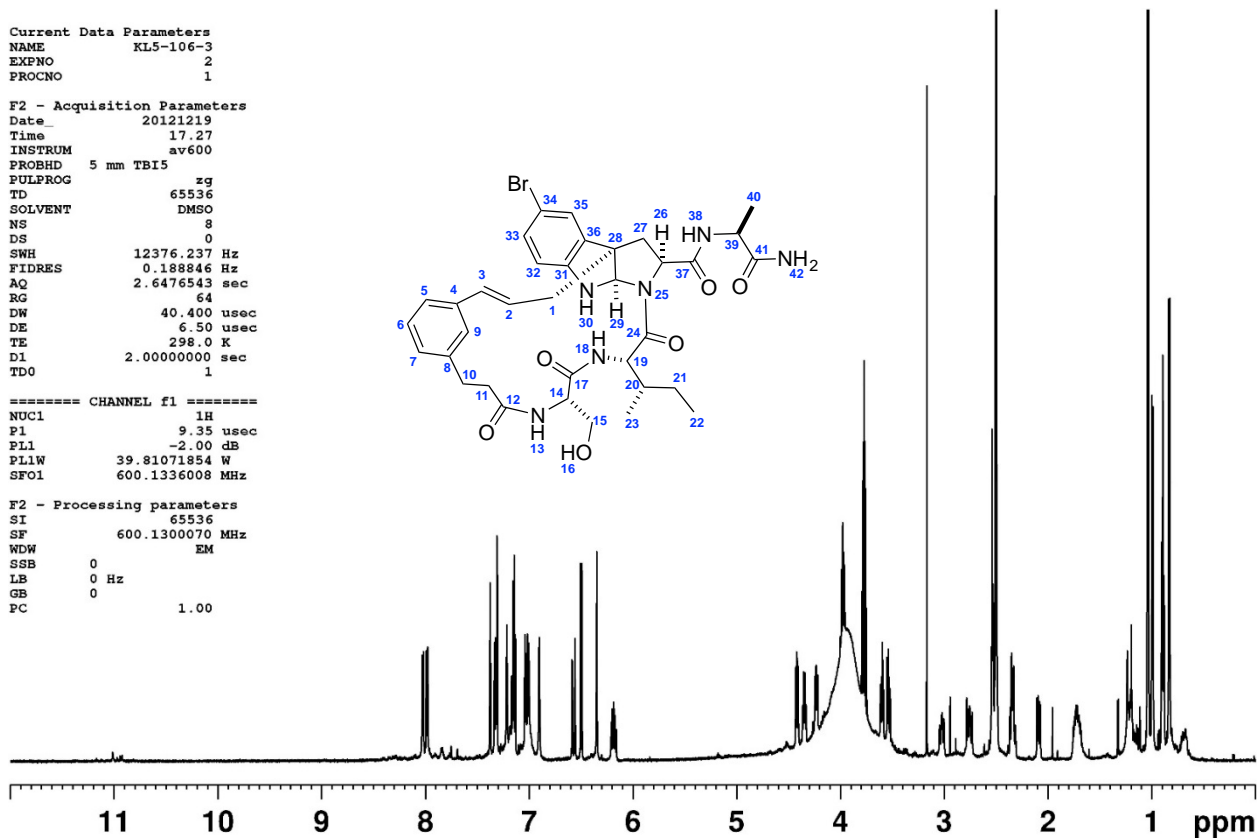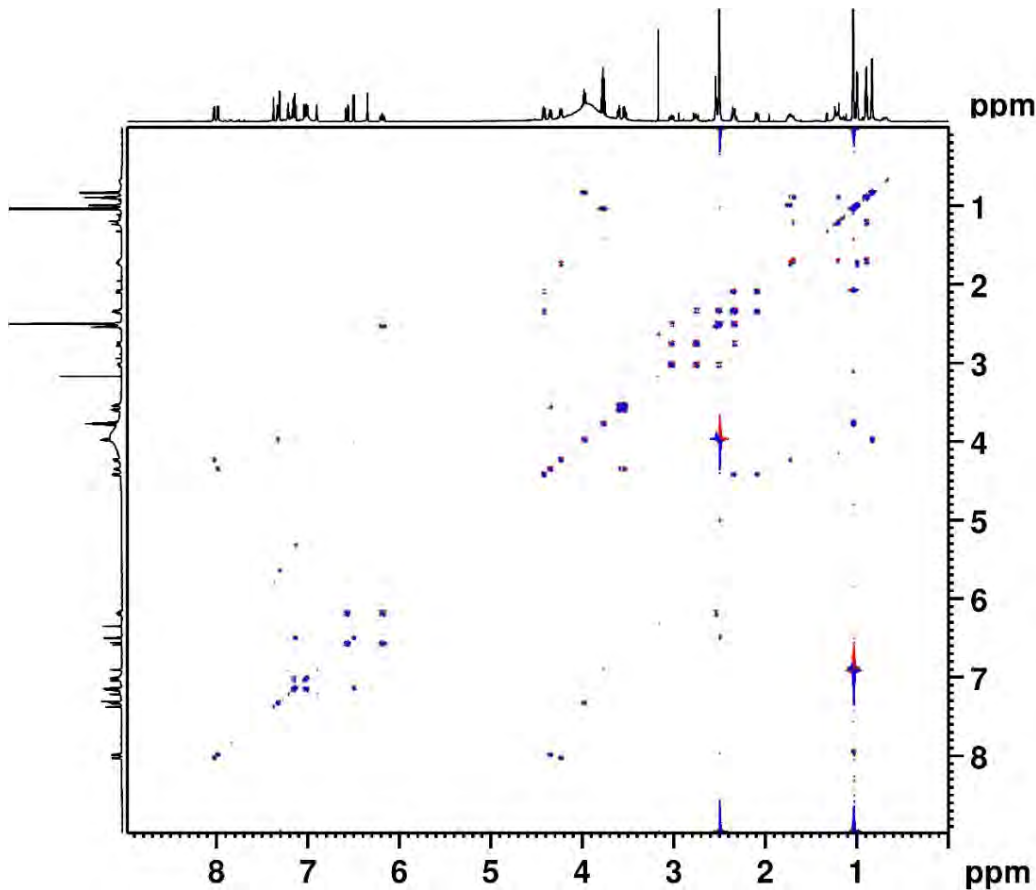

Current Data Parameters  
 NAME KL5-106-3  
 EXPNO 3  
 PROCNO 1

F2 - Acquisition Parameters  
 Date\_ 20121219  
 Time 17.32  
 INSTRUM av600  
 PROBHD 5 mm TBI5  
 PULPROG cosygpmfph  
 TD 2048  
 SOLVENT DMSO  
 NS 1  
 DS 16  
 SWH 5387.931 Hz  
 FIDRES 2.630826 Hz  
 AQ 0.1900544 sec  
 RG 64  
 DW 92.800 usec  
 DE 6.50 usec  
 TE 298.0 K  
 D0 0.00008090 sec  
 D1 1.50000000 sec  
 D13 0.00004000 sec  
 D16 0.00200000 sec  
 IN0 0.00018560 sec

===== CHANNEL f1 =====  
 NUC1 1H  
 P1 9.35 usec  
 P2 18.70 usec  
 PL1 -2.00 dB  
 PLLW 39.81071854 W  
 SFO1 600.1327006 MHz

===== GRADIENT CHANNEL =====  
 GPNAM[1] SINE.100  
 GPNAM[2] SINE.100  
 GPX1 0 %  
 GPX2 0 %  
 GPY1 0 %  
 GPY2 0 %  
 GPZ1 10.00 %  
 GPZ2 20.00 %  
 P16 1000.00 usec

F1 - Acquisition parameters  
 TD 512  
 SFO1 600.1327 MHz  
 FIDRES 10.523297 Hz  
 SW 8.978 ppm  
 FnmODE States-TPPI



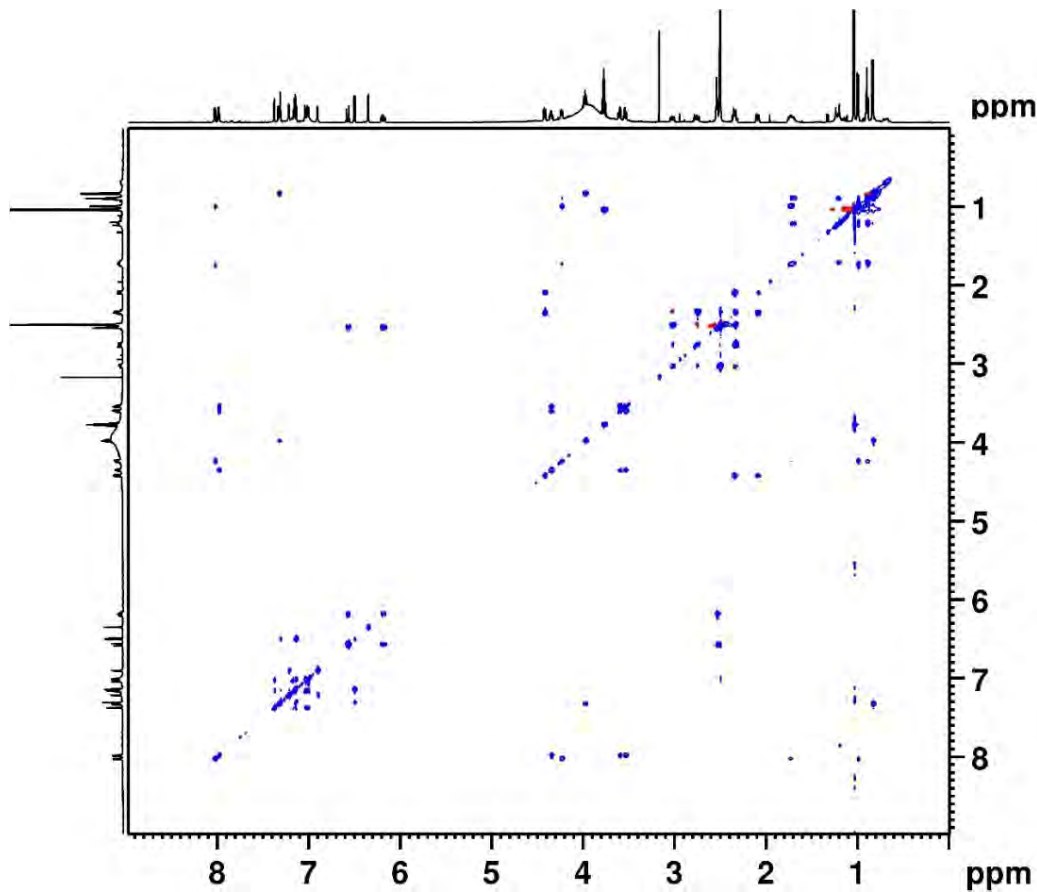

Current Data Parameters  
 NAME KL5-106-3  
 EXPNO 4  
 PROCNO 1

F2 - Acquisition Parameters  
 Date\_ 20121219  
 Time 17.48  
 INSTRUM av600  
 PROBHD 5 mm TBI5  
 PULPROG dipsi2etgpsi  
 TD 2048  
 SOLVENT DMSO  
 NS 8  
 DS 16  
 SWH 5387.931 Hz  
 FIDRES 2.630826 Hz  
 AQ 0.1900544 sec  
 RG 362  
 DW 92.800 usec  
 DE 6.50 usec  
 TE 298.0 K  
 DO 0.00000300 sec  
 D1 1.50000000 sec  
 D9 0.06000000 sec  
 D11 0.03000000 sec  
 D16 0.00020000 sec  
 D20 0.00001000 sec  
 D21 0.00001000 sec  
 IN0 0.00018560 sec  
 L1 14

===== CHANNEL f1 =====  
 NUC1 1H  
 P1 9.35 usec  
 P2 18.70 usec  
 P6 40.00 usec  
 FLL -2.00 dB  
 FLL0 10.62 dB  
 P1W 39.81071854 W  
 P1LW 2.17770982 W  
 SFO1 600.1327006 MHz

===== GRADIENT CHANNEL =====  
 GPNAM[1] SINE.100  
 GPNAM[2] SINE.100  
 GPX1 0 %  
 GPX2 0 %  
 GPY1 0 %  
 GPY2 0 %  
 GPZ1 30.00 %  
 GPZ2 30.00 %  
 P16 1000.00 usec

Current Data Parameters  
 NAME KL5-106-3 (02-2014)  
 EXPNO 4  
 PROCNO 1

F2 - Acquisition Parameters  
 Date\_ 20140218  
 Time 21.13  
 INSTRUM av600  
 PROBHD 5 mm TBI5  
 PULPROG npeaygpph  
 ID 2048  
 SOLVENT DMSO  
 NS 16  
 DS 16  
 SWH 7183.908 Hz  
 FIDRES 3.507768 Hz  
 AQ 0.1425908 sec  
 RG 161.3  
 DW 69.600 usec  
 DE 6.50 usec  
 TE 600.6 K  
 DO 0.00005674 sec  
 D1 2.00000000 sec  
 D9 0.00020000 sec  
 D16 0.00020000 sec  
 IN0 0.00013920 sec

===== CHANNEL f1 =====  
 NUC1 1H  
 P1 10.10 usec  
 P2 20.20 usec  
 FLL -2.00 dB  
 P1W 39.81071854 W  
 SFO1 600.1336008 MHz

===== GRADIENT CHANNEL =====  
 GPNAM[1] SINE.100  
 GPX1 0 %  
 GPY1 0 %  
 GPZ1 30.00 %  
 P16 1000.00 usec

F1 - Acquisition parameters  
 TD 512  
 SFO1 600.1336 MHz  
 FIDRES 14.031089 Hz  
 SW 11.971 ppm  
 PnMODE States-TPPI

F2 - Processing parameters  
 SI 1024  
 SF 600.1300038 MHz  
 WDM QSIHQ  
 SUB 2  
 LB 0 Hz  
 GB 0  
 PC 1.00

F1 - Processing parameters  
 SI 1024  
 P2 2  
 SF 600.1300037 MHz  
 WDM  
 SUB 2  
 LB 0 Hz  
 GB 0

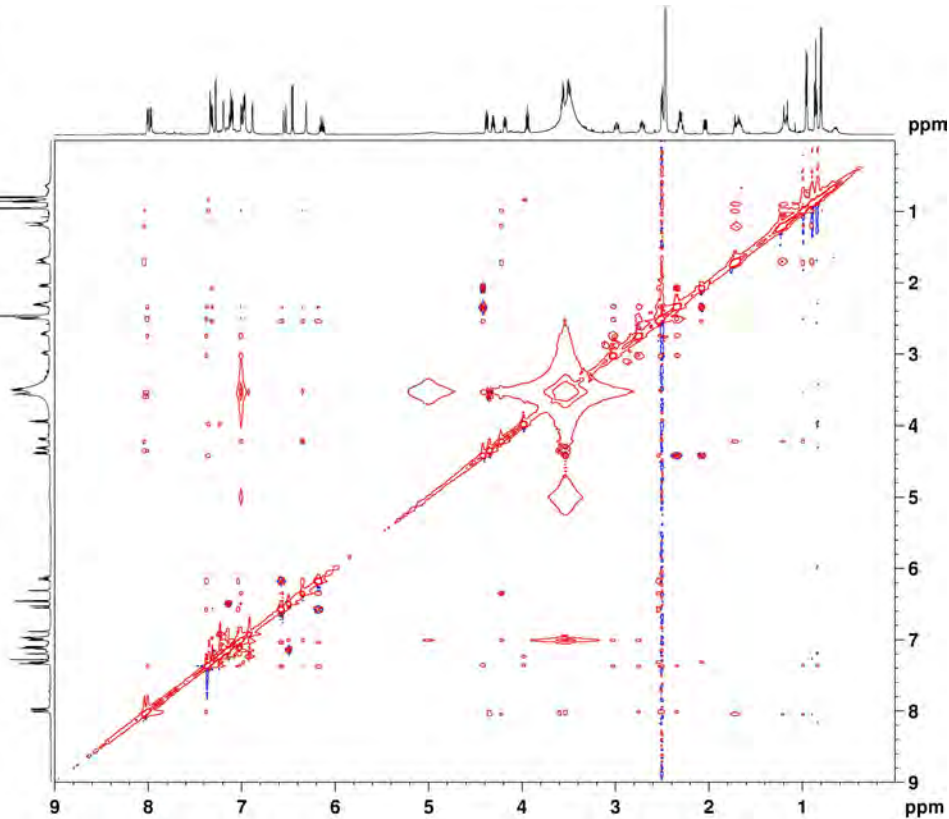

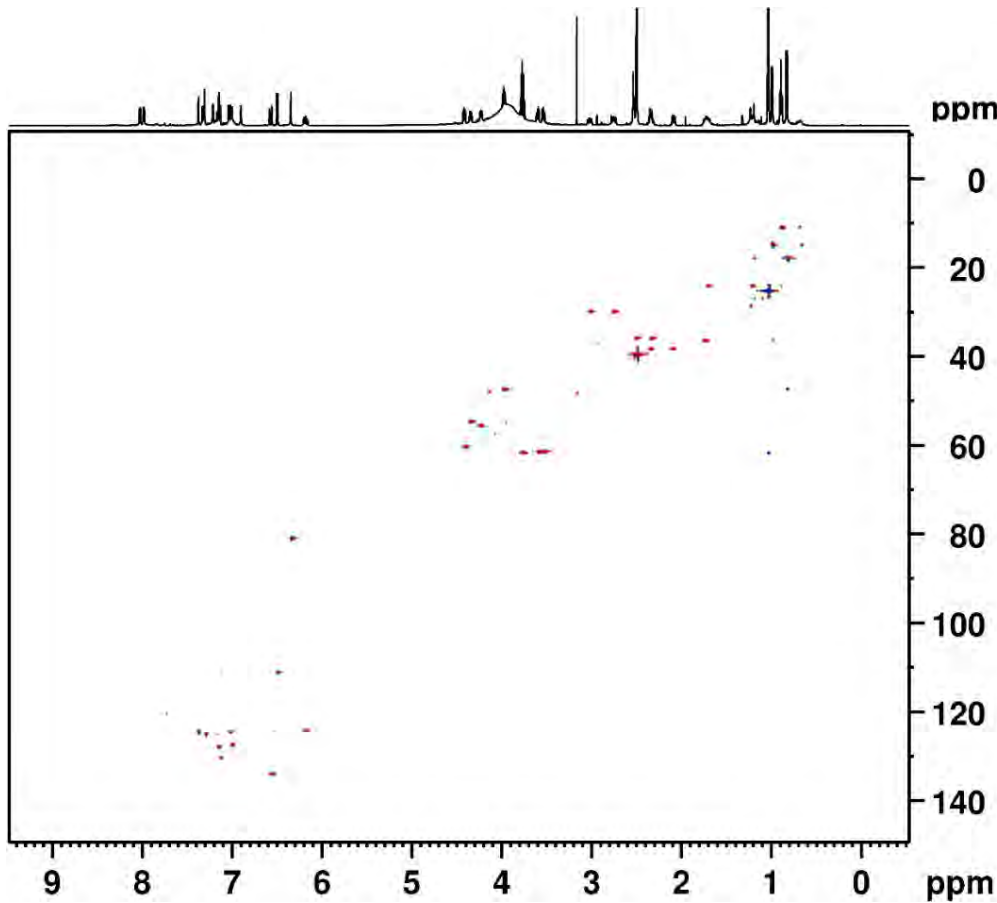

```

Current Data Parameters
NAME          KL5-106-3
EXPNO         5
PROCNO        1

F2 - Acquisition Parameters
Date_         20121219
Time          18.19
INSTRUM       av600
PROBHD        5 mm TBI5
PULPROG       hsqcetgpsisp
TD            2048
SOLVENT       DMSO
NS            8
DS            16
SWH           6009.615 Hz
FIDRES        2.934382 Hz
AQ            0.1703936 sec
RG            26008
DW            83.200 usec
DE            6.00 usec
TE            298.0 K
CNST2         145.0000000
D0            0.00000300 sec
D1            1.00000000 sec
D4            0.00172414 sec
D11           0.03000000 sec
D16           0.00020000 sec
D24           0.00086200 sec
IN0           0.00002070 sec
ZGPTNS

===== CHANNEL f1 =====
NUC1          1H
P1            9.35 usec
P2            18.70 usec
P28           1000.00 usec
PL1           -2.00 dB
PL1W          39.81071854 W
SFO1          600.1327006 MHz

===== CHANNEL f2 =====
CPDPRG[2]    garp
NUC2          13C
P3            18.50 usec
P4            37.00 usec
P14           1000.00 usec
PCPD2         65.00 usec
PL0           120.00 dB
PL2           -3.00 dB
PL12          7.91 dB
PL0W          0 W
PL2W          150.35617065 W
PL12W         12.19330025 W
SFO2          150.9133722 MHz
  
```

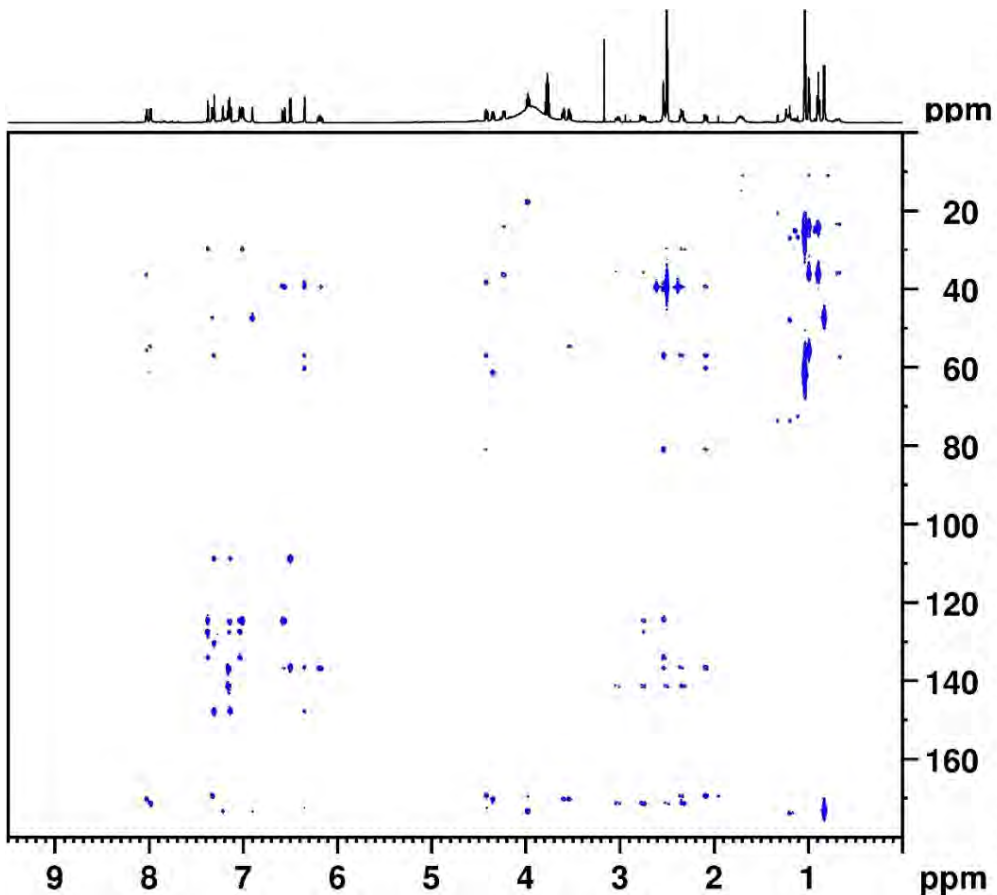

```

Current Data Parameters
NAME          KL5-106-3
EXPNO         6
PROCNO        1

F2 - Acquisition Parameters
Date_         20121219
Time          19.42
INSTRUM       av600
PROBHD        5 mm TBI5
PULPROG       hmbcgp12ndgf
TD            2048
SOLVENT       DMSO
NS            32
DS            24
SWH           6009.615 Hz
FIDRES        2.934382 Hz
AQ            0.1703936 sec
RG            26008
DW            83.200 usec
DE            6.00 usec
TE            298.0 K
CNST6         125.0000000
CNST7         165.0000000
CNST13        8.00000000
D0            0.00000300 sec
D1            1.20000005 sec
D6            0.06250000 sec
D16           0.00020000 sec
IN0           0.00001745 sec

===== CHANNEL f1 =====
NUC1          1H
P1            9.35 usec
P2            18.70 usec
PL1           -2.00 dB
PL1W          39.81071854 W
SFO1          600.1327006 MHz

===== CHANNEL f2 =====
NUC2          13C
P3            18.50 usec
PL2           -3.00 dB
PL2W          150.35617065 W
SFO2          150.9156357 MHz

===== GRADIENT CHANNEL =====
GPNAM[1]     SINE.100
GPNAM[2]     SINE.100
GPNAM[3]     SINE.100
GPNAM[4]     SINE.100
GPNAM[5]     SINE.100
GPNAM[6]     SINE.100
GPX1         0 %
GPX2         0 %
  
```

Macrocyclic Product 18d

Current Data Parameters  
 NAME KL5-106-4\_AV600  
 EXPNO 22  
 PROCNO 1

F2 - Acquisition Parameters  
 Date\_ 20130104  
 Time 18.26  
 INSTRUM av600  
 PROBHD 5 mm BB5  
 PULPROG zg  
 TD 65536  
 SOLVENT DMSO  
 NS 8  
 DS 0  
 SWH 12376.237 Hz  
 FIDRES 0.188846 Hz  
 AQ 2.6476543 sec  
 RG 114  
 DW 40.400 usec  
 DE 6.50 usec  
 TE 340.0 K  
 D1 2.00000000 sec  
 TDO 1

===== CHANNEL f1 =====  
 NUC1 1H  
 P1 15.25 usec  
 PL1 -1.00 dB  
 PLLW 31.62277603 W  
 SFO1 600.1336008 MHz

F2 - Processing parameters  
 SI 65536  
 SF 600.1300069 MHz  
 WDW EM  
 SSB 0  
 LB 0 Hz  
 GB 0  
 PC 1.00

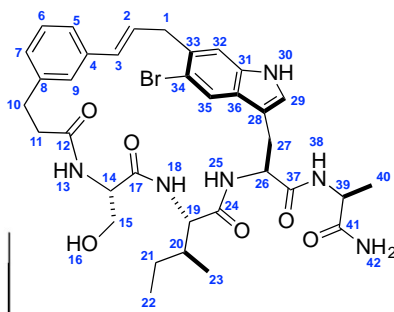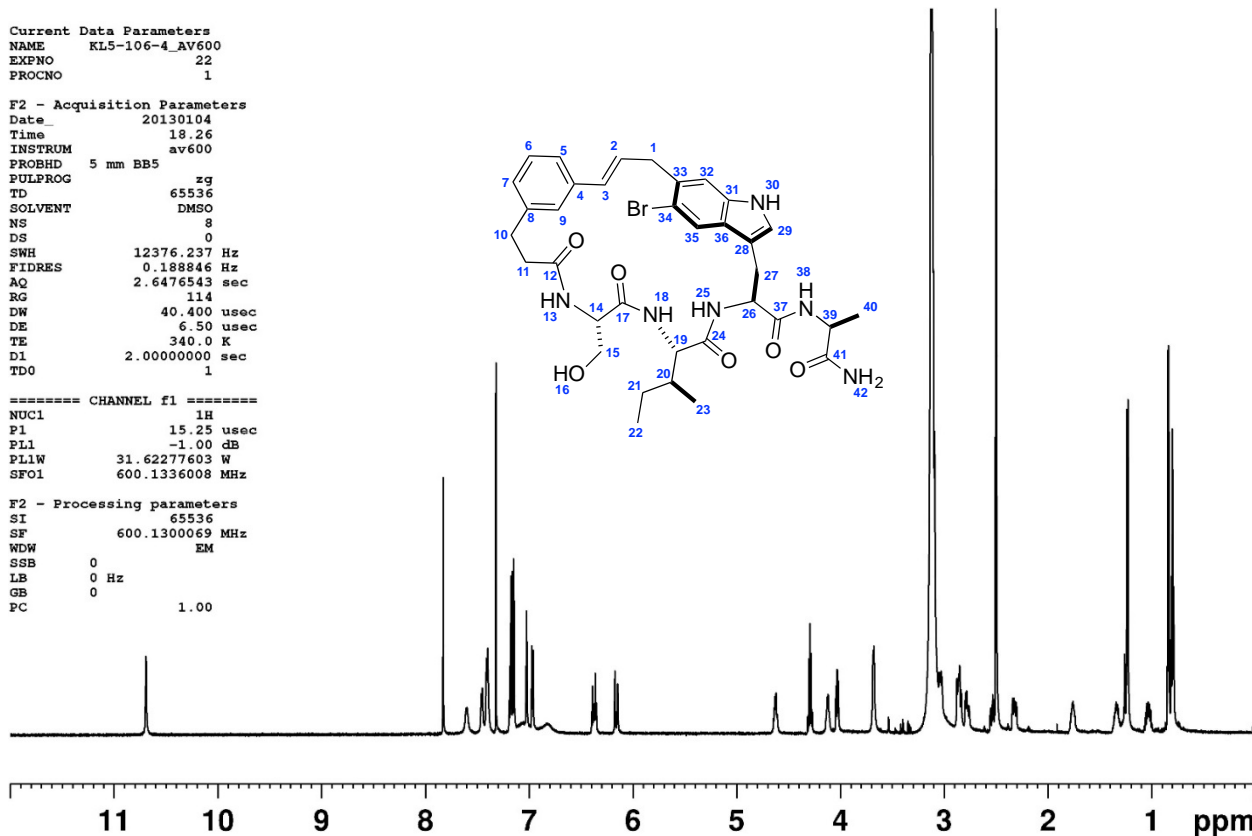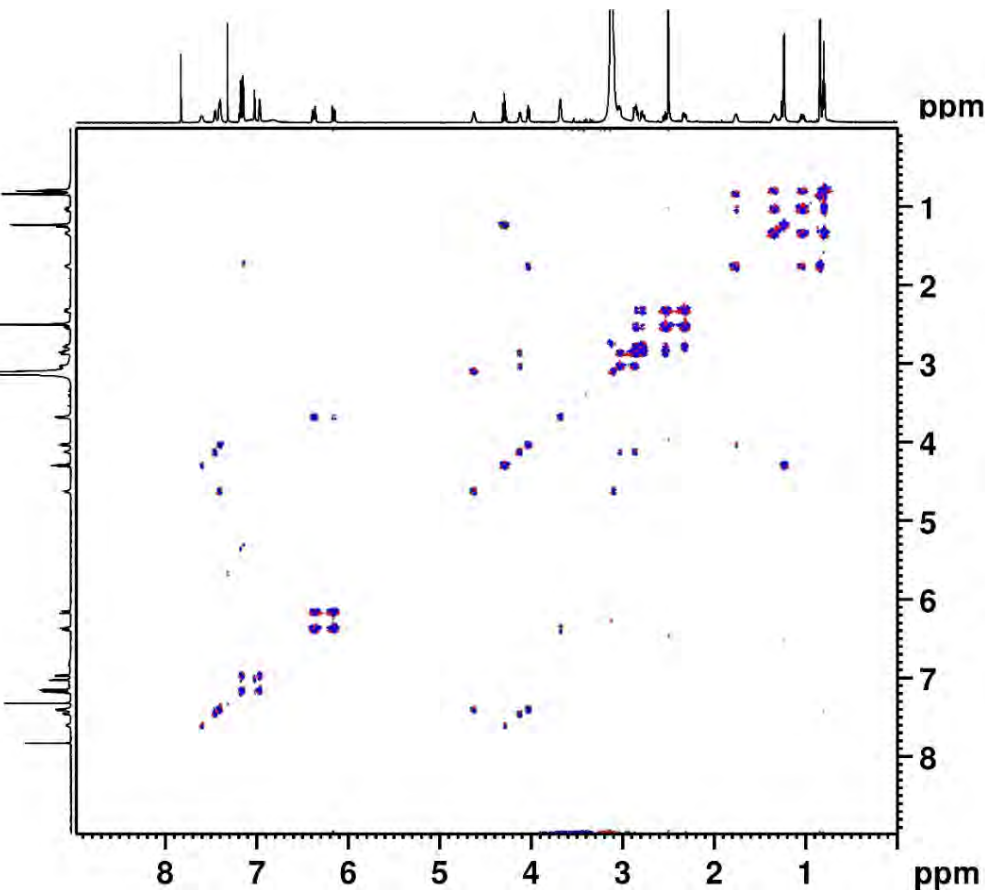

Current Data Parameters  
 NAME KL5-106-4\_AV600  
 EXPNO 25  
 PROCNO 1

F2 - Acquisition Parameters  
 Date\_ 20130104  
 Time 18.27  
 INSTRUM av600  
 PROBHD 5 mm BB5  
 PULPROG cosygpmfph  
 TD 2048  
 SOLVENT DMSO  
 NS 1  
 DS 16  
 SWH 5387.931 Hz  
 FIDRES 2.630826 Hz  
 AQ 0.1900544 sec  
 RG 114  
 DW 92.800 usec  
 DE 6.50 usec  
 TE 340.0 K  
 DO 0.00007338 sec  
 D1 1.50000000 sec  
 D13 0.00000400 sec  
 D16 0.00020000 sec  
 INO 0.00018560 sec

===== CHANNEL f1 =====  
 NUC1 1H  
 P1 15.25 usec  
 P2 30.50 usec  
 PL1 -1.00 dB  
 PLLW 31.62277603 W  
 SFO1 600.1327006 MHz

===== GRADIENT CHANNEL =====  
 GFNAM[1] SINE.100  
 GFNAM[2] SINE.100  
 GPZ1 10.00 %  
 GPZ2 20.00 %  
 P16 1000.00 usec

F1 - Acquisition parameters  
 TD 512  
 SFO1 600.1327 MHz  
 FIDRES 10.523297 Hz  
 SW 8.978 ppm  
 FMODE States-TPPI

F2 - Processing parameters  
 SI 2048  
 SF 600.1300095 MHz  
 WDW QSINE

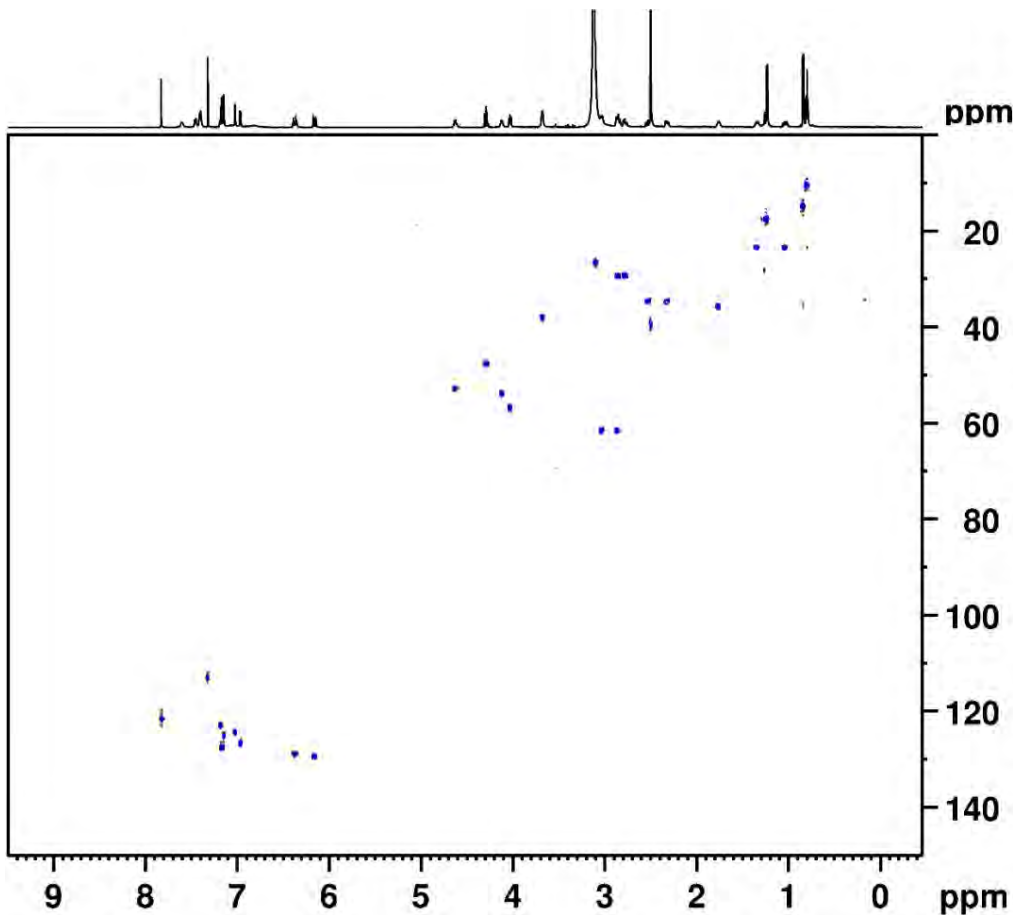

```

Current Data Parameters
NAME      KL5-106-4_AV600
EXPNO    27
PROCNO   1

F2 - Acquisition Parameters
Date_    20130104
Time     18.44
INSTRUM  av600
PROBHD   5 mm BB5
PULPROG  hsqcetgpsisp
TD       2048
SOLVENT  DMSO
NS       6
DS       16
SWH      6009.615 Hz
FIDRES   2.934382 Hz
AQ       0.1703936 sec
RG       26008
DW       83.200 usec
DE       6.00 usec
TE       340.0 K
CNST2    145.0000000
D0       0.00000300 sec
D1       1.00000000 sec
D4       0.00172414 sec
D11      0.03000000 sec
D16      0.00020000 sec
D24      0.00086200 sec
INO      0.00002070 sec
ZGOPTNS

===== CHANNEL f1 =====
NUC1     1H
P1       15.25 usec
P2       30.50 usec
P28      0 usec
PL1      -1.00 dB
PL1W     31.62277603 W
SFO1     600.1327006 MHz

===== CHANNEL f2 =====
CPDPRG[2] garp
NUC2     13C
P3       9.75 usec
P4       19.50 usec
P14      1000.00 usec
PCPD2    65.00 usec
PLO      120.00 dB
PL2      0 dB
PL12     16.48 dB
PLOW     0 W
PL2W     75.35659027 W
PL12W    1.69481111 W
SFO2     150.9133722 MHz

```

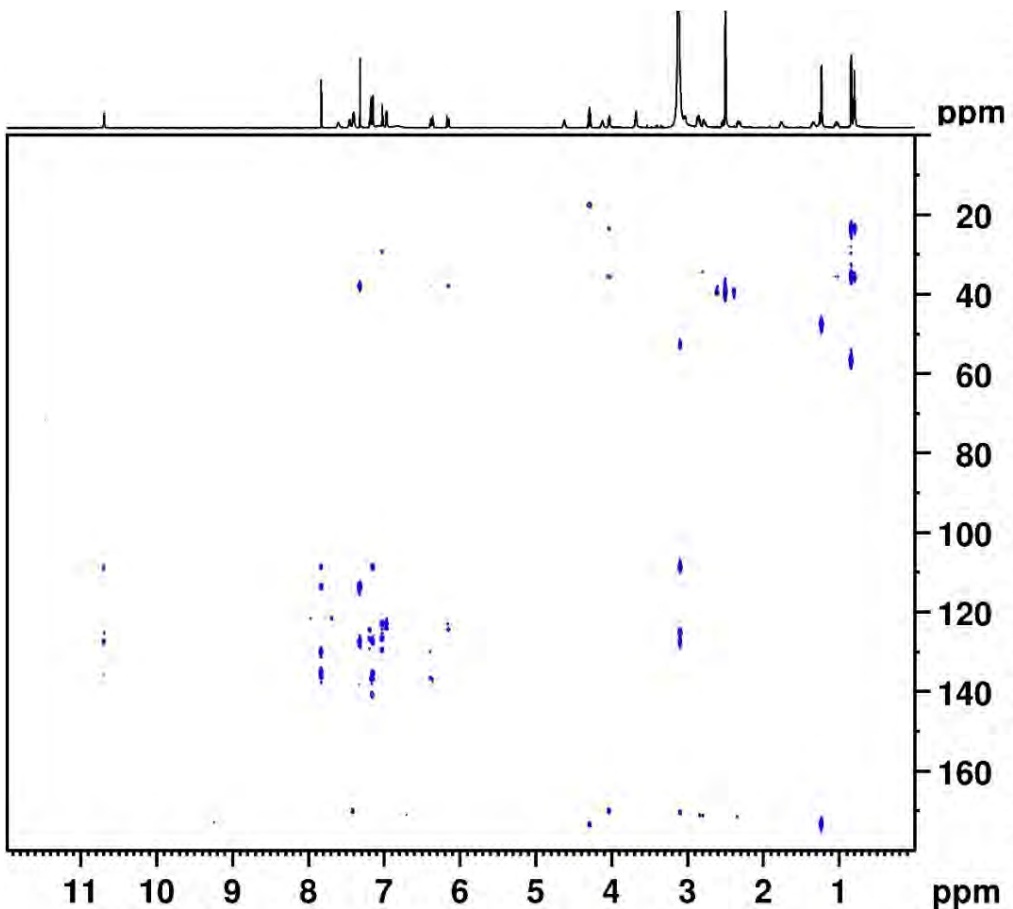

```

Current Data Parameters
NAME      KL5-106-4_AV600
EXPNO    28
PROCNO   1

F2 - Acquisition Parameters
Date_    20130104
Time     19.06
INSTRUM  av600
PROBHD   5 mm BB5
PULPROG  hmbcgp12ndqf
TD       2048
SOLVENT  DMSO
NS       32
DS       24
SWH      7183.908 Hz
FIDRES   3.507768 Hz
AQ       0.1425408 sec
RG       26008
DW       69.600 usec
DE       6.00 usec
TE       340.0 K
CNST6    125.0000000
CNST7    165.0000000
CNST13   8.0000000
D0       0.00000300 sec
D1       1.20000005 sec
D6       0.06250000 sec
D16      0.00020000 sec
INO      0.00001745 sec

===== CHANNEL f1 =====
NUC1     1H
P1       15.25 usec
P2       30.50 usec
PL1      -1.00 dB
PL1W     31.62277603 W
SFO1     600.1336008 MHz

===== CHANNEL f2 =====
NUC2     13C
P3       9.75 usec
PL2      0 dB
PL2W     75.35659027 W
SFO2     150.9156357 MHz

===== GRADIENT CHANNEL =====
GFNAM[1] SINE 100
GFNAM[2] SINE 100
GFNAM[3] SINE 100
GFNAM[4] SINE 100
GFNAM[5] SINE 100
GFNAM[6] SINE 100
GPZ1     50.00 %
GPZ2     30.00 %

```

Macrocyclic Product 18e

```

Current Data Parameters
NAME      KL5-106-5-1
EXPNO    2
PROCNO   1

F2 - Acquisition Parameters
Date_    20121221
Time     17.32
INSTRUM av600
PROBHD   5 mm TBI5
PULPROG  zg
TD        65536
SOLVENT  DMSO
NS        8
DS        0
SWH       12376.237 Hz
FIDRES    0.188846 Hz
AQ        2.6476543 sec
RG         114
DW        40.400 usec
DE        6.50 usec
TE        298.0 K
D1        2.0000000 sec
TD0       1
    
```

```

===== CHANNEL f1 =====
NUC1      1H
P1        9.23 usec
PL1       -2.00 dB
PL1W      39.81071854 W
SFO1      600.1336008 MHz
    
```

```

F2 - Processing parameters
SI         65536
SF         600.1300070 MHz
WDW        EM
SSB        0
LB         0 Hz
GB         0
PC         1.00
    
```

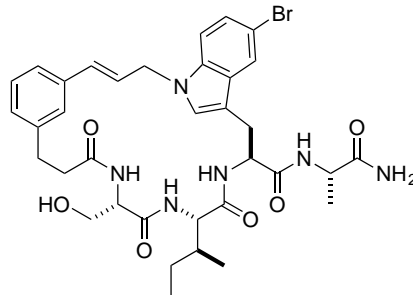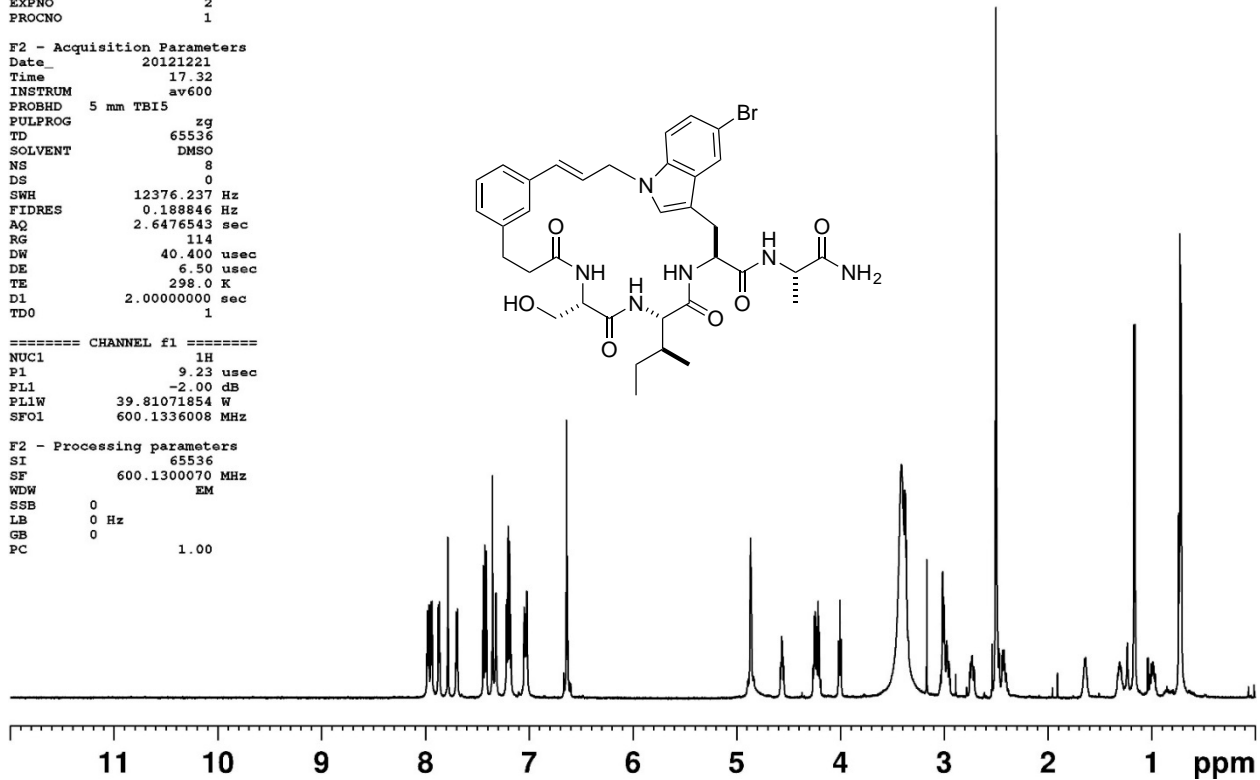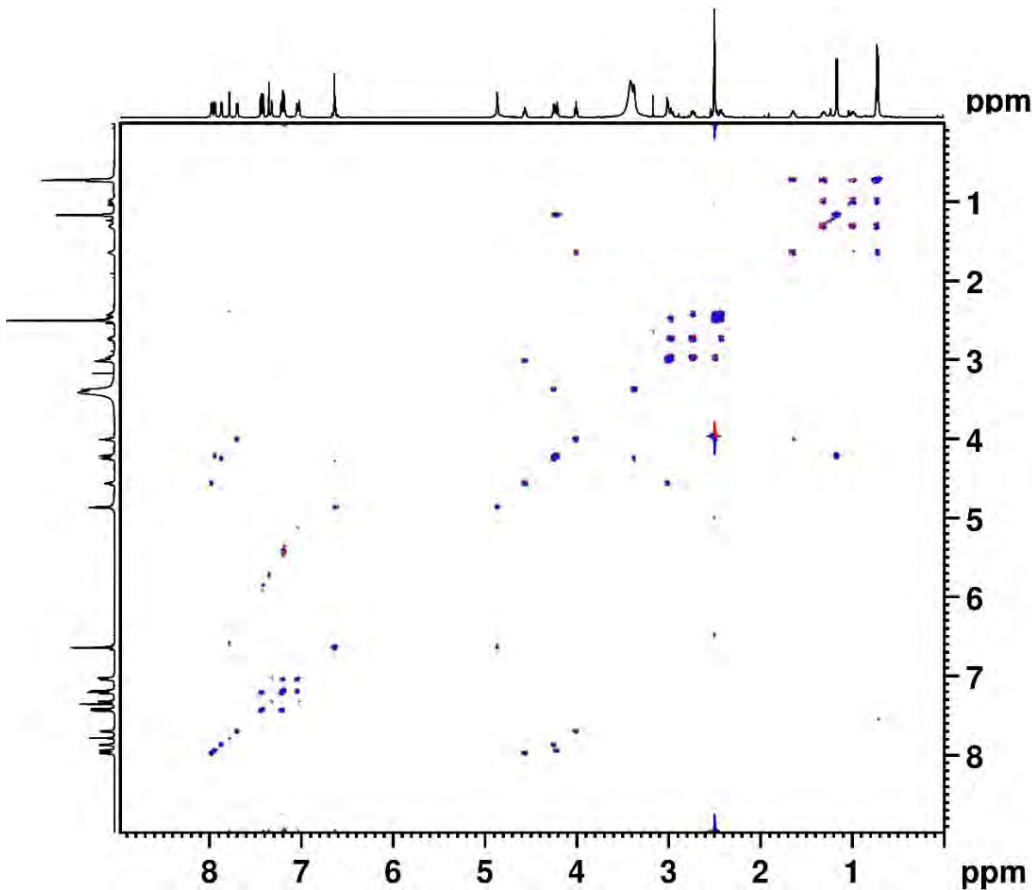

```

Current Data Parameters
NAME      KL5-106-5-1
EXPNO    3
PROCNO   1
    
```

```

F2 - Acquisition Parameters
Date_    20121221
Time     17.35
INSTRUM av600
PROBHD   5 mm TBI5
PULPROG  cosygpmfph
TD        2048
SOLVENT  DMSO
NS        16
DS        1
SWH       5387.931 Hz
FIDRES    2.630826 Hz
AQ        0.1900544 sec
RG         114
DW        92.800 usec
DE        6.50 usec
TE        298.0 K
D0        0.00008105 sec
D1        1.5000000 sec
D13       0.00000400 sec
D16       0.00020000 sec
IN0       0.00018560 sec
    
```

```

===== CHANNEL f1 =====
NUC1      1H
P1        9.23 usec
P2        18.46 usec
PL1       -2.00 dB
PL1W      39.81071854 W
SFO1      600.1327006 MHz
    
```

```

===== GRADIENT CHANNEL =====
GPNAM[1]  SINE.100
GPNAM[2]  SINE.100
GPX1      0 %
GPX2      0 %
GPY1      0 %
GPY2      0 %
GPZ1      10.00 %
GPZ2      20.00 %
P16       1000.00 usec
    
```

```

F1 - Acquisition parameters
TD        512
SFO1      600.1327 MHz
FIDRES    10.523297 Hz
SW        8.978 ppm
FMODE     States-TPPI
    
```

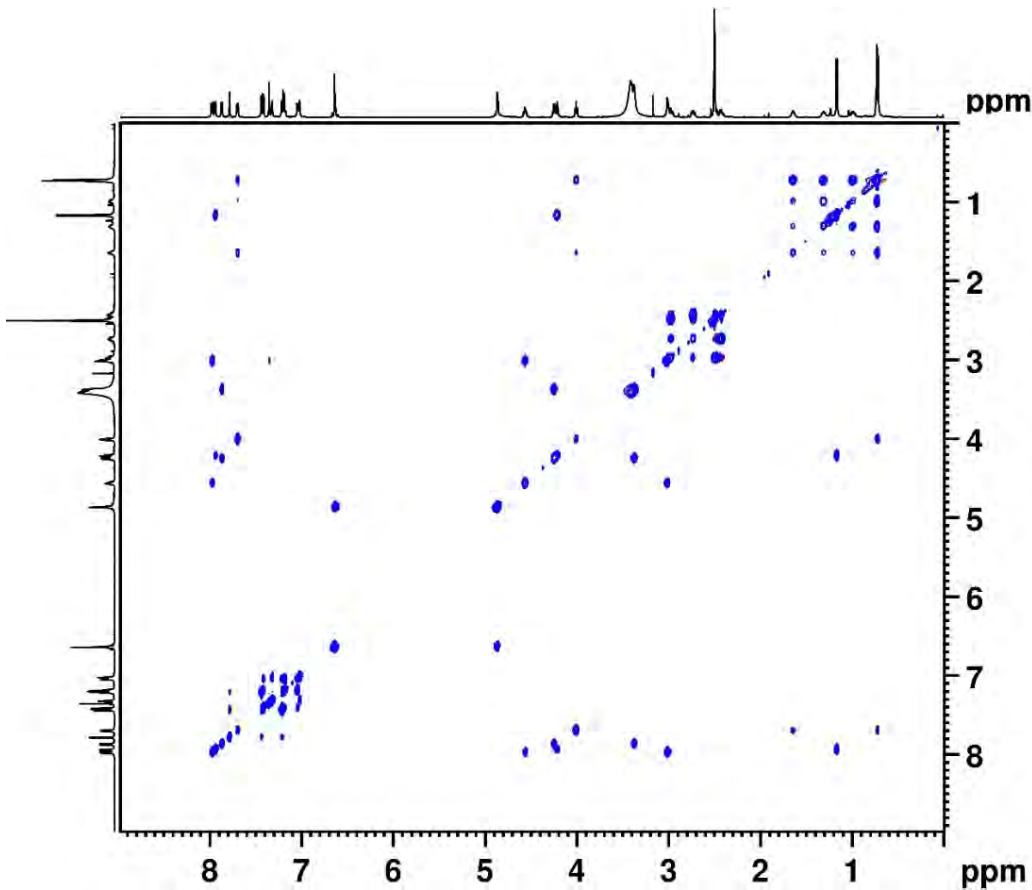

```

Current Data Parameters
NAME      KL5-106-5-1
EXPNO    4
PROCNO   1

F2 - Acquisition Parameters
Date_    20121221
Time     17.51
INSTRUM  av600
PROBHD   5 mm TBI5
PULPROG  dipsi2etgpsi
TD       2048
SOLVENT  DMSO
NS       8
DS       16
SWH      5387.931 Hz
FIDRES   2.630826 Hz
AQ       0.1900544 sec
RG       362
DW       92.800 usec
DE       6.50 usec
TE       298.0 K
D0       0.00000300 sec
D1       1.50000000 sec
D9       0.06000000 sec
D11      0.03000000 sec
D16      0.00020000 sec
D20      0.00001000 sec
D21      0.00001000 sec
IN0      0.00018560 sec
LI       14

===== CHANNEL f1 =====
NUC1     1H
P1       9.23 usec
P2       18.46 usec
P6       40.00 usec
PL1      -2.00 dB
PL10     10.74 dB
PL1W     39.81071854 W
PL10W    2.11836123 W
SFO1     600.1327006 MHz

===== GRADIENT CHANNEL =====
GPNAM[1] SINE.100
GPNAM[2] SINE.100
GPX1     0 %
GPX2     0 %
GPY1     0 %
GPY2     0 %
GPZ1     30.00 %
GPZ2     30.00 %
P16      1000.00 usec

```

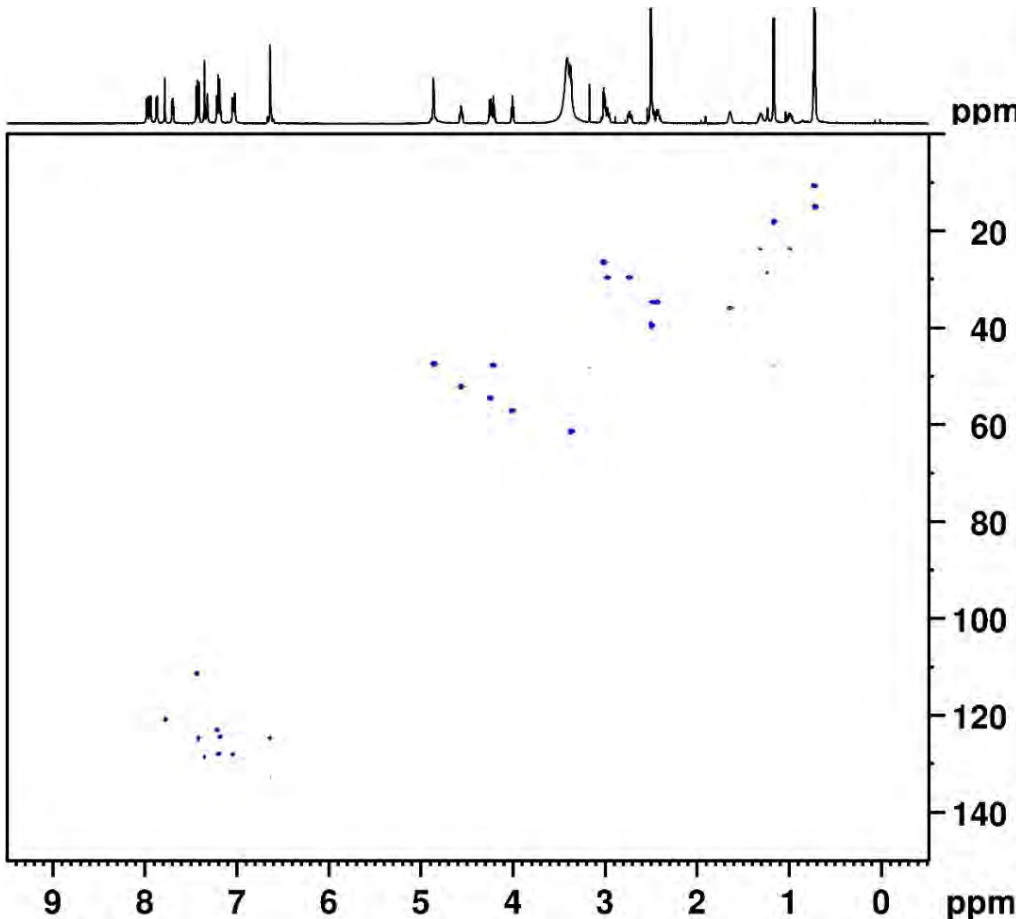

```

Current Data Parameters
NAME      KL5-106-5-1
EXPNO    5
PROCNO   1

F2 - Acquisition Parameters
Date_    20121221
Time     18.22
INSTRUM  av600
PROBHD   5 mm TBI5
PULPROG  hsqcetgpsiisp
TD       2048
SOLVENT  DMSO
NS       10
DS       16
SWH      6009.615 Hz
FIDRES   2.934382 Hz
AQ       0.1703936 sec
RG       26008
DW       83.200 usec
DE       6.00 usec
TE       298.1 K
CNST2    145.0000000
D0       0.00000300 sec
D1       1.00000000 sec
D4       0.00172414 sec
D11      0.03000000 sec
D16      0.00020000 sec
D24      0.00086200 sec
IN0      0.00002070 sec
ZGPTNS

===== CHANNEL f1 =====
NUC1     1H
P1       9.23 usec
P2       18.46 usec
P28      1000.00 usec
PL1      -2.00 dB
PL1W     39.81071854 W
SFO1     600.1327006 MHz

===== CHANNEL f2 =====
CPDPRG[2] garp
NUC2     13C
P3       18.50 usec
P4       37.00 usec
P14      1000.00 usec
PCPD2    65.00 usec
PL0      120.00 dB
PL2      -3.00 dB
PL12     7.91 dB
FLOW     0 W
PL2W     150.35617065 W
PL12W    12.19330025 W
SFO2     150.9133722 MHz

```

Acyclic Precursor 15

```

Current Data Parameters
NAME      BC-III-140_pure
EXPNO    1
PROCNO   1

F2 - Acquisition Parameters
Date_    20150218
Time     11.33
INSTRUM  av500
PROBHD   5 mm DCH 13C-1
PULPROG  zg30
TD        65536
SOLVENT  DMSO
NS        8
DS        0
SWH       10000.000 Hz
FIDRES   0.152588 Hz
AQ        3.2768500 sec
RG        21.37
DW        50.000 usec
DE        10.00 usec
TE        298.0 K
D1        2.00000000 sec
TD0       1

===== CHANNEL f1 =====
SFO1     500.1330008 MHz
NUC1      1H
P1        10.00 usec
PLW1     13.50000000 W

F2 - Processing parameters
SI        65536
SF        500.1300146 MHz
WDW       EM
SSB       0
LB        0.30 Hz
GB        0
PC        1.00
    
```

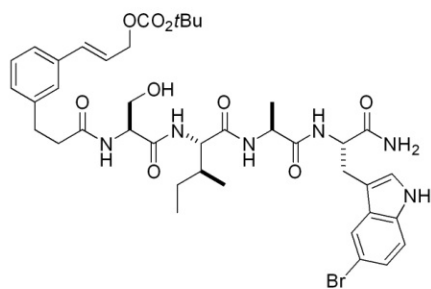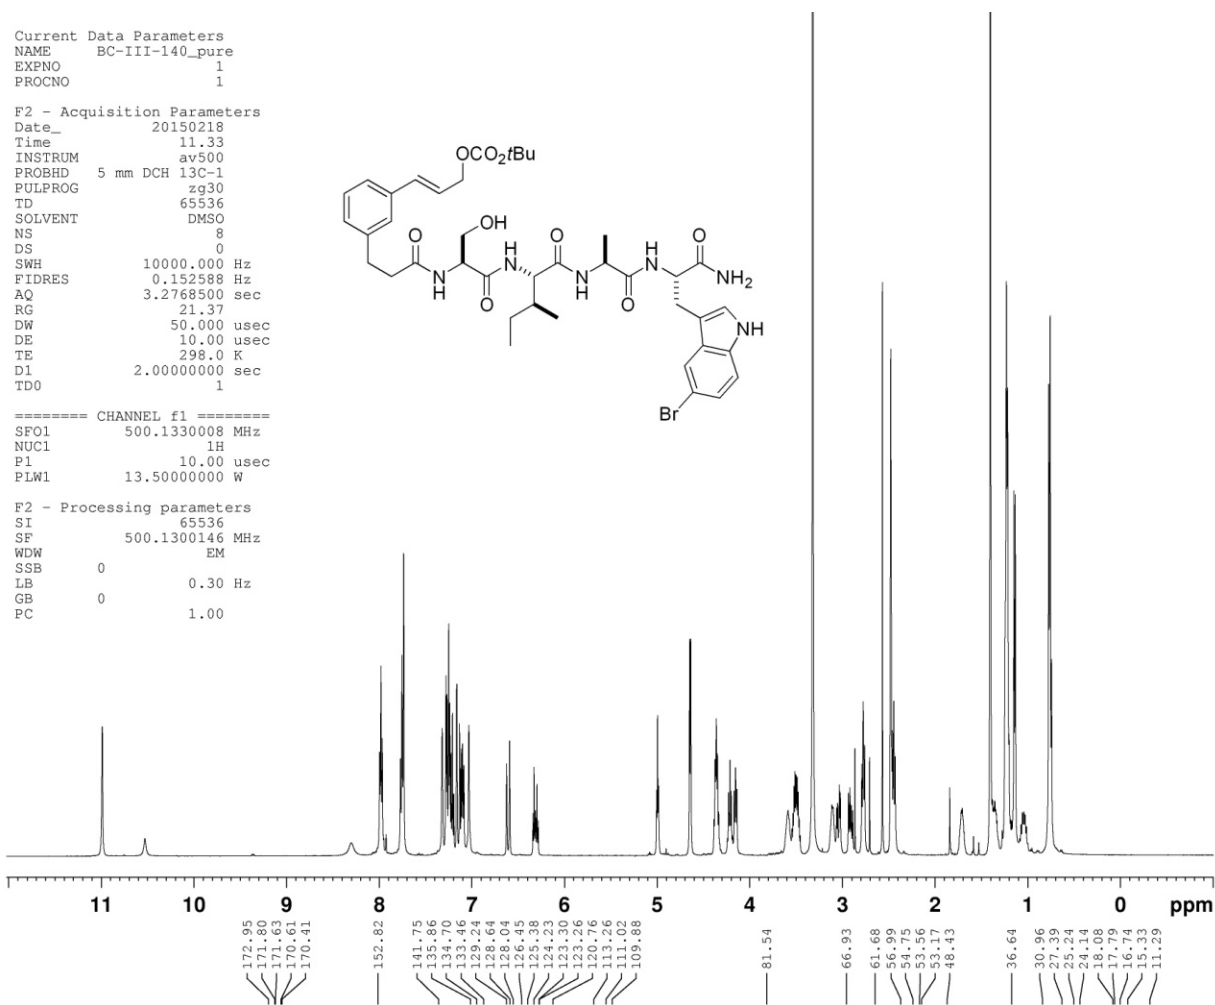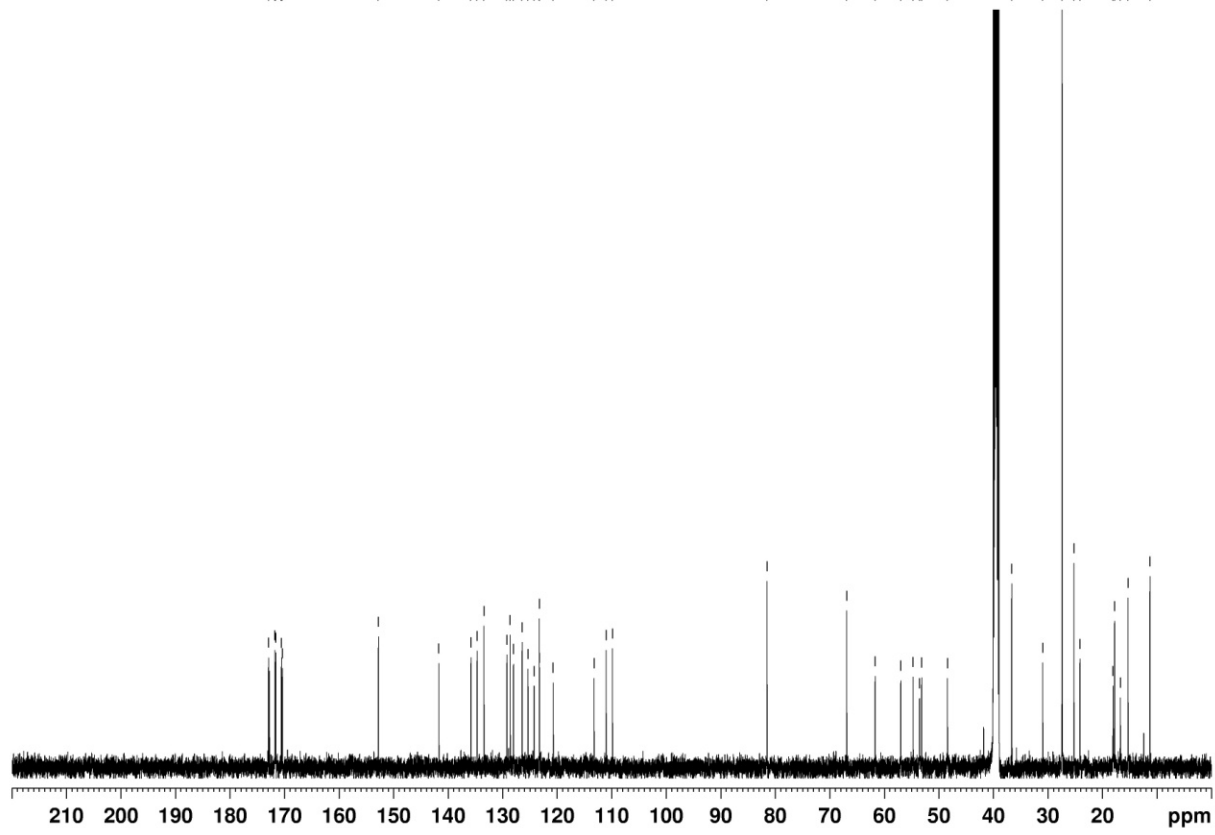

Macrocyclic Product 19a

```

Current Data Parameters
NAME      BC-III-232A
EXPNO    2
PROCNO   1

F2 - Acquisition Parameters
Date_    20150622
Time     20.30
INSTRUM  av600
PROBHD   5 mm TBI5
PULPROG  zg
TD        65536
SOLVENT  DMSO
NS        16
DS        0
SWH       12376.237 Hz
FIDRES    0.188846 Hz
AQ        2.6477044 sec
RG         90.5
DW         40.400 usec
DE         6.50 usec
TE         298.0 K
D1         2.00000000 sec
TD0        1
    
```

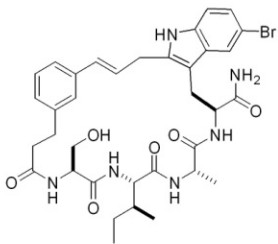

```

===== CHANNEL f1 =====
NUC1     1H
P1       11.15 usec
PL1      -2.00 dB
PL1W     39.81071854 W
SF01     600.1336008 MHz

F2 - Processing parameters
SI        65536
SF        600.1300071 MHz
WDW       EM
SSB       0
LB        0.30 Hz
GB        0
PC        1.00
    
```

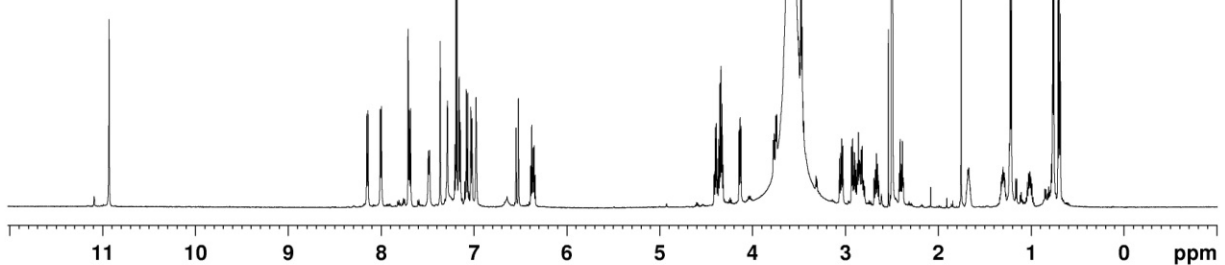

```

Current Data Parameters
NAME      BC-III-232A
EXPNO    2
PROCNO   1
    
```

```

F2 - Acquisition Parameters
Date_    20150622
Time     20.34
INSTRUM  av600
PROBHD   5 mm TBI5
PULPROG  cosyggprgf
TD        2048
SOLVENT  DMSO
NS        16
DS        2
SWH       7183.908 Hz
FIDRES    3.507768 Hz
AQ        0.1425508 sec
RG         456.1
DW         65.600 usec
DE         6.50 usec
TE         298.0 K
D0         0.00000300 sec
D1         1.00000000 sec
D11        0.03000000 sec
D12        0.00002000 sec
D16        0.00020000 sec
IN0        0.00013920 sec
    
```

```

===== CHANNEL f1 =====
NUC1     1H
P0        8.00 usec
P1       11.15 usec
PL1      -2.00 dB
PL9       120.00 dB
PL1W     39.81071854 W
PL9W     0 W
SF01     600.1336008 MHz
    
```

```

===== GRADIENT CHANNEL =====
GPHAM1   0 %
SINE.100
GFX1     0 %
GFX2     0 %
GFX3     10.00 %
P16      1000.00 usec
    
```

```

F1 - Acquisition parameters
TD        512
SF01     600.1336 MHz
FIDRES    14.031077 Hz
SW        11.971 ppm
F1MODE    QF
    
```

```

F2 - Processing parameters
SI        4096
SF        600.1300047 MHz
WDW       QSINE
SSB       1.5
LB        0 Hz
GB        0
PC        1.00
    
```

```

F1 - Processing parameters
SI        4096
MC2       QF
SF        600.1300054 MHz
WDW       QSINE
SSB       1.5
LB        0 Hz
GB        0
    
```

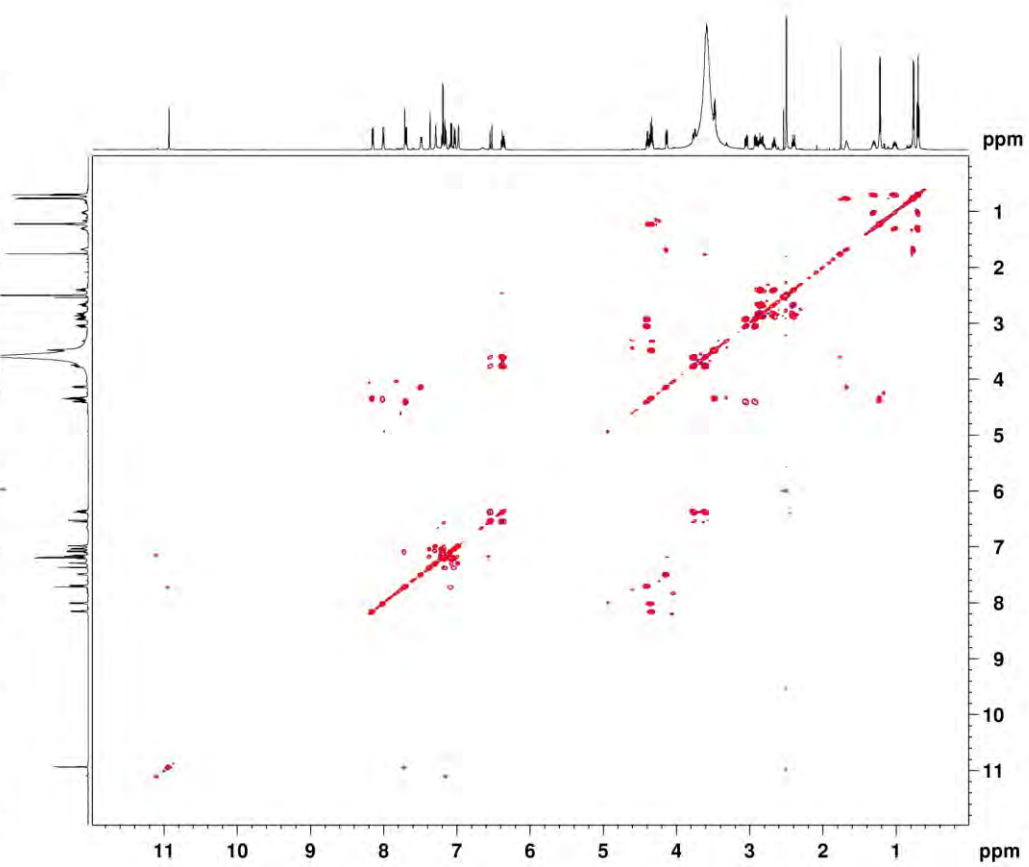



Current Data Parameters  
NAME BC-111-232A  
EXNO 1  
PROCNO 3

F2 - Acquisition Parameters  
Date\_ 20150622  
Time 20:55  
INSTRUM spect  
PROBHD 5 mm TBI5  
PULPROG mvhspph  
TD 2048  
SOLVENT DMSO  
NS 2  
DS 16  
SWH 7789.162 Hz  
FIDRES 3.802814 Hz  
AQ 0.1115216 sec  
RG 1603.5  
DM 64.200 usec  
DE 4.30 usec  
TE 298.2 K  
D0 0.00003710 sec  
D1 1.00000000 sec  
D2 0.06000000 sec  
D3 0.00020700 sec  
D16 0.00020000 sec  
IN0 0.00012860 sec  
L1 24

----- CHANNEL F1 -----  
NUC1 1H  
P1 11.10 usec  
P2 22.50 usec  
P3 26.68 usec  
P6 40.00 usec  
P7 80.00 usec  
P12 3000.00 usec  
P17 2500.00 usec  
PL0 120.00 dB  
PL1 -2.00 dB  
PL2 0.10 dB  
PL3 0.10 dB  
PL4 0.10 dB  
PL5 0.10 dB  
PL6 1000.00 usec  
PL7 0.10 dB  
PL8 0.10 dB  
PL9 0.10 dB  
PL10 0.10 dB  
PL11 0.10 dB  
PL12 0.10 dB  
PL13 0.10 dB  
PL14 0.10 dB  
PL15 0.10 dB  
PL16 0.10 dB  
PL17 0.10 dB  
PL18 0.10 dB  
PL19 0.10 dB  
PL20 0.10 dB  
PL21 0.10 dB  
PL22 0.10 dB  
PL23 0.10 dB  
PL24 0.10 dB  
PL25 0.10 dB  
PL26 0.10 dB  
PL27 0.10 dB  
PL28 0.10 dB  
PL29 0.10 dB  
PL30 0.10 dB  
PL31 0.10 dB  
PL32 0.10 dB  
PL33 0.10 dB  
PL34 0.10 dB  
PL35 0.10 dB  
PL36 0.10 dB  
PL37 0.10 dB  
PL38 0.10 dB  
PL39 0.10 dB  
PL40 0.10 dB  
PL41 0.10 dB  
PL42 0.10 dB  
PL43 0.10 dB  
PL44 0.10 dB  
PL45 0.10 dB  
PL46 0.10 dB  
PL47 0.10 dB  
PL48 0.10 dB  
PL49 0.10 dB  
PL50 0.10 dB  
PL51 0.10 dB  
PL52 0.10 dB  
PL53 0.10 dB  
PL54 0.10 dB  
PL55 0.10 dB  
PL56 0.10 dB  
PL57 0.10 dB  
PL58 0.10 dB  
PL59 0.10 dB  
PL60 0.10 dB  
PL61 0.10 dB  
PL62 0.10 dB  
PL63 0.10 dB  
PL64 0.10 dB  
PL65 0.10 dB  
PL66 0.10 dB  
PL67 0.10 dB  
PL68 0.10 dB  
PL69 0.10 dB  
PL70 0.10 dB  
PL71 0.10 dB  
PL72 0.10 dB  
PL73 0.10 dB  
PL74 0.10 dB  
PL75 0.10 dB  
PL76 0.10 dB  
PL77 0.10 dB  
PL78 0.10 dB  
PL79 0.10 dB  
PL80 0.10 dB  
PL81 0.10 dB  
PL82 0.10 dB  
PL83 0.10 dB  
PL84 0.10 dB  
PL85 0.10 dB  
PL86 0.10 dB  
PL87 0.10 dB  
PL88 0.10 dB  
PL89 0.10 dB  
PL90 0.10 dB  
PL91 0.10 dB  
PL92 0.10 dB  
PL93 0.10 dB  
PL94 0.10 dB  
PL95 0.10 dB  
PL96 0.10 dB  
PL97 0.10 dB  
PL98 0.10 dB  
PL99 0.10 dB  
PL100 0.10 dB

----- GRADIENT CHANNEL -----  
GPNAM1 SINE.100  
GPNAM2 SINE.100  
GPR1 0 %  
GPR2 0 %  
GPR3 0 %  
GPR4 0 %  
GPR5 0 %  
GPR6 0 %  
GPR7 0 %  
GPR8 0 %  
GPR9 0 %  
GPR10 0 %  
GPR11 0 %  
GPR12 0 %  
GPR13 0 %  
GPR14 0 %  
GPR15 0 %  
GPR16 0 %  
GPR17 0 %  
GPR18 0 %  
GPR19 0 %  
GPR20 0 %  
GPR21 0 %  
GPR22 0 %  
GPR23 0 %  
GPR24 0 %  
GPR25 0 %  
GPR26 0 %  
GPR27 0 %  
GPR28 0 %  
GPR29 0 %  
GPR30 0 %  
GPR31 0 %  
GPR32 0 %  
GPR33 0 %  
GPR34 0 %  
GPR35 0 %  
GPR36 0 %  
GPR37 0 %  
GPR38 0 %  
GPR39 0 %  
GPR40 0 %  
GPR41 0 %  
GPR42 0 %  
GPR43 0 %  
GPR44 0 %  
GPR45 0 %  
GPR46 0 %  
GPR47 0 %  
GPR48 0 %  
GPR49 0 %  
GPR50 0 %  
GPR51 0 %  
GPR52 0 %  
GPR53 0 %  
GPR54 0 %  
GPR55 0 %  
GPR56 0 %  
GPR57 0 %  
GPR58 0 %  
GPR59 0 %  
GPR60 0 %  
GPR61 0 %  
GPR62 0 %  
GPR63 0 %  
GPR64 0 %  
GPR65 0 %  
GPR66 0 %  
GPR67 0 %  
GPR68 0 %  
GPR69 0 %  
GPR70 0 %  
GPR71 0 %  
GPR72 0 %  
GPR73 0 %  
GPR74 0 %  
GPR75 0 %  
GPR76 0 %  
GPR77 0 %  
GPR78 0 %  
GPR79 0 %  
GPR80 0 %  
GPR81 0 %  
GPR82 0 %  
GPR83 0 %  
GPR84 0 %  
GPR85 0 %  
GPR86 0 %  
GPR87 0 %  
GPR88 0 %  
GPR89 0 %  
GPR90 0 %  
GPR91 0 %  
GPR92 0 %  
GPR93 0 %  
GPR94 0 %  
GPR95 0 %  
GPR96 0 %  
GPR97 0 %  
GPR98 0 %  
GPR99 0 %  
GPR100 0 %

F1 - Acquisition parameters  
TD 512  
SFO1 600.1329 MHz  
FIDRES 15.21278 Hz  
SW 12.977 ppm  
F4MODE States: 291

F2 - Processing parameters  
SI 4096  
SF 600.1300661 MHz  
WDW EM  
SSB 2  
LB 0 Hz  
GB 0  
PC 1.00

F1 - Processing parameters  
SI 4096  
MC2 States: 291  
SF 600.1300661 MHz  
WDW EM  
SSB 2  
LB 0 Hz  
GB 0

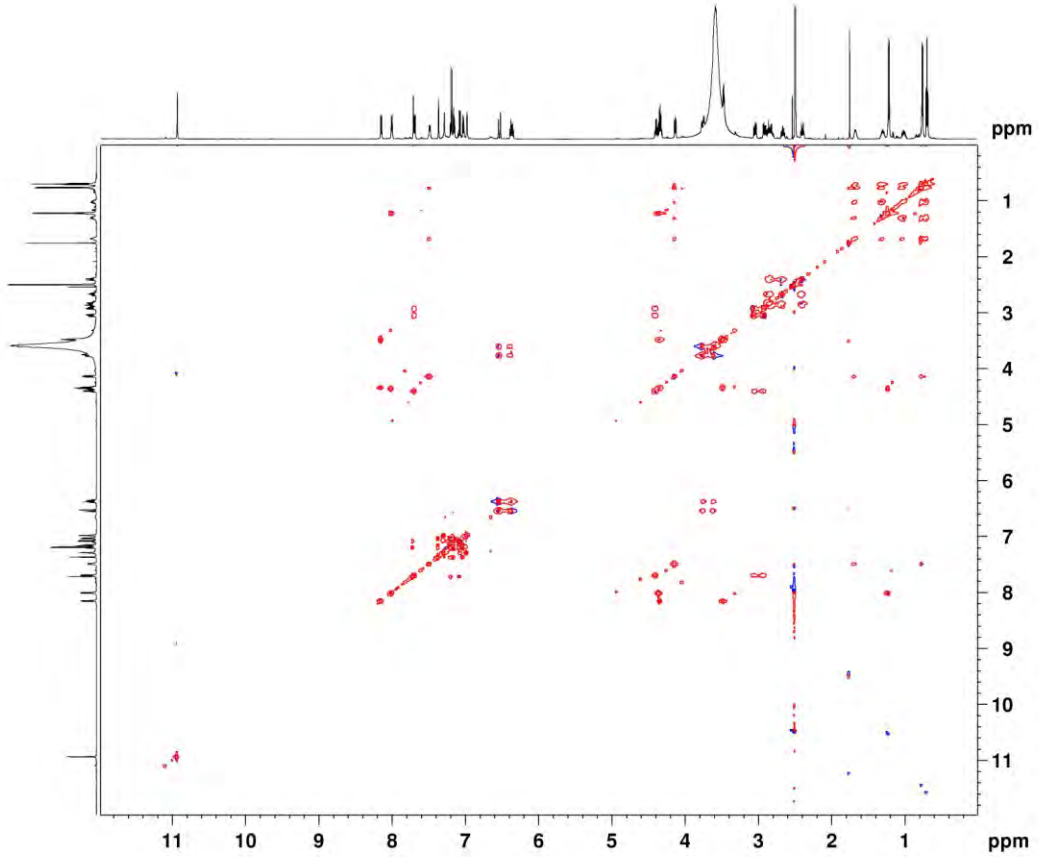

Current Data Parameters  
NAME BC-111-232A  
EXNO 1  
PROCNO 3

F2 - Acquisition Parameters  
Date\_ 20150622  
Time 21:17  
INSTRUM spect  
PROBHD 5 mm TBI5  
PULPROG mvhspph  
TD 2048  
SOLVENT DMSO  
NS 2  
DS 16  
SWH 7789.162 Hz  
FIDRES 3.802814 Hz  
AQ 0.1115216 sec  
RG 1603.5  
DM 64.200 usec  
DE 4.30 usec  
TE 298.2 K  
D0 0.00003710 sec  
D1 1.00000000 sec  
D2 0.06000000 sec  
D3 0.00020700 sec  
D16 0.00020000 sec  
IN0 0.00012860 sec  
L1 24

----- CHANNEL F1 -----  
NUC1 13C  
P1 11.10 usec  
P2 22.50 usec  
P3 26.68 usec  
P6 40.00 usec  
P7 80.00 usec  
P12 3000.00 usec  
P17 2500.00 usec  
PL0 120.00 dB  
PL1 -2.00 dB  
PL2 0.10 dB  
PL3 0.10 dB  
PL4 0.10 dB  
PL5 0.10 dB  
PL6 1000.00 usec  
PL7 0.10 dB  
PL8 0.10 dB  
PL9 0.10 dB  
PL10 0.10 dB  
PL11 0.10 dB  
PL12 0.10 dB  
PL13 0.10 dB  
PL14 0.10 dB  
PL15 0.10 dB  
PL16 0.10 dB  
PL17 0.10 dB  
PL18 0.10 dB  
PL19 0.10 dB  
PL20 0.10 dB  
PL21 0.10 dB  
PL22 0.10 dB  
PL23 0.10 dB  
PL24 0.10 dB  
PL25 0.10 dB  
PL26 0.10 dB  
PL27 0.10 dB  
PL28 0.10 dB  
PL29 0.10 dB  
PL30 0.10 dB  
PL31 0.10 dB  
PL32 0.10 dB  
PL33 0.10 dB  
PL34 0.10 dB  
PL35 0.10 dB  
PL36 0.10 dB  
PL37 0.10 dB  
PL38 0.10 dB  
PL39 0.10 dB  
PL40 0.10 dB  
PL41 0.10 dB  
PL42 0.10 dB  
PL43 0.10 dB  
PL44 0.10 dB  
PL45 0.10 dB  
PL46 0.10 dB  
PL47 0.10 dB  
PL48 0.10 dB  
PL49 0.10 dB  
PL50 0.10 dB  
PL51 0.10 dB  
PL52 0.10 dB  
PL53 0.10 dB  
PL54 0.10 dB  
PL55 0.10 dB  
PL56 0.10 dB  
PL57 0.10 dB  
PL58 0.10 dB  
PL59 0.10 dB  
PL60 0.10 dB  
PL61 0.10 dB  
PL62 0.10 dB  
PL63 0.10 dB  
PL64 0.10 dB  
PL65 0.10 dB  
PL66 0.10 dB  
PL67 0.10 dB  
PL68 0.10 dB  
PL69 0.10 dB  
PL70 0.10 dB  
PL71 0.10 dB  
PL72 0.10 dB  
PL73 0.10 dB  
PL74 0.10 dB  
PL75 0.10 dB  
PL76 0.10 dB  
PL77 0.10 dB  
PL78 0.10 dB  
PL79 0.10 dB  
PL80 0.10 dB  
PL81 0.10 dB  
PL82 0.10 dB  
PL83 0.10 dB  
PL84 0.10 dB  
PL85 0.10 dB  
PL86 0.10 dB  
PL87 0.10 dB  
PL88 0.10 dB  
PL89 0.10 dB  
PL90 0.10 dB  
PL91 0.10 dB  
PL92 0.10 dB  
PL93 0.10 dB  
PL94 0.10 dB  
PL95 0.10 dB  
PL96 0.10 dB  
PL97 0.10 dB  
PL98 0.10 dB  
PL99 0.10 dB  
PL100 0.10 dB

----- GRADIENT CHANNEL -----  
GPNAM1 SINE.100  
GPNAM2 SINE.100  
GPR1 0 %  
GPR2 0 %  
GPR3 0 %  
GPR4 0 %  
GPR5 0 %  
GPR6 0 %  
GPR7 0 %  
GPR8 0 %  
GPR9 0 %  
GPR10 0 %  
GPR11 0 %  
GPR12 0 %  
GPR13 0 %  
GPR14 0 %  
GPR15 0 %  
GPR16 0 %  
GPR17 0 %  
GPR18 0 %  
GPR19 0 %  
GPR20 0 %  
GPR21 0 %  
GPR22 0 %  
GPR23 0 %  
GPR24 0 %  
GPR25 0 %  
GPR26 0 %  
GPR27 0 %  
GPR28 0 %  
GPR29 0 %  
GPR30 0 %  
GPR31 0 %  
GPR32 0 %  
GPR33 0 %  
GPR34 0 %  
GPR35 0 %  
GPR36 0 %  
GPR37 0 %  
GPR38 0 %  
GPR39 0 %  
GPR40 0 %  
GPR41 0 %  
GPR42 0 %  
GPR43 0 %  
GPR44 0 %  
GPR45 0 %  
GPR46 0 %  
GPR47 0 %  
GPR48 0 %  
GPR49 0 %  
GPR50 0 %  
GPR51 0 %  
GPR52 0 %  
GPR53 0 %  
GPR54 0 %  
GPR55 0 %  
GPR56 0 %  
GPR57 0 %  
GPR58 0 %  
GPR59 0 %  
GPR60 0 %  
GPR61 0 %  
GPR62 0 %  
GPR63 0 %  
GPR64 0 %  
GPR65 0 %  
GPR66 0 %  
GPR67 0 %  
GPR68 0 %  
GPR69 0 %  
GPR70 0 %  
GPR71 0 %  
GPR72 0 %  
GPR73 0 %  
GPR74 0 %  
GPR75 0 %  
GPR76 0 %  
GPR77 0 %  
GPR78 0 %  
GPR79 0 %  
GPR80 0 %  
GPR81 0 %  
GPR82 0 %  
GPR83 0 %  
GPR84 0 %  
GPR85 0 %  
GPR86 0 %  
GPR87 0 %  
GPR88 0 %  
GPR89 0 %  
GPR90 0 %  
GPR91 0 %  
GPR92 0 %  
GPR93 0 %  
GPR94 0 %  
GPR95 0 %  
GPR96 0 %  
GPR97 0 %  
GPR98 0 %  
GPR99 0 %  
GPR100 0 %

F1 - Acquisition parameters  
TD 512  
SFO1 150.9234 MHz  
FIDRES 84.72854 Hz  
SW 140.000 ppm  
F4MODE Echo-Anti-echo

F2 - Processing parameters  
SI 4096  
SF 500.1300661 MHz  
WDW EM  
SSB 2  
LB 0 Hz  
GB 0  
PC 1.40

F1 - Processing parameters  
SI 4096  
MC2 echo-anti-echo  
SF 150.923401 MHz  
WDW EM  
SSB 2  
LB 0 Hz  
GB 0

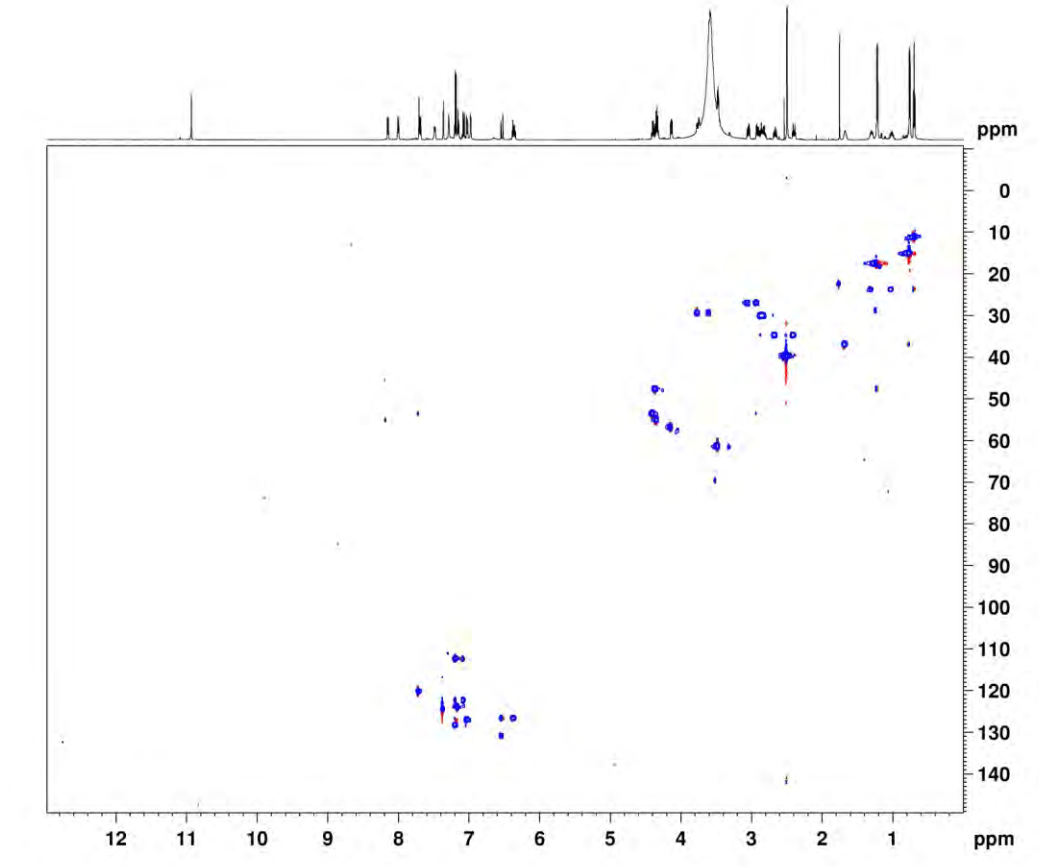

```

Current Data Parameters
NAME: BC-111-232A
EXPNO: 2
PROCNO: 1

F2 - Acquisition Parameters
Date_: 20150602
Time: 23.02
INSTRUM: spect
PROBHD: 5 mm TBI5
PULPROG: mbocpppmodf
TD: 2048
SOLVENT: DMSO
NS: 23
DS: 16
SWH: 7788.142 Hz
FIDRES: 3.802614 Hz
AQ: 0.1315316 sec
RG: 24008
SQ: 84.200 usec
DE: 4.00 usec
TE: 297.4 K
CNS12: 145.0000000
CNS13: 0.0000000
DO: 0.0000300 sec
D1: 1.5000000 sec
D2: 0.00344828 sec
D6: 0.07142857 sec
D16: 0.0002000 sec
IND: 0.00001745 sec

----- CHANNEL f1 -----
NUC1: 1H
P1: 11.13 usec
P2: 22.30 usec
P3: -2.00 dB
PL1W: 89.81071854 W
SFO1: 400.1339008 MHz

----- CHANNEL f2 -----
NUC2: 13C
P3: 19.00 usec
P12: -3.00 dB
PL2W: 150.85417863 W
SFO2: 150.9156357 MHz

----- GRADIENT CHANNEL -----
GPAAM1: SINE.100
GPAAM2: SINE.100
GPAAM3: SINE.100
GPX1: 0 %
GPX2: 0 %
GPX3: 0 %
GPY1: 0 %
GPY2: 0 %
GPY3: 0 %
GPR1: 50.00 %
GPR2: 30.00 %
GPR3: 40.10 %
PI6: 1000.00 usec

F1 - Acquisition parameters
TD: 2048
SFO1: 120.9156 MHz
FIDRES: 112.007638 Hz
SW: 190.000 ppm
P1: 19.00 usec
P2: 22.30 usec
P3: -2.00 dB
PL1W: 89.81071854 W
SFO2: 150.9156357 MHz

F2 - Processing parameters
SI: 4096
SF: 400.1339008 MHz
WDW: ODRING
SSB: 0
LB: 0 Hz
GB: 0
PC: 1.40

F1 - Processing parameters
SI: 4096
SF: 120.9156 MHz
WDW: ODRING
SSB: 0
LB: 0 Hz
GB: 0

```

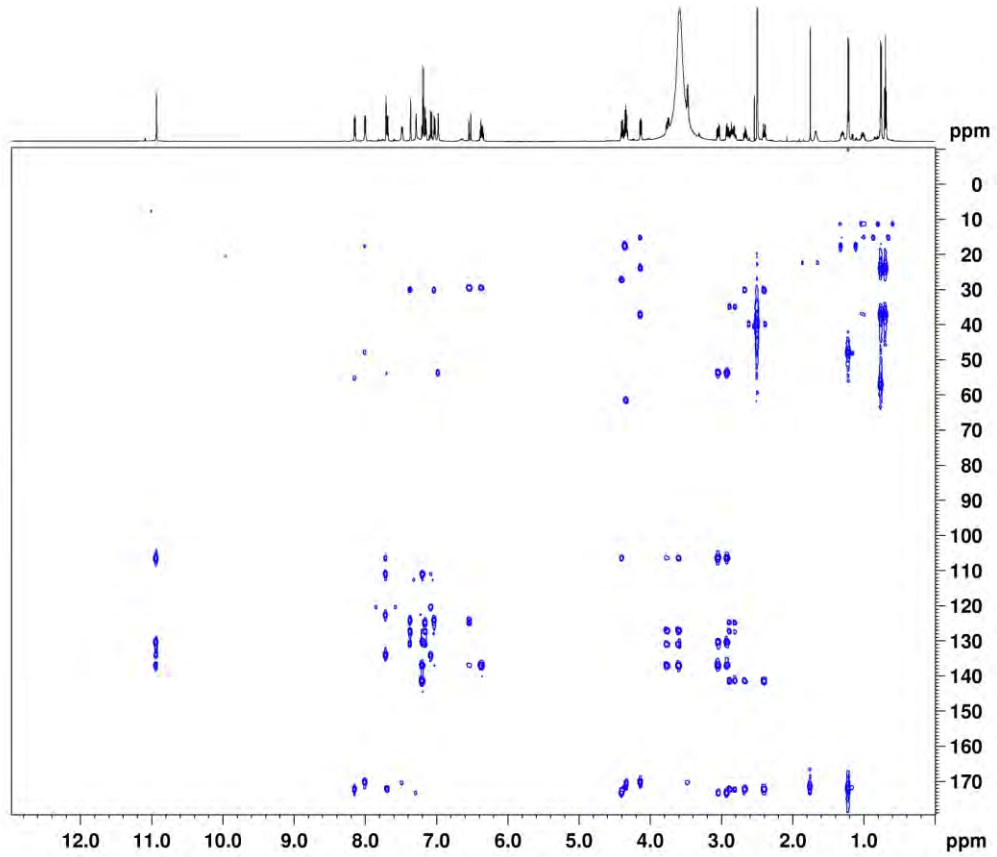

Macrocyclic Product 19b

```

Current Data Parameters
NAME      BC-III-232B2
EXPNO    3
PROCNO   1

F2 - Acquisition Parameters
Date_    20150605
Time     12.49
INSTRUM  av600
PROBHD   5 mm TBI5
PULPROG  zgpr
TD        65536
SOLVENT  DMSO
NS        24
DS        0
SWH       12376.237 Hz
FIDRES    0.188846 Hz
AQ        2.6477044 sec
RG        71.8
DW        40.400 usec
DE        6.50 usec
TE        298.0 K
D1        2.00000000 sec
D12       0.00002000 sec
TD0       1

===== CHANNEL f1 =====
NUC1      1H
P1        9.80 usec
PL1       -2.00 dB
PL9       51.36 dB
PL1W      39.81071854 W
PL9W      0.00018365 W
SFO1      600.1320298 MHz

F2 - Processing parameters
SI        65536
SF        600.1300074 MHz
WDW       EM
SSB       0
LB        0.30 Hz
GB        0
PC        1.00
    
```

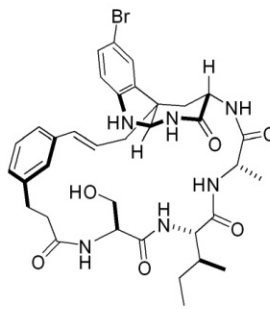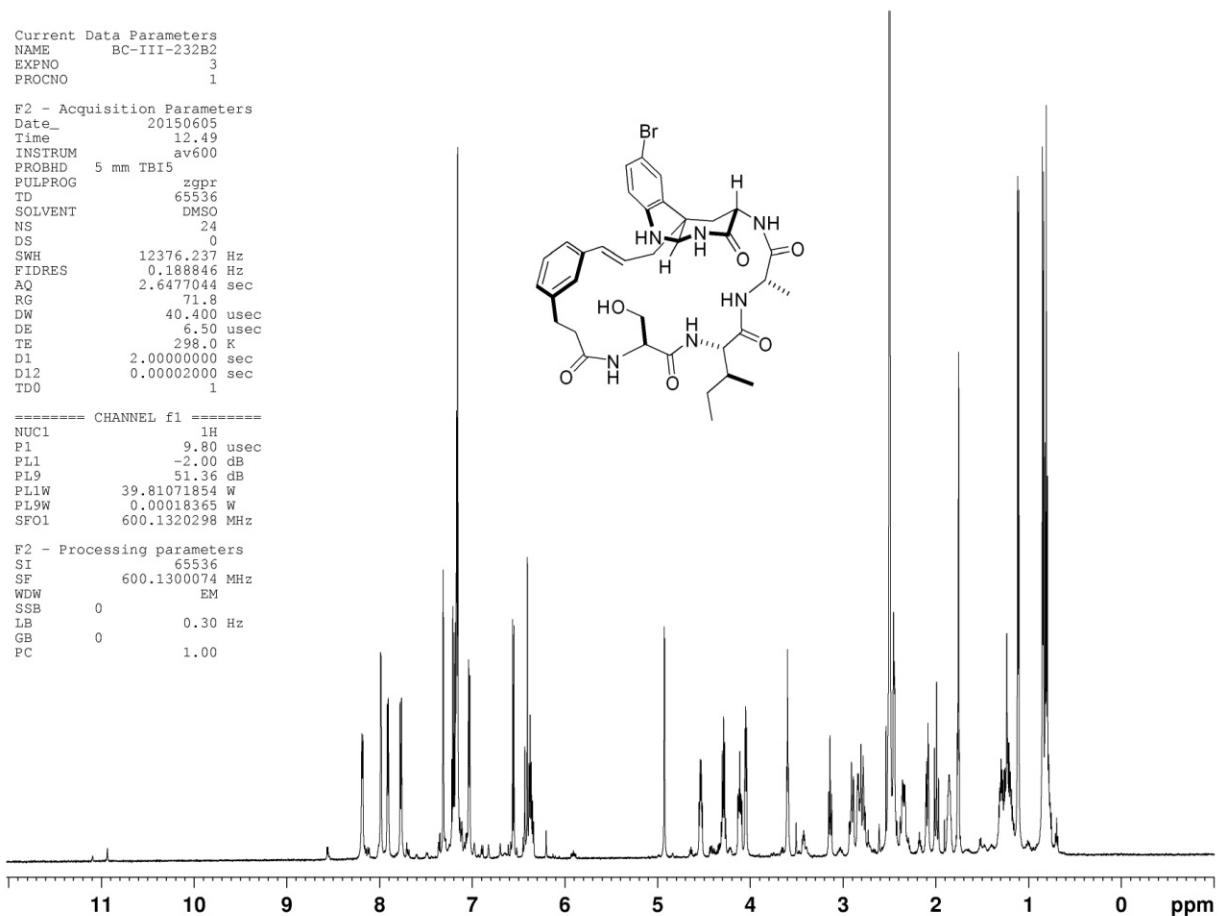

```

Current Data Parameters
NAME      BC-III-232B2
EXPNO    6
PROCNO   1

F2 - Acquisition Parameters
Date_    20150605
Time     13.14
INSTRUM  av600
PROBHD   5 mm TBI5
PULPROG  cosygprqrf
TD        2048
SOLVENT  DMSO
NS        2
DS        16
SWH       7183.908 Hz
FIDRES    3.507768 Hz
AQ        0.1425908 sec
RG        456.1
DW        65.600 usec
DE        6.50 usec
TE        298.0 K
D0        0.00000300 sec
D1        1.00000000 sec
D11       0.03000000 sec
D12       0.00002000 sec
D16       0.00020000 sec
INO       0.00013920 sec

===== CHANNEL f1 =====
NUC1      1H
P0        8.00 usec
P1        9.80 usec
PL1       -2.00 dB
PL9       120.00 dB
PL1W      39.81071854 W
PL9W      0 W
SFO1      600.1336008 MHz

===== GRADIENT CHANNEL =====
GPRAM1   0 % SINE.100
GFX1     0 %
GFY1     0 %
GPZ1     10.00 %
P16      1000.00 usec

F1 - Acquisition parameters
TD        512
SFO1      600.1336 MHz
FIDRES    14.031077 Hz
SW        11.971 ppm
F2MODE    QF

F2 - Processing parameters
SI        4096
SF        600.1300085 MHz
WDW       QSINE
SSB       1.5
LB        0 Hz
GB        0
PC        1.00

F1 - Processing parameters
SI        4096
MC2       QF
SF        600.1300059 MHz
WDW       QSINE
SSB       1.5
LB        0 Hz
GB        0
    
```

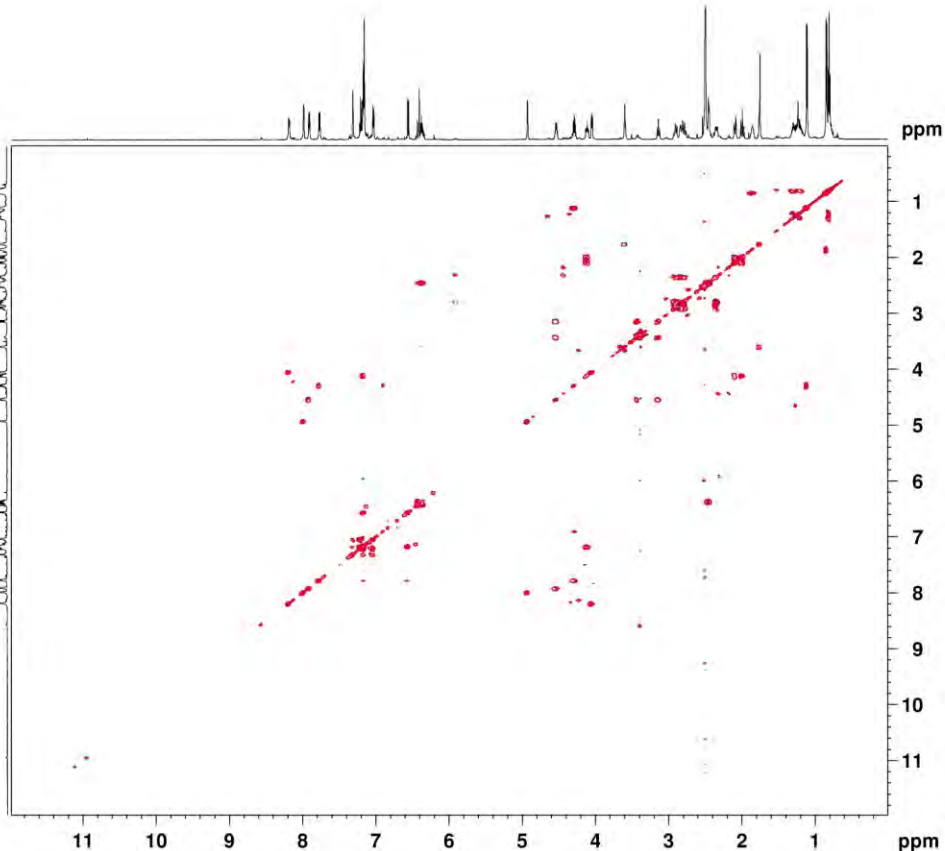

```

Current Data Parameters
NAME      RC-III-23282
EXPNO    1
PROCNO   1

F2 - Acquisition Parameters
Date_    20150609
Time     15.57
INSTRUM  av600
PROBHD   5 mm TB15
PULPROG  mlevpseqph
TD        65536
SOLVENT  DMSO
NS        2
DS        16
SMB       7389.342 Hz
FIDRES   3.802814 Hz
AQ        0.1112316 sec
RG        1625.5
DW        84.200 usec
DE        6.50 usec
TE        298.2 K
D0        0.00053796 sec
D1        2.00000000 sec
D2        0.00000000 sec
D3        1.00000000 sec
D4        0.00020000 sec
D5        0.00020000 sec
D6        0.00020000 sec
D7        0.00020000 sec
D8        0.00020000 sec
D9        0.00020000 sec
D10       0.00020000 sec
D11       0.00020000 sec
D12       0.00020000 sec
D13       0.00020000 sec
D14       0.00020000 sec
D15       0.00020000 sec
D16       0.00020000 sec
D17       0.00020000 sec
D18       0.00020000 sec
D19       0.00020000 sec
D20       0.00020000 sec
D21       0.00020000 sec
D22       0.00020000 sec
D23       0.00020000 sec
D24       0.00020000 sec

```

```

----- CHANNEL f1 -----
NUC1      1H
P1        9.80 usec
P2        19.40 usec
P3        24.68 usec
P4        40.00 usec
P5        40.00 usec
P6        40.00 usec
P7        40.00 usec
P8        3000.00 usec
P9        2500.00 usec
P10       120.00 dB
P11       -2.00 dB
P12       10.22 dB
P13       0 W
P14       39.81071854 W
P15       2.1875118 Hz
SFO1      600.1330066 MHz
SE1       120.00 dB
SFO2      Sqa100.1000
SFO3      1.000
SFO4      -1346.44 Hz

```

```

----- GRADIENT CHANNEL -----
GPNAM1    SINE.100
GPNAM2    SINE.100
GPK1      0 %
GPK2      0 %
GPK3      0 %
GPK4      0 %
GPK5      0 %
GPK6      0 %
GPK7      0 %
GPK8      0 %
GPK9      0 %
GPK10     0 %
GPK11     0 %
GPK12     0 %
GPK13     0 %
GPK14     0 %
GPK15     0 %
GPK16     0 %
GPK17     0 %
GPK18     0 %
GPK19     0 %
GPK20     0 %
GPK21     0 %
GPK22     0 %
GPK23     0 %
GPK24     0 %
GPK25     0 %
GPK26     0 %
GPK27     0 %
GPK28     0 %
GPK29     0 %
GPK30     0 %
GPK31     0 %
GPK32     0 %
GPK33     0 %
GPK34     0 %
GPK35     0 %
GPK36     0 %
GPK37     0 %
GPK38     0 %
GPK39     0 %
GPK40     0 %
GPK41     0 %
GPK42     0 %
GPK43     0 %
GPK44     0 %
GPK45     0 %
GPK46     0 %
GPK47     0 %
GPK48     0 %
GPK49     0 %
GPK50     0 %
GPK51     0 %
GPK52     0 %
GPK53     0 %
GPK54     0 %
GPK55     0 %
GPK56     0 %
GPK57     0 %
GPK58     0 %
GPK59     0 %
GPK60     0 %
GPK61     0 %
GPK62     0 %
GPK63     0 %
GPK64     0 %
GPK65     0 %
GPK66     0 %
GPK67     0 %
GPK68     0 %
GPK69     0 %
GPK70     0 %
GPK71     0 %
GPK72     0 %
GPK73     0 %
GPK74     0 %
GPK75     0 %
GPK76     0 %
GPK77     0 %
GPK78     0 %
GPK79     0 %
GPK80     0 %
GPK81     0 %
GPK82     0 %
GPK83     0 %
GPK84     0 %
GPK85     0 %
GPK86     0 %
GPK87     0 %
GPK88     0 %
GPK89     0 %
GPK90     0 %
GPK91     0 %
GPK92     0 %
GPK93     0 %
GPK94     0 %
GPK95     0 %
GPK96     0 %
GPK97     0 %
GPK98     0 %
GPK99     0 %
GPK100    0 %

```

```

F1 - Acquisition parameters
TD        65536
SFO1      600.1330066 MHz
FIDRES    15.211274 Hz
SW        12.977 ppm
F0MODE    States-33P1

```

```

F2 - Processing parameters
SI         4096
SF         600.1330072 MHz
WDW        QSINE
SSB        2
LB         0 Hz
GB         0
PC         1.00

```

```

F1 - Processing parameters
SI         4096
MCZ        States-33P1
SF         600.1330066 MHz
WDW        QSINE
SSB        2
LB         0 Hz
GB         0
PC         1.00

```

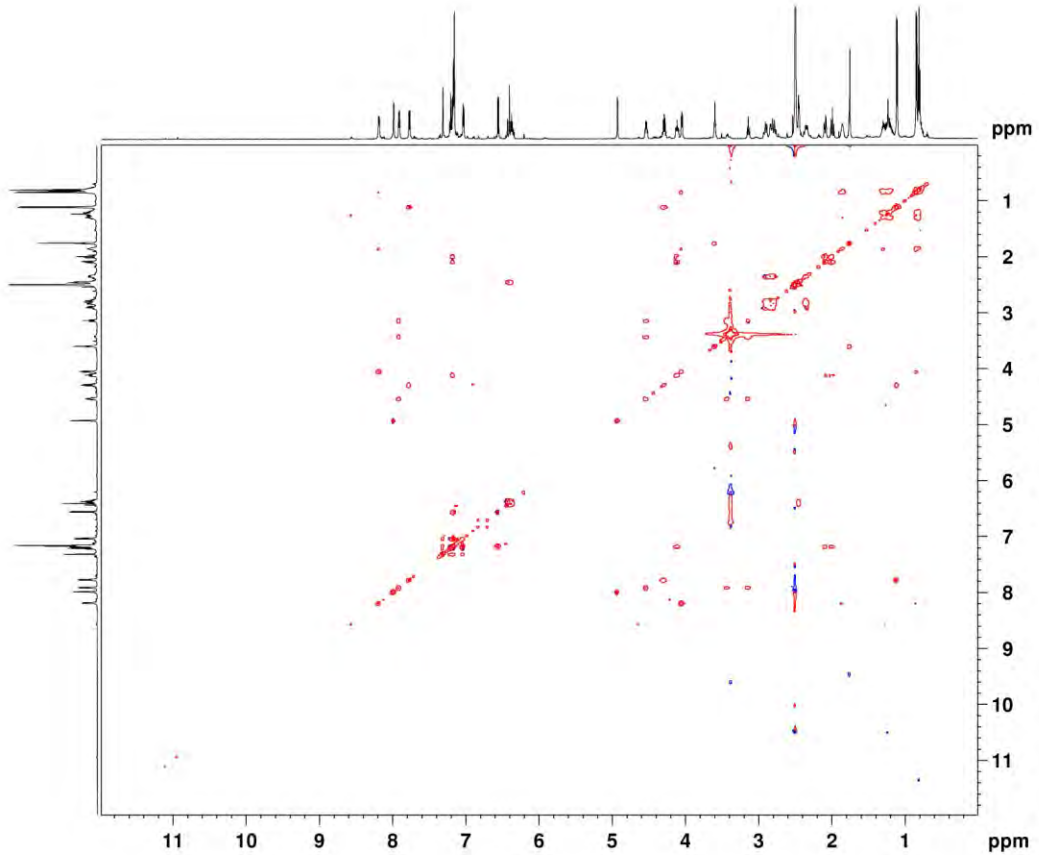

```

Current Data Parameters
NAME      RC-III-23282
EXPNO    13
PROCNO   1

F2 - Acquisition Parameters
Date_    20150724
Time     10.51
INSTRUM  av600
PROBHD   5 mm TB15
PULPROG  mlevpseqph
TD        65536
SOLVENT  DMSO
NS        8
DS        16
SMB       7389.341 Hz
FIDRES   3.569307 Hz
AQ        0.1401332 sec
RG        4597.6
DW        68.400 usec
DE        6.50 usec
TE        298.2 K
D0        0.00055335 sec
D1        2.00000000 sec
D2        0.00000000 sec
D3        1.00000000 sec
D4        0.00000000 sec
D5        0.00000000 sec
D6        0.00020000 sec
D7        0.00020000 sec
D8        0.00020000 sec
D9        0.00020000 sec
D10       0.00020000 sec
D11       0.00020000 sec
D12       0.00020000 sec
D13       0.00020000 sec
D14       0.00020000 sec
D15       0.00020000 sec
D16       0.00020000 sec
D17       0.00020000 sec
D18       0.00020000 sec
D19       0.00020000 sec
D20       0.00020000 sec
D21       0.00020000 sec
D22       0.00020000 sec
D23       0.00020000 sec
D24       0.00020000 sec

```

```

----- CHANNEL f1 -----
NUC1      1H
P1        10.25 usec
P2        20.50 usec
P3        3000.00 usec
P4        120.00 dB
P5        -2.00 dB
P6        0 W
P7        39.81071854 W
P8        2.1875118 Hz
SFO1      600.1330066 MHz
SE1       120.00 dB
SFO2      Sqa100.1000
SFO3      1.000
SFO4      -1031.36 Hz

```

```

----- GRADIENT CHANNEL -----
GPNAM1    SINE.100
GPNAM2    SINE.100
GPK1      0 %
GPK2      0 %
GPK3      0 %
GPK4      0 %
GPK5      0 %
GPK6      0 %
GPK7      0 %
GPK8      0 %
GPK9      0 %
GPK10     0 %
GPK11     0 %
GPK12     0 %
GPK13     0 %
GPK14     0 %
GPK15     0 %
GPK16     0 %
GPK17     0 %
GPK18     0 %
GPK19     0 %
GPK20     0 %
GPK21     0 %
GPK22     0 %
GPK23     0 %
GPK24     0 %
GPK25     0 %
GPK26     0 %
GPK27     0 %
GPK28     0 %
GPK29     0 %
GPK30     0 %
GPK31     0 %
GPK32     0 %
GPK33     0 %
GPK34     0 %
GPK35     0 %
GPK36     0 %
GPK37     0 %
GPK38     0 %
GPK39     0 %
GPK40     0 %
GPK41     0 %
GPK42     0 %
GPK43     0 %
GPK44     0 %
GPK45     0 %
GPK46     0 %
GPK47     0 %
GPK48     0 %
GPK49     0 %
GPK50     0 %
GPK51     0 %
GPK52     0 %
GPK53     0 %
GPK54     0 %
GPK55     0 %
GPK56     0 %
GPK57     0 %
GPK58     0 %
GPK59     0 %
GPK60     0 %
GPK61     0 %
GPK62     0 %
GPK63     0 %
GPK64     0 %
GPK65     0 %
GPK66     0 %
GPK67     0 %
GPK68     0 %
GPK69     0 %
GPK70     0 %
GPK71     0 %
GPK72     0 %
GPK73     0 %
GPK74     0 %
GPK75     0 %
GPK76     0 %
GPK77     0 %
GPK78     0 %
GPK79     0 %
GPK80     0 %
GPK81     0 %
GPK82     0 %
GPK83     0 %
GPK84     0 %
GPK85     0 %
GPK86     0 %
GPK87     0 %
GPK88     0 %
GPK89     0 %
GPK90     0 %
GPK91     0 %
GPK92     0 %
GPK93     0 %
GPK94     0 %
GPK95     0 %
GPK96     0 %
GPK97     0 %
GPK98     0 %
GPK99     0 %
GPK100    0 %

```

```

F1 - Acquisition parameters
TD        65536
SFO1      600.1330066 MHz
FIDRES    28.533777 Hz
SW        12.161 ppm
F0MODE    States-TFPI

```

```

F2 - Processing parameters
SI         4096
SF         600.1330066 MHz
WDW        QSINE
SSB        2
LB         0 Hz
GB         0
PC         1.00

```

```

F1 - Processing parameters
SI         4096
MCZ        States-TFPI
SF         600.1330066 MHz
WDW        QSINE
SSB        2
LB         0 Hz
GB         0
PC         1.00

```

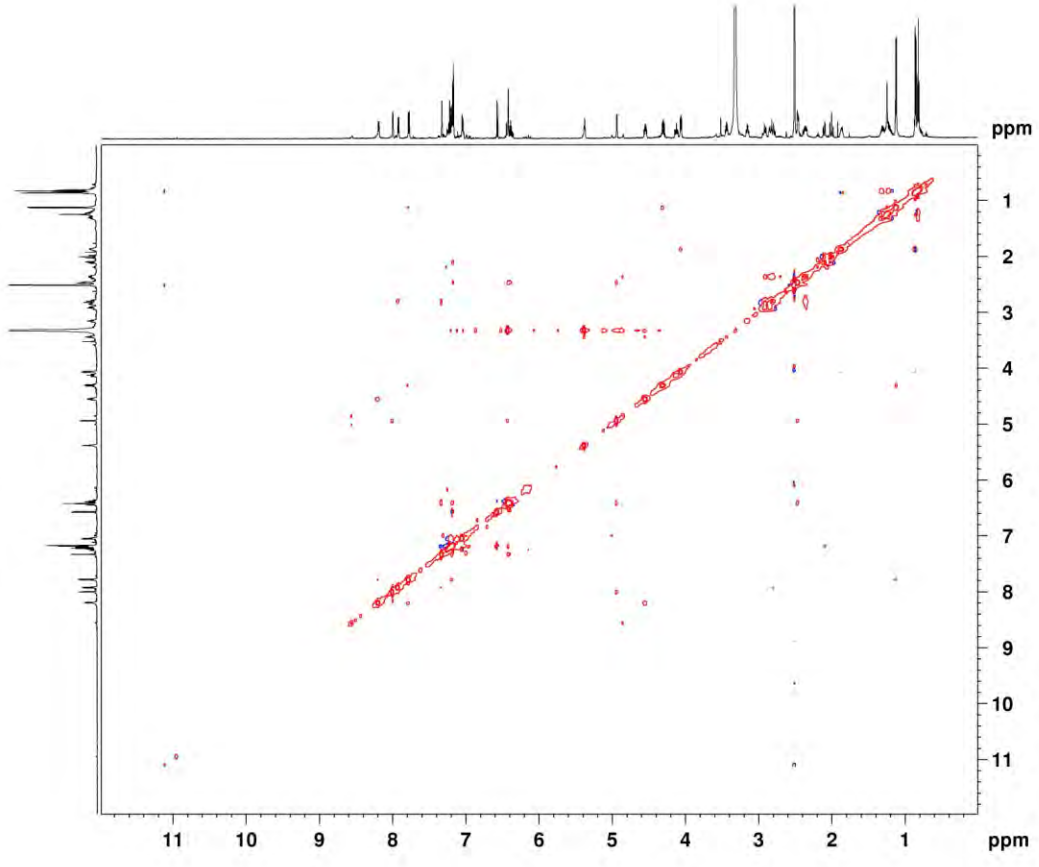



Macrocyclic Product 19c

```

Current Data Parameters
NAME      BC-III-232C1
EXPNO    3
PROCNO   1

F2 - Acquisition Parameters
Date_    20150622
Time     15.54
INSTRUM  av600
PROBHD   5 mm TBI5
PULPROG  zgpr
TD        65536
SOLVENT  DMSO
NS        16
DS        0
SWH       12376.237 Hz
FIDRES    0.188846 Hz
AQ        2.6477044 sec
RG        90.5
DW        40.400 usec
DE        6.50 usec
TE        298.0 K
D1        2.00000000 sec
D12       0.00002000 sec
TD0       1
  
```

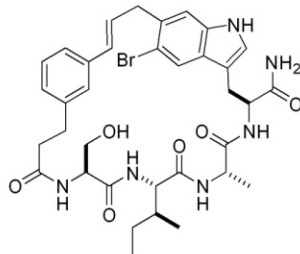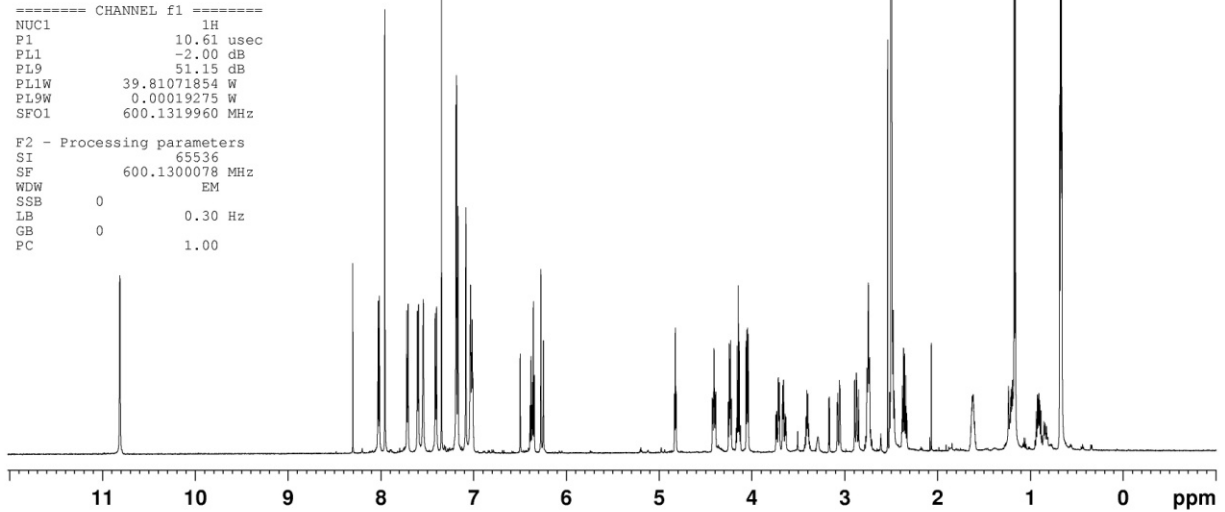

```

Current Data Parameters
NAME      BC-III-232C1
EXPNO    6
PROCNO   1

F2 - Acquisition Parameters
Date_    20150622
Time     15.57
INSTRUM  av600
PROBHD   5 mm TBI5
PULPROG  cosygpprqrqf
TD        2048
SOLVENT  DMSO
NS        2
DS        16
SWH       7183.908 Hz
FIDRES    3.507768 Hz
AQ        0.1425508 sec
RG        456.1
DW        65.600 usec
DE        6.50 usec
TE        298.0 K
D0        0.00000300 sec
D1        1.00000000 sec
D11       0.03000000 sec
D12       0.00002000 sec
D16       0.00020000 sec
IN0       0.00013920 sec
  
```

```

----- CHANNEL f1 -----
NUC1     1H
P1       8.00 usec
PL1      -2.00 dB
PL9      120.00 dB
PL1W     39.81071854 W
PL9W     0 W
SFO1     600.1336008 MHz
  
```

```

----- GRADIENT CHANNEL -----
GPRAM1   SINE.100
GPX1     0 %
GPY1     0 %
GPZ1     10.00 %
P16      1000.00 usec
  
```

```

F1 - Acquisition parameters
TD        512
SFO1     600.1336 MHz
FIDRES    14.031077 Hz
SW        11.971 ppm
FhMODE    QF
  
```

```

F2 - Processing parameters
SI       4096
SF       600.1300068 MHz
WDW      QSINE
SSB      1.5
LB       0 Hz
GB       0
PC       1.00
  
```

```

F1 - Processing parameters
SI       4096
MC2      QF
SF       600.1300072 MHz
WDW      QSINE
SSB      1.5
LB       0 Hz
GB       0
  
```

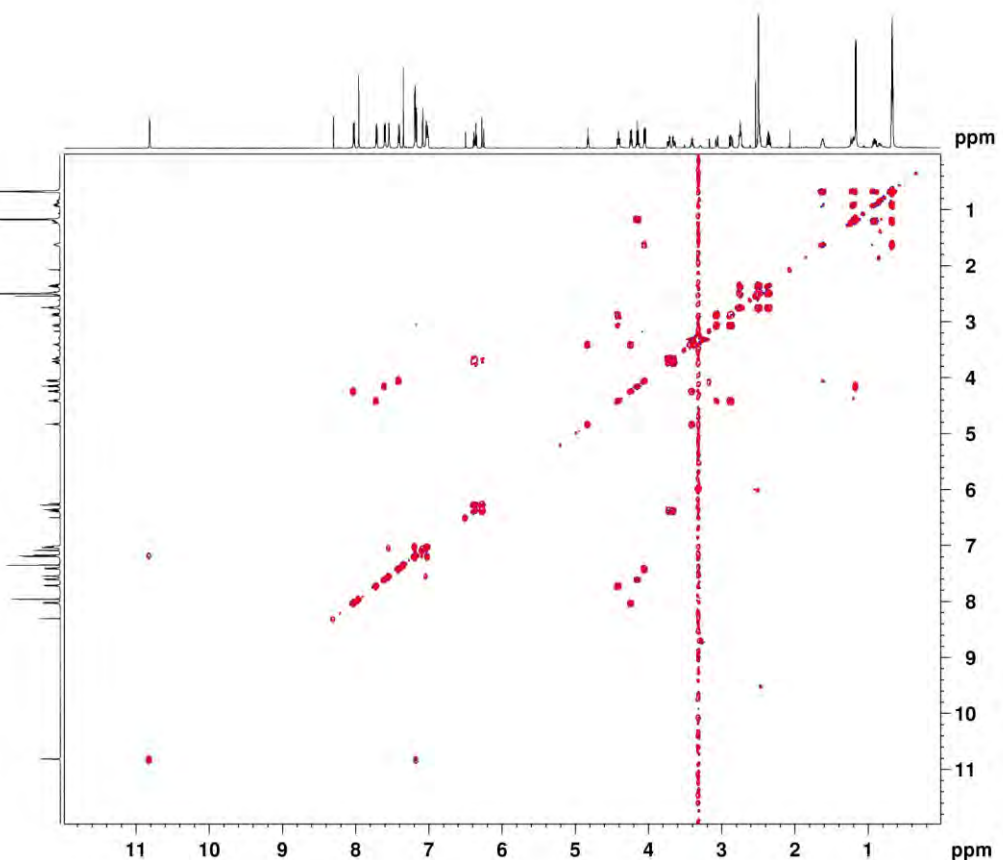

```

Current Data Parameters
NAME      EC-111-232C1
EXPNO    7
PROCNO   1

F2 - Acquisition Parameters
Date_    20150622
Time     16:18
INSTRUM  av600
PROBHD   5 mm TBI3
PULPROG  zgpg30
TD        65536
SOLVENT  DMSO
NS        2
DS        4
SWH       7789.162 Hz
FIDRES   3.802814 Hz
AQ        0.1315318 sec
RG        327.0
DW        64.200 usec
DE        4.50 usec
TE        298.0 K
DO        0.00002745 sec
D1        1.00000000 sec
D2        0.06000000 sec
D3        0.00000000 sec
D16       0.00000000 sec
D19       0.00012840 sec
SI        24

----- CHANNEL F1 -----
NUC1      1H
P1        10.61 usec
P2        21.22 usec
P3        26.48 usec
P6        40.00 usec
P7        85.00 usec
P12       3050.00 usec
P17       2500.00 usec
PL0       120.00 dB
PL1       -2.00 dB
PL10      0.00 dB
PL19      0 W
PL1W      39.81071854 W
PL2W      2.79898343 W
SFO1      600.1339056 MHz
SFO2      125.0000000 MHz
SFNAM1    equal100.1000
SFNAM2    equal1.0000
SFOFF1    -1056.44 Hz

----- GRADIENT CHANNEL -----
GPNAM1    SINE.100
GPNAM2    SINE.100
GPR1      0 %
GPR2      0 %
GPR3      0 %
GPR4      0 %
GPR5      0 %
GPR6      0 %
GPR7      0 %
GPR8      0 %
GPR9      0 %
GPR10     0 %
GPR11     0 %
GPR12     0 %
GPR13     0 %
GPR14     0 %
GPR15     0 %
GPR16     0 %
GPR17     0 %
GPR18     0 %
GPR19     0 %
GPR20     0 %
GPR21     31.00 %
GPR22     11.00 %
GPR23     1000.00 usec

F1 - Acquisition parameters
TD        512
SFO1      600.1339 MHz
FIDRES   15.211276 Hz
SW        12.971 ppm
PROBHD   State-131

F2 - Processing parameters
SI        4096
SF        600.1339056 MHz
WDW       EM
SSB       0
LB        0 Hz
GB        0
PC        1.00

F1 - Processing parameters
SI        4096
SF        600.1339056 MHz
WDW       EM
SSB       0
LB        0 Hz
GB        0
PC        1.00

```

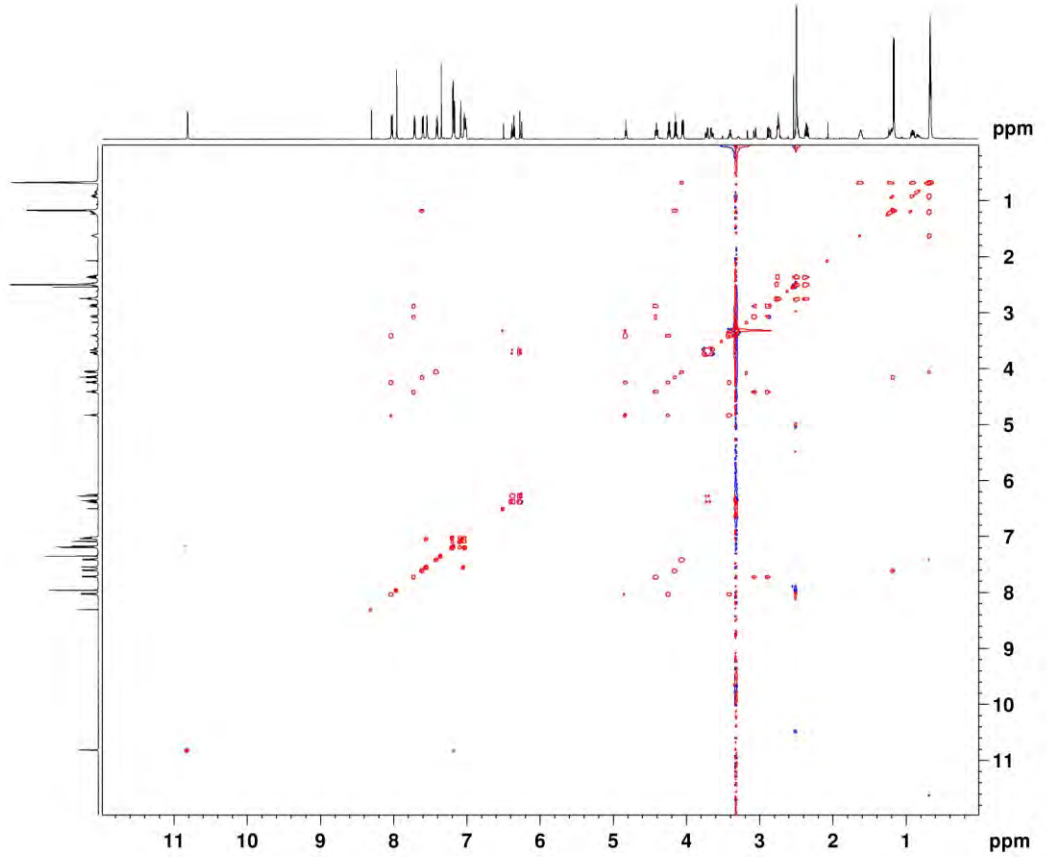

```

Current Data Parameters
NAME      EC-111-232C1
EXPNO    8
PROCNO   1

F2 - Acquisition Parameters
Date_    20150622
Time     16:40
INSTRUM  av600
PROBHD   5 mm TBI3
PULPROG  zgpg30
TD        65536
SOLVENT  DMSO
NS        2
DS        4
SWH       7789.162 Hz
FIDRES   3.802814 Hz
AQ        0.1315318 sec
RG        327.0
DW        64.200 usec
DE        4.50 usec
TE        298.0 K
DO        0.00002745 sec
D1        1.00000000 sec
D2        0.06000000 sec
D3        0.00000000 sec
D16       0.00000000 sec
D19       0.00012840 sec
SI        24

----- CHANNEL F1 -----
NUC1      13C
P1        19.41 usec
P2        21.22 usec
P3        1000.00 usec
P6        -2.00 dB
PL1W      39.81071854 W
SFO1      600.1339056 MHz

----- CHANNEL F2 -----
GPNAM1    SINE.100
GPNAM2    SINE.100
GPR1      0 %
GPR2      0 %
GPR3      0 %
GPR4      0 %
GPR5      0 %
GPR6      0 %
GPR7      0 %
GPR8      0 %
GPR9      0 %
GPR10     0 %
GPR11     0 %
GPR12     0 %
GPR13     0 %
GPR14     0 %
GPR15     0 %
GPR16     0 %
GPR17     0 %
GPR18     0 %
GPR19     0 %
GPR20     0 %
GPR21     95.00 %
GPR22     20.10 %
GPR23     1000.00 usec

F1 - Acquisition parameters
TD        214
SFO1      150.91314 MHz
FIDRES   84.820884 Hz
SW        180.000 ppm
PROBHD   State-131

F2 - Processing parameters
SI        4096
SF        600.1339056 MHz
WDW       EM
SSB       0
LB        0 Hz
GB        0
PC        1.40

F1 - Processing parameters
SI        4096
SF        150.9131372 MHz
WDW       EM
SSB       0
LB        0 Hz
GB        0
PC        1.40

```

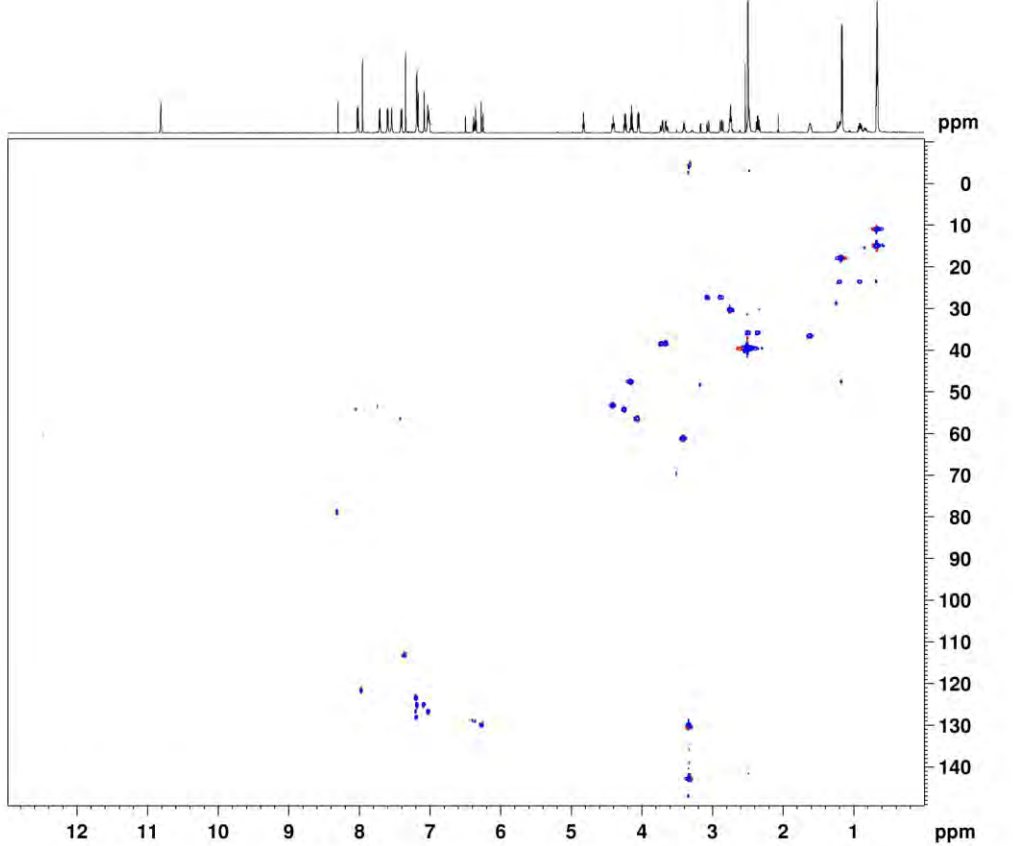

```

Current Data Parameters
NAME: SE-111-232C1
EXTNO: 9
PROCNO: 1

F2 - Acquisition Parameters
Date_: 20150602
Time: 17.50
INSTRUM: spect
PROBHD: 5 mm TBI5
PULPROG: mbocpppmodf
TD: 2048
SOLVENT: DMSO
NS: 15
DS: 16
SWH: 7788.142 Hz
FIDRES: 3.802614 Hz
AQ: 0.1315316 sec
RG: 24008
DQW: 84.200 usec
DE: 6.00 usec
TE: 297.4 K
CMT02: 145.0000000
CMT03: 0.0000000
DO: 0.0000300 sec
D1: 1.5000000 sec
D2: 0.00344828 sec
D6: 0.07142857 sec
D16: 0.0002000 sec
IND: 0.00001745 sec

----- CHANNEL f1 -----
NUC1: 1H
P1: 10.00 usec
P2: 21.22 usec
PL1: -2.00 dB
PL12: 89.81071854 W
SFO1: 400.139008 MHz

----- CHANNEL f2 -----
NUC2: 13C
P3: 19.00 usec
P12: -3.00 dB
PL12: 150.3517065 W
SFO2: 150.9156357 MHz

----- GRADIENT CHANNEL -----
GPA1M1: SINE.100
GPA1M2: SINE.100
GPA1M3: SINE.100
GFX1: 0 %
GFX2: 0 %
GFX3: 0 %
GPF1: 0 %
GPF2: 0 %
GPF3: 0 %
GPR1: 50.00 %
GPR2: 30.00 %
GPR3: 40.10 %
PI6: 1000.00 usec

F1 - Acquisition parameters
TD: 247
SFO1: 120.9154 MHz
FIDRES: 116.086931 Hz
SW: 190.000 ppm
P1: 0.0000000 sec

F2 - Processing parameters
SI: 4096
SF: 400.1390084 MHz
WDW: Q5SINE
SSB: 0
LB: 0 Hz
GB: 0
PC: 1.40

F1 - Processing parameters
SI: 4096
SF: 120.9154 MHz
WDW: Q5SINE
SSB: 0
LB: 0 Hz
GB: 0

```

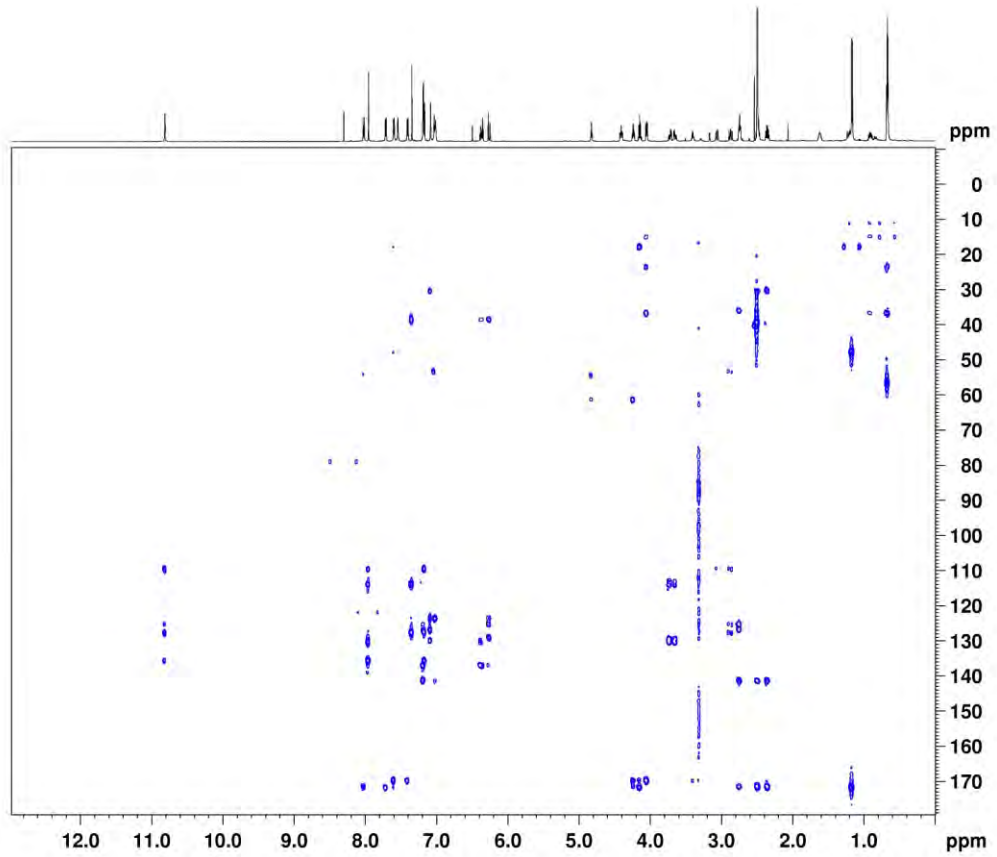



Macroyclic Product 19d

Current Data Parameters  
 NAME BC-III-232E  
 EXPNO 2  
 PROCNO 1

F2 - Acquisition Parameters  
 Date\_ 20150601  
 Time 19.46  
 INSTRUM av600  
 PROBHD 5 mm TBI5  
 PULPROG zg  
 TD 65536  
 SOLVENT DMSO  
 NS 16  
 DS 0  
 SWH 12376.237 Hz  
 FIDRES 0.188846 Hz  
 AQ 2.6477044 sec  
 RG 22.6  
 DW 40.400 usec  
 DE 6.50 usec  
 TE 298.0 K  
 D1 2.00000000 sec  
 TD0 1

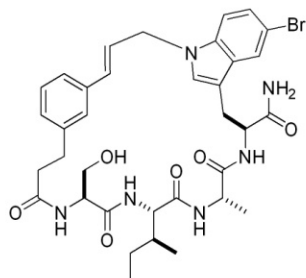

===== CHANNEL f1 =====  
 NUC1 1H  
 P1 10.27 usec  
 PL1 -2.00 dB  
 PL1W 39.81071854 W  
 SFO1 600.1336008 MHz

F2 - Processing parameters  
 SI 65536  
 SF 600.1300077 MHz  
 WDW EM  
 SSB 0  
 LB 0.30 Hz  
 GB 0  
 PC 1.00

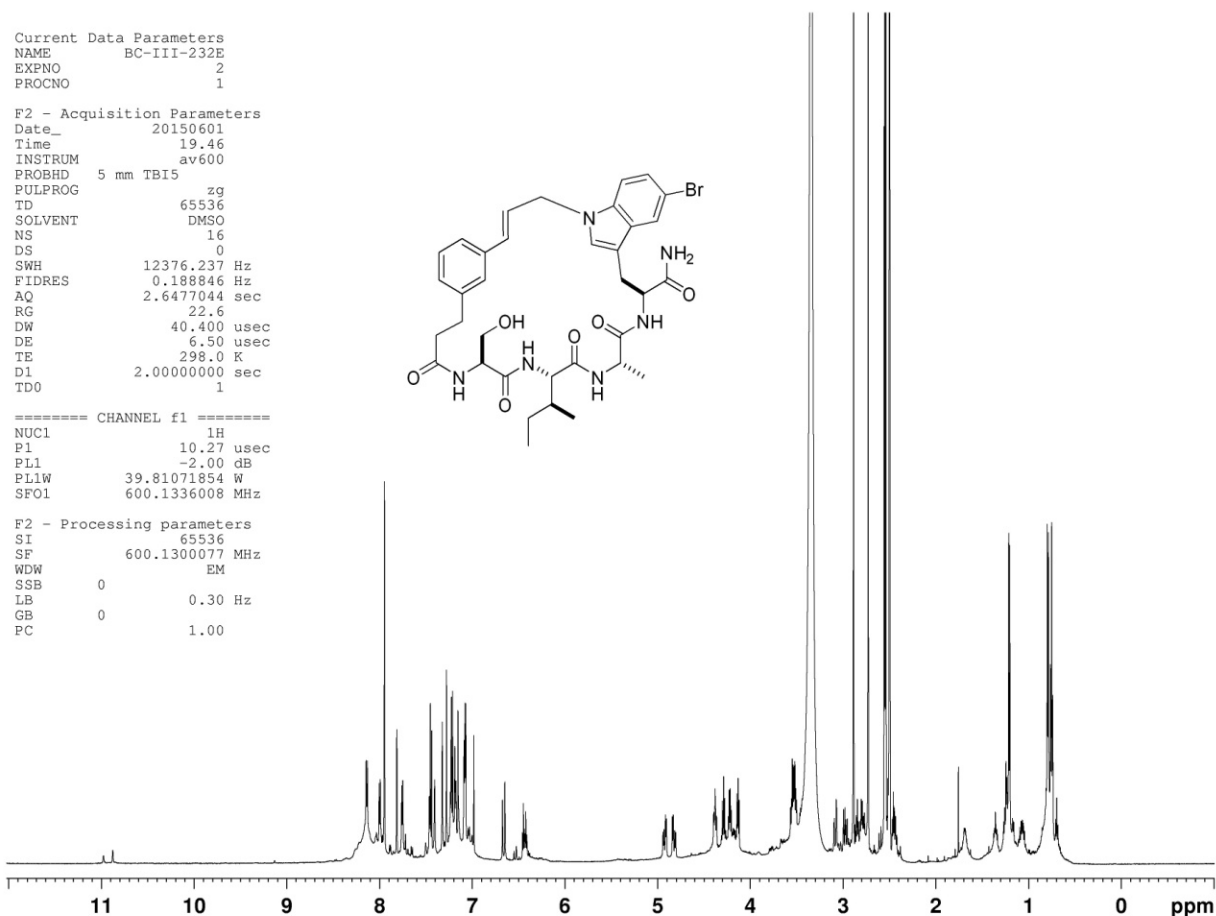

Current Data Parameters  
 NAME BC-III-232E  
 EXPNO 6  
 PROCNO 1

F2 - Acquisition Parameters  
 Date\_ 20150601  
 Time 19.56  
 INSTRUM av600  
 PROBHD 5 mm TBI5  
 PULPROG cosygppprqf  
 TD 2048  
 SOLVENT DMSO  
 NS 2  
 DS 16  
 SWH 7183.908 Hz  
 FIDRES 3.507768 Hz  
 AQ 0.1425908 sec  
 RG 456.1  
 DW 69.600 usec  
 DE 6.50 usec  
 TE 298.0 K  
 D0 0.00000300 sec  
 D1 1.00000000 sec  
 D11 0.03000000 sec  
 D12 0.00002000 sec  
 D16 0.00020000 sec  
 INO 0.00013920 sec

===== CHANNEL f1 =====  
 NUC1 1H  
 P0 8.00 usec  
 P1 10.27 usec  
 PL1 -2.00 dB  
 PL9 120.00 dB  
 PL1W 39.81071854 W  
 PL9W 0 W  
 SFO1 600.1336008 MHz

===== GRADIENT CHANNEL =====  
 GPAM1 SINE.100  
 GPC1 0 %  
 GPC2 0 %  
 GPC3 10.00 %  
 P16 1000.00 usec

F1 - Acquisition parameters  
 TD 512  
 SFO1 600.1336 MHz  
 FIDRES 14.031077 Hz  
 SW 11.971 ppm  
 FhMODE OF

F2 - Processing parameters  
 SI 4096  
 SF 600.1300083 MHz  
 WDW QSINE  
 SSB 1.5  
 LB 0 Hz  
 GB 0  
 PC 1.00

F1 - Processing parameters  
 SI 4096  
 MC2 OF  
 SF 600.1300082 MHz  
 WDW  
 SSB 1.5  
 LB 0 Hz  
 GB 0

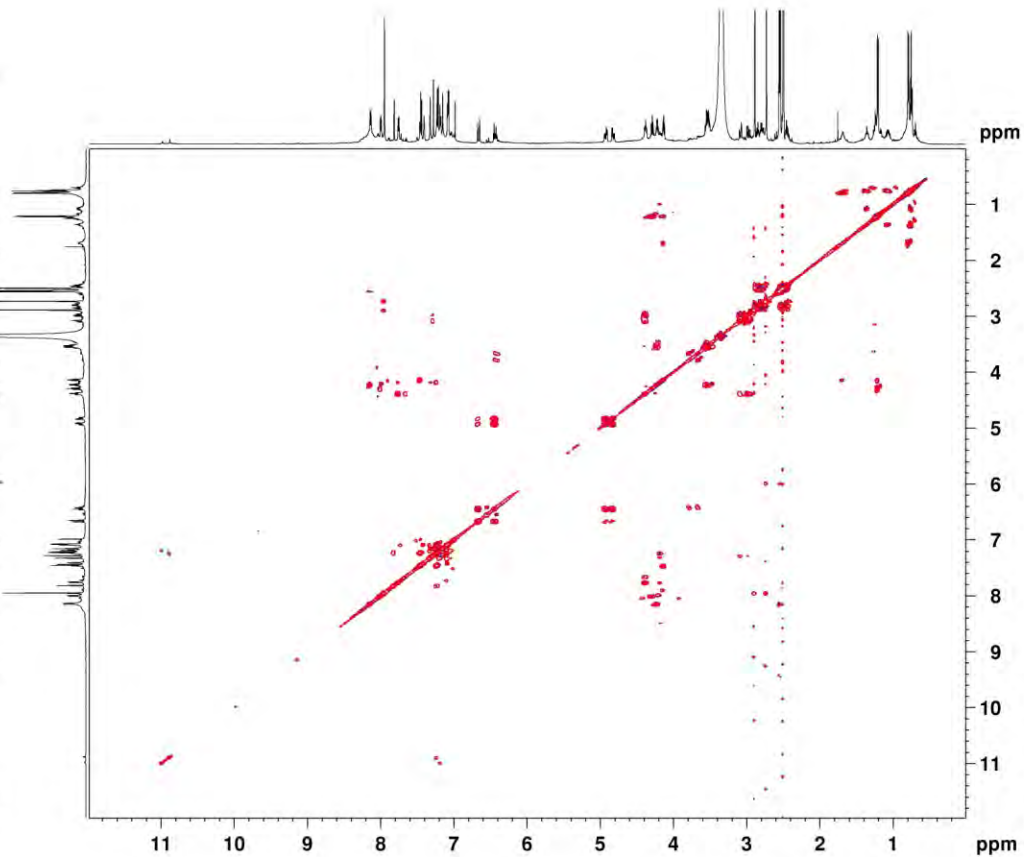

```

Current Data Parameters
NAME      20-111-1232
EXPNO    7
PROCNO   1

F2 - Acquisition Parameters
Date_    20150401
Time     20:17
INSTRUM  spect
PROBHD   5 mm TBI3
PULPROG  zgpg30
TD        65536
SOLVENT  DMSO
NS        2
DS        4
SWH       7788.162 Hz
FIDRES    3.802934 Hz
AQ        0.1315316 sec
RG         1625.5
RW         84.300 usec
DE         6.50 usec
TE        300.2 K
D0         0.00053766 sec
D1         3.00050000 sec
D9         0.00050000 sec
D12        0.00052000 sec
D16        0.00050000 sec
LNU       0.00012868 sec
LI        24

===== CHANNEL F1 =====
NUC1      1H
P1         30.27 usec
P2         20.54 usec
P3         20.48 usec
P6         40.00 usec
P7         80.00 usec
P12        3000.00 usec
P17        7500.00 usec
PL1        120.00 dB
PL12       -2.00 dB
PL16       9.83 dB
PL17       0 W
PL18       39.81071854 W
PL19       2.42421822 W
SFO1       600.1320000 MHz
SFO2       120.000 MHz
SFO3       800.1320000 MHz
SFO4       120.000 MHz
SFO5       1.000 MHz
SFO6       -1456.44 Hz

===== GRADIENT CHANNEL =====
GMRAG1    SINE.100
GMRAG2    SINE.100
GFX1      0 %
GFX2      0 %
GFY1      0 %
GFY2      0 %
GZ1        31.00 %
GZ2        11.00 %
F16       1000.00 usec

F1 - Acquisition parameters
TD         327
SFO1       600.1329 MHz
FIDRES     15.21276 Hz
SW         12.977 ppm
F2MODE     States-TPPI

F2 - Processing parameters
SI         4096
SF         600.1300000 MHz
WDW        QSINE
SSB        2
LB         0 Hz
GB         0
PC         1.00

F1 - Processing parameters
SI         4096
MC2        States-TPPI
SF         600.1300000 MHz
WDW        QSINE
SSB        2
LB         0 Hz
GB         0
PC         1.00

```

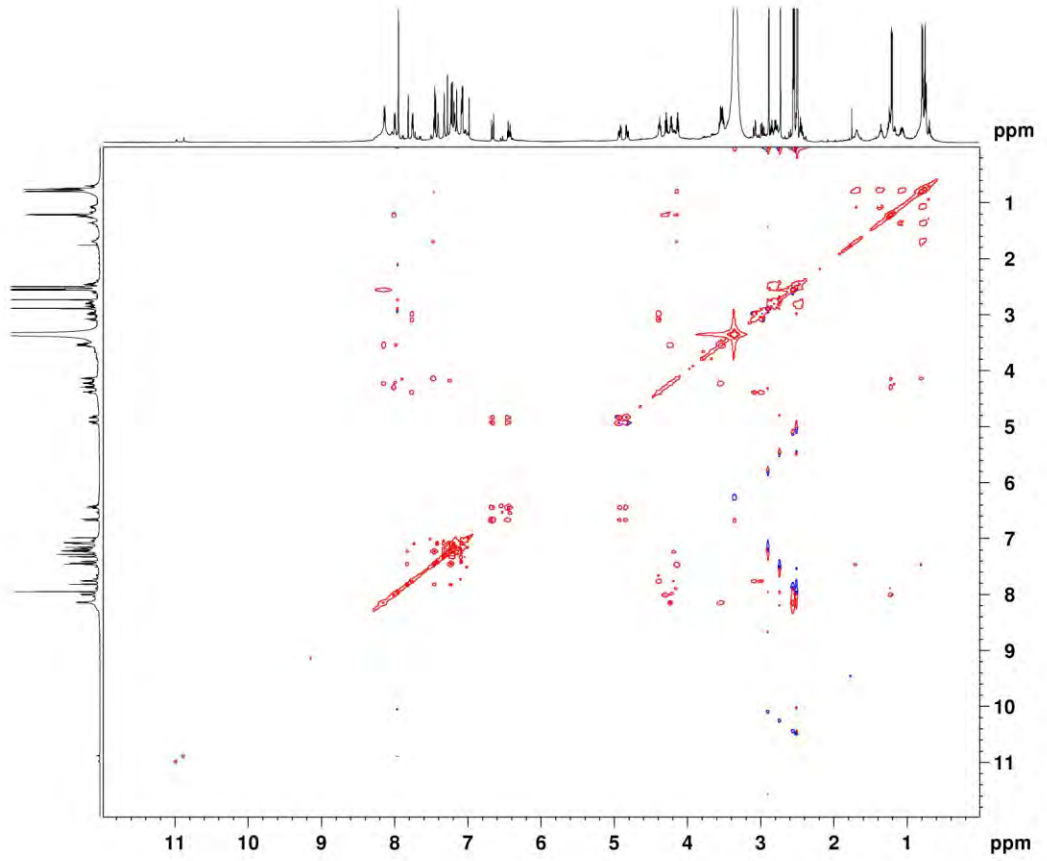

```

Current Data Parameters
NAME      20-111-1232
EXPNO    8
PROCNO   1

F2 - Acquisition Parameters
Date_    20150401
Time     20:40
INSTRUM  spect
PROBHD   5 mm TBI3
PULPROG  zgpg30
TD        65536
SOLVENT  DMSO
NS        2
DS        4
SWH       7788.162 Hz
FIDRES    3.802934 Hz
AQ        0.1315316 sec
RG         1625.5
RW         84.300 usec
DE         6.50 usec
TE        300.2 K
D0         0.00053766 sec
D1         3.00050000 sec
D9         0.00050000 sec
D12        0.00052000 sec
D16        0.00050000 sec
LNU       0.00012868 sec
LI        24

===== CHANNEL F1 =====
NUC1      1H
P1         30.27 usec
P2         20.54 usec
P3         20.48 usec
P6         40.00 usec
P7         80.00 usec
P12        3000.00 usec
P17        7500.00 usec
PL1        120.00 dB
PL12       -2.00 dB
PL16       9.83 dB
PL17       0 W
PL18       39.81071854 W
PL19       2.42421822 W
SFO1       600.1320000 MHz
SFO2       120.000 MHz
SFO3       800.1320000 MHz
SFO4       120.000 MHz
SFO5       1.000 MHz
SFO6       -1456.44 Hz

===== GRADIENT CHANNEL =====
GMRAG1    SINE.100
GMRAG2    SINE.100
GFX1      0 %
GFX2      0 %
GFY1      0 %
GFY2      0 %
GZ1        31.00 %
GZ2        11.00 %
F16       1000.00 usec

F1 - Acquisition parameters
TD         327
SFO1       600.1329 MHz
FIDRES     15.21276 Hz
SW         12.977 ppm
F2MODE     States-TPPI

F2 - Processing parameters
SI         4096
SF         600.1300000 MHz
WDW        QSINE
SSB        2
LB         0 Hz
GB         0
PC         1.00

F1 - Processing parameters
SI         4096
MC2        States-TPPI
SF         600.1300000 MHz
WDW        QSINE
SSB        2
LB         0 Hz
GB         0
PC         1.00

```

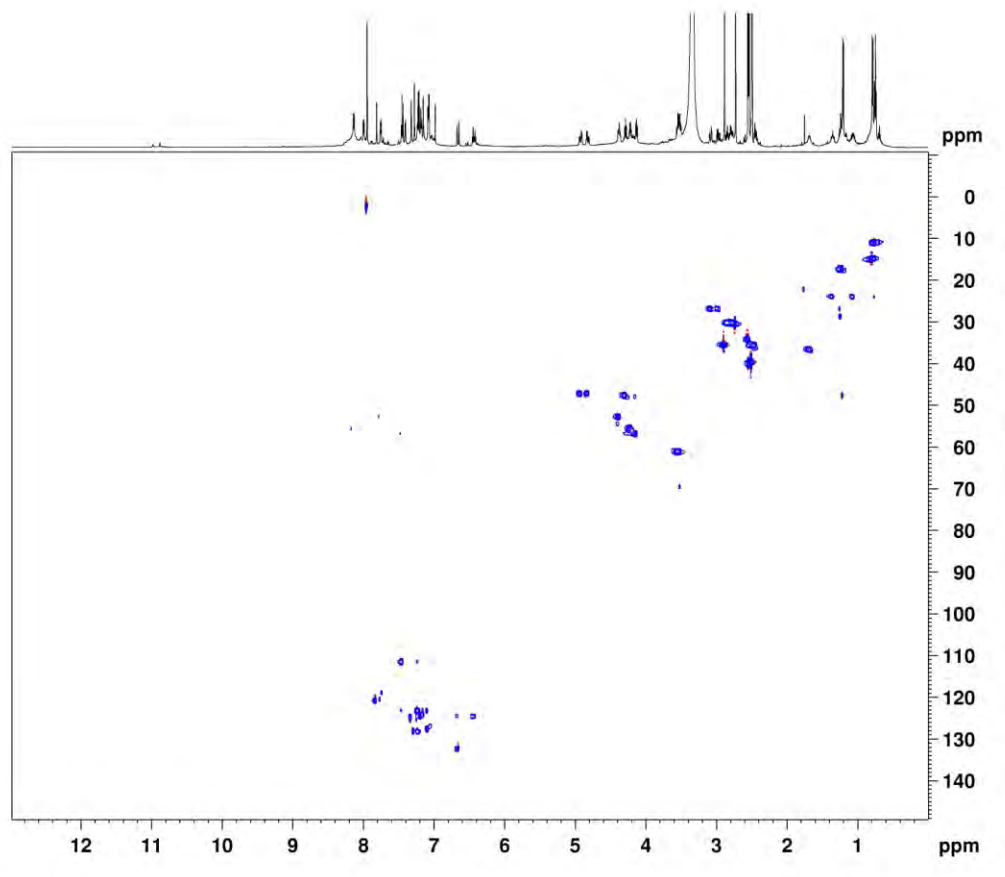

```

Current Data Parameters
NAME      BC-111-2328
EXPNO    1
PROCNO   1

F2 - Acquisition Parameters
Date_    20150601
Time     22:59
INSTRUM  spect
PROBHD   5 mm QNP
PULPROG  zgpg30
TD        65536
SOLVENT  DMSO
NS        30
DS        16
SWH       7788.162 Hz
FIDRES   0.0004614 Hz
AQ        0.1315314 sec
RG         24008
AQ        0.0002000 sec
SF        600.1350000 MHz
TE        297.2 K
CNP12    145.0000000
CNP13    7.0000000
D0        0.0000000 sec
d1        1.500000000 sec
d2        0.0034628 sec
d4        0.0112387 sec
d16       0.0002000 sec
LMD       0.0001745 sec

----- CHANNEL f1 -----
NUC1      1H
P1         10.27 usec
P2         20.54 usec
SFO1      500.1350000 MHz
SFO2      150.1545000 MHz

----- CHANNEL f2 -----
NUC2      13C
P3         19.35 usec
P12        -3.00 dB
P12W      150.35617045 W
SFO2      101.6261260 MHz

----- GRADIENT CHANNELS -----
GPM1      SINE.100
GPM2      SINE.100
GPM3      SINE.100
GPR1      0 %
GPR2      0 %
GPR3      0 %
GPR4      0 %
GPR5      0 %
GPR6      0 %
GPR7      0 %
GPR8      0 %
GPR9      0 %
GPR10     0 %
GPR11     0 %
GPR12     0 %
GPR13     0 %
GPR14     0 %
GPR15     0 %
GPR16     0 %
GPR17     0 %
GPR18     0 %
GPR19     0 %
GPR20     0 %
GPR21     0 %
GPR22     0 %
GPR23     0 %
GPR24     0 %
GPR25     0 %
GPR26     0 %
GPR27     0 %
GPR28     0 %
GPR29     0 %
GPR30     0 %
GPR31     0 %
GPR32     0 %
GPR33     0 %
GPR34     0 %
GPR35     0 %
GPR36     0 %
GPR37     0 %
GPR38     0 %
GPR39     0 %
GPR40     0 %
GPR41     0 %
GPR42     0 %
GPR43     0 %
GPR44     0 %
GPR45     0 %
GPR46     0 %
GPR47     0 %
GPR48     0 %
GPR49     0 %
GPR50     0 %
GPR51     0 %
GPR52     0 %
GPR53     0 %
GPR54     0 %
GPR55     0 %
GPR56     0 %
GPR57     0 %
GPR58     0 %
GPR59     0 %
GPR60     0 %
GPR61     0 %
GPR62     0 %
GPR63     0 %
GPR64     0 %
GPR65     0 %
GPR66     0 %
GPR67     0 %
GPR68     0 %
GPR69     0 %
GPR70     0 %
GPR71     0 %
GPR72     0 %
GPR73     0 %
GPR74     0 %
GPR75     0 %
GPR76     0 %
GPR77     0 %
GPR78     0 %
GPR79     0 %
GPR80     0 %
GPR81     0 %
GPR82     0 %
GPR83     0 %
GPR84     0 %
GPR85     0 %
GPR86     0 %
GPR87     0 %
GPR88     0 %
GPR89     0 %
GPR90     0 %
GPR91     0 %
GPR92     0 %
GPR93     0 %
GPR94     0 %
GPR95     0 %
GPR96     0 %
GPR97     0 %
GPR98     0 %
GPR99     0 %
GPR100    0 %

F1 - Acquisition parameters
TD         65536
SFO1      500.1350000 MHz
SFO2      150.1545000 MHz
SF         600.1350000 MHz
AQ         0.1315314 sec
RG         24008
AQ         0.0002000 sec
SF         600.1350000 MHz
TE         297.2 K

F2 - Processing parameters
SI         4096
SF         600.1350000 MHz
WDW        EM
SSB        0
GB         0 Hz
DR         0
FC         1.40

F1 - Processing parameters
SI         4096
SF         500.1350000 MHz
WDW        EM
SSB        0
GB         0 Hz
DR         0
FC         1.40

```

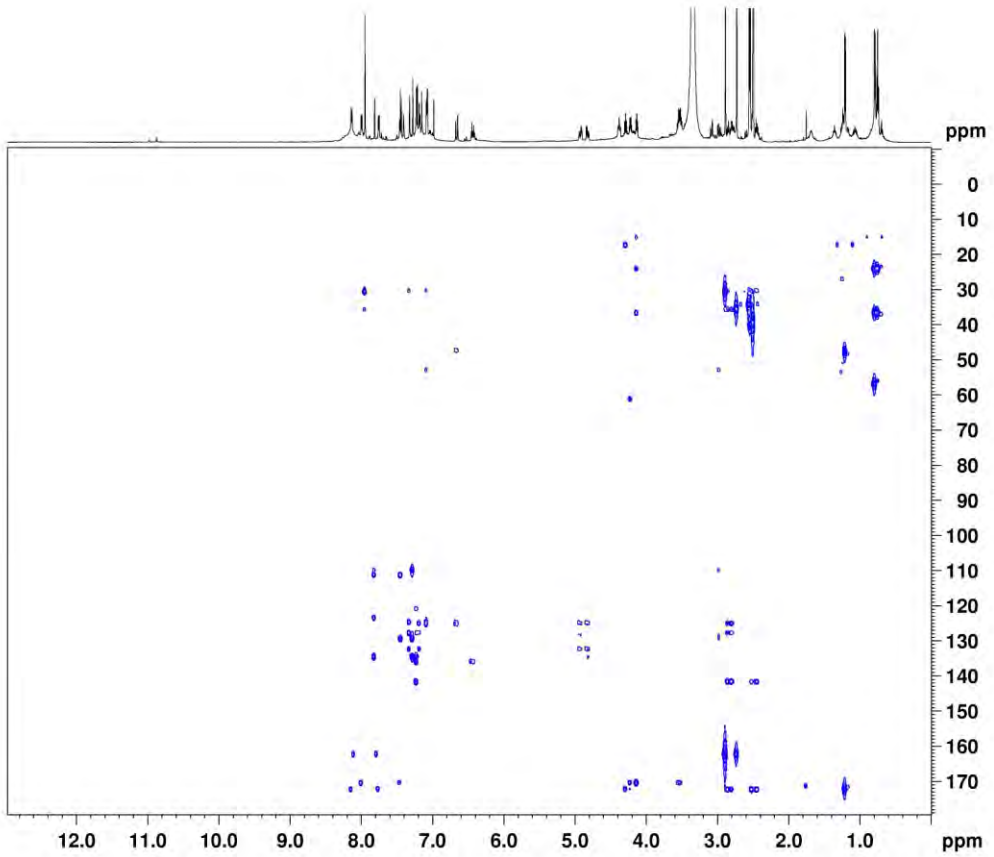

Acyclic Precursor S1

Current Data Parameters  
 NAME TR6-164  
 EXPNO 1  
 PROCNO 1

F2 - Acquisition Parameters  
 Date\_ 20160219  
 Time 10.28  
 INSTRUM av600  
 PROBHD 5 mm BB5  
 PULPROG zg  
 TD 65536  
 SOLVENT DMSO  
 NS 8  
 DS 0  
 SWH 12376.237 Hz  
 FIDRES 0.188846 Hz  
 AQ 2.6476543 sec  
 RG 57  
 DW 40.400 usec  
 DE 6.50 usec  
 TE 296.2 K  
 D1 2.00000000 sec  
 TDO 1

===== CHANNEL f1 =====  
 NUC1 1H  
 P1 16.00 usec  
 PL1 -1.00 dB  
 PL1W 31.62277603 W  
 SFO1 600.1336008 MHz

F2 - Processing parameters  
 SI 65536  
 SF 600.1300057 MHz  
 WDW EM  
 SSB 0  
 LB 0.30 Hz  
 GB 0  
 PC 1.00

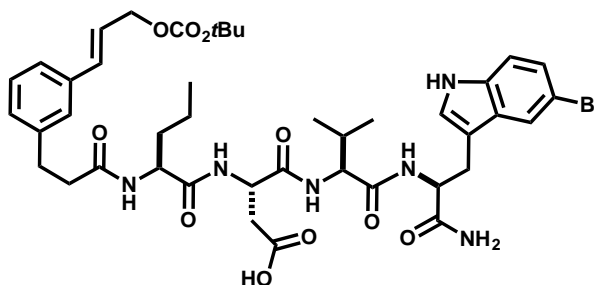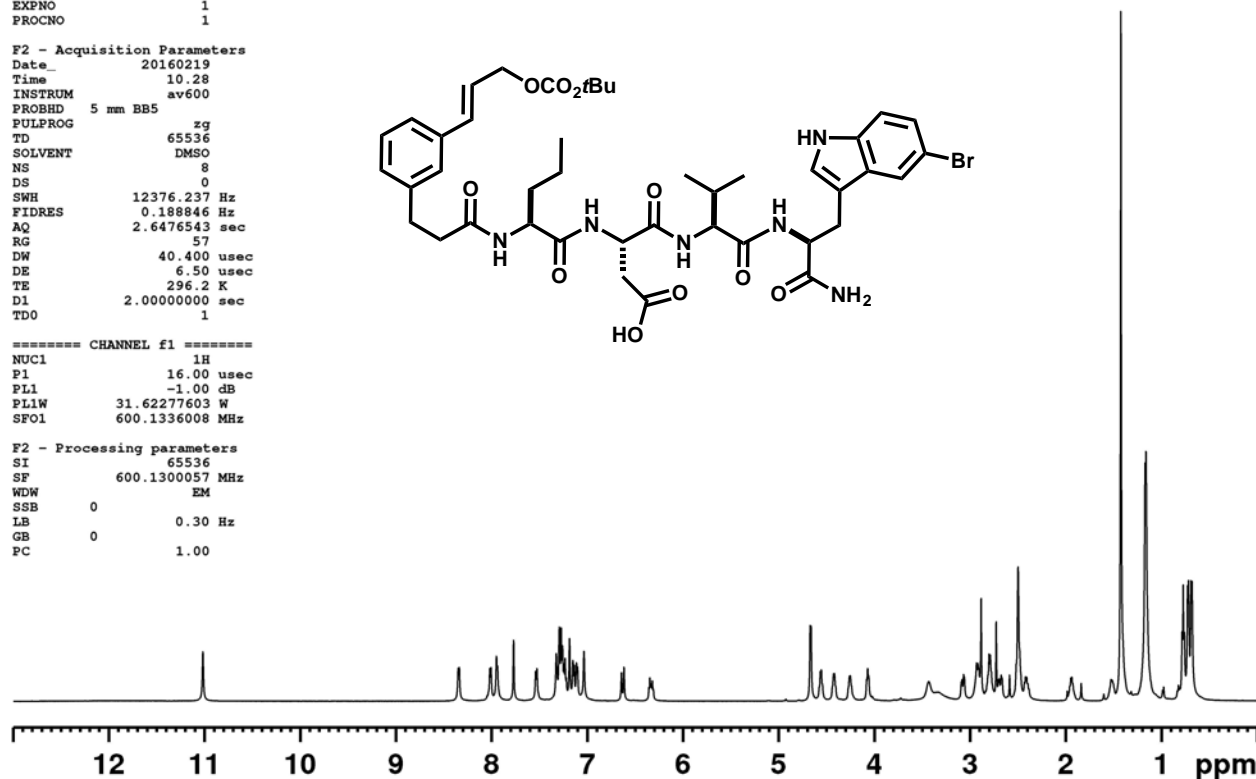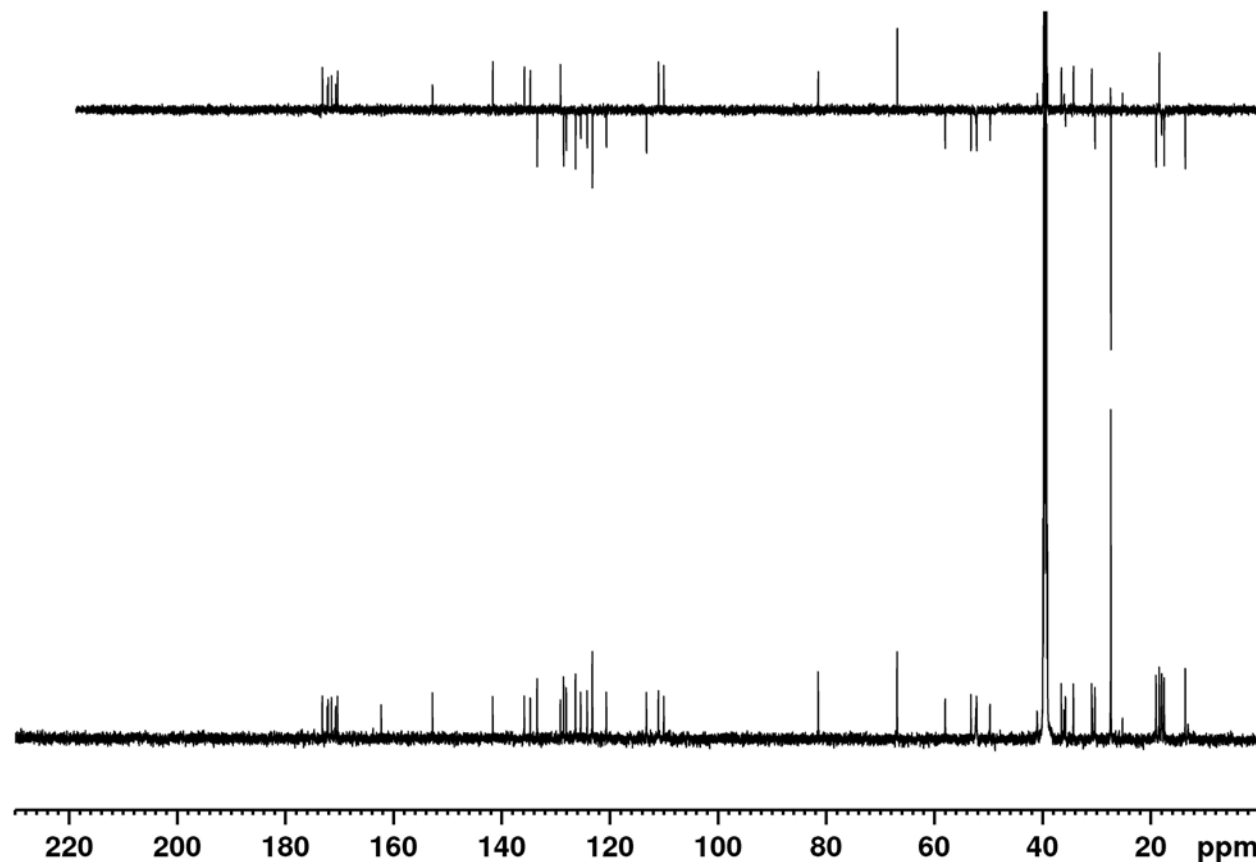

Macroyclic Product S2a

Current Data Parameters  
 NAME TR6-186B2  
 EXPNO 2  
 PROCNO 1

F2 - Acquisition Parameters  
 Date\_ 20160210  
 Time 13.03  
 INSTRUM av600  
 PROBHD 5 mm TBI5  
 PULPROG zg  
 TD 65536  
 SOLVENT DMSO  
 NS 8  
 DS 0  
 SWH 12376.237 Hz  
 FIDRES 0.188846 Hz  
 AQ 2.6476543 sec  
 RG 71.8  
 DW 40.400 usec  
 DE 6.50 usec  
 TE 298.0 K  
 D1 2.00000000 sec  
 TD0 1

===== CHANNEL f1 =====  
 NUC1 1H  
 P1 10.05 usec  
 PL1 -2.00 dB  
 PL1W 39.81071854 W  
 SFO1 600.1336008 MHz

F2 - Processing parameters  
 SI 65536  
 SF 600.1300071 MHz  
 WDW EM  
 SSB 0  
 LB 0.30 Hz  
 GB 0  
 PC 1.00

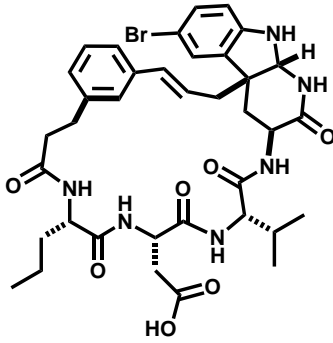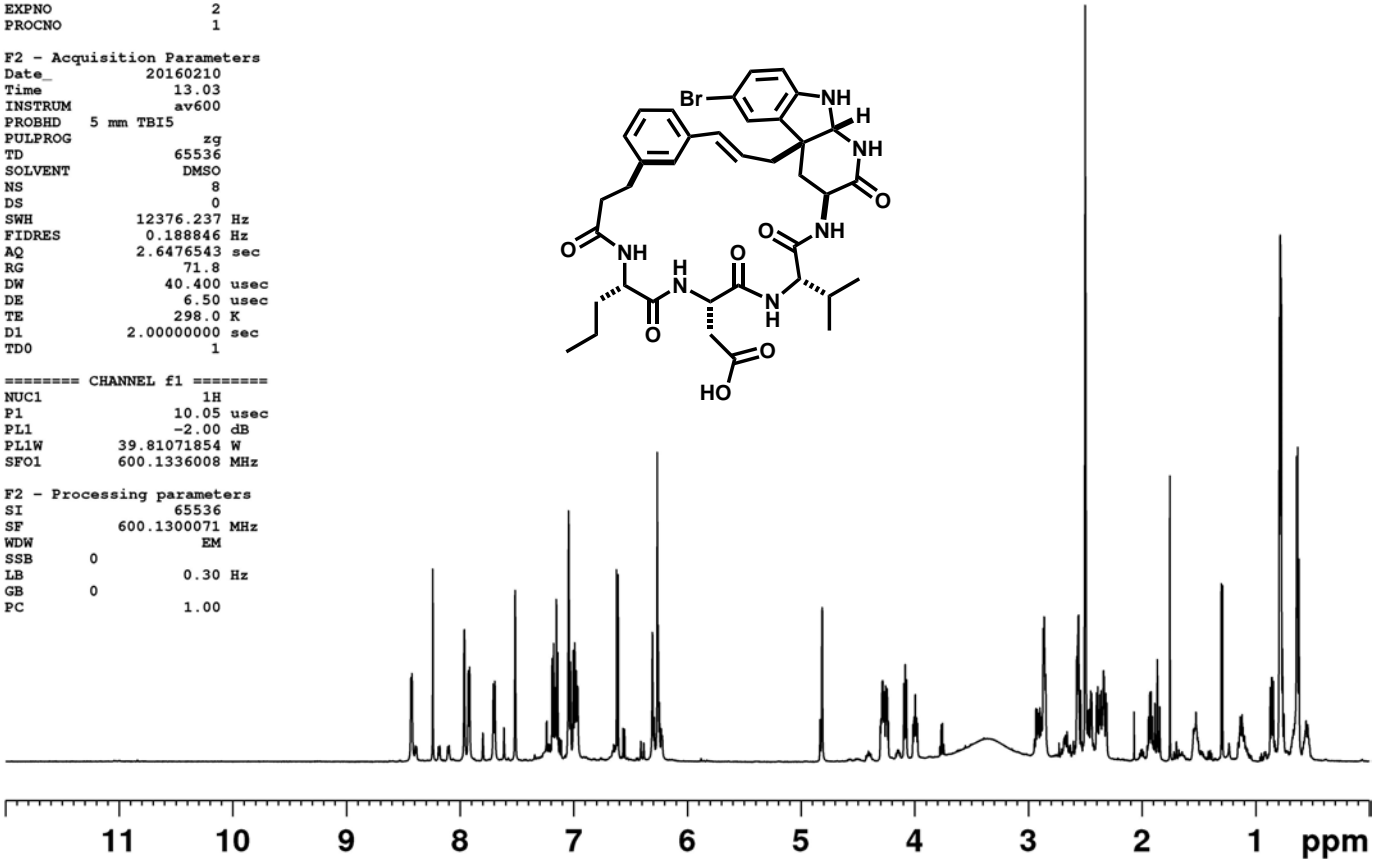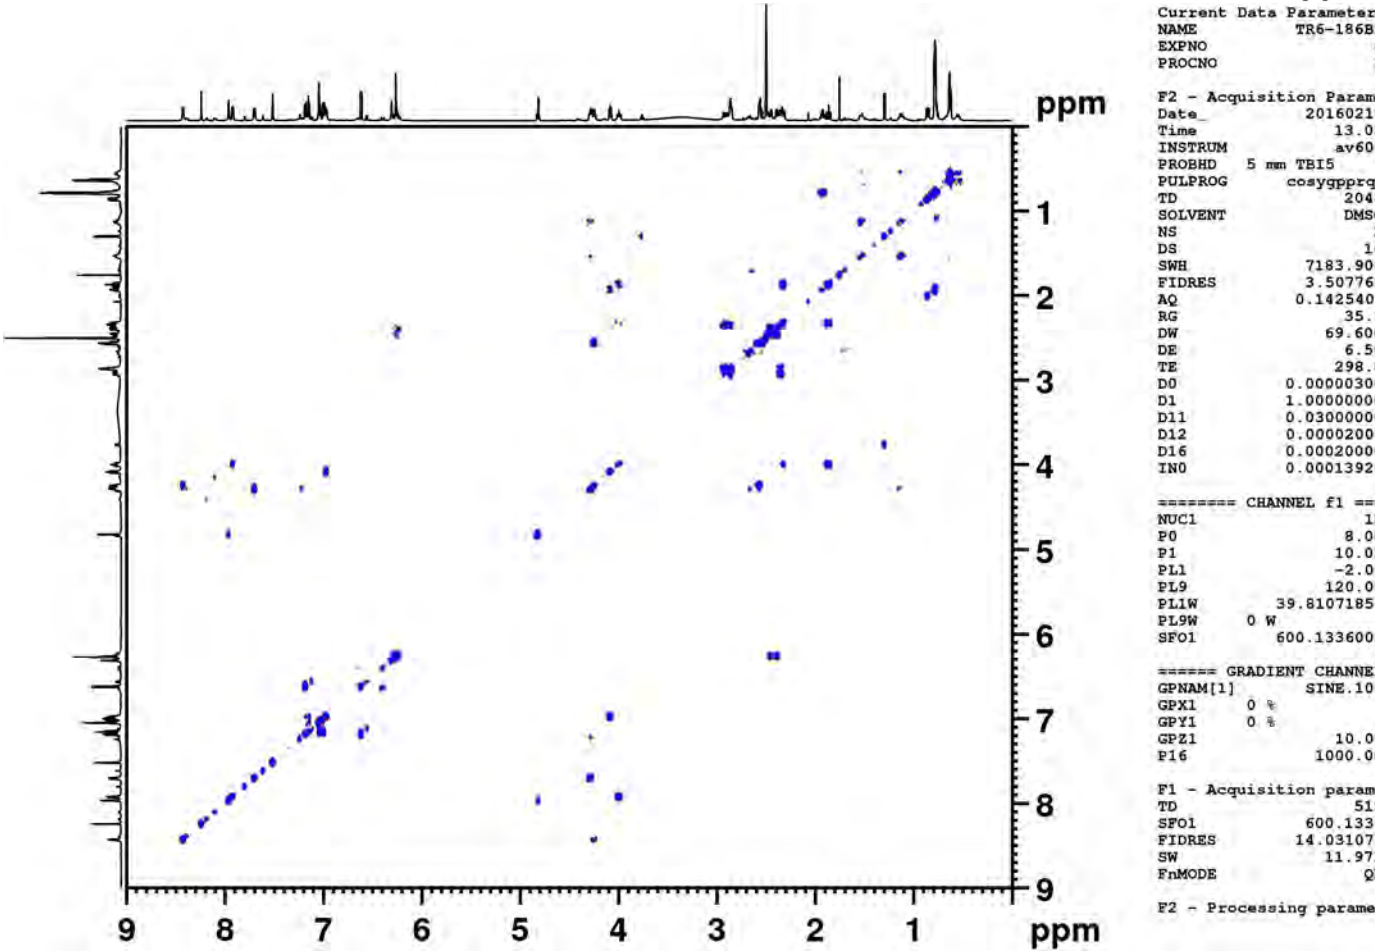

Current Data Parameters  
 NAME TR6-186B2  
 EXPNO 6  
 PROCNO 1

F2 - Acquisition Parameters  
 Date\_ 20160210  
 Time 13.05  
 INSTRUM av600  
 PROBHD 5 mm TBI5  
 PULPROG cosygprqf  
 TD 2048  
 SOLVENT DMSO  
 NS 2  
 DS 16  
 SWH 7183.908 Hz  
 FIDRES 3.507768 Hz  
 AQ 0.1425408 sec  
 RG 35.9  
 DW 69.600 usec  
 DE 6.50 usec  
 TE 298.0 K  
 D0 0.00000300 sec  
 D1 1.00000000 sec  
 D11 0.03000000 sec  
 D12 0.00002000 sec  
 D16 0.00020000 sec  
 IN0 0.00013920 sec

===== CHANNEL f1 =====  
 NUC1 1H  
 P0 8.00 usec  
 P1 10.05 usec  
 PL1 -2.00 dB  
 PL9 120.00 dB  
 PL1W 39.81071854 W  
 PL9W 0 W  
 SFO1 600.1336008 MHz

===== GRADIENT CHANNEL =====  
 GPNAM[1] SINE.100  
 GPX1 0 %  
 GPY1 0 %  
 GPZ1 10.00 %  
 P16 1000.00 usec

F1 - Acquisition parameters  
 TD 512  
 SFO1 600.1336 MHz  
 FIDRES 14.031077 Hz  
 SW 11.971 ppm  
 FnMODE QF

F2 - Processing parameters

```

Current Data Parameters
NAME      TR6-186B2
EXPNO    7
PROCNO   1

F2 - Acquisition Parameters
Date_    20160210
Time     13.26
INSTRUM  av600
PROBHD   5 mm TBI5
PULPROG  mlevsgpph
TD       2048
SOLVENT  DMSO
NS       2
DS       16
SWH      7788.162 Hz
FIDRES   3.802814 Hz
AQ       0.1314816 sec
RG       228.1
DW       64.200 usec
DE       6.50 usec
TE       298.0 K
D0       0.00003780 sec
D1       1.00000000 sec
D9       0.06000000 sec
D12      0.00002000 sec
D16      0.00020000 sec
IN0      0.00012840 sec
L1       24

```

```

===== CHANNEL f1 =====
NUC1     1H
P1       10.05 usec
P2       20.10 usec
P5       26.68 usec
P6       40.00 usec
P7       80.00 usec
P12      3000.00 usec
P17      2500.00 usec
PL0      120.00 dB
PL1      -2.00 dB
PL10     10.00 dB
PLOW     0 W
PL1W     39.81071854 W
PL10W    2.51188636 W
SFO1     600.1339008 MHz
SP1       120.00 dB
SPNAM[1] Squa100.1000
SFOAL1   1.000
SPOFFS1  -1456.44 Hz

===== GRADIENT CHANNEL =====
GPNAM[1] SINE.100
GPNAM[2] SINE.100

```

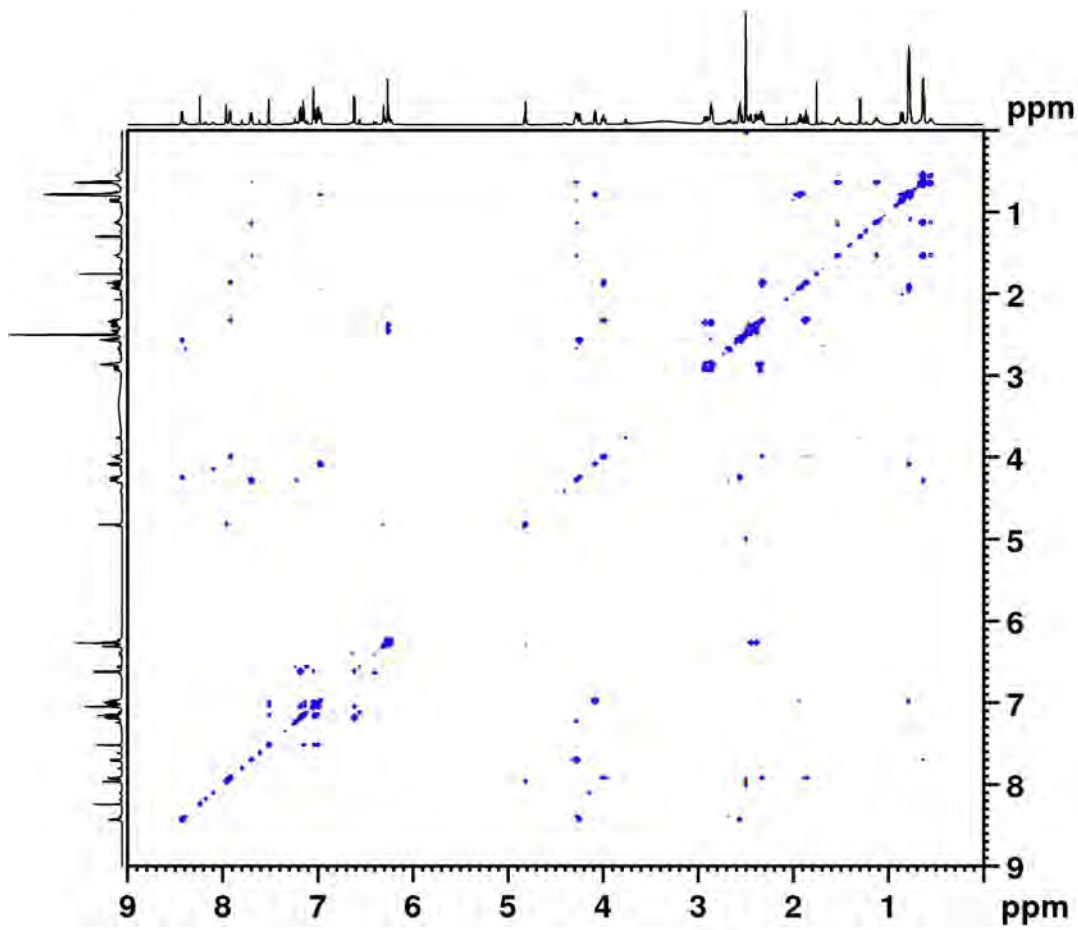

```

Current Data Parameters
NAME      TR6-186B2
EXPNO    8
PROCNO   1

F2 - Acquisition Parameters
Date_    20160210
Time     13.47
INSTRUM  av600
PROBHD   5 mm TBI5
PULPROG  hsqcetgpsisp
TD       2048
SOLVENT  DMSO
NS       6
DS       16
SWH      7788.162 Hz
FIDRES   3.802814 Hz
AQ       0.1314816 sec
RG       23170.5
DW       64.200 usec
DE       6.00 usec
TE       298.3 K
CNST2    145.0000000
D0       0.00000300 sec
D1       1.20000005 sec
D4       0.00172414 sec
D11      0.03000000 sec
D16      0.00020000 sec
D24      0.00086200 sec
IN0      0.00002070 sec
ZGQFTNS

```

```

===== CHANNEL f1 =====
NUC1     1H
P1       10.05 usec
P2       20.10 usec
P28      1000.00 usec
PL1      -2.00 dB
PL1W     39.81071854 W
SFO1     600.1339008 MHz

===== CHANNEL f2 =====
CPDPRG[2] garp
NUC2     13C
P3       19.50 usec
P4       39.00 usec
P14      1000.00 usec
ECPD2    65.00 usec
PL0      120.00 dB
PL2      -3.00 dB
PL12     7.46 dB
PLOW     0 W
PL2W     150.35617065 W
PL12W    13.52450085 W
SFO2     150.9133722 MHz

```

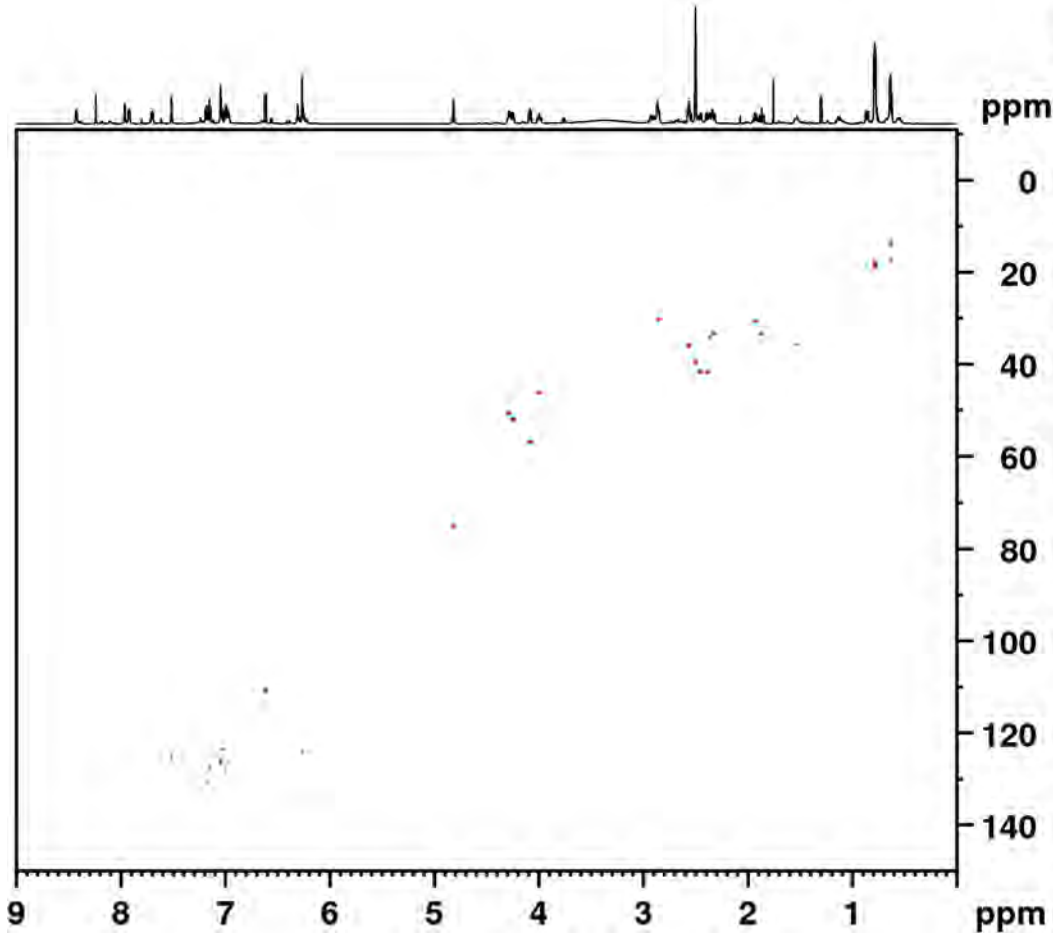

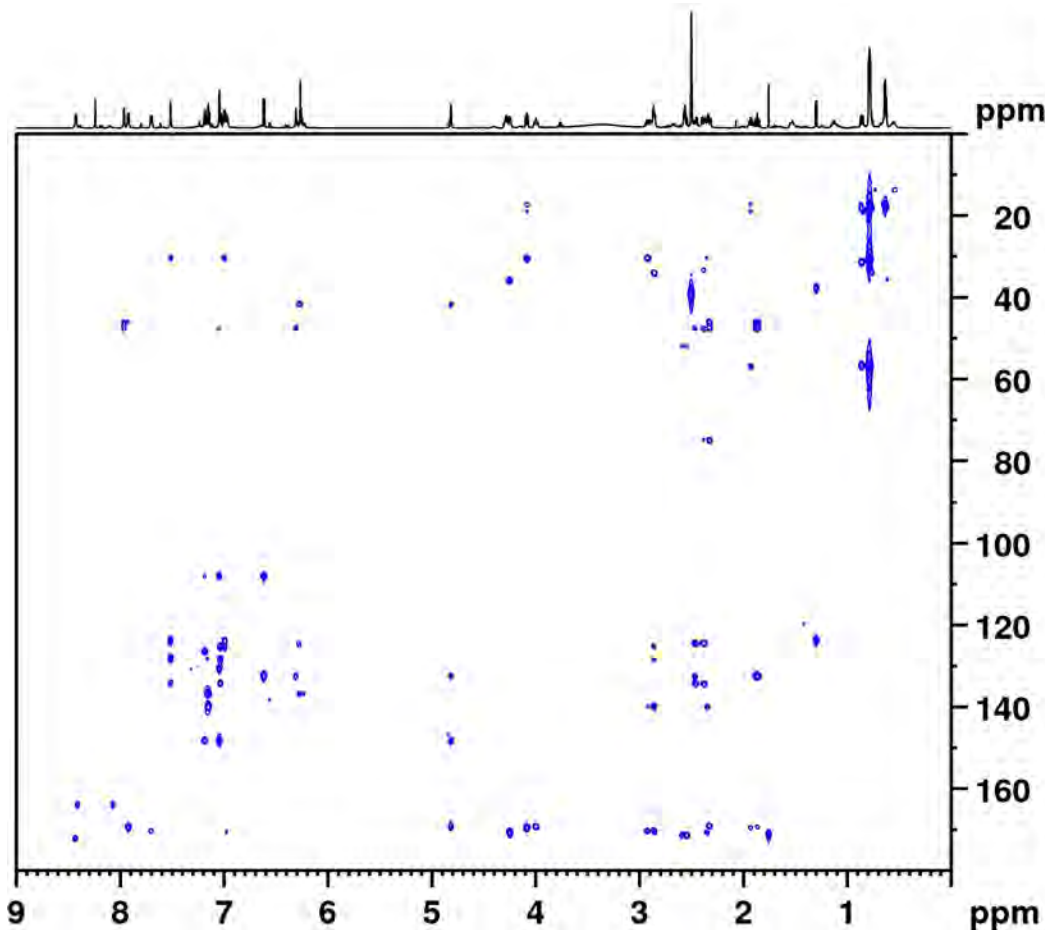

```

Current Data Parameters
NAME      TR6-186B2
EXPNO     9
PROCNO    1

F2 - Acquisition Parameters
Date_     20160210
Time      14.23
INSTRUM   av600
PROBHD    5 mm TBI5
PULPROG   hmbcgp1pndqf
TD         2048
SOLVENT   DMSO
NS         24
DS         16
SWH        7788.162 Hz
FIDRES     3.802814 Hz
AQ         0.1314816 sec
RG         26008
DW         64.200 usec
DE         6.00 usec
TE         297.5 K
CNST2     145.0000000
CNST13    7.0000000
D0         0.00000300 sec
D1         1.50000000 sec
D2         0.00344828 sec
D6         0.07142857 sec
D16        0.00020000 sec
IN0        0.00001745 sec

===== CHANNEL f1 =====
NUC1      1H
P1         10.57 usec
P2         21.14 usec
PL1        -2.00 dB
PL1W       39.81071854 W
SFO1       600.1339008 MHz

===== CHANNEL f2 =====
NUC2      13C
P3         19.50 usec
P2         -3.00 dB
PL2W       150.35617065 W
SFO2       150.9156357 MHz

===== GRADIENT CHANNEL =====
GPNAM[1]  SINE.100
GPNAM[2]  SINE.100
GPNAM[3]  SINE.100
GPX1      0 %
GPX2      0 %
GPX3      0 %
GPY1      0 %
GPY2      0 %

```

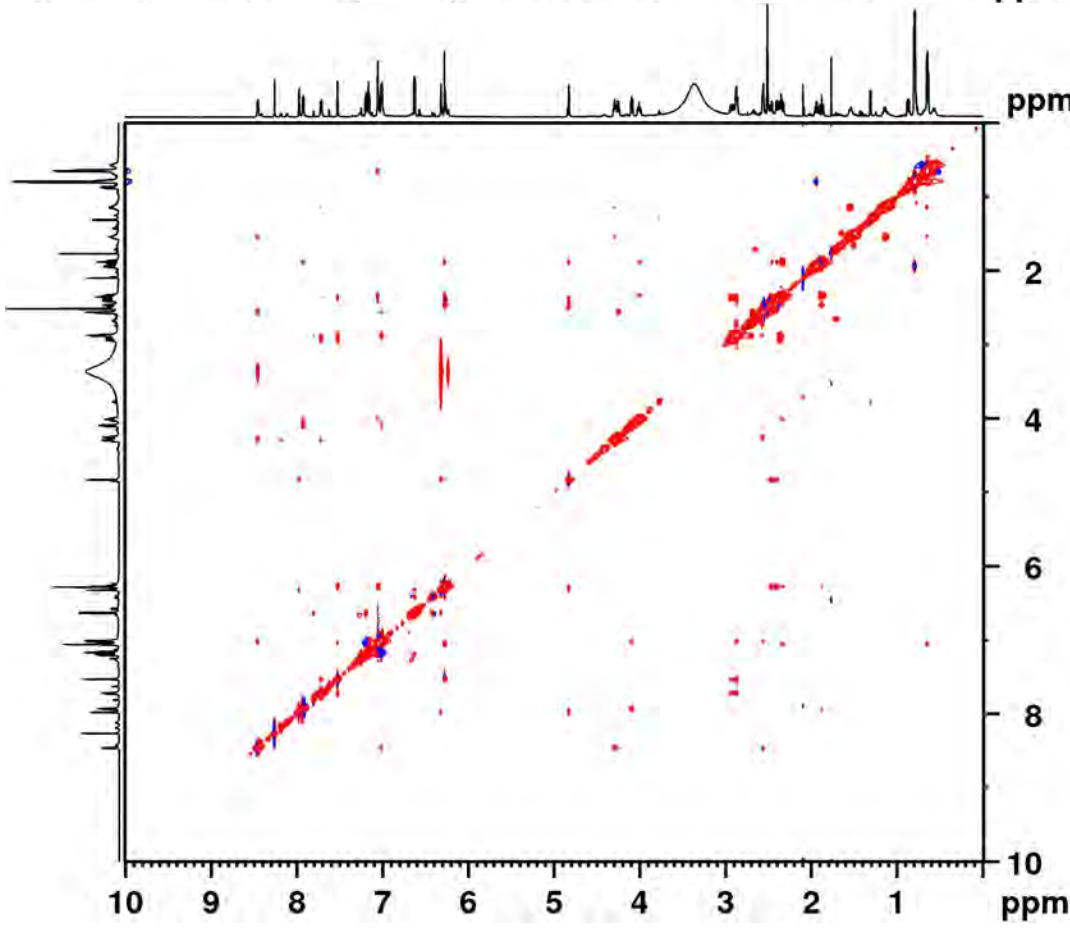

```

Current Data Parameters
NAME      TR6-186B2
EXPNO     13
PROCNO    1

F2 - Acquisition Parameters
Date_     20160211
Time      8.54
INSTRUM   av600
PROBHD    5 mm TBI5
PULPROG   noesyessgpph
TD         2048
SOLVENT   DMSO
NS         8
DS         16
SWH        6009.615 Hz
FIDRES     2.934382 Hz
AQ         0.1703936 sec
RG         512
DW         83.200 usec
DE         6.50 usec
TE         298.0 K
D0         0.00007010 sec
D1         1.50000000 sec
D8         0.30000001 sec
D11        0.03000000 sec
D12        0.00002000 sec
D16        0.00020000 sec
IN0        0.00016665 sec

===== CHANNEL f1 =====
NUC1      1H
P1         10.38 usec
P2         20.76 usec
P12        3000.00 usec
PL0         120.00 dB
PL1         -2.00 dB
PLOW       0 W
PL1W       39.81071854 W
SFO1       600.1330006 MHz
SP1         41.20 dB
SPNAM[1]   Squa100.1000
SPOAL1     1.000
SPOFFS1    -977.55 Hz

===== GRADIENT CHANNEL =====
GPNAM[1]  SINE.100
GPNAM[2]  SINE.100
GPX1      0 %
GPX2      0 %
GPY1      0 %
GPY2      0 %
GPZ1      31.00 %
GPZ2      11.00 %

```

Macrocyclic Product **S2b**

```

Current Data Parameters
NAME      TR6-186B1
EXPNO     2
PROCNO    1

F2 - Acquisition Parameters
Date_     20160210
Time      16.32
INSTRUM   av600
PROBHD    5 mm TBI5
PULPROG   zg
TD         65536
SOLVENT   DMSO
NS         8
DS         0
SWH        12376.237 Hz
FIDRES     0.188846 Hz
AQ         2.6476543 sec
RG         71.8
DW         40.400 usec
DE         6.50 usec
TE         298.0 K
D1         2.00000000 sec
TDO        1
    
```

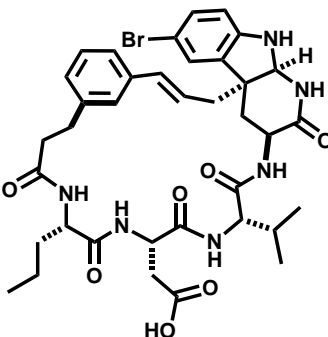

```

===== CHANNEL f1 =====
NUC1      1H
P1        10.32 usec
PL1       -2.00 dB
PL1W      39.81071854 W
SFO1      600.1336008 MHz

F2 - Processing parameters
SI         65536
SF         600.1300072 MHz
WDW        EM
SSB        0
LB         0.30 Hz
GB         0
PC         1.00
    
```

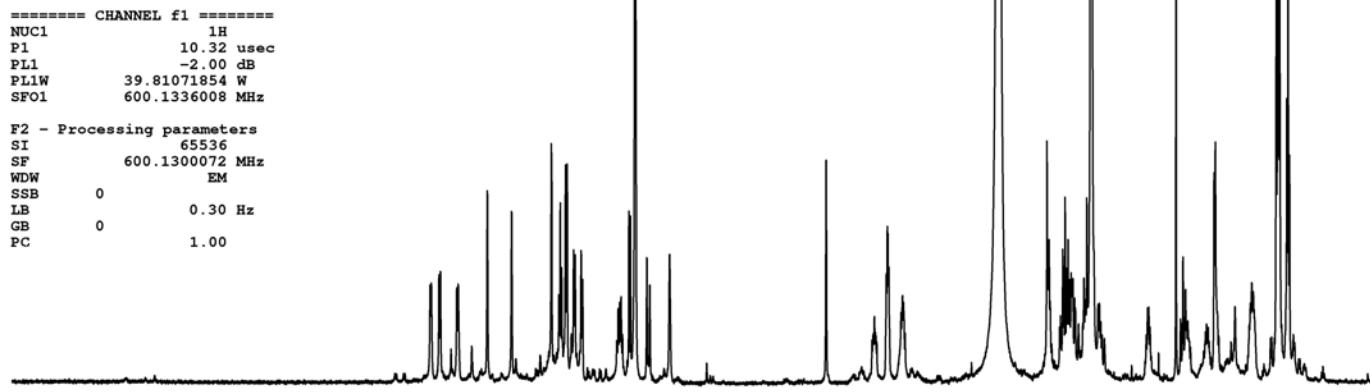

11 10 9 8 7 6 5 4 3 2 1 ppm

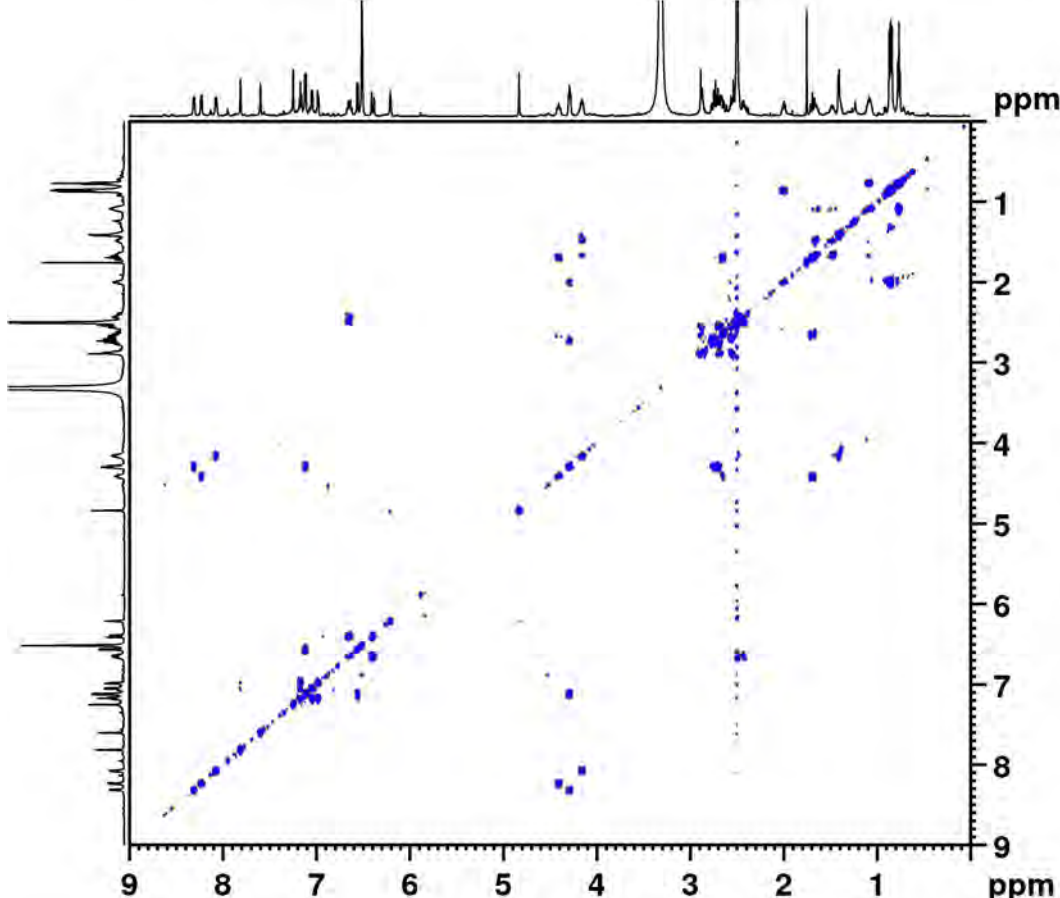

```

Current Data Parameters
NAME      TR6-186B1
EXPNO     6
PROCNO    1

F2 - Acquisition Parameters
Date_     20160210
Time      16.36
INSTRUM   av600
PROBHD    5 mm TBI5
PULPROG   cosygpprqf
TD         2048
SOLVENT   DMSO
NS         4
DS         16
SWH        7183.908 Hz
FIDRES     3.507768 Hz
AQ         0.1425408 sec
RG         2048
DW         69.600 usec
DE         6.50 usec
TE         298.0 K
D0         0.00000300 sec
D1         1.00000000 sec
D11        0.03000000 sec
D12        0.00002000 sec
D16        0.00020000 sec
IN0        0.00013920 sec
    
```

```

===== CHANNEL f1 =====
NUC1      1H
P0         8.00 usec
P1        10.32 usec
PL1       -2.00 dB
PL9        51.71 dB
PL1W      39.81071854 W
PL9W      0.00016943 W
SFO1      600.1319971 MHz
    
```

```

===== GRADIENT CHANNEL =====
GPNAM[1]  SINE.100
GFX1      0 %
GPY1      0 %
GPZ1      10.00 %
P16       1000.00 usec
    
```

```

F1 - Acquisition parameters
TD         161
SFO1       600.132 MHz
FIDRES     44.620449 Hz
SW         11.971 ppm
FnMODE     QF
    
```

```

F2 - Processing parameters
    
```



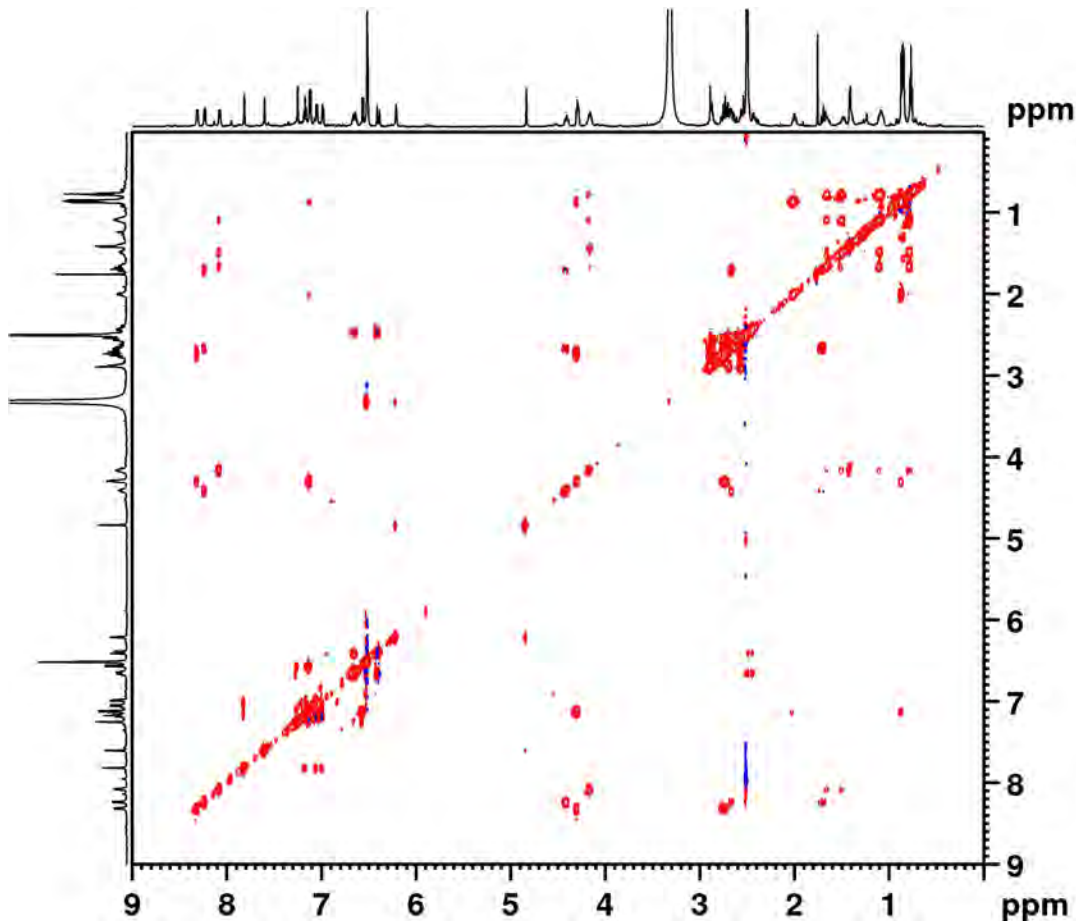

```

Current Data Parameters
NAME      TR6-186B1
EXPNO    7
PROCNO   1

F2 - Acquisition Parameters
Date_    20160210
Time     16.50
INSTRUM  av600
PROBHD   5 mm TBI5
PULPROG  mlevsgpph
TD       2048
SOLVENT  DMSO
NS       4
DS       16
SWH      7788.162 Hz
FIDRES   3.802814 Hz
AQ       0.1314816 sec
RG       2896.3
DW       64.200 usec
DE       6.50 usec
TE       298.0 K
D0       0.00003763 sec
D1       1.00000000 sec
D9       0.06000000 sec
D12      0.00002000 sec
D16      0.00020000 sec
IN0      0.00012840 sec
L1       24
  
```

```

===== CHANNEL f1 =====
NUC1      1H
P1        10.32 usec
P2        20.64 usec
P5        26.68 usec
P6        40.00 usec
P7        80.00 usec
P12       3000.00 usec
P17       2500.00 usec
PL0       120.00 dB
PL1       -2.00 dB
PL10      9.77 dB
PLOW      0 W
PL1W      39.81071854 W
PL10W     2.64849997 W
SFO1      600.1339008 MHz
SP1       41.24 dB
SPNAM[1]  Squa100.1000
SPOAL1    1.000
SPOFFS1   -1903.74 Hz

===== GRADIENT CHANNEL =====
GPNAM[1]  SINE.100
GPNAM[2]  SINE.100
  
```

```

Current Data Parameters
NAME      TR6-186B1
EXPNO    8
PROCNO   1
  
```

```

F2 - Acquisition Parameters
Date_    20160210
Time     17.02
INSTRUM  av600
PROBHD   5 mm TBI5
PULPROG  hsqcetgpsisp
TD       2048
SOLVENT  DMSO
NS       24
DS       16
SWH      7788.162 Hz
FIDRES   3.802814 Hz
AQ       0.1314816 sec
RG       23170.5
DW       64.200 usec
DE       6.00 usec
TE       298.4 K
CNST2    145.0000000
D0       0.00000300 sec
D1       1.20000005 sec
D4       0.00172414 sec
D11      0.03000000 sec
D16      0.00020000 sec
D24      0.00086200 sec
IN0      0.00002070 sec
ZGPTNS
  
```

```

===== CHANNEL f1 =====
NUC1      1H
P1        10.32 usec
P2        20.64 usec
P28       1000.00 usec
PL1       -2.00 dB
PL1W      39.81071854 W
SFO1      600.1339008 MHz
  
```

```

===== CHANNEL f2 =====
CPDPRG[2]  garp
NUC2      13C
P3        19.50 usec
P4        39.00 usec
P14       1000.00 usec
PCPD2     65.00 usec
PL0       120.00 dB
PL2       -3.00 dB
PL12      7.46 dB
PLOW      0 W
PL2W      150.35617065 W
PL12W     13.52450085 W
SFO2      150.9133722 MHz
  
```

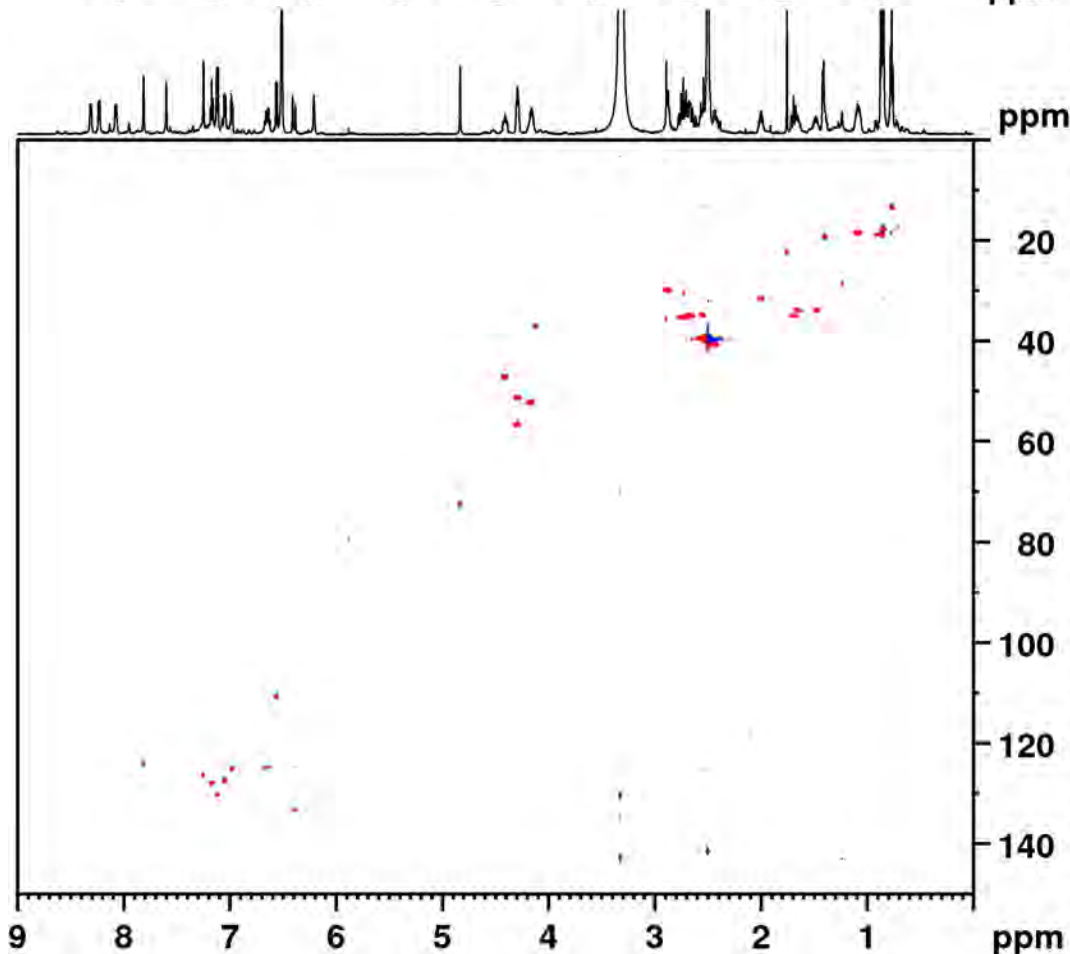

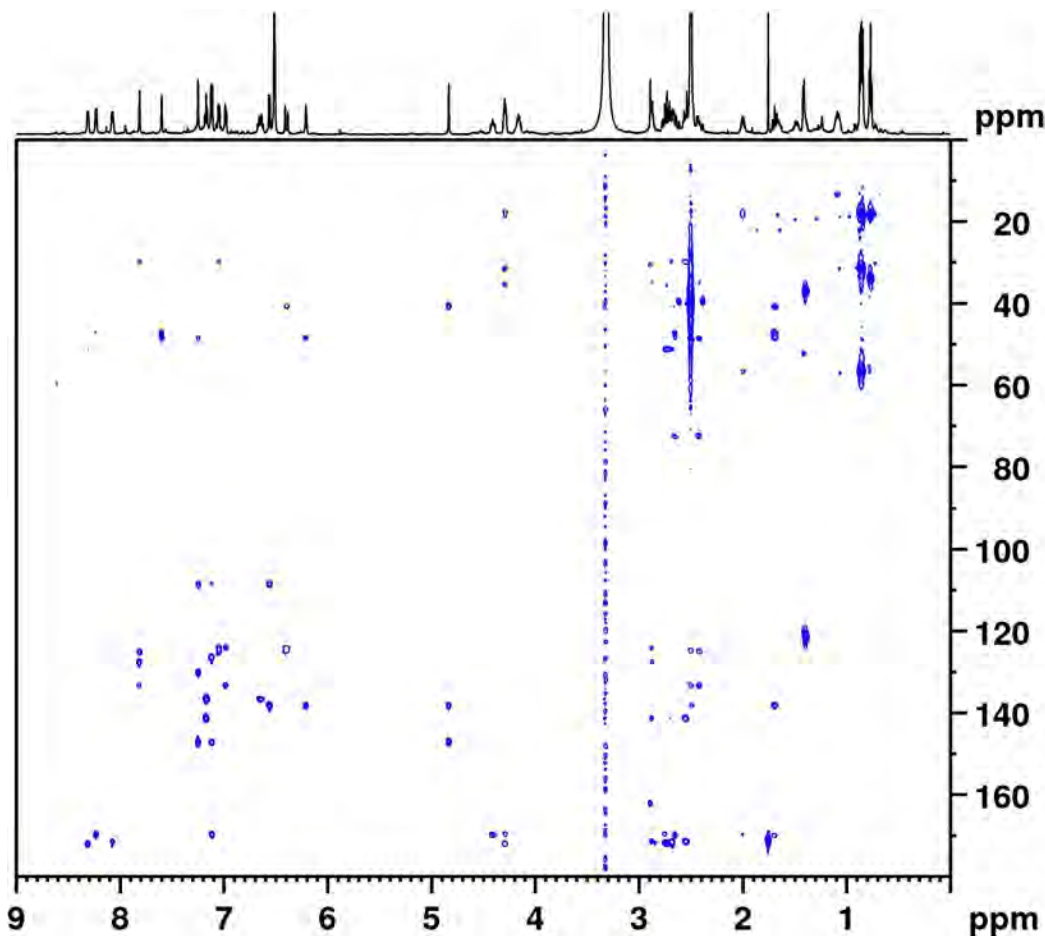

```

Current Data Parameters
NAME      TR6-186B1
EXPNO     9
PROCNO    1

F2 - Acquisition Parameters
Date_     20160210
Time      19.22
INSTRUM   av600
PROBHD    5 mm TBI5
PULPROG   hmbcggplpndqf
TD         2048
SOLVENT   DMSO
NS         60
DS         16
SWH        7788.162 Hz
FIDRES     3.802814 Hz
AQ         0.1314816 sec
RG         26008
DW         64.200 usec
DE         6.00 usec
TE         297.6 K
CNST2     145.0000000
CNST13    7.0000000
D0         0.00000300 sec
D1         1.50000000 sec
D2         0.00344828 sec
D6         0.07142857 sec
D16        0.00020000 sec
IN0        0.00001745 sec

===== CHANNEL f1 =====
NUC1       1H
P1         10.32 usec
P2         20.64 usec
PL1        -2.00 dB
PL1W       39.81071854 W
SFO1       600.1339008 MHz

===== CHANNEL f2 =====
NUC2       13C
P3         19.50 usec
P2         -3.00 dB
PL2W       150.35617065 W
SFO2       150.9156357 MHz

===== GRADIENT CHANNEL =====
GPNAM[1]   SINE.100
GPNAM[2]   SINE.100
GPNAM[3]   SINE.100
GPX1       0 %
GPX2       0 %
GPX3       0 %
GPY1       0 %
GPY2       0 %

```

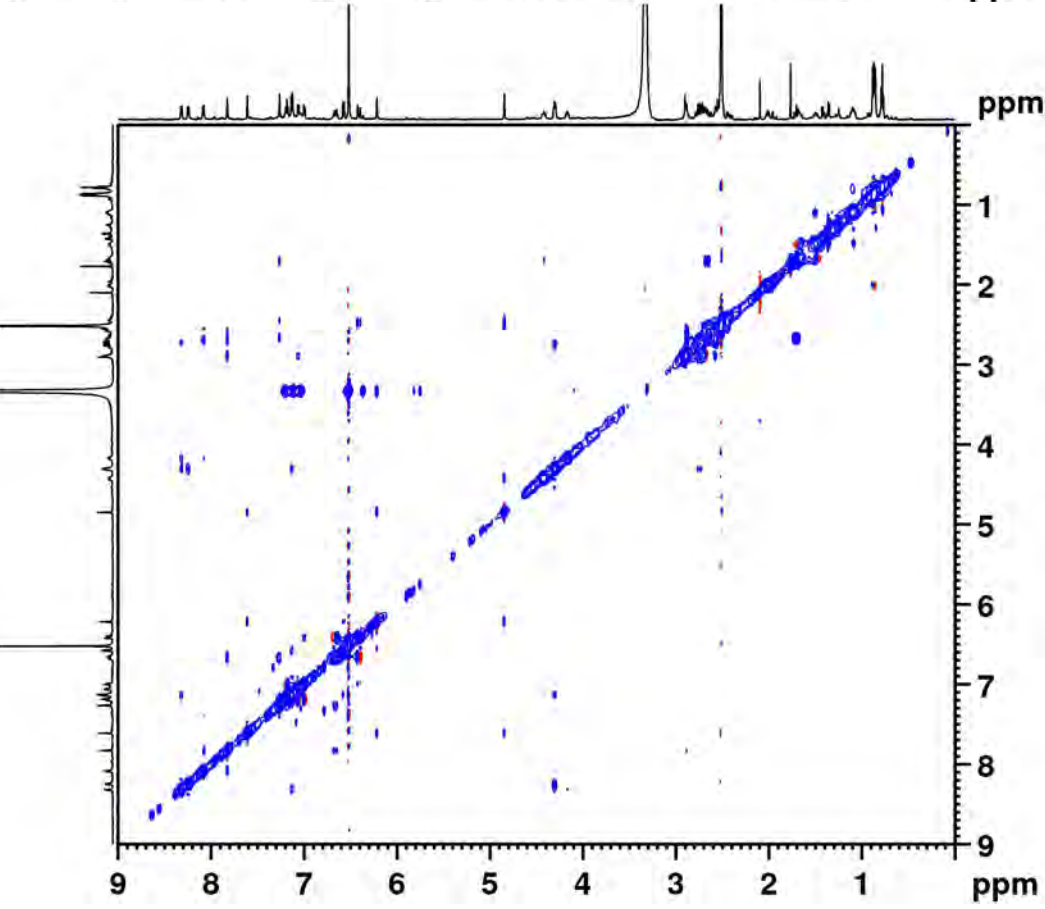

```

Current Data Parameters
NAME      TR6-186B1
EXPNO     14
PROCNO    1

F2 - Acquisition Parameters
Date_     20160211
Time      10.06
INSTRUM   av600
PROBHD    5 mm TBI5
PULPROG   noesyegpph
TD         2048
SOLVENT   DMSO
NS         16
DS         16
SWH        6009.615 Hz
FIDRES     2.934382 Hz
AQ         0.1703936 sec
RG         7298.2
DW         83.200 usec
DE         6.50 usec
TE         298.0 K
D0         0.00007010 sec
D1         1.50000000 sec
D8         0.30000001 sec
D11        0.03000000 sec
D12        0.00002000 sec
D16        0.00020000 sec
IN0        0.00016665 sec

===== CHANNEL f1 =====
NUC1       1H
P1         10.38 usec
P2         20.76 usec
P12        3000.00 usec
P10        120.00 dB
P11        -2.00 dB
P10W       0 W
P11W       39.81071854 W
SFO1       600.1330006 MHz
SP1         41.20 dB
SPNAM[1]   Squa100.1000
SPOAL1     1.000
SPOFFS1    -1003.15 Hz

===== GRADIENT CHANNEL =====
GPNAM[1]   SINE.100
GPNAM[2]   SINE.100
GPX1       0 %
GPX2       0 %
GPY1       0 %
GPY2       0 %
GPZ1       31.00 %
GPZ2       11.00 %

```

Macrocyclic product S2c

Current Data Parameters

NAME TR6-186C1  
EXPNO 2  
PROCNO 1

F2 - Acquisition Parameters

Date\_ 20160206  
Time 20.09  
INSTRUM av600  
PROBHD 5 mm TBI5  
PULPROG zg  
TD 65536  
SOLVENT DMSO  
NS 8  
DS 0  
SWH 12376.237 Hz  
FIDRES 0.188846 Hz  
AQ 2.6476543 sec  
RG 35.9  
DW 40.400 usec  
DE 6.50 usec  
TE 298.0 K  
D1 2.0000000 sec  
TD0 1

==== CHANNEL f1 =====  
NUC1 1H  
P1 10.57 usec  
PL1 -2.00 dB  
PL1W 39.81071854 W  
SFO1 600.1336008 MHz

F2 - Processing parameters  
SI 65536  
SF 600.1300072 MHz  
WDW EM  
SSB 0  
LB 0.30 Hz  
GB 0  
PC 1.00

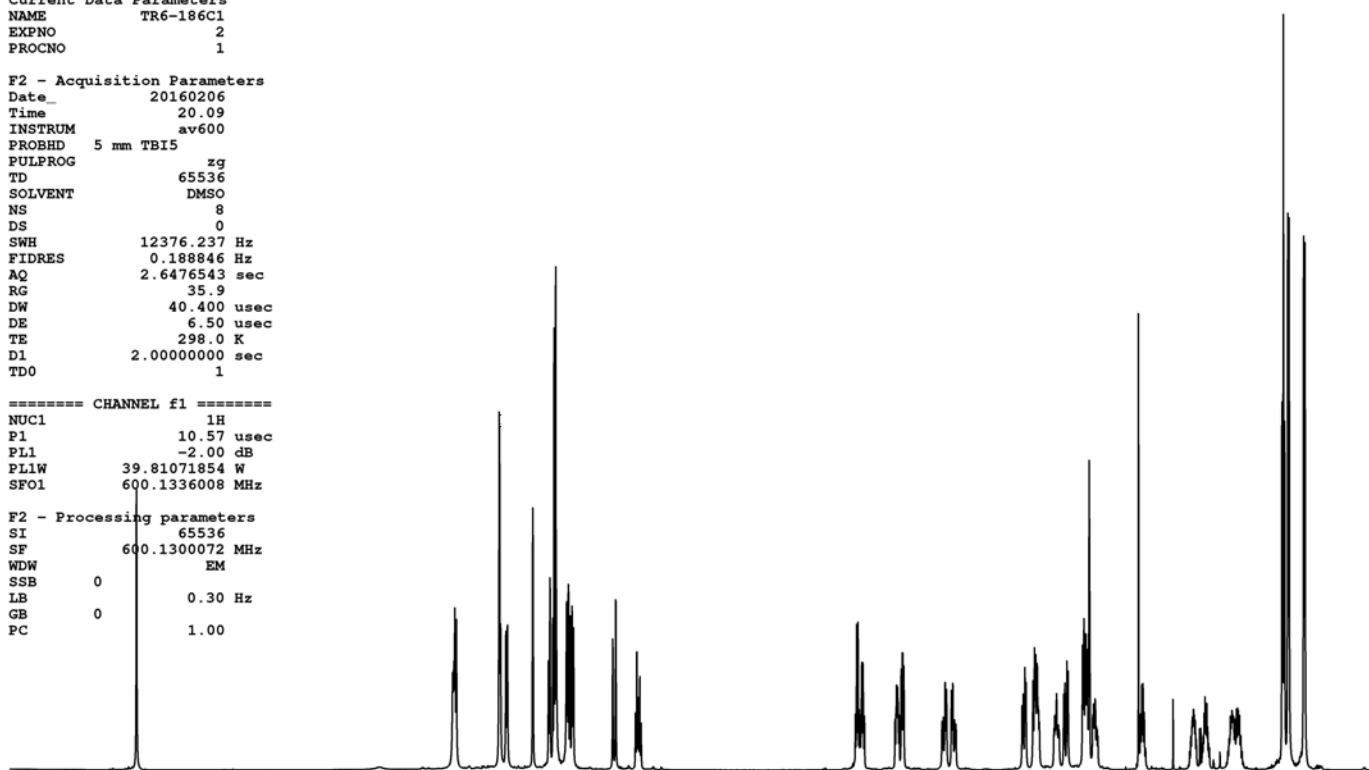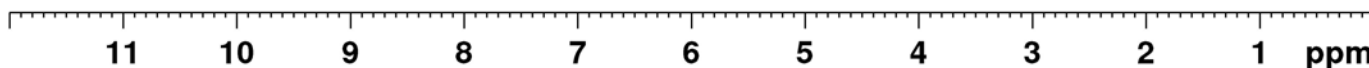

Current Data Parameters  
NAME TR6-186C1  
EXPNO 6  
PROCNO 1

F2 - Acquisition Parameters

Date\_ 20160206  
Time 20.11  
INSTRUM av600  
PROBHD 5 mm TBI5  
PULPROG cosygprqf  
TD 2048  
SOLVENT DMSO  
NS 2  
DS 16  
SWH 7183.908 Hz  
FIDRES 3.507768 Hz  
AQ 0.1425408 sec  
RG 35.9  
DW 69.600 usec  
DE 6.50 usec  
TE 298.0 K  
D0 0.0000300 sec  
D1 1.0000000 sec  
D11 0.0300000 sec  
D12 0.0000200 sec  
D16 0.0002000 sec  
INO 0.00013920 sec

==== CHANNEL f1 =====  
NUC1 1H  
P0 8.00 usec  
P1 10.57 usec  
PL1 -2.00 dB  
PL9 120.00 dB  
PL1W 39.81071854 W  
PL9W 0 W  
SFO1 600.1336008 MHz

===== GRADIENT CHANNEL =====  
GPNAM[1] SINE.100  
GPX1 0 %  
GPY1 0 %  
GPZ1 10.00 %  
P16 1000.00 usec

F1 - Acquisition parameters  
TD 512  
SFO1 600.1336 MHz  
FIDRES 14.031077 Hz  
SW 11.971 ppm  
FnMODE QF

F2 - Processing parameters

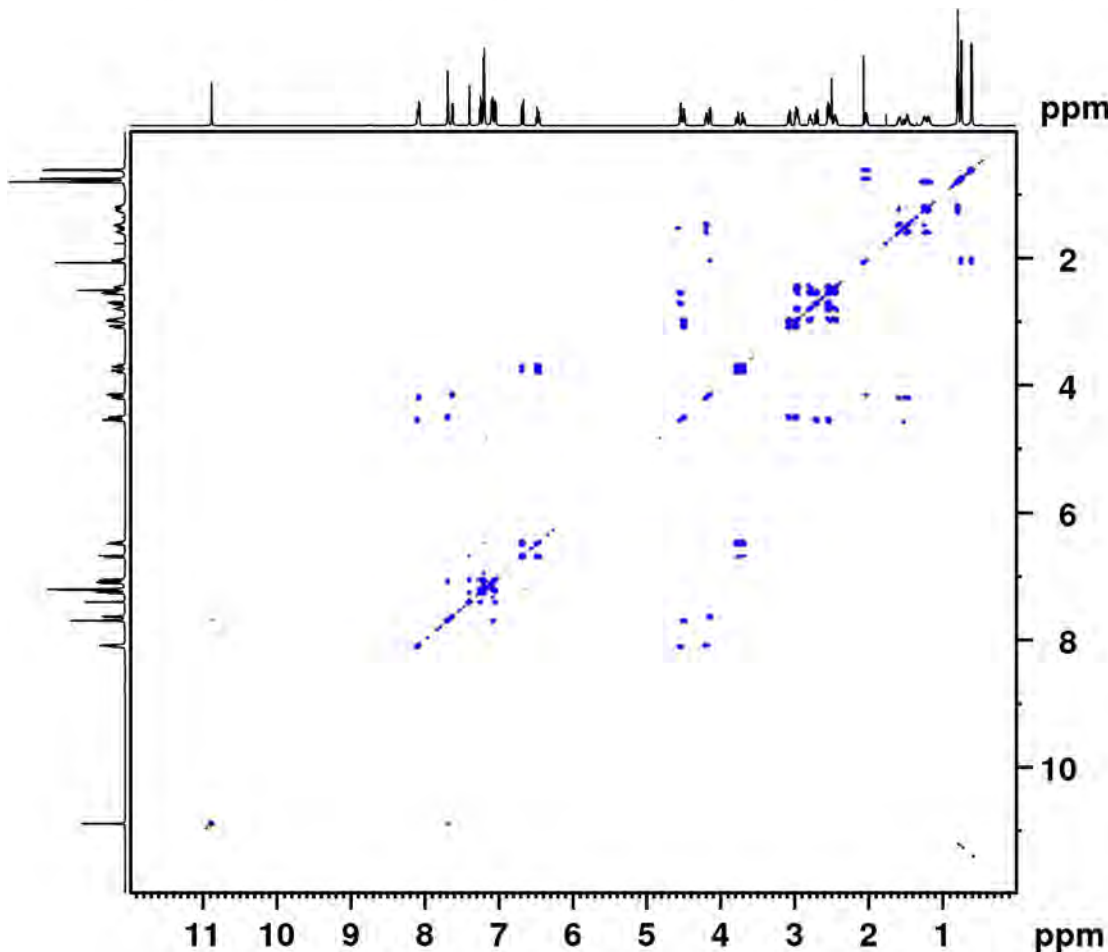

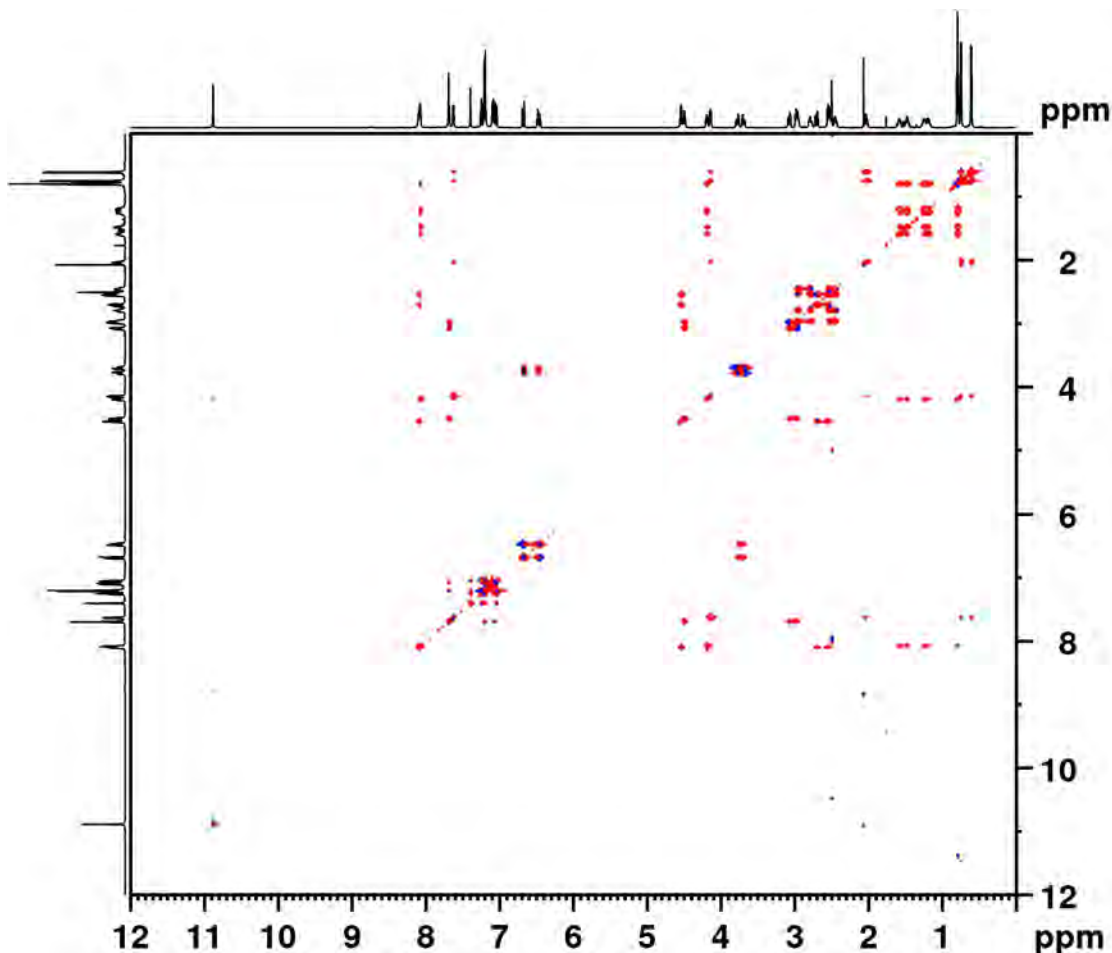

```

Current Data Parameters
NAME      TR6-186C1
EXPNO     7
PROCNO    1

F2 - Acquisition Parameters
Date_     20160206
Time      20.32
INSTRUM   av600
PROBHD    5 mm TB15
PULPROG   mlevsgpph
TD         2048
SOLVENT   DMSO
NS         2
DS         16
SWH        7788.162 Hz
FIDRES     3.802814 Hz
AQ         0.1314816 sec
RG         228.1
DW         64.200 usec
DE         6.50 usec
TE         298.0 K
D0         0.00003747 sec
D1         1.00000000 sec
D9         0.06000000 sec
D12        0.00002000 sec
D16        0.00020000 sec
IN0        0.00012840 sec
L1         24

===== CHANNEL f1 =====
NUC1       1H
P1         10.57 usec
P2         21.14 usec
P5         26.68 usec
P6         40.00 usec
P7         80.00 usec
P12        3000.00 usec
P17        2500.00 usec
PL0        120.00 dB
PL1        -2.00 dB
PL10       9.56 dB
PL1W       0 W
PL1W       39.81071854 W
PL10W      2.77971292 W
SFO1       600.1339008 MHz
SP1        120.00 dB
SPNAM[1]   Squal100.1000
SPOAL1     1.000
SPOFFS1    -1456.44 Hz

===== GRADIENT CHANNEL =====
GPNAM[1]   SINE.100
GPNAM[2]   SINE.100

```

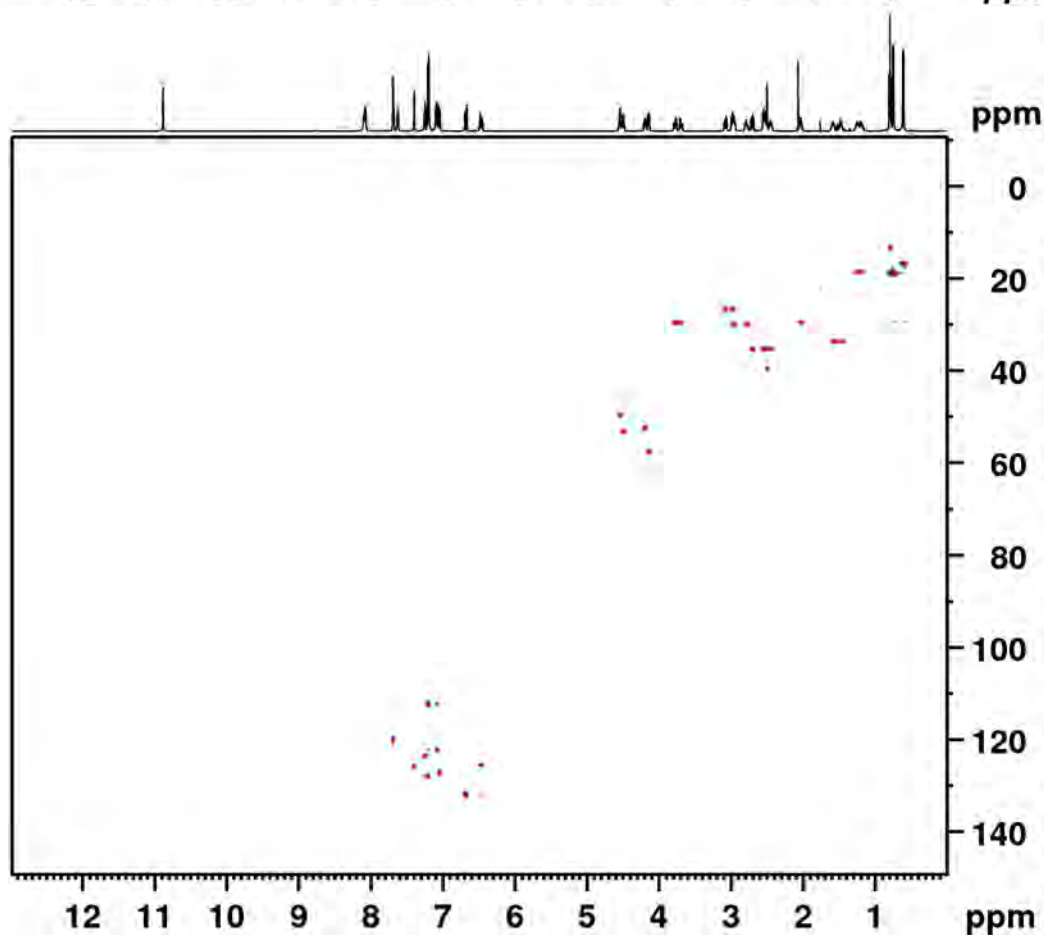

```

Current Data Parameters
NAME      TR6-186C1
EXPNO     8
PROCNO    1

F2 - Acquisition Parameters
Date_     20160206
Time      20.54
INSTRUM   av600
PROBHD    5 mm TB15
PULPROG   hsqcetgpsisp
TD         2048
SOLVENT   DMSO
NS         4
DS         16
SWH        7788.162 Hz
FIDRES     3.802814 Hz
AQ         0.1314816 sec
RG         23170.5
DW         64.200 usec
DE         6.00 usec
TE         298.3 K
CNST2     145.0000000
D0         0.00000300 sec
D1         1.20000005 sec
D4         0.00172414 sec
D11        0.03000000 sec
D16        0.00020000 sec
D24        0.00086200 sec
IN0        0.00002070 sec
ZGPTNS

===== CHANNEL f1 =====
NUC1       1H
P1         10.57 usec
P2         21.14 usec
P28        1000.00 usec
PL1        -2.00 dB
PL1W       39.81071854 W
SFO1       600.1339008 MHz

===== CHANNEL f2 =====
CPDPRG[2]  garp
NUC2       13C
P3         19.50 usec
P4         39.00 usec
P14        1000.00 usec
PCPD2     65.00 usec
PL0        120.00 dB
PL2        -3.00 dB
PL12       7.46 dB
PL1W       0 W
PL2W       150.35617065 W
PL12W      13.52450085 W
SFO2       150.9133722 MHz

```

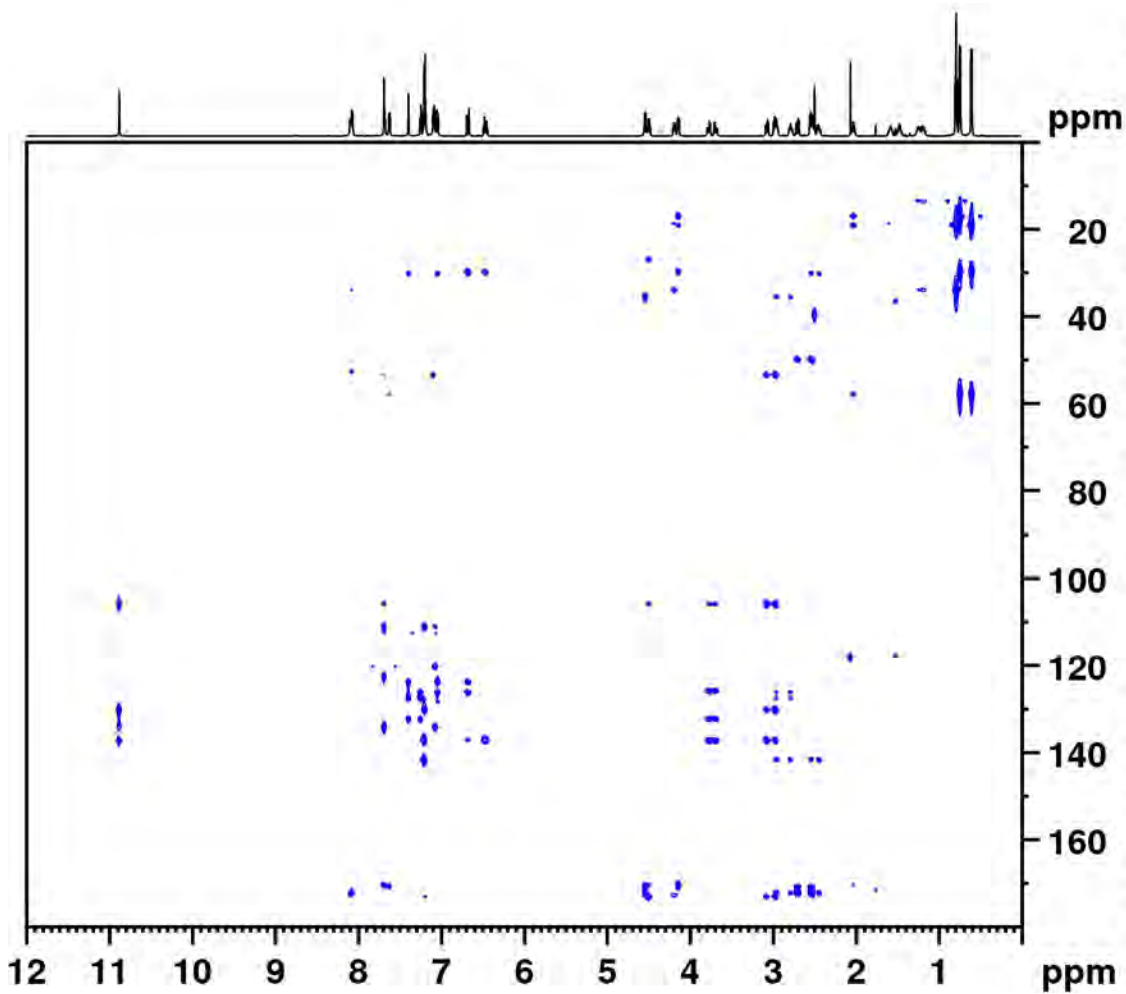

```

Current Data Parameters
NAME      TR6-186C1
EXPNO     9
PROCNO    1

F2 - Acquisition Parameters
Date_     20160206
Time      21.18
INSTRUM   av600
PROBHD    5 mm TBI5
PULPROG   hmbcggplndqf
TD         2048
SOLVENT   DMSO
NS         18
DS         16
SWH        7788.162 Hz
FIDRES     3.802814 Hz
AQ         0.1314816 sec
RG         26008
DW         64.200 usec
DE         6.00 usec
TE         297.5 K
CNST2     145.0000000
CNST13    7.0000000
DO         0.00000300 sec
D1         1.50000000 sec
D2         0.00344828 sec
D6         0.07142857 sec
D16        0.00020000 sec
IN0        0.00001745 sec

===== CHANNEL f1 =====
NUC1       1H
P1         10.57 usec
P2         21.14 usec
PL1        -2.00 dB
PL1W       39.81071854 W
SFO1       600.1339008 MHz

===== CHANNEL f2 =====
NUC2       13C
P3         19.50 usec
P2         -3.00 dB
PL2W       150.35617065 W
SFO2       150.9156357 MHz

===== GRADIENT CHANNEL =====
GPNAM[1]   SINE.100
GPNAM[2]   SINE.100
GPNAM[3]   SINE.100
GPX1       0 %
GPX2       0 %
GPX3       0 %
GPY1       0 %
GPY2       0 %

```

# Macrocyclic Product **S2d**

Current Data Parameters  
NAME TR6-186D1  
EXPNO 2  
PROCNO 1

F2 - Acquisition Parameters  
Date\_ 20160206  
Time 20.31  
INSTRUM av500  
PROBHD 5 mm DCH 13C-1  
PULPROG zg  
TD 65536  
SOLVENT DMSO  
NS 8  
DS 0  
SWH 10000.000 Hz  
FIDRES 0.152588 Hz  
AQ 3.2767999 sec  
RG 7.89  
DW 50.000 usec  
DE 10.00 usec  
TE 298.0 K  
D1 2.0000000 sec  
TD0 1

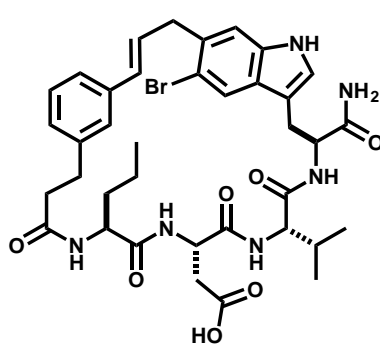

===== CHANNEL f1 =====  
SF01 500.1330008 MHz  
NUC1 1H  
P1 9.90 usec  
PLW1 13.5000000 W

F2 - Processing parameters  
SI 65536  
SF 500.1300041 MHz  
WDW EM  
SSB 0  
LB 0.30 Hz  
GB 0  
PC 1.00

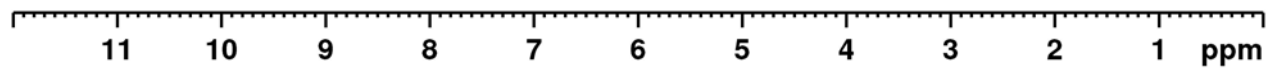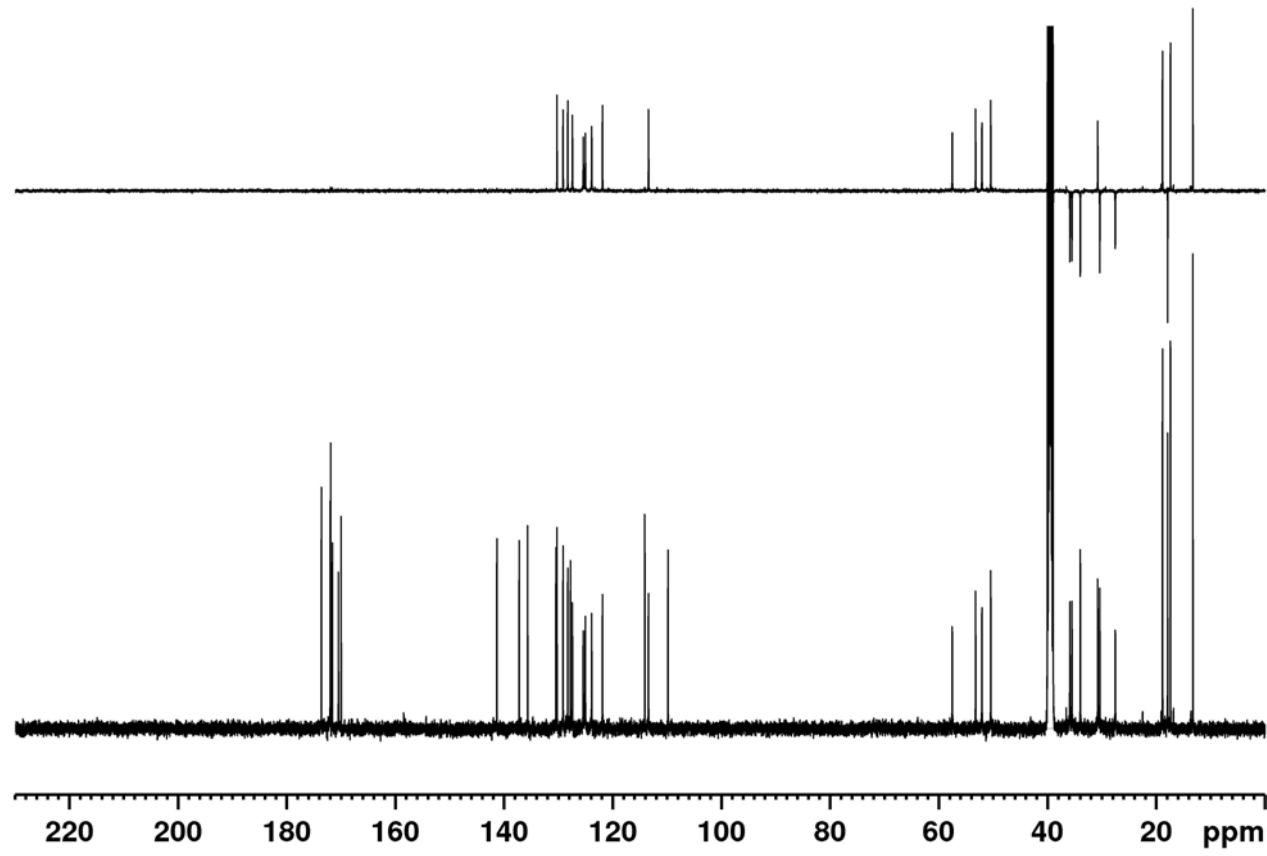

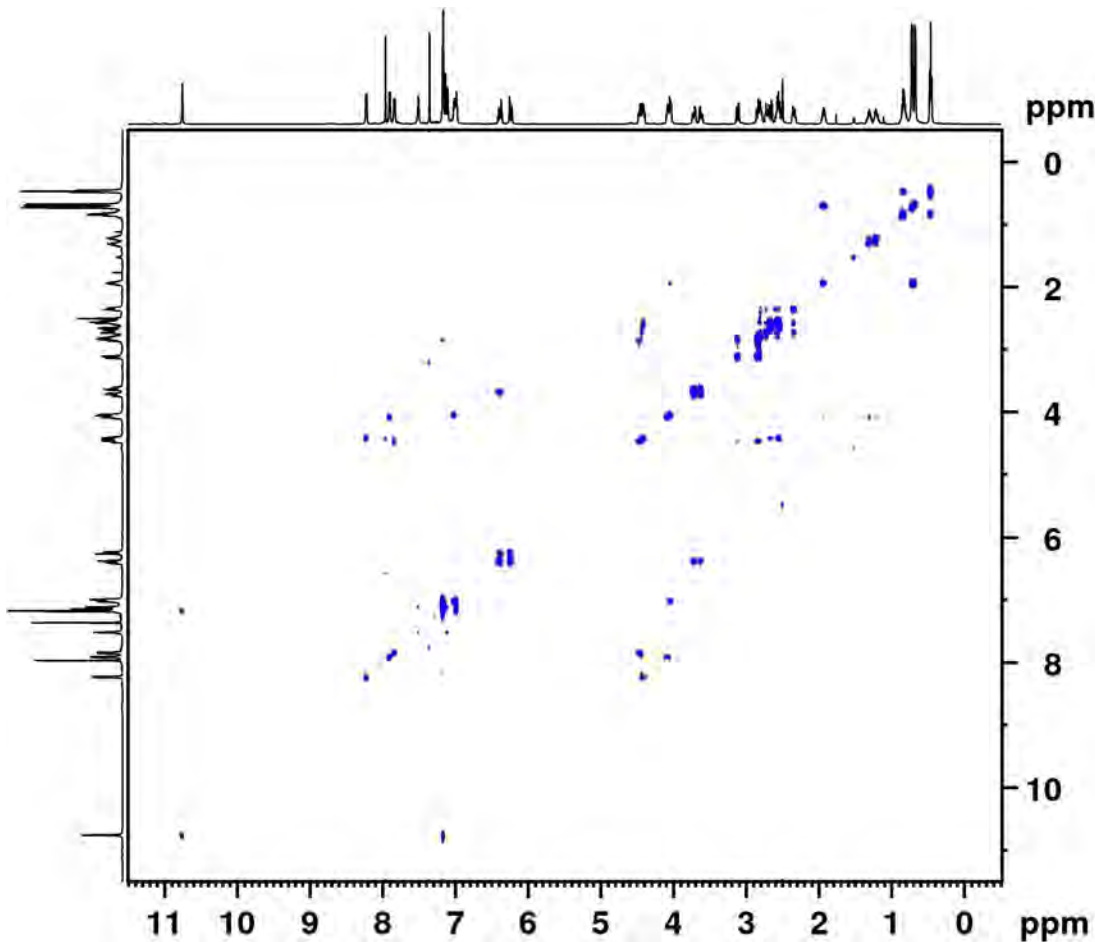

```

Current Data Parameters
NAME      TR6-186D1
EXPNO     5
PROCNO    1

F2 - Acquisition Parameters
Date_     20160206
Time      20.37
INSTRUM   av500
PROBHD    5 mm DCH 13C-1
PULPROG   cosygpmfph
TD         2048
SOLVENT   DMSO
NS         2
DS         8
SWH        6009.615 Hz
FIDRES     2.934382 Hz
AQ         0.1703936 sec
RG         7.89
DW         83.200 usec
DE         10.00 usec
TE         298.0 K
D0         0.00007059 sec
D1         1.20000005 sec
D13        0.00000400 sec
D16        0.00020000 sec
IN0        0.00016640 sec

===== CHANNEL f1 =====
SF01      500.1327507 MHz
NUC1       1H
P1         9.90 usec
P2         19.80 usec
PLW1      13.50000000 W

===== GRADIENT CHANNEL =====
GPNAM[1]   SMSQ10.100
GPNAM[2]   SMSQ10.100
GPZ1       10.00 %
GPZ2       20.00 %
P16        1000.00 usec

F1 - Acquisition parameters
TD          512
SF01        500.1328 MHz
FIDRES      11.737530 Hz
SW          12.016 ppm
FnMODE      Stases-TPPI

F2 - Processing parameters
SI           4096
SF           500.1300028 MHz
WDW          QSINE
SSB          1
  
```

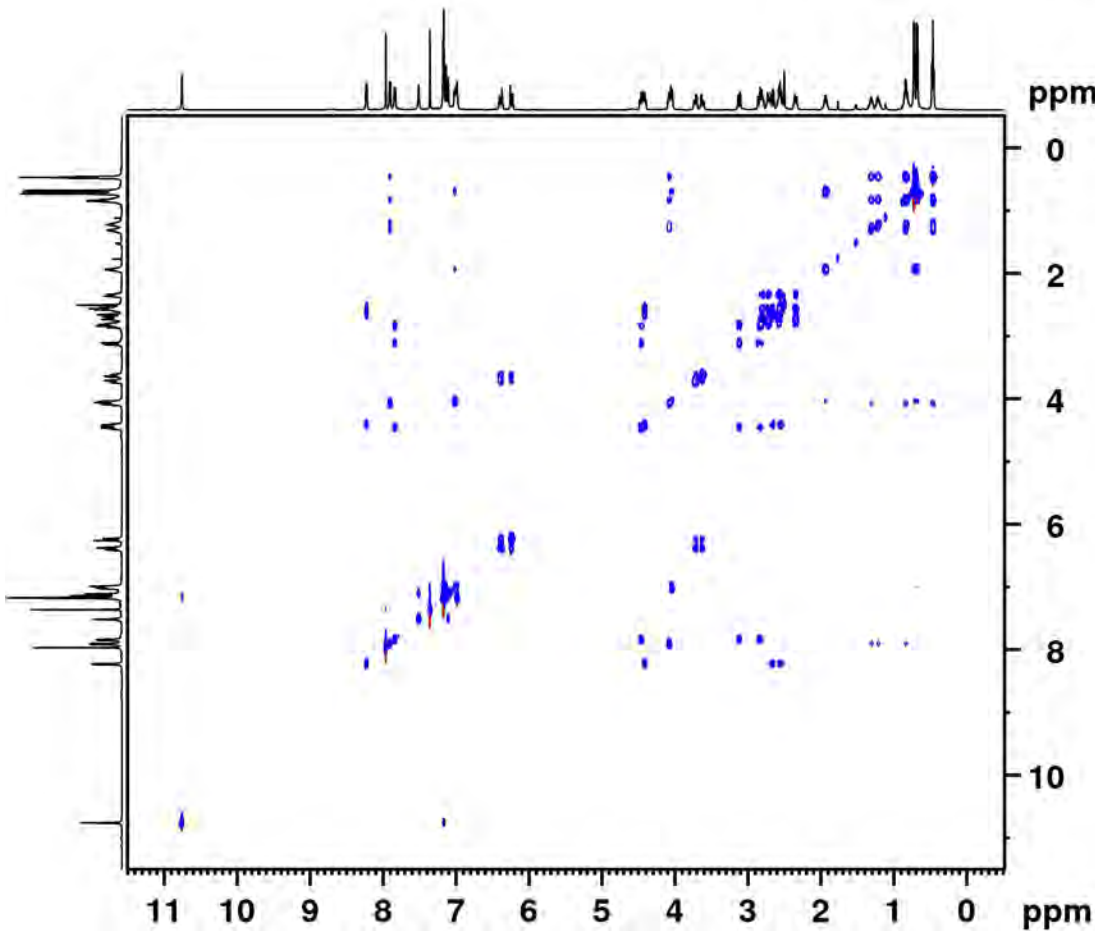

```

Current Data Parameters
NAME      TR6-186D1
EXPNO     6
PROCNO    1

F2 - Acquisition Parameters
Date_     20160206
Time      21.01
INSTRUM   av500
PROBHD    5 mm DCH 13C-1
PULPROG   mlevetpp.js
TD         2048
SOLVENT   DMSO
NS         2
DS         16
SWH        6009.615 Hz
FIDRES     2.934382 Hz
AQ         0.1703936 sec
RG         59.34
DW         83.200 usec
DE         10.00 usec
TE         298.0 K
D0         0.00000300 sec
D1         1.50000000 sec
D9         0.06000000 sec
D11        0.03000000 sec
D12        0.00002000 sec
D16        0.00020000 sec
IN0        0.00016640 sec
L1         24

===== CHANNEL f1 =====
SF01      500.1327507 MHz
NUC1       1H
P1         9.90 usec
P2         19.80 usec
P5         26.68 usec
P6         40.00 usec
P7         80.00 usec
P17        2500.00 usec
PLW1      13.50000000 W
PLW10     0.92682981 W

===== GRADIENT CHANNEL =====
GPNAM[1]   SINE.100
GPNAM[2]   SINE.100
GPZ1       30.00 %
GPZ2       30.00 %
P16        1000.00 usec

F1 - Acquisition parameters
TD          256
SF01        500.1328 MHz
FIDRES      23.475060 Hz
  
```

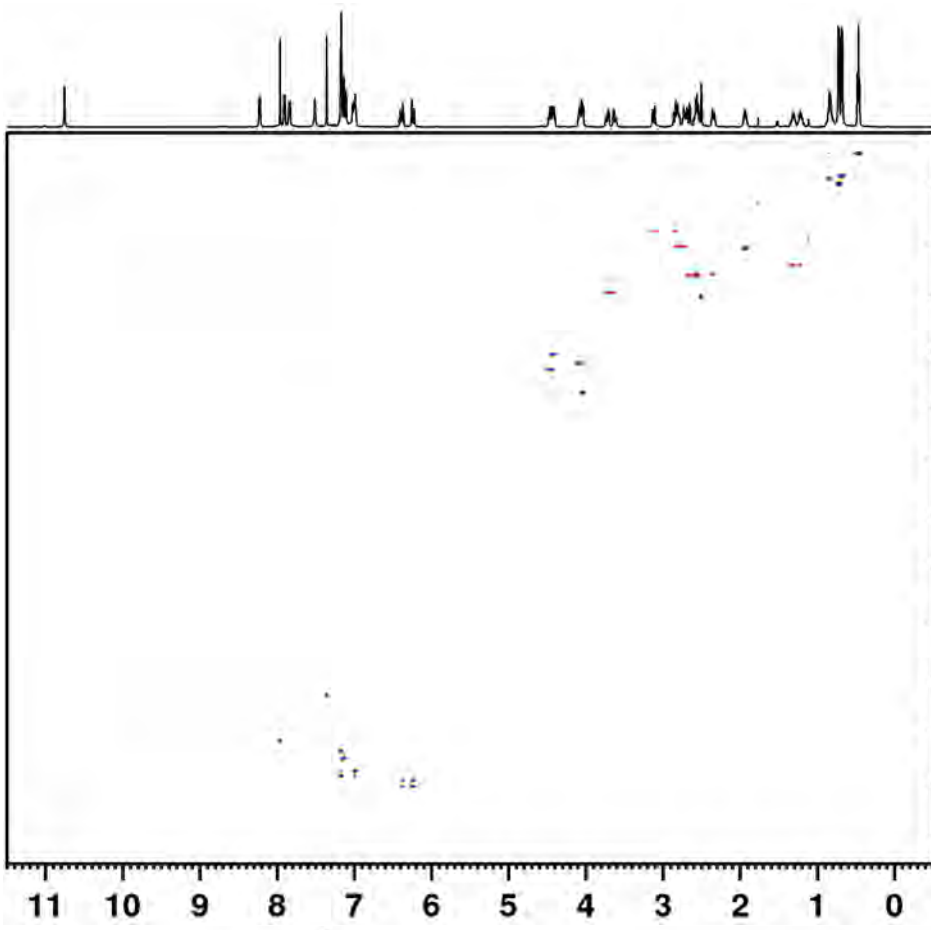

Current Data Parameters  
 NAME TR6-186D1  
 EXPNO 7  
 PROCNO 1

F2 - Acquisition Parameters  
 Date 20160206  
 Time 21.17  
 INSTRUM av500  
 PROBHD 5 mm DCH 13C-1  
 PULPROG hsqcetgpsisp.2  
 TD 2048  
 SOLVENT DMSO  
 NS 2  
 DS 16  
 SWH 6009.615 Hz  
 FIDRES 2.934382 Hz  
 AQ 0.1703936 sec  
 RG 204.54  
 DW 83.200 usec  
 DE 10.00 usec  
 TE 298.0 K  
 CNST2 145.0000000  
 CNST17 -0.5000000  
 D0 0.00000300 sec  
 D1 1.20000005 sec  
 D4 0.00172414 sec  
 D11 0.03000000 sec  
 D16 0.00020000 sec  
 D24 0.00345000 sec  
 INO 0.00002940 sec

==== CHANNEL f1 =====  
 SFO1 500.1327507 MHz  
 NUC1 1H  
 P1 9.90 usec  
 P2 19.80 usec  
 P28 1000.00 usec  
 PLW1 13.50000000 W

==== CHANNEL f2 =====  
 SFO2 125.7675352 MHz  
 NUC2 13C  
 CPDPRG[2] garp  
 P3 9.63 usec  
 P14 500.00 usec  
 P24 2000.00 usec  
 PCPD2 70.00 usec  
 PLW0 0 W  
 PLW2 23.01399994 W  
 PLW12 0.43557000 W  
 SPNAM[3] Crp60,0.5,20.1  
 SFOAL3 0.500  
 SPOFFS3 0 Hz  
 SPW3 3.26090002 W

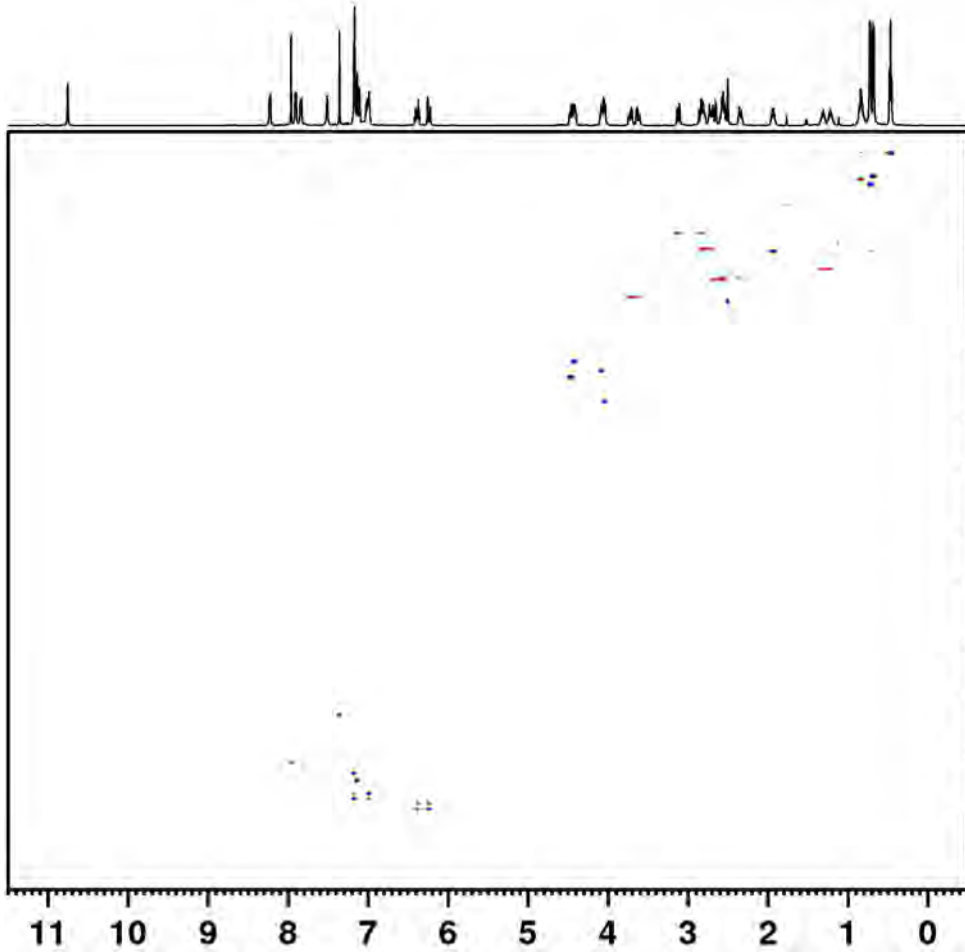

Current Data Parameters  
 NAME TR6-186D1  
 EXPNO 7  
 PROCNO 1

F2 - Acquisition Parameters  
 Date 20160206  
 Time 21.17  
 INSTRUM av500  
 PROBHD 5 mm DCH 13C-1  
 PULPROG hsqcetgpsisp.2  
 TD 2048  
 SOLVENT DMSO  
 NS 2  
 DS 16  
 SWH 6009.615 Hz  
 FIDRES 2.934382 Hz  
 AQ 0.1703936 sec  
 RG 204.54  
 DW 83.200 usec  
 DE 10.00 usec  
 TE 298.0 K  
 CNST2 145.0000000  
 CNST17 -0.5000000  
 D0 0.00000300 sec  
 D1 1.20000005 sec  
 D4 0.00172414 sec  
 D11 0.03000000 sec  
 D16 0.00020000 sec  
 D24 0.00345000 sec  
 INO 0.00002940 sec

==== CHANNEL f1 =====  
 SFO1 500.1327507 MHz  
 NUC1 1H  
 P1 9.90 usec  
 P2 19.80 usec  
 P28 1000.00 usec  
 PLW1 13.50000000 W

==== CHANNEL f2 =====  
 SFO2 125.7675352 MHz  
 NUC2 13C  
 CPDPRG[2] garp  
 P3 9.63 usec  
 P14 500.00 usec  
 P24 2000.00 usec  
 PCPD2 70.00 usec  
 PLW0 0 W  
 PLW2 23.01399994 W  
 PLW12 0.43557000 W  
 SPNAM[3] Crp60,0.5,20.1  
 SFOAL3 0.500  
 SPOFFS3 0 Hz  
 SPW3 3.26090002 W



Acyclic Precursor S1

Current Data Parameters  
 NAME ICON-W-B1  
 EXPNO 1  
 PROCNO 1

F2 - Acquisition Parameters  
 Date\_ 20121013  
 Time 13.06  
 INSTRUM av500  
 PROBHD 5 mm DCH 13C-1  
 FULPROG zg30  
 TD 65536  
 SOLVENT DMSO  
 NS 8  
 DS 0  
 SWH 10000.000 Hz  
 FIDRES 0.152588 Hz  
 AQ 3.2767999 sec  
 RG 11  
 DW 50.000 usec  
 DE 10.00 usec  
 TE 298.0 K  
 D1 2.00000000 sec  
 TDO 1

===== CHANNEL f1 =====  
 NUC1 1H  
 P1 10.00 usec  
 PLW1 13.5000000 W  
 SFO1 500.1330008 MHz

F2 - Processing parameters  
 SI 65536  
 SF 500.1300000 MHz  
 WDW EM  
 SSB 0  
 LB 0.30 Hz  
 GB 0  
 PC 1.00

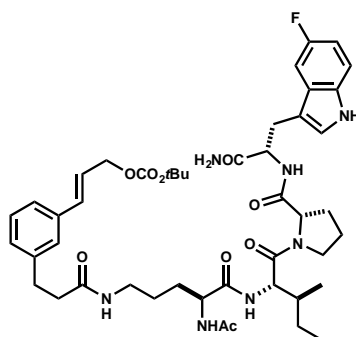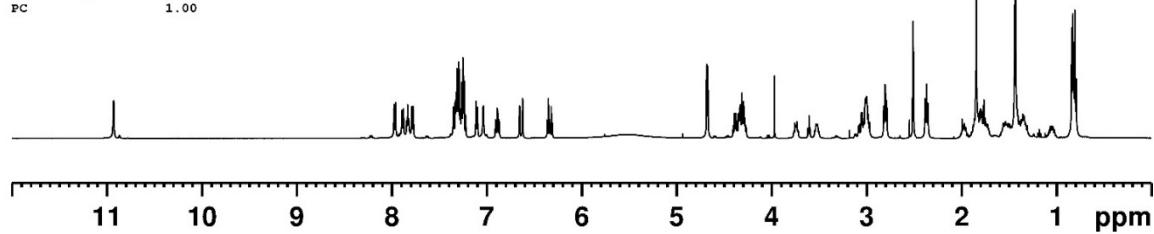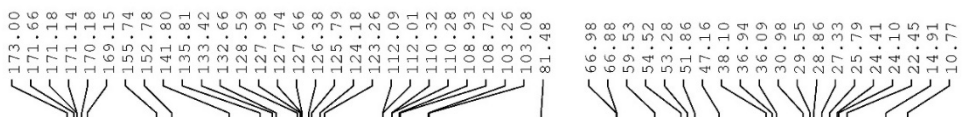

Current Data Parameters  
 NAME ICON-W-B1  
 EXPNO 2  
 PROCNO 1

F2 - Processing parameters  
 SI 131072  
 SF 125.7578519 MHz  
 WDW EM  
 SSB 0  
 LB 1.00 Hz  
 GB 0  
 PC 1.40

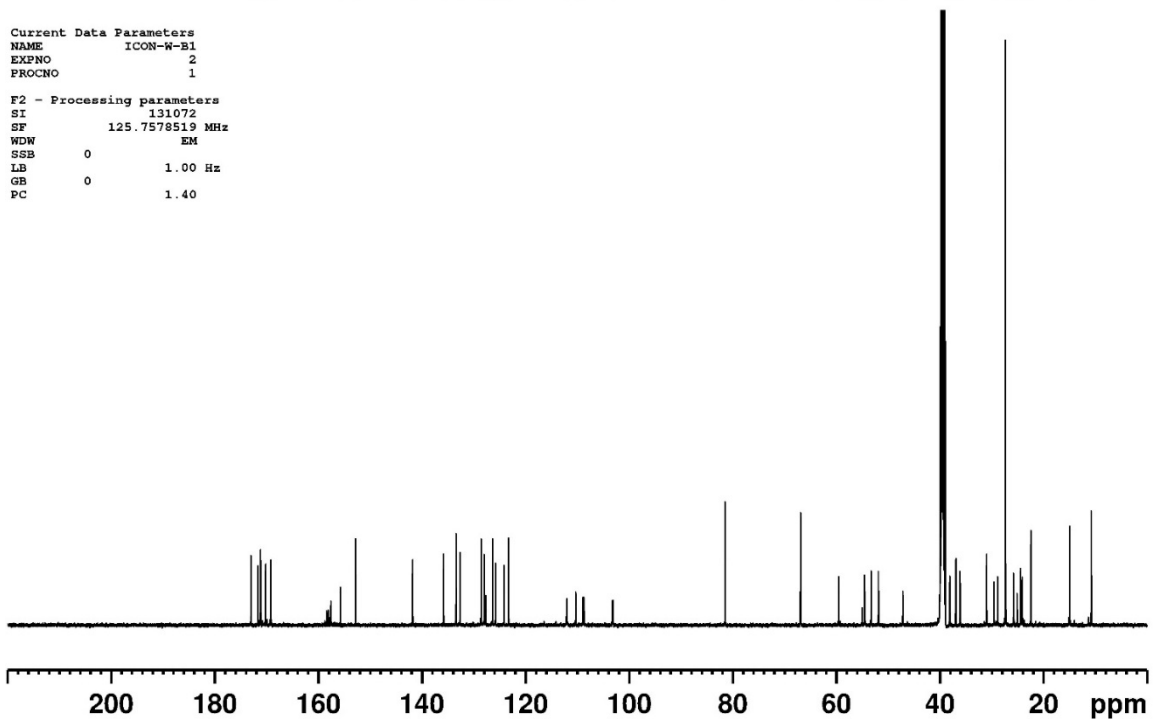

Macrocyclic Product **S2a**

```

Current Data Parameters
NAME      W-B1-1a-4
EXPNO    1
PROCNO    1

F2 - Acquisition Parameters
Date_    20121023
Time     17.13
INSTRUM  av500
PROBHD   5 mm DCH 13C-1
PULPROG  zg30
TD        65536
SOLVENT  DMSO
NS        8
DS        0
SWH       10000.000 Hz
FIDRES    0.152588 Hz
AQ        3.2767999 sec
RG        11
DW        50.000 usec
DE        10.00 usec
TE        298.0 K
D1        2.00000000 sec
TD0       1
    
```

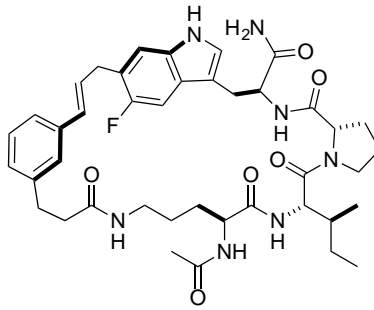

```

===== CHANNEL f1 =====
NUC1      1H
P1        10.00 usec
PLWL      13.50000000 W
SFO1      500.1330008 MHz

F2 - Processing parameters
SI        65536
SF        500.1300055 MHz
WDW       EM
SSB       0
LB        0.30 Hz
GB        0
PC        1.00
    
```

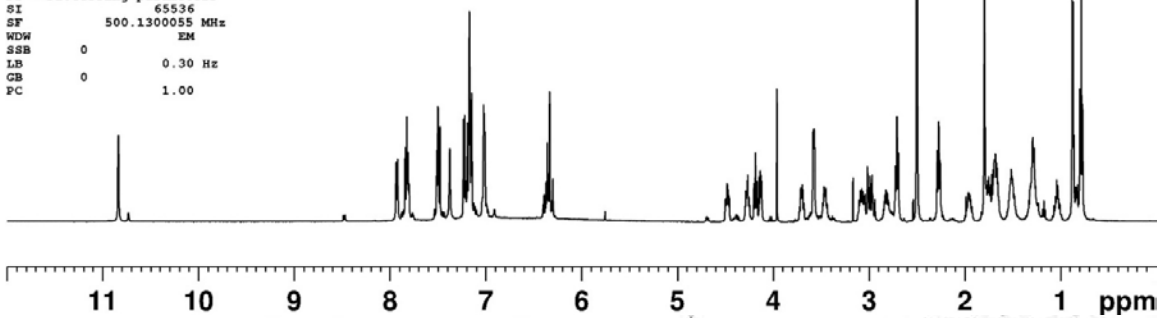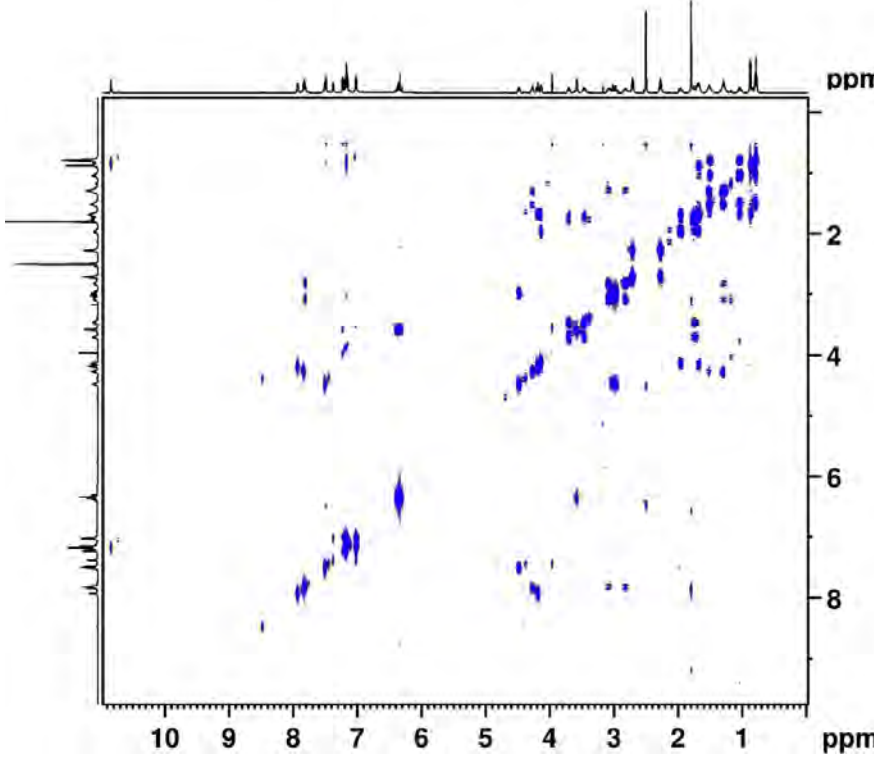

```

Current Data Parameters
NAME      W-B1-1a-4
EXPNO    3
PROCNO    1

F2 - Acquisition Parameters
Date_    20121023
Time     17.18
INSTRUM  av500
PROBHD   5 mm DCH 13C-1
PULPROG  cosygpaqph
TD        4096
SOLVENT  DMSO
NS        2
DS        8
SWH       5498.534 Hz
FIDRES    1.342415 Hz
AQ        0.3724629 sec
RG        202.91
DW        90.933 usec
DE        10.00 usec
TE        298.0 K
D0        0.00008724 sec
D1        2.00000000 sec
D13       0.00000400 sec
D16       0.00020000 sec
INO       0.00019995 sec

===== CHANNEL f1 =====
NUC1      1H
P1        10.00 usec
F2        20.00 usec
PLWL      13.50000000 W
SFO1      500.1327507 MHz

===== GRADIENT CHANNEL =====
GPNAM[1]  SMSQ10.100
GPNAM[2]  SMSQ10.100
GPZ1      10.00 %
GPZ2      20.00 %
P16       1000.00 usec

F1 - Acquisition parameters
TD        256
SFO1      500.1328 MHz
FIDRES    19.536423 Hz
SW        10.000 ppm
FnMODE    States-TPPI

F2 - Processing parameters
SI        4096
SF        500.1300050 MHz
WDW       SINE
SSB       1
    
```

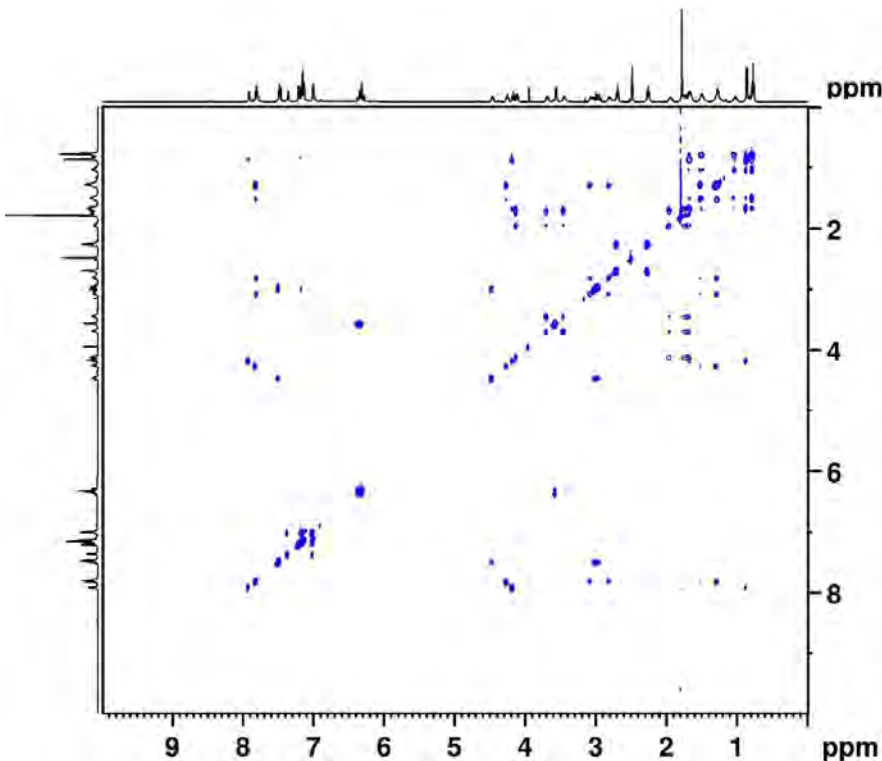

```

Current Data Parameters
NAME      W-B1-1a-4
EXPNO    4
PROCNO   1

F2 - Acquisition Parameters
Date_    20121023
Time     17.39
INSTRUM  av500
PROBHD   5 mm DCH 13C-1
PULPROG  mlevetgp_je
TD       2048
SOLVENT  DMSO
NS       2
DS       8
SWH      5000.000 Hz
FIDRES   2.441406 Hz
AQ       0.2048000 sec
RG       37.94
DW       100.000 usec
DE       10.00 usec
TE       298.0 K
D0       0.0000300 sec
D1       2.0000000 sec
D9       0.0600000 sec
D11      0.0300000 sec
D12      0.0002000 sec
D16      0.0002000 sec
IND      0.00019995 sec
L1       24

===== CHANNEL f1 =====
NUC1     1H
P1       10.00 usec
P2       20.00 usec
P5       26.68 usec
P6       40.00 usec
P7       80.00 usec
P17      2500.00 usec
PLW1     13.5000000 W
PLW10    0.84375000 MHz
SFO1     500.1325007 MHz

===== GRADIENT CHANNEL =====
GPNAM[1] SINE.100
GPNAM[2] SINE.100
GP21     30.00 %
GP22     30.00 %
P16      1000.00 usec

F1 - Acquisition parameters
TD       256
SFO1     500.1325 MHz
FIDRES   19.536406 Hz
  
```

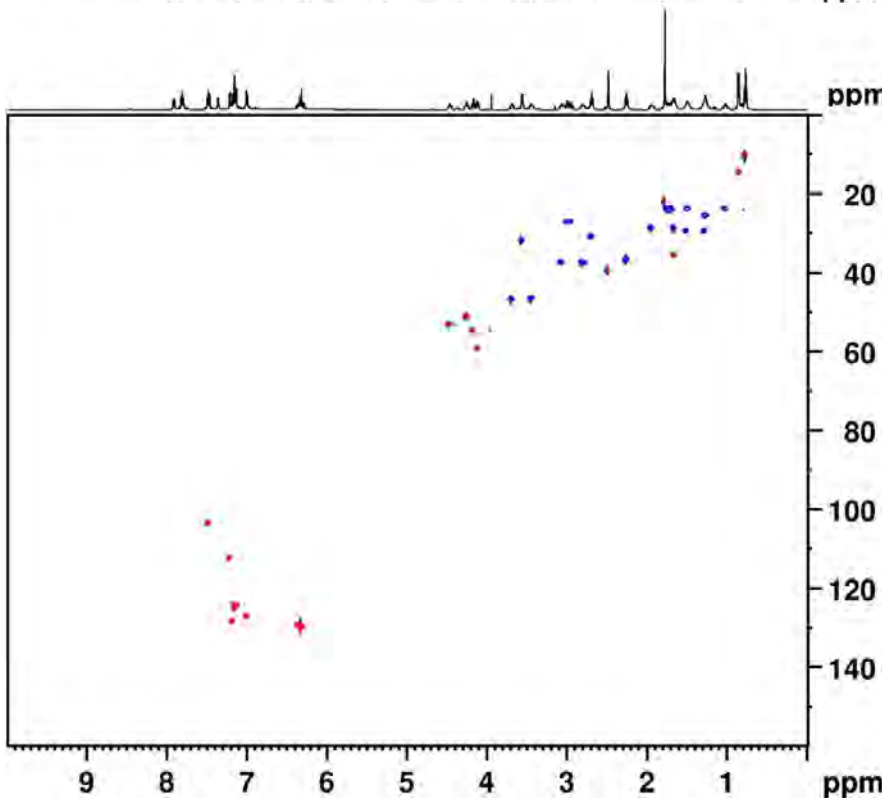

```

Current Data Parameters
NAME      W-B1-1a-4
EXPNO    5
PROCNO   1

F2 - Acquisition Parameters
Date_    20121023
Time     18.00
INSTRUM  av500
PROBHD   5 mm DCH 13C-1
PULPROG  hsqquadetgp
TD       2048
SOLVENT  DMSO
NS       2
DS       16
SWH      5000.000 Hz
FIDRES   2.441406 Hz
AQ       0.2048000 sec
RG       202.91
DW       100.000 usec
DE       10.00 usec
TE       298.0 K
CNST2    145.0000000
D0       0.0000300 sec
D1       1.5000000 sec
D4       0.00172414 sec
D11      0.0300000 sec
D13      0.0000400 sec
D15      0.0002000 sec
D21      0.00345000 sec
IND      0.00001990 sec
ZGPGTNS

===== CHANNEL f1 =====
NUC1     1H
P1       10.00 usec
P2       20.00 usec
P28      0 usec
PLW1     13.5000000 W
SFO1     500.1325007 MHz

===== CHANNEL f2 =====
CPDPRG[2] garp
NUC2     13C
P3       9.63 usec
P4       19.26 usec
PCPD2    70.00 usec
PLW2     23.01799994 W
PLW12    0.43557000 W
SFO2     125.7678496 MHz

===== GRADIENT CHANNEL =====
GPNAM[1] SMSQ10.100
GPNAM[2] SMSQ10.100
GP21     80.00 %
  
```

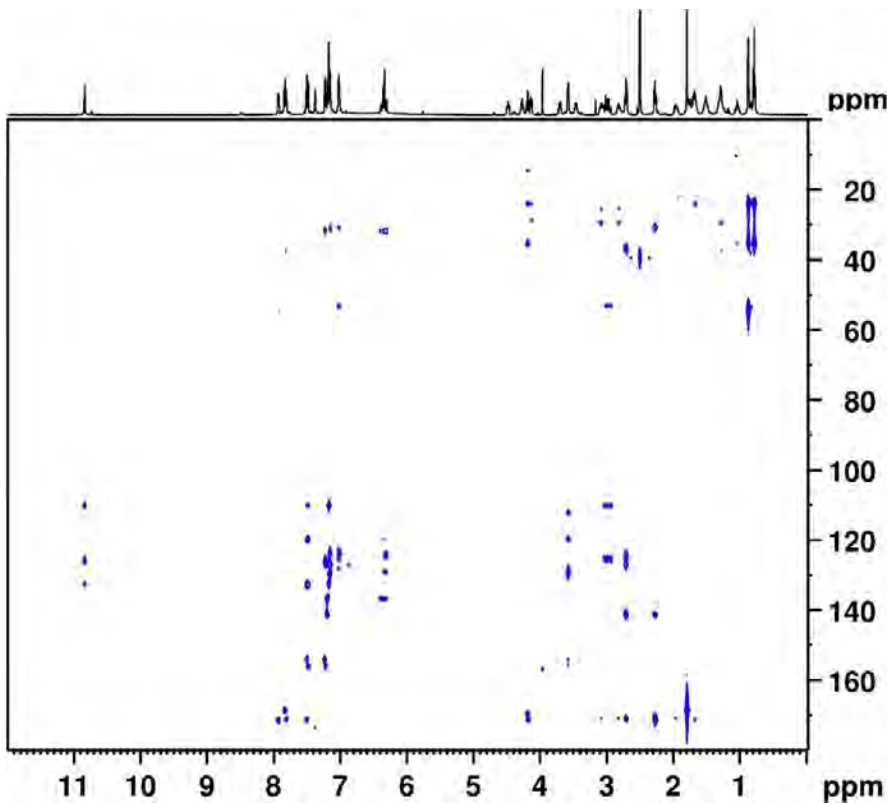

```

Current Data Parameters
NAME          W-B1-1a-4
EXPNO         6
PROCNO        1

F2 - Acquisition Parameters
Date_         20121023
Time          18.15
INSTRUM       av500
PROBHD        5 mm DCH 13C-1
PULPROG       habcgp12ndqf
TD            2048
SOLVENT       DMSO
NS            4
DS            16
SWH           6009.615 Hz
FIDRES        2.934382 Hz
AQ            0.1703936 sec
RG            202.91
DW            83.200 usec
DE            10.00 usec
TE            298.0 K
CNST6         120.0000000
CNST7         160.0000000
CNST13        7.0000000
D0            0.00000200 sec
D1            1.50000000 sec
D6            0.07142857 sec
D16           0.00020000 sec
IN0           0.00001990 sec

===== CHANNEL f1 =====
NUC1           1H
P1            10.00 usec
P2            20.00 usec
PLN1          13.50000000 W
SFO1          500.1330008 MHz

===== CHANNEL f2 =====
NUC2           13C
P3             9.63 usec
PLW2          23.01399994 W
SFO2          125.7703648 MHz

===== GRADIENT CHANNEL =====
GPNAM[1]       SMSQ10.100
GPNAM[2]       SMSQ10.100
GPNAM[3]       SMSQ10.100
GPNAM[4]       SMSQ10.100
GPNAM[5]       SMSQ10.100
GPNAM[6]       SMSQ10.100
GPZ1           50.00 %
GPZ2           30.00 %
GPZ3           40.10 %
GPZ4           15.00 %

```

Macrocyclic Product **S2b**

```

Current Data Parameters
NAME      W-B1-2
EXPNO    1
PROCNO   1

F2 - Acquisition Parameters
Date_    20121020
Time     13.37
INSTRUM  av500
PROBHD   5 mm DCH 13C-1
PULPROG  zg30
TD       65536
SOLVENT  DMSO
NS       8
DS       0
SWH      10000.000 Hz
FIDRES   0.152588 Hz
AQ       3.2767999 sec
RG       15.53
DW       50.000 usec
DE       10.00 usec
TE       298.0 K
D1       2.00000000 sec
D10      1

===== CHANNEL f1 =====
NUC1     1H
P1       10.00 usec
PLW1     13.50000000 W
SFO1     500.1330008 MHz

F2 - Processing parameters
SI       65536
SF       500.1300146 MHz
WDW      EM
SSB      0
LB       0.30 Hz
GB       0
PC       1.00
    
```

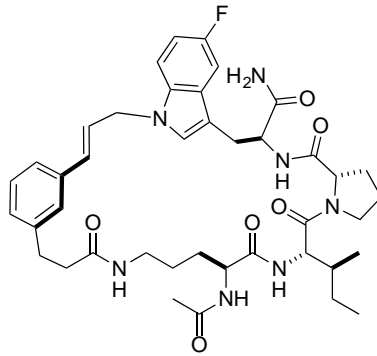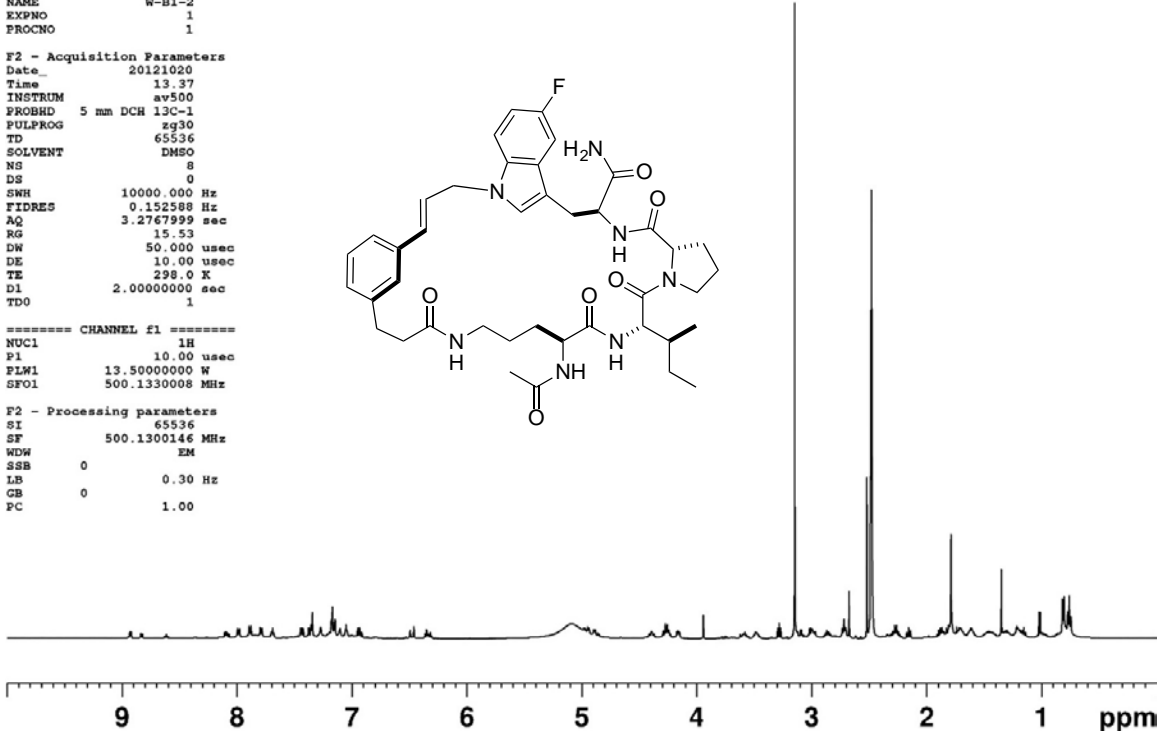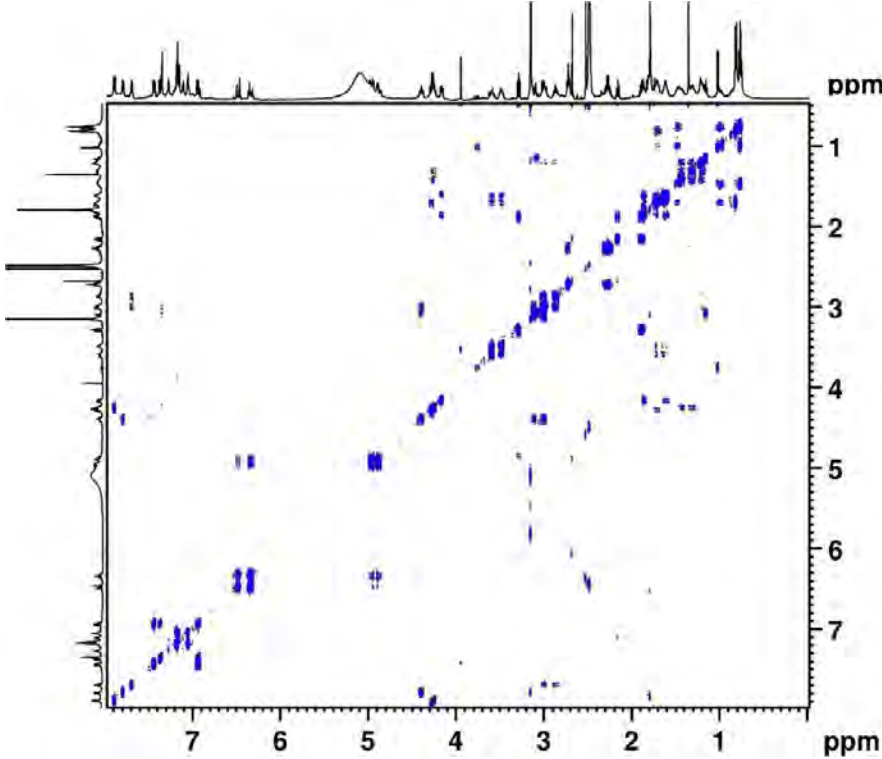

```

Current Data Parameters
NAME      W-B1-2
EXPNO    3
PROCNO   1

F2 - Acquisition Parameters
Date_    20121020
Time     13.44
INSTRUM  av500
PROBHD   5 mm DCH 13C-1
PULPROG  cosygpcph
TD       4096
SOLVENT  DMSO
NS       2
DS       8
SWH      5498.534 Hz
FIDRES   1.342415 Hz
AQ       0.3724629 sec
RG       202.91
DW       90.933 usec
DE       10.00 usec
TE       298.0 K
D0       0.00008724 sec
D1       2.00000000 sec
D13      0.00000400 sec
D16      0.00020000 sec
IN0      0.00019995 sec

===== CHANNEL f1 =====
NUC1     1H
P1       10.00 usec
P2       20.00 usec
PLW1     13.50000000 W
SFO1     500.1327507 MHz

===== GRADIENT CHANNEL =====
GPMAM[1] SMSQ10.100
GPMAM[2] SMSQ10.100
GPE1     10.00 %
GPE2     20.00 %
P16      1000.00 usec

F1 - Acquisition parameters
TD       256
SFO1     500.1328 MHz
FIDRES   19.536423 Hz
SW       10.000 ppm
F1MODE   States-TPPI

F2 - Processing parameters
SI       4096
SF       500.1300135 MHz
WDW      SINE
SSB      1
    
```

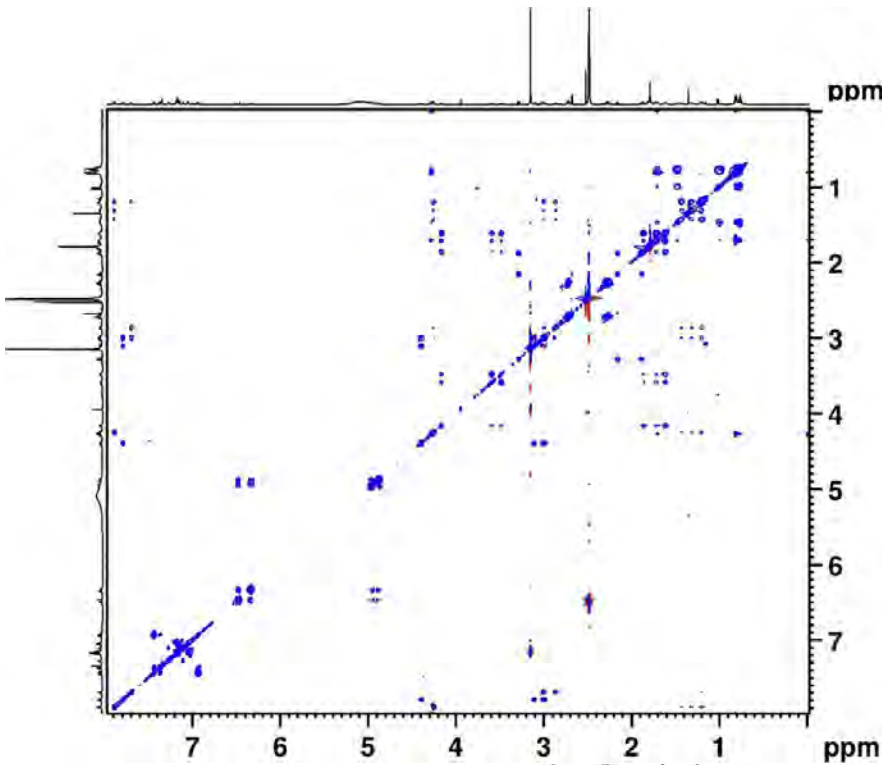

Current Data Parameters  
 NAME W-B1-2  
 EXPNO 6  
 PROCNO 1

F2 - Acquisition Parameters  
 Date\_ 20121020  
 Time 14.51  
 INSTRUM av500  
 PROBHD 5 mm DCH 13C-1  
 PULPROG mlevetgp.js  
 TD 2048  
 SOLVENT DMSO  
 NS 2  
 DS 8  
 SWH 4000.000 Hz  
 FIDRES 1.953125 Hz  
 AQ 0.256000 sec  
 RG 27.94  
 DW 125.000 usec  
 DE 10.00 usec  
 TE 298.0 K  
 D0 0.0000300 sec  
 D1 2.0000000 sec  
 D2 0.0600000 sec  
 D11 0.0300000 sec  
 D12 0.0002000 sec  
 D16 0.0002000 sec  
 INO 0.00024995 sec  
 L1 24

\*\*\*\*\* CHANNEL f1 \*\*\*\*\*  
 NUC1 1H  
 P1 10.00 usec  
 P2 20.00 usec  
 P5 26.68 usec  
 P6 40.00 usec  
 P7 80.00 usec  
 P17 2500.00 usec  
 PLW1 13.5000000 W  
 PLW10 0.84375000 W  
 SFO1 500.1320005 MHz

\*\*\*\*\* GRADIENT CHANNEL \*\*\*\*\*  
 GPMAN[1] SINK.100  
 GPMAN[2] SINK.100  
 GPE1 30.00 %  
 GPE2 30.00 %  
 P16 1000.00 usec

F1 - Acquisition parameters  
 TD 256  
 SFO1 500.132 MHz  
 FIDRES 15.629138 Hz

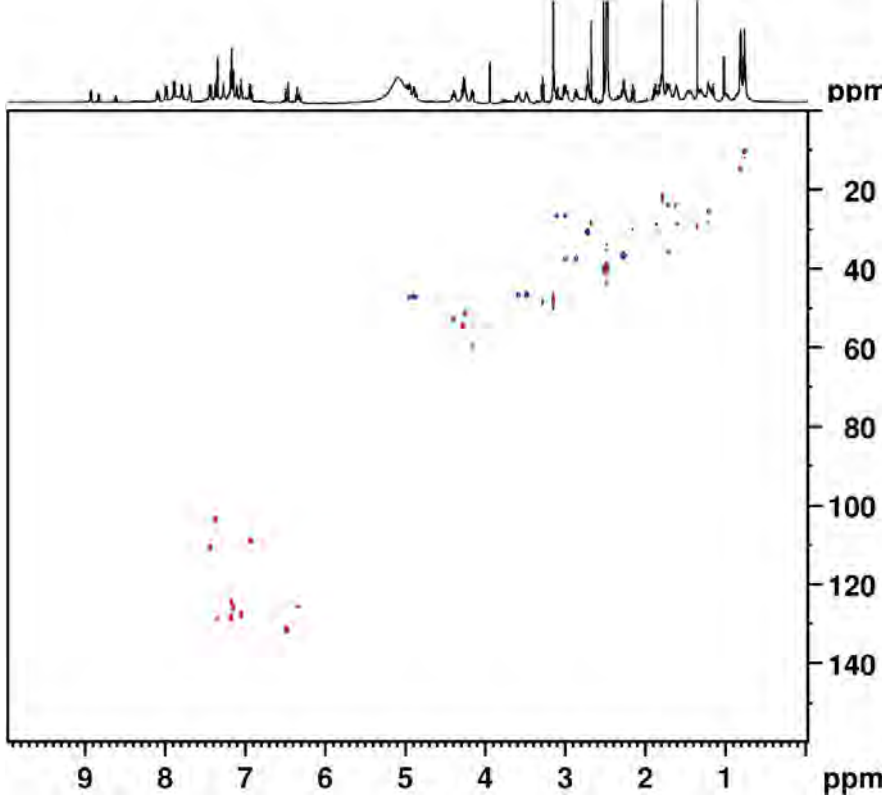

Current Data Parameters  
 NAME W-B1-2  
 EXPNO 4  
 PROCNO 1

F2 - Acquisition Parameters  
 Date\_ 20121020  
 Time 14.05  
 INSTRUM av500  
 PROBHD 5 mm DCH 13C-1  
 PULPROG hsqcudetgp  
 TD 2048  
 SOLVENT DMSO  
 NS 2  
 DS 16  
 SWH 5000.000 Hz  
 FIDRES 2.441406 Hz  
 AQ 0.2048000 sec  
 RG 202.91  
 DW 100.000 usec  
 DE 10.00 usec  
 TE 298.0 K  
 CNST2 145.0000000  
 D0 0.0000300 sec  
 D1 1.5000000 sec  
 D4 0.00172414 sec  
 D11 0.0300000 sec  
 D13 0.0000400 sec  
 D16 0.0002000 sec  
 D21 0.00345000 sec  
 INO 0.00001990 sec  
 ZGPTNS

\*\*\*\*\* CHANNEL f1 \*\*\*\*\*  
 NUC1 1H  
 P1 10.00 usec  
 P2 20.00 usec  
 P28 0 usec  
 PLW1 13.5000000 W  
 SFO1 500.1325007 MHz

\*\*\*\*\* CHANNEL f2 \*\*\*\*\*  
 CPDPRG[2] garp  
 NUC2 13C  
 P3 9.63 usec  
 P4 19.26 usec  
 PCPD2 70.00 usec  
 PLW2 23.01399994 W  
 PLW12 0.43557000 W  
 SFO2 125.7678496 MHz

\*\*\*\*\* GRADIENT CHANNEL \*\*\*\*\*  
 GPMAN[1] SMSQ10.100  
 GPMAN[2] SMSQ10.100  
 GPE1 80.00 %

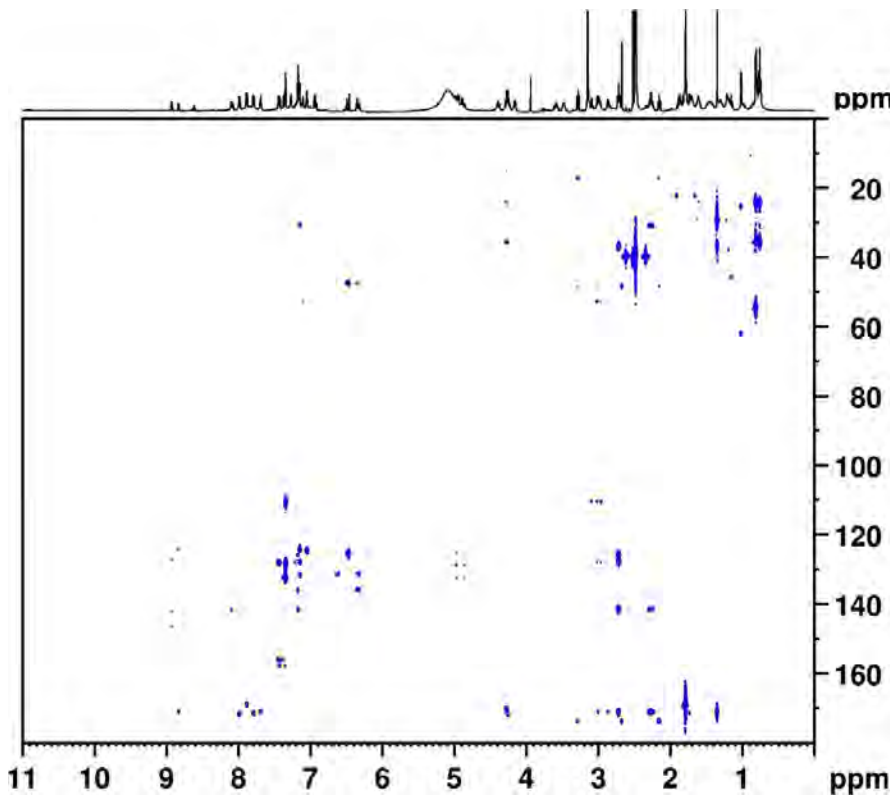

```

Current Data Parameters
NAME          W-B1-2
EXPNO        5
PROCNO       1

F2 - Acquisition Parameters
Date_        20121020
Time         14.20
INSTRUM      av500
PROBHD       5 mm DCH 13C-1
PULPROG      hmbcgp12ndqf
TD           2048
SOLVENT      DMSO
NS           4
DS           16
SWH          6009.615 Hz
FIDRES       2.934382 Hz
AQ           0.1703936 sec
RG           202.91
DW           83.200 usec
DE           10.00 usec
TE           298.0 K
CNST6        120.0000000
CNST7        160.0000000
CNST13       7.0000000
D0           0.00000300 sec
D1           1.50000000 sec
D6           0.07142857 sec
D16          0.00020000 sec
IN0          0.00001990 sec

===== CHANNEL f1 =====
NUC1         1H
P1           10.00 usec
P2           20.00 usec
PLW1         13.50000000 W
SFO1         500.1330008 MHz

===== CHANNEL f2 =====
NUC2         13C
P3           9.63 usec
PLW2         23.01399994 W
SFO2         125.7703648 MHz

===== GRADIENT CHANNEL =====
GPNAM[1]    SMSQ10.100
GPNAM[2]    SMSQ10.100
GPNAM[3]    SMSQ10.100
GPNAM[4]    SMSQ10.100
GPNAM[5]    SMSQ10.100
GPNAM[6]    SMSQ10.100
GPZ1        50.00 %
GPZ2        30.00 %
GPZ3        40.10 %
GPZ4        15.00 %

```

Acyclic Precursor S3

Current Data Parameters  
 NAME KL-5-103  
 EXPNO 1  
 PROCNO 1

F2 - Acquisition Parameters  
 Date\_ 20121218  
 Time 10.37  
 INSTRUM av500  
 PROBHD 5 mm DCH 13C-1  
 PULPROG zg30  
 TD 65536  
 SOLVENT DMSO  
 NS 8  
 DS 0  
 SWH 10000.000 Hz  
 FIDRES 0.152588 Hz  
 AQ 3.2767393 sec  
 RG 11  
 DW 50.000 usec  
 DE 10.00 usec  
 TE 298.0 K  
 D1 2.0000000 sec  
 TDO 1

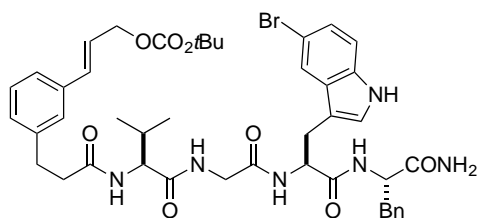

===== CHANNEL f1 =====  
 SFO1 500.1330008 MHz  
 NUC1 1H  
 P1 10.00 usec  
 PLW1 13.5000000 W

F2 - Processing parameters  
 SI 65536  
 SF 500.1300052 MHz  
 WDW EM  
 SSB 0  
 LB 0.30 Hz  
 GB 0  
 PC 1.00

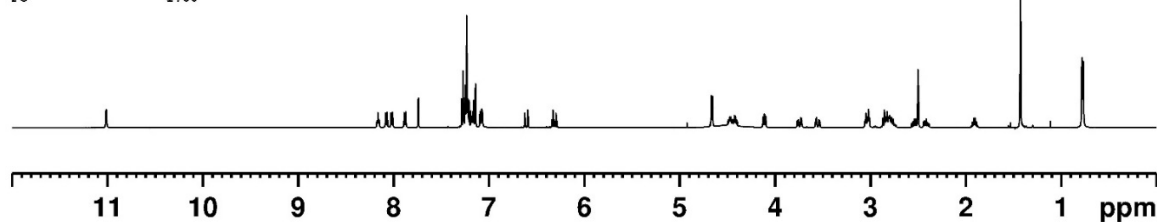

173.15  
 172.18  
 172.10  
 171.49  
 169.19  
 153.27  
 142.13  
 138.39  
 136.27  
 135.16  
 133.91  
 129.67  
 129.59  
 129.02  
 128.53  
 126.81  
 126.69  
 125.90  
 124.70  
 123.74  
 123.70  
 121.12  
 113.76  
 111.50  
 110.37

81.97

67.36

58.49  
 54.45  
 53.93

42.39  
 37.85  
 36.95  
 31.42  
 30.61  
 27.85  
 19.62  
 18.59

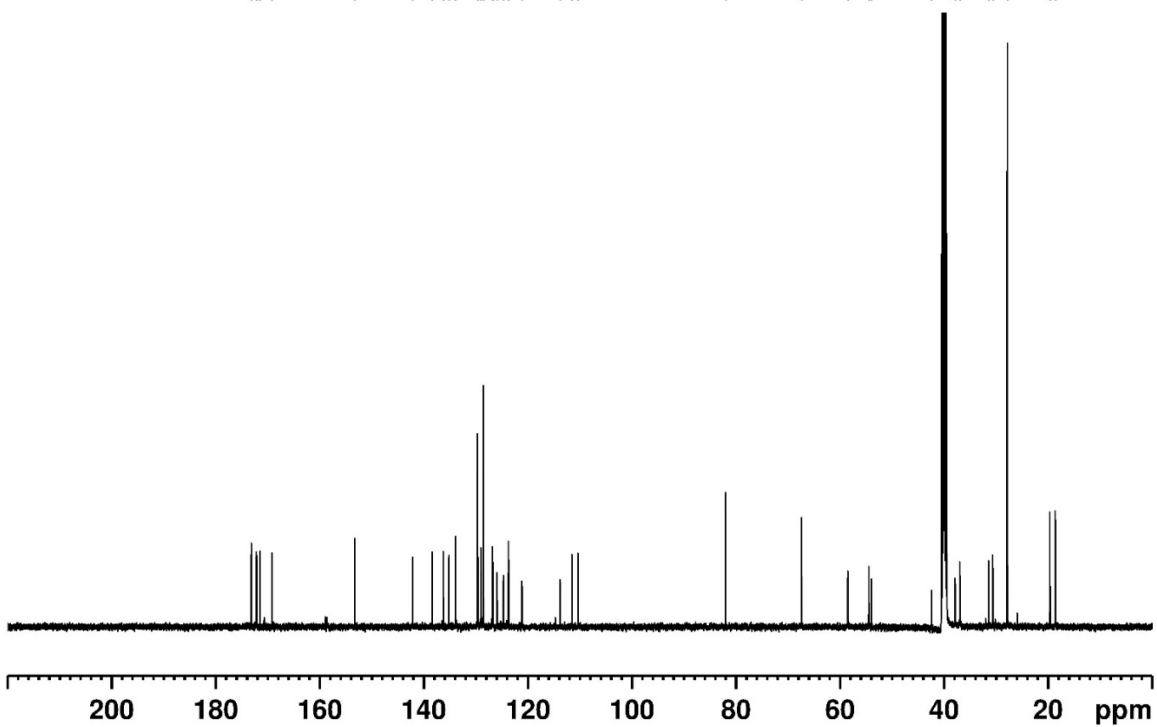



Macrocyclic Product **S4a**

```

Current Data Parameters
NAME      KL-5-105-1
EXPNO    2
PROCNO   1

F2 - Acquisition Parameters
Date_    20130103
Time     17.05
INSTRUM  av600
PROBHD   5 mm TBI5
PULPROG  zg
TD        65536
SOLVENT  DMSO
NS        8
DS        0
SWH       12376.237 Hz
FIDRES    0.188846 Hz
AQ        2.6476543 sec
RG        90.5
DW        40.400 usec
DE        6.50 usec
TE        293.0 K
D1        2.00000000 sec
TD0       1
    
```

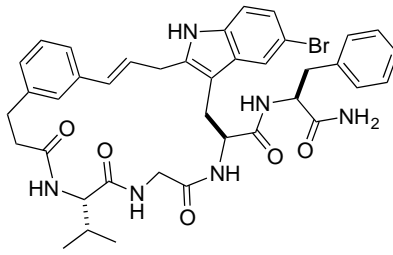

```

----- CHANNEL f1 -----
NUC1      1H
P1        9.55 usec
PL1       -2.00 dB
PL1W      39.81071854 W
SFO1      600.1336008 MHz

F2 - Processing parameters
SI        65536
SF        600.1300072 MHz
WDW       EM
SSB       0
LB        0.30 Hz
GB        0
PC        1.00
    
```

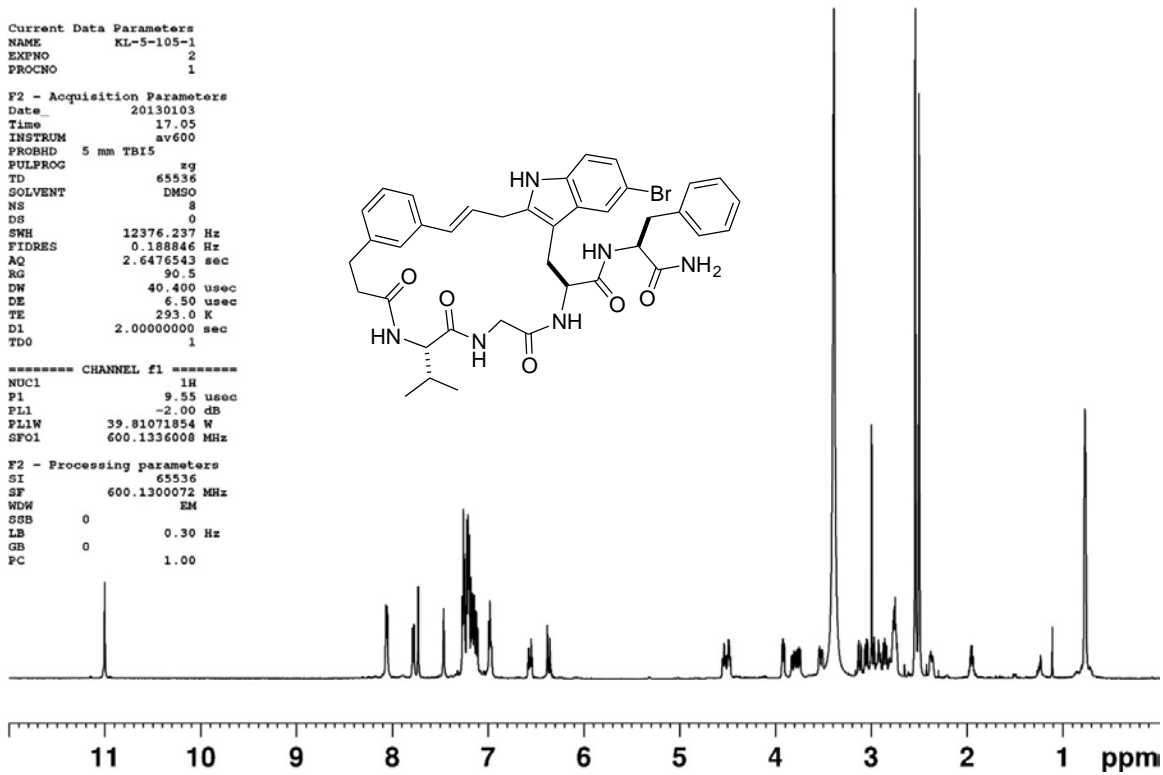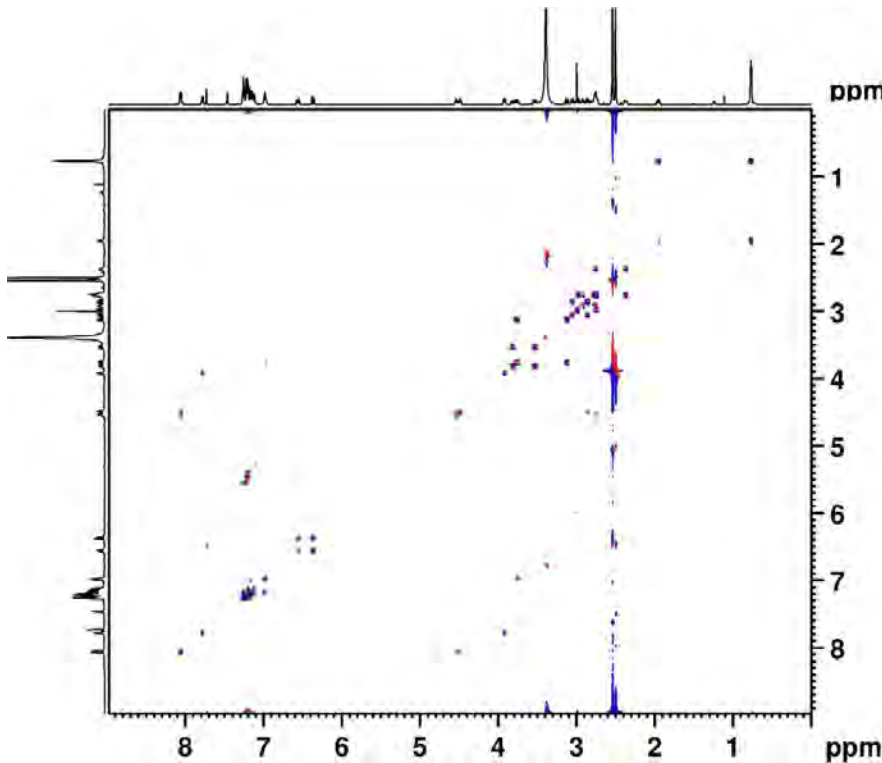

```

Current Data Parameters
NAME      KL-5-105-1
EXPNO    2
PROCNO   1

F2 - Acquisition Parameters
Date_    20130103
Time     17.09
INSTRUM  av600
PROBHD   5 mm TBI5
PULPROG  coesyppm1ph
TD        2048
SOLVENT  DMSO
NS        1
DS        16
SWH       5387.931 Hz
FIDRES    2.630826 Hz
AQ        0.1900544 sec
RG        90.5
DW        92.800 usec
DE        6.50 usec
TE        293.0 K
D0        0.00008064 sec
D1        1.50000000 sec
D13       0.00000400 sec
D16       0.00020000 sec
IN0       0.00018560 sec

----- CHANNEL f1 -----
NUC1      1H
P1        9.55 usec
P2        19.10 usec
PL1       -2.00 dB
PL1W      39.81071854 W
SFO1      600.1327006 MHz

----- GRADIENT CHANNEL -----
GPHAM[1]  SINE.100
GPHAM[2]  SINE.100
GPX1      0 %
GPX2      0 %
GPY1      0 %
GPY2      0 %
GP21      10.00 %
GP22      20.00 %
Pie       1000.00 usec

F1 - Acquisition parameters
TD        512
SFO1      600.1327 MHz
FIDRES    10.523297 Hz
SW        8.978 ppm
ENDCODE   States-TPPI
    
```

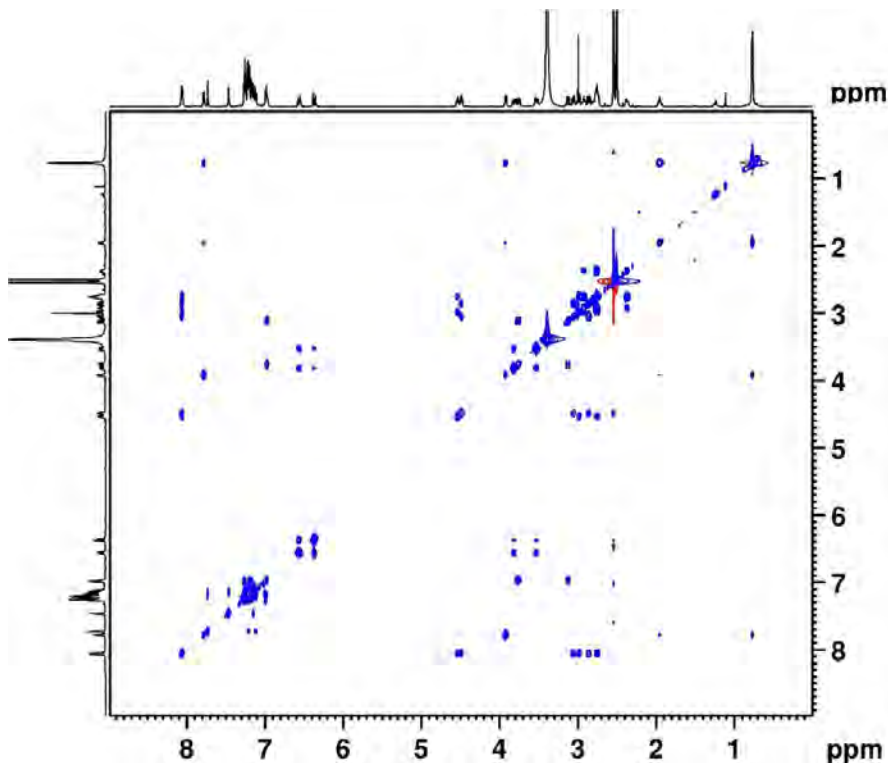

```

Current Data Parameters
NAME      KL-5-105-1
EXPNO    4
PROCNO   1

F2 - Acquisition Parameters
Date_    20130103
Time     17.25
INSTRUM  av600
PROBHD   5 mm TBI5
PULPROG  dipol2etppol
TD        2048
SOLVENT  DMSO
NS        8
DS        16
SWH       5387.931 Hz
FIDRES    2.630826 Hz
AQ        0.1900544 sec
RG        352
DW        92.800 usec
DE        6.50 usec
TE        293.0 K
D0        0.0000300 sec
D1        1.5000000 sec
D2        0.0600000 sec
D11       0.0300000 sec
D16       0.0002000 sec
D20       0.0000100 sec
D21       0.0000100 sec
IN0       0.00018560 sec
L1        14

===== CHANNEL f1 =====
NUC1      1H
P1        9.55 usec
P2        19.10 usec
P6        40.00 usec
PL1       -2.00 dB
PL10      10.44 dB
PL1W      39.81071854 W
PL1OW     2.26986504 W
SFO1      600.1327006 MHz

===== GRADIENT CHANNEL =====
GPMAM[1]  SINE.100
GPMAM[2]  SINE.100
GPK1      0 %
GPK2      0 %
GPT1      0 %
GPT2      0 %
GP21      30.00 %
GP22      30.00 %
P16       1000.00 usec
  
```

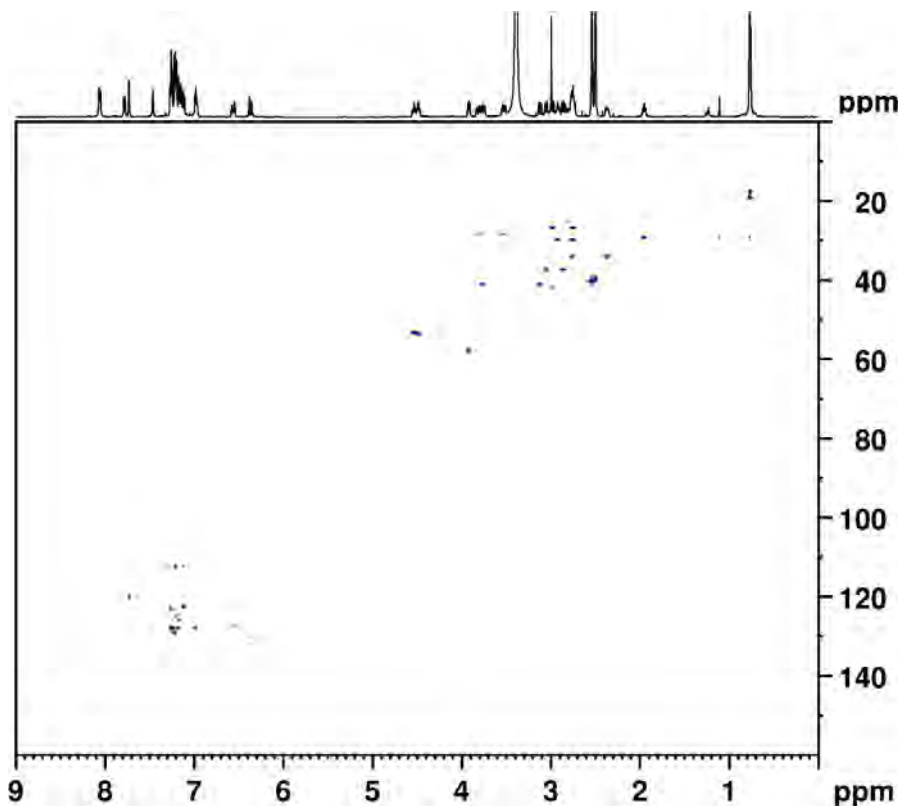

```

Current Data Parameters
NAME      KL-5-105-1
EXPNO    5
PROCNO   1

F2 - Acquisition Parameters
Date_    20130103
Time     17.56
INSTRUM  av600
PROBHD   5 mm TBI5
PULPROG  hsqcotgpcieip
TD        2048
SOLVENT  DMSO
NS        8
DS        16
SWH       6009.615 Hz
FIDRES    2.934382 Hz
AQ        0.1703936 sec
RG        26008
DW        83.200 usec
DE        6.00 usec
TE        293.0 K
CMST2    145.0000060
D0        0.0000300 sec
D1        1.0000000 sec
D4        0.00172414 sec
D11       0.0300000 sec
D16       0.0002000 sec
D24       0.00086200 sec
IN0       0.00002070 sec
ZGQPTNS

===== CHANNEL f1 =====
NUC1      1H
P1        9.55 usec
P2        19.10 usec
P6        1000.00 usec
PL1       -2.00 dB
PL1W      39.81071854 W
SFO1      600.1327006 MHz

===== CHANNEL f2 =====
CPDPRG[2]  garp
NUC2      13C
P3        18.50 usec
P4        37.00 usec
P14       1000.00 usec
PCPD2     65.00 usec
P10       120.00 dB
P12       -3.00 dB
P112      7.91 dB
PLOW      0 W
PL2W      150.35617065 W
PL12W     12.19330025 W
SFO2      150.9133722 MHz
  
```

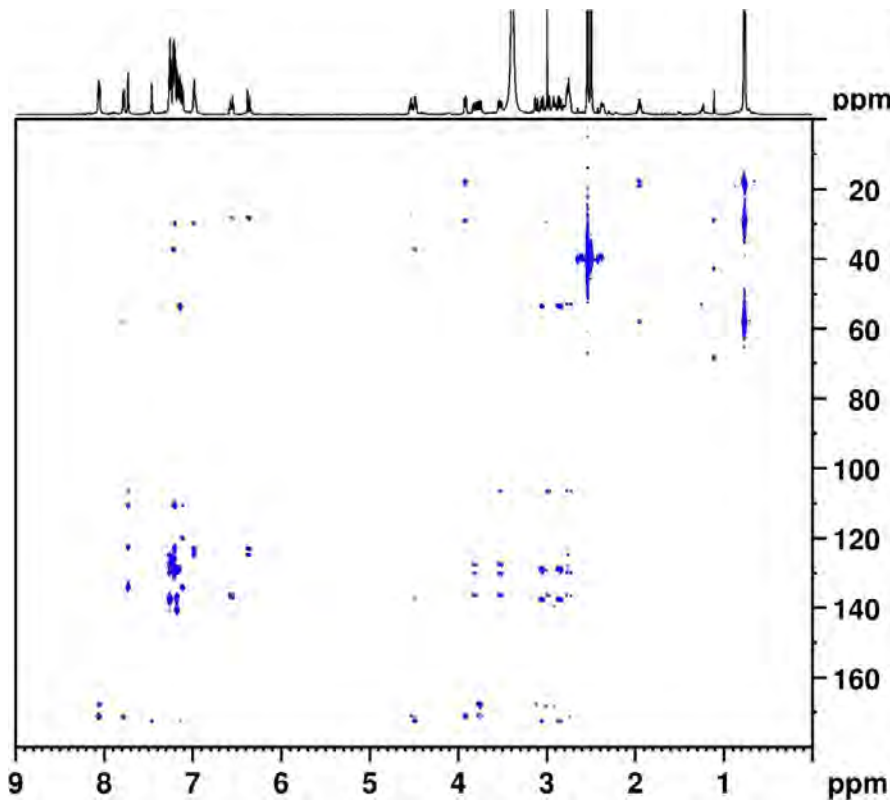

```

Current Data Parameters
NAME      KL-5-105-1
EXPNO    6
PROCNO   1

F2 - Acquisition Parameters
Date_    20130103
Time     19.19
INSTRUM  av600
PROBHD   5 mm TB15
PULPROG  hmbogp12ndqf
TD        2048
SOLVENT  DMSO
NS        32
DS        24
SWH       6009.615 Hz
FIDRES    2.934382 Hz
AQ        0.1703936 sec
RG        26008
DW        83.200 usec
DE        6.00 usec
TE        293.0 K
CNST6    125.0000000
CNST7    165.0000000
CNST13   8.0000000
D0        0.0000000 sec
D1        1.2000000 sec
D6        0.0625000 sec
D16       0.0002000 sec
IN0       0.00001745 sec

===== CHANNEL f1 =====
NUC1      1H
P1        9.55 usec
P2        19.10 usec
PL1       -2.00 dB
PL1W      39.81071854 W
SFO1      600.1327006 MHz

===== CHANNEL f2 =====
NUC2      13C
P3        18.50 usec
PL2       -3.00 dB
PL2W      150.35617065 W
SFO2      150.9156337 MHz

===== GRADIENT CHANNEL =====
GPNAM[1]  SINE 100
GPNAM[2]  SINE 100
GPNAM[3]  SINE 100
GPNAM[4]  SINE 100
GPNAM[5]  SINE 100
GPNAM[6]  SINE 100
GFX1     0 %
GFX2     0 %

```

Macrocyclic Product **S4b**

```

Current Data Parameters
NAME      KL-5-105-2_TROSE
EXPNO    6
PROCNO   1

F2 - Acquisition Parameters
Date_    20130107
Time     19.14
INSTRUM av600
PROBHD   5 mm BB5
PULPROG  zg
TD        65536
SOLVENT  DMSO
NS        8
DS        0
SWH       12376.237 Hz
FIDRES   0.188846 Hz
AQ        2.6476543 sec
RG        71.8
DW        40.400 usec
DE        6.50 usec
TE        340.0 K
D1        2.0000000 sec
TD0       1
    
```

```

----- CHANNEL f1 -----
NUC1      1H
P1        16.10 usec
PL1       -1.00 dB
PL1W      31.62277603 W
SFO1      600.1336008 MHz
    
```

```

F2 - Processing parameters
SI        65536
SF        600.1300000 MHz
WDW       EM
SSB       0
LB        0 Hz
GB        0
PC        1.00
    
```

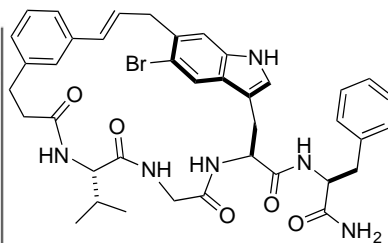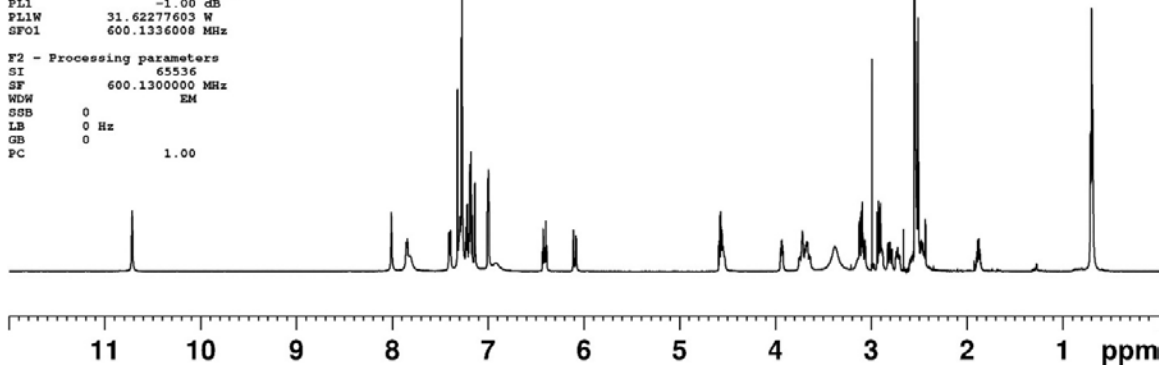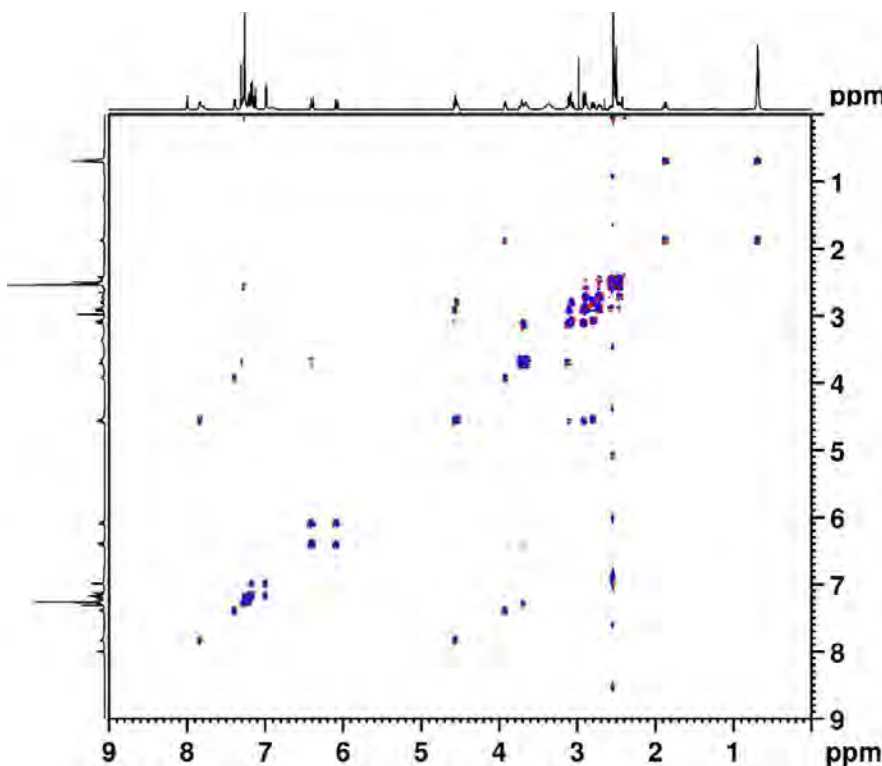

```

Current Data Parameters
NAME      KL-5-105-2
EXPNO    10
PROCNO   1
    
```

```

F2 - Acquisition Parameters
Date_    20130107
Time     19.17
INSTRUM av600
PROBHD   5 mm BB5
PULPROG  cosygpmph
TD        2048
SOLVENT  DMSO
NS        1
DS        16
SWH       7183.908 Hz
FIDRES   3.507768 Hz
AQ        0.1425408 sec
RG        71.8
DW        69.600 usec
DE        6.50 usec
TE        340.0 K
D0        0.00004910 sec
D1        1.50000000 sec
D13       0.00000400 sec
D16       0.00020000 sec
IN0       0.00013920 sec
    
```

```

----- CHANNEL f1 -----
NUC1      1H
P1        16.10 usec
P2        32.20 usec
PL1       -1.00 dB
PL1W      31.62277603 W
SFO1      600.1336008 MHz
    
```

```

----- GRADIENT CHANNEL -----
GPMAM[1]  SINE 100
GPMAM[2]  SINE 100
GPE1     10.00 %
GPE2     20.00 %
P16      1000.00 usec
    
```

```

F1 - Acquisition parameters
TD        512
SFO1      600.1336 MHz
FIDRES    14.031092 Hz
SN        11.971 ppm
F2MODE    Stabes-TFPI
    
```

```

F2 - Processing parameters
SI        2048
SF        600.1300001 MHz
WDW       QSINE
    
```

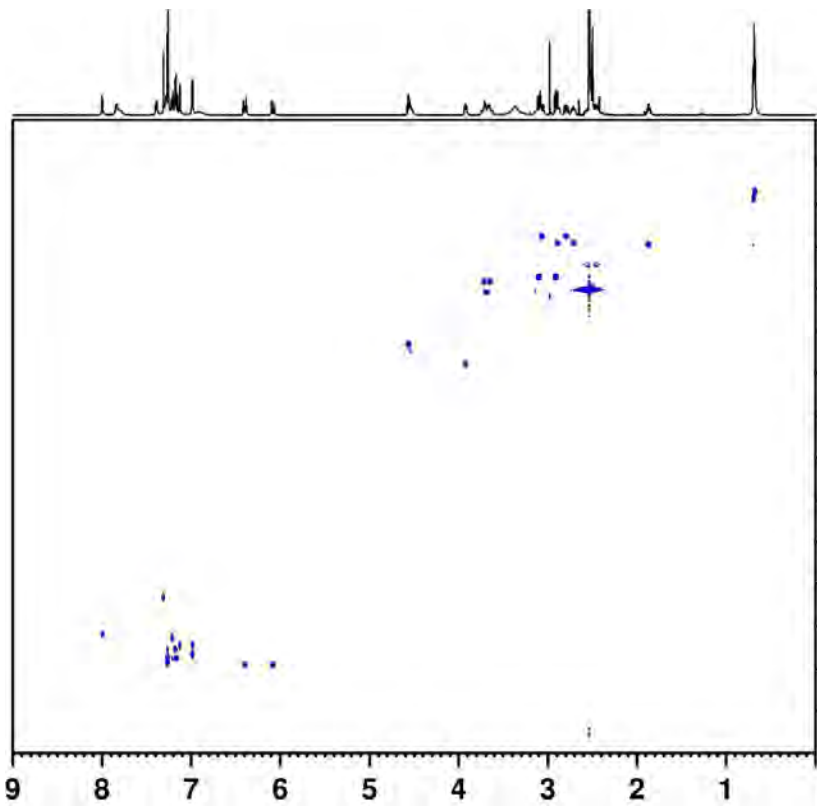

```

Current Data Parameters
NAME          KL5-105-2
EXPNO         11
PROCNO        1

F2 - Acquisition Parameters
Date_         20130107
Time          20.07
INSTRUM       av600
PROBHD        5 mm BB5
PULPROG       hsqcqtzpsisp
TD            2048
SOLVENT       DMSO
NS            16
DS            16
SWH           6009.615 Hz
FIDRES        2.934382 Hz
AQ            0.1703936 sec
RG            26008
DW            93.200 usec
DE            6.00 usec
TE            340.0 K
CNST2         145.0000000
D0            0.00000300 sec
D1            1.00000000 sec
D4            0.00172414 sec
D11           0.03000000 sec
D16           0.00020000 sec
D24           0.00086200 sec
IN0           0.00002070 sec
ZGPGTMS

===== CHANNEL f1 =====
NUC1           1H
P1             16.10 usec
P2             32.20 usec
P2B            1000.00 usec
PL1            -1.00 dB
PL1W           31.62277603 W
SFO1           600.1327006 MHz

===== CHANNEL f2 =====
CPDPRG[2]     gArp
NUC2           13C
P3             9.75 usec
P4             19.50 usec
P14            1000.00 usec
PCPD2         65.00 usec
PL0            120.00 dB
PL2            0 dB
PL12           16.48 dB
PLOW           0 W
PL2W           75.35659027 W
PL12W          1.69481111 W
SFO2           150.9133722 MHz
  
```

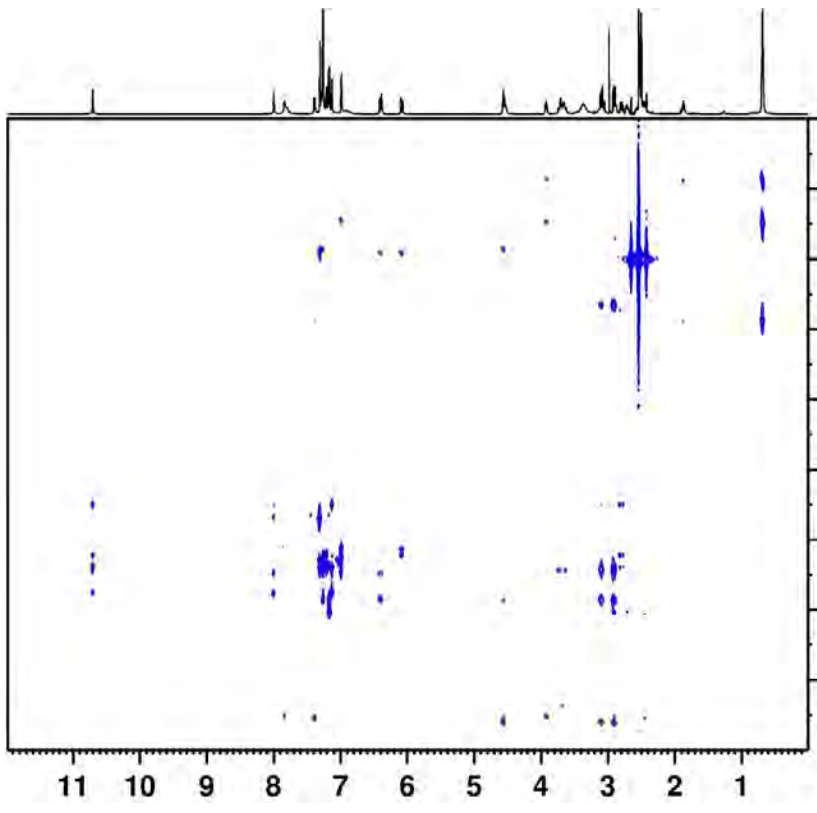

```

Current Data Parameters
NAME          KL5-105-2
EXPNO         12
PROCNO        1

F2 - Acquisition Parameters
Date_         20130107
Time          20.40
INSTRUM       av600
PROBHD        5 mm BB5
PULPROG       hmbcggp12ndqf
TD            2048
SOLVENT       DMSO
NS            32
DS            24
SWH           7183.908 Hz
FIDRES        3.507768 Hz
AQ            0.1425408 sec
RG            26008
DW            69.600 usec
DE            6.00 usec
TE            340.0 K
CNST6         125.0000000
CNST7         165.0000000
CNST13        8.00000000
D0            0.00000300 sec
D1            1.20000005 sec
D6            0.06250000 sec
D16           0.00020000 sec
IN0           0.00001745 sec

===== CHANNEL f1 =====
NUC1           1H
P1             16.10 usec
P2             32.20 usec
PL1            -1.00 dB
PL1W           31.62277603 W
SFO1           600.1336008 MHz

===== CHANNEL f2 =====
NUC2           13C
P3             9.75 usec
PL2            0 dB
PL2W           75.35659027 W
SFO2           150.9163903 MHz

===== GRADIENT CHANNEL =====
GPNAM[1]       SINE.100
GPNAM[2]       SINE.100
GPNAM[3]       SINE.100
GPNAM[4]       SINE.100
GPNAM[5]       SINE.100
GPNAM[6]       SINE.100
GPZ1           50.00 %
GPZ2           30.00 %
  
```

Macrocyclic Product **S4c**

```

Current Data Parameters
NAME      KL-5-105-4
EXPNO    2
PROCNO   1

F2 - Acquisition Parameters
Date_    20121220
Time     18.42
INSTRUM  av500
PROBHD   5 mm DCH 13C-1
PULPROG  zg
TD        65536
SOLVENT  DMSO
NS        128
DS        0
SWH       10000.000 Hz
FIDRES   0.152588 Hz
AQ        3.2767999 sec
RG        7
DW        50.000 usec
DE        10.00 usec
TE        298.0 K
D1        2.00000000 sec
TD0       1
    
```

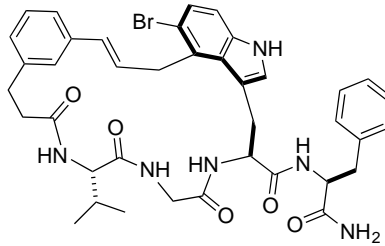

```

===== CHANNEL f1 =====
SFO1    500.1330008 MHz
NUC1     1H
P1       10.00 usec
PLW1    13.50000000 W

F2 - Processing parameters
SI        65536
SF        500.1300146 MHz
WDW       EM
SSB       0
LB        0.30 Hz
GB        0
PC        1.00
    
```

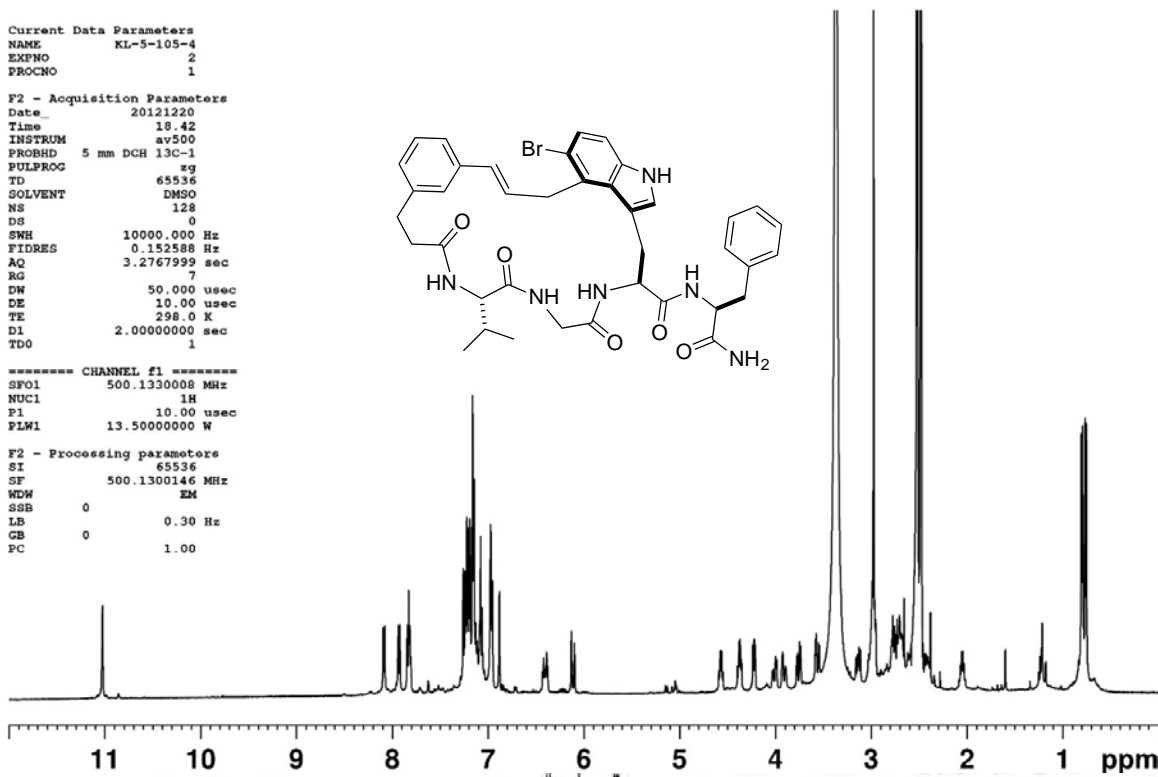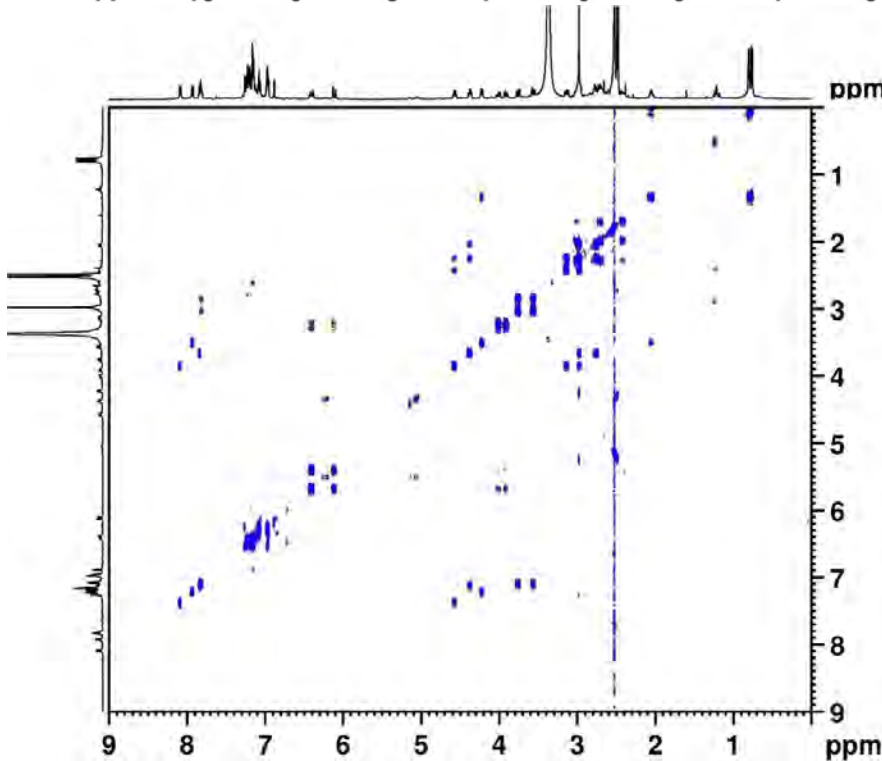

```

Current Data Parameters
NAME      KL-5-105-4
EXPNO    3
PROCNO   1

F2 - Acquisition Parameters
Date_    20121220
Time     18.42
INSTRUM  av500
PROBHD   5 mm DCH 13C-1
PULPROG  coesyppmcp
TD        4096
SOLVENT  DMSO
NS        4
DS        8
SWH       5498.534 Hz
FIDRES   1.342415 Hz
AQ        0.3724629 sec
RG        202.91
DW        90.933 usec
DE        10.00 usec
TE        298.0 K
D0        0.00007817 sec
D1        2.00000000 sec
D13       0.00000400 sec
D16       0.00020000 sec
IN0       0.00018180 sec

===== CHANNEL f1 =====
SFO1    500.1327507 MHz
NUC1     1H
P1       10.00 usec
P2       20.00 usec
PLW1    13.50000000 W

===== GRADIENT CHANNEL =====
GPNAM[1]  SMCQ10.100
GPNAM[2]  SMCQ10.100
GPE1     10.00 %
GPE2     20.00 %
P16      1000.00 usec

F1 - Acquisition parameters
TD        256
SFO1     500.1328 MHz
FIDRES   21.486525 Hz
SW        10.998 ppm
F1MODE   States-TPPI

F2 - Processing parameters
SI        4096
SF        500.1300135 MHz
WDW       SINE
SSB       1
    
```

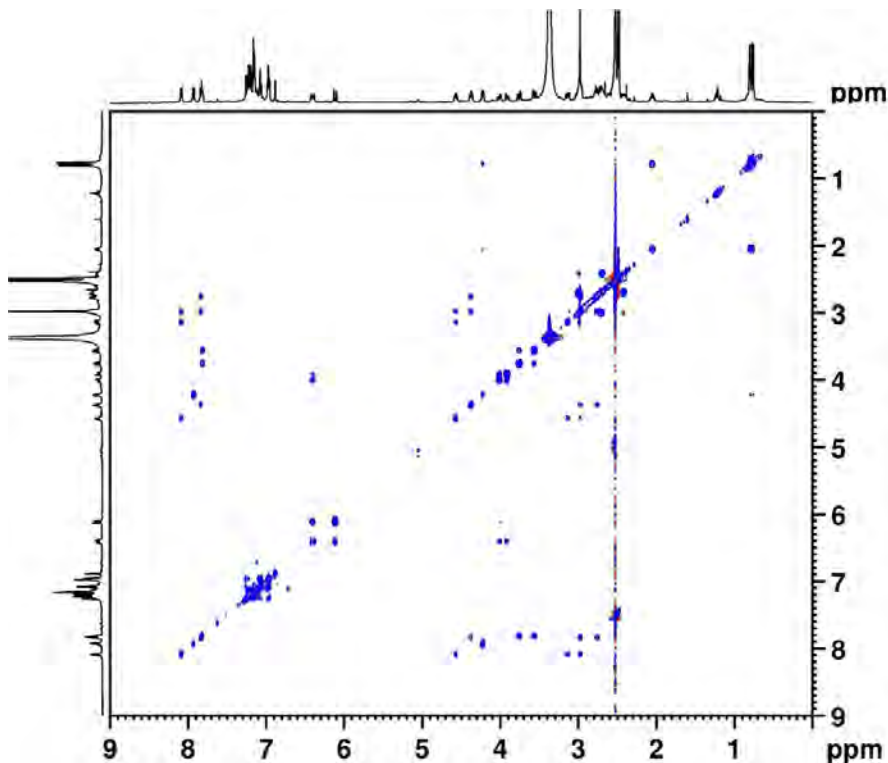

```

Current Data Parameters
NAME      KL-5-105-4
EXPNO    4
PROCNO   1

F2 - Acquisition Parameters
Date_    20121220
Time     19 23
INSTRUM  av500
PROBHD   5 mm DCH 13C-1
PULPROG  mlevetgp.je
TD       2048
SOLVENT  DMSO
NS       4
DS       8
SWH      5000.000 Hz
FIDRES   2.441406 Hz
AQ       0.2048000 sec
RG       37.94
DW       100.000 usec
DE       10.00 usec
TE       298.0 K
D0       0.00000300 sec
D1       2.00000000 sec
D9       0.06000000 sec
D11      0.03000000 sec
D12      0.00020000 sec
D16      0.00020000 sec
IN0      0.00020000 sec
L1       24
  
```

```

***** CHANNEL f1 *****
SFO1    500.1325007 MHz
NUC1     1H
P1       10.00 usec
P2       20.00 usec
P5       26.68 usec
P6       40.00 usec
P7       80.00 usec
P17      2500.00 usec
PLW1     13.50000000 W
PLW10    0.84375000 W
  
```

```

***** GRADIENT CHANNEL *****
GPMAM[1] SINE.100
GPMAM[2] SINE.100
GPE1     30.00 %
GPE2     30.00 %
PL6      1000.00 usec
  
```

```

F1 - Acquisition parameters
TD       256
SFO1     500.1325 MHz
FIDRES   19.531250 Hz
  
```

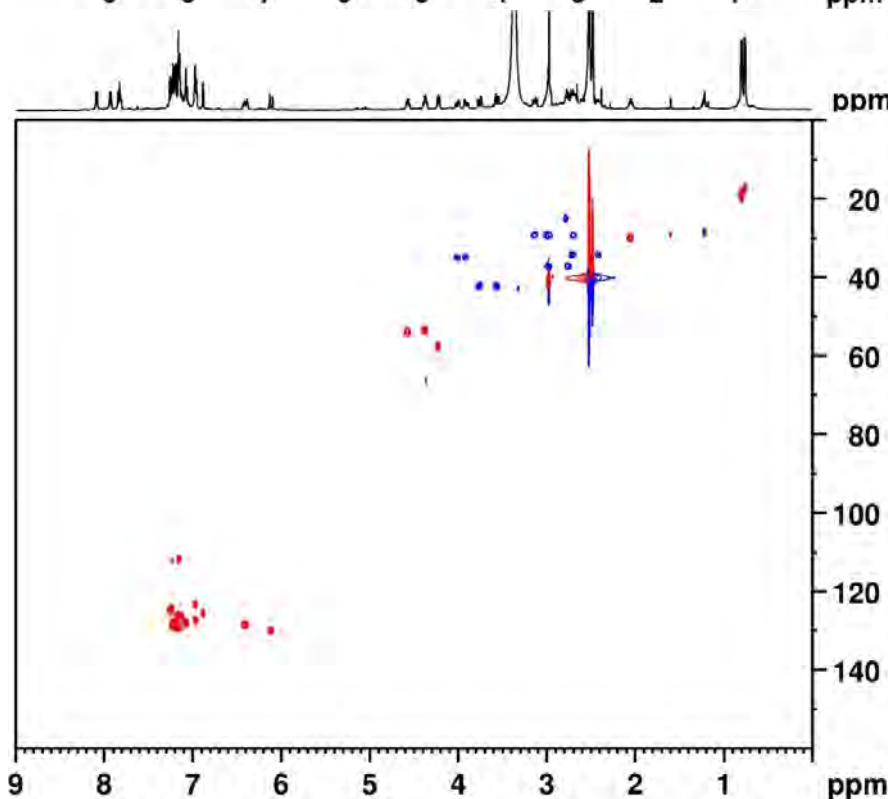

```

Current Data Parameters
NAME      KL-5-105-4
EXPNO    5
PROCNO   1

F2 - Acquisition Parameters
Date_    20121220
Time     20 04
INSTRUM  av500
PROBHD   5 mm DCH 13C-1
PULPROG  hsgqdetgpc
TD       2048
SOLVENT  DMSO
NS       16
DS       16
SWH      5000.000 Hz
FIDRES   2.441406 Hz
AQ       0.2048000 sec
RG       202.91
DW       100.000 usec
DE       10.00 usec
TE       298.0 K
CNST2    145.0000000
D0       0.00000300 sec
D1       1.50000000 sec
D4       0.00172414 sec
D11      0.03000000 sec
D13      0.00000400 sec
D16      0.00020000 sec
D21      0.00345000 sec
IN0      0.0001990 sec
ZGPTNS
  
```

```

***** CHANNEL f1 *****
SFO1    500.1325007 MHz
NUC1     1H
P1       10.00 usec
P2       20.00 usec
P28      0 usec
PLW1     13.50000000 W
  
```

```

***** CHANNEL f2 *****
SFO2    125.7678496 MHz
NUC2     13C
CPDPRG[2] garp
P3       9.63 usec
P4       19.26 usec
PCPD2    70.00 usec
PLM2     23.01399994 W
PLW12    0.43557000 W
  
```

```

***** GRADIENT CHANNEL *****
GPMAM[1] SMSQ10.100
GPMAM[2] SMSQ10.100
GPE1     80.00 %
  
```

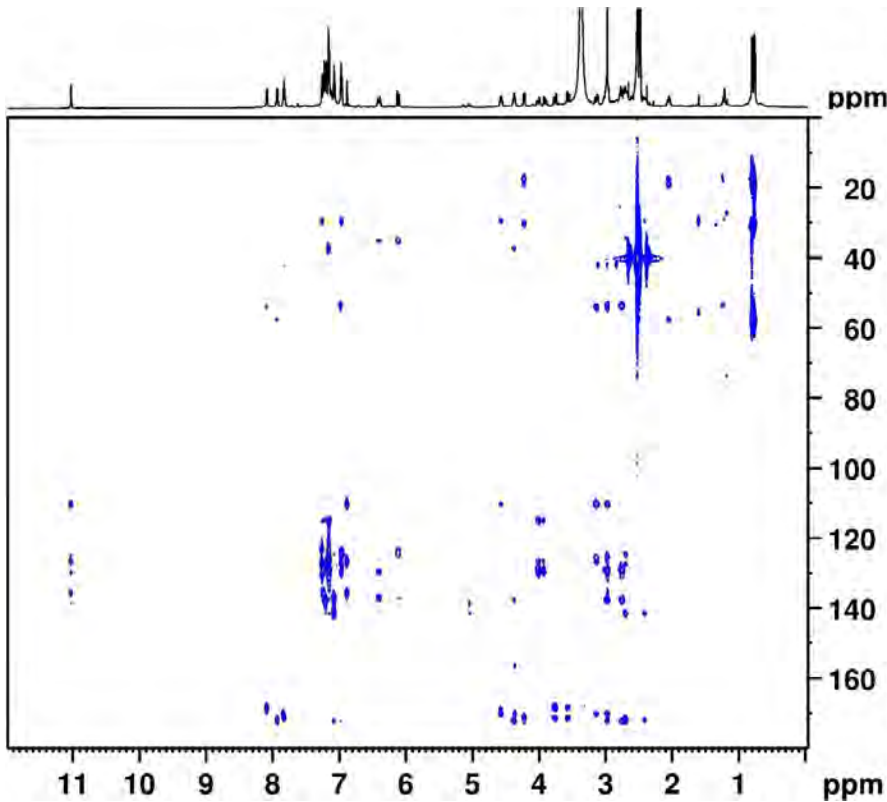

```

Current Data Parameters
NAME          KL-5-105-4
EXPNO         6
PROCNO        1

F2 - Acquisition Parameters
Date_         20121220
Time          22.03
INSTRUM       av500
PROBHD        5 mm DCH 13C-1
PULPROG       hmcgpp12ndqf
TD            2048
SOLVENT       DMSO
NS            32
DS            16
SWH           6009.615 Hz
FIDRES        2.934382 Hz
AQ            0.1703936 sec
RG            202.91
DW            83.200 usec
DE            10.00 usec
TE            298.0 K
CNST6         120.0000000
CNST7         160.0000000
CNST13        7.0000000
D0            0.00000200 sec
D1            1.50000000 sec
D6            0.07142857 sec
D16           0.00020000 sec
IN0           0.00001990 sec

===== CHANNEL f1 =====
SFO1          500.1330008 MHz
NUC1          1H
P1            10.00 usec
P2            20.00 usec
PLW1          13.50000000 W

===== CHANNEL f2 =====
SFO2          125.7703648 MHz
NUC2          13C
P3            9.63 usec
PLW2          23.01399994 W

===== GRADIENT CHANNEL =====
GPNAM[1]      SMSQ10.100
GPNAM[2]      SMSQ10.100
GPNAM[3]      SMSQ10.100
GPNAM[4]      SMSQ10.100
GPNAM[5]      SMSQ10.100
GPNAM[6]      SMSQ10.100
GPZ1          50.00 %
GPZ2          30.00 %
GPZ3          40.10 %
GPZ4          15.00 %

```



Macrocyclic Product **S4d**

Current Data Parameters  
 NAME KL-5-105-6-1  
 EXPNO 2  
 PROCNO 1

F2 - Acquisition Parameters  
 Date\_ 20130119  
 Time 18.20  
 INSTRUM av500  
 PROBHD 5 mm DCH 13C-1  
 PULPROG zg  
 TD 6556  
 SOLVENT DMSO  
 NS 8  
 DS 0  
 SWH 10000.000 Hz  
 FIDRES 0.152588 Hz  
 AQ 3.2767999 sec  
 RG 6.35  
 DW 50.000 usec  
 DE 10.00 usec  
 TE 298.0 K  
 D1 2.00000000 sec  
 TD0 1

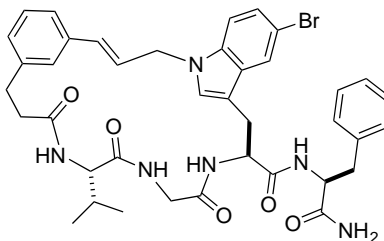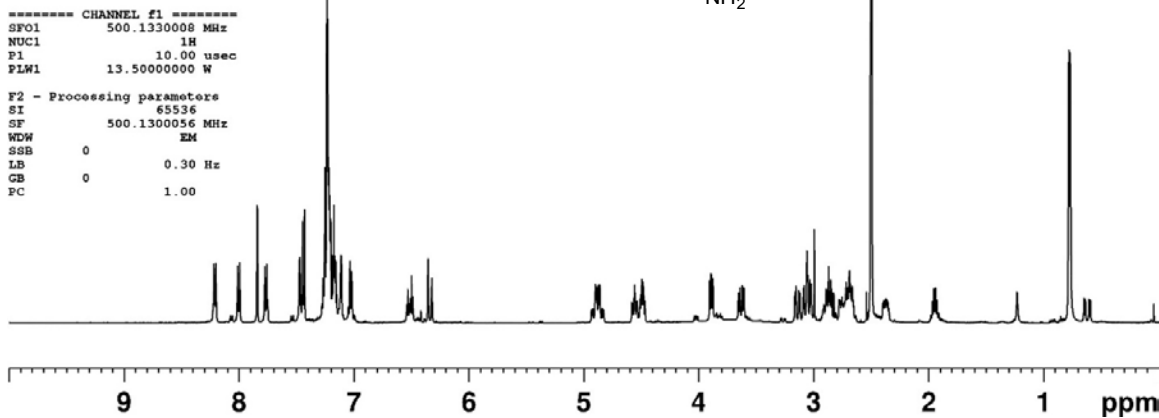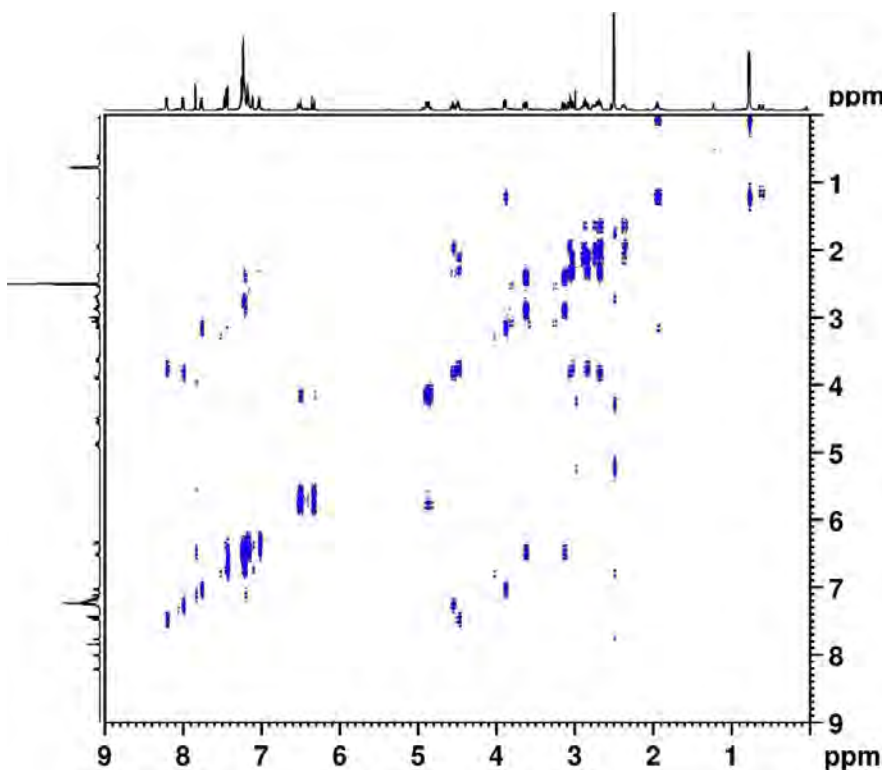

Current Data Parameters  
 NAME KL-5-105-6-1  
 EXPNO 3  
 PROCNO 1

F2 - Acquisition Parameters  
 Date\_ 20130119  
 Time 18.21  
 INSTRUM av500  
 PROBHD 5 mm DCH 13C-1  
 PULPROG cosygpmph  
 TD 4096  
 SOLVENT DMSO  
 NS 2  
 DS 2  
 SWH 5498.534 Hz  
 FIDRES 1.342415 Hz  
 AQ 0.3724629 sec  
 RG 202.91  
 DW 90.933 usec  
 DE 10.00 usec  
 TE 298.0 K  
 D0 0.00007880 sec  
 D1 2.00000000 sec  
 D13 0.00000400 sec  
 D16 0.00020000 sec  
 INO 0.00018180 sec

===== CHANNEL f1 =====  
 SF01 500.1327507 MHz  
 NUC1 1H  
 P1 9.50 usec  
 P2 19.00 usec  
 PLW1 13.50000000 W

===== GRADIENT CHANNEL =====  
 GENAM[1] SMSQ10.100  
 GENAM[2] SMSQ10.100  
 GPZ1 10.00 usec  
 GPZ2 20.00 usec  
 P16 1000.00 usec

F1 - Acquisition parameters  
 TD 256  
 SF01 500.1328 MHz  
 FIDRES 21.486525 Hz  
 SW 10.998 ppm  
 ENMODE States-TPPI

F2 - Processing parameters  
 SI 2048  
 SF 500.1300135 MHz  
 WDW SINE  
 SSB 1

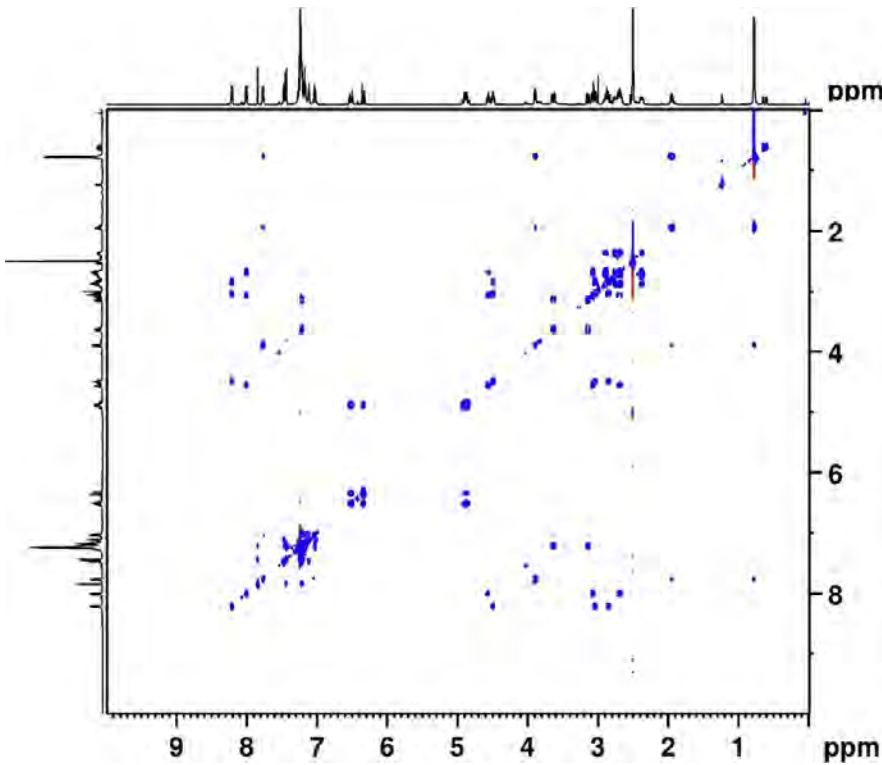

```

Current Data Parameters
NAME      KL-5-105-6-1
EXPNO    4
PROCNO   1

F2 - Acquisition Parameters
Date_    20130119
Time     18.42
INSTRUM  av500
PROBHD   5 mm DCH 13c-1
PULPROG  mlevetgp.je
TD       2048
SOLVENT  DMSO
NS       2
DS       8
SWH      5000.000 Hz
FIDRES   2.441406 Hz
AQ       0.2048000 sec
RG       37.94
DW       100.000 usec
DE       10.00 usec
TE       298.0 K
D0       0.0000300 sec
D1       2.0000000 sec
D9       0.0600000 sec
D11      0.0300000 sec
D12      0.0002000 sec
D16      0.0002000 sec
IN0      0.0002000 sec
L1       24

===== CHANNEL f1 =====
SF01     500.1325007 MHz
NUC1     1H
P1       9.50 usec
F2       19.00 usec
P5       26.68 usec
P6       40.00 usec
P7       80.00 usec
P17      2500.00 usec
PLW1     13.50000000 W
PLM10    0.84375000 W

===== GRADIENT CHANNEL =====
GPNAM[1] SINE.100
GPNAM[2] SINE.100
GPE1     30.00 %
GPE2     30.00 %
PL6      1000.00 usec

F1 - Acquisition parameters
TD       256
SF01     500.1325 MHz
FIDRES   19.531250 Hz
  
```

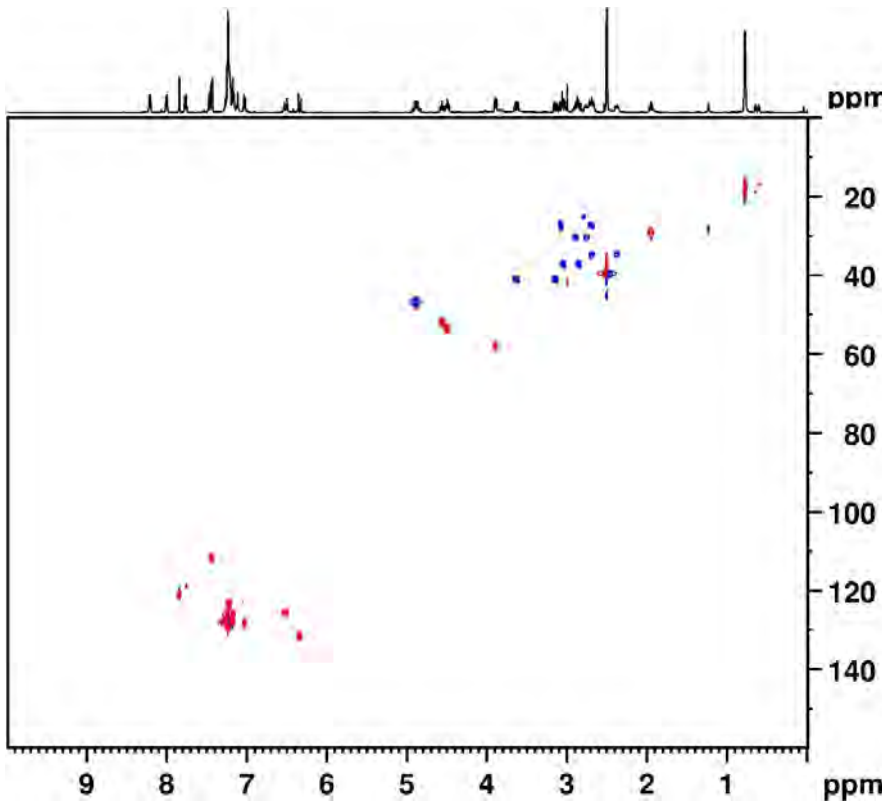

```

Current Data Parameters
NAME      KL-5-105-6-1
EXPNO    5
PROCNO   1

F2 - Acquisition Parameters
Date_    20130119
Time     19.02
INSTRUM  av500
PROBHD   5 mm DCH 13c-1
PULPROG  hsqcedetgp
TD       2048
SOLVENT  DMSO
NS       2
DS       16
SWH      5000.000 Hz
FIDRES   2.441406 Hz
AQ       0.2048000 sec
RG       202.91
DW       100.000 usec
DE       10.00 usec
TE       298.0 K
CMST2    145.0000000 sec
D0       0.0000300 sec
D1       1.5000000 sec
D4       0.00172414 sec
D11      0.0300000 sec
D13      0.0000400 sec
D16      0.0002000 sec
D21      0.00345000 sec
IN0      0.00001990 sec
ZGOPTNS

===== CHANNEL f1 =====
SF01     500.1325007 MHz
NUC1     1H
P1       9.50 usec
P2       19.00 usec
P2B      0 usec
PLW1     13.50000000 W

===== CHANNEL f2 =====
SF02     125.7678496 MHz
NUC2     13C
CPDPRG[2] gskp
P3       9.63 usec
P4       19.26 usec
PCPD2    70.00 usec
PLW2     22.01399994 W
PLM12    0.43557000 W

===== GRADIENT CHANNEL =====
GPNAM[1] SMSQ10.100
GPNAM[2] SMSQ10.100
GPE1     80.00 %
  
```

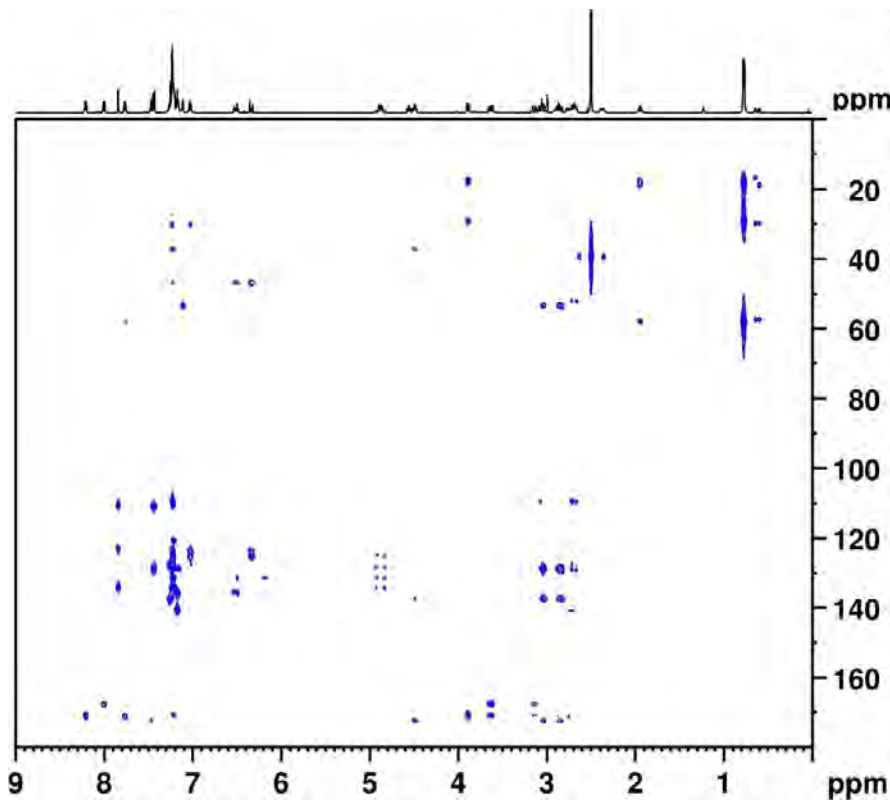

```

Current Data Parameters
NAME      KL-5-105-6-1
EXPNO    6
PROCNO   1

F2 - Acquisition Parameters
Date_    20130122
Time     18.05
INSTRUM  av500
PROBHD   5 mm DCH 13C-1
PULPROG  hmbcgp12ndqf
TD        2048
SOLVENT  DMSO
NS        6
DS        16
SWH       6009.615 Hz
FIDRES   2.934382 Hz
AQ        0.1703936 sec
RG        202.91
DW        83.200 usec
DE        10.00 usec
TE        298.0 K
CNS26    120.0000000
CNS27    160.0000000
CNS213   7.0000000
D0        0.00000300 sec
D1        1.50000000 sec
D6        0.07142857 sec
D16       0.00020000 sec
IN0       0.00001990 sec

===== CHANNEL f1 =====
SFO1      500.1330008 MHz
NUC1       1H
P1         9.50 usec
P2        19.00 usec
PLW1      13.50000000 W

===== CHANNEL f2 =====
SFO2      125.7703648 MHz
NUC2       13C
P3         9.63 usec
PLW2      23.01399994 W

===== GRADIENT CHANNEL =====
GPNAM[1]  SMSQ10.100
GPNAM[2]  SMSQ10.100
GPNAM[3]  SMSQ10.100
GPNAM[4]  SMSQ10.100
GPNAM[5]  SMSQ10.100
GPNAM[6]  SMSQ10.100
GP21      50.00 %
GP22      30.00 %
GP23      40.10 %
GP24      15.00 %

```

*N*-acetyl-L-tryptophan isopropyl amide **S7**

```
Current Data Parameters
NAME TR6-168
EXPNO 510
PROCNO 1

F2 - Acquisition Parameters
Date_ 20160113
Time 18.10
INSTRUM av400
PROBHD 5 mm PABBO BB/
PULPROG zg30
TD 52882
SOLVENT CDCL3
NS 8
DS 0
SWH 8012.820 Hz
FIDRES 0.151523 Hz
AQ 3.2998369 sec
RG 155.85
DW 62.400 usec
DE 6.50 usec
TE 299.0 K
D1 2.00000000 sec
TD0 1

===== CHANNEL f1 =====
SFO1 400.1324008 MHz
NUC1 1H
P1 15.00 usec
PLW1 13.00000000 W

F2 - Processing parameters
SI 65536
SF 400.1319116 MHz
WDW EM
SSB 0
LB 0.30 Hz
GB 0
PC 1.00
```

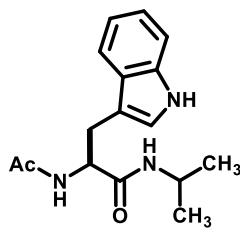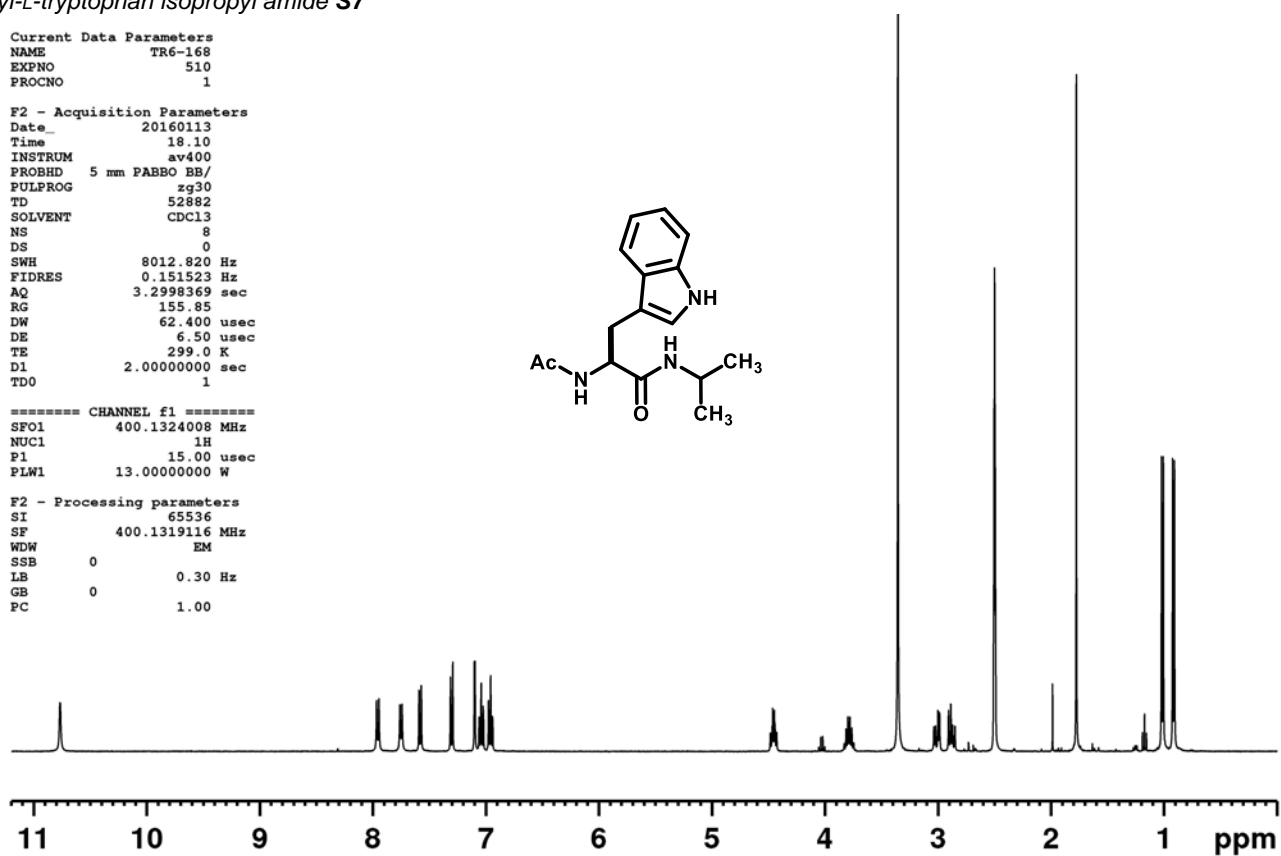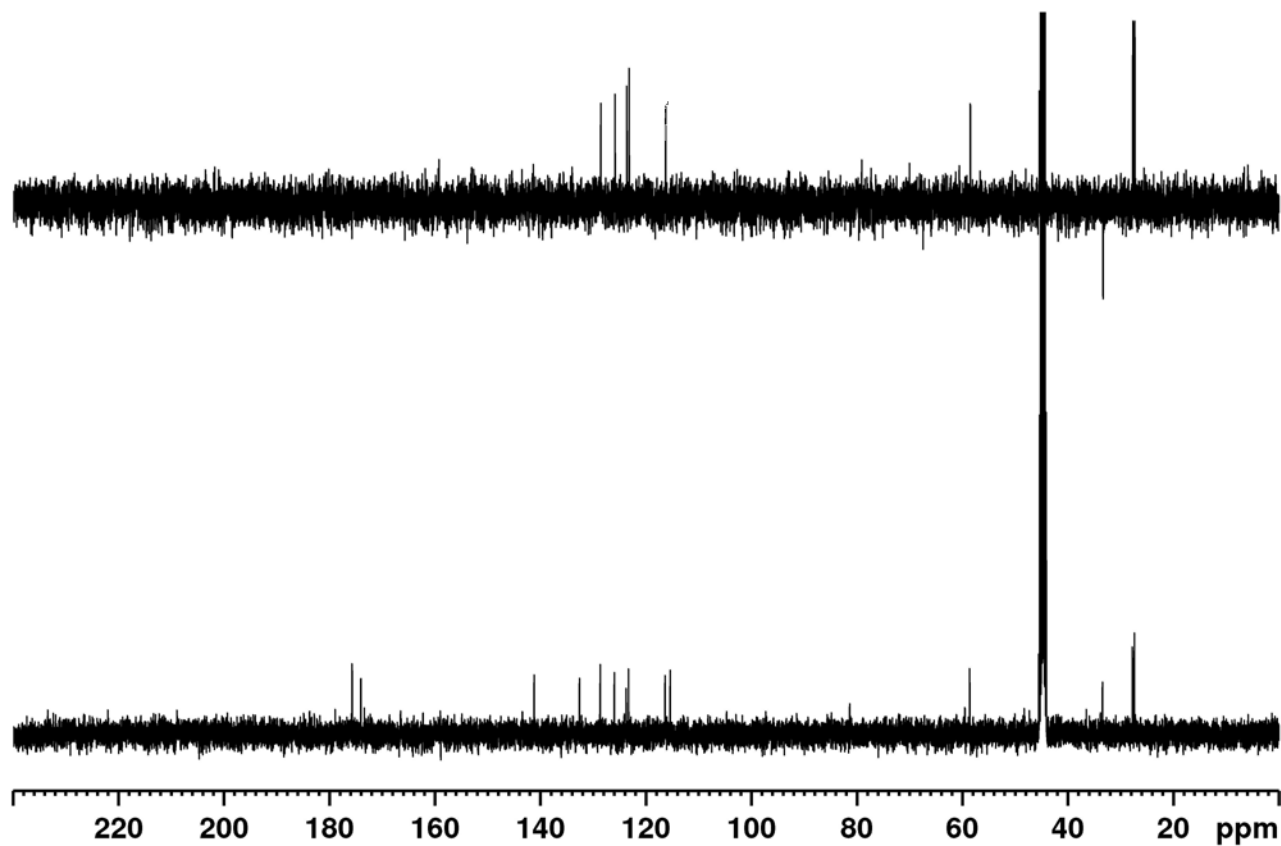

*endo*-pyrroloindoline **21a**

Current Data Parameters  
NAME TR6-169F1\_  
EXPNO 1  
PROCNO 1

F2 - Acquisition Parameters  
Date\_ 20160217  
Time 17.29  
INSTRUM drx500  
PROBHD 5 mm bb-Z Z800  
PULPROG zg30  
TD 65536  
SOLVENT CDCl3  
NS 8  
DS 0  
SWH 10000.000 Hz  
FIDRES 0.152588 Hz  
AQ 3.2767999 sec  
RG 35.9  
DW 50.000 usec  
DE 6.00 usec  
TE 296.8 K  
D1 2.00000000 sec  
TD0 1

===== CHANNEL f1 =====  
NUC1 1H  
P1 13.30 usec  
PL1 0 dB  
SFO1 500.3330020 MHz

F2 - Processing parameters  
SI 32768  
SF 500.3300220 MHz  
WDW EM  
SSB 0  
LB 0.30 Hz  
GB 0  
PC 1.00

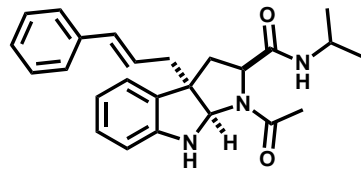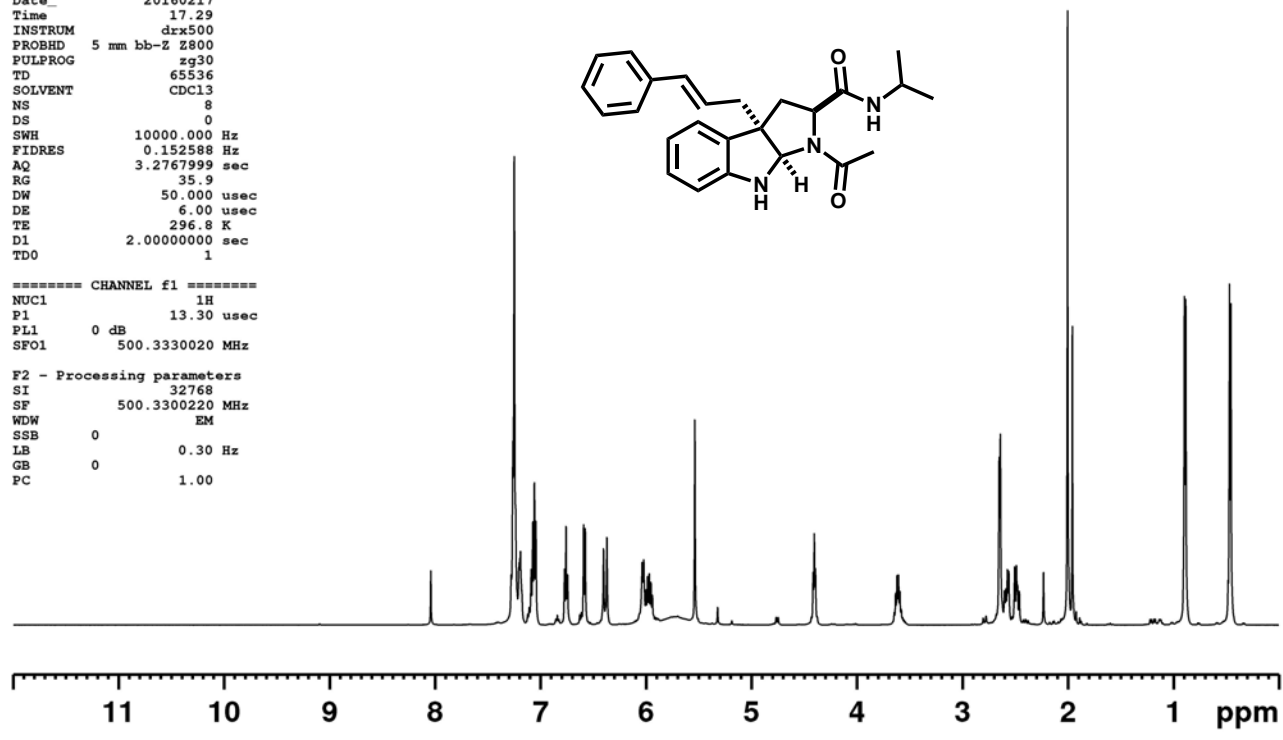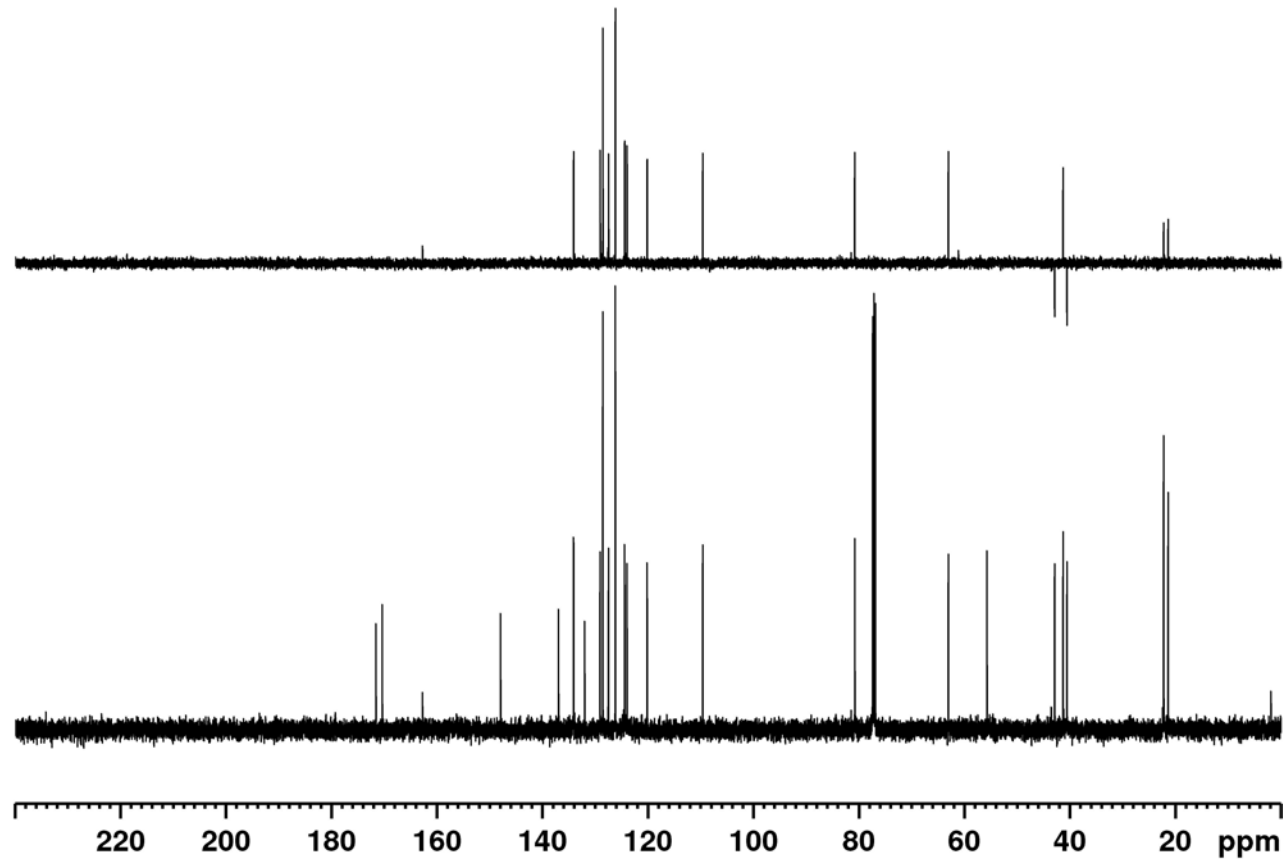

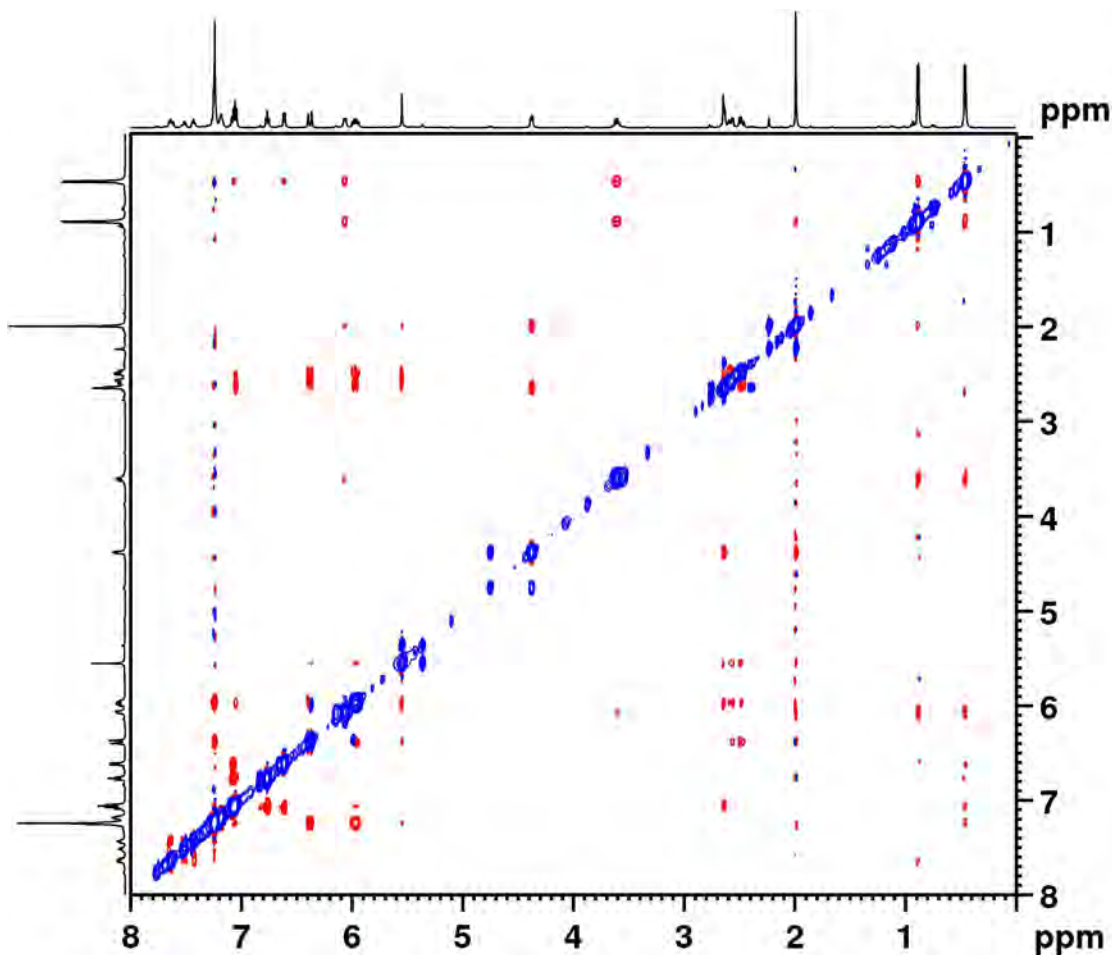

Current Data Parameters  
 NAME TR6-169F1\_NOESY  
 EXPNO 2  
 PROCNO 1

F2 - Acquisition Parameters  
 Date\_ 20160115  
 Time 10.12  
 INSTRUM drx500  
 PROBHD 5 mm bb-2 Z800  
 PULPROG noesypph  
 TD 2048  
 SOLVENT DMSO  
 NS 2  
 DS 8  
 SWH 4496.403 Hz  
 FIDRES 2.195509 Hz  
 AQ 0.2277376 sec  
 RG 22.6  
 DW 111.200 usec  
 DE 6.00 usec  
 TE 296.6 K  
 d0 0.00009384 sec  
 D1 2.00000000 sec  
 D8 0.75000000 sec  
 D16 0.00010000 sec  
 INO 0.00022205 sec  
 ST1CNT 0  
 TAU 0.37340000 sec

==== CHANNEL f1 =====  
 NUC1 1H  
 P1 13.50 usec  
 P2 27.00 usec  
 PL1 0 dB  
 SFO1 500.3322515 MHz

==== GRADIENT CHANNEL =====  
 GPNAM[1] SINE.100  
 GPNAM[2] SINE.100  
 GPZ1 40.00 %  
 GPZ2 -40.00 %  
 P16 1500.00 usec

F1 - Acquisition parameters  
 TD 128  
 SFO1 500.3323 MHz  
 FIDRES 35.183517 Hz  
 SW 9.001 ppm  
 FnMODE States-TPPI

F2 - Processing parameters  
 SI 4096  
 SF 500.3300221 MHz

*exo*-pyrroloindoline **21b**

Current Data Parameters  
NAME TR6-169F2\_  
EXPNO 1  
PROCNO 1

F2 - Acquisition Parameters  
Date\_ 20160217  
Time 18.27  
INSTRUM av600  
PROBHD 5 mm BB5  
PULPROG zg  
TD 65536  
SOLVENT CDCl3  
NS 1  
DS 0  
SWH 12376.237 Hz  
FIDRES 0.188846 Hz  
AQ 2.6476543 sec  
RG 35.9  
DW 40.400 usec  
DE 6.50 usec  
TE 296.2 K  
D1 2.00000000 sec  
TDO 1

===== CHANNEL f1 =====  
NUC1 1H  
P1 10.32 usec  
PL1 -2.00 dB  
PL1W 39.81071854 W  
SFO1 600.1336008 MHz

F2 - Processing parameters  
SI 65536  
SF 600.1300068 MHz  
WDW EM  
SSB 0  
LB 0.30 Hz  
GB 0  
PC 1.00

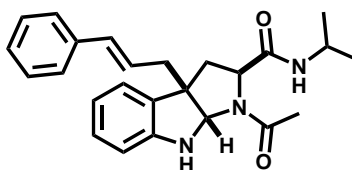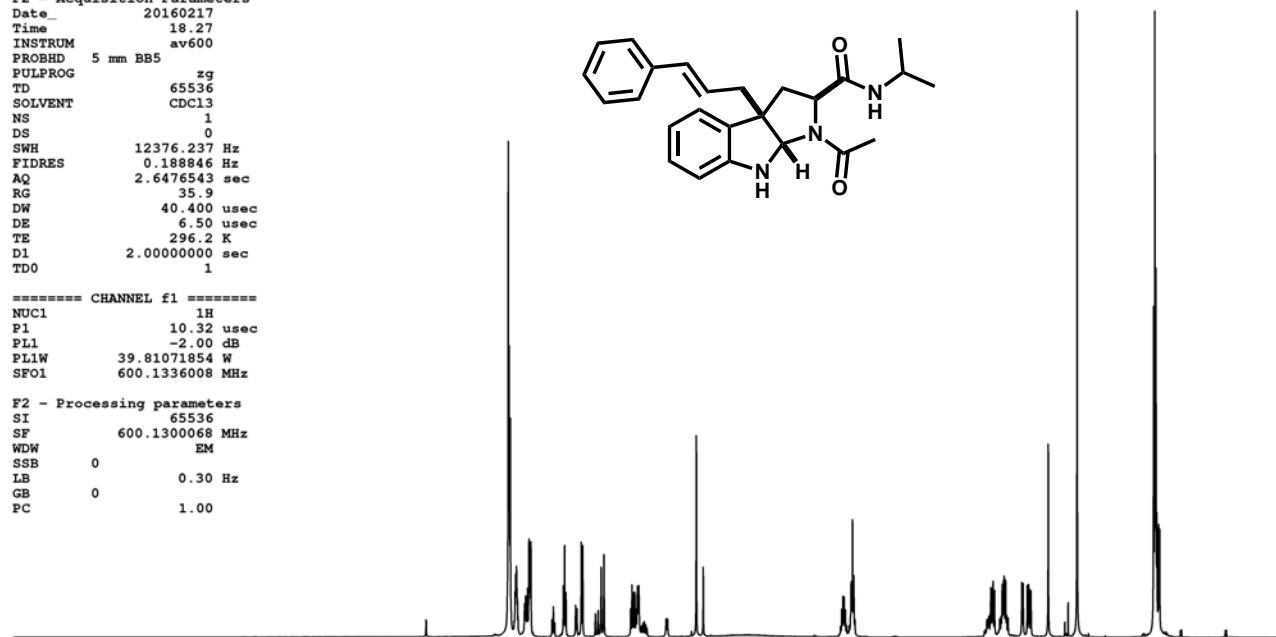

11 10 9 8 7 6 5 4 3 2 1 ppm

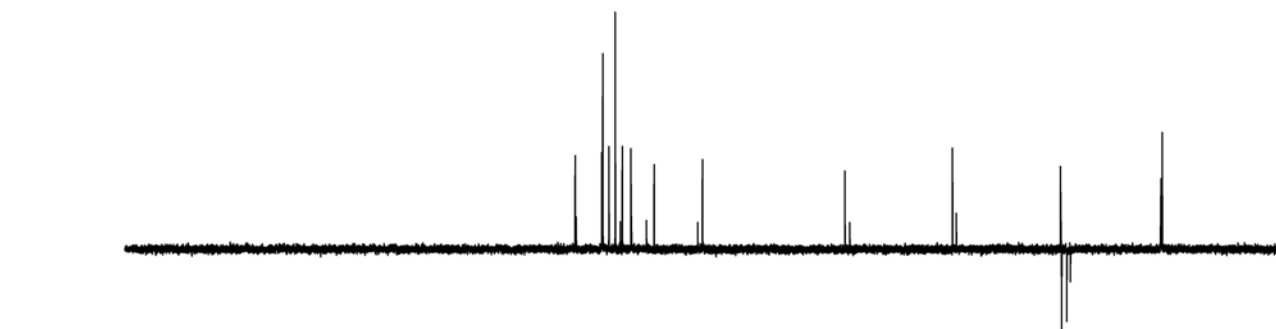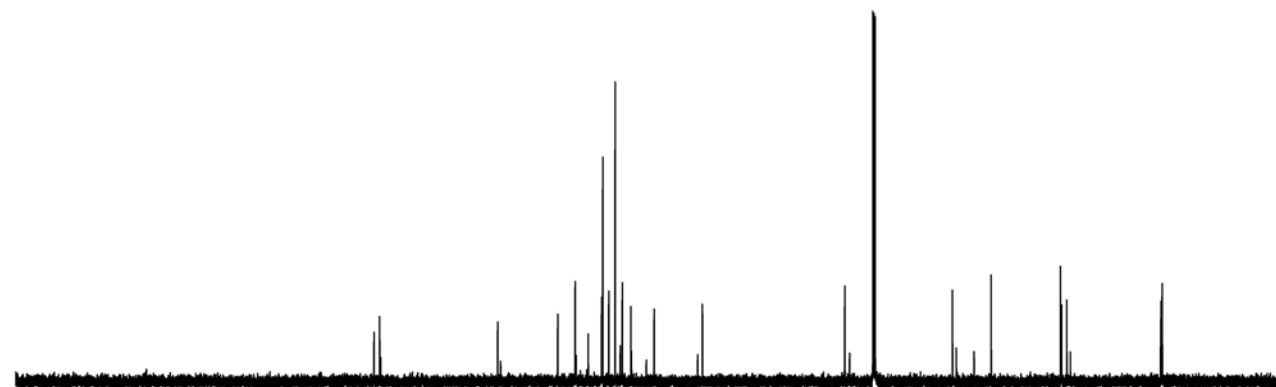

220 200 180 160 140 120 100 80 60 40 20 ppm

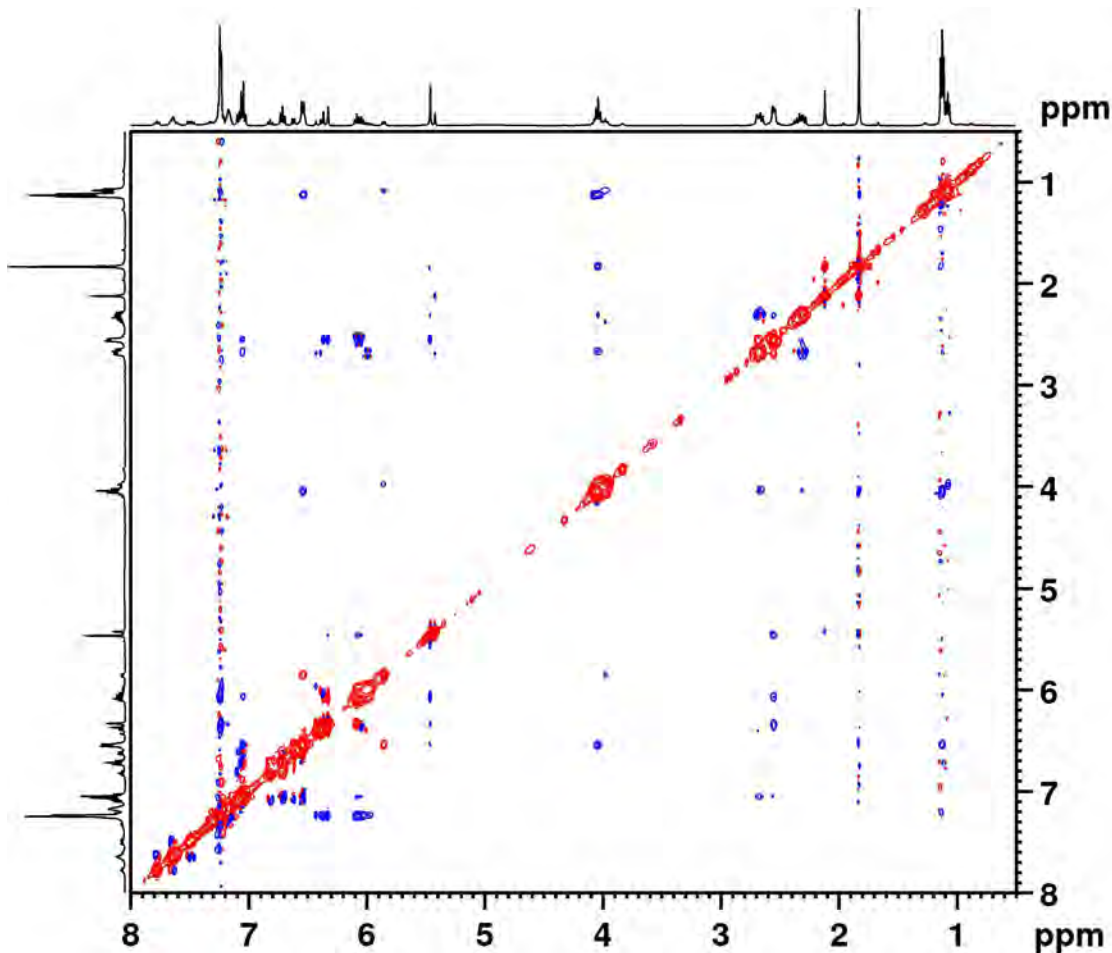

Current Data Parameters  
 NAME TR6-169F2  
 EXPNO 82  
 PROCNO 1

F2 - Acquisition Parameters  
 Date 20160115  
 Time 10.00  
 INSTRUM av400  
 PROBHD 5 mm PABBO BB/  
 PULPROG noesypphpp  
 TD 2048  
 SOLVENT CDCl3  
 NS 2  
 DS 8  
 SWH 5154.639 Hz  
 FIDRES 2.516914 Hz  
 AQ 0.1986560 sec  
 RG 7.7  
 DW 97.000 usec  
 DE 6.50 usec  
 TE 299.0 K  
 D0 0.00007790 sec  
 D1 2.00000000 sec  
 D8 0.75000000 sec  
 D11 0.03000000 sec  
 D12 0.00002000 sec  
 D16 0.00020000 sec  
 INO 0.00019400 sec

==== CHANNEL f1 =====  
 SFO1 400.1319474 MHz  
 NUC1 1H  
 P1 15.00 usec  
 P2 30.00 usec  
 P17 2500.00 usec  
 PLW1 13.00000000 W  
 PLW10 4.32690001 W

==== GRADIENT CHANNEL =====  
 GPNAM[1] SMSQ10.100  
 GPZ1 40.00 %  
 P16 1000.00 usec

F1 - Acquisition parameters  
 TD 256  
 SFO1 400.1319 MHz  
 FIDRES 20.135309 Hz  
 SW 12.882 ppm  
 FnMODE States-TFPI

F2 - Processing parameters  
 SI 4096  
 SF 400.1300184 MHz



(S)-2-acetamido-3-(2\_cinnamyl-1H-indol-3-yl)-N-isopropylpropanamide 22

Current Data Parameters  
NAME TR6-176  
EXPNO 3  
PROCNO 1

F2 - Acquisition Parameters  
Date\_ 20160125  
Time 14.29  
INSTRUM drx500  
PROBHD 5 mm bb-Z Z800  
PULPROG zg  
TD 65536  
SOLVENT CDCl3  
NS 8  
DS 0  
SWH 10000.000 Hz  
FIDRES 0.152588 Hz  
AQ 3.2767999 sec  
RG 90.5  
DW 50.000 usec  
DE 6.00 usec  
TE 296.6 K  
D1 2.0000000 sec  
TD0 1

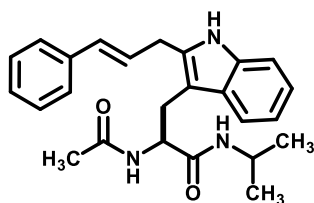

===== CHANNEL f1 =====  
NUC1 1H  
P1 13.50 usec  
PL1 0 dB  
SFO1 500.3330020 MHz

F2 - Processing parameters  
SI 32768  
SF 500.3300220 MHz  
WDW EM  
SSB 0  
LB 0.30 Hz  
GB 0  
PC 1.00

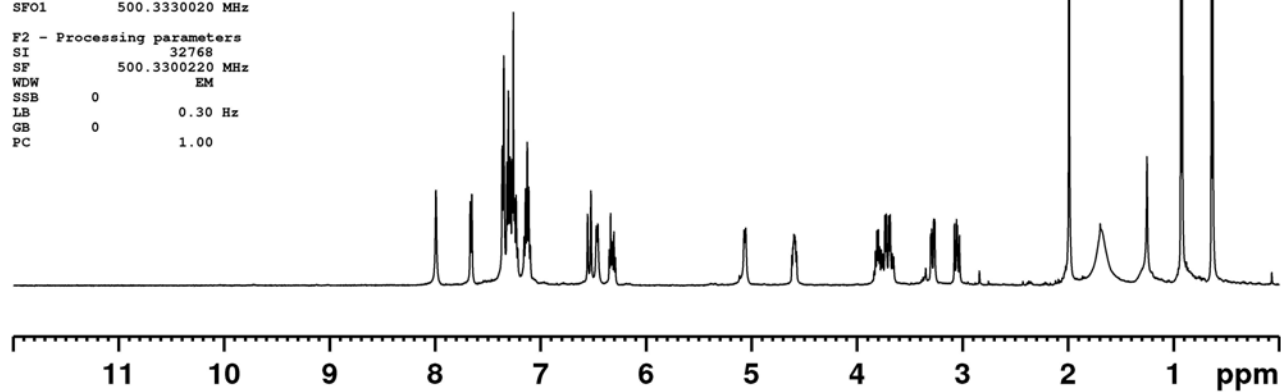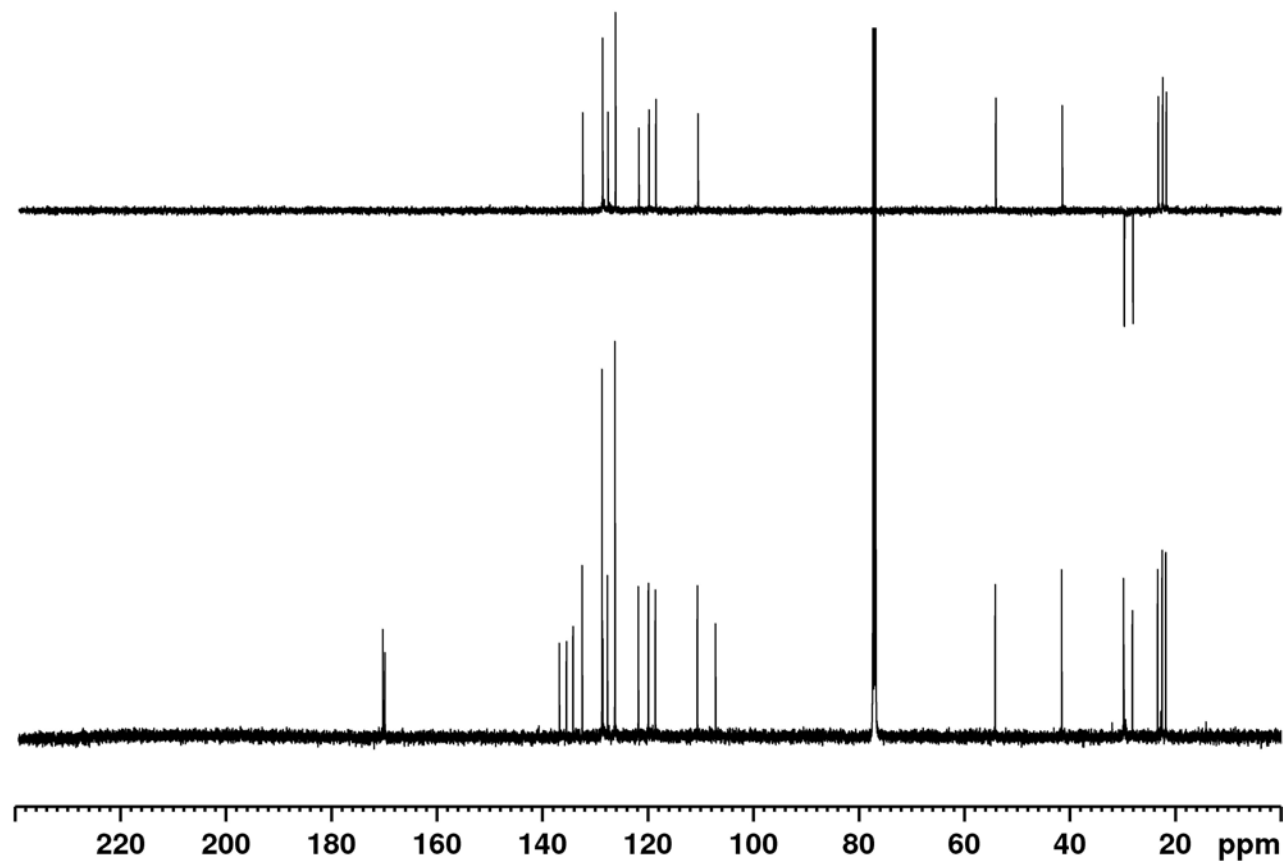

3-(3-Bromophenyl)propionic acid S5

```

Current Data Parameters
NAME          TR6-74
EXPNO         1
PROCNO        1

F2 - Acquisition Parameters
Date_         20150902
Time          18.21
INSTRUM       drx500
PROBHD        5 mm bb-Z Z800
PULPROG       zg30
TD            65536
SOLVENT       CDCl3
NS            8
DS            0
SWH           10000.000 Hz
FIDRES        0.152588 Hz
AQ            3.2767999 sec
RG            71.8
DW            50.000 usec
DE            6.00 usec
TE            297.4 K
D1            2.00000000 sec
TDO           1

===== CHANNEL f1 =====
NUC1          1H
P1            13.30 usec
PL1           0 dB
SFO1          500.3330020 MHz

F2 - Processing parameters
SI            32768
SF            500.3300220 MHz
WDW           EM
SSB           0
LB            0.30 Hz
GB            0
PC            1.00
    
```

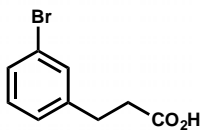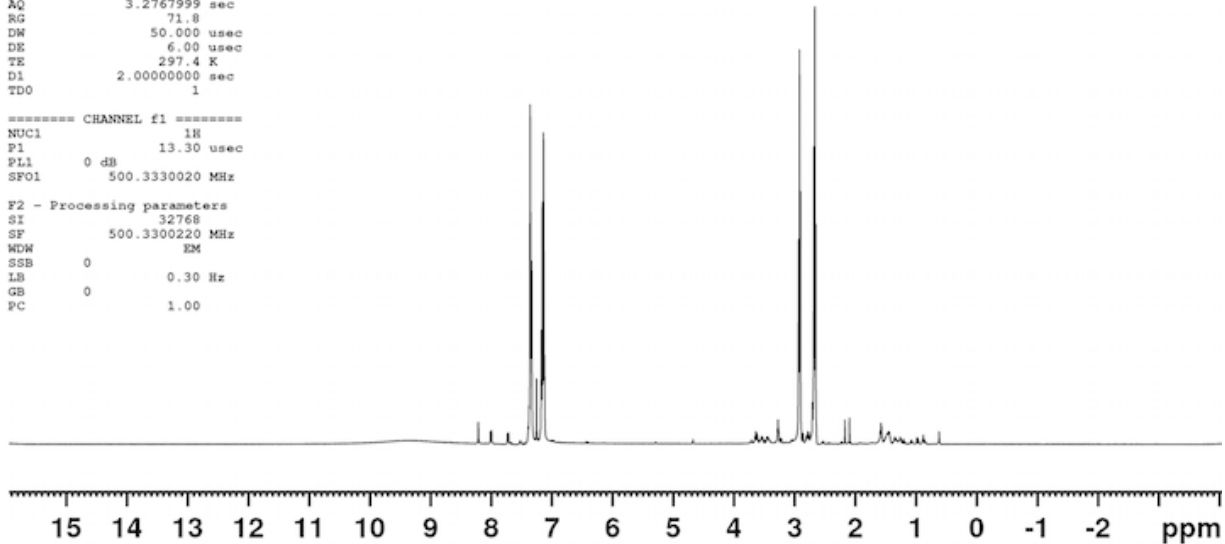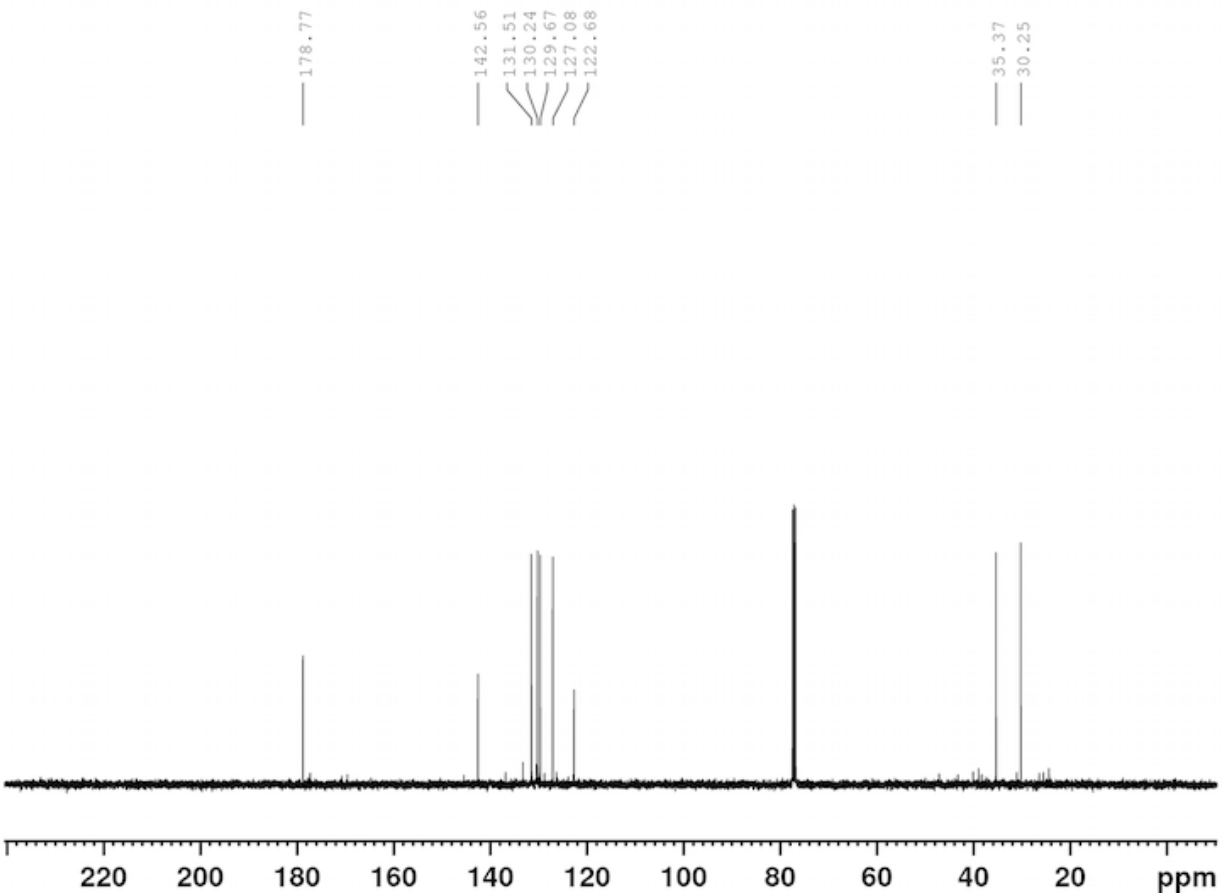

tert-Butyl 3-(3-bromophenyl)propanoate S6

Current Data Parameters  
NAME TR6-79crude  
EXPNO 170  
PROCNO 1

F2 - Acquisition Parameters  
Date\_ 20150904  
Time 14.02  
INSTRUM av400  
PROBHD 5 mm PABBO BB/  
PULPROG zg30  
TD 52882  
SOLVENT CDCl3  
NS 8  
DS 0  
SWH 8012.820 Hz  
FIDRES 0.151523 Hz  
AQ 3.2998369 sec  
RG 155.85  
DM 62.400 usec  
DE 6.50 usec  
TE 299.0 K  
D1 2.00000000 sec  
TD0 1

===== CHANNEL f1 =====  
SF01 400.1324008 MHz  
NUC1 1H  
P1 15.00 usec  
PLW1 13.00000000 W

F2 - Processing parameters  
SI 6536  
SF 400.1300184 MHz  
WDW EM  
SSB 0  
LB 0.30 Hz  
GB 0  
PC 1.00

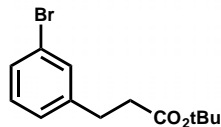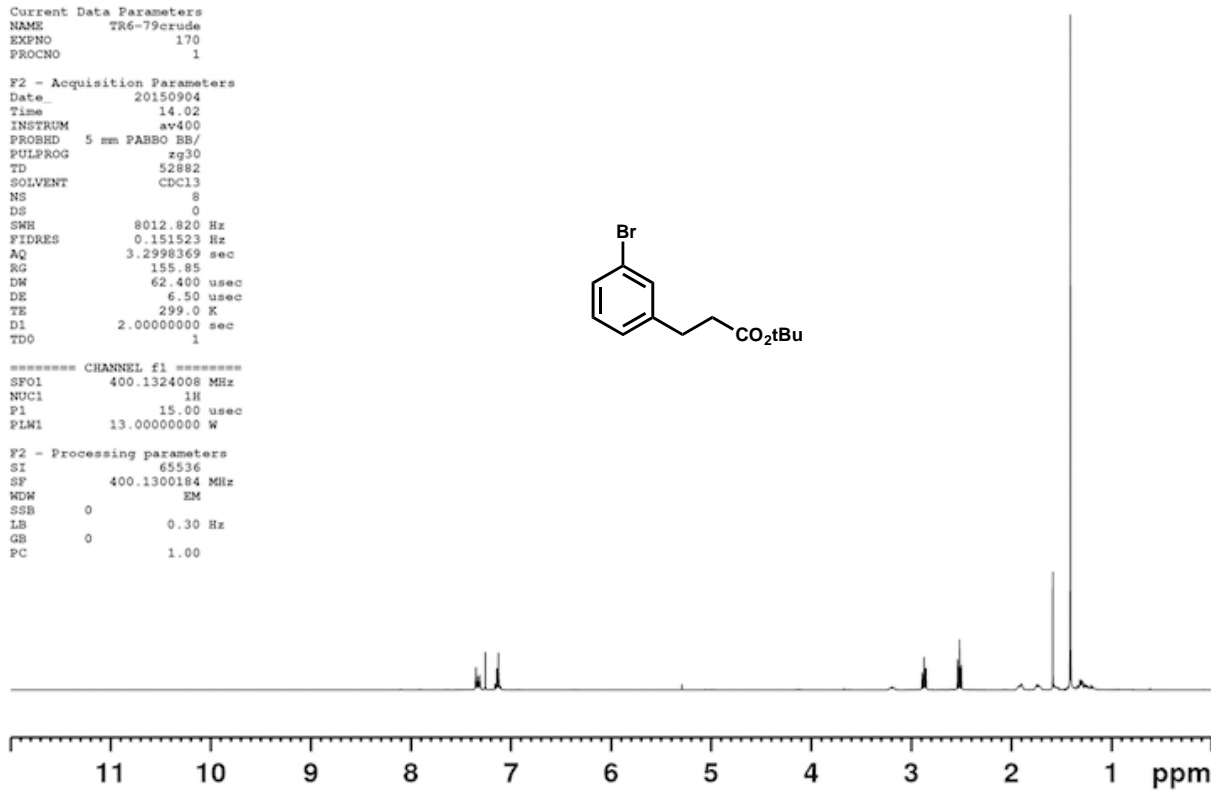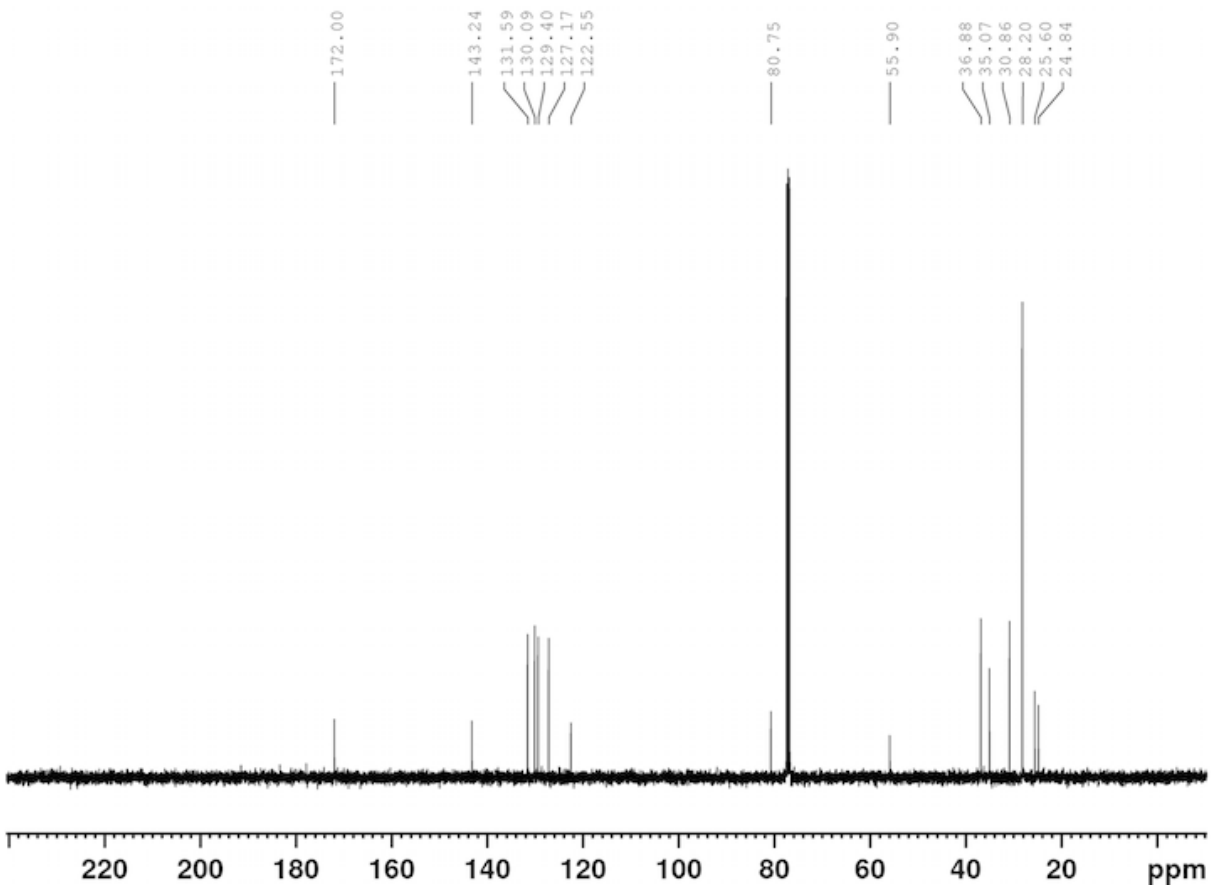

Cinnamyl Alcohol 21

Current Data Parameters  
NAME TR6-88  
EXPNO 100  
PROCNO 1

F2 - Acquisition Parameters  
Date\_ 20150911  
Time 9.55  
INSTRUM av400  
PROBHD 5 mm PABBO BB/  
PULPROG zg30  
TD 52882  
SOLVENT CDCl3  
NS 8  
DS 0  
SWH 8012.820 Hz  
FIDRES 0.151523 Hz  
AQ 3.2998369 sec  
RG 83.63  
DW 62.400 usec  
DE 6.50 usec  
TE 299.0 K  
D1 2.00000000 sec  
TDO 1

===== CHANNEL f1 =====  
SF01 400.1324008 MHz  
NUC1 1H  
P1 15.00 usec  
PLW1 13.00000000 W

F2 - Processing parameters  
SI 65536  
SF 400.1300176 MHz  
WDW EM  
SSB 0  
LB 0.30 Hz  
GB 0  
PC 1.00

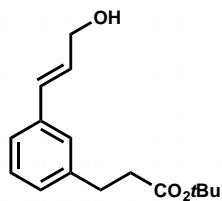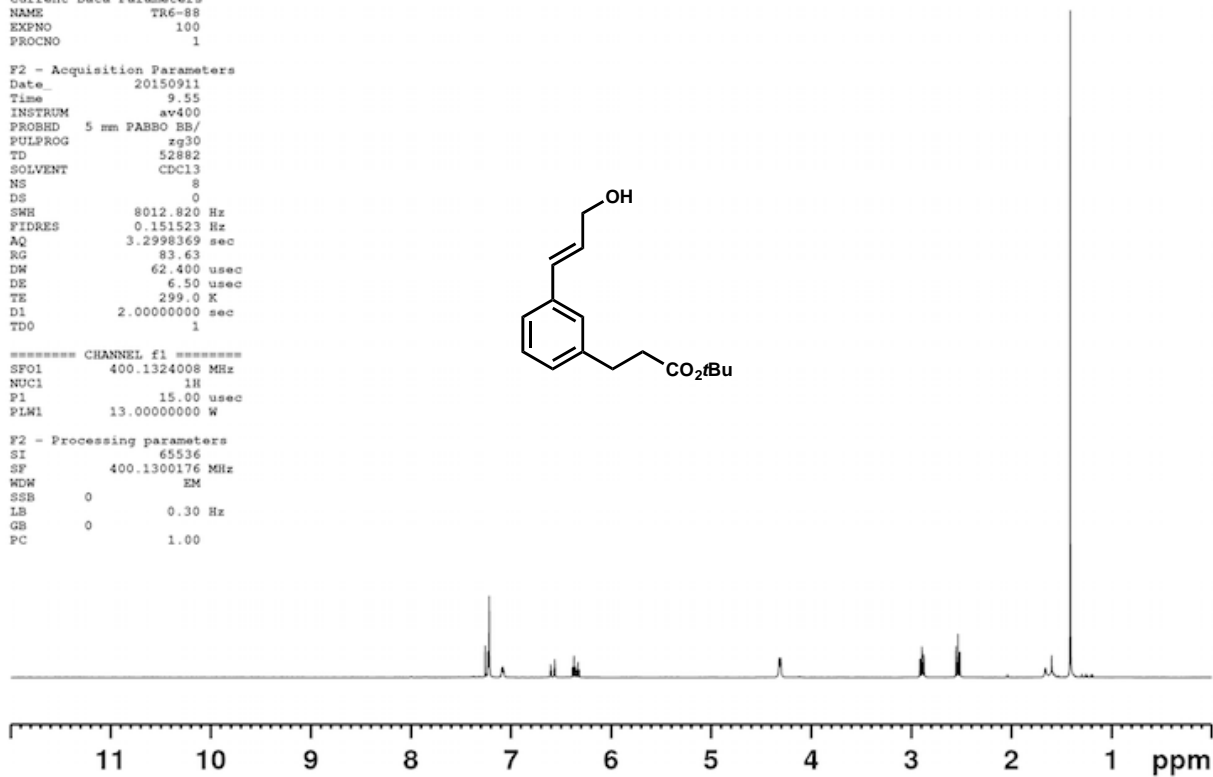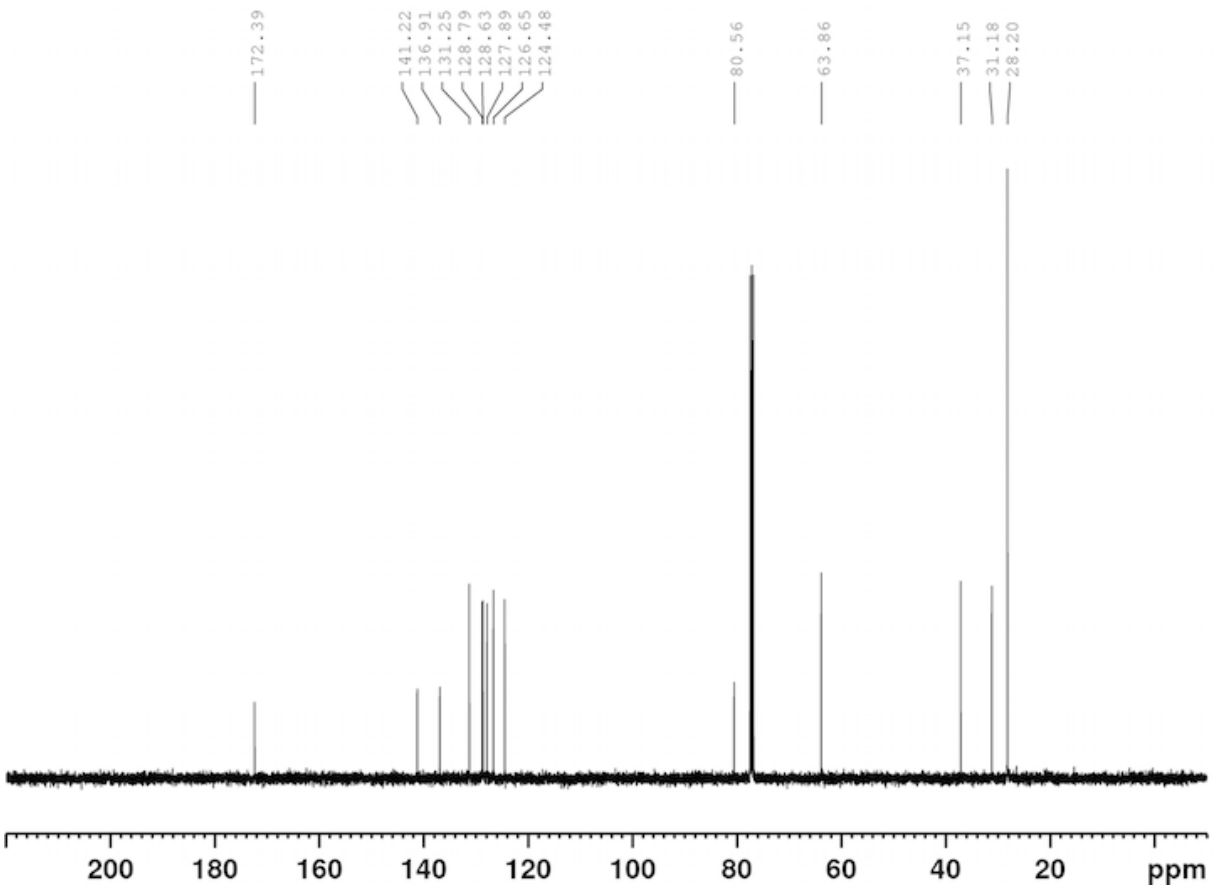

endo-Pyrroloindoline 23

```

Current Data Parameters
NAME          TR6-86
EXPNO         1
PROCNO        1

F2 - Acquisition Parameters
Date_         20150911
Time          17.00
INSTRUM       av500
PROBHD        5 mm DCH 13C-1
PULPROG       zg
TD             65536
SOLVENT       CDCl3
NS             8
DS             0
SWH           10000.000 Hz
FIDRES        0.152588 Hz
AQ            3.2767999 sec
RG            6.59
DW            50.000 usec
DE            10.00 usec
TE            298.0 K
D1            2.00000000 sec
TDO           1

===== CHANNEL f1 =====
SFO1          500.1330008 MHz
NUC1          1H
P1            9.85 usec
PLW1          13.50000000 W

F2 - Processing parameters
SI            65536
SF            500.1300000 MHz
WDW           EM
SSB           0
LB            0.30 Hz
GB            0
PC            1.00
    
```

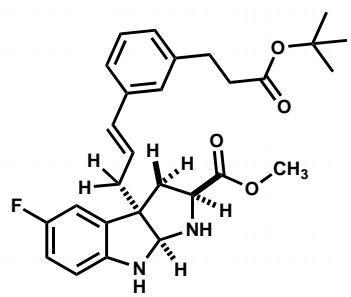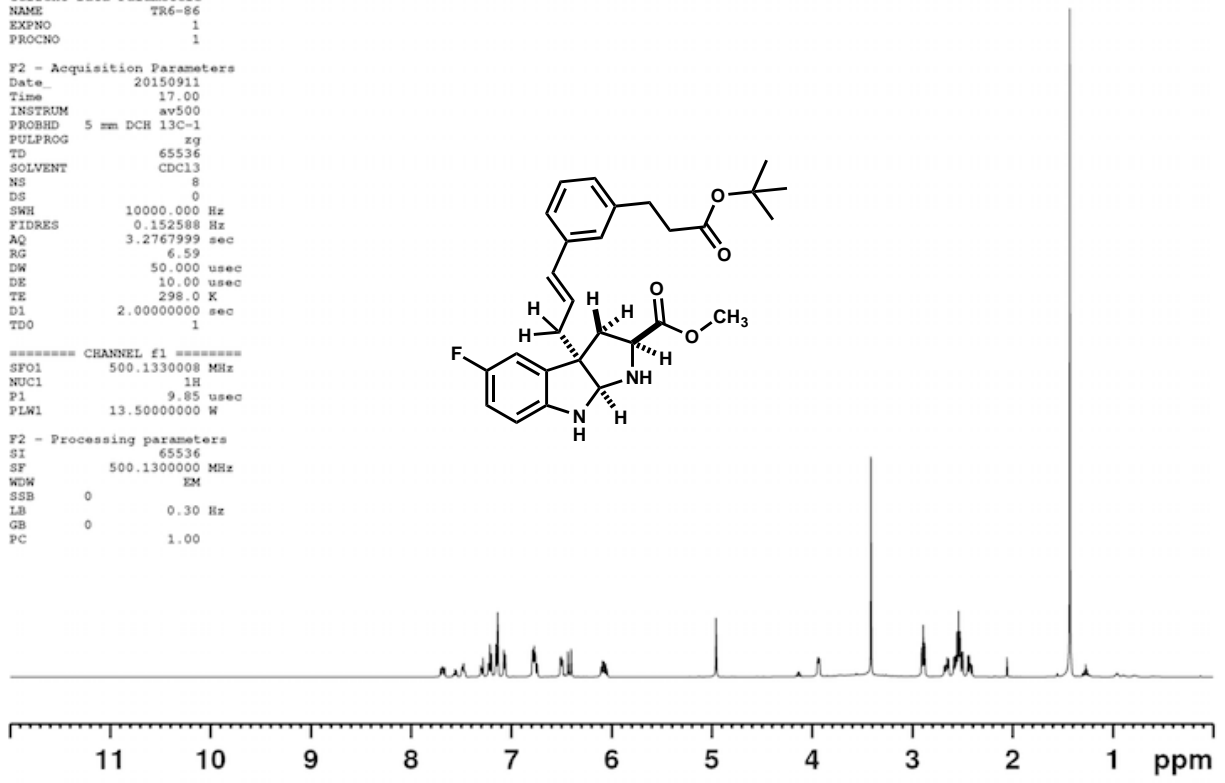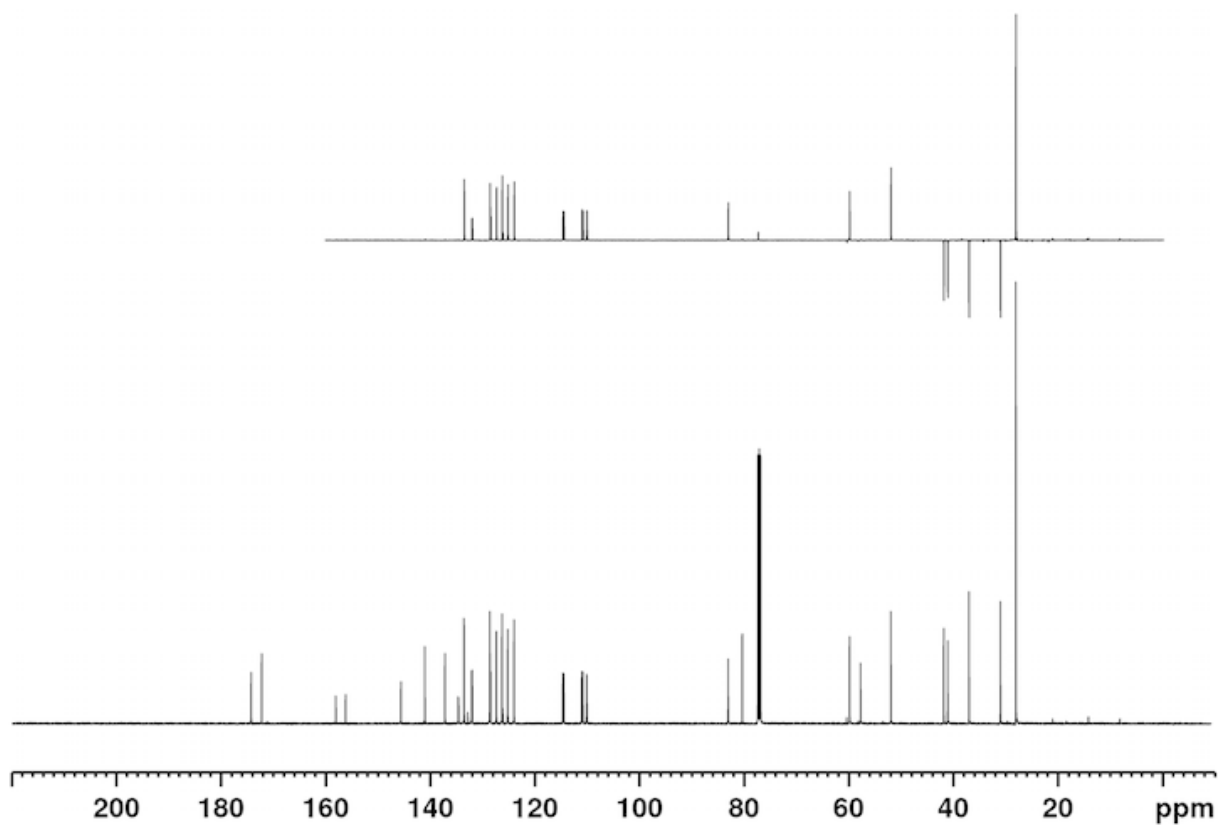

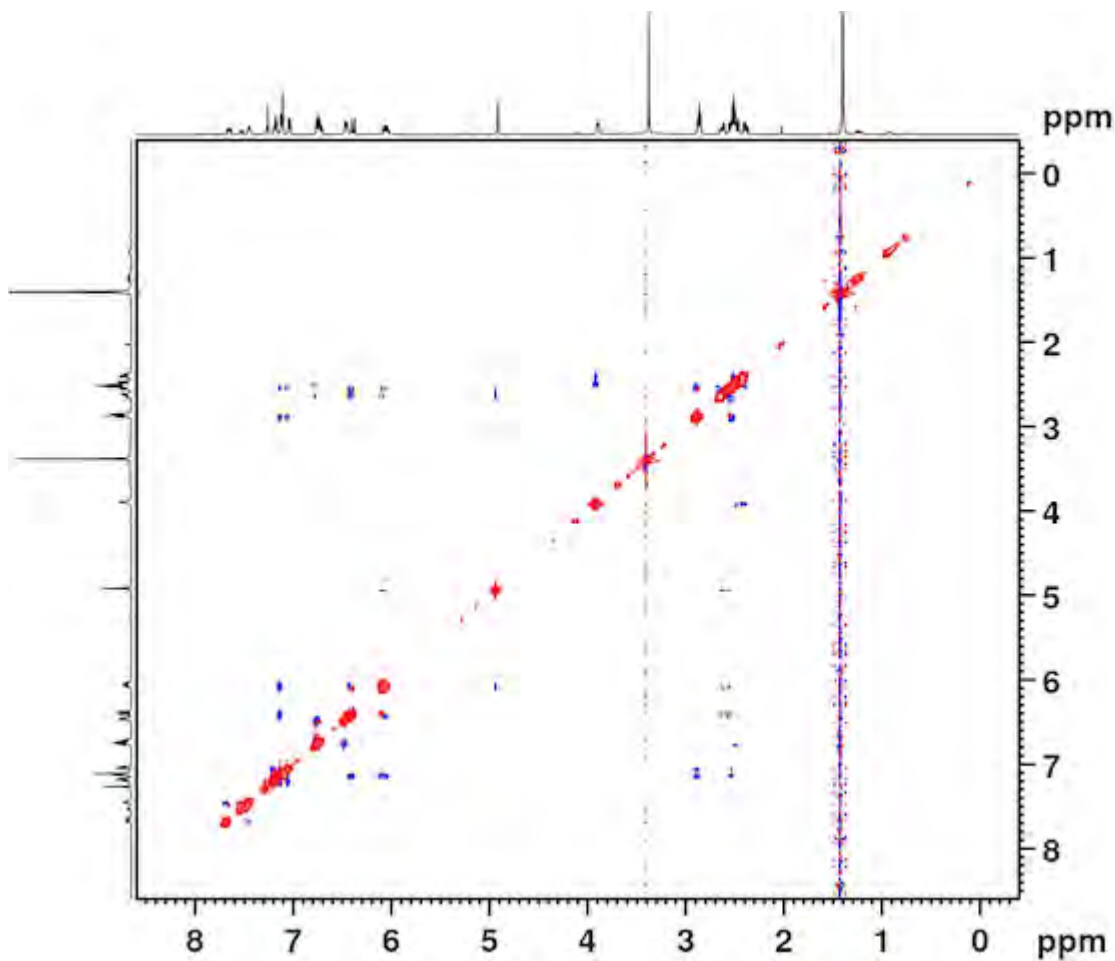

```

Current Data Parameters
NAME      TR6-778_408
EXPNO    52
PROCNO   1

F2 - Acquisition Parameters
Date_    20150904
Time     9.27
INSTRUM  av400
PROBHD   5 mm PABBO BB/
PULPROG  zgpg30
TD       2048
SOLVENT  CDCl3
NS       2
DS       8
SWH      3597.122 Hz
FIDRES   1.756407 Hz
AQ       0.2846720 sec
RG       8.85
DM       139.000 usec
DE       6.50 usec
TE       299.0 K
D0       0.00011990 sec
D1       2.00000000 sec
D8       0.75000000 sec
D11      0.03000000 sec
D12      0.00002000 sec
D16      0.00020000 sec
INQ      0.00027000 sec

===== CHANNEL F1 =====
SFO1     400.1316472 MHz
NUC1     1H
P1       15.00 usec
P2       30.00 usec
P17      2500.00 usec
PLW1     13.00000000 W
PLW10    4.32690001 W

===== GRADIENT CHANNEL =====
GPNAM[1] SMSQ10.100
GP21     40.00
F16      1000.00 usec

F1 - Acquisition parameters
TD       256
SFO1     400.1316 MHz
FIDRES   14.051259 Hz
SW       8.990 ppm
F0MODE   States-TPPI

F2 - Processing parameters
SI       2048
SF       400.1300062 MHz

```

tert-butyl ester 24

```

Current Data Parameters
NAME      TR6-98_500
EXPNO    4
PROCNO   1

F2 - Acquisition Parameters
Date_    20151005
Time     8.38
INSTRUM  av500
PROBHD   5 mm DCH 13C-1
PULPROG  zg
TD       65536
SOLVENT  DMSO
NS       8
DS       0
SHF      10000.000 Hz
FIDRES   0.152588 Hz
AQ       3.2767999 sec
RG       6.59
DM       50.000 usec
DE       10.00 usec
TE       298.0 K
D1       2.00000000 sec
TDO      1

===== CHANNEL f1 =====
SF01    500.1316687 MHz
NUC1     1H
P1       10.00 usec
PLN1    13.50000000 W

F2 - Processing parameters
SI       65536
SF       500.1300000 MHz
WDW      EM
SSB      0
LB       0.30 Hz
GB       0
PC       1.00
    
```

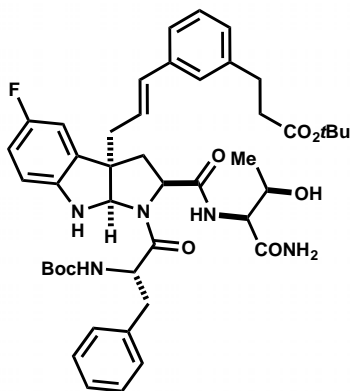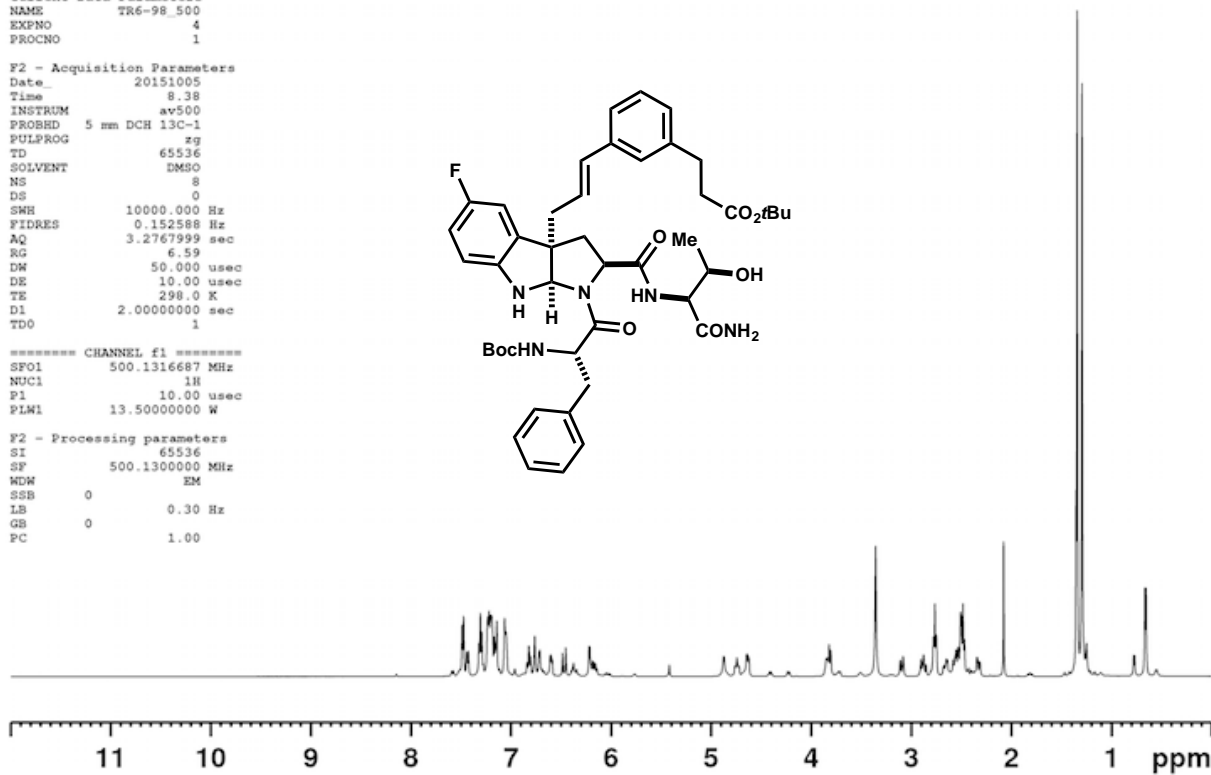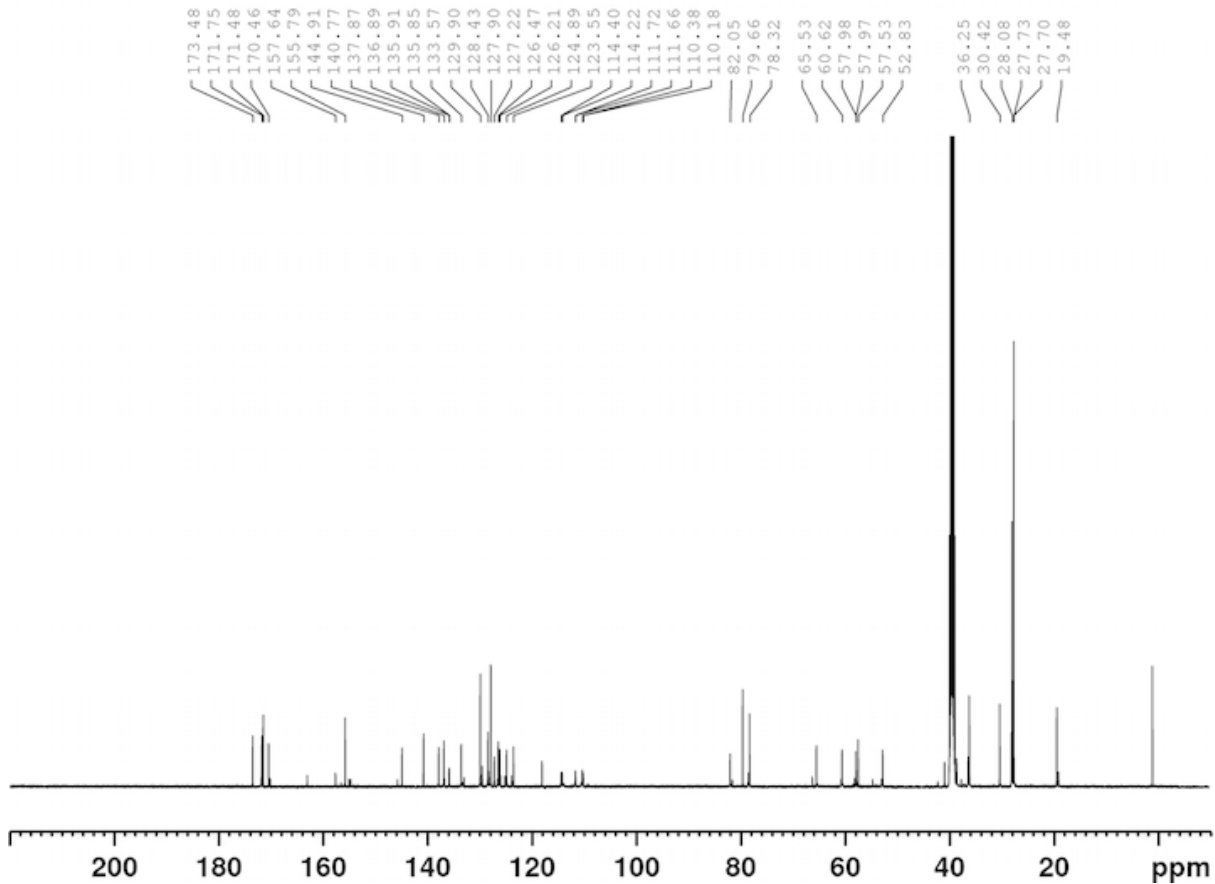

Acyclic Precursor **S8**

```

Current Data Parameters
NAME      KL-4-283
EXPNO    1
PROCNO   1

F2 - Acquisition Parameters
Date_    20120717
Time     19.26
INSTRUM  av500
PROBHD   5 mm DCH 13C-1
PULPROG  zg30
TD        65536
SOLVENT  MeOD
NS        8
DS        0
SWH       10000.000 Hz
FIDRES    0.152588 Hz
AQ        3.2767999 sec
RG        28.6
DN        50.000 usec
DE        10.00 usec
TE        296.0 K
DL        2.00000000 sec
TDO       1

----- CHANNEL f1 -----
NUC1      13C
P1        10.00 usec
PLM1      13.50000000 W
SFO1      500.1330008 MHz

F2 - Processing parameters
SI        65536
SF        500.1300146 MHz
WDW       EM
SSB       0
LB        0.30 Hz
GB        0
PC        1.00
    
```

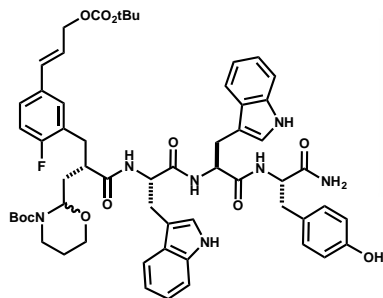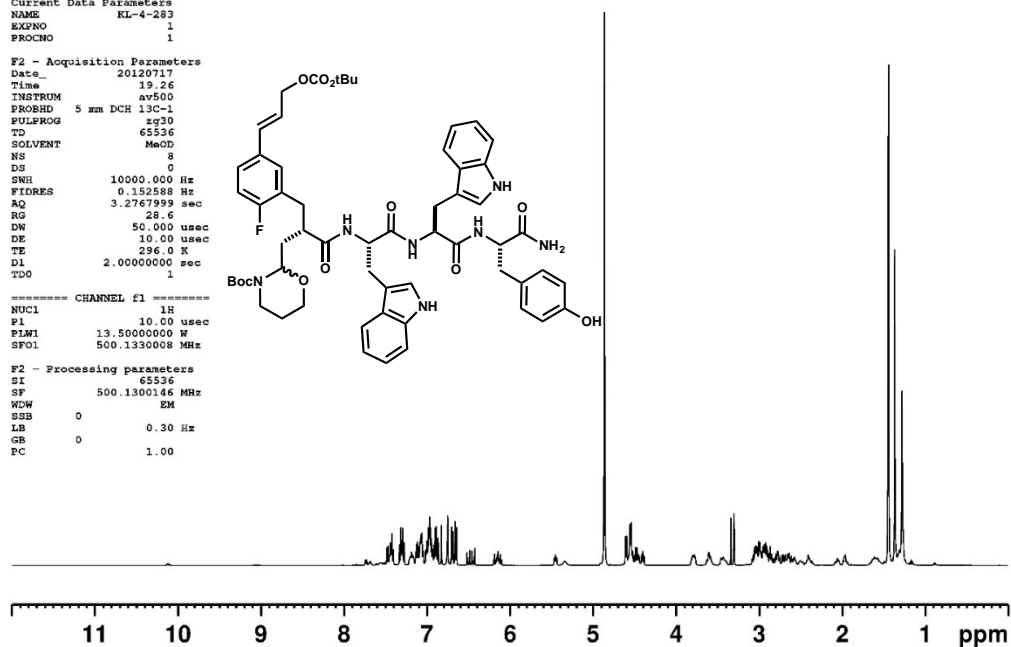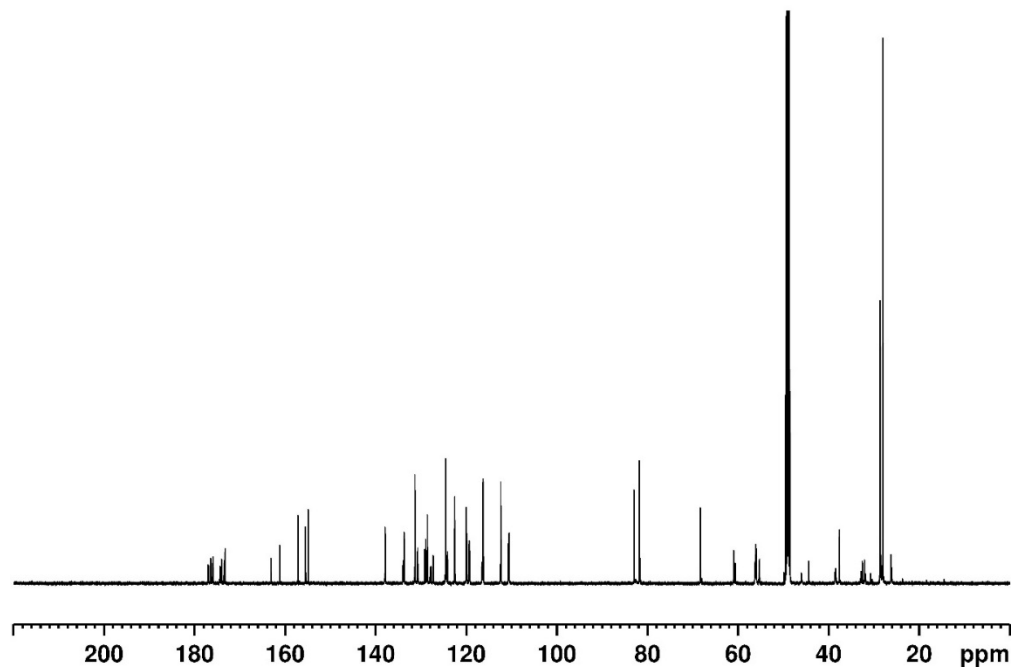



Tryptoline 27

```

Current Data Parameters
NAME      KL-5-2_pHPLC
EXPNO    2
PROCNO    1

F2 - Acquisition Parameters
Date_    20130516
Time     19.15
INSTRUM  av600
PROBHD   5 mm TBI5
PULPROG  zg
TD        65536
SOLVENT  DMSO
NS        8
DS        0
SWH       12376.237 Hz
FIDRES    0.188846 Hz
AQ        2.6476543 sec
RG         71.8
DW        40.400 usec
DE        6.50 usec
TE        293.5 K
D1        2.0000000 sec
TD0       1
    
```

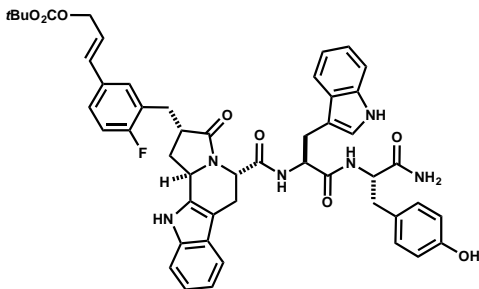

```

===== CHANNEL f1 =====
NUC1     1H
P1       9.70 usec
PL1      -2.00 dB
PL1W     39.81071854 W
SFO1     600.1336008 MHz
    
```

```

F2 - Processing parameters
SI        65536
SF        600.1300054 MHz
WDW       EM
SSB       0
LB        0.30 Hz
GB        0
PC        1.00
    
```

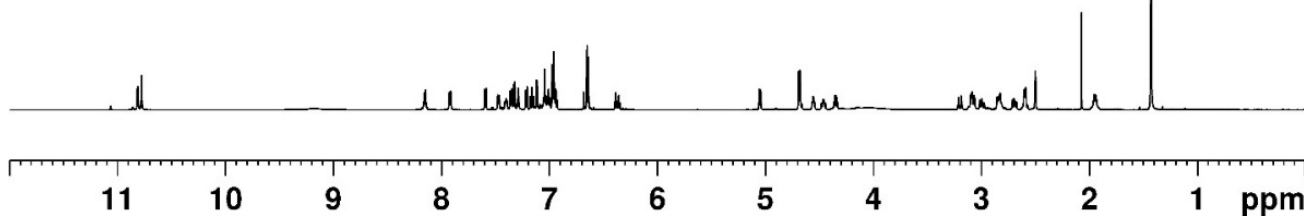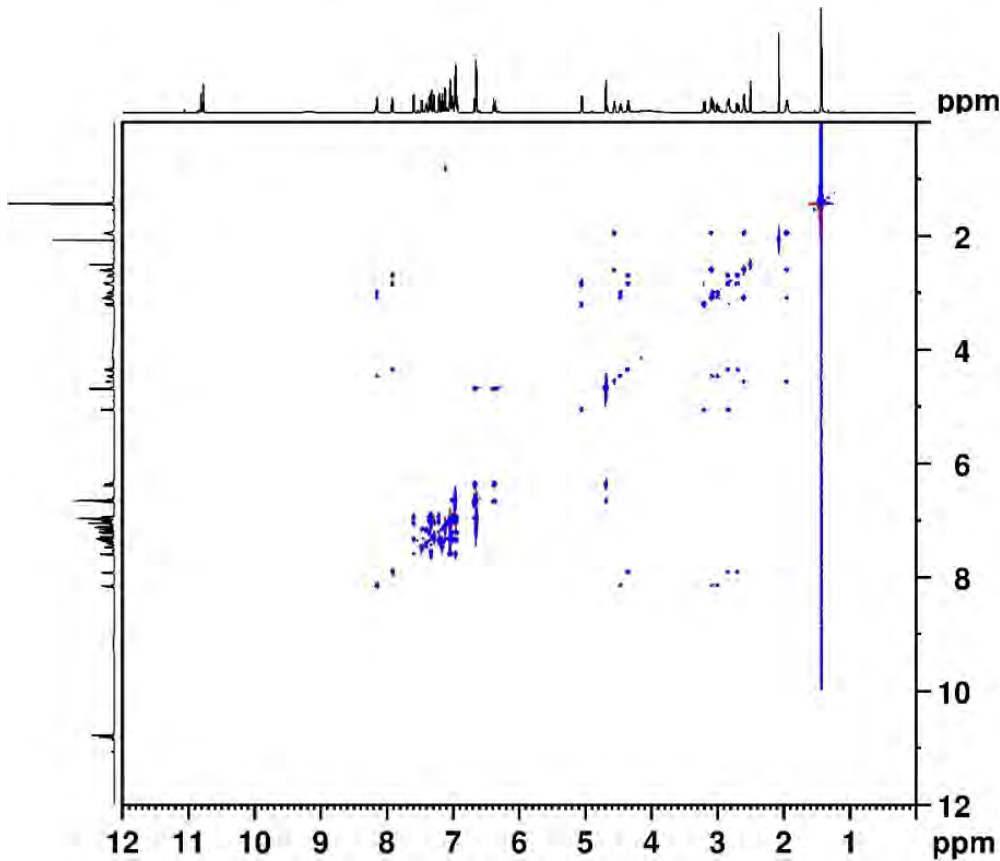

```

Current Data Parameters
NAME      KL-5-2_pHPLC
EXPNO    3
PROCNO    1
    
```

```

F2 - Acquisition Parameters
Date_    20130516
Time     19.17
INSTRUM  av600
PROBHD   5 mm TBI5
PULPROG  malevatgp.js
TD        4096
SOLVENT  DMSO
NS        4
DS        16
SWH       6009.615 Hz
FIDRES    1.467191 Hz
AQ        0.3407872 sec
RG         128
DW        83.200 usec
DE        6.50 usec
TE        293.6 K
D0        0.00000300 sec
D1        1.20000005 sec
D9        0.06000000 sec
D11       0.03000000 sec
D12       0.00002000 sec
D16       0.00020000 sec
IN0       0.00016665 sec
L1        24
    
```

```

===== CHANNEL f1 =====
NUC1     1H
P1       9.70 usec
P2       19.40 usec
P5       26.68 usec
P6       40.00 usec
P7       80.00 usec
P17      2500.00 usec
PL1      -2.00 dB
PL10     9.54 dB
PL1W     39.81071854 W
PL10W    2.79254389 W
SFO1     600.1330006 MHz
    
```

```

===== GRADIENT CHANNEL =====
GENAM[1] SINE.100
GENAM[2] SINE.100
GPX1     0 %
GPX2     0 %
GPY1     0 %
GPY2     0 %
GZ21     30.00 %
GZ22     30.00 %
    
```

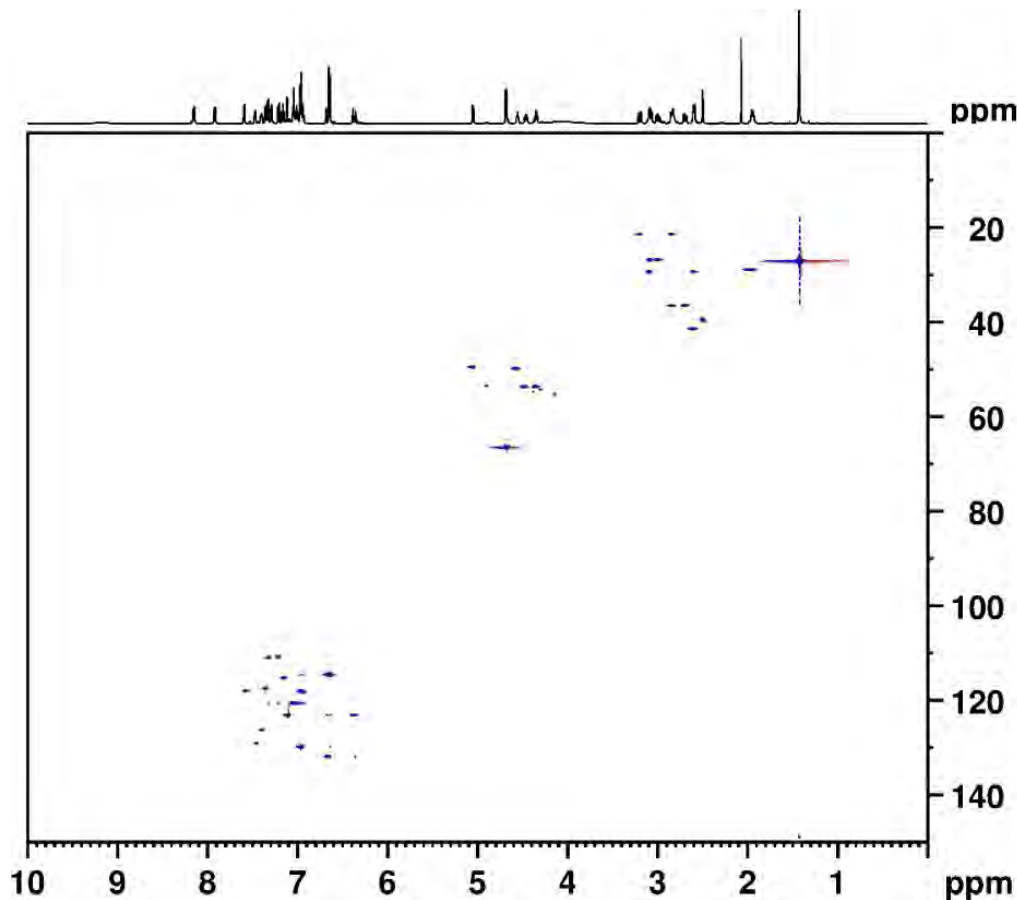

Current Data Parameters  
 NAME KL-5-2 pHPLC  
 EXPNO 4  
 PROCNO 1

F2 - Acquisition Parameters  
 Date\_ 20130516  
 Time 20.25  
 INSTRUM av600  
 PROBHD 5 mm TB15  
 PULPROG hsqcqtgpsiisp  
 TD 2048  
 SOLVENT DMSO  
 NS 8  
 DS 16  
 SWH 7183.908 Hz  
 FIDRES 3.507768 Hz  
 AQ 0.1425408 sec  
 RG 16384  
 DW 69.600 usec  
 DE 6.00 usec  
 TE 294.3 K  
 CNST2 145.0000000  
 D0 0.00000300 sec  
 D1 1.20000005 sec  
 D4 0.00172414 sec  
 D11 0.03000000 sec  
 D16 0.00020000 sec  
 D24 0.00086200 sec  
 IN0 0.00002070 sec  
 ZGPTNS

===== CHANNEL f1 =====  
 NUC1 1H  
 P1 9.70 usec  
 P2 19.40 usec  
 P28 1000.00 usec  
 PL1 -2.00 dB  
 PLLW 39.81071854 W  
 SFO1 600.1330006 MHz

===== CHANNEL f2 =====  
 CPDPRG[2] garp  
 NUC2 13C  
 P3 18.50 usec  
 P4 37.00 usec  
 P14 1000.00 usec  
 PCPD2 65.00 usec  
 FLO 120.00 dB  
 PL2 -3.00 dB  
 PLL2 7.91 dB  
 FLOW 0 W  
 PL2W 150.35617065 W  
 PLL2W 12.19330025 W  
 SFO2 150.9133722 MHz

Current Data Parameters  
 NAME KL-5-2 pHPLC  
 EXPNO 5  
 PROCNO 1

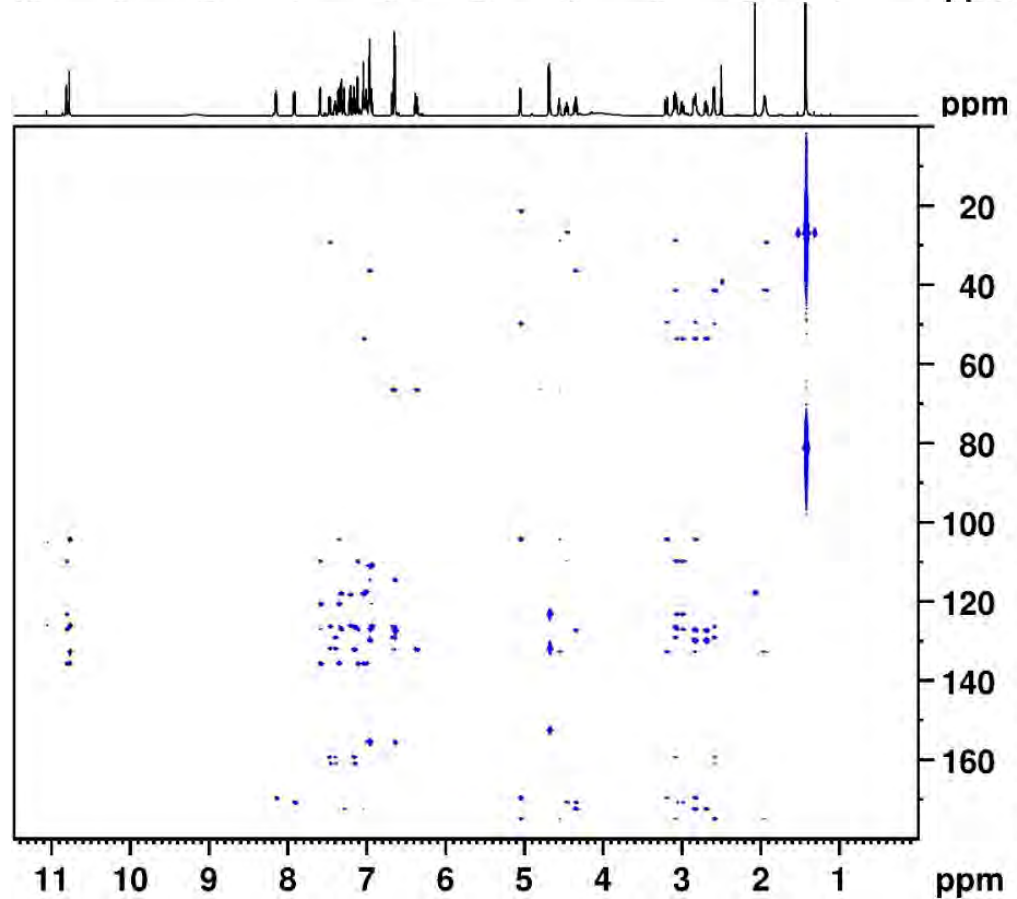

F2 - Acquisition Parameters  
 Date\_ 20130516  
 Time 22.00  
 INSTRUM av600  
 PROBHD 5 mm TB15  
 PULPROG hmbcggplpndqf  
 TD 2048  
 SOLVENT DMSO  
 NS 16  
 DS 64  
 SWH 6887.052 Hz  
 FIDRES 3.362818 Hz  
 AQ 0.1486848 sec  
 RG 26008  
 DW 72.600 usec  
 DE 6.00 usec  
 TE 296.0 K  
 CNST2 145.0000000  
 CNST13 7.0000000  
 D0 0.00000300 sec  
 D1 1.20000005 sec  
 D2 0.00344828 sec  
 D6 0.07142857 sec  
 D16 0.00020000 sec  
 IN0 0.00001745 sec

===== CHANNEL f1 =====  
 NUC1 1H  
 P1 9.70 usec  
 P2 19.40 usec  
 PL1 -2.00 dB  
 PLLW 39.81071854 W  
 SFO1 600.1334507 MHz

===== CHANNEL f2 =====  
 NUC2 13C  
 P3 18.50 usec  
 PL2 -3.00 dB  
 PLLW 150.35617065 W  
 SFO2 150.9156357 MHz

===== GRADIENT CHANNEL =====  
 GPNAM[1] SINE.100  
 GPNAM[2] SINE.100  
 GPNAM[3] SINE.100  
 GPX1 0 %  
 GPX2 0 %  
 GPX3 0 %  
 GPY1 0 %  
 GPY2 0 %

Macrocyclic Product 28a

```

Current Data Parameters
NAME      KL-5-164-1
EXPNO     9
PROCNO    1

F2 - Acquisition Parameters
Date_     20130522
Time      18.27
INSTRUM   av600
PROBHD    5 mm TBI5
PULPROG   zg
TD         65536
SOLVENT   DMSO
NS         8
DS         0
SWH       12376.237 Hz
FIDRES    0.188846 Hz
AQ         2.6476543 sec
RG         128
DW         40.400 usec
DE         6.50 usec
TE         298.0 K
D1         2.0000000 sec
TD0        1

===== CHANNEL f1 =====
NUC1      1H
P1        9.85 usec
PL1       -2.00 dB
PLLW      39.81071854 W
SFO1      600.1336008 MHz

F2 - Processing parameters
SI        65536
SF        600.1300059 MHz
WDW       EM
SSB       0
LB        0.30 Hz
GB        0
PC        1.00
    
```

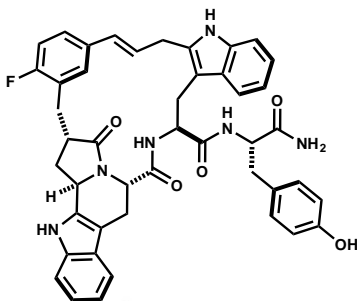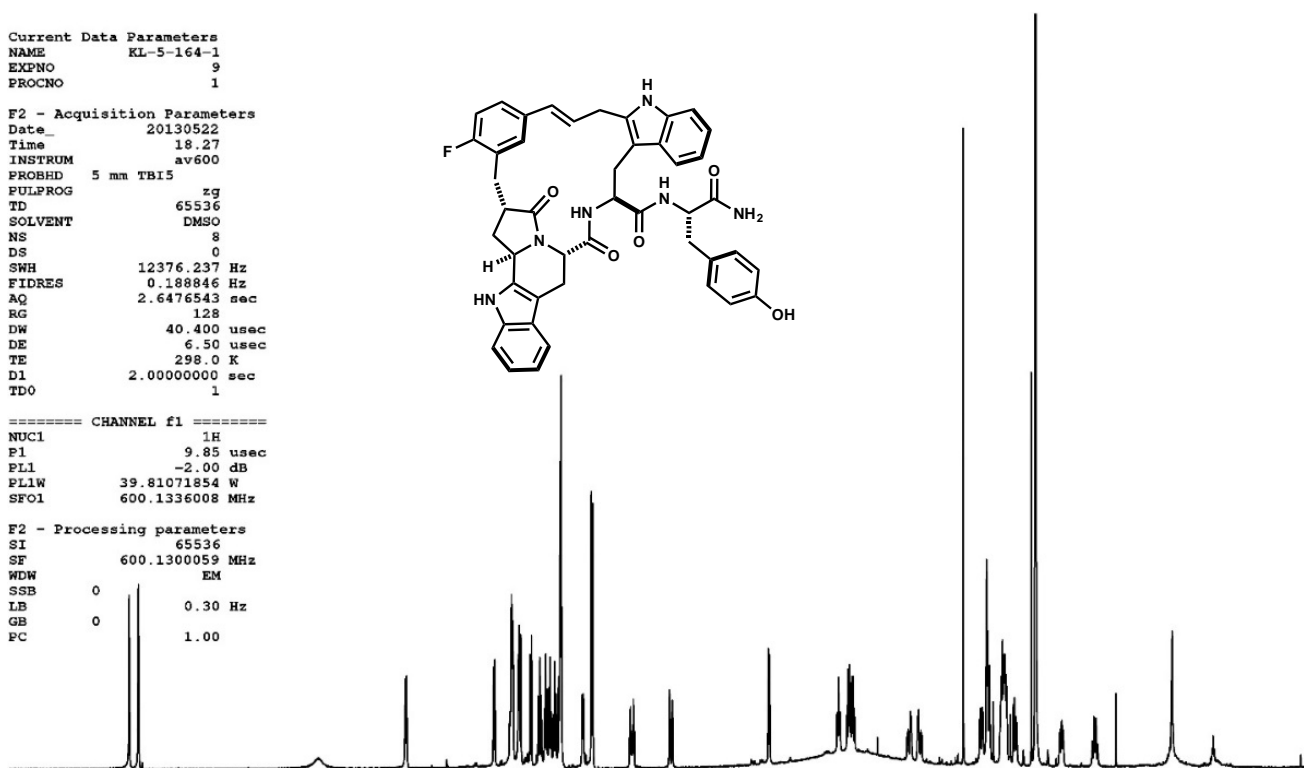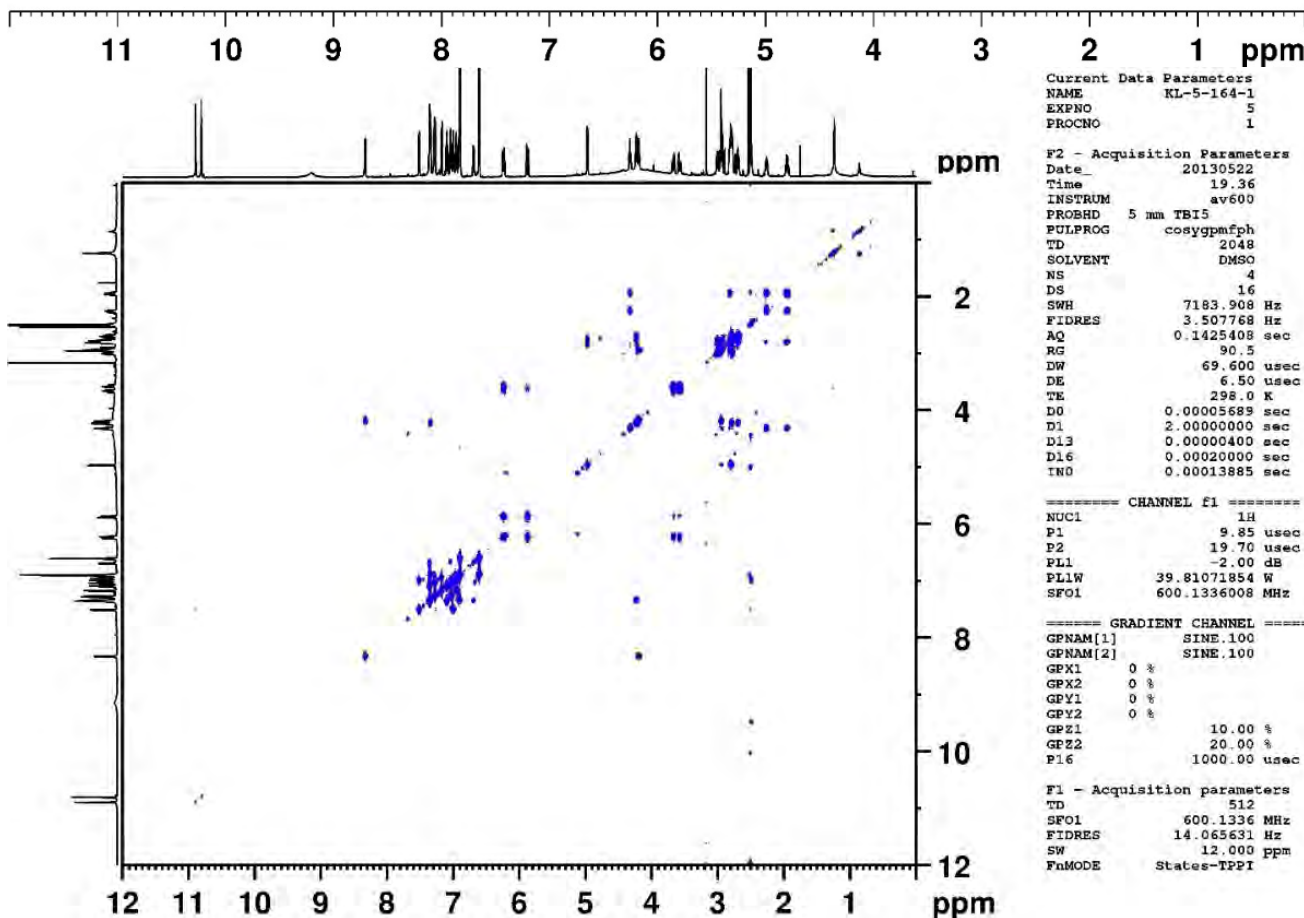

```

Current Data Parameters
NAME      KL-5-164-1
EXPNO     5
PROCNO    1

F2 - Acquisition Parameters
Date_     20130522
Time      19.36
INSTRUM   av600
PROBHD    5 mm TBI5
PULPROG   cosygpmfph
TD         2048
SOLVENT   DMSO
NS         4
DS         16
SWH       7183.908 Hz
FIDRES    3.507768 Hz
AQ         0.1425408 sec
RG         90.5
DW         69.600 usec
DE         6.50 usec
TE         298.0 K
D0         0.00005689 sec
D1         2.00000000 sec
D13        0.00000400 sec
D16        0.00020000 sec
IN0        0.00013885 sec

===== CHANNEL f1 =====
NUC1      1H
P1        9.85 usec
P2        19.70 usec
PL1       -2.00 dB
PLLW      39.81071854 W
SFO1      600.1336008 MHz

===== GRADIENT CHANNEL =====
GPNAM[1]  SINE.100
GPNAM[2]  SINE.100
GPX1      0 %
GPX2      0 %
GPY1      0 %
GPY2      0 %
GPZ1      10.00 %
GPZ2      20.00 %
P16       1000.00 usec

F1 - Acquisition parameters
TD         512
SFO1      600.1336 MHz
FIDRES    14.065631 Hz
SW         12.000 ppm
FnMODE    States-TPPI
    
```

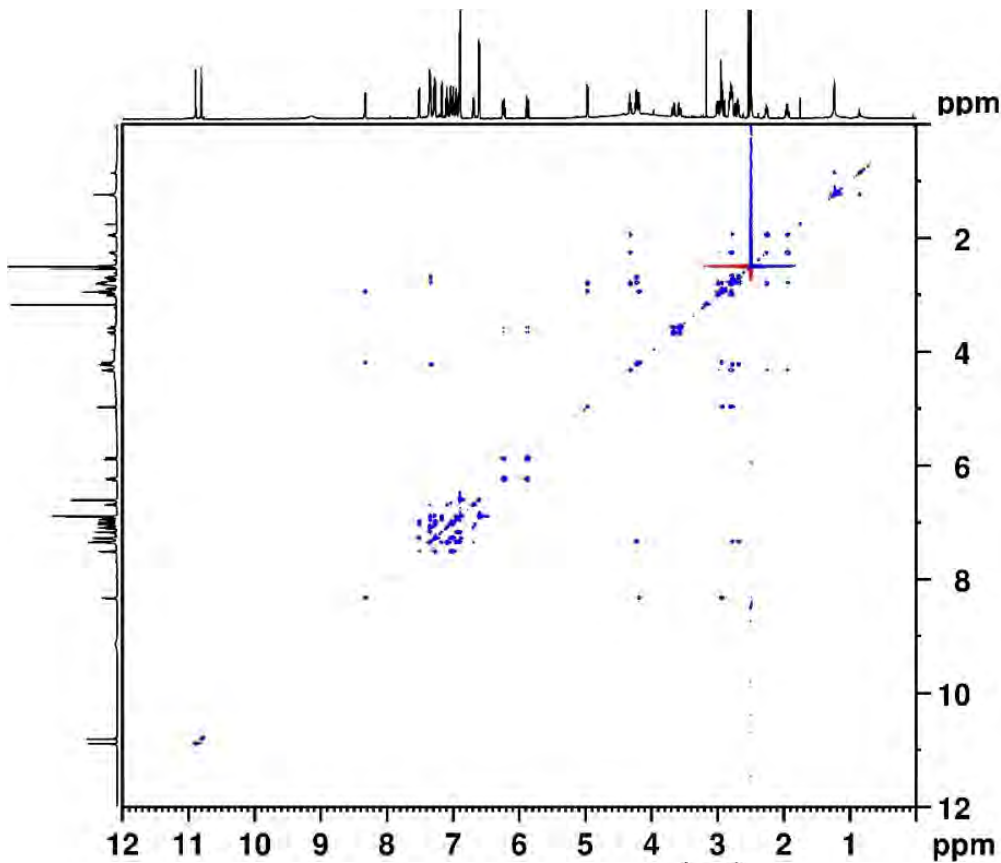

Current Data Parameters  
 NAME KL-5-164-1  
 EXPNO 4  
 PROCNO 1

F2 - Acquisition Parameters  
 Date\_ 20130522  
 Time 18.31  
 INSTRUM av600  
 PROBHD 5 mm TBI5  
 PULPROG mlevatgp.js  
 TD 4096  
 SOLVENT DMSO  
 NS 4  
 DS 16  
 SWH 7183.908 Hz  
 FIDRES 1.753884 Hz  
 AQ 0.2850816 sec  
 RG 90.5  
 DW 69.600 usec  
 DE 6.50 usec  
 TE 298.0 K  
 D0 0.00000300 sec  
 D1 1.20000005 sec  
 D9 0.06000000 sec  
 D11 0.03000000 sec  
 D12 0.00002000 sec  
 D16 0.00020000 sec  
 IN0 0.00013885 sec  
 L1 24

==== CHANNEL f1 =====  
 NUC1 1H  
 P1 9.85 usec  
 P2 19.70 usec  
 P5 26.68 usec  
 P6 40.00 usec  
 P7 80.00 usec  
 P17 2500.00 usec  
 PL1 -2.00 dB  
 PL10 9.54 dB  
 PL1W 39.81071854 W  
 PL1OW 2.79254389 W  
 SFO1 600.1336008 MHz

===== GRADIENT CHANNEL =====  
 GENAM[1] SINE.100  
 GENAM[2] SINE.100  
 GPX1 0 %  
 GPX2 0 %  
 GPY1 0 %  
 GPY2 0 %  
 GEZ1 30.00 %  
 GEZ2 30.00 %

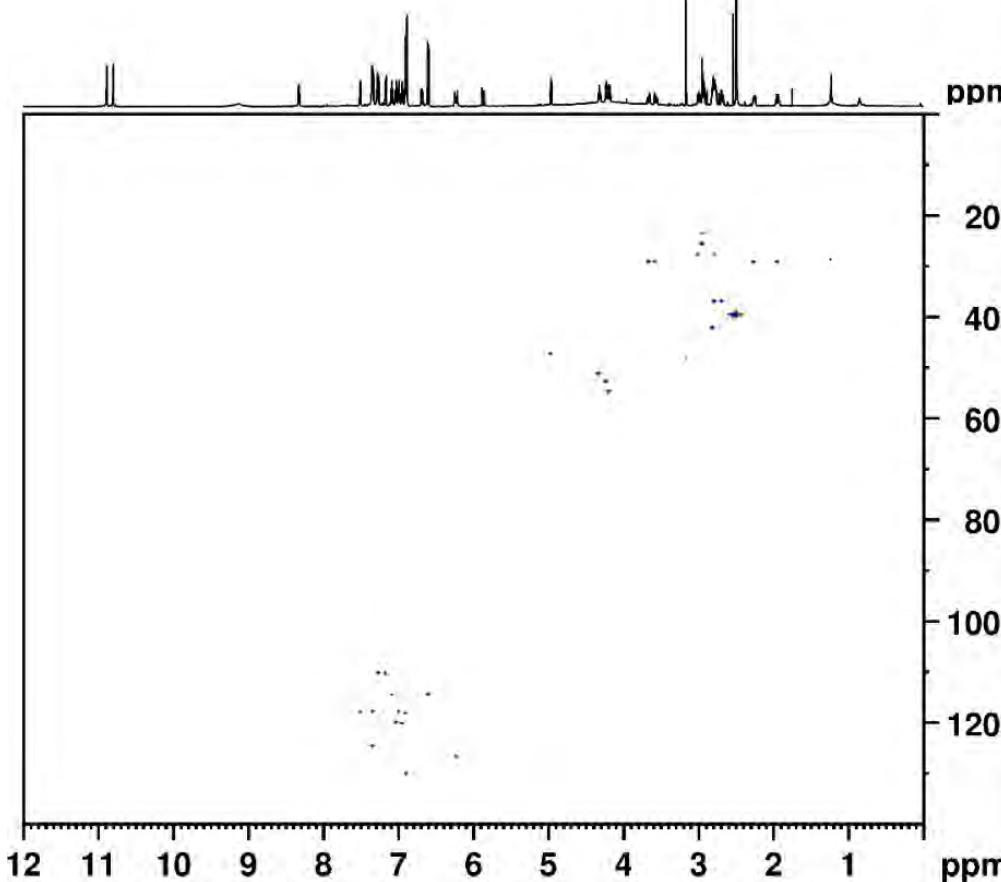

Current Data Parameters  
 NAME KL-5-164-1  
 EXPNO 6  
 PROCNO 1

F2 - Acquisition Parameters  
 Date\_ 20130522  
 Time 20.51  
 INSTRUM av600  
 PROBHD 5 mm TBI5  
 PULPROG hsqcetgpsisp  
 TD 2048  
 SOLVENT DMSO  
 NS 8  
 DS 16  
 SWH 7183.908 Hz  
 FIDRES 3.507768 Hz  
 AQ 0.1425408 sec  
 RG 16384  
 DW 69.600 usec  
 DE 6.00 usec  
 TE 298.1 K  
 CNST2 145.0000000  
 d0 0.00000300 sec  
 D1 1.20000005 sec  
 d4 0.00172414 sec  
 d11 0.03000000 sec  
 D16 0.00020000 sec  
 D24 0.00086200 sec  
 DELTA 0.00127570 sec  
 DELTA1 0.00120632 sec  
 DELTA2 0.00122414 sec  
 in0 0 sec  
 ST1CNT 256  
 ZGPTNS  
 d0orig 0.00000300 sec  
 phlloop 0  
 tiloop 0  
 SFO1 600.1330006 MHz  
 NUC1 1H  
 P1 9.85 usec  
 p2 19.70 usec  
 P28 1000.00 usec  
 PLW1 -1.00000000 W  
 SFO2 150.9133722 MHz  
 NUC2 13C  
 CPDPRG[2] garp  
 P3 18.50 usec  
 p4 37.00 usec  
 P14 1000.00 usec  
 PCPD2 65.00 usec  
 ELW0 -1.00000000 W  
 ELW2 -1.00000000 W  
 ELW12 -1.00000000 W  
 SPNAM[31] Cno80 0.5 20.1

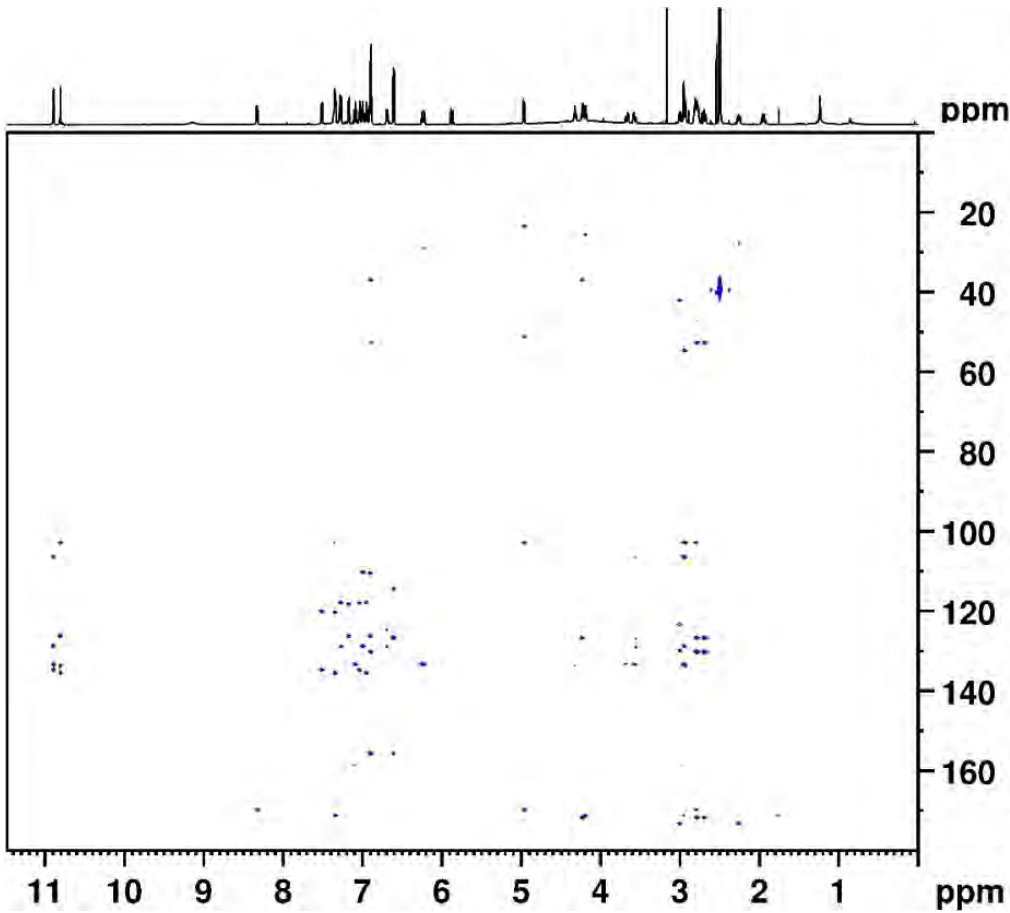

Current Data Parameters  
 NAME KL-5-164-1  
 EXPNO 7  
 PROCNO 1

F2 - Acquisition Parameters  
 Date\_ 20130522  
 Time 22.26  
 INSTRUM av600  
 PROBRD 5 mm TBI5  
 PULPROG hmbcgp1pndqf  
 TD 2048  
 SOLVENT DMSO  
 NS 32  
 DS 64  
 SWH 6887.052 Hz  
 FIDRES 3.362818 Hz  
 AQ 0.1486848 sec  
 RG 26008  
 DW 72.600 usec  
 DE 6.00 usec  
 TE 298.0 K  
 CNST12 145.0000000  
 CNST13 7.0000000  
 d0 0.00000300 sec  
 d1 1.20000005 sec  
 d2 0.00344828 sec  
 d6 0.07142857 sec  
 D16 0.00020000 sec  
 in0 0 sec  
 ST1CNT 512  
 d0orig 0.00000300 sec  
 phloop 0  
 tloop 0  
 SFO1 600.1334507 MHz  
 NUC1 1H  
 P1 9.85 usec  
 p2 19.70 usec  
 PLW1 -1.00000000 W  
 SFO2 150.9156357 MHz  
 NUC2 13C  
 P3 18.50 usec  
 PLW2 -1.00000000 W  
 GPNAM[1] SINE.100  
 GPNAM[2] SINE.100  
 GPNAM[3] SINE.100  
 GPZ1 50.00 %  
 GPZ2 30.00 %  
 GPZ3 40.10 %  
 P16 1000.00 usec

F1 - Acquisition parameters  
 TD 512  
 SFO1 150.9156 MHz  
 FIDRES 56.003849 Hz

Macrocyclic Product 28b

Current Data Parameters  
 NAME KL-5-255-2 (AV500)  
 EXPNO 6  
 PROCNO 1

F2 - Acquisition Parameters  
 Date\_ 20140218  
 Time 20.49  
 INSTRUM av500  
 PROBHD 5 mm DCH 13C-1  
 PULPROG zg  
 TD 65536  
 SOLVENT DMSO  
 NS 32  
 DS 0  
 SWH 10000.000 Hz  
 FIDRES 0.152588 Hz  
 AQ 3.2767999 sec  
 RG 19.07  
 DW 50.000 usec  
 DE 10.00 usec  
 TE 298.0 K  
 D1 2.0000000 sec  
 TD0 1

==== CHANNEL f1 =====  
 SFO1 500.1330008 MHz  
 NUC1 1H  
 P1 9.95 usec  
 PLW1 13.5000000 W

F2 - Processing parameters  
 SI 65536  
 SF 500.1300037 MHz  
 WDW EM  
 SSB 0  
 LB 0.30 Hz  
 GB 0  
 PC 1.00

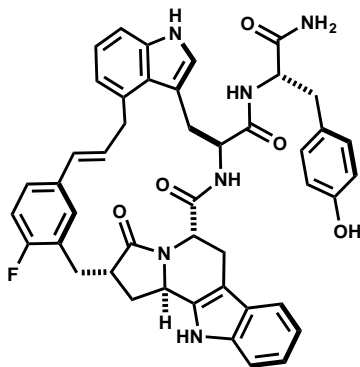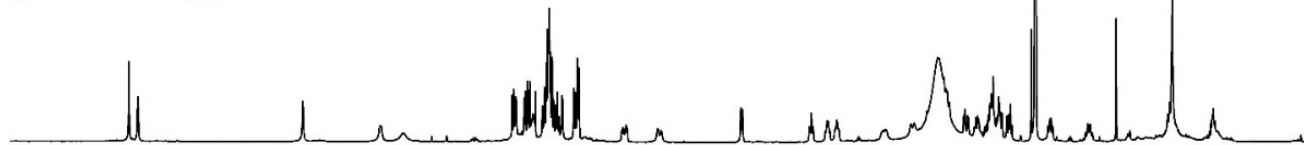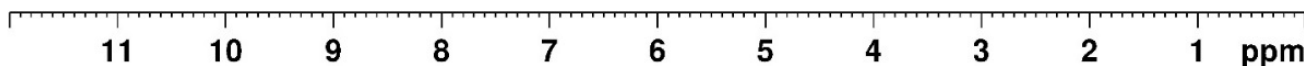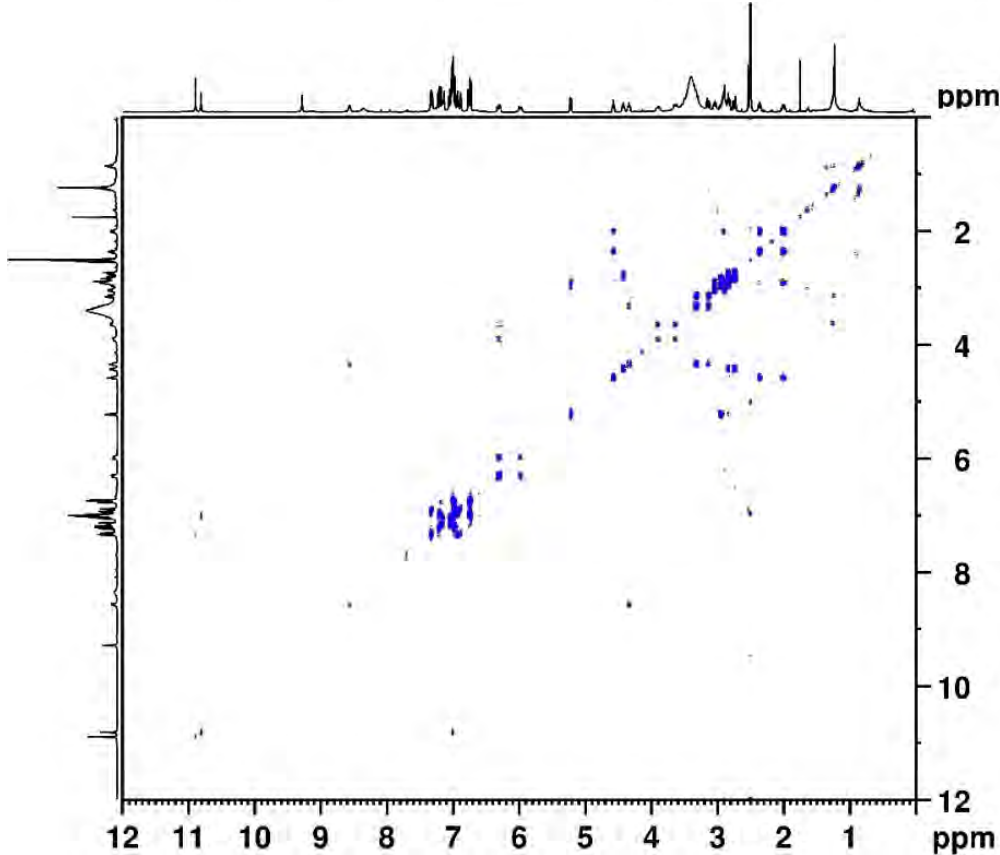

Current Data Parameters  
 NAME KL-5-255-2 (AV500)  
 EXPNO 8  
 PROCNO 1

F2 - Acquisition Parameters  
 Date\_ 20140218  
 Time 21.29  
 INSTRUM av500  
 PROBHD 5 mm DCH 13C-1  
 PULPROG cosygmph  
 TD 4096  
 SOLVENT DMSO  
 NS 2  
 DS 8  
 SWH 6009.615 Hz  
 FIDRES 1.467191 Hz  
 AQ 0.3407872 sec  
 RG 26.58  
 DW 83.200 usec  
 DE 10.00 usec  
 TE 298.0 K  
 D0 0.00007063 sec  
 D1 2.0000000 sec  
 D13 0.00000400 sec  
 D16 0.00020000 sec  
 IN0 0.00016660 sec

==== CHANNEL f1 =====  
 SFO1 500.1330008 MHz  
 NUC1 1H  
 P1 9.95 usec  
 P2 19.90 usec  
 PLW1 13.5000000 W

===== GRADIENT CHANNEL =====  
 GPNAM[1] SMSQ10.100  
 GPNAM[2] SMSQ10.100  
 GPZ1 10.00 %  
 GPZ2 20.00 %  
 P16 1000.00 usec

F1 - Acquisition parameters  
 TD 512  
 SFO1 500.133 MHz  
 FIDRES 11.723439 Hz  
 SW 12.002 ppm  
 FnMODE States-TFPI

F2 - Processing parameters  
 SI 2048  
 SF 500.1300026 MHz  
 WDW SINE  
 SSB 1

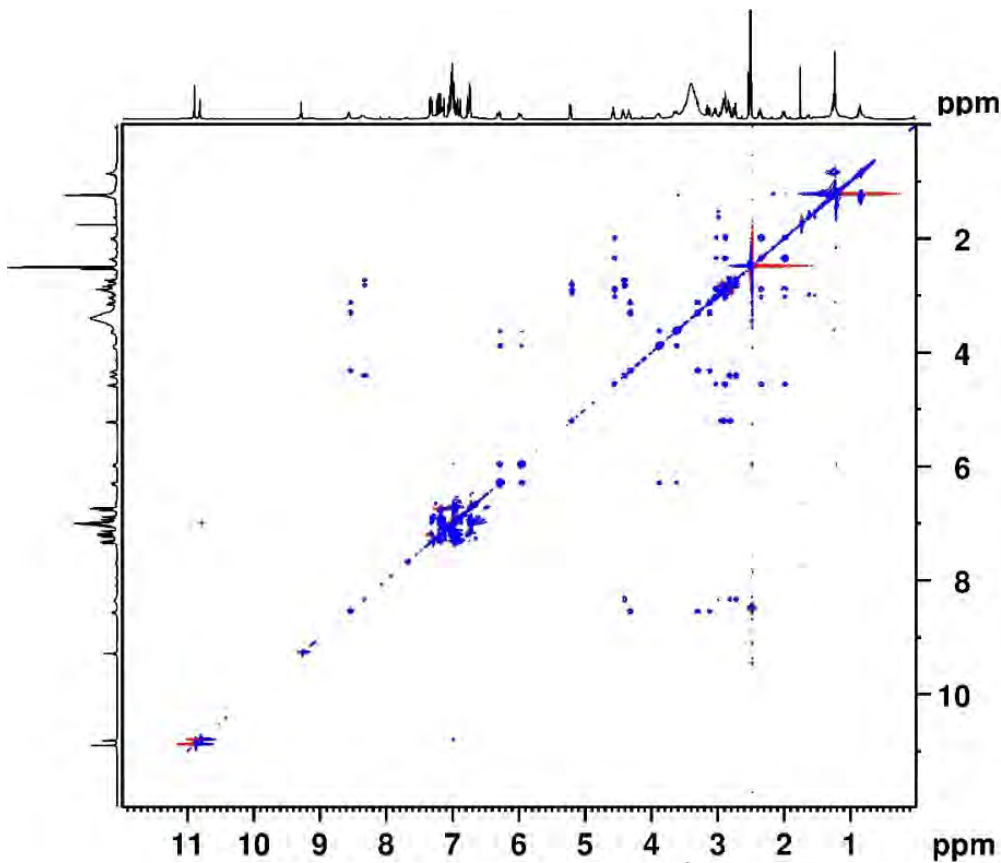

Current Data Parameters  
 NAME KL-5-255-2 (AV500)  
 EXPNO 7  
 PROCNO 1

F2 - Acquisition Parameters  
 Date\_ 20140218  
 Time 20.49  
 INSTRUM av500  
 PROBHD 5 mm DCH 13C-1  
 PULPROG mlevatgp\_ja  
 TD 2048  
 SOLVENT DMSO  
 NS 2  
 DS 2  
 SWH 6009.615 Hz  
 FIDRES 2.934382 Hz  
 AQ 0.1703936 sec  
 RG 26.58  
 DW 83.200 usec  
 DE 10.00 usec  
 TE 298.0 K  
 D0 0.00000300 sec  
 D1 2.00000000 sec  
 D9 0.06000000 sec  
 D11 0.03000000 sec  
 D12 0.00002000 sec  
 D16 0.00020000 sec  
 IN0 0.00016660 sec  
 L1 24

==== CHANNEL f1 =====  
 SFO1 500.1330008 MHz  
 NUC1 1H  
 P1 9.95 usec  
 P2 19.90 usec  
 P5 26.68 usec  
 P6 40.00 usec  
 P7 80.00 usec  
 P17 2500.00 usec  
 PLW1 13.50000000 W  
 PLW10 0.84375000 W

===== GRADIENT CHANNEL =====  
 GPNAM[1] SINE.100  
 GPNAM[2] SINE.100  
 GPZ1 30.00 %  
 GPZ2 30.00 %  
 P16 1000.00 usec

F1 - Acquisition parameters  
 TD 512  
 SFO1 500.133 MHz  
 FIDRES 11.723439 Hz

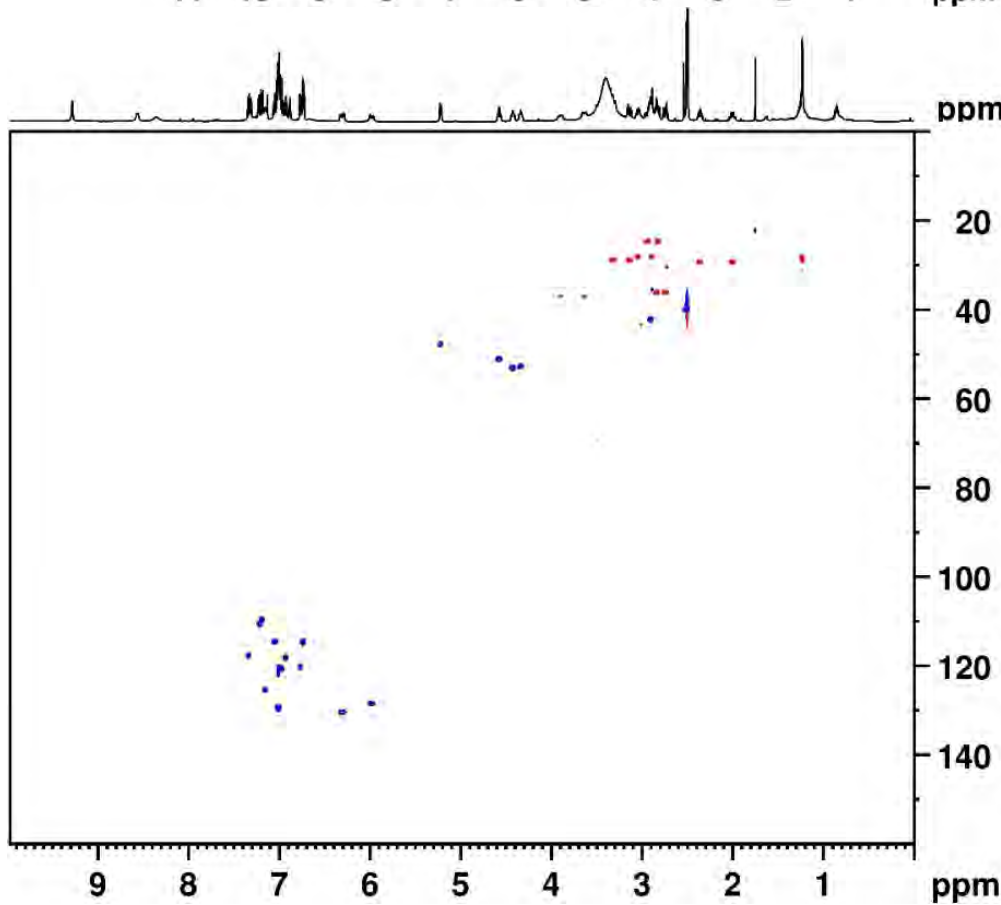

Current Data Parameters  
 NAME KL-5-255-2 (AV500)  
 EXPNO 9  
 PROCNO 1

F2 - Acquisition Parameters  
 Date\_ 20140218  
 Time 22.10  
 INSTRUM av500  
 PROBHD 5 mm DCH 13C-1  
 PULPROG hsqcedetgp  
 TD 2048  
 SOLVENT DMSO  
 NS 16  
 DS 16  
 SWH 5000.000 Hz  
 FIDRES 2.441406 Hz  
 AQ 0.2048000 sec  
 RG 204.86  
 DW 100.000 usec  
 DE 10.00 usec  
 TE 298.0 K  
 CNST2 145.0000000  
 D0 0.00000300 sec  
 D1 1.50000000 sec  
 D4 0.00172414 sec  
 D11 0.03000000 sec  
 D13 0.00000400 sec  
 D16 0.00020000 sec  
 D21 0.00345000 sec  
 IN0 0.00001990 sec  
 ZGPTNS

==== CHANNEL f1 =====  
 SFO1 500.1325007 MHz  
 NUC1 1H  
 P1 9.95 usec  
 P2 19.90 usec  
 P28 0 usec  
 PLW1 13.50000000 W

==== CHANNEL f2 =====  
 SFO2 125.7678496 MHz  
 NUC2 13C  
 CPDPRG[2] garp  
 P3 9.63 usec  
 P4 19.26 usec  
 PCPD2 70.00 usec  
 PLW2 23.01399994 W  
 PLW12 0.43557000 W

===== GRADIENT CHANNEL =====  
 GPNAM[1] SMSQ10.100  
 GPNAM[2] SMSQ10.100  
 GPZ1 80.00 %

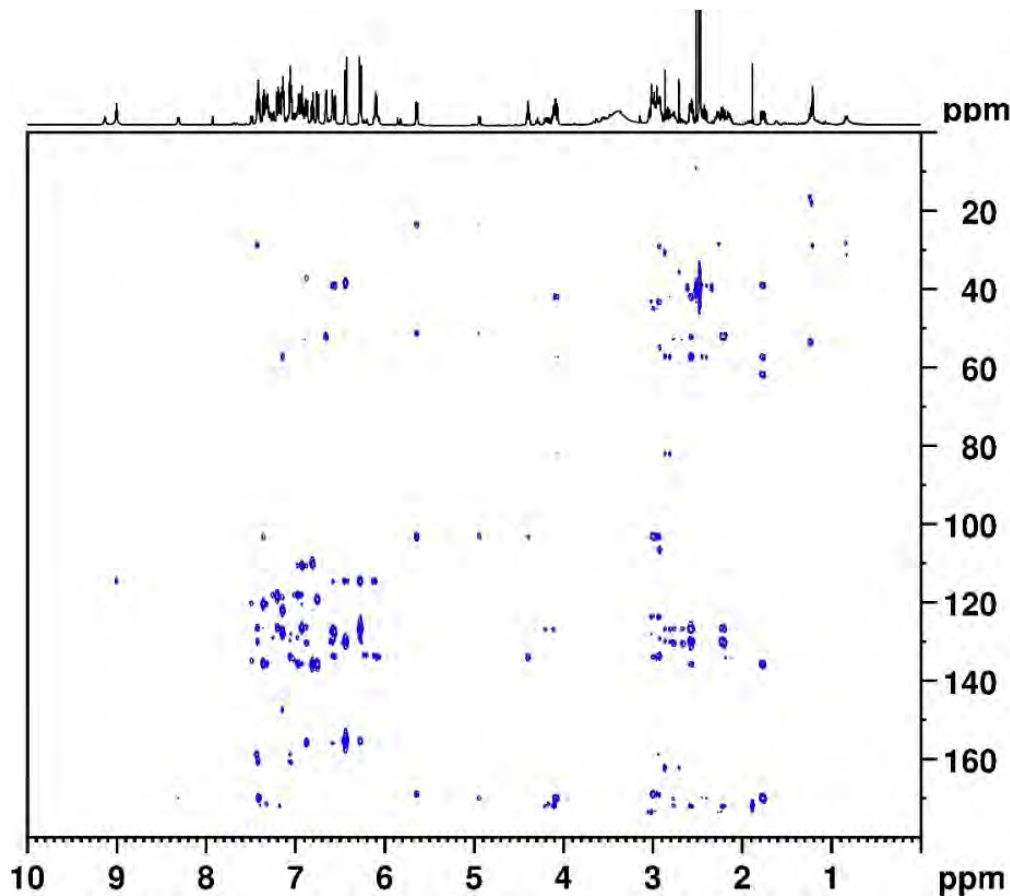

Current Data Parameters  
 NAME KL-5-255-5  
 EXPNO 8  
 PROCNO 1

F2 - Acquisition Parameters  
 Date\_ 20140207  
 Time 21.01  
 INSTRUM av500  
 PROBHD 5 mm DCH 13C-1  
 PULPROG hmbcgp12ndqf  
 TD 2048  
 SOLVENT DMSO  
 NS 24  
 DS 16  
 SWH 5000.000 Hz  
 FIDRES 2.441406 Hz  
 AQ 0.2048000 sec  
 RG 204.86  
 DW 100.000 usec  
 DE 10.00 usec  
 TE 298.0 K  
 CNST6 120.0000000  
 CNST7 160.0000000  
 CNST13 7.0000000  
 D0 0.00000300 sec  
 D1 1.50000000 sec  
 D6 0.07142857 sec  
 D16 0.00020000 sec  
 INO 0.00001990 sec

==== CHANNEL f1 =====  
 SFO1 500.1325007 MHz  
 NUC1 1H  
 P1 10.50 usec  
 P2 21.00 usec  
 PLW1 13.50000000 W

==== CHANNEL f2 =====  
 SFO2 125.7703648 MHz  
 NUC2 13C  
 P3 9.63 usec  
 PLW2 23.01399994 W

==== GRADIENT CHANNEL =====  
 GPNAM[1] SMSQ10.100  
 GPNAM[2] SMSQ10.100  
 GPNAM[3] SMSQ10.100  
 GPNAM[4] SMSQ10.100  
 GPNAM[5] SMSQ10.100  
 GPNAM[6] SMSQ10.100  
 GPZ1 50.00 %  
 GPZ2 30.00 %  
 GPZ3 40.10 %  
 GPZ4 15.00 %



Macrocyclic Product 28c

```

Current Data Parameters
NAME      KL-5-164-3
EXPNO    2
PROCNO   1

F2 - Acquisition Parameters
Date_    20130521
Time     19.45
INSTRUM  av600
PROBHD   5 mm TBI5
PULPROG  zg
TD        65536
SOLVENT  DMSO
NS        16
DS        0
SWH      12376.237 Hz
FIDRES   0.188846 Hz
AQ        2.6476543 sec
RG        90.5
DW        40.400 usec
DE        6.50 usec
TE        293.6 K
D1        2.0000000 sec
TDO       1

===== CHANNEL f1 =====
NUC1      1H
P1        9.90 usec
PL1       -2.00 dB
PLLW      39.81071854 W
SFO1      600.1336008 MHz

F2 - Processing parameters
SI        65536
SF        600.1300273 MHz
WDW       EM
SSB       0
LB        0.30 Hz
GB        0
PC        1.00
    
```

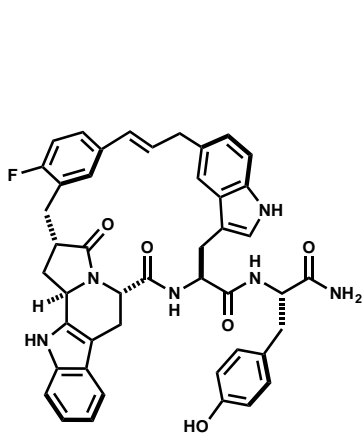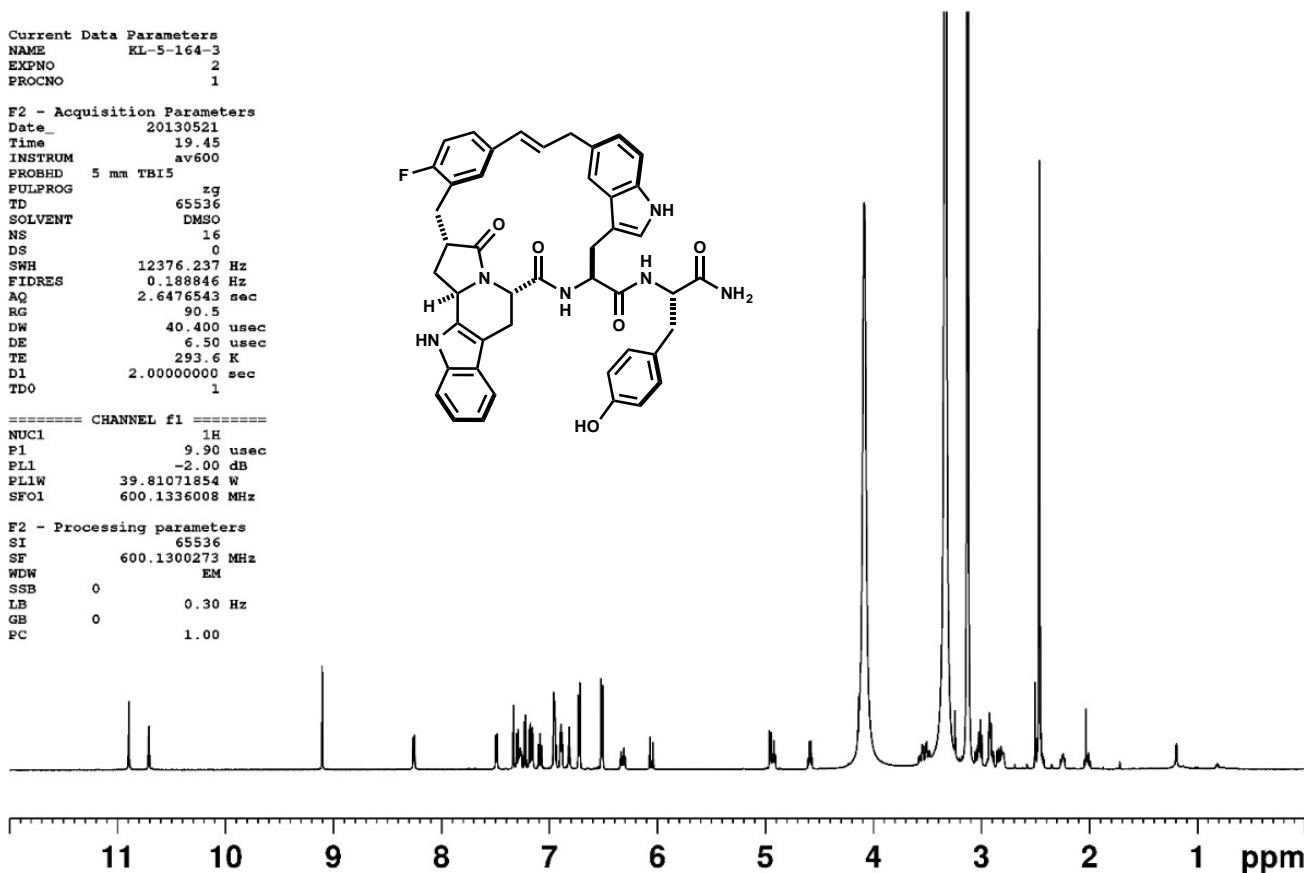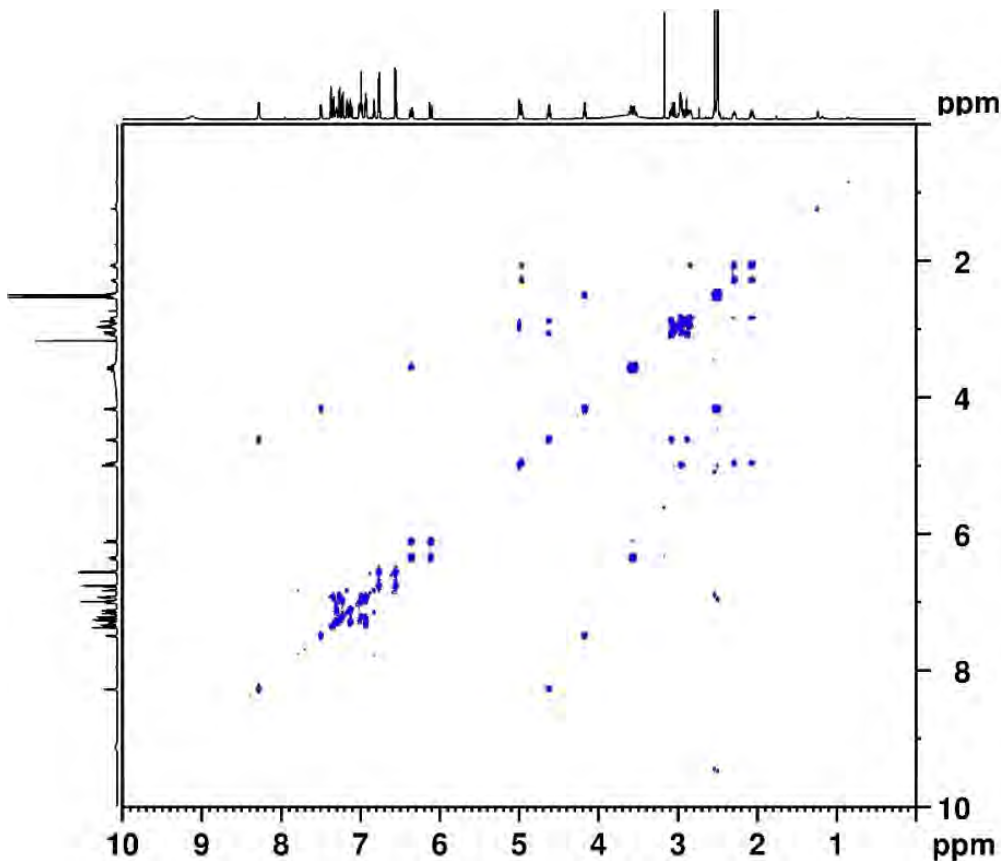

```

Current Data Parameters
NAME      KL-5-164-3
EXPNO    10
PROCNO   1

F2 - Acquisition Parameters
Date_    20130523
Time     20.06
INSTRUM  av600
PROBHD   5 mm TBI5
PULPROG  cosygpmfph
TD        2048
SOLVENT  DMSO
NS        2
DS        16
SWH      7183.908 Hz
FIDRES   3.507768 Hz
AQ        0.1425408 sec
RG        90.5
DW        69.600 usec
DE        6.50 usec
TE        298.0 K
D0        0.00005657 sec
D1        2.0000000 sec
D13       0.00000400 sec
D16       0.00020000 sec
IN0       0.00013885 sec

===== CHANNEL f1 =====
NUC1      1H
P1        10.10 usec
P2        20.20 usec
PL1       -2.00 dB
PLLW      39.81071854 W
SFO1      600.1336008 MHz

===== GRADIENT CHANNEL =====
GPNAM[1]  SINE.100
GPNAM[2]  SINE.100
GPX1      0 %
GPX2      0 %
GPY1      0 %
GPY2      0 %
GPZ1      10.00 %
GPZ2      20.00 %
P16       1000.00 usec

F1 - Acquisition parameters
TD        512
SFO1      600.1336 MHz
FIDRES    14.065631 Hz
SW        12.000 ppm
FnMODE    States-TPPI
    
```

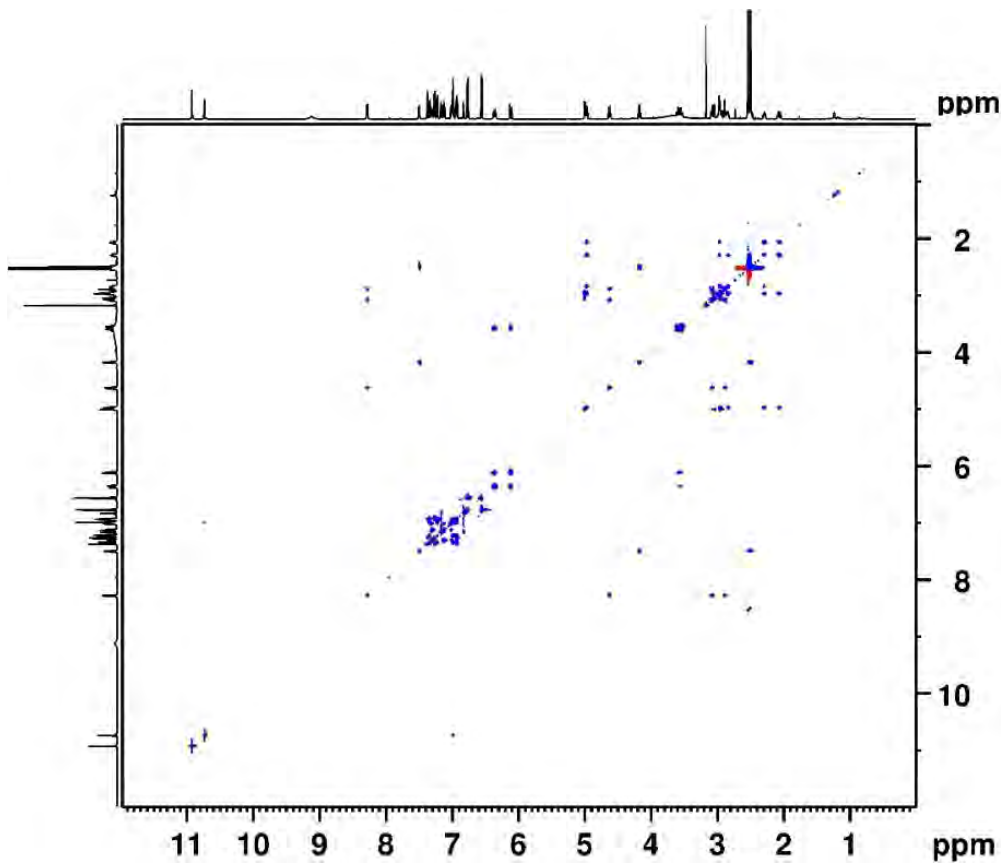

Current Data Parameters  
 NAME KL-5-164-3  
 EXPNO 9  
 PROCNO 1

F2 - Acquisition Parameters  
 Date\_ 20130523  
 Time 19.33  
 INSTRUM av600  
 PROBHD 5 mm TBI5  
 PULPROG mlevatgp.js  
 TD 4096  
 SOLVENT DMSO  
 NS 2  
 DS 16  
 SWH 7183.908 Hz  
 FIDRES 1.753884 Hz  
 AQ 0.2850816 sec  
 RG 90.5  
 DW 69.600 usec  
 DE 6.50 usec  
 TE 298.0 K  
 D0 0.00000300 sec  
 D1 1.20000005 sec  
 D9 0.06000000 sec  
 D11 0.03000000 sec  
 D12 0.00002000 sec  
 D16 0.00020000 sec  
 INO 0.00013885 sec  
 L1 24

===== CHANNEL f1 =====  
 NUC1 1H  
 P1 10.10 usec  
 P2 20.20 usec  
 P5 26.68 usec  
 P6 40.00 usec  
 P7 80.00 usec  
 P17 2500.00 usec  
 PL1 -2.00 dB  
 PL10 9.54 dB  
 PL1W 39.81071854 W  
 SFO1 600.1336008 MHz

===== GRADIENT CHANNEL =====  
 GENAM[1] SINE.100  
 GENAM[2] SINE.100  
 GPX1 0 %  
 GPX2 0 %  
 GPY1 0 %  
 GPY2 0 %  
 GPZ1 30.00 %  
 GPZ2 30.00 %

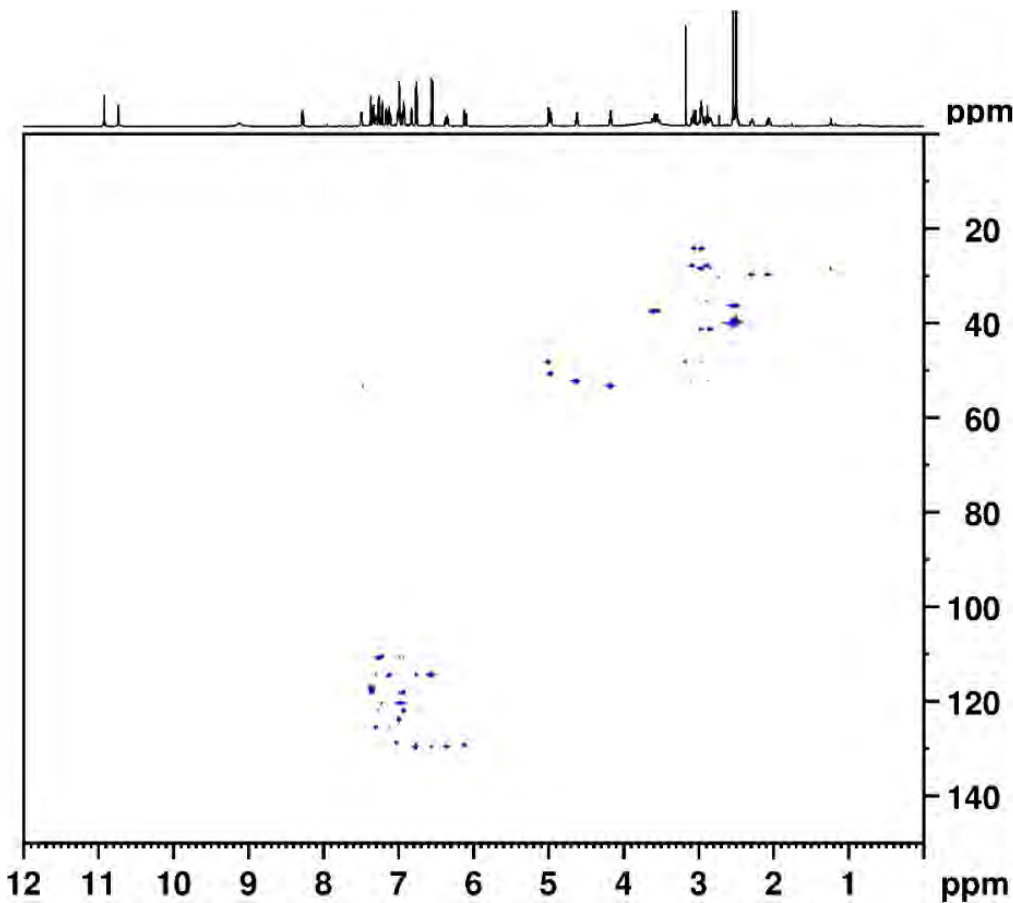

Current Data Parameters  
 NAME KL-5-164-3  
 EXPNO 11  
 PROCNO 1

F2 - Acquisition Parameters  
 Date\_ 20130523  
 Time 20.44  
 INSTRUM av600  
 PROBHD 5 mm TBI5  
 PULPROG hsqcetgpsisp  
 TD 2048  
 SOLVENT DMSO  
 NS 8  
 DS 16  
 SWH 7183.908 Hz  
 FIDRES 3.507768 Hz  
 AQ 0.1425408 sec  
 RG 16384  
 DW 69.600 usec  
 DE 6.00 usec  
 TE 298.1 K  
 CNST2 145.0000000  
 D0 0.00000300 sec  
 D1 1.20000005 sec  
 D4 0.00172414 sec  
 D11 0.03000000 sec  
 D16 0.00020000 sec  
 D24 0.00086200 sec  
 INO 0.00002070 sec

===== CHANNEL f1 =====  
 NUC1 1H  
 P1 10.10 usec  
 P2 20.20 usec  
 P28 1000.00 usec  
 PL1 -2.00 dB  
 PL1W 39.81071854 W  
 SFO1 600.1330006 MHz

===== CHANNEL f2 =====  
 CPDPRG[2] garp  
 NUC2 13C  
 P3 18.50 usec  
 P4 37.00 usec  
 P14 1000.00 usec  
 PCPD2 65.00 usec  
 P10 120.00 dB  
 PL2 -3.00 dB  
 PL12 7.91 dB  
 P10W 0 W  
 P12W 150.35617065 W  
 SFO2 150.9133722 MHz

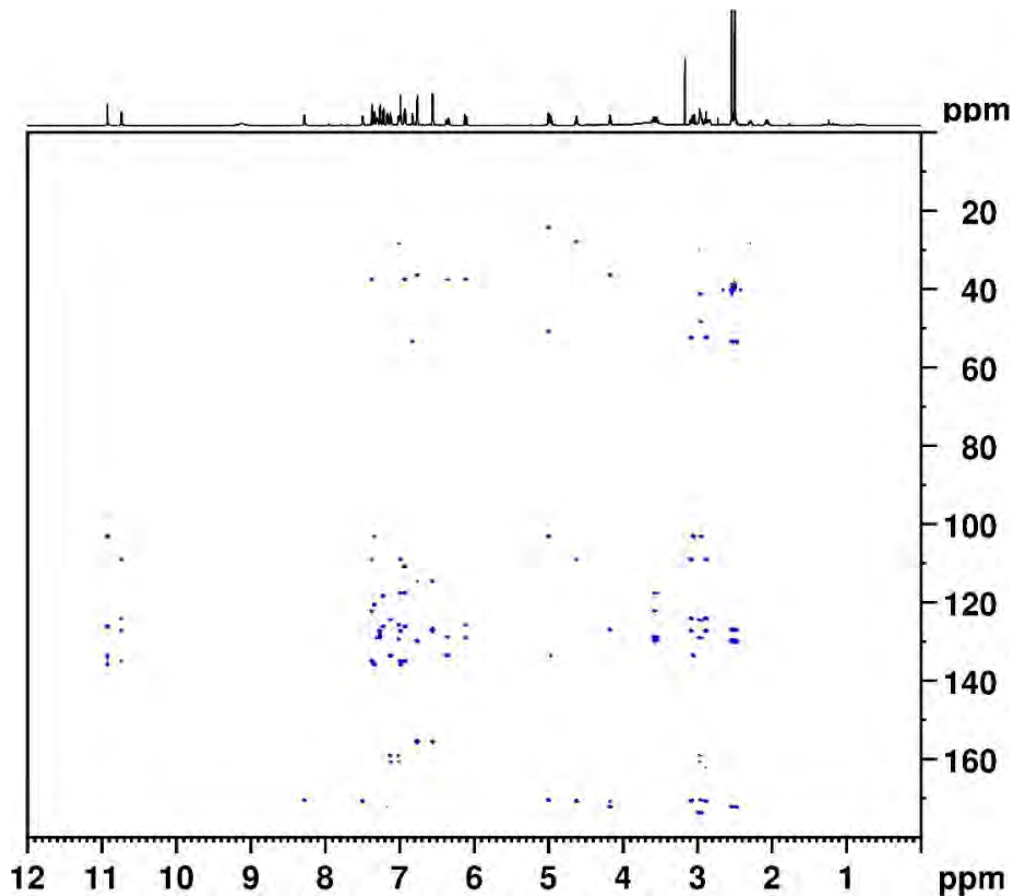

Current Data Parameters  
 NAME KL-5-164-3  
 EXPNO 12  
 PROCNO 1

F2 - Acquisition Parameters  
 Date\_ 20130523  
 Time 22.19  
 INSTRUM av600  
 PROBHD 5 mm TBI5  
 PULPROG hmbcggplndqf  
 TD 2048  
 SOLVENT DMSO  
 NS 16  
 DS 64  
 SWH 6887.052 Hz  
 FIDRES 3.362818 Hz  
 AQ 0.1486848 sec  
 RG 26008  
 DW 72.600 usec  
 DE 6.00 usec  
 TE 298.0 K  
 CNST2 145.0000000  
 CNST13 7.0000000  
 D0 0.00000300 sec  
 D1 1.20000005 sec  
 D2 0.00344828 sec  
 D6 0.07142857 sec  
 D16 0.00020000 sec  
 INO 0.00001745 sec

===== CHANNEL f1 =====  
 NUC1 1H  
 P1 10.10 usec  
 P2 20.20 usec  
 PL1 -2.00 dB  
 PL1W 39.81071854 W  
 SFO1 600.1334507 MHz

===== CHANNEL f2 =====  
 NUC2 13C  
 P3 18.50 usec  
 PL2 -3.00 dB  
 PL2W 150.35617065 W  
 SFO2 150.9156357 MHz

===== GRADIENT CHANNEL =====  
 GENAM[1] SINE.100  
 GENAM[2] SINE.100  
 GENAM[3] SINE.100  
 GPX1 0 %  
 GPX2 0 %  
 GPX3 0 %  
 GPY1 0 %  
 GPY2 0 %

Macrocyclic Product **28e**

Current Data Parameters  
 NAME KL-5-255-5  
 EXPNO 3  
 PROCNO 1

F2 - Acquisition Parameters  
 Date\_ 20140207  
 Time 19.19  
 INSTRUM av500  
 PROBHD 5 mm DCH 13C-1  
 PULPROG zg  
 TD 65536  
 SOLVENT DMSO  
 NS 16  
 DS 0  
 SWH 10000.000 Hz  
 FIDRES 0.152588 Hz  
 AQ 3.2767999 sec  
 RG 12.14  
 DW 50.000 usec  
 DE 10.00 usec  
 TE 298.0 K  
 D1 2.0000000 sec  
 TDO 1

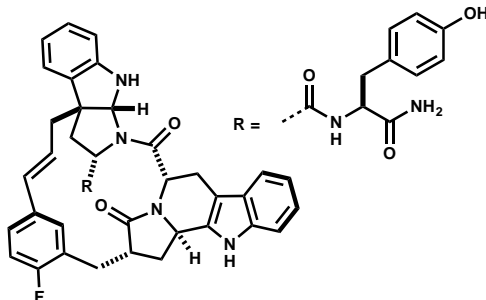

===== CHANNEL f1 =====  
 SFOL 500.1330008 MHz  
 NUCL 1H  
 P1 10.50 usec  
 PLW1 13.5000000 W

F2 - Processing parameters  
 SI 65536  
 SF 500.1300146 MHz  
 WDW EM  
 SSB 0  
 LB 0.30 Hz  
 GB 0  
 PC 1.00

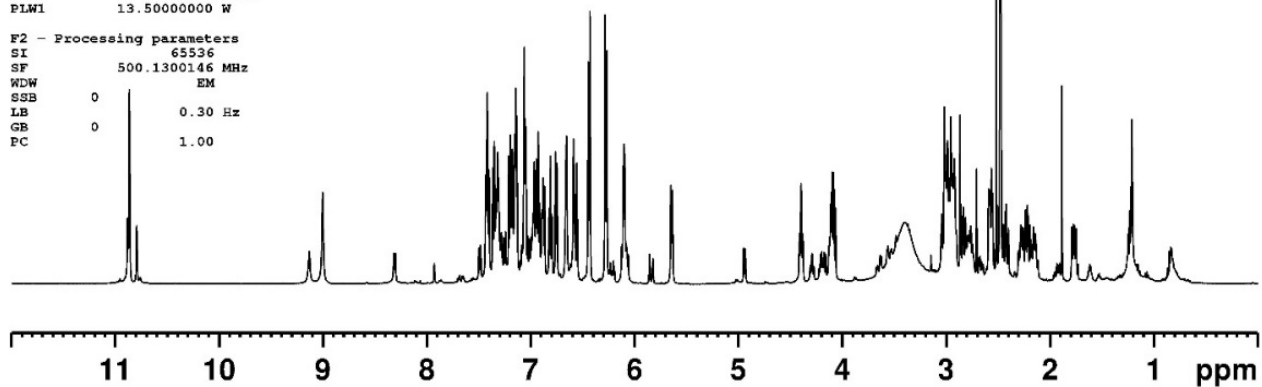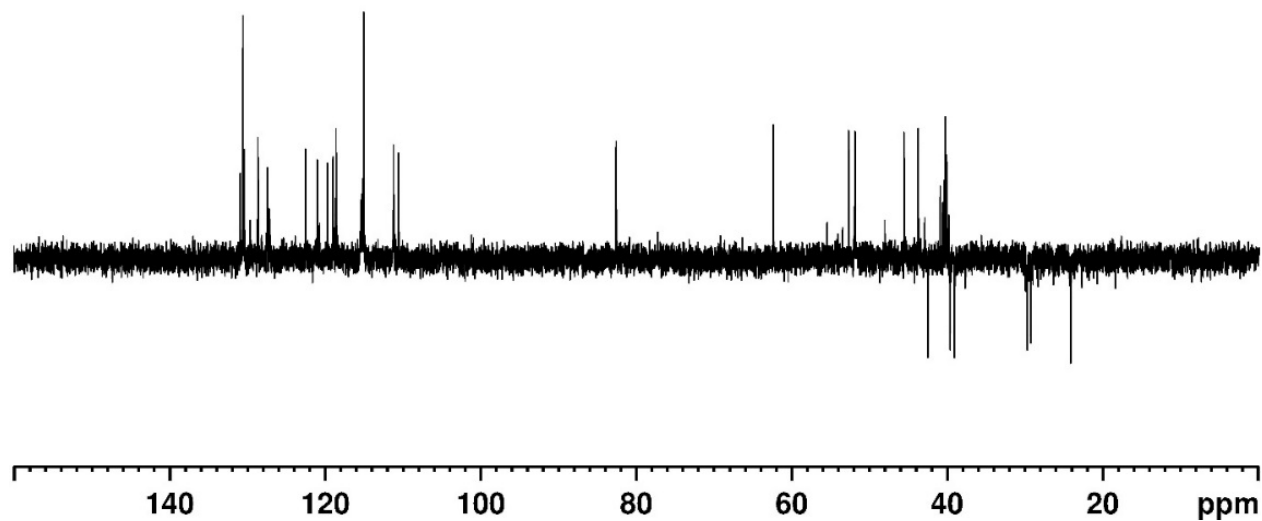

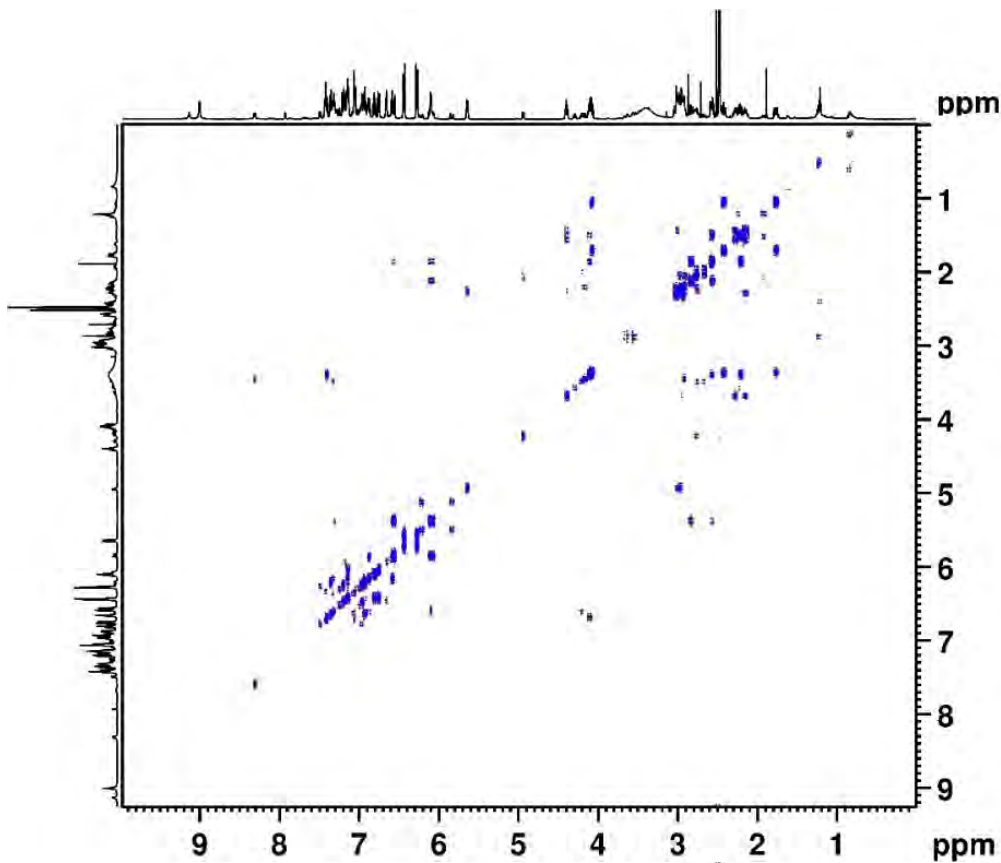

Current Data Parameters  
 NAME KL-5-255-5  
 EXPNO 6  
 PROCNO 1

F2 - Acquisition Parameters  
 Date\_ 20140207  
 Time 19.40  
 INSTRUM av500  
 PROBHD 5 mm DCH 13C-1  
 PULPROG cosygmph  
 TD 4096  
 SOLVENT DMSO  
 NS 2  
 DS 8  
 SWH 5000.000 Hz  
 FIDRES 1.220703 Hz  
 AQ 0.4096000 sec  
 RG 204.86  
 DW 100.000 usec  
 DE 10.00 usec  
 TE 298.0 K  
 D0 0.00008663 sec  
 D1 2.00000000 sec  
 D13 0.00000400 sec  
 D16 0.00020000 sec  
 IN0 0.00020000 sec

===== CHANNEL f1 =====  
 SF01 500.1325007 MHz  
 NUC1 1H  
 P1 10.50 usec  
 P2 21.00 usec  
 PLW1 13.50000000 W

===== GRADIENT CHANNEL =====  
 GPNAM[1] SMSQ10.100  
 GPNAM[2] SMSQ10.100  
 GPZ1 10.00 %  
 GPZ2 20.00 %  
 P16 1000.00 usec

F1 - Acquisition parameters  
 TD 256  
 SF01 500.1325 MHz  
 FIDRES 19.531250 Hz  
 SW 9.997 ppm  
 FMODE States-TPPI

F2 - Processing parameters  
 SI 4096  
 SF 500.1300135 MHz  
 WDW SINE  
 SSB 1

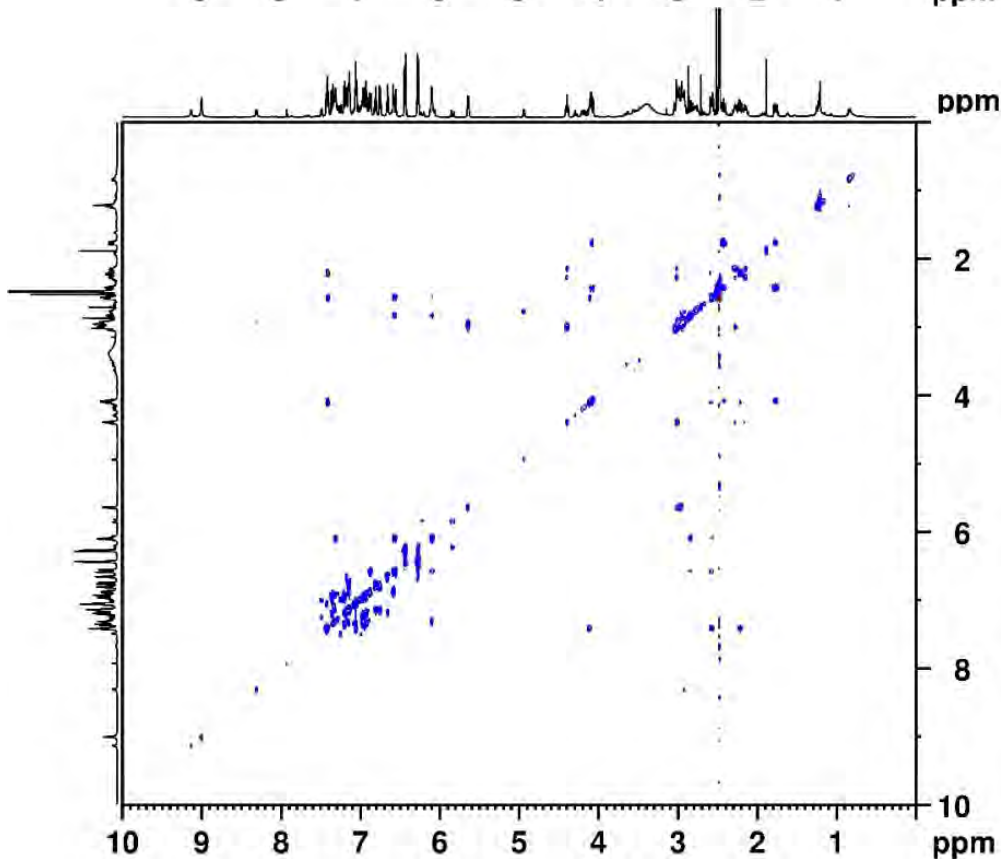

Current Data Parameters  
 NAME KL-5-255-5  
 EXPNO 5  
 PROCNO 1

F2 - Acquisition Parameters  
 Date\_ 20140207  
 Time 19.20  
 INSTRUM av500  
 PROBHD 5 mm DCH 13C-1  
 PULPROG mlevatgp.js  
 TD 2048  
 SOLVENT DMSO  
 NS 2  
 DS 8  
 SWH 5000.000 Hz  
 FIDRES 2.441406 Hz  
 AQ 0.2048000 sec  
 RG 42.28  
 DW 100.000 usec  
 DE 10.00 usec  
 TE 298.0 K  
 D0 0.00000300 sec  
 D1 2.00000000 sec  
 D9 0.05000000 sec  
 D11 0.03000000 sec  
 D12 0.00002000 sec  
 D16 0.00020000 sec  
 IN0 0.00020000 sec  
 L1 24

===== CHANNEL f1 =====  
 SF01 500.1325007 MHz  
 NUC1 1H  
 P1 10.50 usec  
 P2 21.00 usec  
 P5 26.68 usec  
 P6 40.00 usec  
 P7 80.00 usec  
 P17 2500.00 usec  
 PLW1 13.50000000 W  
 PLW10 0.84375000 W

===== GRADIENT CHANNEL =====  
 GPNAM[1] SINE.100  
 GPNAM[2] SINE.100  
 GPZ1 30.00 %  
 GPZ2 30.00 %  
 P16 1000.00 usec

F1 - Acquisition parameters  
 TD 256  
 SF01 500.1325 MHz  
 FIDRES 19.531250 Hz

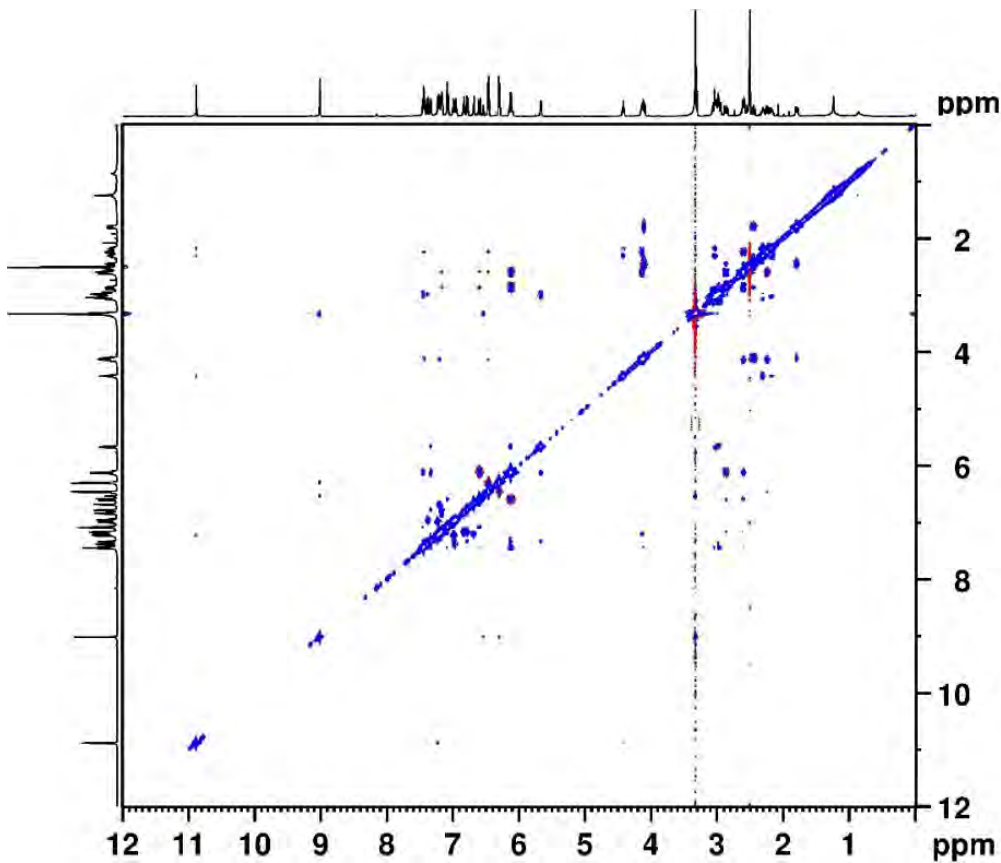

```

Current Data Parameters
NAME      KL-5-255-5_HCO2H
EXPNO    7
PROCNO   1

F2 - Acquisition Parameters
Date_    20140214
Time     0.09
INSTRUM  av500
PROBHD   5 mm DCH 13C-1
PULPROG  noesygpph
TD       2048
SOLVENT  DMSO
NS       24
DS       8
SWH      6009.615 Hz
FIDRES   2.934382 Hz
AQ       0.1703936 sec
RG       26.58
DW       83.200 usec
DE       10.00 usec
TE       298.0 K
D0       0.00007047 sec
D1       4.00000000 sec
D8       0.10000000 sec
D16      0.00020000 sec
IN0      0.00016640 sec
  
```

```

===== CHANNEL f1 =====
SF01    500.1330008 MHz
NUC1     1H
P1       10.00 usec
P2       20.00 usec
PLW1    13.50000000 W
  
```

```

===== GRADIENT CHANNEL =====
GPNAM[1] SINE.100
GPZ1     40.00 %
P16      1000.00 usec
  
```

```

F1 - Acquisition parameters
TD       256
SF01    500.133 MHz
FIDRES   23.475060 Hz
SW       12.016 ppm
FnMODE   States-TPPI
  
```

```

F2 - Processing parameters
SI       2048
SF       500.1300028 MHz
WDW      QSINE
SSB      2
LB       0 Hz
GB       0
  
```

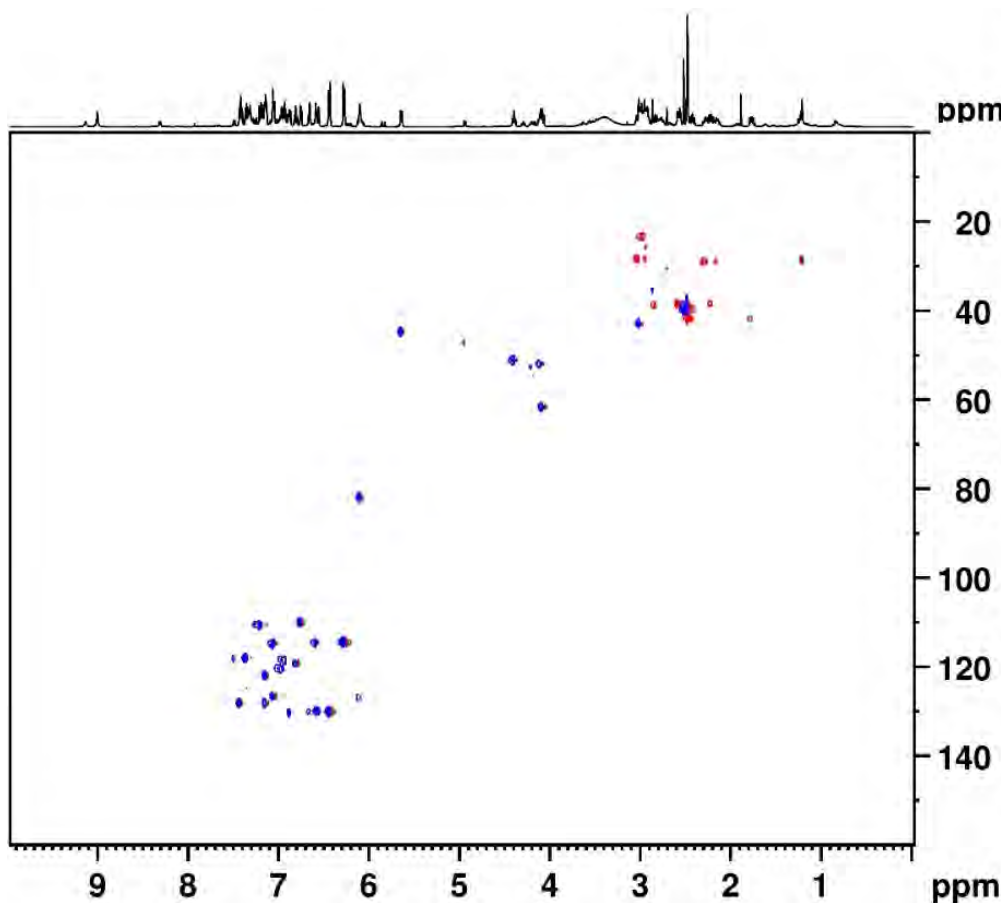

```

Current Data Parameters
NAME      KL-5-255-5
EXPNO    7
PROCNO   1
  
```

```

F2 - Acquisition Parameters
Date_    20140207
Time     20.01
INSTRUM  av500
PROBHD   5 mm DCH 13C-1
PULPROG  hsqcedetgp
TD       2048
SOLVENT  DMSO
NS       8
DS       16
SWH      5000.000 Hz
FIDRES   2.441406 Hz
AQ       0.2048000 sec
RG       204.86
DW       100.000 usec
DE       10.00 usec
TE       298.0 K
CNST2    145.0000000
D0       0.00000300 sec
D1       1.50000000 sec
D4       0.00172414 sec
D11      0.03000000 sec
D13      0.00000400 sec
D16      0.00020000 sec
D21      0.00345000 sec
IN0      0.00001990 sec
ZGPTNS
  
```

```

===== CHANNEL f1 =====
SF01    500.1325007 MHz
NUC1     1H
P1       10.50 usec
P2       21.00 usec
P28      0 usec
PLW1    13.50000000 W
  
```

```

===== CHANNEL f2 =====
SF02    125.7678496 MHz
NUC2     13C
CPDPRG[2] garp
F3       9.63 usec
F4       19.26 usec
PCPD2    70.00 usec
PLW2    23.01399994 W
PLW12    0.43557000 W
  
```

```

===== GRADIENT CHANNEL =====
GPNAM[1] SMSQ10.100
GPNAM[2] SMSQ10.100
GPZ1     80.00 %
  
```



Current Data Parameters  
 NAME KL-5-255-5  
 EXPNO 8  
 PROCNO 1

F2 - Acquisition Parameters  
 Date\_ 20140207  
 Time 21.01  
 INSTRUM av500  
 PROBHD 5 mm DCH 13C-1  
 PULPROG hmbcgp12ndqf  
 TD 2048  
 SOLVENT DMSO  
 NS 24  
 DS 16  
 SWH 5000.000 Hz  
 FIDRES 2.441406 Hz  
 AQ 0.2048000 sec  
 RG 204.86  
 DW 100.000 usec  
 DE 10.00 usec  
 TE 298.0 K  
 CNST6 120.0000000  
 CNST7 160.0000000  
 CNST13 7.0000000  
 D0 0.00000300 sec  
 D1 1.50000000 sec  
 D6 0.07142857 sec  
 D16 0.00020000 sec  
 INO 0.00001990 sec

==== CHANNEL f1 =====  
 SFO1 500.1325007 MHz  
 NUC1 1H  
 P1 10.50 usec  
 P2 21.00 usec  
 PLW1 13.50000000 W

==== CHANNEL f2 =====  
 SFO2 125.7703648 MHz  
 NUC2 13C  
 P3 9.63 usec  
 PLW2 23.01399994 W

==== GRADIENT CHANNEL =====  
 GPNAM[1] SMSQ10.100  
 GPNAM[2] SMSQ10.100  
 GPNAM[3] SMSQ10.100  
 GPNAM[4] SMSQ10.100  
 GPNAM[5] SMSQ10.100  
 GPNAM[6] SMSQ10.100  
 GPZ1 50.00 %  
 GPZ2 30.00 %  
 GPZ3 40.10 %  
 GPZ4 15.00 %

Macrocyclic Product **28f**

```
Current Data Parameters
NAME      KL-5-164-6
EXPNO    3
PROCNO   1

F2 - Acquisition Parameters
Date_    20130529
Time     19.15
INSTRUM av600
PROBHD   5 mm TBI5
PULPROG zgpr
TD       65536
SOLVENT  DMSO
NS       16
DS       0
SWH      12376.237 Hz
FIDRES   0.188846 Hz
AQ       2.6476543 sec
RG       256
DW       40.400 usec
DE       6.50 usec
TE       298.0 K
D1       2.0000000 sec
D12      0.0000200 sec
TD0      1
```

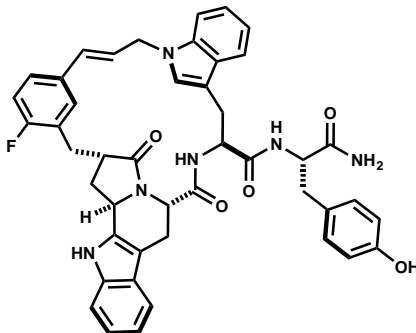

```
===== CHANNEL f1 =====
NUC1     1H
P1       9.75 usec
PL1      -1.00 dB
PL9      49.46 dB
PL1W     31.62277603 W
PL9W     0.00028445 W
SFO1     600.1319714 MHz
```

```
F2 - Processing parameters
SI       65536
SF       600.1300040 MHz
WDW      EM
SSB      0
LB       0.30 Hz
GB       0
PC       1.00
```

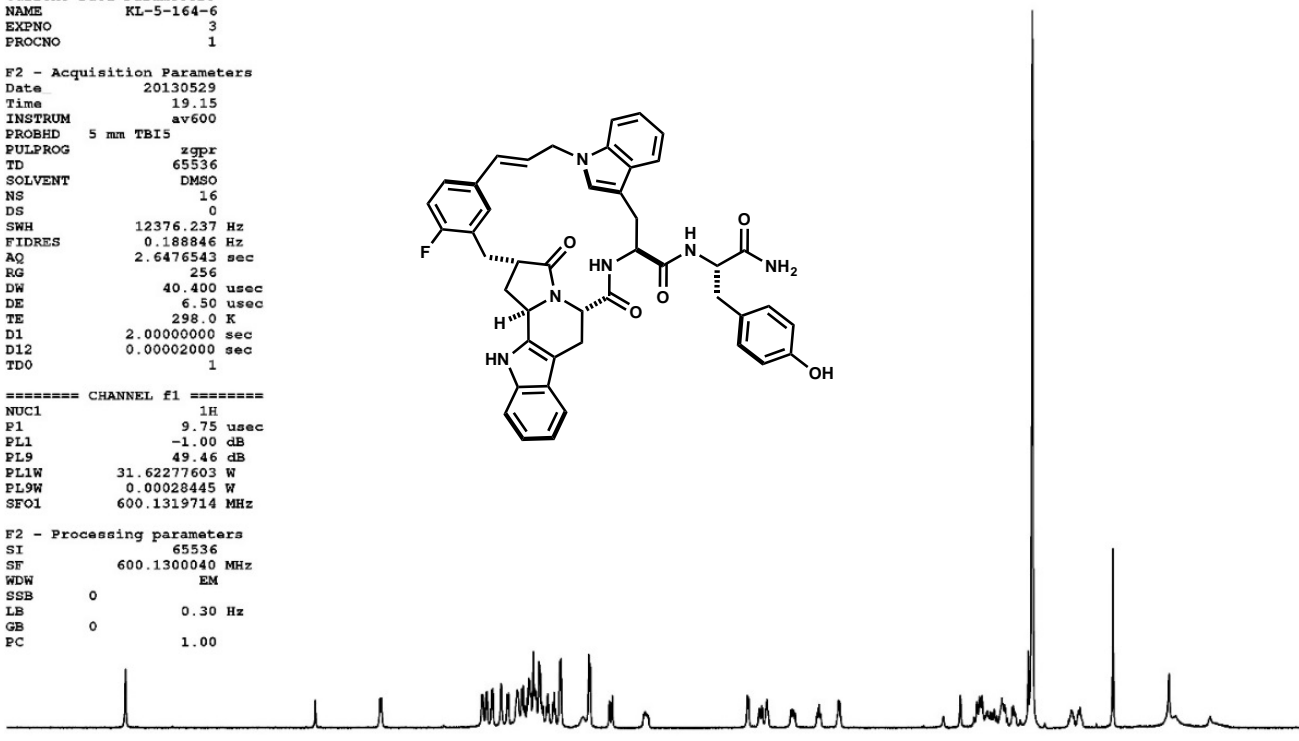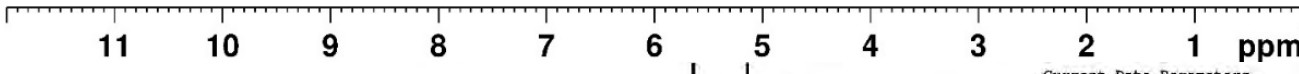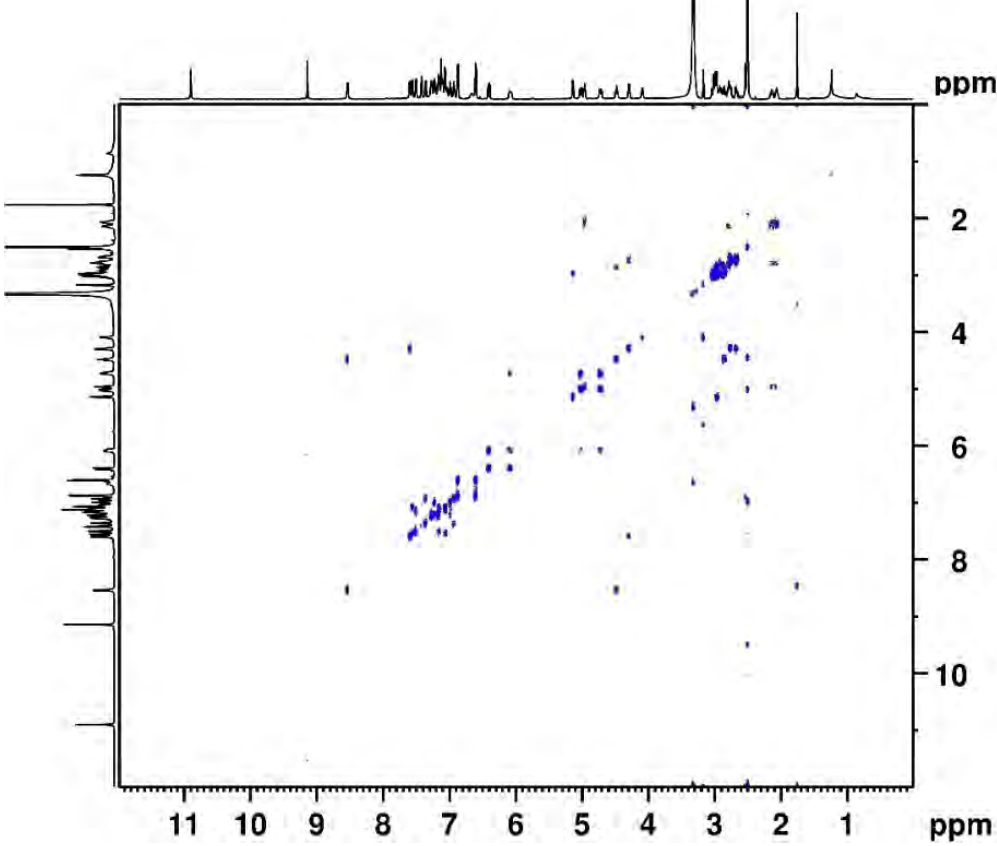

```
Current Data Parameters
NAME      KL-5-164-6
EXPNO    6
PROCNO   1
```

```
F2 - Acquisition Parameters
Date_    20130529
Time     20.28
INSTRUM av600
PROBHD   5 mm TBI5
PULPROG cosygpmph
TD       2048
SOLVENT  DMSO
NS       4
DS       16
SWH      7183.908 Hz
FIDRES   3.507768 Hz
AQ       0.1425408 sec
RG       181
DW       69.600 usec
DE       6.50 usec
TE       298.0 K
D0       0.00005695 sec
D1       2.0000000 sec
D13      0.0000040 sec
D16      0.0002000 sec
IN0      0.00013885 sec
```

```
===== CHANNEL f1 =====
NUC1     1H
P1       9.80 usec
P2       19.60 usec
PL1      -2.00 dB
PL1W     39.81071854 W
SFO1     600.1336008 MHz
```

```
===== GRADIENT CHANNEL =====
GPNAM[1] SINE.100
GPNAM[2] SINE.100
GPX1     0 %
GPX2     0 %
GPY1     0 %
GPY2     0 %
GPZ1     10.00 %
GPZ2     20.00 %
P16     1000.00 usec
```

```
F1 - Acquisition parameters
TD       256
SFO1     600.1336 MHz
FIDRES   28.131262 Hz
SW       12.000 ppm
FnMODE   States-TPPI
```



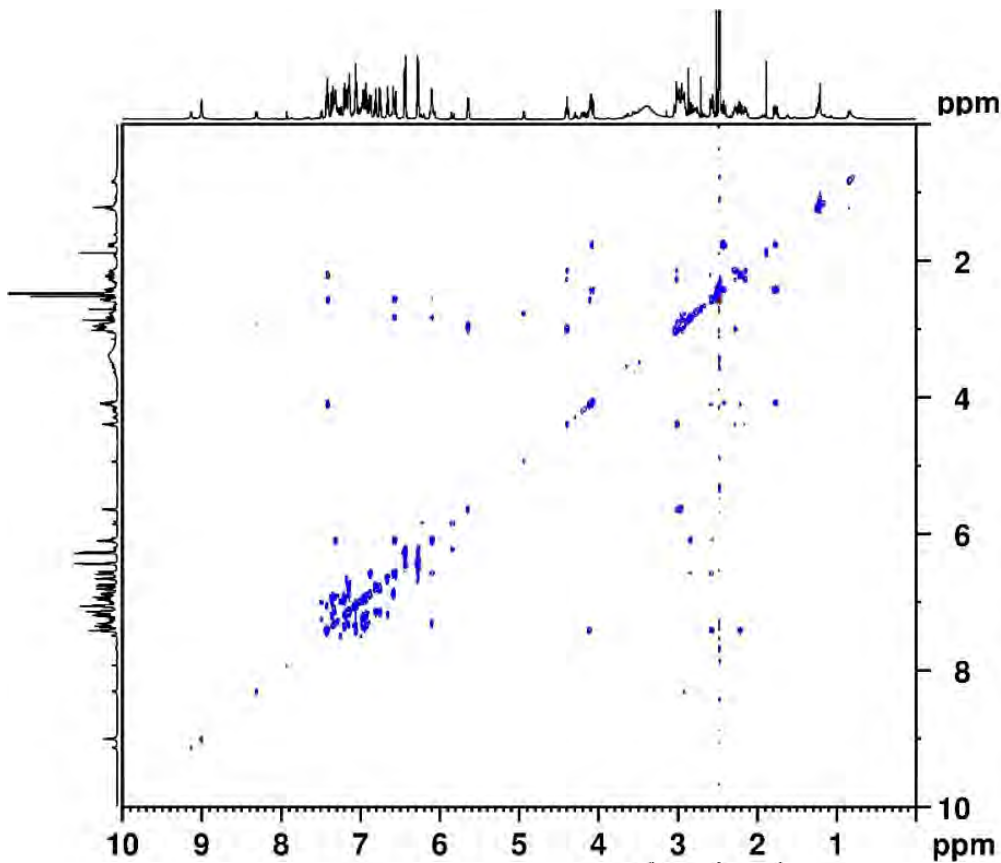

```

Current Data Parameters
NAME      KL-5-255-5
EXPNO    5
PROCNO   1

F2 - Acquisition Parameters
Date_    20140207
Time     19.20
INSTRUM  av500
PROBHD   5 mm DCH 13C-1
PULPROG  mlevatgp.js
TD       2048
SOLVENT  DMSO
NS       2
DS       8
SWH      5000.000 Hz
FIDRES   2.441406 Hz
AQ       0.2048000 sec
RG       42.28
DW       100.000 usec
DE       10.00 usec
TE       298.0 K
D0       0.00000300 sec
D1       2.00000000 sec
D9       0.06000000 sec
D11      0.03000000 sec
D12      0.00002000 sec
D16      0.00020000 sec
IN0      0.00020000 sec
L1       24

===== CHANNEL f1 =====
SFO1     500.1325007 MHz
NUC1     1H
P1       10.50 usec
P2       21.00 usec
P5       26.68 usec
P6       40.00 usec
P7       80.00 usec
P17      2500.00 usec
PLW1     13.50000000 W
PLW10    0.84375000 W

===== GRADIENT CHANNEL =====
GPNAM[1] SINE.100
GPNAM[2] SINE.100
GPZ1     30.00 %
GPZ2     30.00 %
P16      1000.00 usec

F1 - Acquisition parameters
TD       256
SFO1     500.1325 MHz
FIDRES   19.531250 Hz

```

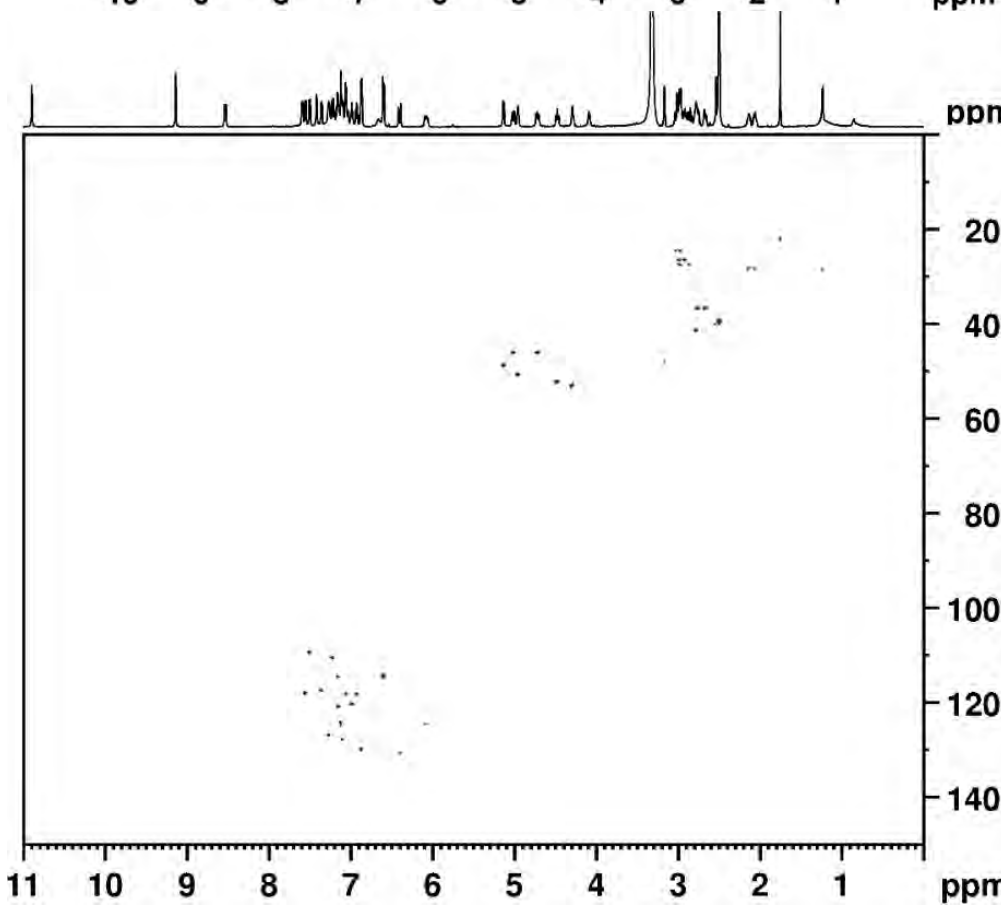

```

Current Data Parameters
NAME      KL-5-164-6
EXPNO    7
PROCNO   1

F2 - Acquisition Parameters
Date_    20130529
Time     21.06
INSTRUM  av600
PROBHD   5 mm TBI5
PULPROG  hsqcetgpsisp
TD       2048
SOLVENT  DMSO
NS       16
DS       16
SWH      7183.908 Hz
FIDRES   3.507768 Hz
AQ       0.1425408 sec
RG       16384
DW       69.600 usec
DE       6.00 usec
TE       298.1 K
CNST2    145.0000000
D0       0.00000300 sec
D1       1.20000005 sec
D4       0.00172414 sec
D11      0.03000000 sec
D16      0.00020000 sec
D24      0.00086200 sec
IN0      0.00002070 sec
ZGPTNS

===== CHANNEL f1 =====
NUC1     1H
P1       9.80 usec
P2       19.60 usec
P28      1000.00 usec
PL1      -2.00 dB
PL1W     39.81071854 W
SFO1     600.1330006 MHz

===== CHANNEL f2 =====
CPDPRG[2] garp
NUC2     13C
P3       18.50 usec
P4       37.00 usec
P14      1000.00 usec
PCPD2    65.00 usec
PLO      120.00 dB
PL2      -3.00 dB
PL12     7.91 dB
PLOW     0 W
PL2W     150.35617065 W
PL12W    12.19330025 W
SFO2     150.9133722 MHz

```

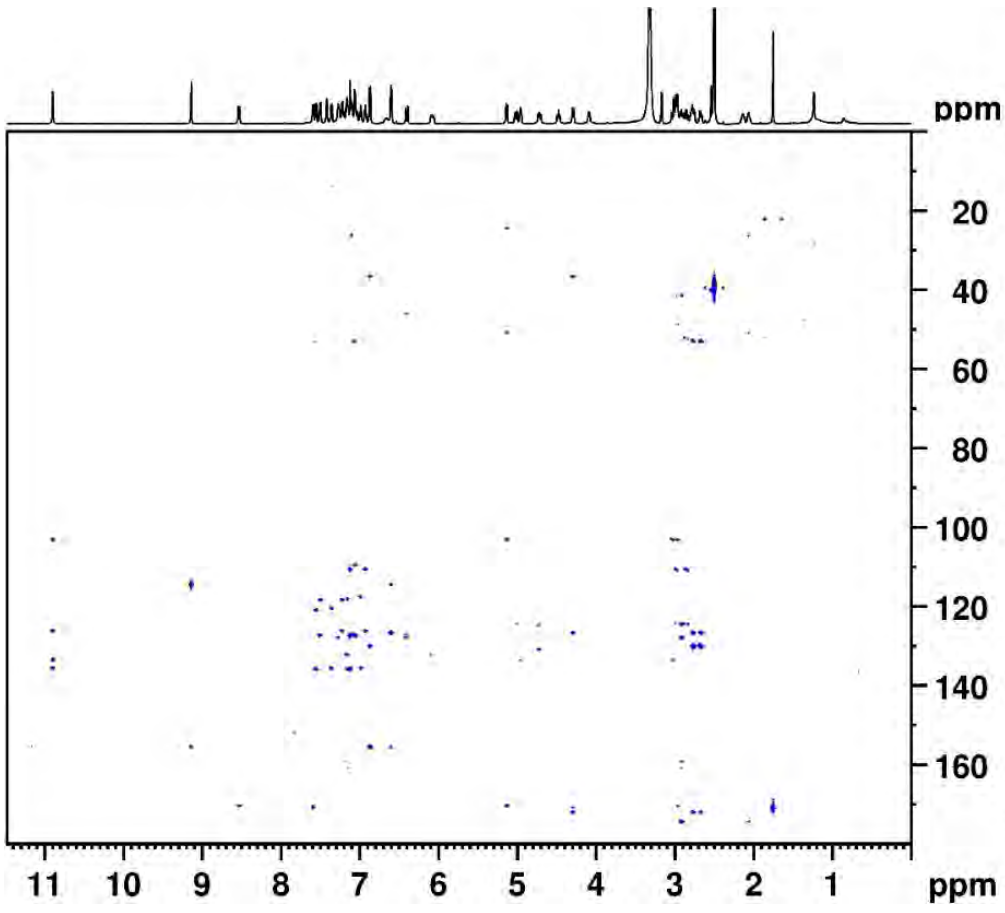

Current Data Parameters  
 NAME KL-5-164-6  
 EXPNO 8  
 PROCNO 1

F2 - Acquisition Parameters  
 Date\_ 20130530  
 Time 0.15  
 INSTRUM av600  
 PROBHD 5 mm TB15  
 PULPROG hmbcgp1pndqf  
 TD 2048  
 SOLVENT DMSO  
 NS 48  
 DS 64  
 SWH 6887.052 Hz  
 FIDRES 3.362818 Hz  
 AQ 0.1486848 sec  
 RG 26008  
 DW 72.600 usec  
 DE 6.00 usec  
 TE 298.0 K  
 CNST2 145.0000000  
 CNST13 7.0000000  
 D0 0.00000300 sec  
 D1 1.20000005 sec  
 D2 0.00344828 sec  
 D6 0.07142857 sec  
 D16 0.00020000 sec  
 IN0 0.00001745 sec

===== CHANNEL f1 =====  
 NUC1 1H  
 P1 9.80 usec  
 P2 19.60 usec  
 PL1 -2.00 dB  
 PL1W 39.81071854 W  
 SFO1 600.1334507 MHz

===== CHANNEL f2 =====  
 NUC2 13C  
 P3 18.50 usec  
 PL2 -3.00 dB  
 PL2W 150.35617065 W  
 SFO2 150.9156357 MHz

===== GRADIENT CHANNEL =====  
 GPNAM[1] SINE.100  
 GPNAM[2] SINE.100  
 GPNAM[3] SINE.100  
 GPX1 0 %  
 GPX2 0 %  
 GPX3 0 %  
 GPY1 0 %  
 GPY2 0 %
